# Supplementary material for: RNA Secondary Structurome Revealed Distinct Thermoregulation in Plasmodium falciparum
Source: Front Cell Dev Biol. 2022 Jan 4;9:766532. doi: 10.3389/fcell.2021.766532 (PMC8763798; doi:10.3389/fcell.2021.766532)
Supplement: Supplementary file 3 [file Table3.XLSX]

## Sheet: ring stage in vivo-26
Gene	start	end	Length	strand	num_exons	Reads	Load	Description
mal_mito_1	734	1486	753	-	1	11927	15.8393	cytochrome c oxidase subunit 3
mal_mito_2	2035	3471	1437	+	1	49975	34.7773	cytochrome c oxidase subunit 1
mal_mito_3	3492	4622	1131	+	1	31021	27.4279	cytochrome b
mal_mito_RNA19:rRNA	5547	5576	30	-	1	1516	50.5333	unspecified product
mal_rna_10:rRNA	1830	1910	81	+	1	20113	248.309	unspecified product
mal_rna_11:rRNA	1916	2023	108	-	1	97740	905	unspecified product
mal_rna_12:rRNA	4594	4618	25	-	1	114	4.56	unspecified product
mal_rna_13:rRNA	4996	5025	30	-	1	3122	104.067	unspecified product
mal_rna_14:rRNA	5026	5201	176	-	1	89315	507.472	unspecified product
mal_rna_15:rRNA	5379	5446	68	-	1	25202	370.618	unspecified product
mal_rna_17:rRNA	5577	5771	195	-	1	203903	1045.66	unspecified product
mal_rna_18:rRNA	5772	5854	83	-	1	22520	271.325	unspecified product
mal_rna_19:rRNA	5855	5955	101	-	1	124095	1228.66	unspecified product
mal_rna_8:rRNA	1650	1688	39	+	1	1168	29.9487	unspecified product
mal_rna_9:rRNA	1697	1763	67	+	1	21508	321.015	unspecified product
malmito_rna_1:rRNA	506	593	88	-	1	56933	646.966	unspecified product
malmito_rna_10:rRNA	625	724	100	-	1	86515	865.15	unspecified product
malmito_rna_15:rRNA	594	624	31	-	1	1695	54.6774	unspecified product
malmito_rna_16:rRNA	3	33	31	+	1	724	23.3548	unspecified product
malmito_rna_17:rRNA	126	165	40	+	1	4664	116.6	unspecified product
malmito_rna_20:rRNA	34	71	38	+	1	5902	155.316	unspecified product
malmito_rna_21:rRNA	1794	1829	36	+	1	4359	121.083	unspecified product
malmito_rna_9:rRNA	72	125	54	+	1	6039	111.833	unspecified product
malmito_rna_LSUC:rRNA	204	226	23	-	1	1584	68.8696	unspecified product
malmito_rna_LSUF:rRNA	1516	1630	115	+	1	38911	338.357	unspecified product
malmito_rna_LSUG:rRNA	283	389	107	-	1	64189	599.897	unspecified product
malmito_rna_RNA11:rRNA	5284	5340	57	-	1	9124	160.07	unspecified product
malmito_rna_RNA12:rRNA	4887	4945	59	+	1	20767	351.983	unspecified product
malmito_rna_RNA14:rRNA	5508	5548	41	-	1	18891	460.756	unspecified product
malmito_rna_RNA18:rRNA	4964	4988	25	+	1	92	3.68	unspecified product
malmito_rna_RNA22:rRNA	5341	5378	38	-	1	2496	65.6842	unspecified product
malmito_rna_RNA4:rRNA	4625	4696	72	+	1	3867	53.7083	unspecified product
malmito_rna_RNA5:rRNA	4716	4802	87	+	1	38316	440.414	unspecified product
malmito_rna_RNA6:rRNA	4808	4865	58	+	1	6461	111.397	unspecified product
malmito_rna_RNA7:rRNA	5202	5283	82	-	1	98153	1196.99	unspecified product
malmito_rna_SSUF:rRNA	5447	5507	61	-	1	7551	123.787	unspecified product
malmito_SSUB:rRNA	390	505	116	-	1	25502	219.845	unspecified product
PF3D7_0102200	98819	102282	3258	+	2	117766	36.1467	ring-infected erythrocyte surface antigen
PF3D7_0102300	104704	105209	354	+	2	1008	2.84746	Plasmodium exported protein, unknown function
PF3D7_0102500	110750	115799	4704	-	4	15697	3.33695	erythrocyte binding antigen-181
PF3D7_0103200	140662	142219	1305	-	2	3527	2.70268	nucleoside transporter 4
PF3D7_0104200	182822	184222	1401	-	1	18327	13.0814	StAR-related lipid transfer protein
PF3D7_0104300	190269	201230	10500	+	3	62167	5.92067	ubiquitin carboxyl-terminal hydrolase 1, putative
PF3D7_0104900	218517	218824	308	-	1	1639	5.32143	RNase MRP
PF3D7_0105000	218894	219223	330	-	1	815	2.4697	unspecified product
PF3D7_0105300	225110	225779	489	-	2	3625	7.41309	cyclase-associated protein
PF3D7_0105400.1	226681	227285	423	-	2	1623	3.83688	conserved Plasmodium protein, unknown function
PF3D7_0105400.2	226681	227285	402	-	2	1469	3.65423	conserved Plasmodium protein, unknown function
PF3D7_0105800	249231	252010	2499	-	2	5594	2.2385	conserved Plasmodium protein, unknown function
PF3D7_0107500	304362	309257	4413	-	4	30599	6.93383	lipid/sterol:H+ symporter
PF3D7_0108000	328431	329558	657	-	4	1577	2.4003	proteasome subunit beta type-3, putative
PF3D7_0108300	337168	343833	6666	+	1	14565	2.18497	conserved Plasmodium protein, unknown function
PF3D7_0108500	349170	349709	540	+	1	13342	24.7074	conserved Plasmodium protein, unknown function
PF3D7_0108600	349995	351626	921	-	6	6100	6.62324	conserved Plasmodium protein, unknown function
PF3D7_0108900	361987	362586	600	-	1	11128	18.5467	unspecified product
PF3D7_0109000	363318	363992	675	+	1	7156	10.6015	photosensitized INA-labeled protein PHIL1, putative
PF3D7_0109400	374439	375087	501	-	2	1015	2.02595	tubulin-specific chaperone a, putative
PF3D7_0110300	393216	393490	275	-	1	731	2.65818	Plasmodium RNA of unknown function RUF5
PF3D7_0110400	393875	394835	750	-	2	1725	2.3	DNA-directed RNA polymerase II subunit RPB9, putative
PF3D7_0110600	405739	412169	5133	+	7	11052	2.15313	phosphatidylinositol-4-phosphate 5-kinase
PF3D7_0111500	439652	441418	1116	-	5	2441	2.18728	UMP-CMP kinase, putative
PF3D7_0111900	450043	450646	246	-	3	617	2.50813	conserved protein, unknown function
PF3D7_0112700	477279	481382	4104	+	1	181504	44.2261	28S ribosomal RNA
PF3D7_0112900	486500	487186	567	+	2	1201	2.11817	Plasmodium exported protein, unknown function
PF3D7_0113000	487892	490127	2022	-	2	6465	3.19733	glutamic acid-rich protein
PF3D7_0202000	103385	105796	1965	-	2	14552	7.4056	knob-associated histidine-rich protein
PF3D7_0202100	109564	110580	909	-	2	4233	4.65677	liver stage associated protein 2
PF3D7_0202500	127994	128314	321	+	1	27370	85.2648	early transcribed membrane protein 2
PF3D7_0203000	141625	147564	5940	-	1	17095	2.87795	repetitive organellar protein, putative
PF3D7_0204200	192818	194199	831	+	5	7323	8.81227	conserved Plasmodium protein, unknown function
PF3D7_0205800	232729	233476	363	-	3	835	2.30028	PH domain-containing protein, putative
PF3D7_0205900	235237	238816	2901	+	4	7180	2.47501	26S proteasome regulatory subunit RPN1, putative
PF3D7_0206100	245358	246699	750	+	4	1977	2.636	cysteine desulfuration protein SufE
PF3D7_0206700	271594	273009	1416	+	1	8240	5.81921	adenylosuccinate lyase
PF3D7_0206800	273689	274507	819	-	1	30753	37.5495	merozoite surface protein 2
PF3D7_0206900.1	275540	276494	819	-	2	5461	6.66789	merozoite surface protein 5
PF3D7_0206900.2	275540	276577	786	-	3	5294	6.73537	merozoite surface protein 5
PF3D7_0207000	277494	278456	819	-	2	13929	17.0073	merozoite surface protein 4
PF3D7_0207100	281907	287345	5238	+	3	16068	3.06758	conserved Plasmodium protein, unknown function
PF3D7_0207400	294273	297616	2841	-	4	5713	2.01091	serine repeat antigen 7
PF3D7_0207500	298897	302564	3096	-	4	7825	2.52745	serine repeat antigen 6
PF3D7_0207600	303593	307027	2994	-	4	45098	15.0628	serine repeat antigen 5
PF3D7_0208400	343308	349340	6033	-	1	13956	2.31328	conserved Plasmodium protein, unknown function
PF3D7_0208500	352836	353628	414	+	3	843	2.03623	acyl carrier protein
PF3D7_0209300	387273	388151	723	+	2	1528	2.11342	2C-methyl-D-erythritol 2,4-cyclodiphosphate synthase
PF3D7_0209800	404281	406355	1374	-	2	5966	4.34207	ATP-dependent RNA helicase UAP56
PF3D7_0210000	409983	410228	246	+	1	2325	9.45122	secretory complex protein 61 gamma subunit
PF3D7_0210100.1	412275	412859	291	+	3	3673	12.622	60S ribosomal protein L37ae, putative
PF3D7_0210100.2	412275	412741	108	+	3	381	3.52778	60S ribosomal protein L37ae, putative
PF3D7_0210600	432041	434086	1341	-	5	10467	7.80537	conserved Plasmodium protein, unknown function
PF3D7_0210900	442080	442934	855	-	1	2633	3.07953	conserved Plasmodium protein, unknown function
PF3D7_0212600	522931	523999	753	+	2	4640	6.16202	secreted protein with altered thrombospondin repeat domain
PF3D7_0212900	533253	534350	1098	+	1	2605	2.3725	arginyl-tRNA--protein transferase
PF3D7_0213000	535646	536146	501	+	1	1456	2.90619	conserved Plasmodium protein, unknown function
PF3D7_0214600	594196	599340	5145	+	1	15293	2.9724	serine/threonine protein kinase, putative
PF3D7_0214900	610625	615372	2853	+	15	10549	3.69751	rhoptry neck protein 6
PF3D7_0216700.1	690311	695783	4152	+	7	9195	2.2146	autophagy-related protein 11, putative
PF3D7_0216700.2	690311	695783	4134	+	7	9161	2.21601	autophagy-related protein 11, putative
PF3D7_0217300	715798	716549	426	-	3	1071	2.51408	AP-2 complex subunit sigma, putative
PF3D7_0217400	717692	718281	447	+	2	966	2.16107	conserved Plasmodium protein, unknown function
PF3D7_0217500	720437	722661	1575	+	5	6609	4.19619	calcium-dependent protein kinase 1
PF3D7_0217800	734272	734595	324	+	1	2540	7.83951	40S ribosomal protein S26
PF3D7_0218500	752966	753439	306	+	2	691	2.25817	small nuclear ribonucleoprotein Sm D2, putative
PF3D7_0218800	766390	767015	626	-	1	6579	10.5096	ribonuclease P
PF3D7_0218900	767584	767743	160	-	1	2126	13.2875	Plasmodium RNA of unknown function RUF2
PF3D7_0219000	767977	768058	82	-	1	968	11.8049	small nucleolar RNA snoR01
PF3D7_0219200	772316	772690	177	+	2	2387	13.4859	40S ribosomal protein S30
PF3D7_0219300	773335	773754	420	-	1	852	2.02857	conserved Plasmodium protein, unknown function
PF3D7_0219400.1	774815	776036	306	+	3	2217	7.2451	ribosome associated membrane protein RAMP4, putative, unspecified product
PF3D7_0219400.2	775639	776036	204	+	2	1391	6.81863	ribosome associated membrane protein RAMP4, putative, unspecified product
PF3D7_0219800	786870	787940	960	-	2	1931	2.01146	Plasmodium exported protein (PHISTc), unknown function
PF3D7_0219900	791464	792381	693	+	2	1630	2.35209	Plasmodium exported protein, unknown function
PF3D7_0220000	796752	801586	4677	+	2	47524	10.1612	liver stage antigen 3
PF3D7_0220200	809511	810298	543	-	2	7192	13.2449	Plasmodium exported protein, unknown function
PF3D7_0220700	833805	834688	759	+	2	1956	2.57708	Plasmodium exported protein (hyp9), unknown function
PF3D7_0301700	96568	97907	954	-	2	2085	2.18553	Plasmodium exported protein, unknown function
PF3D7_0302200	119458	124735	4251	+	9	20091	4.72618	cytoadherence linked asexual protein 3.2
PF3D7_0302500	135418	140660	4254	+	9	46187	10.8573	cytoadherence linked asexual protein 3.1
PF3D7_0303200	169571	174300	3489	+	5	12475	3.57552	HAD superfamily protein, putative
PF3D7_0304100	204542	206119	1578	+	1	3357	2.12738	inner membrane complex protein 1e, putative
PF3D7_0304400	217941	218489	315	+	2	4304	13.6635	60S ribosomal protein L44
PF3D7_0305200	251242	254661	3420	+	1	7020	2.05263	conserved Plasmodium protein, unknown function
PF3D7_0305300	255276	258416	2871	-	3	5810	2.02369	conserved Plasmodium membrane protein, unknown function
PF3D7_0305600	275864	277717	1854	-	1	4013	2.16451	AP endonuclease (DNA-[apurinic or apyrimidinic site] lyase), putative
PF3D7_0305700	278956	279828	429	-	3	1849	4.31002	ubiquitin-conjugating enzyme E2, putative
PF3D7_0306300	295107	296094	336	-	5	945	2.8125	glutaredoxin 1
PF3D7_0306700	304317	304999	351	+	4	827	2.35613	membrane magnesium transporter, putative
PF3D7_0306900	310652	311805	438	+	3	5905	13.4817	40S ribosomal protein S23, putative
PF3D7_0307100	312693	313342	426	-	2	3052	7.16432	40S ribosomal protein S12, putative
PF3D7_0307200	314976	316236	774	-	3	5935	7.66796	60S ribosomal protein L7, putative
PF3D7_0307400	321050	322162	1113	-	1	3204	2.87871	ATP-dependent Clp protease proteolytic subunit
PF3D7_0308300	365659	366672	1014	-	1	3732	3.68047	conserved Plasmodium protein, unknown function
PF3D7_0308400	368572	368690	119	+	1	556	4.67227	U4 spliceosomal RNA
PF3D7_0308500	369925	370789	423	+	3	2172	5.13475	activator of Hsp90 ATPase, putative
PF3D7_0308600	372632	374230	1599	+	1	3422	2.14009	pre-mRNA-processing factor 19, putative
PF3D7_0308800	378045	378517	327	+	2	879	2.68807	conserved protein, unknown function
PF3D7_0309500	402933	405440	1833	+	2	3869	2.11075	asparagine synthetase [glutamine-hydrolyzing], putative
PF3D7_0309600	407980	408318	339	+	1	7636	22.5251	60S acidic ribosomal protein P2
PF3D7_0310400	447500	451384	3885	+	1	10075	2.59331	parasite-infected erythrocyte surface protein
PF3D7_0310600.1	461175	462027	708	-	2	1492	2.10734	eukaryotic translation initiation factor 3 subunit K, putative, unspecified product
PF3D7_0310600.2	461175	462027	705	-	2	1480	2.09929	eukaryotic translation initiation factor 3 subunit K, putative, unspecified product
PF3D7_0310700	463326	464274	438	+	2	1304	2.97717	trafficking protein particle complex subunit 4, putative
PF3D7_0310800	464662	464991	330	+	1	807	2.44545	conserved Plasmodium protein, unknown function
PF3D7_0311300	480122	483453	2862	-	4	6218	2.17261	phosphatidylinositol 3- and 4-kinase, putative
PF3D7_0311500	497118	497363	246	-	1	684	2.78049	conserved Plasmodium protein, unknown function
PF3D7_0312300	521969	522883	915	+	1	1944	2.12459	26S proteasome regulatory subunit RPN12, putative
PF3D7_0312400	524154	526439	1323	-	7	4669	3.5291	glycogen synthase kinase 3
PF3D7_0312600	531213	531289	77	+	1	266	3.45455	tRNA Valine
PF3D7_0312800	534239	535238	381	+	3	3627	9.51969	60S ribosomal protein L26, putative
PF3D7_0314100.1	569308	571051	597	-	8	1541	2.58124	vesicle transport v-SNARE protein, putative
PF3D7_0314100.2	570283	571051	213	-	4	611	2.86854	vesicle transport v-SNARE protein, putative
PF3D7_0314600	586555	587331	777	+	1	1658	2.13385	conserved Plasmodium protein, unknown function
PF3D7_0315400	630611	631381	771	-	1	4344	5.63424	conserved Plasmodium protein, unknown function
PF3D7_0315900	644186	645268	834	+	2	2600	3.11751	conserved Plasmodium protein, unknown function
PF3D7_0316000	645921	646844	924	-	1	3046	3.29654	microneme associated antigen
PF3D7_0316100	648635	649531	897	+	1	3679	4.10145	mitochondrial ribosomal protein L27 precursor, putative
PF3D7_0316300.1	660020	661643	1143	+	3	5391	4.71654	inorganic pyrophosphatase, inorganic pyrophosphatase, putative
PF3D7_0316300.2	658272	661643	1296	+	5	5966	4.6034	inorganic pyrophosphatase, inorganic pyrophosphatase, putative
PF3D7_0316600	669302	670873	930	-	4	4078	4.38495	formate-nitrite transporter
PF3D7_0316700	674458	675636	666	+	2	1482	2.22523	protein YOP1, putative
PF3D7_0316800	677842	678474	393	+	2	4022	10.2341	40S ribosomal protein S15A, putative
PF3D7_0316900	679234	681277	1803	-	2	7190	3.9878	E3 ubiquitin-protein ligase, putative
PF3D7_0317000	682795	683685	759	-	2	2567	3.38208	proteasome subunit alpha type-3, putative
PF3D7_0317600	725015	726130	486	+	3	4582	9.42798	40S ribosomal protein S11, putative
PF3D7_0318700	788453	788812	360	+	1	2438	6.77222	conserved Plasmodium protein, unknown function
PF3D7_0318900	791840	793481	1323	-	3	3368	2.54573	conserved protein, unknown function
PF3D7_0319100	802260	802583	324	-	1	1145	3.53395	E3 ubiquitin-protein ligase RBX1, putative
PF3D7_0319600	817913	818695	471	+	3	1784	3.78769	elongation factor 1-delta, putative
PF3D7_0320000	837307	838271	435	+	5	919	2.11264	protein phosphatase inhibitor 2
PF3D7_0320500	860813	862102	1290	+	1	5229	4.05349	nicotinamidase, putative
PF3D7_0320600	862741	863832	399	-	5	2044	5.12281	conserved Plasmodium protein, unknown function
PF3D7_0320700	865014	866420	540	+	8	1947	3.60556	signal peptidase complex subunit SPC2, putative
PF3D7_0320900	875213	876295	477	+	3	11386	23.87	histone H2A.Z
PF3D7_0321000	877735	879511	1479	+	2	3082	2.08384	conserved Plasmodium protein, unknown function
PF3D7_0321400	894761	896112	960	+	4	2035	2.11979	protein kinase, putative
PF3D7_0322000	928644	929159	516	-	1	6875	13.3236	peptidyl-prolyl cis-trans isomerase
PF3D7_0322900	965553	966502	789	-	2	7415	9.39797	40S ribosomal protein S3A, putative
PF3D7_0323000	968675	969202	165	-	3	836	5.06667	translation machinery-associated protein 7, putative
PF3D7_0323400	980706	983966	3261	-	1	10587	3.24655	Rh5 interacting protein
PF3D7_0323500	986265	987610	948	+	4	2989	3.15295	survival motor neuron-like protein
PF3D7_0400200	38955	40154	1200	+	1	2630	2.19167	erythrocyte membrane protein 1 (PfEMP1), exon 2, pseudogene
PF3D7_0401600.1	92576	93809	1044	-	2	3540	3.3908	rifin
PF3D7_0401600.2	92576	93809	1041	-	2	3540	3.40058	rifin
PF3D7_0402000	114601	116058	1287	-	2	3487	2.7094	Plasmodium exported protein (PHISTa), unknown function
PF3D7_0402100	123588	125464	1728	-	2	12559	7.26794	Plasmodium exported protein (PHISTb), unknown function
PF3D7_0402300	137640	146653	8916	+	2	40622	4.55608	reticulocyte binding protein homologue 1
PF3D7_0402400	147490	148380	765	-	2	7439	9.72418	Plasmodium exported protein, unknown function
PF3D7_0403800	211650	213854	2205	-	1	12652	5.73787	alpha/beta hydrolase, putative
PF3D7_0404000	223711	224131	300	-	2	2037	6.79	conserved Plasmodium protein, unknown function
PF3D7_0404700	260454	263418	2820	-	2	21396	7.58723	dipeptidyl aminopeptidase 3
PF3D7_0404800	264305	266170	1704	-	2	3737	2.19308	conserved Plasmodium protein, unknown function
PF3D7_0404900	267244	268380	1137	-	1	8393	7.38171	6-cysteine protein
PF3D7_0405200	279072	281983	1740	+	9	6379	3.66609	ag-1 blood stage membrane protein homologue
PF3D7_0405900	316540	319178	2196	-	4	13348	6.07832	apical sushi protein
PF3D7_0406100	323267	325225	1485	-	2	3455	2.3266	V-type proton ATPase subunit B
PF3D7_0406200	329216	329689	474	+	1	12511	26.3945	sexual stage-specific protein precursor
PF3D7_0407700	377481	383087	4890	-	6	10897	2.22843	conserved Plasmodium protein, unknown function
PF3D7_0407800	384924	390806	5883	+	1	16845	2.86334	conserved Plasmodium protein, unknown function
PF3D7_0407900	391347	393350	2004	-	1	7977	3.98054	AAA family ATPase, putative
PF3D7_0408000	394065	394580	516	-	1	4076	7.89922	conserved Plasmodium protein, unknown function
PF3D7_0409100	436217	437981	1605	-	2	3786	2.35888	U4/U6 small nuclear ribonucleoprotein PRP31, putative
PF3D7_0409700	456922	458020	585	+	4	1754	2.99829	peptide chain release factor 2
PF3D7_0409800	459710	461437	1728	+	1	6142	3.5544	zinc finger protein, putative
PF3D7_0410100	469218	469299	82	+	1	513	6.2561	tRNA Serine
PF3D7_0410700	481177	483891	2715	-	1	9062	3.33775	ribosome biogenesis GTPase A, putative
PF3D7_0410800	485832	489728	3897	+	1	7970	2.04516	conserved Plasmodium protein, unknown function
PF3D7_0413500	615356	616243	888	+	1	3592	4.04505	phosphoglucomutase-2
PF3D7_0413600	616914	618350	1179	-	2	5242	4.44614	26S protease regulatory subunit 6B, putative
PF3D7_0413700	619786	620802	1017	-	1	3087	3.0354	lysine decarboxylase-like protein, putative
PF3D7_0414600	658620	659538	708	-	2	1946	2.74859	acylated pleckstrin-homology domain-containing protein, putative
PF3D7_0414700	660624	662519	1896	+	1	4218	2.22468	GTP-binding protein, putative
PF3D7_0414800	663416	664015	600	-	1	1669	2.78167	conserved Plasmodium protein, unknown function
PF3D7_0414900	665973	668147	828	+	11	4517	5.45531	armadillo-domain containing rhoptry protein
PF3D7_0415400	686414	687040	627	-	1	2101	3.35088	coatomer subunit zeta, putative
PF3D7_0415700	691131	692516	1386	-	1	4411	3.18254	conserved Plasmodium protein, unknown function
PF3D7_0415900	697918	698768	618	-	2	7411	11.9919	60S ribosomal protein L15, putative
PF3D7_0416000	701526	704162	1740	-	7	3698	2.12529	RNA-binding protein, putative
PF3D7_0416500	723073	724242	1170	-	1	2548	2.17778	repressor of RNA polymerase III transcription MAF1
PF3D7_0416700	727710	727979	270	-	1	1143	4.23333	CDGSH iron-sulfur domain-containing protein, putative
PF3D7_0416800	729962	731223	579	+	3	5018	8.66667	small GTP-binding protein sar1
PF3D7_0418300	819362	822340	2979	-	1	19503	6.54683	conserved Plasmodium protein, unknown function
PF3D7_0418600	834394	840429	6036	+	1	13414	2.22233	regulator of chromosome condensation, putative
PF3D7_0419200	854879	855289	411	+	1	1095	2.66423	protein transport protein GOT1, putative
PF3D7_0419600	870737	871873	843	+	2	3250	3.85528	ran-specific GTPase-activating protein 1, putative
PF3D7_0419700	873138	874115	978	+	1	7734	7.90798	apical merozoite protein
PF3D7_0419800	874811	875521	711	-	1	4798	6.74824	60S ribosomal protein L7ae/L30e, putative
PF3D7_0419900	878022	893866	15108	+	6	32265	2.13562	phosphatidylinositol 4-kinase, putative
PF3D7_0420300	917990	928411	10422	+	1	33513	3.2156	AP2 domain transcription factor, putative
PF3D7_0420600	932463	934244	1782	+	1	3978	2.23232	conserved Plasmodium protein, unknown function
PF3D7_0422400	1026648	1027399	513	+	2	5356	10.4405	40S ribosomal protein S19
PF3D7_0423000	1047696	1048478	783	+	1	1858	2.37292	conserved Plasmodium protein, unknown function
PF3D7_0423100	1049270	1049894	441	-	2	1663	3.77098	AP-4 complex subunit sigma, putative
PF3D7_0423300	1051576	1053006	1431	-	1	6241	4.36129	conserved Plasmodium protein, unknown function
PF3D7_0423400	1055665	1056318	654	+	1	2963	4.53058	apical asparagine-rich protein AARP
PF3D7_0423500	1058997	1060551	1119	+	2	5481	4.89812	glideosome associated protein with multiple membrane spans 2
PF3D7_0423700	1071435	1071845	411	-	1	3757	9.14112	early transcribed membrane protein 4
PF3D7_0423800	1076347	1077534	1089	+	2	2894	2.65748	cysteine-rich protective antigen
PF3D7_0423900	1077926	1078488	423	-	2	1711	4.04492	probable protein, unknown function
PF3D7_0424100	1082363	1084150	1581	-	2	15720	9.94307	reticulocyte binding protein homologue 5
PF3D7_0424200	1085979	1091277	5151	-	2	13893	2.69715	reticulocyte binding protein homologue 4
PF3D7_0424600	1113345	1114486	930	-	2	12421	13.3559	Plasmodium exported protein (PHISTb), unknown function
PF3D7_0424900	1127779	1128802	852	+	2	1967	2.30869	Plasmodium exported protein (PHISTa), unknown function
PF3D7_0425100	1134415	1135175	618	-	2	1660	2.68608	Plasmodium exported protein (hyp6), unknown function
PF3D7_0500800	43327	47761	4305	-	2	38677	8.9842	mature parasite-infected erythrocyte surface antigen
PF3D7_0501000	55841	56872	783	+	2	4116	5.2567	Plasmodium exported protein, unknown function
PF3D7_0501100.1	58037	59726	1209	-	4	4143	3.4268	heat shock protein 40, type II
PF3D7_0501100.2	58037	59726	1173	-	4	4035	3.4399	heat shock protein 40, type II
PF3D7_0501200	64065	65489	1227	+	2	2833	2.30888	parasite-infected erythrocyte surface protein
PF3D7_0501300	68930	70113	1014	+	2	6536	6.44576	skeleton-binding protein 1
PF3D7_0501400	74509	79842	5163	+	2	16243	3.14604	interspersed repeat antigen
PF3D7_0501500	81134	82336	1203	-	1	8849	7.35578	rhoptry-associated protein 3
PF3D7_0501600	84041	85237	1197	-	1	25772	21.5305	rhoptry-associated protein 2
PF3D7_0502900	123332	123904	249	-	3	499	2.00402	Tim10/DDP family zinc finger protein, putative
PF3D7_0503000	125116	126514	789	+	5	2073	2.62738	50S ribosomal protein L28, apicoplast, putative
PF3D7_0503300	135004	135930	927	-	1	2813	3.03452	serine/arginine-rich splicing factor 12
PF3D7_0503400	140710	141471	369	+	2	9462	25.6423	actin-depolymerizing factor 1
PF3D7_0503800	151422	152384	363	-	3	3127	8.61433	60S ribosomal protein L31
PF3D7_0505800	252047	252606	303	-	2	3512	11.5908	small ubiquitin-related modifier
PF3D7_0506900	288776	291055	2280	-	1	14433	6.33026	rhomboid protease ROM4
PF3D7_0507100	294668	295903	1236	-	1	15068	12.1909	60S ribosomal protein L4
PF3D7_0507200	298427	300736	2310	-	1	4850	2.09957	subtilisin-like protease 3
PF3D7_0507300	301930	304611	2682	-	1	6337	2.36279	PIMMS2 protein, putative
PF3D7_0507400	305961	306422	462	-	1	1006	2.17749	conserved Plasmodium protein, unknown function
PF3D7_0507500	307490	309556	2067	-	1	9036	4.37155	subtilisin-like protease 1
PF3D7_0508000	328666	329715	1050	-	1	4173	3.97429	6-cysteine protein
PF3D7_0508600	356222	357010	789	+	1	1947	2.46768	conserved Plasmodium protein, unknown function
PF3D7_0508800	363588	364442	855	-	1	1907	2.23041	single-stranded DNA-binding protein
PF3D7_0508900	367022	376426	9405	+	1	25061	2.66465	conserved Plasmodium protein, unknown function
PF3D7_0509300	388696	389191	348	-	2	698	2.00575	conserved Plasmodium protein, unknown function
PF3D7_0509800	410268	415308	4680	+	4	9964	2.12906	phosphatidylinositol 4-kinase
PF3D7_0510100	422746	430353	7608	-	1	21512	2.82755	conserved Plasmodium protein, unknown function
PF3D7_0510900	465782	465939	158	+	1	382	2.41772	small nucleolar RNA snoR04
PF3D7_0511000	467585	468100	516	-	1	3014	5.84109	translationally-controlled tumor protein homolog
PF3D7_0511200	471055	474058	2850	+	2	6749	2.36807	stearoyl-CoA desaturase
PF3D7_0511500	486602	516787	30186	+	1	72618	2.40568	RNA pseudouridylate synthase, putative
PF3D7_0511600	517259	517885	627	-	1	2933	4.67783	apical rhoptry neck protein
PF3D7_0511800	520720	522693	1815	-	2	3857	2.12507	inositol-3-phosphate synthase
PF3D7_0513100	557039	558012	756	-	3	1819	2.40608	conserved Plasmodium protein, unknown function
PF3D7_0513300	569182	569919	738	-	1	3591	4.86585	purine nucleoside phosphorylase
PF3D7_0513600	574941	578505	3342	-	2	7430	2.22322	deoxyribodipyrimidine photo-lyase, putative
PF3D7_0515400	637354	640381	2286	+	6	5601	2.45013	conserved Plasmodium protein, unknown function
PF3D7_0515700	653966	655336	1371	-	1	21116	15.4019	glideosome-associated protein 40, putative
PF3D7_0516200	675809	676614	456	-	3	3116	6.83333	40S ribosomal protein S11
PF3D7_0516900	712762	713772	783	-	2	7118	9.09068	60S ribosomal protein L2
PF3D7_0517000	715765	716675	498	-	2	4548	9.13253	60S ribosomal protein L12, putative
PF3D7_0517300	724681	725751	897	-	2	3575	3.98551	serine/arginine-rich splicing factor 1
PF3D7_0518200	758503	758898	396	-	1	1648	4.16162	SWIB/MDM2 domain-containing protein
PF3D7_0518300	759831	760998	723	-	4	3189	4.41079	proteasome subunit beta type-1, putative
PF3D7_0519200	791719	792936	498	-	5	4882	9.80321	V-type proton ATPase 16 kDa proteolipid subunit
PF3D7_0519400	798036	798775	402	-	2	8217	20.4403	40S ribosomal protein S24
PF3D7_0519700	817066	819139	579	+	3	4318	7.45769	FoP domain-containing protein, putative
PF3D7_0520000	828953	829883	570	+	3	5353	9.39123	40S ribosomal protein S9, putative
PF3D7_0520900	857038	858477	1440	+	1	6224	4.32222	adenosylhomocysteinase
PF3D7_0522000	896018	896940	324	+	4	880	2.71605	conserved Plasmodium protein, unknown function
PF3D7_0522200	901414	902173	351	+	4	848	2.41595	transcription initiation factor TFIID subunit 10, putative
PF3D7_0523400	973518	975876	1602	+	4	3618	2.25843	DnaJ protein, putative
PF3D7_0523900	993433	994607	612	-	3	1641	2.68137	conserved Plasmodium membrane protein, unknown function
PF3D7_0524000	998753	1002124	3372	+	1	11222	3.328	karyopherin beta
PF3D7_0524500	1016198	1016569	372	+	1	1290	3.46774	conserved Plasmodium protein, unknown function
PF3D7_0524600	1017809	1018582	774	+	1	1926	2.48837	50S ribosomal protein L12, apicoplast, putative
PF3D7_0525700	1068516	1069285	396	+	2	3781	9.54798	conserved Plasmodium protein, unknown function
PF3D7_0525800	1071247	1072149	903	+	1	22450	24.8616	inner membrane complex protein 1g, putative
PF3D7_0526900	1123610	1124595	645	+	4	2157	3.34419	transmembrane emp24 domain-containing protein, putative
PF3D7_0527100	1129959	1130754	459	-	4	2082	4.53595	ubiquitin-conjugating enzyme E2 N, putative
PF3D7_0527200	1132937	1134854	1818	-	2	5982	3.29043	ubiquitin carboxyl-terminal hydrolase 14
PF3D7_0527400	1140627	1141154	528	+	1	1595	3.02083	conserved Plasmodium protein, unknown function
PF3D7_0527500	1143618	1145359	1377	+	2	7501	5.44735	Hsc70-interacting protein
PF3D7_0527600	1145857	1148810	1368	-	11	3205	2.34284	conserved Plasmodium protein, unknown function
PF3D7_0528000	1156205	1156579	375	-	1	1846	4.92267	proteasome maturation factor UMP1, putative
PF3D7_0528200	1163408	1165072	1554	-	2	5679	3.65444	eukaryotic translation initiation factor 3 subunit E, putative
PF3D7_0528400	1171659	1173890	1221	+	8	5156	4.22277	palmitoyltransferase DHHC7
PF3D7_0528600	1176969	1177286	318	-	1	1008	3.16981	conserved Plasmodium protein, unknown function
PF3D7_0529400.1	1199165	1205187	4749	+	9	12898	2.71594	conserved Plasmodium protein, unknown function
PF3D7_0529400.2	1199165	1205187	4509	+	10	11591	2.57064	conserved Plasmodium protein, unknown function
PF3D7_0529900	1220777	1221992	855	-	3	5625	6.57895	RING zinc finger protein, putative
PF3D7_0530000	1224598	1224891	294	-	1	647	2.20068	conserved Plasmodium protein, unknown function
PF3D7_0530100	1226883	1227757	678	+	2	1971	2.90708	SNARE protein, putative
PF3D7_0531500	1288559	1289308	750	+	1	2291	3.05467	unspecified product
PF3D7_0531600	1289601	1291692	2092	+	1	18157	8.67925	18S ribosomal RNA
PF3D7_0531800	1292052	1292210	159	+	1	1109	6.97484	5.8S ribosomal RNA
PF3D7_0532000	1292410	1296199	3790	+	1	1078701	284.618	28S ribosomal RNA
PF3D7_0532100	1301224	1301769	546	+	1	12665	23.196	early transcribed membrane protein 5
PF3D7_0532300	1308278	1309940	1530	+	2	3534	2.3098	Plasmodium exported protein (PHISTb), unknown function
PF3D7_0601600	68833	69693	861	-	1	1821	2.11498	tetratricopeptide repeat protein, putative
PF3D7_0601900	78190	78784	387	+	2	840	2.17054	conserved Plasmodium protein, unknown function
PF3D7_0604100	171301	177240	5940	-	1	13149	2.21364	AP2 domain transcription factor
PF3D7_0604500	189012	198078	8625	+	4	25439	2.94945	conserved Plasmodium protein, unknown function
PF3D7_0605900	247640	249166	882	+	5	1931	2.18934	long chain polyunsaturated fatty acid elongation enzyme, putative
PF3D7_0606000	250612	253803	3192	-	1	6547	2.05107	conserved Plasmodium protein, unknown function
PF3D7_0606200	261031	261945	468	-	4	1063	2.27137	ubiquitin-conjugating enzyme E2, putative
PF3D7_0606300	262826	263194	369	+	1	804	2.17886	conserved Plasmodium protein, unknown function
PF3D7_0607000	293864	296797	2934	+	1	8727	2.97444	translation initiation factor IF-2, putative
PF3D7_0608400	349946	350515	321	-	2	923	2.87539	conserved Plasmodium protein, unknown function
PF3D7_0608500	351780	352775	708	-	2	2218	3.13277	proteasome subunit alpha type-2, putative
PF3D7_0608800	362635	363879	1245	+	1	6637	5.33092	ornithine aminotransferase
PF3D7_0609700	413652	419781	5706	+	3	12550	2.19944	conserved Plasmodium protein, unknown function
PF3D7_0609800	421157	422622	855	-	4	4166	4.87251	palmitoyltransferase DHHC2, putative
PF3D7_0610400	444747	445157	411	+	1	221497	538.922	histone H3
PF3D7_0611600	485114	487066	1953	-	1	5761	2.94982	basal complex transmembrane protein 1
PF3D7_0611700	488579	489287	156	-	3	1381	8.85256	60S ribosomal protein L39
PF3D7_0612700	525987	527030	1044	-	1	7339	7.02969	6-cysteine protein
PF3D7_0613100	537778	538585	237	+	4	916	3.86498	conserved Plasmodium protein, unknown function
PF3D7_0613300	540077	544798	4269	-	4	12312	2.88405	rhoptry protein ROP14
PF3D7_0613400	546964	547741	642	+	2	2663	4.14798	50S ribosomal protein L18, apicoplast, putative
PF3D7_0613800	566139	578993	12330	+	3	37723	3.05945	AP2 domain transcription factor, putative
PF3D7_0613900	579435	585896	6462	-	1	24198	3.74466	myosin E, putative
PF3D7_0614000	587019	588635	1617	-	1	3677	2.27396	thiamine-phosphate synthase, putative
PF3D7_0614300	597484	600517	2562	-	4	6399	2.49766	major facilitator superfamily-related transporter, putative
PF3D7_0614500	606142	607259	549	-	3	5137	9.35701	60S ribosomal protein L19
PF3D7_0616200	674118	676375	1776	+	5	3823	2.15259	kinetochore protein NDC80, putative
PF3D7_0616300	676888	677571	684	-	1	1453	2.12427	conserved Plasmodium protein, unknown function
PF3D7_0617200	717050	718917	1341	+	4	6724	5.01417	conserved Plasmodium protein, unknown function
PF3D7_0617800	748416	748814	399	-	1	573136	1436.43	histone H2A
PF3D7_0617900	754395	754805	411	+	1	30463	74.1192	histone H3 variant
PF3D7_0618000	758609	760996	2388	+	1	8359	3.50042	conserved Plasmodium membrane protein, unknown function
PF3D7_0618300	768792	769456	447	+	2	4404	9.85235	60S ribosomal protein L27a, putative
PF3D7_0621200	871297	872202	906	-	1	3346	3.69316	pyridoxine biosynthesis protein PDX1
PF3D7_0621800	891997	892777	555	+	3	4210	7.58559	nascent polypeptide-associated complex subunit alpha, putative
PF3D7_0622900	925105	931074	5970	-	1	15665	2.62395	AP2 domain transcription factor AP2Tel
PF3D7_0623300	947493	948644	711	-	4	1562	2.19691	EGF-like membrane protein, putative
PF3D7_0623800	963741	970955	7215	-	1	25200	3.49272	tyrosine kinase-like protein, putative
PF3D7_0624500	994284	994553	270	+	1	2126	7.87407	anaphase-promoting complex subunit 11, putative
PF3D7_0624600	999524	1007683	8160	+	1	29859	3.65919	SNF2 helicase, putative
PF3D7_0625400	1032536	1033774	1239	-	1	2979	2.40436	conserved Plasmodium protein, unknown function
PF3D7_0626800	1078995	1081320	1536	+	3	11444	7.45052	pyruvate kinase
PF3D7_0627300	1097300	1098649	1350	-	1	4147	3.07185	E3 ubiquitin-protein ligase RNF5, putative
PF3D7_0627500	1101734	1102852	570	-	3	2176	3.81754	protein DJ-1
PF3D7_0628300	1170813	1173696	1176	-	12	22331	18.9889	choline/ethanolaminephosphotransferase, putative
PF3D7_0629200	1199853	1200995	1143	-	1	3770	3.29834	DnaJ protein, putative
PF3D7_0629500	1213948	1216005	1821	-	2	3967	2.17847	amino acid transporter, putative
PF3D7_0631000	1295474	1296331	858	+	1	1973	2.29953	tetratricopeptide repeat protein, putative
PF3D7_0701900	79890	82943	2895	-	2	8873	3.06494	Plasmodium exported protein, unknown function
PF3D7_0702000	84797	85674	738	+	2	3103	4.20461	Plasmodium exported protein (hyp12), unknown function
PF3D7_0702200	91867	93141	1275	-	1	2903	2.27686	lysophospholipase, putative
PF3D7_0702400	101694	102285	372	+	2	1204	3.23656	small exported membrane protein 1
PF3D7_0703600	144019	145953	789	+	10	1695	2.14829	conserved Plasmodium protein, unknown function
PF3D7_0703700	146645	147394	750	-	1	1768	2.35733	conserved Plasmodium protein, unknown function
PF3D7_0704100	180036	190715	10680	+	1	28596	2.67753	conserved Plasmodium membrane protein, unknown function
PF3D7_0704300	197691	203249	5559	+	1	12099	2.17647	conserved Plasmodium membrane protein, unknown function
PF3D7_0704600	216024	229072	11682	-	8	26598	2.27684	E3 ubiquitin-protein ligase
PF3D7_0705500	270022	278706	8445	-	2	20363	2.41125	inositol-phosphate phosphatase, putative
PF3D7_0705700	285472	286166	165	-	3	981	5.94545	40S ribosomal protein S29, putative
PF3D7_0705900	290100	291220	501	-	4	1813	3.61876	ATP synthase subunit C, putative
PF3D7_0706000	293400	297089	3690	+	1	8537	2.31355	importin-7, putative
PF3D7_0706300	305563	306032	357	+	2	2617	7.33053	conserved Plasmodium protein, unknown function
PF3D7_0706400	306855	307133	279	-	1	4198	15.0466	60S ribosomal protein L37
PF3D7_0707300	338885	342083	2586	+	5	75133	29.0538	rhoptry-associated membrane antigen
PF3D7_0707500	348277	353082	4806	+	1	11140	2.31794	conserved Plasmodium protein, unknown function
PF3D7_0707700	357700	360585	2886	+	1	7701	2.6684	E3 ubiquitin-protein ligase, putative
PF3D7_0707900	366929	367708	780	+	1	2229	2.85769	ribosomal protein S8e, putative
PF3D7_0708400	381592	384614	2238	+	2	29808	13.319	heat shock protein 90
PF3D7_0708800	395711	398332	2622	+	1	8496	3.24027	heat shock protein 110
PF3D7_0709050	406820	407448	629	-	1	11091	17.6328	small nucleolar RNA
PF3D7_0709800	437900	438094	195	+	1	540	2.76923	conserved protein, unknown function
PF3D7_0710200	463105	471837	8733	+	1	18025	2.06401	conserved Plasmodium protein, unknown function
PF3D7_0710600	478468	479138	453	-	2	4202	9.27594	60S ribosomal protein L34
PF3D7_0710700	481369	481974	606	-	1	1228	2.0264	conserved Plasmodium protein, unknown function
PF3D7_0711100	492519	493232	714	-	1	1454	2.03641	conserved Plasmodium membrane protein, unknown function
PF3D7_0713700	621463	623521	630	-	9	1465	2.3254	conserved Plasmodium protein, unknown function
PF3D7_0713800	624379	625300	723	-	2	2160	2.98755	negative elongation factor A, putative
PF3D7_0714000	643101	643472	372	-	1	15735	42.2984	histone H2B variant
PF3D7_0715800	695600	696904	1305	-	1	2732	2.09349	drug/metabolite transporter DMT1, putative
PF3D7_0716300	717281	718968	1569	+	2	11908	7.58955	conserved Plasmodium protein, unknown function
PF3D7_0716800	732070	733496	984	-	3	2724	2.76829	eukaryotic translation initiation factor 3 subunit I, putative
PF3D7_0717200	745191	746663	1296	-	2	5009	3.86497	conserved Plasmodium protein, unknown function
PF3D7_0717300	748990	750699	1179	+	4	2368	2.00848	transcription initiation factor IIE subunit alpha, putative
PF3D7_0717500	755763	757696	1587	+	2	4237	2.66982	calcium-dependent protein kinase 4
PF3D7_0717700	764794	766413	1620	-	1	4224	2.60741	serine--tRNA ligase, putative
PF3D7_0718400	822438	823015	390	+	2	1590	4.07692	mitochondrial ribosomal protein S8 precursor, putative
PF3D7_0718500	824445	825884	579	+	6	1445	2.49568	prefoldin subunit 3, putative
PF3D7_0719500	854652	856654	1416	-	3	3377	2.38489	LEM3/CDC50 family protein, putative
PF3D7_0719600	858742	859492	522	-	2	3933	7.53448	60S ribosomal protein L11a, putative
PF3D7_0719700	861583	862487	414	+	3	5151	12.442	40S ribosomal protein S10, putative
PF3D7_0720700	891683	899051	6501	+	4	19375	2.98031	phosphoinositide-binding protein, putative
PF3D7_0721100	916434	917168	735	+	1	5599	7.61769	conserved Plasmodium protein, unknown function
PF3D7_0721600	931459	932164	588	-	2	6504	11.0612	40S ribosomal protein S5, putative
PF3D7_0721800	938279	938895	321	+	3	782	2.43614	conserved Plasmodium protein, unknown function
PF3D7_0721900	939715	940250	237	-	3	490	2.06751	V-type ATPase V0 subunit e, putative
PF3D7_0722000	941776	942513	738	+	1	1588	2.15176	conserved Plasmodium protein, unknown function
PF3D7_0722200	946363	948612	2250	+	1	33565	14.9178	rhoptry-associated leucine zipper-like protein 1
PF3D7_0723800	993232	1000233	6573	+	4	15893	2.41792	conserved Plasmodium protein, unknown function
PF3D7_0725400	1079015	1080055	330	+	4	13492	40.8848	conserved Plasmodium protein, unknown function
PF3D7_0725600	1083761	1085847	2087	+	1	18454	8.84236	18S ribosomal RNA
PF3D7_0725800	1086213	1086371	159	+	1	1111	6.98742	5.8S ribosomal RNA
PF3D7_0726000	1086570	1090357	3788	+	1	1097237	289.661	28S ribosomal RNA
PF3D7_0727400	1162710	1163831	771	+	3	2326	3.01686	proteasome subunit alpha type-5, putative
PF3D7_0728000	1191179	1192289	990	-	2	2589	2.61515	eukaryotic translation initiation factor 2 subunit alpha, putative
PF3D7_0728400.1	1215174	1215763	381	+	2	1289	3.3832	conserved Plasmodium protein, unknown function
PF3D7_0728400.2	1215174	1215763	381	+	2	1283	3.36745	conserved Plasmodium protein, unknown function
PF3D7_0730300	1297459	1301454	3996	+	1	18197	4.5538	AP2 domain transcription factor AP2-L, putative
PF3D7_0730400	1304347	1305096	477	+	3	2295	4.81132	IMP1-like protein, putative
PF3D7_0730800.1	1321306	1322367	882	+	2	10325	11.7063	Plasmodium exported protein, unknown function, unspecified product
PF3D7_0730800.2	1321306	1322367	882	+	2	10325	11.7063	Plasmodium exported protein, unknown function, unspecified product
PF3D7_0731000	1333175	1334938	1764	-	1	9114	5.16667	unspecified product
PF3D7_0731100	1338959	1341790	2673	+	2	6681	2.49944	EMP1-trafficking protein
PF3D7_0731200	1342842	1343996	930	-	2	2496	2.68387	Plasmodium exported protein, unknown function
PF3D7_0731300	1350032	1351149	954	+	2	4687	4.913	Plasmodium exported protein (PHISTb), unknown function
PF3D7_0731400	1353758	1355482	1605	+	2	9633	6.00187	serine/threonine protein kinase, FIKK family, pseudogene
PF3D7_0731500	1358055	1362929	4509	+	4	47916	10.6267	erythrocyte binding antigen-175
PF3D7_0731600	1368161	1370596	2436	+	1	7857	3.22537	acyl-CoA synthetase
PF3D7_0801800	119032	122067	3036	-	1	7021	2.31258	mannose-6-phosphate isomerase, putative
PF3D7_0802000	146089	150282	4194	+	1	9051	2.15808	glutamate dehydrogenase, putative
PF3D7_0802100	151808	159668	7734	-	2	15938	2.06077	AP2 domain transcription factor, putative
PF3D7_0802200	165416	166078	663	+	1	2697	4.06787	1-cys peroxiredoxin
PF3D7_0802600	180563	188113	6840	+	5	13812	2.0193	adenylyl cyclase beta
PF3D7_0803200	204241	206661	2187	-	2	8568	3.9177	filament assembling protein, putative
PF3D7_0803800	233467	234426	798	-	2	5625	7.04887	proteasome subunit beta type-4
PF3D7_0803900	236442	236571	130	-	1	4243	32.6385	C/D small nucleolar RNA
PF3D7_0804000	237853	241048	2409	+	3	7774	3.22707	cactin homolog, putative
PF3D7_0804800	278381	279034	654	+	1	1320	2.01835	peptidyl-prolyl cis-trans isomerase
PF3D7_0805200	290902	291183	282	+	1	3285	11.6489	gamete release protein, putative
PF3D7_0805300	293113	296871	3759	-	1	9225	2.45411	conserved Plasmodium protein, unknown function
PF3D7_0805600	312034	312960	927	+	1	5222	5.63323	PAP2-like protein, putative
PF3D7_0806800	363260	366421	3162	-	1	18916	5.98229	V-type proton ATPase subunit a, putative
PF3D7_0807300	381564	382847	606	+	4	1462	2.41254	ras-related protein Rab-18
PF3D7_0807400	384298	385797	576	+	5	1176	2.04167	coenzyme Q-binding protein COQ10 homolog, mitochondrial
PF3D7_0807500	387219	388364	783	+	3	4436	5.66539	proteasome subunit alpha type-6, putative
PF3D7_0807800	399591	401360	1446	-	2	3524	2.43707	26S proteasome regulatory subunit RPN10, putative
PF3D7_0807900	402595	404141	1122	+	3	2391	2.13102	tyrosine--tRNA ligase
PF3D7_0808200	416344	418065	1722	-	1	7611	4.41986	plasmepsin X
PF3D7_0808300	421493	422640	717	+	3	3805	5.30683	ubiquitin regulatory protein, putative
PF3D7_0808400	423527	424536	837	+	2	2460	2.93907	coatomer subunit epsilon, putative
PF3D7_0809300	474253	475285	1033	-	1	3556	3.4424	unspecified product
PF3D7_0810000	517421	517693	273	-	1	1055	3.86447	acyl-CoA binding protein, putative
PF3D7_0810300	525058	527604	1653	-	4	13601	8.22807	protein phosphatase PPM5, putative
PF3D7_0810900.1	551199	552428	1038	-	2	3358	3.23507	conserved Plasmodium protein, unknown function
PF3D7_0810900.2	551867	552428	366	-	2	1371	3.7459	conserved Plasmodium protein, unknown function
PF3D7_0811300	567824	573148	5325	+	1	15537	2.91775	CCR4-associated factor 1
PF3D7_0812400	621805	623442	1638	-	1	3301	2.01526	karyopherin alpha
PF3D7_0813000	643086	644885	1800	-	1	6420	3.56667	conserved Plasmodium protein, unknown function
PF3D7_0813300	656078	657630	948	+	2	4741	5.00105	conserved Plasmodium protein, unknown function
PF3D7_0813900	677989	678725	435	-	2	3477	7.9931	40S ribosomal protein S16, putative
PF3D7_0814000	680957	681809	648	+	2	10741	16.5756	60S ribosomal protein L13-2, putative
PF3D7_0814200	687340	688086	747	+	1	17191	23.0134	DNA/RNA-binding protein Alba 1
PF3D7_0814900	708228	708824	597	+	1	1533	2.56784	superoxide dismutase [Fe]
PF3D7_0815600	729917	732187	807	-	10	3546	4.39405	eukaryotic translation initiation factor 3 subunit G, putative
PF3D7_0815800	735680	741181	5502	-	1	15422	2.80298	vacuolar protein sorting-associated protein 9, putative
PF3D7_0817500	798777	800205	558	+	6	3565	6.38889	protein kinase c inhibitor-like protein, putative
PF3D7_0817600	800920	804034	2889	-	2	10120	3.50294	conserved Plasmodium protein, unknown function
PF3D7_0817800	815150	815451	165	+	2	573	3.47273	conserved Plasmodium protein, unknown function
PF3D7_0817900	816803	817102	300	-	1	14276	47.5867	high mobility group protein B2
PF3D7_0818100	824564	826518	1617	+	2	4475	2.76747	zinc finger protein, putative
PF3D7_0818200	830006	831454	789	+	4	11681	14.8048	14-3-3 protein
PF3D7_0818400	835978	836848	597	-	2	1976	3.30988	rRNA-processing protein FCF1, putative
PF3D7_0818500	842317	843215	576	+	2	10604	18.4097	zinc finger protein, putative
PF3D7_0818700	848277	852947	3672	-	5	7722	2.10294	DNA helicase, putative
PF3D7_0818900	860384	862417	2034	+	1	40138	19.7335	heat shock protein 70
PF3D7_0819600	885198	886136	834	-	2	3765	4.51439	conserved Plasmodium protein, unknown function
PF3D7_0820300	919055	920896	1842	+	1	7317	3.97231	conserved Plasmodium protein, unknown function
PF3D7_0821400	965822	966657	375	+	2	3736	9.96267	conserved Plasmodium protein, unknown function
PF3D7_0821700	973586	974267	420	+	3	3679	8.75952	60S ribosomal protein L22, putative
PF3D7_0821800	976074	976644	243	+	3	1932	7.95062	protein transport protein SEC61 subunit beta, putative
PF3D7_0822900	1007777	1011307	3531	-	1	26029	7.37157	conserved Plasmodium protein, unknown function
PF3D7_0823200	1022629	1023846	861	-	3	2464	2.86179	RNA-binding protein, putative
PF3D7_0823700	1041832	1042327	201	-	2	529	2.63184	mitochondrial import receptor subunit TOM7, putative
PF3D7_0824400	1062304	1064061	1758	-	1	3856	2.1934	nucleoside transporter 2
PF3D7_0825300	1095116	1095562	447	-	1	904	2.02237	SAYSvFN domain-containing protein, putative
PF3D7_0826700	1160164	1161708	972	-	2	10723	11.0319	receptor for activated c kinase
PF3D7_0827900	1206788	1208394	1452	-	2	19667	13.5448	protein disulfide isomerase
PF3D7_0828800	1237285	1239501	2217	-	1	8097	3.65223	GPI-anchored micronemal antigen
PF3D7_0828900	1241966	1242895	558	-	4	3276	5.87097	conserved Plasmodium protein, unknown function
PF3D7_0829900	1275625	1278795	3171	+	1	38877	12.2602	unspecified product
PF3D7_0830200	1284578	1287755	3178	+	1	12089	3.80396	28S ribosomal RNA
PF3D7_0830400	1294022	1294722	414	+	2	6467	15.6208	CRA domain-containing protein, putative
PF3D7_0830500	1296134	1298328	2028	-	2	11221	5.53304	sporozoite and liver stage tryptophan-rich protein, putative
PF3D7_0831500	1353456	1354669	1008	+	2	5039	4.99901	Plasmodium exported protein (PHIST), unknown function
PF3D7_0831700	1365467	1367506	2040	-	1	10651	5.22108	heat shock protein 70
PF3D7_0831800	1374236	1375299	918	-	2	11415	12.4346	histidine-rich protein II
PF3D7_0903200	133762	135587	621	-	7	3212	5.1723	ras-related protein RAB7
PF3D7_0903300	140977	150588	9612	+	1	22958	2.38847	conserved Plasmodium membrane protein, unknown function
PF3D7_0903600.1	168493	172887	2283	+	17	6919	3.03066	conserved Plasmodium protein, unknown function, unspecified product
PF3D7_0903700	175542	177442	1362	+	3	5289	3.88326	alpha tubulin 1
PF3D7_0903900	185821	186383	396	+	2	5776	14.5859	60S ribosomal protein L32
PF3D7_0904000	187342	188622	1281	-	1	2878	2.24668	GTPase-activating protein, putative
PF3D7_0904400	208168	208725	558	-	1	1565	2.80466	signal peptidase complex subunit 3, putative
PF3D7_0904700	218675	219462	570	-	2	1440	2.52632	bacterial histone-like protein
PF3D7_0905400	270740	274789	2694	-	7	64628	23.9896	high molecular weight rhoptry protein 3
PF3D7_0905500	278369	279088	720	+	1	4044	5.61667	conserved Plasmodium protein, unknown function
PF3D7_0906600	320811	323342	2532	-	1	5354	2.11453	zinc finger protein, putative
PF3D7_0907000	337564	337920	243	+	2	840	3.45679	conserved Plasmodium protein, unknown function
PF3D7_0907400	351955	354723	2769	-	1	8419	3.04045	ATP-dependent protease ATPase subunit ClpY
PF3D7_0907700	364069	364908	840	-	1	2551	3.0369	proteasome activator 28 subunit beta, putative
PF3D7_0907800	366925	367500	576	+	1	2888	5.01389	ribosomal protein L35, apicoplast, putative
PF3D7_0907900	367865	368789	726	-	2	1810	2.49311	peptide deformylase
PF3D7_0908400	388149	388736	588	+	1	2005	3.40986	conserved Plasmodium protein, unknown function
PF3D7_0910300	475671	476969	1299	+	1	3414	2.62818	conserved Plasmodium protein, unknown function
PF3D7_0911000	500183	502733	879	+	13	6110	6.95108	phosphatidylinositol N-acetylglucosaminyltransferase, putative
PF3D7_0911100	504412	508130	3498	+	2	13937	3.98428	conserved Plasmodium protein, unknown function
PF3D7_0911800	535851	536681	831	-	1	2574	3.09747	conserved Plasmodium protein, unknown function
PF3D7_0911900	538221	539872	1242	-	2	5217	4.20048	falstatin
PF3D7_0912400	551426	553167	1341	-	2	2903	2.1648	alkaline phosphatase, putative
PF3D7_0912900	567283	568640	1017	+	2	3087	3.0354	26S proteasome regulatory subunit RPN8, putative
PF3D7_0913200	575679	576509	831	+	1	5852	7.04212	elongation factor 1-beta
PF3D7_0913800	593107	593556	261	+	2	2577	9.87356	conserved Plasmodium protein, unknown function
PF3D7_0914100	601076	604576	3501	-	1	8322	2.37704	conserved Plasmodium protein, unknown function
PF3D7_0914400	617963	619835	750	+	6	1744	2.32533	conserved Plasmodium protein, unknown function
PF3D7_0914600	627754	628319	336	+	2	1110	3.30357	transcription elongation factor 1, putative
PF3D7_0915900	665978	666478	501	+	1	1138	2.27146	conserved Plasmodium protein, unknown function
PF3D7_0916000	667255	671725	4140	-	4	10220	2.4686	major facilitator superfamily domain-containing protein, putative
PF3D7_0916700	696863	698029	1167	-	1	3770	3.23051	RNA-binding protein musashi, putative
PF3D7_0916800	703368	703517	150	+	1	633	4.22	conserved Plasmodium protein, unknown function
PF3D7_0916900	705357	706355	999	+	1	4393	4.3974	zinc finger protein, putative
PF3D7_0917900	737985	740276	1959	+	2	28496	14.5462	heat shock protein 70
PF3D7_0918000	742494	743684	1191	-	1	25894	21.7414	glideosome-associated protein 50
PF3D7_0918100	747173	748490	393	+	6	1162	2.95674	cytochrome b5-like heme/steroid binding protein, putative
PF3D7_0918200	748678	750262	954	-	5	4031	4.22537	50S ribosomal protein L3, apicoplast, putative
PF3D7_0918500	761211	763358	2148	+	1	19518	9.08659	telomerase RNA
PF3D7_0918700	769452	772105	2214	+	4	5455	2.46387	conserved Plasmodium protein, unknown function
PF3D7_0919000	781368	782675	810	-	3	4685	5.78395	nucleosome assembly protein
PF3D7_0919100	786156	788212	1113	+	5	5723	5.14196	DnaJ protein, putative
PF3D7_0919200	789514	790478	753	-	2	2775	3.68526	PPPDE peptidase, putative
PF3D7_0919900	809659	819804	10146	-	1	28970	2.85531	regulator of chromosome condensation, putative
PF3D7_0920500	841536	842655	576	+	5	5272	9.15278	ADP-ribosylation factor, putative
PF3D7_0920700	849515	851296	1782	+	1	7142	4.00786	CRAL/TRIO domain-containing protein, putative
PF3D7_0920900	855516	857286	1443	+	2	3003	2.08108	U4/U6 snRNA-associated-splicing factor, putative
PF3D7_0921700	883515	885592	1710	-	3	3645	2.13158	conserved Plasmodium protein, unknown function
PF3D7_0921900	888559	889305	747	+	1	1821	2.43775	conserved Plasmodium protein, unknown function
PF3D7_0922200	903362	904570	1209	+	1	21594	17.861	S-adenosylmethionine synthetase
PF3D7_0923900	966795	968069	609	-	6	2606	4.27915	RNA-binding protein, putative
PF3D7_0924000	972548	976637	3879	+	2	13541	3.49085	patatin-like phospholipase, putative
PF3D7_0924400	988977	992915	3738	+	2	14064	3.76244	conserved Plasmodium protein, unknown function
PF3D7_0925900	1040713	1041516	654	+	2	12531	19.1606	conserved Plasmodium protein, unknown function
PF3D7_0926200	1063053	1063208	156	+	1	1119	7.17308	conserved Plasmodium protein, unknown function
PF3D7_0927500	1120100	1121331	339	-	5	2177	6.42183	dynein light chain, putative
PF3D7_0927600	1123861	1125858	1788	+	2	7956	4.44966	RNA-binding protein, putative
PF3D7_0927900	1131074	1132135	1062	-	1	3159	2.97458	phosphatidylserine decarboxylase
PF3D7_0928000.1	1135545	1136391	312	+	4	1831	5.86859	cytochrome c oxidase subunit 6B, putative
PF3D7_0928000.2	1135545	1136391	252	+	4	1541	6.11508	cytochrome c oxidase subunit 6B, putative
PF3D7_0928600	1148161	1148502	342	-	1	871	2.54678	conserved Plasmodium protein, unknown function
PF3D7_0929200	1167842	1169577	870	+	6	2513	2.88851	RNA-binding protein, putative
PF3D7_0929400	1175203	1180762	4137	+	10	18623	4.50157	high molecular weight rhoptry protein 2
PF3D7_0929500	1180983	1181996	630	-	3	10329	16.3952	conserved protein, unknown function
PF3D7_0930200	1195693	1198462	1920	-	5	10699	5.5724	leucine-rich repeat protein
PF3D7_0930300	1201812	1206974	5163	+	1	250669	48.551	merozoite surface protein 1
PF3D7_0930400.1	1207974	1211703	2748	+	8	9202	3.34862	zinc finger protein, putative
PF3D7_0930400.2	1207974	1211703	2748	+	8	9199	3.34753	zinc finger protein, putative
PF3D7_0930500	1212169	1216500	4083	-	2	14898	3.64879	diacylglycerol kinase, putative
PF3D7_0931100	1254815	1257292	2478	+	1	9385	3.78733	nucleolar protein Nop52, putative
PF3D7_0931400	1263347	1264830	933	+	4	2375	2.54555	PUB domain-containing protein, putative
PF3D7_0931500	1264999	1266015	660	-	3	3908	5.92121	conserved Plasmodium protein, unknown function
PF3D7_0931800	1273082	1273930	849	-	1	3329	3.92108	proteasome subunit beta type-6, putative
PF3D7_0932000	1278007	1278896	309	+	5	3353	10.8511	conserved Plasmodium protein, unknown function
PF3D7_0932100	1279219	1283879	3825	-	5	14242	3.7234	protein MAM3, putative
PF3D7_0932200	1287008	1288372	516	+	4	10457	20.2655	profilin
PF3D7_0934500	1350836	1351929	708	-	2	2043	2.88559	V-type proton ATPase subunit E, putative
PF3D7_0934600	1354581	1355495	567	+	3	1948	3.43563	conserved Plasmodium protein, unknown function
PF3D7_0934700	1357411	1359262	1596	+	3	6954	4.35714	UBX domain, putative
PF3D7_0934800	1361935	1363848	1029	+	5	8715	8.46939	cAMP-dependent protein kinase catalytic subunit
PF3D7_0935000	1366569	1367150	582	-	1	2070	3.5567	U2 small nuclear ribonucleoprotein B'', putative
PF3D7_0935100	1367396	1367614	219	-	1	1176	5.36986	protein kish, putative
PF3D7_0935600	1405192	1407022	1539	+	2	6893	4.47888	gametocytogenesis-implicated protein
PF3D7_0935800	1413840	1419754	4023	+	9	8683	2.15834	cytoadherence linked asexual protein 9
PF3D7_0935900	1420483	1422807	2142	-	2	14571	6.80252	ring-exported protein 1
PF3D7_0936000	1427642	1428022	285	-	2	2035	7.14035	ring-exported protein 2
PF3D7_0936100	1430607	1431146	540	-	1	1573	2.91296	early transcribed membrane protein
PF3D7_0936300	1436687	1437981	981	-	2	4756	4.84811	ring-exported protein 3
PF3D7_0936800	1458392	1459862	1152	+	2	4051	3.51649	Plasmodium exported protein (PHISTc), unknown function
PF3D7_1001200	70547	70819	273	-	1	2312	8.46886	acyl-CoA binding protein, isoform 2, ACBP2
PF3D7_1001500	81416	81739	324	-	1	6837	21.1019	early transcribed membrane protein 10.1
PF3D7_1001600	86538	89009	2292	-	2	11413	4.97949	exported lipase 2
PF3D7_1001700	92573	93526	801	-	2	6906	8.62172	Plasmodium exported protein (PHISTc), unknown function
PF3D7_1001800	96113	97031	783	-	2	1712	2.18646	Plasmodium exported protein (PHISTc), unknown function
PF3D7_1002100	106653	108662	1896	-	2	11326	5.97363	EMP1-trafficking protein
PF3D7_1002400.1	121115	123291	747	+	7	2131	2.85274	transformer-2 protein homolog beta, putative
PF3D7_1002400.2	121115	123291	741	+	7	2123	2.86505	transformer-2 protein homolog beta, putative
PF3D7_1002500	123770	124882	564	-	3	1601	2.83865	conserved Plasmodium protein, unknown function
PF3D7_1002900	138765	139853	384	+	5	1491	3.88281	conserved Plasmodium protein, unknown function
PF3D7_1003000	142419	146237	3819	+	1	8378	2.19377	conserved Plasmodium protein, unknown function
PF3D7_1003300	150416	150874	459	-	1	2179	4.74728	N-terminal acetyltransferase A complex catalytic subunit ARD1, putative
PF3D7_1003500	160316	160962	357	-	2	4545	12.7311	40S ribosomal protein S20e, putative
PF3D7_1003600	164945	165790	846	+	1	12479	14.7506	inner membrane complex protein 1c, putative
PF3D7_1004000	179344	180226	609	-	2	4717	7.74548	60S ribosomal protein L13, putative
PF3D7_1004700	220018	221353	804	-	4	1818	2.26119	conserved Plasmodium protein, unknown function
PF3D7_1005800	251579	252490	681	+	2	2197	3.22614	conserved Plasmodium membrane protein, unknown function
PF3D7_1006200	262150	262997	324	-	3	5121	15.8056	DNA/RNA-binding protein Alba 3
PF3D7_1006600	272243	272824	582	-	1	1178	2.02405	phosducin-like protein, putative
PF3D7_1006800	277621	279168	741	+	4	2094	2.82591	single-strand telomeric DNA-binding protein GBP2, putative
PF3D7_1007100	286522	287473	351	-	4	982	2.79772	conserved Plasmodium protein, unknown function
PF3D7_1007400	296906	297565	660	+	1	2550	3.86364	conserved Plasmodium protein, unknown function
PF3D7_1007500	298361	298687	327	+	1	1293	3.95413	conserved Plasmodium protein, unknown function
PF3D7_1008000	321011	328150	7140	+	1	16650	2.33193	histone deacetylase 2
PF3D7_1008400	347206	348667	1347	-	2	6809	5.05494	26S protease regulatory subunit 4, putative
PF3D7_1008700	360625	362480	1338	-	3	5948	4.44544	tubulin beta chain
PF3D7_1008900	369199	370225	729	-	2	1927	2.64335	adenylate kinase
PF3D7_1010300	414732	415328	357	+	3	12714	35.6134	succinate dehydrogenase subunit 4, putative
PF3D7_1010400	415404	417471	1095	-	6	7641	6.97808	conserved Plasmodium protein, unknown function
PF3D7_1010600	420185	421056	669	-	2	3121	4.66517	eukaryotic translation initiation factor 2 subunit beta
PF3D7_1010700	422961	424365	672	+	7	1893	2.81696	dolichyl-phosphate-mannose--protein mannosyltransferase, putative
PF3D7_1011400	441140	441955	816	-	1	2749	3.36887	proteasome subunit beta type-5
PF3D7_1011500	443874	444401	528	-	1	2248	4.25758	conserved Plasmodium membrane protein, unknown function
PF3D7_1011800	455398	458817	3420	+	1	26538	7.75965	PRE-binding protein
PF3D7_1011900	460335	461993	918	-	6	1870	2.03704	heme oxygenase
PF3D7_1012200	470979	471933	804	+	2	8356	10.393	rhoptry associated adhesin
PF3D7_1012300	472546	473386	579	-	2	1572	2.71503	cytochrome b-c1 complex subunit 7, putative
PF3D7_1012400	475327	476563	696	-	3	13181	18.9382	hypoxanthine-guanine phosphoribosyltransferase
PF3D7_1012900	496331	497573	1143	-	2	5175	4.52756	autophagy-related protein 18, putative
PF3D7_1013800	542359	544779	1461	+	5	5670	3.8809	conserved Plasmodium protein, unknown function
PF3D7_1014100	555160	559527	4368	+	1	15032	3.44139	merozoite surface protein MSA180, putative
PF3D7_1014600	581354	589090	7737	-	1	16278	2.10392	transcriptional coactivator ADA2
PF3D7_1014900	600970	607809	6840	-	1	16372	2.39357	conserved Plasmodium protein, unknown function
PF3D7_1015900	637138	639011	1341	+	2	7140	5.32438	enolase
PF3D7_1016300	650898	653567	2475	-	2	37127	15.0008	GBP130 protein
PF3D7_1016800	675293	676417	945	-	2	6606	6.99048	Plasmodium exported protein (PHISTc), unknown function
PF3D7_1016900	682182	682508	327	-	1	6478	19.8104	early transcribed membrane protein 10.3
PF3D7_1017100	689888	690820	933	-	1	4715	5.05359	rhoptry neck protein 12
PF3D7_1017400	697970	699823	735	-	8	2987	4.06395	phosphomannomutase, putative
PF3D7_1017500	701746	702422	405	+	3	4990	12.321	essential light chain ELC
PF3D7_1017900	715878	717437	1404	+	2	3455	2.46083	26S proteasome regulatory subunit p55, putative
PF3D7_1018700	747028	748887	1860	+	1	7577	4.07366	conserved Plasmodium protein, unknown function
PF3D7_1019000	757795	765158	7218	+	2	18216	2.52369	eukaryotic translation initiation factor subunit eIF2A, putative
PF3D7_1019400	786503	787008	327	+	2	2410	7.37003	60S ribosomal protein L30e, putative
PF3D7_1019900	808618	808992	375	-	1	2299	6.13067	autophagy-related protein 8
PF3D7_1020000	811106	813484	969	-	10	2994	3.08978	RNA-binding protein 34, putative
PF3D7_1020900	845086	846192	546	-	5	5810	10.641	ADP-ribosylation factor
PF3D7_1021700	873208	894869	20805	-	5	63877	3.07027	conserved Plasmodium membrane protein, unknown function
PF3D7_1021800	896865	903608	6225	-	4	20986	3.37124	schizont egress antigen-1
PF3D7_1021900	905473	912345	6873	-	1	23742	3.45439	PHAX domain-containing protein, putative
PF3D7_1022400	939938	942234	1617	-	4	3844	2.37724	serine/arginine-rich splicing factor 4
PF3D7_1022700	951752	952579	828	-	1	3992	4.82126	phospholipid scramblase, putative
PF3D7_1023000	961066	962307	1242	-	1	5863	4.72061	conserved Plasmodium membrane protein, unknown function
PF3D7_1023500	987017	987310	294	-	1	938	3.19048	conserved Plasmodium protein, unknown function
PF3D7_1023900	997475	1007461	9987	-	1	40596	4.06488	chromodomain-helicase-DNA-binding protein 1 homolog, putative
PF3D7_1024000	1014896	1016596	1701	+	1	3852	2.26455	conserved Plasmodium protein, unknown function
PF3D7_1024300	1022505	1022897	393	+	1	1128	2.87023	conserved Plasmodium protein, unknown function
PF3D7_1024800	1034685	1039079	4395	+	1	16484	3.75063	exported protein 3
PF3D7_1025000	1045608	1049760	2943	-	7	7692	2.61366	EF-hand calcium-binding domain-containing protein, putative
PF3D7_1025800	1089997	1090538	204	-	3	492	2.41176	conserved Plasmodium protein, unknown function
PF3D7_1025900	1091436	1097277	3996	-	15	8204	2.05305	conserved Plasmodium protein, unknown function
PF3D7_1026000	1098455	1099882	1092	-	3	2767	2.53388	conserved Plasmodium protein, unknown function
PF3D7_1026500	1112423	1112635	213	-	1	436	2.04695	conserved Plasmodium protein, unknown function
PF3D7_1026600	1113495	1118573	5079	-	1	65220	12.8411	conserved Plasmodium protein, unknown function
PF3D7_1026800	1122962	1124037	792	+	2	6544	8.26263	40S ribosomal protein S2
PF3D7_1027300	1140589	1142602	1182	-	3	23031	19.4848	peroxiredoxin
PF3D7_1027800	1153271	1154431	1161	-	1	8555	7.36865	60S ribosomal protein L3
PF3D7_1028700	1181005	1182501	1497	+	1	11717	7.82699	merozoite TRAP-like protein
PF3D7_1028800	1183487	1183995	354	-	2	1567	4.42655	conserved Plasmodium protein, unknown function
PF3D7_1029600	1206302	1207405	1104	+	1	3927	3.55707	adenosine deaminase
PF3D7_1029900	1217348	1222441	5094	+	1	12429	2.43993	conserved Plasmodium protein, unknown function
PF3D7_1030000	1223375	1224167	402	+	4	1113	2.76866	transcription elongation factor SPT4, putative
PF3D7_1030200	1230561	1231913	1353	-	1	4684	3.46194	claudin-like apicomplexan microneme protein, putative
PF3D7_1030300	1233667	1237002	3336	-	1	8631	2.58723	conserved Plasmodium protein, unknown function
PF3D7_1030800	1250045	1250683	639	+	1	2536	3.9687	calmodulin, putative
PF3D7_1031700	1281252	1281989	351	+	4	1008	2.87179	protein phosphatase inhibitor 3
PF3D7_1033100	1324132	1328436	4305	-	1	17996	4.18026	S-adenosylmethionine decarboxylase/ornithine decarboxylase
PF3D7_1033200	1335222	1336289	1068	+	1	3993	3.73876	early transcribed membrane protein 10.2
PF3D7_1033400	1339762	1340628	867	+	1	2471	2.85006	haloacid dehalogenase-like hydrolase
PF3D7_1033900	1354454	1355571	576	-	5	2797	4.8559	ubiquitin-conjugating enzyme E2, putative
PF3D7_1034600	1376827	1377759	933	-	1	3030	3.24759	translation initiation factor IF-3, putative
PF3D7_1035200	1394839	1396596	1758	+	1	52051	29.6081	S-antigen
PF3D7_1035300	1399195	1402896	3702	+	1	12115	3.27256	glutamate-rich protein GLURP
PF3D7_1035400	1404195	1405259	1065	+	1	32933	30.923	merozoite surface protein 3
PF3D7_1035500	1407276	1408391	1116	+	1	21595	19.3504	merozoite surface protein 6
PF3D7_1035700	1413200	1415293	2094	+	1	11193	5.34527	duffy binding-like merozoite surface protein
PF3D7_1035900	1423983	1425683	1701	+	1	14590	8.57731	probable protein, unknown function
PF3D7_1036000	1427127	1428344	1218	+	1	3739	3.06979	merozoite surface protein
PF3D7_1036500	1441901	1443568	1668	+	1	4842	2.90288	probable protein, unknown function
PF3D7_1036900	1452599	1458006	5046	-	3	20967	4.15517	conserved Plasmodium protein, unknown function
PF3D7_1037300	1477940	1478845	906	-	1	3425	3.78035	ADP/ATP transporter on adenylate translocase
PF3D7_1037700	1495973	1496658	318	+	3	898	2.8239	enhancer of rudimentary homolog, putative
PF3D7_1037900	1502955	1504322	549	-	4	1438	2.61931	conserved Plasmodium protein, unknown function
PF3D7_1038000.1	1505835	1506896	360	+	4	15781	43.8361	antigen UB05
PF3D7_1038000.2	1505835	1506896	363	+	4	15781	43.4738	antigen UB05
PF3D7_1102700	128789	129064	276	+	1	21770	78.8768	early transcribed membrane protein 11.1
PF3D7_1102800	131703	131987	285	-	1	87229	306.067	early transcribed membrane protein 11.2
PF3D7_1103100	140048	140801	357	-	2	7750	21.7087	60S acidic ribosomal protein P1, putative
PF3D7_1104100	179461	181128	1044	-	4	2951	2.82663	syntaxin, Qa-SNARE family
PF3D7_1104400	196767	198355	1275	+	2	6854	5.37569	thioredoxin, putative
PF3D7_1104900	214825	219687	4863	+	1	10676	2.19535	calcium/calmodulin-dependent protein kinase, putative
PF3D7_1105000	221818	222129	312	-	1	160827	515.471	histone H4
PF3D7_1105100	226065	226418	354	+	1	265944	751.254	histone H2B
PF3D7_1105400	235597	237097	786	-	2	6844	8.70738	40S ribosomal protein S4, putative
PF3D7_1105600	241184	243517	2334	-	1	5498	2.35561	translocon component PTEX88
PF3D7_1105800	250918	252872	801	+	9	2240	2.7965	conserved Apicomplexan protein, unknown function
PF3D7_1107300	301283	311287	10005	-	1	30885	3.08696	polyadenylate-binding protein-interacting protein 1, putative
PF3D7_1108000	352556	354262	1707	+	1	4271	2.50205	IWS1-like protein, putative
PF3D7_1108300	362421	362887	324	+	2	818	2.52469	pterin-4a-carbinolamine dehydratase
PF3D7_1108400	365093	366100	1008	+	1	4786	4.74802	casein kinase 2, alpha subunit
PF3D7_1108600	369675	370706	1032	-	1	17608	17.062	endoplasmic reticulum-resident calcium binding protein
PF3D7_1108700	373238	374860	1623	-	1	5524	3.40357	heat shock protein J2
PF3D7_1109400	390644	393331	1311	-	6	3925	2.9939	essential nuclear protein 1, putative
PF3D7_1109500	391061	391145	85	-	1	786	9.24706	small nucleolar RNA snoR09
PF3D7_1109700	392510	392712	203	-	1	418	2.05911	small nucleolar RNA snoR11
PF3D7_1109900	397124	397775	339	+	2	6350	18.7316	60S ribosomal protein L36
PF3D7_1110400	414797	419556	4452	+	3	14343	3.2217	RNA-binding protein, putative
PF3D7_1110600	425904	426864	537	-	5	1322	2.46182	mitochondrial ribosomal protein L11 precursor, putative
PF3D7_1112000	459776	460620	219	+	4	632	2.88584	conserved Plasmodium protein, unknown function
PF3D7_1112100	462290	469672	7383	+	1	17639	2.38914	conserved Plasmodium protein, unknown function
PF3D7_1113100	511105	511761	657	-	1	8271	12.589	protein tyrosine phosphatase
PF3D7_1113200	517311	517985	390	+	2	1097	2.81282	conserved Plasmodium protein, unknown function
PF3D7_1113300	519189	520220	1032	+	1	3659	3.54554	UDP-galactose transporter, putative
PF3D7_1113400	521122	522824	1167	-	4	3575	3.06341	ubiquitin domain-containing protein DSK2, putative
PF3D7_1113800	531177	533285	2109	-	1	4372	2.07302	conserved Plasmodium membrane protein, unknown function
PF3D7_1114100.1	539903	541387	837	+	4	2386	2.85066	rhomboid protease ROM1
PF3D7_1114100.2	539903	541387	831	+	4	2375	2.858	rhomboid protease ROM1
PF3D7_1114200	542330	544765	1122	-	11	2376	2.11765	GTPase-activating protein, putative
PF3D7_1114700	555514	558668	2100	+	9	4745	2.25952	serine/threonine protein kinase, putative
PF3D7_1115000	570017	570714	438	+	3	889	2.02968	conserved Plasmodium protein, unknown function
PF3D7_1115200	576773	580276	2382	+	7	5056	2.12259	histone-lysine N-methyltransferase SET7
PF3D7_1115400	584328	585806	1479	-	1	5580	3.77282	cysteine proteinase falcipain 3
PF3D7_1115500	588169	589400	696	+	4	1444	2.07471	AP2 domain transcription factor, putative
PF3D7_1115600	589707	590629	588	-	3	6139	10.4405	peptidyl-prolyl cis-trans isomerase
PF3D7_1115700	592130	593584	1455	-	1	4477	3.07698	cysteine proteinase falcipain 2a
PF3D7_1115800	596289	597203	915	-	1	8234	8.99891	conserved Plasmodium protein, unknown function
PF3D7_1116000	602983	606918	3606	-	3	13866	3.84526	rhoptry neck protein 4
PF3D7_1116100	607902	613394	5493	-	1	24697	4.49609	serine esterase, putative
PF3D7_1116200.1	615744	617186	660	-	7	1350	2.04545	pyridoxine biosynthesis protein PDX2
PF3D7_1116200.2	615744	617186	546	-	6	1186	2.17216	pyridoxine biosynthesis protein PDX2
PF3D7_1116300	618312	619778	504	+	6	1404	2.78571	peptidyl-prolyl cis-trans isomerase
PF3D7_1116400	619893	621350	1458	-	1	3428	2.35117	guanine nucleotide-exchange factor SEC12
PF3D7_1116700	630779	632881	2103	-	1	11974	5.69377	dipeptidyl aminopeptidase 1
PF3D7_1116800	636094	639511	2721	-	4	33008	12.1308	heat shock protein 101
PF3D7_1117300	662000	662386	387	+	1	2202	5.68992	conserved Plasmodium protein, unknown function
PF3D7_1117400	664163	665356	1194	+	1	3116	2.60972	conserved Plasmodium protein, unknown function
PF3D7_1117700	670711	671515	645	-	2	11401	17.676	GTP-binding nuclear protein RAN/TC4
PF3D7_1120000	756192	760435	3213	+	6	7531	2.34392	conserved Plasmodium protein, unknown function
PF3D7_1120100	761695	762818	753	+	3	4124	5.47676	phosphoglycerate mutase, putative
PF3D7_1120200	765033	765625	252	+	2	1019	4.04365	conserved Plasmodium protein, unknown function
PF3D7_1121600	815386	816322	489	-	3	42541	86.9959	exported protein 1
PF3D7_1121700	820073	822520	2448	+	1	5185	2.11806	protein GCN20
PF3D7_1122300	846929	848014	1086	+	1	2765	2.54604	conserved Plasmodium protein, unknown function
PF3D7_1122700	868388	869152	765	-	1	2584	3.37778	conserved Plasmodium protein, unknown function
PF3D7_1123000	895967	903370	7404	-	1	19920	2.69044	conserved Plasmodium protein, unknown function
PF3D7_1123900	945470	946148	438	+	3	1326	3.0274	13 kDa ribonucleoprotein-associated protein, putative
PF3D7_1124600	970105	971376	1272	-	1	7016	5.51572	ethanolamine kinase
PF3D7_1124800	976880	977936	741	-	3	2883	3.89069	ribosome biogenesis regulatory protein, putative
PF3D7_1124900	981945	983086	375	+	4	2937	7.832	60S ribosomal protein L35, putative
PF3D7_1125500	1001182	1001562	381	-	1	859	2.25459	small nuclear ribonucleoprotein Sm D1, putative
PF3D7_1125600	1003226	1003694	252	-	2	600	2.38095	conserved Plasmodium protein, unknown function
PF3D7_1125700	1004780	1007354	2010	-	6	6227	3.09801	kelch domain-containing protein, putative
PF3D7_1125800	1008409	1010853	1779	-	4	5161	2.90107	kelch domain-containing protein, putative
PF3D7_1125900	1013466	1013747	282	+	1	1313	4.65603	conserved Plasmodium protein, unknown function
PF3D7_1126200	1023790	1024496	471	-	2	5171	10.9788	40S ribosomal protein S18, putative
PF3D7_1126700	1040790	1046087	2781	-	19	10506	3.77778	autophagy-related protein 23, putative
PF3D7_1127100	1060262	1060783	522	-	1	1751	3.35441	deoxyuridine 5'-triphosphate nucleotidohydrolase
PF3D7_1127500	1067197	1070219	1275	+	15	2814	2.20706	protein disulfide-isomerase, putative
PF3D7_1127600	1071752	1073813	894	+	10	2383	2.66555	CRAL/TRIO domain-containing protein, putative
PF3D7_1128100	1094909	1095931	747	-	3	1645	2.20214	prefoldin subunit 5, putative
PF3D7_1129000	1121930	1123377	966	+	4	3939	4.07764	spermidine synthase
PF3D7_1129100	1125952	1127310	1359	+	1	14153	10.4143	parasitophorous vacuolar protein 1
PF3D7_1129200	1128774	1130813	1182	+	4	4521	3.82487	26S proteasome regulatory subunit RPN7, putative
PF3D7_1130100	1163094	1163357	264	-	1	4883	18.4962	60S ribosomal protein L38
PF3D7_1130200	1165221	1166171	951	+	1	13408	14.0988	60S ribosomal protein P0
PF3D7_1130300	1166588	1166687	100	+	1	563	5.63	small nucleolar RNA snoR13
PF3D7_1130310	1166812	1166914	103	+	1	542	5.26214	small nucleolar RNA snoR14a
PF3D7_1130400	1168879	1170198	1320	+	1	3418	2.58939	26S protease regulatory subunit 6A, putative
PF3D7_1132800	1271204	1271980	777	+	1	5305	6.82754	aquaglyceroporin
PF3D7_1133000	1275574	1275663	90	+	1	539	5.98889	conserved Plasmodium protein, unknown function
PF3D7_1133200	1281284	1287633	6219	-	2	14522	2.3351	conserved Plasmodium protein, unknown function
PF3D7_1133300	1290501	1291601	1101	+	1	2838	2.57766	LEM3/CDC50 family protein, putative
PF3D7_1133400	1293856	1295724	1869	+	1	8618	4.61102	apical membrane antigen 1
PF3D7_1135700	1396433	1396764	225	-	2	828	3.68	conserved Plasmodium protein, unknown function
PF3D7_1135900	1398486	1400601	891	-	10	5529	6.20539	3-oxo-5-alpha-steroid 4-dehydrogenase, putative
PF3D7_1136300	1422744	1426201	3297	+	2	8553	2.59418	tudor staphylococcal nuclease
PF3D7_1136400	1427011	1429671	2661	-	1	6716	2.52386	signal recognition particle subunit SRP72, putative
PF3D7_1136500.1	1433141	1435170	972	-	8	4929	5.07099	casein kinase 1
PF3D7_1136500.2	1431881	1435170	975	-	9	4380	4.49231	casein kinase 1
PF3D7_1136700.1	1446489	1448505	1266	+	7	2550	2.01422	conserved Plasmodium protein, unknown function
PF3D7_1136700.2	1446489	1448505	1206	+	6	2492	2.06633	conserved Plasmodium protein, unknown function
PF3D7_1136900	1456151	1460319	4026	+	2	10911	2.71013	subtilisin-like protease 2
PF3D7_1137000	1461301	1461498	198	-	1	3320	16.7677	U2 spliceosomal RNA
PF3D7_1137300	1466197	1468266	2070	-	1	4148	2.00386	CLPTM1 domain-containing protein, putative
PF3D7_1137500	1473505	1474116	519	-	2	1141	2.19846	apicoplast ribosomal protein S14p/S29e precursor, putative
PF3D7_1139700	1582995	1584512	1518	-	1	3198	2.10672	adrenodoxin reductase, putative
PF3D7_1140100	1598550	1599632	387	-	4	986	2.5478	V-type proton ATPase subunit F, putative
PF3D7_1140200	1601257	1603078	1344	-	2	3106	2.31101	conserved Plasmodium protein, unknown function
PF3D7_1140400	1608006	1608609	504	+	2	2818	5.59127	conserved Plasmodium protein, unknown function
PF3D7_1142500	1705696	1706573	384	-	3	1562	4.06771	60S ribosomal protein L28
PF3D7_1142600	1708066	1708679	423	-	2	6812	16.104	60S ribosomal protein L35ae, putative
PF3D7_1143100	1720047	1724861	4815	-	1	15296	3.17674	AP2 domain transcription factor AP2-O, putative
PF3D7_1143200	1729793	1730899	966	+	2	3884	4.0207	DnaJ protein, putative
PF3D7_1143400	1735126	1736572	468	+	6	1098	2.34615	translation initiation factor eIF-1A, putative
PF3D7_1144000	1755438	1755935	249	+	2	3428	13.7671	40S ribosomal protein S21
PF3D7_1144300	1759257	1759922	120	-	2	1787	14.8917	60S ribosomal protein L41
PF3D7_1144900	1777525	1778928	624	-	4	2843	4.55609	ras-related protein Rab-6
PF3D7_1145200	1789323	1795370	6048	-	1	23862	3.94544	serine/threonine protein kinase, putative
PF3D7_1145300	1798776	1799670	264	-	4	1935	7.32955	cysteine-rich PDZ-binding protein, putative
PF3D7_1146600	1834401	1838773	3906	+	4	11685	2.99155	oocyst rupture protein 1, putative
PF3D7_1147400	1888637	1889139	234	-	2	906	3.87179	conserved Plasmodium protein, unknown function
PF3D7_1147900	1907055	1907708	654	-	1	1938	2.9633	conserved Plasmodium protein, unknown function
PF3D7_1148200	1920268	1920811	544	+	1	7940	14.5956	unspecified product
PF3D7_1148500	1922656	1922928	273	+	1	51932	190.227	unspecified product
PF3D7_1148600	1925942	1933150	7209	+	1	101696	14.1068	18S ribosomal RNA
PF3D7_1148900	1945778	1946047	270	+	1	871	3.22593	Plasmodium exported protein, unknown function
PF3D7_1149100.1	1972400	1973874	1353	+	2	6959	5.14339	Plasmodium exported protein, unknown function
PF3D7_1149100.2	1972400	1973874	1350	+	2	6959	5.15481	Plasmodium exported protein, unknown function
PF3D7_1149200	1976407	1979804	3273	+	2	63230	19.3187	ring-infected erythrocyte surface antigen
PF3D7_1149400	1985870	1986639	630	-	2	1691	2.68413	Plasmodium exported protein, unknown function
PF3D7_1200700	61556	64336	2781	-	1	8858	3.18519	acyl-CoA synthetase
PF3D7_1201200	89934	90749	666	+	2	4800	7.20721	Plasmodium exported protein (PHISTa-like), unknown function
PF3D7_1201900	107338	108202	624	-	2	1804	2.89103	conserved protein, unknown function
PF3D7_1202900	162429	162722	294	-	1	13471	45.8197	high mobility group protein B1
PF3D7_1203100	171507	172136	513	-	2	1079	2.10331	conserved Plasmodium protein, unknown function
PF3D7_1203700	187146	188842	1044	-	3	13107	12.5546	nucleosome assembly protein
PF3D7_1203800	190105	193113	3009	-	1	8427	2.8006	unspecified product
PF3D7_1203900	194144	195462	444	+	5	2258	5.08559	ubiquitin-conjugating enzyme E2
PF3D7_1204300	205491	205976	486	-	1	6851	14.0967	eukaryotic translation initiation factor 5A
PF3D7_1204900	217184	218239	393	+	6	1307	3.3257	probable protein, unknown function
PF3D7_1205500	242811	248168	5358	+	1	16844	3.14371	zinc finger protein, putative
PF3D7_1205700	253155	254123	969	+	1	2268	2.34056	targeted glyoxalase II
PF3D7_1205800	256367	263731	6855	+	4	19318	2.81809	high mobility group protein B3, putative
PF3D7_1206000	270300	271214	915	-	1	5464	5.97158	shewanella-like protein phosphatase 2
PF3D7_1206200	275744	279336	2955	-	3	6568	2.22267	eukaryotic translation initiation factor 3 subunit C, putative
PF3D7_1206700	301129	302826	1698	-	1	6175	3.63663	eukaryotic translation initiation factor 5, putative
PF3D7_1208300	388545	389147	474	+	2	1548	3.26582	mitochondrial ACP precursor, putative
PF3D7_1210100	455304	456236	933	-	1	2082	2.23151	syntaxin, Qa-SNARE family
PF3D7_1211400	505344	506662	735	+	4	2649	3.60408	heat shock protein DNAJ homologue Pfj4
PF3D7_1211800	526109	527780	1146	+	2	25931	22.6274	polyubiquitin
PF3D7_1212000	534912	535915	618	-	3	1306	2.11327	glutathione peroxidase-like thioredoxin peroxidase
PF3D7_1212700	558047	562180	4134	-	1	12788	3.09337	eukaryotic translation initiation factor 3 subunit A, putative
PF3D7_1212900	568569	571835	3267	-	1	21365	6.53964	bromodomain protein 2, putative
PF3D7_1213100	576417	576580	164	-	1	1311	7.9939	U1 spliceosomal RNA
PF3D7_1213600	586809	587090	282	+	1	807	2.8617	dynein light chain 1, putative
PF3D7_1214900	618764	620111	738	+	5	2254	3.0542	conserved Plasmodium membrane protein, unknown function
PF3D7_1216200	648889	650552	1104	+	5	2507	2.27083	glycerol-3-phosphate dehydrogenase [NAD(+)], putative
PF3D7_1216300	651398	651856	459	-	1	2278	4.96296	signal recognition particle subunit SRP19
PF3D7_1216500	657339	658004	666	-	1	2965	4.45195	male development gene 1
PF3D7_1216900	670447	673266	2820	+	1	11528	4.08794	DNA-binding chaperone, putative
PF3D7_1217500	693067	693711	645	+	1	12231	18.9628	conserved Plasmodium protein, unknown function
PF3D7_1218000	703895	704953	1059	+	1	4956	4.67989	thrombospondin-related apical membrane protein
PF3D7_1218400	720886	723448	1437	-	10	5625	3.91441	triose or hexose phosphate/phosphate translocator, putative
PF3D7_1220900	831252	832052	801	-	1	3549	4.43071	heterochromatin protein 1
PF3D7_1221200	849840	850652	321	+	4	682	2.12461	conserved Plasmodium protein, unknown function
PF3D7_1221900	872361	874940	2580	-	1	5187	2.01047	conserved Plasmodium membrane protein, unknown function
PF3D7_1222300	883567	886032	2466	-	1	11226	4.55231	endoplasmin, putative
PF3D7_1222700	918722	919336	615	+	1	10445	16.9837	glideosome-associated protein 45
PF3D7_1223000	925375	926249	405	-	4	1281	3.16296	conserved Plasmodium protein, unknown function
PF3D7_1223100	927825	929991	1326	-	3	10992	8.28959	cAMP-dependent protein kinase regulatory subunit
PF3D7_1223400	941125	946745	4857	+	6	20861	4.29504	phospholipid-transporting ATPase, putative
PF3D7_1223700	968980	970073	822	+	2	1770	2.15328	vacuolar iron transporter
PF3D7_1224000	974372	975541	1170	+	1	4195	3.58547	GTP cyclohydrolase I
PF3D7_1224100	976820	977889	579	-	4	2973	5.13472	conserved Plasmodium protein, unknown function
PF3D7_1224300	988628	991255	2628	+	1	8398	3.19559	polyadenylate-binding protein, putative
PF3D7_1224900	1010832	1011342	321	-	2	789	2.45794	splicing factor 3B subunit 6, putative
PF3D7_1226300	1065796	1066683	888	+	1	3131	3.5259	haloacid dehalogenase-like hydrolase, putative
PF3D7_1227000	1092160	1092651	492	-	1	1108	2.25203	conserved Plasmodium protein, unknown function
PF3D7_1228600	1160729	1162960	2232	-	1	89143	39.9386	merozoite surface protein 9
PF3D7_1228800	1169557	1179186	9630	-	1	23625	2.45327	WD repeat-containing protein, putative
PF3D7_1229300	1204991	1207963	2973	+	1	14068	4.73192	conserved Plasmodium protein, unknown function
PF3D7_1229400	1208912	1209542	351	+	2	2036	5.80057	macrophage migration inhibitory factor
PF3D7_1229700	1218181	1218766	249	+	3	559	2.24498	conserved Plasmodium protein, unknown function
PF3D7_1229800	1219136	1226465	6825	-	4	15695	2.29963	myosin J, putative
PF3D7_1231100	1276257	1277734	642	+	7	1960	3.05296	ras-related protein Rab-2
PF3D7_1231200	1278460	1279611	1152	-	1	5026	4.36285	conserved Plasmodium protein, unknown function
PF3D7_1231500	1299608	1300027	420	+	1	840	2	mitosis protein dim1, putative
PF3D7_1232400	1337710	1338816	1107	-	1	3556	3.21229	conserved protein, unknown function
PF3D7_1232500	1339845	1343314	3216	-	2	19099	5.93874	CG2-related protein, putative
PF3D7_1232600	1344263	1345351	1089	+	1	3105	2.85124	conserved Plasmodium protein, unknown function
PF3D7_1232800	1350645	1351283	429	-	3	1535	3.57809	conserved Plasmodium protein, unknown function
PF3D7_1233800	1405182	1405968	621	-	3	1305	2.10145	conserved Plasmodium protein, unknown function
PF3D7_1234900	1458233	1459182	456	+	3	2010	4.40789	conserved Plasmodium protein, unknown function
PF3D7_1235300	1470713	1475701	4989	+	1	15423	3.0914	CCR4-NOT transcription complex subunit 4, putative
PF3D7_1236100	1506932	1508269	1338	-	1	2787	2.08296	clustered-asparagine-rich protein
PF3D7_1236800	1532248	1534077	1530	+	3	3328	2.17516	protein-S-isoprenylcysteine O-methyltransferase, putative
PF3D7_1237700	1572371	1573557	633	+	2	8044	12.7077	conserved protein, unknown function
PF3D7_1237900	1577181	1580747	3567	+	1	8325	2.33389	conserved Plasmodium protein, unknown function
PF3D7_1238000	1581984	1582987	447	+	3	1956	4.37584	COPI associated protein, putative
PF3D7_1238100	1583909	1584595	687	-	1	1499	2.18195	calcyclin binding protein, putative
PF3D7_1238800	1610363	1612741	2379	+	1	5159	2.16856	acyl-CoA synthetase
PF3D7_1239200	1634695	1642428	7734	+	1	23020	2.97647	AP2 domain transcription factor, putative
PF3D7_1240100	1685094	1685411	318	-	1	1037	3.26101	early transcribed membrane protein 12
PF3D7_1242700	1803653	1804483	414	+	2	4457	10.7657	40S ribosomal protein S17, putative
PF3D7_1242800	1805380	1807356	1380	-	4	3288	2.38261	rab specific GDP dissociation inhibitor
PF3D7_1242900	1808878	1809622	288	-	3	730	2.53472	mitochondrial import inner membrane translocase subunit TIM13, putative
PF3D7_1243400	1818738	1820069	1332	+	1	3450	2.59009	conserved Plasmodium protein, unknown function
PF3D7_1243600	1825959	1826884	348	+	3	8484	24.3793	translation initiation factor SUI1, putative
PF3D7_1243700	1829660	1831057	1398	+	1	6759	4.83476	ubiquitin-conjugating enzyme E2, putative
PF3D7_1243800	1831484	1832949	1113	-	4	4551	4.08895	WD repeat-containing protein 82, putative
PF3D7_1244300	1857849	1858090	242	+	1	1499	6.19421	ACEA small nucleolar RNA U3
PF3D7_1244400	1859656	1863846	4008	+	2	19090	4.76297	RNA-binding protein, putative
PF3D7_1244600	1868533	1869531	999	-	1	2055	2.05706	ADP-ribosylation factor GTPase-activating protein
PF3D7_1244700	1871919	1872911	669	+	3	2923	4.36921	conserved Plasmodium protein, unknown function
PF3D7_1244800	1873194	1875287	1008	-	9	2080	2.06349	cytoplasmic translation machinery associated protein, putative
PF3D7_1246200	1920784	1921914	1131	+	1	37242	32.9284	actin I
PF3D7_1246400	1931970	1932584	615	+	1	7263	11.8098	myosin A tail domain interacting protein
PF3D7_1246800	1941365	1942491	786	+	4	2222	2.82697	signal recognition particle receptor subunit beta, putative
PF3D7_1247700	1964862	1966025	1164	-	1	2782	2.39003	conserved Plasmodium protein, unknown function
PF3D7_1248500	1983480	1984349	870	-	1	16682	19.1747	bax inhibitor 1, putative
PF3D7_1248700	1994775	2000744	5970	+	1	20932	3.5062	conserved Plasmodium protein, unknown function
PF3D7_1249400	2016325	2016756	432	-	1	1454	3.36574	conserved Plasmodium protein, unknown function
PF3D7_1250000	2044120	2044626	507	+	1	1087	2.14398	rRNA-processing protein FCF2, putative
PF3D7_1250200	2059108	2063227	3120	+	6	11284	3.61667	CSC1-like protein, putative
PF3D7_1250300	2064987	2066040	894	+	2	2199	2.45973	vacuolar protein sorting-associated protein 26, putative
PF3D7_1251100	2089484	2090220	405	+	3	1392	3.43704	conserved Plasmodium protein, unknown function
PF3D7_1251200	2092087	2094231	1809	+	3	14935	8.25594	coronin
PF3D7_1251300	2095062	2096508	633	-	7	2096	3.31122	thymidylate kinase
PF3D7_1252100	2114628	2122487	6648	-	8	24205	3.64094	rhoptry neck protein 3
PF3D7_1252300	2128400	2128786	258	-	2	1182	4.5814	conserved Plasmodium protein, unknown function
PF3D7_1252400	2136053	2144874	8672	+	2	23254	2.6815	reticulocyte binding protein homologue 3, pseudogene
PF3D7_1253100	2171342	2172349	867	+	2	2364	2.72664	Plasmodium exported protein (PHISTa), unknown function
PF3D7_1301600	89319	93352	3633	-	4	33720	9.28159	erythrocyte binding antigen-140
PF3D7_1301700	99548	100521	738	+	2	7600	10.2981	CX3CL1-binding protein 2
PF3D7_1302000	112792	113815	939	-	2	2676	2.84984	EMP1-trafficking protein
PF3D7_1302100	121636	122289	654	-	1	1598	2.44343	gamete antigen 27/25
PF3D7_1302300	126611	127141	369	-	2	745	2.01897	Plasmodium exported protein, unknown function
PF3D7_1302800	150783	151635	585	-	2	8913	15.2359	40S ribosomal protein S7, putative
PF3D7_1303500	169874	175789	5763	-	2	13223	2.29446	sodium/hydrogen exchanger, Na+, H+ antiporter
PF3D7_1304500	235800	236435	636	-	1	1371	2.15566	small heat shock protein, putative
PF3D7_1306400	297178	298359	1182	-	1	4617	3.90609	26S protease regulatory subunit 10B, putative
PF3D7_1307500	338189	338455	267	-	1	2403	9	conserved Plasmodium protein, unknown function
PF3D7_1308000	356709	359201	2493	+	1	7062	2.83273	conserved Plasmodium membrane protein, unknown function
PF3D7_1308300	372260	372646	249	+	2	4666	18.739	40S ribosomal protein S27
PF3D7_1309100	418820	420121	489	+	3	4304	8.80164	60S ribosomal protein L24, putative
PF3D7_1309200	424232	427036	2484	+	3	7063	2.8434	protein phosphatase PPM6, putative
PF3D7_1309500	436676	437305	630	-	1	1381	2.19206	H/ACA ribonucleoprotein complex subunit 1, putative
PF3D7_1310200	454061	454636	435	+	2	1629	3.74483	conserved Plasmodium protein, unknown function
PF3D7_1310600	465091	466552	624	-	6	2305	3.69391	ras-related protein Rab-5B
PF3D7_1310700	468232	468663	432	-	1	13903	32.1829	RNA-binding protein, putative
PF3D7_1311500	489927	491609	1263	-	2	3713	2.93983	26S protease regulatory subunit 7, putative
PF3D7_1311900	507900	509735	1836	+	1	3683	2.00599	V-type proton ATPase catalytic subunit A
PF3D7_1312500	526863	527060	198	-	1	554	2.79798	conserved Plasmodium protein, unknown function
PF3D7_1312700	532270	533958	1689	-	1	4186	2.47839	conserved Plasmodium protein, unknown function
PF3D7_1312800	536702	544523	7086	-	2	16280	2.29749	conserved Plasmodium protein, unknown function
PF3D7_1312900	548586	552841	3768	+	3	11862	3.14809	eukaryotic translation initation factor 4 gamma
PF3D7_1313000	553752	554251	231	-	2	563	2.43723	ubiquitin-like protein nedd8 homologue, putative
PF3D7_1315000	636812	637612	645	+	2	2962	4.59225	conserved Plasmodium protein, unknown function
PF3D7_1315400	647986	650511	1260	-	5	5125	4.06746	zinc finger (CCCH type) protein, putative
PF3D7_1315500	652794	653838	552	-	4	1169	2.11775	conserved Plasmodium protein, unknown function
PF3D7_1315600	655207	657259	630	-	9	4410	7	CDP-diacylglycerol--inositol 3-phosphatidyltransferase
PF3D7_1316600	691014	694125	2691	+	3	11238	4.17614	choline-phosphate cytidylyltransferase
PF3D7_1316900	701047	703923	2877	-	1	6757	2.34863	conserved Plasmodium protein, unknown function
PF3D7_1317000	708346	710268	1923	+	1	3938	2.04784	U4/U6.U5 tri-snRNP-associated protein 2, putative
PF3D7_1317800	740527	741454	438	+	2	7571	17.2854	40S ribosomal protein S19
PF3D7_1318700	770646	772895	2250	-	1	5252	2.33422	conserved Plasmodium protein, unknown function
PF3D7_1319400	801712	806029	3213	+	10	6578	2.04731	conserved Plasmodium protein, unknown function
PF3D7_1320600	847090	848383	651	+	5	2816	4.32565	ras-related protein Rab-11A
PF3D7_1321500.1	890106	894782	3420	-	9	7957	2.32661	3',5'-cyclic nucleotide phosphodiesterase, putative
PF3D7_1321500.2	890106	894782	3420	-	9	7957	2.32661	3',5'-cyclic nucleotide phosphodiesterase, putative
PF3D7_1321900	911667	912545	879	-	1	4316	4.91013	conserved Plasmodium protein, unknown function
PF3D7_1322000	916360	918594	1698	+	4	3608	2.12485	nucleoside-diphosphatase, putative
PF3D7_1323100	965486	966280	573	-	2	5793	10.1099	60S ribosomal protein L6, putative
PF3D7_1323200	968110	968798	372	-	3	1483	3.98656	V-type proton ATPase subunit G, putative
PF3D7_1323400	971847	973036	573	-	4	7186	12.541	60S ribosomal protein L23
PF3D7_1323700	982611	983801	912	+	3	12248	13.4298	glideosome associated protein with multiple membrane spans 1
PF3D7_1324900	1041157	1042107	951	+	1	8926	9.38591	L-lactate dehydrogenase
PF3D7_1325100	1044552	1045865	1314	-	1	4034	3.07002	phosphoribosylpyrophosphate synthetase
PF3D7_1325300	1050915	1051319	405	+	1	875	2.16049	conserved Plasmodium protein, unknown function
PF3D7_1325600	1067097	1067685	426	+	2	868	2.03756	mitochondrial fission 1 protein, putative
PF3D7_1326000	1085786	1086861	492	-	4	1223	2.48577	conserved Plasmodium protein, unknown function
PF3D7_1326200	1090329	1091327	798	-	3	1606	2.01253	conserved Plasmodium protein, unknown function
PF3D7_1327300	1145719	1151106	5388	+	1	18451	3.42446	conserved Plasmodium protein, unknown function
PF3D7_1327400	1152603	1153511	909	-	1	3568	3.92519	conserved Plasmodium protein, unknown function
PF3D7_1327600	1159366	1159980	615	+	1	1375	2.23577	nicotinamide/nicotinic acid mononucleotide adenylyltransferase
PF3D7_1328100	1184208	1185020	813	+	1	2278	2.80197	proteasome subunit beta type-7, putative
PF3D7_1328300	1196229	1197509	999	-	3	4266	4.27027	conserved Plasmodium protein, unknown function
PF3D7_1328500	1204186	1207200	3015	-	1	6445	2.13765	alpha/beta-hydrolase, putative
PF3D7_1328800	1214907	1215728	822	+	1	1953	2.37591	transcriptional regulatory protein sir2a
PF3D7_1329600	1258956	1259861	906	-	1	4375	4.82892	conserved Plasmodium protein, unknown function
PF3D7_1330100	1274448	1275008	561	+	1	1844	3.28699	conserved Plasmodium protein, unknown function
PF3D7_1330200	1275104	1275899	681	+	2	1876	2.75477	conserved Plasmodium protein, unknown function
PF3D7_1330400.1	1279800	1281285	855	-	5	2040	2.38596	ER lumen protein retaining receptor 1, putative, unspecified product
PF3D7_1330800	1294615	1296966	1791	+	2	5303	2.96092	RNA-binding protein, putative
PF3D7_1330900	1294943	1295022	80	+	1	642	8.025	small nucleolar RNA snoR17
PF3D7_1331200	1306654	1307999	1224	+	2	3353	2.73938	conserved Plasmodium protein, unknown function
PF3D7_1331300	1309177	1310006	555	+	2	2223	4.00541	signal peptidase 21 kDa subunit
PF3D7_1331500	1313924	1315786	1863	+	1	4712	2.52925	conserved Plasmodium protein, unknown function
PF3D7_1331600	1316496	1317806	687	-	4	2004	2.91703	protein tyrosine phosphatase-like protein, putative
PF3D7_1331800	1324012	1324802	420	+	2	4819	11.4738	60S ribosomal protein L23, putative
PF3D7_1332000	1325913	1327532	846	-	5	2000	2.36407	syntaxin, Qa-SNARE family
PF3D7_1332100	1329491	1331059	1569	+	1	4225	2.6928	conserved Plasmodium membrane protein, unknown function
PF3D7_1332200	1332299	1335592	3006	+	3	6966	2.31737	conserved Plasmodium protein, unknown function
PF3D7_1332300	1336401	1336892	492	+	1	1775	3.60772	trafficking protein particle complex subunit 2, putative
PF3D7_1332400	1337117	1339693	2577	-	1	5440	2.11098	nucleotidyltransferase, putative
PF3D7_1332500	1340786	1341442	657	+	1	3065	4.66514	SAM-dependent RNA methyltransferase, putative
PF3D7_1333300	1368081	1368716	636	-	1	1288	2.02516	transmembrane protein Tmp21 homologue, putative
PF3D7_1334900	1414878	1415018	141	-	1	438	3.10638	MSP7-like protein, fragment, pseudogene
PF3D7_1335100	1419086	1420141	1056	-	1	29944	28.3561	merozoite surface protein 7
PF3D7_1335300	1428874	1438852	9765	-	2	71140	7.2852	reticulocyte binding protein 2 homologue b
PF3D7_1335400	1440779	1450385	9393	+	2	77079	8.206	reticulocyte binding protein 2 homologue a
PF3D7_1336700	1482361	1482837	477	-	1	3615	7.57862	conserved Plasmodium protein, unknown function
PF3D7_1337400	1506965	1508977	1755	+	3	4270	2.43305	conserved Plasmodium protein, unknown function
PF3D7_1337800	1528502	1530208	1707	-	1	6996	4.09842	calcium-dependent protein kinase 5
PF3D7_1337900	1534507	1535166	660	+	1	2059	3.1197	conserved Plasmodium protein, unknown function
PF3D7_1338100	1542080	1543981	1512	+	2	3799	2.51257	26S proteasome regulatory subunit RPN3, putative
PF3D7_1338200	1545070	1545735	666	-	1	8684	13.039	60S ribosomal protein L6-2, putative
PF3D7_1338300	1548692	1550396	1236	+	2	7075	5.72411	elongation factor 1-gamma, putative
PF3D7_1338600	1556659	1559734	2844	-	3	6218	2.18636	conserved Plasmodium protein, unknown function
PF3D7_1338700	1561255	1563123	1869	-	1	4489	2.40182	conserved Plasmodium protein, unknown function
PF3D7_1339100	1575356	1575427	72	+	1	166	2.30556	tRNA Methionine
PF3D7_1339300	1583226	1584053	828	+	1	5809	7.0157	conserved Plasmodium protein, unknown function
PF3D7_1339400	1585806	1586399	447	-	2	1203	2.69128	conserved Plasmodium protein, unknown function
PF3D7_1339500	1587028	1587874	336	-	4	915	2.72321	mitochondrial ribosomal protein L49 precursor, putative
PF3D7_1340900	1627311	1629480	2064	+	2	6921	3.3532	sodium-dependent phosphate transporter
PF3D7_1341100	1632602	1632709	108	-	1	315	2.91667	U6 spliceosomal RNA
PF3D7_1341200	1633860	1634530	555	-	2	4432	7.98559	60S ribosomal protein L18, putative
PF3D7_1341300	1636556	1637833	564	+	3	3828	6.78723	60S ribosomal protein L18-2, putative
PF3D7_1342000	1653211	1654131	921	-	1	8473	9.19978	40S ribosomal protein S6
PF3D7_1342400	1666832	1668153	1158	-	2	2989	2.58117	casein kinase II beta chain
PF3D7_1342600	1673699	1676539	2457	+	3	16462	6.70004	myosin A
PF3D7_1342700	1677540	1677917	177	-	3	389	2.19774	DNA-directed RNA polymerases I, II, and III subunit RPABC4, putative
PF3D7_1343000	1696894	1698113	801	+	4	22384	27.9451	phosphoethanolamine N-methyltransferase
PF3D7_1343100	1699683	1700630	948	-	1	9286	9.79536	conserved Plasmodium protein, unknown function
PF3D7_1343300	1707731	1710679	2949	-	1	7423	2.51712	CDT1-like protein, putative
PF3D7_1343700	1724817	1726997	2181	-	1	4731	2.16919	kelch protein K13
PF3D7_1344200	1769129	1771927	2799	+	1	11140	3.97999	heat shock protein 110, putative
PF3D7_1345000	1807159	1809617	1011	+	11	3079	3.0455	conserved Plasmodium protein, unknown function
PF3D7_1345100	1809736	1810521	474	-	4	1461	3.08228	thioredoxin 2
PF3D7_1346100	1843376	1844897	1419	+	2	7070	4.98238	protein transport protein SEC61 subunit alpha
PF3D7_1346300	1849528	1850517	636	+	3	2735	4.30031	DNA/RNA-binding protein Alba 2
PF3D7_1347200	1889853	1891121	1269	-	1	13056	10.2884	nucleoside transporter 1
PF3D7_1347500	1897983	1899362	1119	-	2	15277	13.6524	DNA/RNA-binding protein Alba 4
PF3D7_1347700	1908960	1910885	1722	+	3	6682	3.88037	ethanolamine-phosphate cytidylyltransferase
PF3D7_1348200	1927449	1928260	615	+	2	1434	2.33171	step II splicing factor, putative
PF3D7_1348500	1950400	1951847	1044	+	2	2193	2.10057	TBC domain protein, putative
PF3D7_1348600	1953304	1954852	1116	+	4	2275	2.03853	conserved Plasmodium protein, unknown function
PF3D7_1349500	1985337	1995614	10146	-	2	23837	2.3494	conserved Plasmodium protein, unknown function
PF3D7_1349700	1998815	1999771	768	+	2	1834	2.38802	peptidase, putative
PF3D7_1351400	2052108	2053384	612	+	3	5657	9.24346	60S ribosomal protein L17, putative
PF3D7_1351600	2055216	2056721	1506	+	1	3276	2.1753	glycerol kinase
PF3D7_1351700	2059616	2063924	3957	+	3	8646	2.18499	inner membrane complex protein 1f, putative
PF3D7_1351800.1	2065373	2066409	693	+	2	2312	3.33622	conserved Plasmodium protein, unknown function
PF3D7_1351800.2	2065373	2066409	708	+	2	2324	3.28249	conserved Plasmodium protein, unknown function
PF3D7_1352500	2093365	2094337	627	-	2	10407	16.5981	thioredoxin-related protein, putative
PF3D7_1353000	2118361	2120913	2406	-	2	8595	3.57232	tryptophan-rich protein, pseudogene
PF3D7_1353100	2124272	2125270	858	-	2	2428	2.82984	Plasmodium exported protein, unknown function
PF3D7_1353200	2130531	2131065	414	+	2	1357	3.27778	membrane associated histidine-rich protein
PF3D7_1353600	2146181	2147147	666	-	3	2274	3.41441	ER lumen protein retaining receptor
PF3D7_1353800	2151402	2152373	741	-	2	2012	2.71525	proteasome subunit alpha type-4, putative
PF3D7_1353900	2154162	2155217	726	+	4	1742	2.39945	proteasome subunit alpha type-7, putative
PF3D7_1354400	2169314	2170416	546	-	5	1313	2.40476	V-type proton ATPase 21 kDa proteolipid subunit, putative
PF3D7_1355800	2214445	2215085	261	+	4	645	2.47126	splicing factor 3B subunit 5, putative
PF3D7_1356100	2224146	2227040	2895	-	1	7060	2.43869	conserved Plasmodium protein, unknown function
PF3D7_1356300	2231883	2233248	609	+	7	1936	3.17898	ubiquitin-conjugating enzyme E2, putative
PF3D7_1356800	2249587	2261721	12135	+	1	34462	2.83988	serine/threonine protein kinase, putative
PF3D7_1357000	2265817	2267148	1332	-	1	28997	21.7695	elongation factor 1-alpha
PF3D7_1357100	2268901	2270232	1332	+	1	29126	21.8664	elongation factor 1-alpha
PF3D7_1358400	2317002	2317844	420	+	3	921	2.19286	conserved Plasmodium protein, unknown function
PF3D7_1358700	2326394	2326855	462	-	1	4816	10.4242	YOP1-like protein, putative
PF3D7_1358800	2331074	2331529	456	+	1	6526	14.3114	40S ribosomal protein S15
PF3D7_1359400	2359251	2361198	1530	-	2	3229	2.11046	CUGBP Elav-like family member 1
PF3D7_1359600	2371882	2377959	6078	+	1	12922	2.12603	conserved Plasmodium protein, unknown function
PF3D7_1361900	2482472	2483296	825	-	1	4344	5.26545	proliferating cell nuclear antigen 1
PF3D7_1363900	2562118	2562968	851	+	1	8869	10.4219	unspecified product
PF3D7_1365700	2624553	2626098	1227	-	3	3255	2.65281	SNARE associated Golgi protein, putative
PF3D7_1365900	2632534	2633260	387	-	2	6196	16.0103	ubiquitin-60S ribosomal protein L40
PF3D7_1366000	2635213	2635488	276	+	1	627	2.27174	conserved Plasmodium protein, unknown function
PF3D7_1366600	2663422	2665152	1731	-	1	4763	2.75159	signal recognition particle receptor subunit alpha, putative
PF3D7_1366800	2668398	2670524	1074	-	9	2323	2.16294	phosphatidylserine synthase, putative
PF3D7_1366900	2675590	2677966	2058	+	3	9596	4.66278	conserved Plasmodium protein, unknown function
PF3D7_1368300	2717853	2719377	693	+	6	2926	4.22222	conserved Plasmodium protein, unknown function
PF3D7_1368400	2719490	2721420	963	-	6	2246	2.33229	conserved Plasmodium protein, unknown function
PF3D7_1368600	2725669	2725947	279	-	1	669	2.39785	mitochondrial import inner membrane translocase subunit TIM9, putative
PF3D7_1370300	2787972	2788913	750	+	2	3763	5.01733	membrane associated histidine-rich protein
PF3D7_1370500	2794237	2794851	615	+	1	9485	15.4228	unspecified product
PF3D7_1370800	2796119	2797144	1026	+	1	180372	175.801	unspecified product
PF3D7_1370900	2797507	2798103	597	+	1	82625	138.4	unspecified product
PF3D7_1371300	2802945	2807159	4215	+	1	100786	23.9113	28S ribosomal RNA
PF3D7_1372200	2840727	2841703	828	-	2	10357	12.5085	histidine-rich protein III
PF3D7_1401100	41289	43093	1479	-	2	5880	3.97566	DnaJ protein, putative
PF3D7_1401400	53411	53734	324	-	1	12718	39.2531	early transcribed membrane protein 14.1
PF3D7_1401600	61364	62988	1437	-	2	8450	5.88031	Plasmodium exported protein (PHISTb), unknown function
PF3D7_1401800	71368	72690	1323	+	1	3975	3.00454	choline kinase
PF3D7_1402200	84735	85301	567	+	1	3529	6.22399	conserved Plasmodium protein, unknown function
PF3D7_1402500	92264	93537	450	-	3	7550	16.7778	ribosomal protein S27a, putative
PF3D7_1403500	130022	132100	813	-	9	1916	2.3567	dynein light chain, putative
PF3D7_1403600	132554	133245	351	+	3	2271	6.47009	selenoprotein
PF3D7_1404700	161227	162099	873	-	1	3429	3.92784	conserved Plasmodium protein, unknown function
PF3D7_1404800	163990	166854	2865	-	1	10755	3.75393	conserved Plasmodium protein, unknown function
PF3D7_1404900	170000	170893	894	+	1	16148	18.0626	conserved Plasmodium protein, unknown function
PF3D7_1405600	193216	194265	1050	-	1	2922	2.78286	ribonucleoside-diphosphate reductase small chain, putative
PF3D7_1405700	196327	198486	2160	-	1	6583	3.04769	RING zinc finger protein, putative
PF3D7_1406800	246380	247721	855	-	3	12409	14.5135	glideosome associated protein with multiple membrane spans 3
PF3D7_1407800	283086	284435	1350	+	1	13142	9.73481	plasmepsin IV
PF3D7_1408000	293471	294832	1362	+	1	4163	3.05653	plasmepsin II
PF3D7_1408100	297468	298823	1356	+	1	5984	4.41298	plasmepsin III
PF3D7_1408600	323317	324172	657	+	2	7802	11.8752	40S ribosomal protein S8e, putative
PF3D7_1409200.1	360656	361539	597	-	3	1196	2.00335	conserved Plasmodium protein, unknown function
PF3D7_1409200.2	360656	361539	561	-	3	1157	2.06239	conserved Plasmodium protein, unknown function
PF3D7_1409300	363092	364240	1149	+	1	4801	4.17842	DNA damage-inducible protein 1, putative
PF3D7_1409400	365509	367027	789	-	4	5656	7.16857	conserved Plasmodium membrane protein, unknown function
PF3D7_1410400	420442	422790	2349	+	1	32710	13.9251	rhoptry-associated protein 1
PF3D7_1410500	423751	424250	402	-	2	1197	2.97761	conserved Plasmodium protein, unknown function
PF3D7_1410600	427191	428588	1398	+	1	5151	3.68455	eukaryotic translation initiation factor 2 subunit gamma, putative
PF3D7_1410700	429690	430861	1005	-	2	4099	4.07861	conserved Plasmodium protein, unknown function
PF3D7_1411000.1	440541	447773	6165	+	10	49454	8.02174	conserved Plasmodium protein, unknown function
PF3D7_1411000.2	440541	447773	6096	+	9	49241	8.07759	conserved Plasmodium protein, unknown function
PF3D7_1411100.1	447923	449968	1122	-	8	17383	15.4929	conserved Plasmodium membrane protein, unknown function, unspecified product
PF3D7_1411100.2	447990	449968	1017	-	8	15142	14.8889	conserved Plasmodium membrane protein, unknown function, unspecified product
PF3D7_1411200	452175	454879	2217	-	4	10968	4.94723	rhomboid protease ROM8
PF3D7_1412300	491494	492221	378	-	3	3416	9.03704	nuclear transport factor 2, putative
PF3D7_1414200	564024	565247	1224	-	1	6714	5.48529	conserved Plasmodium protein, unknown function
PF3D7_1414300	570802	571461	660	+	1	8008	12.1333	60S ribosomal protein L10, putative
PF3D7_1414400	575496	577055	915	+	5	5847	6.39016	serine/threonine protein phosphatase PP1
PF3D7_1414500	578369	587529	8277	-	6	19420	2.34626	atypical protein kinase, ABC-1 family, putative
PF3D7_1418500	779377	779495	119	+	1	4405	37.0168	5S ribosomal RNA
PF3D7_1418600	780006	780124	119	+	1	4419	37.1345	5S ribosomal RNA
PF3D7_1418700	780916	781034	119	+	1	4301	36.1429	5S ribosomal RNA
PF3D7_1418800	782049	782361	313	-	1	1009	3.22364	signal recognition particle RNA
PF3D7_1419700	820068	821597	1530	+	1	6929	4.52876	conserved Plasmodium protein, unknown function
PF3D7_1420700	860011	863080	2910	+	2	37586	12.9162	surface protein P113
PF3D7_1421150	875173	875321	149	-	1	82908	556.43	C/D small nucleolar RNA
PF3D7_1421200	875687	876385	318	-	3	4869	15.3113	40S ribosomal protein S25
PF3D7_1421900	891140	891622	483	-	1	4402	9.11387	copper transporter, putative
PF3D7_1422000	891991	893049	282	-	3	1237	4.38652	cytochrome c oxidase assembly protein COX14, putative
PF3D7_1423700	959074	963750	4677	-	1	10493	2.24353	conserved Plasmodium protein, unknown function
PF3D7_1423900	972775	972860	86	-	1	632	7.34884	small nucleolar RNA snoR23
PF3D7_1424000	973147	973225	79	-	1	851	10.7722	small nucleolar RNA snoR24
PF3D7_1424100	973853	975543	885	-	3	7204	8.14011	60S ribosomal protein L5, putative
PF3D7_1424400	977908	979166	852	+	3	8557	10.0434	60S ribosomal protein L7-3, putative
PF3D7_1424500	979464	979605	142	+	1	578	4.07042	small nucleolar RNA snoR27
PF3D7_1424600	979767	979836	70	+	1	236	3.37143	small nucleolar RNA snoR28
PF3D7_1424700	981588	981671	84	+	1	22288	265.333	small nucleolar RNA snoR29
PF3D7_1424800	981881	981998	118	+	1	1675	14.1949	unspecified product
PF3D7_1424900	982154	982228	75	+	1	11695	155.933	small nucleolar RNA snoR30
PF3D7_1425000	982349	982520	172	+	1	863	5.01744	Plasmodium RNA of unknown function RUF4
PF3D7_1425100	982892	983018	127	+	1	4449	35.0315	small nucleolar RNA snoR31
PF3D7_1425300	985365	987755	924	-	7	3430	3.71212	conserved Plasmodium protein, unknown function
PF3D7_1426000	1016133	1016618	486	-	1	5015	10.3189	60S ribosomal protein L21
PF3D7_1426100	1018745	1019260	516	-	1	2555	4.95155	transcription factor BTF3, putative
PF3D7_1426200	1021652	1022857	1206	-	1	3264	2.70647	protein arginine N-methyltransferase 1
PF3D7_1426900	1050050	1050316	267	-	1	1373	5.14232	cytochrome b-c1 complex subunit 6, putative
PF3D7_1427900	1092936	1093781	846	+	1	5439	6.42908	leucine-rich repeat protein
PF3D7_1428200	1101958	1104387	2430	+	1	8608	3.54239	major facilitator superfamily domain-containing protein, putative
PF3D7_1428300	1105200	1106514	1134	-	2	2735	2.41182	proliferation-associated protein 2g4, putative
PF3D7_1430000	1181664	1182982	990	-	3	2022	2.04242	conserved Plasmodium protein, unknown function
PF3D7_1430200	1188349	1191466	1884	+	8	4720	2.50531	plasmepsin IX
PF3D7_1431400	1233977	1237125	2973	-	2	9132	3.07164	conserved Plasmodium protein, unknown function
PF3D7_1431700	1247030	1247950	498	+	3	5022	10.0843	60S ribosomal protein L14, putative
PF3D7_1432000	1257643	1258971	1329	-	1	2678	2.01505	syntaxin, Qa-SNARE family
PF3D7_1433000	1298639	1298977	168	-	2	415	2.47024	H/ACA ribonucleoprotein complex subunit 3, putative
PF3D7_1433400	1312304	1329577	17274	-	1	49725	2.8786	zinc finger protein, putative
PF3D7_1433500	1332363	1337301	4419	-	4	13471	3.04843	DNA topoisomerase 2
PF3D7_1433600	1341689	1342289	306	+	3	1211	3.95752	signal peptidase complex subunit SPC1, putative
PF3D7_1434200	1368815	1369796	450	-	2	2786	6.19111	calmodulin
PF3D7_1434300	1372903	1374597	1695	+	1	3679	2.1705	Hsp70/Hsp90 organizing protein
PF3D7_1434400	1375624	1376830	858	-	4	3240	3.77622	conserved Plasmodium membrane protein, unknown function
PF3D7_1435200	1419383	1420934	1080	+	4	3135	2.90278	conserved Plasmodium protein, unknown function
PF3D7_1435500	1436280	1437044	765	+	1	2309	3.0183	clathrin light chain, putative
PF3D7_1435600	1437511	1442877	5367	-	1	17429	3.24744	conserved Plasmodium protein, unknown function
PF3D7_1436200	1467629	1474438	6810	-	1	16161	2.37313	conserved Plasmodium protein, unknown function
PF3D7_1436300	1479777	1482758	2982	+	1	25892	8.68276	translocon component PTEX150
PF3D7_1437000	1502648	1504861	1635	+	3	4284	2.62018	N-acetyltransferase, putative
PF3D7_1437200	1507359	1510089	2544	-	2	6534	2.5684	ribonucleoside-diphosphate reductase large subunit, putative
PF3D7_1437300	1513938	1514961	639	-	4	2232	3.49296	conserved Plasmodium protein, unknown function
PF3D7_1437900	1533329	1534947	1275	+	2	4552	3.5702	HSP40, subfamily A
PF3D7_1438000	1536484	1538469	1986	-	1	5725	2.88268	eukaryotic translation initiation factor eIF2A, putative
PF3D7_1438100	1541359	1542872	1134	-	3	3157	2.78395	secretory complex protein 62
PF3D7_1438900	1575984	1576571	588	+	1	1797	3.05612	thioredoxin peroxidase 1
PF3D7_1439000	1578193	1579175	708	+	2	3112	4.39548	copper transporter
PF3D7_1439300	1594505	1600061	5412	+	2	10963	2.02568	Sad1/UNC domain-containing protein, putative
PF3D7_1439600	1612521	1613063	543	-	1	1409	2.59484	conserved Plasmodium protein, unknown function
PF3D7_1439800	1618819	1619794	726	+	2	2818	3.88154	vesicle-associated membrane protein, putative
PF3D7_1439900	1622576	1623612	747	+	2	2529	3.38554	triosephosphate isomerase
PF3D7_1441100	1673386	1674069	684	-	1	6944	10.152	conserved Plasmodium protein, unknown function
PF3D7_1443300	1776010	1776662	306	+	3	764	2.49673	U6 snRNA-associated Sm-like protein LSm5, putative
PF3D7_1443700	1791911	1793004	825	-	2	1669	2.02303	dephospho-CoA kinase, putative
PF3D7_1444300	1828579	1829962	879	+	3	3478	3.95677	1-acyl-sn-glycerol-3-phosphate acyltransferase, putative
PF3D7_1444800	1844041	1845617	1110	-	2	20703	18.6514	fructose-bisphosphate aldolase
PF3D7_1444900	1848315	1848833	519	+	1	1430	2.7553	conserved Plasmodium protein, unknown function
PF3D7_1445400	1862775	1865420	2646	-	1	7073	2.67309	protein serine/threonine kinase-1
PF3D7_1445500	1867616	1868065	450	+	1	1066	2.36889	conserved Plasmodium protein, unknown function
PF3D7_1445600	1871778	1874381	1791	+	5	3716	2.07482	RNA-binding protein, putative
PF3D7_1445700	1875421	1876874	1056	-	3	2909	2.75473	conserved Plasmodium protein, unknown function
PF3D7_1445900	1885443	1888323	1584	+	2	3294	2.07955	ATP-dependent RNA helicase DDX5, putative
PF3D7_1446000	1889413	1889529	117	+	1	3181	27.188	U5 spliceosomal RNA
PF3D7_1446600	1917232	1918010	507	-	3	2855	5.63116	centrin-2
PF3D7_1447000	1929931	1931379	819	+	4	6977	8.51893	40S ribosomal protein S5
PF3D7_1447700	1943936	1944964	1029	-	1	2268	2.20408	conserved Plasmodium protein, unknown function
PF3D7_1449200	2014670	2015055	258	+	2	10414	40.3643	conserved Plasmodium protein, unknown function
PF3D7_1451100	2090902	2093400	2499	+	1	10984	4.39536	elongation factor 2
PF3D7_1451200	2094340	2099736	4515	-	2	22410	4.96346	conserved Plasmodium protein, unknown function
PF3D7_1452000	2134298	2140867	6570	+	1	22810	3.47184	rhoptry neck protein 2
PF3D7_1453700	2207027	2208320	828	+	2	5643	6.81522	co-chaperone p23
PF3D7_1454500	2238394	2238882	489	+	1	1062	2.17178	iron sulfur cluster assembly protein, putative
PF3D7_1455100	2251188	2251934	516	-	3	2655	5.14535	protein tyrosine phosphatase, putative
PF3D7_1455300	2259465	2261297	1833	+	1	3707	2.02237	conserved Plasmodium protein, unknown function
PF3D7_1455400	2262739	2263801	849	-	2	2910	3.42756	hemolysin III
PF3D7_1457000	2336649	2339153	1239	-	9	8438	6.81033	signal peptide peptidase
PF3D7_1457200	2343640	2344218	315	-	2	3463	10.9937	thioredoxin 1
PF3D7_1458100	2390726	2390902	177	+	1	578	3.26554	protein PET117, putative
PF3D7_1458200	2391118	2391601	333	+	2	2099	6.3033	conserved Plasmodium protein, unknown function
PF3D7_1459800	2446983	2448298	732	-	4	3359	4.5888	bax inhibitor 1, putative
PF3D7_1460300	2459214	2459964	204	-	3	2258	11.0686	60S ribosomal protein L29, putative
PF3D7_1460600	2473758	2474204	447	+	1	2204	4.93065	inner membrane complex sub-compartment protein 3
PF3D7_1460700	2475501	2476473	441	-	4	4574	10.3719	60S ribosomal protein L27
PF3D7_1461300	2492166	2492369	204	+	1	2158	10.5784	40S ribosomal protein S28e, putative
PF3D7_1462800	2559098	2560347	1014	+	2	34462	33.9862	glyceraldehyde-3-phosphate dehydrogenase
PF3D7_1463000	2565357	2566283	927	-	1	2484	2.67961	conserved Plasmodium protein, unknown function
PF3D7_1463900	2584575	2589782	3216	-	15	12709	3.9518	EF-hand calcium-binding domain-containing protein, putative
PF3D7_1464600	2619679	2624187	4329	+	2	18674	4.3137	serine/threonine protein phosphatase UIS2, putative
PF3D7_1465000	2635841	2636677	837	+	1	1987	2.37395	conserved Plasmodium protein, unknown function
PF3D7_1465400	2646603	2647033	273	-	2	836	3.06227	conserved Plasmodium protein, unknown function
PF3D7_1465900	2684141	2685534	666	+	3	6888	10.3423	40S ribosomal protein S3
PF3D7_1467800	2767400	2767935	273	+	3	602	2.20513	conserved Plasmodium protein, unknown function
PF3D7_1467900	2771101	2776308	4971	+	3	18109	3.64293	rab GTPase activator, putative
PF3D7_1468100	2786308	2794323	7677	-	2	20824	2.71252	conserved Plasmodium protein, unknown function
PF3D7_1468400	2809478	2812066	2589	+	1	6361	2.45693	zinc finger protein, putative
PF3D7_1468500	2812941	2814385	645	-	6	1603	2.48527	derlin-1
PF3D7_1468700	2825370	2826918	1197	+	4	10791	9.01504	eukaryotic initiation factor 4A
PF3D7_1469200	2838913	2839989	1077	-	1	3630	3.37047	shewanella-like protein phosphatase 1, putative
PF3D7_1469800	2865024	2866245	648	-	3	2313	3.56944	conserved Plasmodium protein, unknown function
PF3D7_1470400	2880157	2881012	390	-	4	1101	2.82308	mitochondrial pyruvate carrier protein 2, putative
PF3D7_1470900	2897916	2898657	588	+	2	2619	4.45408	proteasome subunit beta type-2, putative
PF3D7_1471100	2905163	2906565	864	-	3	12142	14.0532	exported protein 2
PF3D7_1472300	2954108	2957108	1608	+	9	4208	2.61692	conserved Plasmodium membrane protein, unknown function
PF3D7_1474100	3023228	3023726	366	+	2	746	2.03825	mitochondrial ribosomal protein L20 precursor, putative
PF3D7_1474600	3060864	3062634	1185	+	5	2515	2.12236	conserved Plasmodium membrane protein, unknown function
PF3D7_1474800	3067562	3068692	765	+	3	2699	3.5281	proteasome subunit alpha type-1, putative
PF3D7_1476300	3139140	3140982	1719	+	2	9137	5.3153	Plasmodium exported protein (PHISTb), unknown function
PF3D7_1478000	3213581	3214617	849	+	2	1743	2.053	Plasmodium exported protein (PHISTa), unknown function
PF3D7_1478900	3247032	3251019	3988	+	1	30501	7.64819	unspecified product
PFC10_API0029	20722	21150	429	-	1	1224	2.85315	elongation factor Tu
PFC10_API0030	21166	21534	369	-	1	2456	6.65583	probable protein, unknown function
PFC10_API0031	21943	22053	111	-	1	693	6.24324	tRNA Phenylalanine
PFC10_API0032	22019	22294	276	-	1	846	3.06522	tRNA Glutamine
PFC10_API0059	21548	21946	399	-	1	1791	4.48872	small subunit ribosomal RNA

## Sheet: ring stage in vitro-26
Gene	start	end	Length	strand	num_exons	Reads	Load	Description
mal_mito_1	734	1486	753	-	1	12169	16.1607	cytochrome c oxidase subunit 3
mal_mito_2	2035	3471	1437	+	1	52677	36.6576	cytochrome c oxidase subunit 1
mal_mito_3	3492	4622	1131	+	1	33409	29.5393	cytochrome b
mal_mito_RNA19:rRNA	5547	5576	30	-	1	719	23.9667	unspecified product
mal_rna_10:rRNA	1830	1910	81	+	1	18546	228.963	unspecified product
mal_rna_11:rRNA	1916	2023	108	-	1	67973	629.38	unspecified product
mal_rna_12:rRNA	4594	4618	25	-	1	167	6.68	unspecified product
mal_rna_13:rRNA	4996	5025	30	-	1	1296	43.2	unspecified product
mal_rna_14:rRNA	5026	5201	176	-	1	72546	412.193	unspecified product
mal_rna_15:rRNA	5379	5446	68	-	1	27835	409.338	unspecified product
mal_rna_17:rRNA	5577	5771	195	-	1	124362	637.754	unspecified product
mal_rna_18:rRNA	5772	5854	83	-	1	21879	263.602	unspecified product
mal_rna_19:rRNA	5855	5955	101	-	1	80257	794.624	unspecified product
mal_rna_8:rRNA	1650	1688	39	+	1	966	24.7692	unspecified product
mal_rna_9:rRNA	1697	1763	67	+	1	17237	257.269	unspecified product
malmito_rna_1:rRNA	506	593	88	-	1	53209	604.648	unspecified product
malmito_rna_10:rRNA	625	724	100	-	1	52740	527.4	unspecified product
malmito_rna_15:rRNA	594	624	31	-	1	1038	33.4839	unspecified product
malmito_rna_16:rRNA	3	33	31	+	1	381	12.2903	unspecified product
malmito_rna_17:rRNA	126	165	40	+	1	3218	80.45	unspecified product
malmito_rna_20:rRNA	34	71	38	+	1	3031	79.7632	unspecified product
malmito_rna_21:rRNA	1794	1829	36	+	1	6762	187.833	unspecified product
malmito_rna_9:rRNA	72	125	54	+	1	4494	83.2222	unspecified product
malmito_rna_LSUC:rRNA	204	226	23	-	1	1501	65.2609	unspecified product
malmito_rna_LSUF:rRNA	1516	1630	115	+	1	32842	285.583	unspecified product
malmito_rna_LSUG:rRNA	283	389	107	-	1	53370	498.785	unspecified product
malmito_rna_RNA11:rRNA	5284	5340	57	-	1	10919	191.561	unspecified product
malmito_rna_RNA12:rRNA	4887	4945	59	+	1	12329	208.966	unspecified product
malmito_rna_RNA14:rRNA	5508	5548	41	-	1	13711	334.415	unspecified product
malmito_rna_RNA18:rRNA	4964	4988	25	+	1	175	7	unspecified product
malmito_rna_RNA22:rRNA	5341	5378	38	-	1	2151	56.6053	unspecified product
malmito_rna_RNA4:rRNA	4625	4696	72	+	1	3269	45.4028	unspecified product
malmito_rna_RNA5:rRNA	4716	4802	87	+	1	32154	369.586	unspecified product
malmito_rna_RNA6:rRNA	4808	4865	58	+	1	4475	77.1552	unspecified product
malmito_rna_RNA7:rRNA	5202	5283	82	-	1	85361	1040.99	unspecified product
malmito_rna_SSUF:rRNA	5447	5507	61	-	1	6170	101.148	unspecified product
malmito_SSUB:rRNA	390	505	116	-	1	20166	173.845	unspecified product
PF3D7_0102200	98819	102282	3258	+	2	166289	51.0402	ring-infected erythrocyte surface antigen
PF3D7_0102300	104704	105209	354	+	2	1339	3.78249	Plasmodium exported protein, unknown function
PF3D7_0102500	110750	115799	4704	-	4	26489	5.63116	erythrocyte binding antigen-181
PF3D7_0103200	140662	142219	1305	-	2	4268	3.2705	nucleoside transporter 4
PF3D7_0103400	147915	152777	4863	-	1	11054	2.27308	zinc-carboxypeptidase, putative
PF3D7_0104200	182822	184222	1401	-	1	22099	15.7737	StAR-related lipid transfer protein
PF3D7_0104300	190269	201230	10500	+	3	101470	9.66381	ubiquitin carboxyl-terminal hydrolase 1, putative
PF3D7_0104400	202536	204143	1608	+	1	3714	2.3097	4-hydroxy-3-methylbut-2-enyl diphosphate reductase
PF3D7_0104900	218517	218824	308	-	1	1731	5.62013	RNase MRP
PF3D7_0105000	218894	219223	330	-	1	1184	3.58788	unspecified product
PF3D7_0105300	225110	225779	489	-	2	4520	9.24335	cyclase-associated protein
PF3D7_0105400.1	226681	227285	423	-	2	1923	4.5461	conserved Plasmodium protein, unknown function
PF3D7_0105400.2	226681	227285	402	-	2	1846	4.59204	conserved Plasmodium protein, unknown function
PF3D7_0105800	249231	252010	2499	-	2	8406	3.36375	conserved Plasmodium protein, unknown function
PF3D7_0105900	253584	254930	1347	+	1	2798	2.07721	3'-5' exonuclease, putative
PF3D7_0106000	255775	258543	2769	-	1	6957	2.51246	conserved Plasmodium protein, unknown function
PF3D7_0106100	260658	261809	1152	-	1	2479	2.15191	V-type proton ATPase subunit C, putative
PF3D7_0106300	265208	269173	3687	-	3	10856	2.9444	calcium-transporting ATPase
PF3D7_0106400	272454	273404	471	+	4	971	2.06157	pre-rRNA-processing protein TSR2, putative
PF3D7_0106900	290386	292590	2205	+	1	4819	2.18549	2-C-methyl-D-erythritol 4-phosphate cytidylyltransferase, putative
PF3D7_0107500	304362	309257	4413	-	4	46161	10.4602	lipid/sterol:H+ symporter
PF3D7_0108000	328431	329558	657	-	4	2217	3.37443	proteasome subunit beta type-3, putative
PF3D7_0108300	337168	343833	6666	+	1	27226	4.08431	conserved Plasmodium protein, unknown function
PF3D7_0108500	349170	349709	540	+	1	14462	26.7815	conserved Plasmodium protein, unknown function
PF3D7_0108600	349995	351626	921	-	6	4150	4.50597	conserved Plasmodium protein, unknown function
PF3D7_0108700	352314	356211	3459	-	4	8573	2.47846	secreted ookinete protein, putative
PF3D7_0108900	361987	362586	600	-	1	11528	19.2133	unspecified product
PF3D7_0109000	363318	363992	675	+	1	10167	15.0622	photosensitized INA-labeled protein PHIL1, putative
PF3D7_0110300	393216	393490	275	-	1	582	2.11636	Plasmodium RNA of unknown function RUF5
PF3D7_0110400	393875	394835	750	-	2	2425	3.23333	DNA-directed RNA polymerase II subunit RPB9, putative
PF3D7_0110600	405739	412169	5133	+	7	17717	3.45159	phosphatidylinositol-4-phosphate 5-kinase
PF3D7_0110700	413760	415100	1341	-	1	2716	2.02535	chromatin assembly factor 1 protein WD40 domain, putative
PF3D7_0111500	439652	441418	1116	-	5	3386	3.03405	UMP-CMP kinase, putative
PF3D7_0111900	450043	450646	246	-	3	913	3.71138	conserved protein, unknown function
PF3D7_0112700	477279	481382	4104	+	1	219813	53.5607	28S ribosomal RNA
PF3D7_0112900	486500	487186	567	+	2	1400	2.46914	Plasmodium exported protein, unknown function
PF3D7_0113000	487892	490127	2022	-	2	10892	5.38675	glutamic acid-rich protein
PF3D7_0202000	103385	105796	1965	-	2	31165	15.8601	knob-associated histidine-rich protein
PF3D7_0202100	109564	110580	909	-	2	4935	5.42904	liver stage associated protein 2
PF3D7_0202200	112547	113682	873	-	2	1955	2.2394	EMP1-trafficking protein
PF3D7_0202500	127994	128314	321	+	1	34291	106.826	early transcribed membrane protein 2
PF3D7_0203000	141625	147564	5940	-	1	26452	4.4532	repetitive organellar protein, putative
PF3D7_0203400	162065	162900	276	-	4	607	2.19928	conserved Plasmodium protein, unknown function
PF3D7_0204100	182228	189115	6888	-	1	20497	2.97575	conserved Plasmodium protein, unknown function
PF3D7_0204200	192818	194199	831	+	5	9836	11.8363	conserved Plasmodium protein, unknown function
PF3D7_0204700	205889	207403	1515	-	1	3110	2.05281	hexose transporter
PF3D7_0205700.1	231141	232529	618	+	5	1330	2.1521	RNA-binding protein, putative
PF3D7_0205700.2	231141	232529	669	+	6	1392	2.08072	RNA-binding protein, putative
PF3D7_0205800	232729	233476	363	-	3	977	2.69146	PH domain-containing protein, putative
PF3D7_0205900	235237	238816	2901	+	4	11283	3.88935	26S proteasome regulatory subunit RPN1, putative
PF3D7_0206000	239246	243796	4551	-	1	9655	2.12151	DNA repair protein RAD2, putative
PF3D7_0206100	245358	246699	750	+	4	2118	2.824	cysteine desulfuration protein SufE
PF3D7_0206200	249030	250727	1698	+	1	5245	3.08893	pantothenate transporter
PF3D7_0206700	271594	273009	1416	+	1	11336	8.00565	adenylosuccinate lyase
PF3D7_0206800	273689	274507	819	-	1	42609	52.0256	merozoite surface protein 2
PF3D7_0206900.1	275540	276494	819	-	2	5935	7.24664	merozoite surface protein 5
PF3D7_0206900.2	275540	276577	786	-	3	5779	7.35242	merozoite surface protein 5
PF3D7_0207000	277494	278456	819	-	2	18284	22.3248	merozoite surface protein 4
PF3D7_0207100	281907	287345	5238	+	3	25632	4.89347	conserved Plasmodium protein, unknown function
PF3D7_0207200	288183	288665	483	-	1	1158	2.39752	iron-sulfur assembly protein, putative
PF3D7_0207400	294273	297616	2841	-	4	9120	3.21014	serine repeat antigen 7
PF3D7_0207500	298897	302564	3096	-	4	13356	4.31395	serine repeat antigen 6
PF3D7_0207600	303593	307027	2994	-	4	78513	26.2234	serine repeat antigen 5
PF3D7_0208400	343308	349340	6033	-	1	20910	3.46594	conserved Plasmodium protein, unknown function
PF3D7_0208500	352836	353628	414	+	3	1162	2.80676	acyl carrier protein
PF3D7_0208600	354621	356117	1497	+	1	3464	2.31396	ribosome-recycling factor
PF3D7_0209700	400153	401859	1707	-	1	4168	2.44171	RING zinc finger protein, putative
PF3D7_0209800	404281	406355	1374	-	2	8545	6.21907	ATP-dependent RNA helicase UAP56
PF3D7_0210000	409983	410228	246	+	1	2545	10.3455	secretory complex protein 61 gamma subunit
PF3D7_0210100.1	412275	412859	291	+	3	4327	14.8694	60S ribosomal protein L37ae, putative
PF3D7_0210100.2	412275	412741	108	+	3	590	5.46296	60S ribosomal protein L37ae, putative
PF3D7_0210600	432041	434086	1341	-	5	13961	10.4109	conserved Plasmodium protein, unknown function
PF3D7_0210700	436050	436994	945	+	1	2595	2.74603	syntaxin, Qa-SNARE family
PF3D7_0210800	437755	439002	1248	-	1	2540	2.03526	conserved Plasmodium protein, unknown function
PF3D7_0210900	442080	442934	855	-	1	3746	4.38129	conserved Plasmodium protein, unknown function
PF3D7_0211800	475242	477074	1833	+	1	3972	2.16694	asparagine--tRNA ligase
PF3D7_0211900	477432	479091	1353	-	3	2995	2.2136	conserved Plasmodium protein, unknown function
PF3D7_0212500	509525	521746	11973	+	2	29050	2.42629	conserved Plasmodium protein, unknown function
PF3D7_0212600	522931	523999	753	+	2	5789	7.68792	secreted protein with altered thrombospondin repeat domain
PF3D7_0212900	533253	534350	1098	+	1	3859	3.51457	arginyl-tRNA--protein transferase
PF3D7_0213000	535646	536146	501	+	1	1823	3.63872	conserved Plasmodium protein, unknown function
PF3D7_0213100	537789	539420	987	+	3	2394	2.42553	protein SIS1
PF3D7_0213200	540409	540969	381	-	2	862	2.26247	conserved Plasmodium protein, unknown function
PF3D7_0214100	568529	573315	4416	-	4	10762	2.43705	protein transport protein SEC31
PF3D7_0214600	594196	599340	5145	+	1	22048	4.28533	serine/threonine protein kinase, putative
PF3D7_0214700	599829	601712	906	-	9	2274	2.50993	conserved Plasmodium protein, unknown function
PF3D7_0214900	610625	615372	2853	+	15	18443	6.46442	rhoptry neck protein 6
PF3D7_0215400	634589	637507	2919	-	1	8753	2.99863	conserved Plasmodium protein, unknown function
PF3D7_0216600	686485	688545	2061	+	1	6316	3.06453	MtN3-like protein
PF3D7_0216700.1	690311	695783	4152	+	7	15931	3.83695	autophagy-related protein 11, putative
PF3D7_0216700.2	690311	695783	4134	+	7	15853	3.83478	autophagy-related protein 11, putative
PF3D7_0217300	715798	716549	426	-	3	1102	2.58685	AP-2 complex subunit sigma, putative
PF3D7_0217400	717692	718281	447	+	2	1199	2.68233	conserved Plasmodium protein, unknown function
PF3D7_0217500	720437	722661	1575	+	5	12711	8.07048	calcium-dependent protein kinase 1
PF3D7_0217800	734272	734595	324	+	1	2869	8.85494	40S ribosomal protein S26
PF3D7_0218000	738860	739852	993	+	1	2422	2.43907	replication factor C subunit 2, putative
PF3D7_0218100	741014	742459	1068	+	4	2173	2.03464	conserved Plasmodium membrane protein, unknown function
PF3D7_0218300	747566	749365	1065	-	4	2276	2.13709	rRNA methyltransferase, putative
PF3D7_0218500	752966	753439	306	+	2	933	3.04902	small nuclear ribonucleoprotein Sm D2, putative
PF3D7_0218700	763491	765191	1449	-	2	3053	2.10697	pre-mRNA-processing protein 45, putative
PF3D7_0218800	766390	767015	626	-	1	5205	8.3147	ribonuclease P
PF3D7_0218900	767584	767743	160	-	1	1894	11.8375	Plasmodium RNA of unknown function RUF2
PF3D7_0219000	767977	768058	82	-	1	888	10.8293	small nucleolar RNA snoR01
PF3D7_0219200	772316	772690	177	+	2	2661	15.0339	40S ribosomal protein S30
PF3D7_0219300	773335	773754	420	-	1	982	2.3381	conserved Plasmodium protein, unknown function
PF3D7_0219400.1	774815	776036	306	+	3	3025	9.88562	ribosome associated membrane protein RAMP4, putative, unspecified product
PF3D7_0219400.2	775639	776036	204	+	2	1797	8.80882	ribosome associated membrane protein RAMP4, putative, unspecified product
PF3D7_0219800	786870	787940	960	-	2	3032	3.15833	Plasmodium exported protein (PHISTc), unknown function
PF3D7_0219900	791464	792381	693	+	2	1980	2.85714	Plasmodium exported protein, unknown function
PF3D7_0220000	796752	801586	4677	+	2	75736	16.1933	liver stage antigen 3
PF3D7_0220200	809511	810298	543	-	2	7550	13.9042	Plasmodium exported protein, unknown function
PF3D7_0220500	823825	824864	816	-	2	2090	2.56127	Plasmodium exported protein (hyp2), unknown function
PF3D7_0220700	833805	834688	759	+	2	2105	2.77339	Plasmodium exported protein (hyp9), unknown function
PF3D7_0220800	838843	844116	4323	+	9	13690	3.16678	cytoadherence linked asexual protein 2
PF3D7_0301700	96568	97907	954	-	2	2961	3.10377	Plasmodium exported protein, unknown function
PF3D7_0302200	119458	124735	4251	+	9	48721	11.4611	cytoadherence linked asexual protein 3.2
PF3D7_0302500	135418	140660	4254	+	9	87908	20.6648	cytoadherence linked asexual protein 3.1
PF3D7_0303200	169571	174300	3489	+	5	22056	6.32158	HAD superfamily protein, putative
PF3D7_0303700	191245	192591	1347	-	1	2983	2.21455	lipoamide acyltransferase component of branched-chain alpha-keto acid dehydrogenase complex
PF3D7_0304100	204542	206119	1578	+	1	4551	2.88403	inner membrane complex protein 1e, putative
PF3D7_0304400	217941	218489	315	+	2	4728	15.0095	60S ribosomal protein L44
PF3D7_0305200	251242	254661	3420	+	1	11376	3.32632	conserved Plasmodium protein, unknown function
PF3D7_0305300	255276	258416	2871	-	3	7327	2.55207	conserved Plasmodium membrane protein, unknown function
PF3D7_0305500	261485	273286	11802	-	1	31661	2.68268	conserved Plasmodium protein, unknown function
PF3D7_0305600	275864	277717	1854	-	1	5484	2.95793	AP endonuclease (DNA-[apurinic or apyrimidinic site] lyase), putative
PF3D7_0305700	278956	279828	429	-	3	2311	5.38695	ubiquitin-conjugating enzyme E2, putative
PF3D7_0306300	295107	296094	336	-	5	1522	4.52976	glutaredoxin 1
PF3D7_0306700	304317	304999	351	+	4	1177	3.35328	membrane magnesium transporter, putative
PF3D7_0306900	310652	311805	438	+	3	7214	16.4703	40S ribosomal protein S23, putative
PF3D7_0307100	312693	313342	426	-	2	3370	7.9108	40S ribosomal protein S12, putative
PF3D7_0307200	314976	316236	774	-	3	7122	9.20155	60S ribosomal protein L7, putative
PF3D7_0307400	321050	322162	1113	-	1	4084	3.66936	ATP-dependent Clp protease proteolytic subunit
PF3D7_0307700	328787	335269	5481	-	7	15088	2.75278	conserved Plasmodium protein, unknown function
PF3D7_0308100	356319	361454	5136	+	1	14752	2.87227	zinc finger protein, putative
PF3D7_0308200	362342	364233	1620	-	2	3256	2.00988	T-complex protein 1 subunit eta
PF3D7_0308300	365659	366672	1014	-	1	4651	4.58679	conserved Plasmodium protein, unknown function
PF3D7_0308400	368572	368690	119	+	1	453	3.80672	U4 spliceosomal RNA
PF3D7_0308500	369925	370789	423	+	3	2752	6.50591	activator of Hsp90 ATPase, putative
PF3D7_0308600	372632	374230	1599	+	1	4715	2.94872	pre-mRNA-processing factor 19, putative
PF3D7_0308700	375806	377437	1479	+	2	3582	2.42191	conserved Plasmodium protein, unknown function
PF3D7_0308800	378045	378517	327	+	2	1204	3.68196	conserved protein, unknown function
PF3D7_0309500	402933	405440	1833	+	2	6454	3.521	asparagine synthetase [glutamine-hydrolyzing], putative
PF3D7_0309600	407980	408318	339	+	1	8313	24.5221	60S acidic ribosomal protein P2
PF3D7_0310200	427290	440942	13653	+	1	42479	3.11133	phd finger protein, putative
PF3D7_0310400	447500	451384	3885	+	1	18133	4.66744	parasite-infected erythrocyte surface protein
PF3D7_0310600.1	461175	462027	708	-	2	1807	2.55226	eukaryotic translation initiation factor 3 subunit K, putative, unspecified product
PF3D7_0310600.2	461175	462027	705	-	2	1807	2.56312	eukaryotic translation initiation factor 3 subunit K, putative, unspecified product
PF3D7_0310700	463326	464274	438	+	2	1801	4.11187	trafficking protein particle complex subunit 4, putative
PF3D7_0310800	464662	464991	330	+	1	1421	4.30606	conserved Plasmodium protein, unknown function
PF3D7_0311300	480122	483453	2862	-	4	9907	3.46157	phosphatidylinositol 3- and 4-kinase, putative
PF3D7_0311500	497118	497363	246	-	1	730	2.96748	conserved Plasmodium protein, unknown function
PF3D7_0312300	521969	522883	915	+	1	2554	2.79126	26S proteasome regulatory subunit RPN12, putative
PF3D7_0312400	524154	526439	1323	-	7	7845	5.92971	glycogen synthase kinase 3
PF3D7_0312800	534239	535238	381	+	3	4485	11.7717	60S ribosomal protein L26, putative
PF3D7_0313100	539743	542810	2424	+	4	4951	2.04249	ubiquitin-protein ligase, putative
PF3D7_0314000	567247	568850	828	+	7	2091	2.52536	co-chaperone p23
PF3D7_0314100.1	569308	571051	597	-	8	1907	3.1943	vesicle transport v-SNARE protein, putative
PF3D7_0314100.2	570283	571051	213	-	4	732	3.43662	vesicle transport v-SNARE protein, putative
PF3D7_0314600	586555	587331	777	+	1	2499	3.21622	conserved Plasmodium protein, unknown function
PF3D7_0315100	612739	613422	684	-	1	1578	2.30702	eukaryotic translation initiation factor 4E
PF3D7_0315400	630611	631381	771	-	1	5489	7.11933	conserved Plasmodium protein, unknown function
PF3D7_0315900	644186	645268	834	+	2	2694	3.23022	conserved Plasmodium protein, unknown function
PF3D7_0316000	645921	646844	924	-	1	3722	4.02814	microneme associated antigen
PF3D7_0316100	648635	649531	897	+	1	4572	5.09699	mitochondrial ribosomal protein L27 precursor, putative
PF3D7_0316300.1	660020	661643	1143	+	3	8432	7.37708	inorganic pyrophosphatase, inorganic pyrophosphatase, putative
PF3D7_0316300.2	658272	661643	1296	+	5	8931	6.8912	inorganic pyrophosphatase, inorganic pyrophosphatase, putative
PF3D7_0316600	669302	670873	930	-	4	6391	6.87204	formate-nitrite transporter
PF3D7_0316700	674458	675636	666	+	2	2018	3.03003	protein YOP1, putative
PF3D7_0316800	677842	678474	393	+	2	5038	12.8193	40S ribosomal protein S15A, putative
PF3D7_0316900	679234	681277	1803	-	2	8916	4.94509	E3 ubiquitin-protein ligase, putative
PF3D7_0317000	682795	683685	759	-	2	3690	4.86166	proteasome subunit alpha type-3, putative
PF3D7_0317200	690154	694815	4662	-	1	15250	3.27113	cdc2-related protein kinase 4
PF3D7_0317300	699544	709728	10185	-	1	37095	3.64212	conserved Plasmodium protein, unknown function
PF3D7_0317600	725015	726130	486	+	3	6105	12.5617	40S ribosomal protein S11, putative
PF3D7_0318700	788453	788812	360	+	1	2438	6.77222	conserved Plasmodium protein, unknown function
PF3D7_0318900	791840	793481	1323	-	3	4285	3.23885	conserved protein, unknown function
PF3D7_0319100	802260	802583	324	-	1	1140	3.51852	E3 ubiquitin-protein ligase RBX1, putative
PF3D7_0319600	817913	818695	471	+	3	2427	5.15287	elongation factor 1-delta, putative
PF3D7_0320000	837307	838271	435	+	5	1497	3.44138	protein phosphatase inhibitor 2
PF3D7_0320500	860813	862102	1290	+	1	7075	5.4845	nicotinamidase, putative
PF3D7_0320600	862741	863832	399	-	5	2263	5.67168	conserved Plasmodium protein, unknown function
PF3D7_0320700	865014	866420	540	+	8	2836	5.25185	signal peptidase complex subunit SPC2, putative
PF3D7_0320900	875213	876295	477	+	3	17542	36.7757	histone H2A.Z
PF3D7_0321000	877735	879511	1479	+	2	3484	2.35565	conserved Plasmodium protein, unknown function
PF3D7_0321200	886962	888976	1194	-	7	2393	2.00419	UDP-N-acetylglucosamine--dolichyl-phosphate N-acetylglucosaminephosphotransferase, putative
PF3D7_0321400	894761	896112	960	+	4	3197	3.33021	protein kinase, putative
PF3D7_0321600	900857	903369	2208	+	2	5797	2.62545	ATP-dependent RNA helicase DDX42, putative
PF3D7_0321800	912916	921036	8121	+	1	18090	2.22756	WD repeat-containing protein, putative
PF3D7_0322000	928644	929159	516	-	1	7884	15.2791	peptidyl-prolyl cis-trans isomerase
PF3D7_0322300	938212	940173	1962	-	1	4485	2.28593	diacylglycerol O-acyltransferase
PF3D7_0322900	965553	966502	789	-	2	9930	12.5856	40S ribosomal protein S3A, putative
PF3D7_0323000	968675	969202	165	-	3	997	6.04242	translation machinery-associated protein 7, putative
PF3D7_0323400	980706	983966	3261	-	1	17093	5.24164	Rh5 interacting protein
PF3D7_0323500	986265	987610	948	+	4	4005	4.22468	survival motor neuron-like protein
PF3D7_0400200	38955	40154	1200	+	1	3553	2.96083	erythrocyte membrane protein 1 (PfEMP1), exon 2, pseudogene
PF3D7_0401600.1	92576	93809	1044	-	2	4345	4.16188	rifin
PF3D7_0401600.2	92576	93809	1041	-	2	4345	4.17387	rifin
PF3D7_0402000	114601	116058	1287	-	2	5010	3.89277	Plasmodium exported protein (PHISTa), unknown function
PF3D7_0402100	123588	125464	1728	-	2	16474	9.53356	Plasmodium exported protein (PHISTb), unknown function
PF3D7_0402200	127712	134468	6663	-	2	22308	3.34804	surface-associated interspersed protein 4.1 (SURFIN 4.1), pseudogene
PF3D7_0402300	137640	146653	8916	+	2	67937	7.61967	reticulocyte binding protein homologue 1
PF3D7_0402400	147490	148380	765	-	2	9919	12.966	Plasmodium exported protein, unknown function
PF3D7_0403300	180430	181551	459	-	5	1050	2.28758	conserved Plasmodium protein, unknown function
PF3D7_0403800	211650	213854	2205	-	1	17501	7.93696	alpha/beta hydrolase, putative
PF3D7_0403900	219087	222838	3561	+	2	7974	2.23926	SET domain protein, putative
PF3D7_0404000	223711	224131	300	-	2	2024	6.74667	conserved Plasmodium protein, unknown function
PF3D7_0404300	234014	237013	1896	-	9	4587	2.4193	conserved Plasmodium protein, unknown function
PF3D7_0404700	260454	263418	2820	-	2	30847	10.9387	dipeptidyl aminopeptidase 3
PF3D7_0404800	264305	266170	1704	-	2	5018	2.94484	conserved Plasmodium protein, unknown function
PF3D7_0404900	267244	268380	1137	-	1	11754	10.3377	6-cysteine protein
PF3D7_0405200	279072	281983	1740	+	9	11096	6.37701	ag-1 blood stage membrane protein homologue
PF3D7_0405900	316540	319178	2196	-	4	20450	9.31239	apical sushi protein
PF3D7_0406000	321019	322545	1527	+	1	3671	2.40406	conserved Plasmodium protein, unknown function
PF3D7_0406100	323267	325225	1485	-	2	5362	3.61077	V-type proton ATPase subunit B
PF3D7_0406200	329216	329689	474	+	1	19289	40.6941	sexual stage-specific protein precursor
PF3D7_0406400	332043	333856	792	+	7	1873	2.3649	cytosolic glyoxalase II
PF3D7_0407700	377481	383087	4890	-	6	16070	3.2863	conserved Plasmodium protein, unknown function
PF3D7_0407800	384924	390806	5883	+	1	29567	5.02584	conserved Plasmodium protein, unknown function
PF3D7_0407900	391347	393350	2004	-	1	10630	5.30439	AAA family ATPase, putative
PF3D7_0408000	394065	394580	516	-	1	4880	9.45736	conserved Plasmodium protein, unknown function
PF3D7_0408100	397328	400693	3366	+	1	7852	2.33274	conserved Plasmodium protein, unknown function
PF3D7_0409100	436217	437981	1605	-	2	4575	2.85047	U4/U6 small nuclear ribonucleoprotein PRP31, putative
PF3D7_0409700	456922	458020	585	+	4	1873	3.20171	peptide chain release factor 2
PF3D7_0409800	459710	461437	1728	+	1	9693	5.60938	zinc finger protein, putative
PF3D7_0410100	469218	469299	82	+	1	408	4.97561	tRNA Serine
PF3D7_0410700	481177	483891	2715	-	1	14057	5.17753	ribosome biogenesis GTPase A, putative
PF3D7_0410800	485832	489728	3897	+	1	12326	3.16295	conserved Plasmodium protein, unknown function
PF3D7_0413500	615356	616243	888	+	1	4111	4.6295	phosphoglucomutase-2
PF3D7_0413600	616914	618350	1179	-	2	7739	6.56404	26S protease regulatory subunit 6B, putative
PF3D7_0413700	619786	620802	1017	-	1	4091	4.02262	lysine decarboxylase-like protein, putative
PF3D7_0413900	623168	626226	2562	-	4	5465	2.1331	ubiquitin carboxyl-terminal hydrolase 13, putative
PF3D7_0414600	658620	659538	708	-	2	2764	3.90395	acylated pleckstrin-homology domain-containing protein, putative
PF3D7_0414700	660624	662519	1896	+	1	5637	2.9731	GTP-binding protein, putative
PF3D7_0414800	663416	664015	600	-	1	2320	3.86667	conserved Plasmodium protein, unknown function
PF3D7_0414900	665973	668147	828	+	11	8902	10.7512	armadillo-domain containing rhoptry protein
PF3D7_0415400	686414	687040	627	-	1	2533	4.03987	coatomer subunit zeta, putative
PF3D7_0415700	691131	692516	1386	-	1	5581	4.0267	conserved Plasmodium protein, unknown function
PF3D7_0415800	693906	696533	2628	+	1	5993	2.28044	RING zinc finger protein, putative
PF3D7_0415900	697918	698768	618	-	2	11307	18.2961	60S ribosomal protein L15, putative
PF3D7_0416000	701526	704162	1740	-	7	6977	4.00977	RNA-binding protein, putative
PF3D7_0416100	706529	709009	2481	+	1	7202	2.90286	glutamyl-tRNA(Gln) amidotransferase subunit A
PF3D7_0416400	718202	722654	3780	+	4	9967	2.63677	histone acetyltransferase, putative
PF3D7_0416500	723073	724242	1170	-	1	3195	2.73077	repressor of RNA polymerase III transcription MAF1
PF3D7_0416700	727710	727979	270	-	1	1675	6.2037	CDGSH iron-sulfur domain-containing protein, putative
PF3D7_0416800	729962	731223	579	+	3	7269	12.5544	small GTP-binding protein sar1
PF3D7_0417300	750860	753712	2409	-	4	6091	2.52844	LETM1-like protein, putative
PF3D7_0417400	756294	776603	20310	+	1	59741	2.94146	conserved Plasmodium protein, unknown function
PF3D7_0417500	777200	779424	891	-	12	2177	2.44332	memo-like protein
PF3D7_0418200	817400	818689	1290	+	1	3153	2.44419	eukaryotic translation initiation factor 3 subunit M, putative
PF3D7_0418300	819362	822340	2979	-	1	33307	11.1806	conserved Plasmodium protein, unknown function
PF3D7_0418600	834394	840429	6036	+	1	20312	3.36514	regulator of chromosome condensation, putative
PF3D7_0418700	841196	842905	1710	+	1	3703	2.1655	RNA-binding protein NOB1, putative
PF3D7_0419200	854879	855289	411	+	1	1656	4.0292	protein transport protein GOT1, putative
PF3D7_0419600	870737	871873	843	+	2	4965	5.88968	ran-specific GTPase-activating protein 1, putative
PF3D7_0419700	873138	874115	978	+	1	9915	10.138	apical merozoite protein
PF3D7_0419800	874811	875521	711	-	1	4900	6.8917	60S ribosomal protein L7ae/L30e, putative
PF3D7_0419900	878022	893866	15108	+	6	52082	3.44731	phosphatidylinositol 4-kinase, putative
PF3D7_0420000	894612	904724	10113	-	1	21233	2.09957	zinc finger protein, putative
PF3D7_0420300	917990	928411	10422	+	1	50619	4.85694	AP2 domain transcription factor, putative
PF3D7_0420400	929340	930140	801	+	1	1658	2.06991	ribosome-recycling factor
PF3D7_0420500	930404	931608	597	-	6	1218	2.0402	conserved Plasmodium protein, unknown function
PF3D7_0420600	932463	934244	1782	+	1	4326	2.42761	conserved Plasmodium protein, unknown function
PF3D7_0422400	1026648	1027399	513	+	2	7239	14.1111	40S ribosomal protein S19
PF3D7_0423000	1047696	1048478	783	+	1	1912	2.44189	conserved Plasmodium protein, unknown function
PF3D7_0423100	1049270	1049894	441	-	2	1725	3.91156	AP-4 complex subunit sigma, putative
PF3D7_0423200	1050407	1050974	411	+	2	852	2.07299	BSD-domain protein, putative
PF3D7_0423300	1051576	1053006	1431	-	1	8397	5.86792	conserved Plasmodium protein, unknown function
PF3D7_0423400	1055665	1056318	654	+	1	3562	5.44648	apical asparagine-rich protein AARP
PF3D7_0423500	1058997	1060551	1119	+	2	10568	9.44415	glideosome associated protein with multiple membrane spans 2
PF3D7_0423600	1061790	1066628	4839	-	1	10708	2.21285	conserved Plasmodium protein, unknown function
PF3D7_0423700	1071435	1071845	411	-	1	6359	15.472	early transcribed membrane protein 4
PF3D7_0423800	1076347	1077534	1089	+	2	4363	4.00643	cysteine-rich protective antigen
PF3D7_0423900	1077926	1078488	423	-	2	1978	4.67612	probable protein, unknown function
PF3D7_0424100	1082363	1084150	1581	-	2	20730	13.112	reticulocyte binding protein homologue 5
PF3D7_0424200	1085979	1091277	5151	-	2	23261	4.51582	reticulocyte binding protein homologue 4
PF3D7_0424500	1110060	1112293	1869	+	3	5364	2.86998	serine/threonine protein kinase, FIKK family
PF3D7_0424600	1113345	1114486	930	-	2	17093	18.3796	Plasmodium exported protein (PHISTb), unknown function
PF3D7_0424700	1118430	1122414	3669	+	3	9873	2.69092	serine/threonine protein kinase, FIKK family
PF3D7_0424900	1127779	1128802	852	+	2	3058	3.5892	Plasmodium exported protein (PHISTa), unknown function
PF3D7_0425100	1134415	1135175	618	-	2	1743	2.82039	Plasmodium exported protein (hyp6), unknown function
PF3D7_0500800	43327	47761	4305	-	2	70460	16.367	mature parasite-infected erythrocyte surface antigen
PF3D7_0501000	55841	56872	783	+	2	5117	6.53512	Plasmodium exported protein, unknown function
PF3D7_0501100.1	58037	59726	1209	-	4	6155	5.09098	heat shock protein 40, type II
PF3D7_0501100.2	58037	59726	1173	-	4	5984	5.10145	heat shock protein 40, type II
PF3D7_0501200	64065	65489	1227	+	2	4131	3.36675	parasite-infected erythrocyte surface protein
PF3D7_0501300	68930	70113	1014	+	2	9245	9.11736	skeleton-binding protein 1
PF3D7_0501400	74509	79842	5163	+	2	30761	5.95797	interspersed repeat antigen
PF3D7_0501500	81134	82336	1203	-	1	14242	11.8387	rhoptry-associated protein 3
PF3D7_0501600	84041	85237	1197	-	1	34642	28.9407	rhoptry-associated protein 2
PF3D7_0502100	102193	102897	705	-	1	1533	2.17447	HCNGP-like protein
PF3D7_0502400	109898	111691	1794	-	1	4406	2.45596	merozoite surface protein 8
PF3D7_0502900	123332	123904	249	-	3	752	3.02008	Tim10/DDP family zinc finger protein, putative
PF3D7_0503000	125116	126514	789	+	5	2558	3.24208	50S ribosomal protein L28, apicoplast, putative
PF3D7_0503300	135004	135930	927	-	1	4585	4.94606	serine/arginine-rich splicing factor 12
PF3D7_0503400	140710	141471	369	+	2	12191	33.0379	actin-depolymerizing factor 1
PF3D7_0503600	146639	150131	2406	-	8	4957	2.06027	myosin B
PF3D7_0503800	151422	152384	363	-	3	3603	9.92562	60S ribosomal protein L31
PF3D7_0504200	167649	169502	1509	+	3	3024	2.00398	ATP-dependent RNA helicase DDX27, putative
PF3D7_0504900	206450	208375	519	+	9	1091	2.10212	conserved protein, unknown function
PF3D7_0505300	233815	235650	1836	+	1	3708	2.01961	UDP-N-acetylglucosamine transporter, putative
PF3D7_0505700	247801	250575	2775	-	1	6905	2.48829	conserved Plasmodium membrane protein, unknown function
PF3D7_0505800	252047	252606	303	-	2	4470	14.7525	small ubiquitin-related modifier
PF3D7_0506100	257748	258831	615	-	3	1320	2.14634	60S ribosomal subunit protein L24, putative
PF3D7_0506900	288776	291055	2280	-	1	22826	10.0114	rhomboid protease ROM4
PF3D7_0507100	294668	295903	1236	-	1	22606	18.2896	60S ribosomal protein L4
PF3D7_0507200	298427	300736	2310	-	1	6508	2.81732	subtilisin-like protease 3
PF3D7_0507300	301930	304611	2682	-	1	9715	3.6223	PIMMS2 protein, putative
PF3D7_0507400	305961	306422	462	-	1	1321	2.85931	conserved Plasmodium protein, unknown function
PF3D7_0507500	307490	309556	2067	-	1	12140	5.87325	subtilisin-like protease 1
PF3D7_0507700	316766	318361	1596	-	1	3206	2.00877	nuclear protein localization protein 4, putative
PF3D7_0507800	322239	326822	4584	+	1	15488	3.37871	conserved Plasmodium protein, unknown function
PF3D7_0507900	327656	328316	354	+	3	723	2.04237	conserved Plasmodium protein, unknown function
PF3D7_0508000	328666	329715	1050	-	1	6580	6.26667	6-cysteine protein
PF3D7_0508100	331680	336704	5025	+	1	13131	2.61313	SET domain protein, putative
PF3D7_0508600	356222	357010	789	+	1	2837	3.59569	conserved Plasmodium protein, unknown function
PF3D7_0508800	363588	364442	855	-	1	2777	3.24795	single-stranded DNA-binding protein
PF3D7_0508900	367022	376426	9405	+	1	41763	4.44051	conserved Plasmodium protein, unknown function
PF3D7_0509000	376855	378452	897	-	5	1799	2.00557	alpha-soluble NSF attachment protein, putative
PF3D7_0509100	381077	386203	5127	+	1	12924	2.52077	structural maintenance of chromosomes protein 4, putative
PF3D7_0509300	388696	389191	348	-	2	878	2.52299	conserved Plasmodium protein, unknown function
PF3D7_0509800	410268	415308	4680	+	4	16190	3.4594	phosphatidylinositol 4-kinase
PF3D7_0510100	422746	430353	7608	-	1	37740	4.96057	conserved Plasmodium protein, unknown function
PF3D7_0510500	445983	448502	2520	-	1	5435	2.15675	topoisomerase I
PF3D7_0510900	465782	465939	158	+	1	402	2.5443	small nucleolar RNA snoR04
PF3D7_0511000	467585	468100	516	-	1	3501	6.78488	translationally-controlled tumor protein homolog
PF3D7_0511200	471055	474058	2850	+	2	9245	3.24386	stearoyl-CoA desaturase
PF3D7_0511500	486602	516787	30186	+	1	133332	4.41701	RNA pseudouridylate synthase, putative
PF3D7_0511600	517259	517885	627	-	1	2668	4.25518	apical rhoptry neck protein
PF3D7_0511800	520720	522693	1815	-	2	6506	3.58457	inositol-3-phosphate synthase
PF3D7_0512600	544540	545993	603	+	6	1931	3.20232	ras-related protein Rab-1B
PF3D7_0513100	557039	558012	756	-	3	2546	3.36772	conserved Plasmodium protein, unknown function
PF3D7_0513200	559513	568384	8292	+	4	17517	2.11252	conserved Plasmodium protein, unknown function
PF3D7_0513300	569182	569919	738	-	1	5086	6.8916	purine nucleoside phosphorylase
PF3D7_0513600	574941	578505	3342	-	2	11018	3.29683	deoxyribodipyrimidine photo-lyase, putative
PF3D7_0513800	585357	585980	624	-	1	1481	2.3734	ras-related protein Rab-1A
PF3D7_0515400	637354	640381	2286	+	6	8732	3.81977	conserved Plasmodium protein, unknown function
PF3D7_0515700	653966	655336	1371	-	1	34040	24.8286	glideosome-associated protein 40, putative
PF3D7_0515900	660150	661136	987	-	1	2745	2.78116	NLI interacting factor-like phosphatase, putative
PF3D7_0516200	675809	676614	456	-	3	4858	10.6535	40S ribosomal protein S11
PF3D7_0516600	686810	691642	4833	-	1	10404	2.1527	sporozoite surface antigen MB2
PF3D7_0516700	694492	698778	3999	+	3	9119	2.28032	ubiquitin carboxyl-terminal hydrolase 2, putative
PF3D7_0516800	700120	707256	7137	-	1	22925	3.21213	AP2 domain transcription factor AP2-O2, putative
PF3D7_0516900	712762	713772	783	-	2	10400	13.2822	60S ribosomal protein L2
PF3D7_0517000	715765	716675	498	-	2	5997	12.0422	60S ribosomal protein L12, putative
PF3D7_0517300	724681	725751	897	-	2	5185	5.78038	serine/arginine-rich splicing factor 1
PF3D7_0517700	743179	745329	2151	+	1	4804	2.23338	eukaryotic translation initiation factor 3 subunit B, putative
PF3D7_0518000	750661	752435	813	+	6	1626	2	NOSIP domain-containing protein, putative
PF3D7_0518200	758503	758898	396	-	1	2442	6.16667	SWIB/MDM2 domain-containing protein
PF3D7_0518300	759831	760998	723	-	4	4329	5.98755	proteasome subunit beta type-1, putative
PF3D7_0519200	791719	792936	498	-	5	7327	14.7129	V-type proton ATPase 16 kDa proteolipid subunit
PF3D7_0519400	798036	798775	402	-	2	9221	22.9378	40S ribosomal protein S24
PF3D7_0519700	817066	819139	579	+	3	6405	11.0622	FoP domain-containing protein, putative
PF3D7_0519800	820719	822908	2007	-	2	4014	2	EELM2 domain-containing protein, putative
PF3D7_0520000	828953	829883	570	+	3	6986	12.2561	40S ribosomal protein S9, putative
PF3D7_0520600	843586	844817	459	-	5	939	2.04575	bis(5'-nucleosyl)-tetraphosphatase [asymmetrical]
PF3D7_0520900	857038	858477	1440	+	1	10170	7.0625	adenosylhomocysteinase
PF3D7_0521300	870184	874570	4038	-	3	8145	2.01709	zinc finger protein, putative
PF3D7_0522000	896018	896940	324	+	4	1108	3.41975	conserved Plasmodium protein, unknown function
PF3D7_0522200	901414	902173	351	+	4	1143	3.25641	transcription initiation factor TFIID subunit 10, putative
PF3D7_0522400	907837	936315	27924	+	4	59845	2.14314	conserved Plasmodium protein, unknown function
PF3D7_0522500	937231	938037	501	+	3	1186	2.36727	50S ribosomal protein L17, apicoplast, putative
PF3D7_0523000	957890	962149	4260	+	1	17230	4.0446	multidrug resistance protein 1
PF3D7_0523300	970266	970962	393	-	3	896	2.2799	conserved Plasmodium protein, unknown function
PF3D7_0523400	973518	975876	1602	+	4	4620	2.8839	DnaJ protein, putative
PF3D7_0523900	993433	994607	612	-	3	2014	3.29085	conserved Plasmodium membrane protein, unknown function
PF3D7_0524000	998753	1002124	3372	+	1	24140	7.15896	karyopherin beta
PF3D7_0524500	1016198	1016569	372	+	1	1389	3.73387	conserved Plasmodium protein, unknown function
PF3D7_0524600	1017809	1018582	774	+	1	2787	3.60078	50S ribosomal protein L12, apicoplast, putative
PF3D7_0525100	1041745	1043766	2022	+	1	5153	2.54847	acyl-CoA synthetase
PF3D7_0525200	1045462	1051253	5550	+	3	13608	2.45189	structural maintenance of chromosomes protein 6, putative
PF3D7_0525700	1068516	1069285	396	+	2	3649	9.21465	conserved Plasmodium protein, unknown function
PF3D7_0525800	1071247	1072149	903	+	1	30400	33.6656	inner membrane complex protein 1g, putative
PF3D7_0526200.1	1081558	1083816	1521	-	6	3139	2.06377	ADP-ribosylation factor GTPase-activating protein, putative
PF3D7_0526200.2	1081558	1083816	1518	-	6	3139	2.06785	ADP-ribosylation factor GTPase-activating protein, putative
PF3D7_0526300	1085623	1086594	972	-	1	2084	2.14403	WD repeat-containing protein, putative
PF3D7_0526800	1120704	1121810	1107	-	1	2488	2.24752	conserved Plasmodium protein, unknown function
PF3D7_0526900	1123610	1124595	645	+	4	2561	3.97054	transmembrane emp24 domain-containing protein, putative
PF3D7_0527000	1125099	1128146	2889	-	2	9143	3.16476	DNA replication licensing factor MCM3, putative
PF3D7_0527100	1129959	1130754	459	-	4	2454	5.34641	ubiquitin-conjugating enzyme E2 N, putative
PF3D7_0527200	1132937	1134854	1818	-	2	9015	4.95875	ubiquitin carboxyl-terminal hydrolase 14
PF3D7_0527400	1140627	1141154	528	+	1	1997	3.7822	conserved Plasmodium protein, unknown function
PF3D7_0527500	1143618	1145359	1377	+	2	9741	7.07407	Hsc70-interacting protein
PF3D7_0527600	1145857	1148810	1368	-	11	4992	3.64912	conserved Plasmodium protein, unknown function
PF3D7_0528000	1156205	1156579	375	-	1	2095	5.58667	proteasome maturation factor UMP1, putative
PF3D7_0528200	1163408	1165072	1554	-	2	7858	5.05663	eukaryotic translation initiation factor 3 subunit E, putative
PF3D7_0528400	1171659	1173890	1221	+	8	7512	6.15233	palmitoyltransferase DHHC7
PF3D7_0528600	1176969	1177286	318	-	1	1122	3.5283	conserved Plasmodium protein, unknown function
PF3D7_0528700	1178276	1178890	615	-	1	1358	2.20813	peptidyl-prolyl cis-trans isomerase
PF3D7_0529000	1186787	1188946	2160	-	1	5017	2.32269	conserved Plasmodium protein, unknown function
PF3D7_0529400.1	1199165	1205187	4749	+	9	21670	4.56307	conserved Plasmodium protein, unknown function
PF3D7_0529400.2	1199165	1205187	4509	+	10	19912	4.41606	conserved Plasmodium protein, unknown function
PF3D7_0529800	1213533	1219376	5721	+	2	11445	2.00052	conserved Plasmodium protein, unknown function
PF3D7_0529900	1220777	1221992	855	-	3	8443	9.87485	RING zinc finger protein, putative
PF3D7_0530000	1224598	1224891	294	-	1	875	2.97619	conserved Plasmodium protein, unknown function
PF3D7_0530100	1226883	1227757	678	+	2	2691	3.96903	SNARE protein, putative
PF3D7_0530200	1229077	1230651	1575	-	1	3600	2.28571	phosphoenolpyruvate/phosphate translocator
PF3D7_0531500	1288559	1289308	750	+	1	1523	2.03067	unspecified product
PF3D7_0531600	1289601	1291692	2092	+	1	20448	9.77438	18S ribosomal RNA
PF3D7_0531800	1292052	1292210	159	+	1	1103	6.93711	5.8S ribosomal RNA
PF3D7_0532000	1292410	1296199	3790	+	1	1265222	333.832	28S ribosomal RNA
PF3D7_0532100	1301224	1301769	546	+	1	17172	31.4505	early transcribed membrane protein 5
PF3D7_0532300	1308278	1309940	1530	+	2	5194	3.39477	Plasmodium exported protein (PHISTb), unknown function
PF3D7_0532400	1312471	1314154	1587	+	2	3571	2.25016	lysine-rich membrane-associated PHISTb protein
PF3D7_0601600	68833	69693	861	-	1	2301	2.67247	tetratricopeptide repeat protein, putative
PF3D7_0601900	78190	78784	387	+	2	1004	2.59432	conserved Plasmodium protein, unknown function
PF3D7_0602900	118638	120203	1413	-	2	3533	2.50035	conserved Plasmodium protein, unknown function
PF3D7_0603000	122634	124412	1779	+	1	5012	2.81731	conserved Plasmodium protein, unknown function
PF3D7_0604100	171301	177240	5940	-	1	22350	3.76263	AP2 domain transcription factor
PF3D7_0604500	189012	198078	8625	+	4	48817	5.65994	conserved Plasmodium protein, unknown function
PF3D7_0605100	217240	219507	2268	+	1	5744	2.53263	RNA-binding protein, putative
PF3D7_0605900	247640	249166	882	+	5	4198	4.75964	long chain polyunsaturated fatty acid elongation enzyme, putative
PF3D7_0606000	250612	253803	3192	-	1	10510	3.29261	conserved Plasmodium protein, unknown function
PF3D7_0606100	257604	259974	1749	+	4	4590	2.62436	RNA-binding protein, putative
PF3D7_0606200	261031	261945	468	-	4	1614	3.44872	ubiquitin-conjugating enzyme E2, putative
PF3D7_0606300	262826	263194	369	+	1	1077	2.9187	conserved Plasmodium protein, unknown function
PF3D7_0606800	288377	289276	900	-	1	2358	2.62	VFT protein
PF3D7_0607000	293864	296797	2934	+	1	15476	5.27471	translation initiation factor IF-2, putative
PF3D7_0607600	313856	316882	2586	-	5	6541	2.52939	spindle assembly abnormal protein 6, putative
PF3D7_0607700	320740	328998	8259	+	1	23321	2.82371	conserved Plasmodium protein, unknown function
PF3D7_0608400	349946	350515	321	-	2	905	2.81931	conserved Plasmodium protein, unknown function
PF3D7_0608500	351780	352775	708	-	2	2953	4.1709	proteasome subunit alpha type-2, putative
PF3D7_0608700	358391	360203	1632	+	2	4843	2.96752	T-complex protein 1 subunit zeta
PF3D7_0608800	362635	363879	1245	+	1	11129	8.93896	ornithine aminotransferase
PF3D7_0609000	370261	388494	18234	+	1	39589	2.17116	conserved Plasmodium protein, unknown function
PF3D7_0609100	388915	390748	1077	-	7	2215	2.05664	zinc transporter ZIP1, putative
PF3D7_0609700	413652	419781	5706	+	3	20319	3.56099	conserved Plasmodium protein, unknown function
PF3D7_0609800	421157	422622	855	-	4	5899	6.89942	palmitoyltransferase DHHC2, putative
PF3D7_0610100	434807	436465	1335	-	3	3174	2.37753	pre-mRNA-splicing factor SLU7, putative
PF3D7_0610400	444747	445157	411	+	1	247110	601.241	histone H3
PF3D7_0610800	453671	455689	2019	+	1	5279	2.61466	transketolase
PF3D7_0610900	456747	460589	3843	-	1	9986	2.59849	transcription elongation factor SPT5, putative
PF3D7_0611600	485114	487066	1953	-	1	8524	4.36457	basal complex transmembrane protein 1
PF3D7_0611700	488579	489287	156	-	3	1780	11.4103	60S ribosomal protein L39
PF3D7_0611900	506380	507198	531	+	3	1165	2.19397	lsm12, putative
PF3D7_0612200	512972	519548	5595	-	8	16000	2.8597	leucine-rich repeat protein
PF3D7_0612600	523657	525105	1449	-	1	3076	2.12284	cytoplasmic tRNA 2-thiolation protein 1, putative
PF3D7_0612700	525987	527030	1044	-	1	10110	9.68391	6-cysteine protein
PF3D7_0612900	531126	533186	2061	+	1	4459	2.16351	nucleolar GTP-binding protein 1, putative
PF3D7_0613000.3	533907	535364	357	-	5	844	2.36415	conserved Plasmodium protein, unknown function
PF3D7_0613100	537778	538585	237	+	4	973	4.10549	conserved Plasmodium protein, unknown function
PF3D7_0613300	540077	544798	4269	-	4	20766	4.86437	rhoptry protein ROP14
PF3D7_0613400	546964	547741	642	+	2	3785	5.89564	50S ribosomal protein L18, apicoplast, putative
PF3D7_0613700	559349	561460	2112	-	1	4462	2.11269	syntaxin-binding protein, putative
PF3D7_0613800	566139	578993	12330	+	3	68594	5.56318	AP2 domain transcription factor, putative
PF3D7_0613900	579435	585896	6462	-	1	38592	5.97214	myosin E, putative
PF3D7_0614000	587019	588635	1617	-	1	5559	3.43785	thiamine-phosphate synthase, putative
PF3D7_0614300	597484	600517	2562	-	4	11816	4.61202	major facilitator superfamily-related transporter, putative
PF3D7_0614400	604573	605340	768	+	1	2170	2.82552	pre-mRNA-splicing factor CWF7, putative
PF3D7_0614500	606142	607259	549	-	3	6877	12.5264	60S ribosomal protein L19
PF3D7_0614700	612471	614398	1815	+	2	4279	2.35758	conserved Plasmodium protein, unknown function
PF3D7_0614900	617762	621536	3291	+	3	8500	2.5828	conserved Plasmodium membrane protein, unknown function
PF3D7_0615400	630956	640174	8190	-	9	23695	2.89316	ribonuclease, putative
PF3D7_0615500	644052	646169	2118	+	1	6687	3.15722	cdc2-related protein kinase 5
PF3D7_0616200	674118	676375	1776	+	5	4961	2.79336	kinetochore protein NDC80, putative
PF3D7_0617100	710059	714576	3711	+	7	8574	2.31043	AP-2 complex subunit alpha, putative
PF3D7_0617200	717050	718917	1341	+	4	10162	7.57793	conserved Plasmodium protein, unknown function
PF3D7_0617300	720535	721312	420	+	3	944	2.24762	conserved Plasmodium protein, unknown function
PF3D7_0617800	748416	748814	399	-	1	578823	1450.68	histone H2A
PF3D7_0617900	754395	754805	411	+	1	43058	104.764	histone H3 variant
PF3D7_0618000	758609	760996	2388	+	1	12301	5.15117	conserved Plasmodium membrane protein, unknown function
PF3D7_0618200	764667	765492	600	-	2	1366	2.27667	conserved Plasmodium protein, unknown function
PF3D7_0618300	768792	769456	447	+	2	6087	13.6174	60S ribosomal protein L27a, putative
PF3D7_0619400	815622	818247	2487	-	2	8254	3.31886	cell division cycle protein 48 homologue, putative
PF3D7_0620300	848405	850864	2460	-	1	5348	2.17398	conserved Plasmodium protein, unknown function
PF3D7_0620400	851378	852955	1578	-	1	3942	2.4981	merozoite surface protein 10
PF3D7_0620700	859026	860114	1089	-	1	2501	2.2966	DnaJ protein, putative
PF3D7_0621100	865845	869909	4065	-	1	11113	2.73383	conserved Plasmodium protein, unknown function
PF3D7_0621200	871297	872202	906	-	1	4699	5.18653	pyridoxine biosynthesis protein PDX1
PF3D7_0621800	891997	892777	555	+	3	6210	11.1892	nascent polypeptide-associated complex subunit alpha, putative
PF3D7_0621900	893450	895780	2331	-	1	5397	2.31532	signal recognition particle subunit SRP68, putative
PF3D7_0622600	914743	915429	291	+	4	986	3.38832	cytochrome b-c1 complex subunit 9, putative
PF3D7_0622800	919685	924028	4344	+	1	9765	2.24793	leucine--tRNA ligase, putative
PF3D7_0622900	925105	931074	5970	-	1	23837	3.9928	AP2 domain transcription factor AP2Tel
PF3D7_0623100	939660	943720	2361	-	12	6987	2.95934	nuclear polyadenylated RNA-binding protein NAB2, putative
PF3D7_0623300	947493	948644	711	-	4	1895	2.66526	EGF-like membrane protein, putative
PF3D7_0623800	963741	970955	7215	-	1	41480	5.74913	tyrosine kinase-like protein, putative
PF3D7_0623900	977183	978049	867	+	1	2041	2.35409	ribonuclease H2 subunit A, putative
PF3D7_0624000	981066	982547	1482	+	1	6300	4.25101	hexokinase
PF3D7_0624200	985047	986870	1026	-	7	2138	2.08382	conserved Plasmodium protein, unknown function
PF3D7_0624500	994284	994553	270	+	1	2233	8.27037	anaphase-promoting complex subunit 11, putative
PF3D7_0624600	999524	1007683	8160	+	1	54011	6.619	SNF2 helicase, putative
PF3D7_0625400	1032536	1033774	1239	-	1	4258	3.43664	conserved Plasmodium protein, unknown function
PF3D7_0625500	1035358	1036371	1014	+	1	2282	2.25049	conserved Plasmodium membrane protein, unknown function
PF3D7_0626800	1078995	1081320	1536	+	3	20633	13.4329	pyruvate kinase
PF3D7_0627100	1089190	1094328	5139	+	1	17283	3.36311	ankyrin-repeat protein, putative
PF3D7_0627300	1097300	1098649	1350	-	1	6791	5.03037	E3 ubiquitin-protein ligase RNF5, putative
PF3D7_0627500	1101734	1102852	570	-	3	2281	4.00175	protein DJ-1
PF3D7_0627700	1108197	1111640	3444	+	1	8809	2.55778	transportin
PF3D7_0628100	1122801	1153664	30864	-	1	111638	3.61709	HECT-domain (ubiquitin-transferase), putative
PF3D7_0628200	1159862	1169080	9219	+	1	32275	3.50092	eukaryotic translation initiation factor 2-alpha kinase
PF3D7_0628300	1170813	1173696	1176	-	12	34926	29.699	choline/ethanolaminephosphotransferase, putative
PF3D7_0629200	1199853	1200995	1143	-	1	5721	5.00525	DnaJ protein, putative
PF3D7_0629500	1213948	1216005	1821	-	2	5140	2.82262	amino acid transporter, putative
PF3D7_0629600	1218307	1219251	780	+	2	1618	2.07436	RNA-binding protein, putative
PF3D7_0629700	1221941	1242922	20262	+	6	48413	2.38935	SET domain protein, putative
PF3D7_0629900	1250412	1251651	987	+	3	2451	2.48328	sec14-like cytosolic factor or phosphatidylinositol/phosphatidylcholine transfer protein, putative
PF3D7_0631000	1295474	1296331	858	+	1	2455	2.86131	tetratricopeptide repeat protein, putative
PF3D7_0701900	79890	82943	2895	-	2	14871	5.13679	Plasmodium exported protein, unknown function
PF3D7_0702000	84797	85674	738	+	2	3921	5.31301	Plasmodium exported protein (hyp12), unknown function
PF3D7_0702100	88685	90886	2017	+	2	5944	2.94695	Plasmodium exported protein (PHISTb), unknown function, pseudogene
PF3D7_0702200	91867	93141	1275	-	1	3887	3.04863	lysophospholipase, putative
PF3D7_0702400	101694	102285	372	+	2	1466	3.94086	small exported membrane protein 1
PF3D7_0703500	135606	142505	6900	+	1	18443	2.6729	erythrocyte membrane-associated antigen
PF3D7_0703600	144019	145953	789	+	10	2886	3.65779	conserved Plasmodium protein, unknown function
PF3D7_0703700	146645	147394	750	-	1	2143	2.85733	conserved Plasmodium protein, unknown function
PF3D7_0704100	180036	190715	10680	+	1	48914	4.57996	conserved Plasmodium membrane protein, unknown function
PF3D7_0704300	197691	203249	5559	+	1	21507	3.86886	conserved Plasmodium membrane protein, unknown function
PF3D7_0704500	208690	213501	4812	-	1	13953	2.89963	serine/threonine protein kinase, putative
PF3D7_0704600	216024	229072	11682	-	8	49649	4.25004	E3 ubiquitin-protein ligase
PF3D7_0705300	261977	264454	2478	+	1	5562	2.24455	origin recognition complex subunit 2, putative
PF3D7_0705500	270022	278706	8445	-	2	39136	4.63422	inositol-phosphate phosphatase, putative
PF3D7_0705700	285472	286166	165	-	3	1556	9.4303	40S ribosomal protein S29, putative
PF3D7_0705900	290100	291220	501	-	4	2220	4.43114	ATP synthase subunit C, putative
PF3D7_0706000	293400	297089	3690	+	1	14361	3.89187	importin-7, putative
PF3D7_0706300	305563	306032	357	+	2	2941	8.2381	conserved Plasmodium protein, unknown function
PF3D7_0706400	306855	307133	279	-	1	5086	18.2294	60S ribosomal protein L37
PF3D7_0706500	309902	315022	5121	-	1	16700	3.26108	conserved Plasmodium protein, unknown function
PF3D7_0707300	338885	342083	2586	+	5	117299	45.3592	rhoptry-associated membrane antigen
PF3D7_0707500	348277	353082	4806	+	1	15132	3.14856	conserved Plasmodium protein, unknown function
PF3D7_0707600	353986	354720	735	+	1	1599	2.17551	conserved Plasmodium protein, unknown function
PF3D7_0707700	357700	360585	2886	+	1	12601	4.36625	E3 ubiquitin-protein ligase, putative
PF3D7_0707900	366929	367708	780	+	1	2514	3.22308	ribosomal protein S8e, putative
PF3D7_0708400	381592	384614	2238	+	2	40812	18.2359	heat shock protein 90
PF3D7_0708800	395711	398332	2622	+	1	13357	5.0942	heat shock protein 110
PF3D7_0708900	399290	400243	954	-	1	2101	2.20231	protein SCO1, putative
PF3D7_0709000	403222	406317	1275	+	13	3113	2.44157	chloroquine resistance transporter
PF3D7_0709050	406820	407448	629	-	1	9862	15.6789	small nucleolar RNA
PF3D7_0709100	408215	411961	3747	+	1	8988	2.39872	Cg1 protein
PF3D7_0709700	435089	436195	1107	-	1	2447	2.21048	prodrug activation and resistance esterase
PF3D7_0709800	437900	438094	195	+	1	405	2.07692	conserved protein, unknown function
PF3D7_0710200	463105	471837	8733	+	1	29394	3.36585	conserved Plasmodium protein, unknown function
PF3D7_0710600	478468	479138	453	-	2	5406	11.9338	60S ribosomal protein L34
PF3D7_0710700	481369	481974	606	-	1	1797	2.96535	conserved Plasmodium protein, unknown function
PF3D7_0711100	492519	493232	714	-	1	1602	2.2437	conserved Plasmodium membrane protein, unknown function
PF3D7_0713400	612458	613740	1074	+	2	2603	2.42365	GPCR-like receptor SR25
PF3D7_0713700	621463	623521	630	-	9	1899	3.01429	conserved Plasmodium protein, unknown function
PF3D7_0713800	624379	625300	723	-	2	2643	3.6556	negative elongation factor A, putative
PF3D7_0713900	627067	637776	10710	-	1	23587	2.20233	conserved Plasmodium protein, unknown function
PF3D7_0714000	643101	643472	372	-	1	22461	60.379	histone H2B variant
PF3D7_0715800	695600	696904	1305	-	1	3502	2.68352	drug/metabolite transporter DMT1, putative
PF3D7_0715900	699239	700909	1671	+	1	3586	2.14602	cation diffusion facilitator family protein, putative
PF3D7_0716300	717281	718968	1569	+	2	17586	11.2084	conserved Plasmodium protein, unknown function
PF3D7_0716800	732070	733496	984	-	3	3910	3.97358	eukaryotic translation initiation factor 3 subunit I, putative
PF3D7_0716900	736370	737338	969	+	1	2059	2.12487	drug/metabolite transporter DMT2
PF3D7_0717000	738578	741209	897	+	14	2128	2.37235	conserved Plasmodium membrane protein, unknown function
PF3D7_0717200	745191	746663	1296	-	2	6112	4.71605	conserved Plasmodium protein, unknown function
PF3D7_0717300	748990	750699	1179	+	4	3429	2.9084	transcription initiation factor IIE subunit alpha, putative
PF3D7_0717400	751877	754132	2256	+	1	5299	2.34885	queuine tRNA-ribosyltransferase, putative
PF3D7_0717500	755763	757696	1587	+	2	8013	5.04915	calcium-dependent protein kinase 4
PF3D7_0717600	758720	762877	3162	-	8	7874	2.4902	conserved Plasmodium protein, unknown function
PF3D7_0717700	764794	766413	1620	-	1	6230	3.84568	serine--tRNA ligase, putative
PF3D7_0718400	822438	823015	390	+	2	1813	4.64872	mitochondrial ribosomal protein S8 precursor, putative
PF3D7_0718500	824445	825884	579	+	6	2025	3.49741	prefoldin subunit 3, putative
PF3D7_0719400	848398	853593	5196	-	1	14119	2.71728	conserved Plasmodium protein, unknown function
PF3D7_0719500	854652	856654	1416	-	3	3988	2.81638	LEM3/CDC50 family protein, putative
PF3D7_0719600	858742	859492	522	-	2	5060	9.69349	60S ribosomal protein L11a, putative
PF3D7_0719700	861583	862487	414	+	3	5692	13.7488	40S ribosomal protein S10, putative
PF3D7_0720500	886346	887487	405	+	6	1037	2.56049	conserved Plasmodium protein, unknown function
PF3D7_0720600	887816	889378	711	-	7	1770	2.48945	conserved Plasmodium protein, unknown function
PF3D7_0720700	891683	899051	6501	+	4	33959	5.22366	phosphoinositide-binding protein, putative
PF3D7_0720800	899751	901137	597	+	7	1287	2.15578	Ham1-like protein, putative
PF3D7_0721000	904143	914671	10380	+	2	21089	2.0317	conserved Plasmodium membrane protein, unknown function
PF3D7_0721100	916434	917168	735	+	1	6905	9.39456	conserved Plasmodium protein, unknown function
PF3D7_0721400	926692	928028	645	+	6	1299	2.01395	conserved Plasmodium protein, unknown function
PF3D7_0721600	931459	932164	588	-	2	7882	13.4048	40S ribosomal protein S5, putative
PF3D7_0721800	938279	938895	321	+	3	866	2.69782	conserved Plasmodium protein, unknown function
PF3D7_0721900	939715	940250	237	-	3	548	2.31224	V-type ATPase V0 subunit e, putative
PF3D7_0722000	941776	942513	738	+	1	1907	2.58401	conserved Plasmodium protein, unknown function
PF3D7_0722200	946363	948612	2250	+	1	50428	22.4124	rhoptry-associated leucine zipper-like protein 1
PF3D7_0722500	956920	958017	876	-	2	2173	2.48059	pre-mRNA-splicing factor CWC15, putative
PF3D7_0722600	958886	960694	1809	-	1	4144	2.29077	U3 small nucleolar RNA-associated protein 7, putative
PF3D7_0722700	962031	962447	240	+	2	570	2.375	conserved Plasmodium protein, unknown function
PF3D7_0723400	978920	983188	4269	-	1	8677	2.03256	conserved Plasmodium protein, unknown function
PF3D7_0723800	993232	1000233	6573	+	4	25368	3.85942	conserved Plasmodium protein, unknown function
PF3D7_0724100	1013295	1016449	3012	-	2	6152	2.0425	conserved Plasmodium protein, unknown function
PF3D7_0724800	1047427	1049362	1278	-	4	2948	2.30673	kelch domain-containing protein, putative
PF3D7_0725200	1070980	1071737	447	+	4	958	2.14318	mago nashi protein homologue, putative
PF3D7_0725400	1079015	1080055	330	+	4	17270	52.3333	conserved Plasmodium protein, unknown function
PF3D7_0725600	1083761	1085847	2087	+	1	20632	9.88596	18S ribosomal RNA
PF3D7_0725800	1086213	1086371	159	+	1	1102	6.93082	5.8S ribosomal RNA
PF3D7_0726000	1086570	1090357	3788	+	1	1278452	337.501	28S ribosomal RNA
PF3D7_0726100	1093566	1096122	2412	-	2	5215	2.16211	Plasmodium exported protein, unknown function
PF3D7_0726500	1126556	1136577	9552	-	4	28060	2.9376	ubiquitin carboxyl-terminal hydrolase, putative
PF3D7_0726700	1143303	1143815	513	-	1	1175	2.29045	conserved Plasmodium protein, unknown function
PF3D7_0727400	1162710	1163831	771	+	3	3568	4.62776	proteasome subunit alpha type-5, putative
PF3D7_0728000	1191179	1192289	990	-	2	3786	3.82424	eukaryotic translation initiation factor 2 subunit alpha, putative
PF3D7_0728400.1	1215174	1215763	381	+	2	1344	3.52756	conserved Plasmodium protein, unknown function
PF3D7_0728400.2	1215174	1215763	381	+	2	1352	3.54856	conserved Plasmodium protein, unknown function
PF3D7_0730300	1297459	1301454	3996	+	1	29718	7.43694	AP2 domain transcription factor AP2-L, putative
PF3D7_0730400	1304347	1305096	477	+	3	3146	6.59539	IMP1-like protein, putative
PF3D7_0730500	1305894	1314215	8322	-	1	17211	2.06813	conserved Plasmodium protein, unknown function
PF3D7_0730800.1	1321306	1322367	882	+	2	11448	12.9796	Plasmodium exported protein, unknown function, unspecified product
PF3D7_0730800.2	1321306	1322367	882	+	2	11447	12.9785	Plasmodium exported protein, unknown function, unspecified product
PF3D7_0730900	1325375	1331813	6333	+	2	27436	4.33223	EMP1-trafficking protein
PF3D7_0731000	1333175	1334938	1764	-	1	9557	5.4178	unspecified product
PF3D7_0731100	1338959	1341790	2673	+	2	13315	4.98129	EMP1-trafficking protein
PF3D7_0731200	1342842	1343996	930	-	2	3025	3.25269	Plasmodium exported protein, unknown function
PF3D7_0731300	1350032	1351149	954	+	2	6065	6.35744	Plasmodium exported protein (PHISTb), unknown function
PF3D7_0731400	1353758	1355482	1605	+	2	12257	7.63676	serine/threonine protein kinase, FIKK family, pseudogene
PF3D7_0731500	1358055	1362929	4509	+	4	86279	19.1348	erythrocyte binding antigen-175
PF3D7_0731600	1368161	1370596	2436	+	1	14787	6.0702	acyl-CoA synthetase
PF3D7_0801800	119032	122067	3036	-	1	11718	3.85968	mannose-6-phosphate isomerase, putative
PF3D7_0802000	146089	150282	4194	+	1	13854	3.30329	glutamate dehydrogenase, putative
PF3D7_0802100	151808	159668	7734	-	2	24450	3.16137	AP2 domain transcription factor, putative
PF3D7_0802200	165416	166078	663	+	1	3028	4.56712	1-cys peroxiredoxin
PF3D7_0802500	174647	178906	4260	-	1	8705	2.04343	inositol 5-phosphatase, putative
PF3D7_0802600	180563	188113	6840	+	5	22477	3.28611	adenylyl cyclase beta
PF3D7_0802800	191976	194103	1815	+	2	5247	2.89091	serine/threonine protein phosphatase 2B catalytic subunit A
PF3D7_0803000	196581	198614	2034	+	1	4215	2.07227	peptidyl-prolyl cis-trans isomerase
PF3D7_0803100	199181	202918	3738	-	1	8518	2.27876	U3 small nucleolar RNA-associated protein 14, putative
PF3D7_0803200	204241	206661	2187	-	2	12608	5.76497	filament assembling protein, putative
PF3D7_0803500	217888	222291	4404	+	1	9750	2.2139	AAA family ATPase, putative
PF3D7_0803600	223762	230209	4800	+	15	11208	2.335	conserved Plasmodium protein, unknown function
PF3D7_0803800	233467	234426	798	-	2	6292	7.88471	proteasome subunit beta type-4
PF3D7_0803900	236442	236571	130	-	1	4467	34.3615	C/D small nucleolar RNA
PF3D7_0804000	237853	241048	2409	+	3	10644	4.41843	cactin homolog, putative
PF3D7_0804500	250083	268437	18105	+	2	44761	2.4723	conserved Plasmodium membrane protein, unknown function
PF3D7_0805200	290902	291183	282	+	1	3992	14.156	gamete release protein, putative
PF3D7_0805300	293113	296871	3759	-	1	13834	3.68023	conserved Plasmodium protein, unknown function
PF3D7_0805600	312034	312960	927	+	1	6285	6.77994	PAP2-like protein, putative
PF3D7_0806500	345427	347454	2028	-	1	4508	2.22288	DnaJ protein, putative
PF3D7_0806800	363260	366421	3162	-	1	28228	8.92726	V-type proton ATPase subunit a, putative
PF3D7_0807300	381564	382847	606	+	4	2261	3.73102	ras-related protein Rab-18
PF3D7_0807400	384298	385797	576	+	5	1644	2.85417	coenzyme Q-binding protein COQ10 homolog, mitochondrial
PF3D7_0807500	387219	388364	783	+	3	5614	7.16986	proteasome subunit alpha type-6, putative
PF3D7_0807600	389596	394259	4005	-	4	11742	2.93184	conserved Plasmodium protein, unknown function
PF3D7_0807800	399591	401360	1446	-	2	5156	3.5657	26S proteasome regulatory subunit RPN10, putative
PF3D7_0807900	402595	404141	1122	+	3	3674	3.27451	tyrosine--tRNA ligase
PF3D7_0808200	416344	418065	1722	-	1	11987	6.96109	plasmepsin X
PF3D7_0808300	421493	422640	717	+	3	5228	7.29149	ubiquitin regulatory protein, putative
PF3D7_0808400	423527	424536	837	+	2	3056	3.65114	coatomer subunit epsilon, putative
PF3D7_0809300	474253	475285	1033	-	1	3622	3.50629	unspecified product
PF3D7_0810000	517421	517693	273	-	1	1275	4.67033	acyl-CoA binding protein, putative
PF3D7_0810300	525058	527604	1653	-	4	18550	11.222	protein phosphatase PPM5, putative
PF3D7_0810600	541971	544796	2826	+	1	6513	2.30467	ATP-dependent RNA helicase DBP1, putative
PF3D7_0810900.1	551199	552428	1038	-	2	4074	3.92486	conserved Plasmodium protein, unknown function
PF3D7_0810900.2	551867	552428	366	-	2	1429	3.90437	conserved Plasmodium protein, unknown function
PF3D7_0811200	560744	564276	3402	+	2	9722	2.85773	ER membrane protein complex subunit 1, putative
PF3D7_0811300	567824	573148	5325	+	1	34109	6.40545	CCR4-associated factor 1
PF3D7_0811400	575986	578370	1827	+	4	4238	2.31965	conserved protein, unknown function
PF3D7_0811600	582983	586953	3633	-	2	11920	3.28103	conserved Plasmodium protein, unknown function
PF3D7_0812400	621805	623442	1638	-	1	5649	3.44872	karyopherin alpha
PF3D7_0812500	626069	628945	2877	-	1	9340	3.24644	RNA-binding protein, putative
PF3D7_0813000	643086	644885	1800	-	1	9234	5.13	conserved Plasmodium protein, unknown function
PF3D7_0813300	656078	657630	948	+	2	5666	5.97679	conserved Plasmodium protein, unknown function
PF3D7_0813400	658493	662095	1980	-	6	7032	3.55152	conserved Plasmodium protein, unknown function
PF3D7_0813900	677989	678725	435	-	2	4899	11.2621	40S ribosomal protein S16, putative
PF3D7_0814000	680957	681809	648	+	2	13010	20.0772	60S ribosomal protein L13-2, putative
PF3D7_0814100	682518	683572	447	-	6	1026	2.2953	conserved Plasmodium protein, unknown function
PF3D7_0814200	687340	688086	747	+	1	22135	29.6319	DNA/RNA-binding protein Alba 1
PF3D7_0814900	708228	708824	597	+	1	1614	2.70352	superoxide dismutase [Fe]
PF3D7_0815500	727662	729728	1476	+	5	3850	2.6084	conserved Plasmodium protein, unknown function
PF3D7_0815600	729917	732187	807	-	10	4339	5.3767	eukaryotic translation initiation factor 3 subunit G, putative
PF3D7_0815800	735680	741181	5502	-	1	24415	4.43748	vacuolar protein sorting-associated protein 9, putative
PF3D7_0816100	748653	749623	558	+	4	1292	2.31541	phosphopantothenoylcysteine decarboxylase, putative
PF3D7_0817200	777257	779647	2391	-	1	5049	2.11167	conserved Plasmodium protein, unknown function
PF3D7_0817500	798777	800205	558	+	6	4968	8.90323	protein kinase c inhibitor-like protein, putative
PF3D7_0817600	800920	804034	2889	-	2	16267	5.63067	conserved Plasmodium protein, unknown function
PF3D7_0817700	805797	813465	3471	-	31	13069	3.7652	rhoptry neck protein 5
PF3D7_0817800	815150	815451	165	+	2	761	4.61212	conserved Plasmodium protein, unknown function
PF3D7_0817900	816803	817102	300	-	1	19422	64.74	high mobility group protein B2
PF3D7_0818100	824564	826518	1617	+	2	6989	4.3222	zinc finger protein, putative
PF3D7_0818200	830006	831454	789	+	4	20096	25.4702	14-3-3 protein
PF3D7_0818400	835978	836848	597	-	2	2193	3.67337	rRNA-processing protein FCF1, putative
PF3D7_0818500	842317	843215	576	+	2	16289	28.2795	zinc finger protein, putative
PF3D7_0818700	848277	852947	3672	-	5	11404	3.10566	DNA helicase, putative
PF3D7_0818900	860384	862417	2034	+	1	72107	35.4508	heat shock protein 70
PF3D7_0819600	885198	886136	834	-	2	5483	6.57434	conserved Plasmodium protein, unknown function
PF3D7_0820300	919055	920896	1842	+	1	9825	5.33388	conserved Plasmodium protein, unknown function
PF3D7_0821000	948745	950899	1545	+	5	3380	2.1877	conserved Plasmodium protein, unknown function
PF3D7_0821400	965822	966657	375	+	2	5290	14.1067	conserved Plasmodium protein, unknown function
PF3D7_0821700	973586	974267	420	+	3	4459	10.6167	60S ribosomal protein L22, putative
PF3D7_0821800	976074	976644	243	+	3	2884	11.8683	protein transport protein SEC61 subunit beta, putative
PF3D7_0822600	997055	999529	2280	+	2	5528	2.42456	protein transport protein SEC23
PF3D7_0822900	1007777	1011307	3531	-	1	39481	11.1813	conserved Plasmodium protein, unknown function
PF3D7_0823200	1022629	1023846	861	-	3	3994	4.63879	RNA-binding protein, putative
PF3D7_0823300	1028752	1033514	4398	+	4	11305	2.57049	histone acetyltransferase GCN5
PF3D7_0823700	1041832	1042327	201	-	2	499	2.48259	mitochondrial import receptor subunit TOM7, putative
PF3D7_0823800	1043813	1045780	1968	+	1	6926	3.51931	DnaJ protein, putative
PF3D7_0824400	1062304	1064061	1758	-	1	4921	2.7992	nucleoside transporter 2
PF3D7_0824800	1075800	1079630	3831	+	1	9412	2.4568	conserved Plasmodium membrane protein, unknown function
PF3D7_0825300	1095116	1095562	447	-	1	966	2.16107	SAYSvFN domain-containing protein, putative
PF3D7_0826700	1160164	1161708	972	-	2	15131	15.5669	receptor for activated c kinase
PF3D7_0826900	1164655	1167205	2259	+	3	5249	2.32359	conserved Plasmodium protein, unknown function
PF3D7_0827800	1198858	1206057	7200	+	1	14580	2.025	SET domain protein, putative
PF3D7_0827900	1206788	1208394	1452	-	2	26792	18.4518	protein disulfide isomerase
PF3D7_0828800	1237285	1239501	2217	-	1	11003	4.96301	GPI-anchored micronemal antigen
PF3D7_0828900	1241966	1242895	558	-	4	3884	6.96057	conserved Plasmodium protein, unknown function
PF3D7_0829100	1252349	1253796	651	+	7	1674	2.57143	conserved protein, unknown function
PF3D7_0829300	1256555	1257133	288	+	4	678	2.35417	U6 snRNA-associated Sm-like protein LSm8, putative
PF3D7_0829800	1272718	1275456	2739	+	1	18933	6.91238	unspecified product
PF3D7_0829900	1275625	1278795	3171	+	1	76472	24.1161	unspecified product
PF3D7_0830200	1284578	1287755	3178	+	1	29897	9.40749	28S ribosomal RNA
PF3D7_0830400	1294022	1294722	414	+	2	7803	18.8478	CRA domain-containing protein, putative
PF3D7_0830500	1296134	1298328	2028	-	2	15406	7.59665	sporozoite and liver stage tryptophan-rich protein, putative
PF3D7_0830600	1303323	1304813	1371	+	2	3333	2.43107	Plasmodium exported protein (PHISTc), unknown function
PF3D7_0831500	1353456	1354669	1008	+	2	6874	6.81944	Plasmodium exported protein (PHIST), unknown function
PF3D7_0831600	1358314	1363618	4185	+	9	12231	2.92258	cytoadherence linked asexual protein 8
PF3D7_0831700	1365467	1367506	2040	-	1	21564	10.5706	heat shock protein 70
PF3D7_0831800	1374236	1375299	918	-	2	14677	15.988	histidine-rich protein II
PF3D7_0901700	82002	82998	684	-	2	1736	2.53801	Plasmodium exported protein (hyp5), unknown function
PF3D7_0902500	109334	111329	1776	-	3	4433	2.49606	serine/threonine protein kinase, FIKK family
PF3D7_0903200	133762	135587	621	-	7	5275	8.49436	ras-related protein RAB7
PF3D7_0903300	140977	150588	9612	+	1	42996	4.47316	conserved Plasmodium membrane protein, unknown function
PF3D7_0903400	151700	159541	7611	-	2	17328	2.2767	ATP-dependent RNA helicase DDX60, putative
PF3D7_0903600.1	168493	172887	2283	+	17	11776	5.15813	conserved Plasmodium protein, unknown function, unspecified product
PF3D7_0903600.2	168493	169715	549	+	5	1525	2.77778	conserved Plasmodium protein, unknown function, unspecified product
PF3D7_0903700	175542	177442	1362	+	3	8673	6.36784	alpha tubulin 1
PF3D7_0903900	185821	186383	396	+	2	6749	17.0429	60S ribosomal protein L32
PF3D7_0904000	187342	188622	1281	-	1	3716	2.90086	GTPase-activating protein, putative
PF3D7_0904400	208168	208725	558	-	1	2042	3.6595	signal peptidase complex subunit 3, putative
PF3D7_0904500	210077	210609	390	+	2	891	2.28462	prefoldin subunit 4, putative
PF3D7_0904600	212515	217983	5313	+	2	14914	2.80708	ubiquitin specific protease, putative
PF3D7_0904700	218675	219462	570	-	2	1838	3.22456	bacterial histone-like protein
PF3D7_0904900	224875	232831	7707	-	3	21029	2.72856	copper-transporting ATPase
PF3D7_0905400	270740	274789	2694	-	7	106648	39.5872	high molecular weight rhoptry protein 3
PF3D7_0905500	278369	279088	720	+	1	4938	6.85833	conserved Plasmodium protein, unknown function
PF3D7_0906100	305070	306626	588	+	7	1261	2.14456	vacuolar protein sorting-associated protein 46, putative
PF3D7_0906500	318311	319546	1236	+	1	2740	2.21683	arginase
PF3D7_0906600	320811	323342	2532	-	1	9320	3.68088	zinc finger protein, putative
PF3D7_0907000	337564	337920	243	+	2	1069	4.39918	conserved Plasmodium protein, unknown function
PF3D7_0907200	345892	349293	3402	+	1	8988	2.64198	GTPase-activating protein, putative
PF3D7_0907400	351955	354723	2769	-	1	13539	4.88949	ATP-dependent protease ATPase subunit ClpY
PF3D7_0907500	356536	357683	504	-	6	1215	2.41071	conserved Plasmodium protein, unknown function
PF3D7_0907700	364069	364908	840	-	1	3795	4.51786	proteasome activator 28 subunit beta, putative
PF3D7_0907800	366925	367500	576	+	1	3499	6.07465	ribosomal protein L35, apicoplast, putative
PF3D7_0907900	367865	368789	726	-	2	2303	3.17218	peptide deformylase
PF3D7_0908000	369870	371554	1251	-	3	2976	2.3789	plasma membrane protein 1, putative
PF3D7_0908400	388149	388736	588	+	1	2527	4.29762	conserved Plasmodium protein, unknown function
PF3D7_0909600	433238	435373	1815	-	3	5283	2.91074	conserved Plasmodium protein, unknown function
PF3D7_0909800	445788	446329	351	+	3	711	2.02564	small nuclear ribonucleoprotein Sm D3, putative
PF3D7_0910300	475671	476969	1299	+	1	4636	3.5689	conserved Plasmodium protein, unknown function
PF3D7_0910500	482461	487554	5094	-	1	10438	2.04908	DNA repair protein REV1, putative
PF3D7_0911000	500183	502733	879	+	13	7030	7.99772	phosphatidylinositol N-acetylglucosaminyltransferase, putative
PF3D7_0911100	504412	508130	3498	+	2	21216	6.06518	conserved Plasmodium protein, unknown function
PF3D7_0911800	535851	536681	831	-	1	3027	3.6426	conserved Plasmodium protein, unknown function
PF3D7_0911900	538221	539872	1242	-	2	8551	6.88486	falstatin
PF3D7_0912400	551426	553167	1341	-	2	4948	3.68978	alkaline phosphatase, putative
PF3D7_0912900	567283	568640	1017	+	2	3824	3.76008	26S proteasome regulatory subunit RPN8, putative
PF3D7_0913000	569124	570374	444	-	5	1098	2.47297	conserved protein, unknown function
PF3D7_0913200	575679	576509	831	+	1	6599	7.94103	elongation factor 1-beta
PF3D7_0913700	589263	591242	1980	+	1	4548	2.29697	conserved Plasmodium protein, unknown function
PF3D7_0913800	593107	593556	261	+	2	3409	13.0613	conserved Plasmodium protein, unknown function
PF3D7_0914100	601076	604576	3501	-	1	12277	3.50671	conserved Plasmodium protein, unknown function
PF3D7_0914200	608361	610075	1257	-	4	3479	2.7677	phospholipid or glycerol acyltransferase, putative
PF3D7_0914400	617963	619835	750	+	6	2842	3.78933	conserved Plasmodium protein, unknown function
PF3D7_0914600	627754	628319	336	+	2	1349	4.01488	transcription elongation factor 1, putative
PF3D7_0914700	630657	632207	1551	+	1	4118	2.65506	major facilitator superfamily-related transporter, putative
PF3D7_0914800	633574	634200	627	-	1	1340	2.13716	GINS complex subunit Psf3, putative
PF3D7_0915000	639658	641259	1602	-	1	3305	2.06305	type II NADH:ubiquinone oxidoreductase
PF3D7_0915100	643232	644043	480	-	4	1158	2.4125	SUMO-conjugating enzyme UBC9
PF3D7_0915400	650585	654841	4257	-	1	10364	2.43458	ATP-dependent 6-phosphofructokinase
PF3D7_0915900	665978	666478	501	+	1	1317	2.62874	conserved Plasmodium protein, unknown function
PF3D7_0916000	667255	671725	4140	-	4	16353	3.95	major facilitator superfamily domain-containing protein, putative
PF3D7_0916700	696863	698029	1167	-	1	7372	6.31705	RNA-binding protein musashi, putative
PF3D7_0916800	703368	703517	150	+	1	791	5.27333	conserved Plasmodium protein, unknown function
PF3D7_0916900	705357	706355	999	+	1	5511	5.51652	zinc finger protein, putative
PF3D7_0917900	737985	740276	1959	+	2	53855	27.4911	heat shock protein 70
PF3D7_0918000	742494	743684	1191	-	1	41549	34.8858	glideosome-associated protein 50
PF3D7_0918100	747173	748490	393	+	6	2052	5.22137	cytochrome b5-like heme/steroid binding protein, putative
PF3D7_0918200	748678	750262	954	-	5	4816	5.04822	50S ribosomal protein L3, apicoplast, putative
PF3D7_0918300	751358	752422	963	-	2	2250	2.33645	eukaryotic translation initiation factor 3 subunit F, putative
PF3D7_0918500	761211	763358	2148	+	1	16506	7.68436	telomerase RNA
PF3D7_0918700	769452	772105	2214	+	4	7314	3.30352	conserved Plasmodium protein, unknown function
PF3D7_0919000	781368	782675	810	-	3	6443	7.95432	nucleosome assembly protein
PF3D7_0919100	786156	788212	1113	+	5	7830	7.03504	DnaJ protein, putative
PF3D7_0919200	789514	790478	753	-	2	3478	4.61886	PPPDE peptidase, putative
PF3D7_0919400	795539	797470	1548	+	3	3527	2.27842	protein disulfide isomerase
PF3D7_0919800	804417	807920	3237	-	2	7709	2.38153	TLD domain-containing protein
PF3D7_0919900	809659	819804	10146	-	1	50667	4.99379	regulator of chromosome condensation, putative
PF3D7_0920500	841536	842655	576	+	5	6116	10.6181	ADP-ribosylation factor, putative
PF3D7_0920700	849515	851296	1782	+	1	10117	5.67733	CRAL/TRIO domain-containing protein, putative
PF3D7_0920900	855516	857286	1443	+	2	3809	2.63964	U4/U6 snRNA-associated-splicing factor, putative
PF3D7_0921000.2	857587	858829	447	-	5	898	2.00895	ubiquitin-conjugating enzyme E2, putative
PF3D7_0921700	883515	885592	1710	-	3	4377	2.55965	conserved Plasmodium protein, unknown function
PF3D7_0921900	888559	889305	747	+	1	2152	2.88086	conserved Plasmodium protein, unknown function
PF3D7_0922100	895415	900304	4629	+	3	14048	3.03478	ubiquitin-like protein, putative
PF3D7_0922200	903362	904570	1209	+	1	40446	33.4541	S-adenosylmethionine synthetase
PF3D7_0922500	913230	914480	1251	+	1	3975	3.17746	phosphoglycerate kinase
PF3D7_0922600	916603	918674	1632	+	3	3601	2.2065	glutamine synthetase, putative
PF3D7_0923900	966795	968069	609	-	6	4144	6.8046	RNA-binding protein, putative
PF3D7_0924000	972548	976637	3879	+	2	19981	5.15107	patatin-like phospholipase, putative
PF3D7_0924400	988977	992915	3738	+	2	21254	5.68593	conserved Plasmodium protein, unknown function
PF3D7_0925900	1040713	1041516	654	+	2	13306	20.3456	conserved Plasmodium protein, unknown function
PF3D7_0926200	1063053	1063208	156	+	1	1052	6.74359	conserved Plasmodium protein, unknown function
PF3D7_0926400	1070965	1072955	1590	-	2	4077	2.56415	monocarboxylate transporter, putative
PF3D7_0927000	1099075	1099750	471	+	2	1052	2.23355	CS domain protein, putative
PF3D7_0927500	1120100	1121331	339	-	5	2161	6.37463	dynein light chain, putative
PF3D7_0927600	1123861	1125858	1788	+	2	11176	6.25056	RNA-binding protein, putative
PF3D7_0927800	1128871	1129940	822	+	2	2212	2.691	cytochrome c oxidase subunit 5B, putative
PF3D7_0927900	1131074	1132135	1062	-	1	6023	5.67137	phosphatidylserine decarboxylase
PF3D7_0928000.1	1135545	1136391	312	+	4	2514	8.05769	cytochrome c oxidase subunit 6B, putative
PF3D7_0928000.2	1135545	1136391	252	+	4	2044	8.11111	cytochrome c oxidase subunit 6B, putative
PF3D7_0928600	1148161	1148502	342	-	1	864	2.52632	conserved Plasmodium protein, unknown function
PF3D7_0929200	1167842	1169577	870	+	6	4163	4.78506	RNA-binding protein, putative
PF3D7_0929400	1175203	1180762	4137	+	10	44092	10.658	high molecular weight rhoptry protein 2
PF3D7_0929500	1180983	1181996	630	-	3	9446	14.9937	conserved protein, unknown function
PF3D7_0930100	1191787	1195239	3453	-	1	8217	2.37967	conserved Plasmodium protein, unknown function
PF3D7_0930200	1195693	1198462	1920	-	5	15524	8.08542	leucine-rich repeat protein
PF3D7_0930300	1201812	1206974	5163	+	1	510622	98.9003	merozoite surface protein 1
PF3D7_0930400.1	1207974	1211703	2748	+	8	13834	5.03421	zinc finger protein, putative
PF3D7_0930400.2	1207974	1211703	2748	+	8	13824	5.03057	zinc finger protein, putative
PF3D7_0930500	1212169	1216500	4083	-	2	20683	5.06564	diacylglycerol kinase, putative
PF3D7_0931100	1254815	1257292	2478	+	1	13535	5.46207	nucleolar protein Nop52, putative
PF3D7_0931400	1263347	1264830	933	+	4	2812	3.01393	PUB domain-containing protein, putative
PF3D7_0931500	1264999	1266015	660	-	3	4511	6.83485	conserved Plasmodium protein, unknown function
PF3D7_0931800	1273082	1273930	849	-	1	4715	5.55359	proteasome subunit beta type-6, putative
PF3D7_0932000	1278007	1278896	309	+	5	3942	12.7573	conserved Plasmodium protein, unknown function
PF3D7_0932100	1279219	1283879	3825	-	5	23874	6.24157	protein MAM3, putative
PF3D7_0932200	1287008	1288372	516	+	4	13251	25.6802	profilin
PF3D7_0933000	1311440	1313725	2286	+	1	4766	2.08486	CSTF domain-containing protein, putative
PF3D7_0933600	1331349	1332803	1455	-	1	3737	2.56838	mitochondrial-processing peptidase subunit beta, putative
PF3D7_0934200	1346858	1347295	438	-	1	898	2.05023	conserved Plasmodium protein, unknown function
PF3D7_0934400	1349790	1350392	603	+	1	1364	2.26202	AP2 domain transcription factor, putative
PF3D7_0934500	1350836	1351929	708	-	2	3065	4.3291	V-type proton ATPase subunit E, putative
PF3D7_0934600	1354581	1355495	567	+	3	2362	4.16578	conserved Plasmodium protein, unknown function
PF3D7_0934700	1357411	1359262	1596	+	3	9247	5.79386	UBX domain, putative
PF3D7_0934800	1361935	1363848	1029	+	5	12830	12.4684	cAMP-dependent protein kinase catalytic subunit
PF3D7_0935000	1366569	1367150	582	-	1	2653	4.55842	U2 small nuclear ribonucleoprotein B'', putative
PF3D7_0935100	1367396	1367614	219	-	1	1103	5.03653	protein kish, putative
PF3D7_0935200	1368594	1372037	3444	-	1	7032	2.04181	vacuolar protein sorting-associated protein 33, putative
PF3D7_0935500	1400800	1402052	939	+	3	1948	2.07455	Plasmodium exported protein, unknown function
PF3D7_0935600	1405192	1407022	1539	+	2	11426	7.4243	gametocytogenesis-implicated protein
PF3D7_0935800	1413840	1419754	4023	+	9	19679	4.89162	cytoadherence linked asexual protein 9
PF3D7_0935900	1420483	1422807	2142	-	2	33277	15.5355	ring-exported protein 1
PF3D7_0936000	1427642	1428022	285	-	2	2717	9.53333	ring-exported protein 2
PF3D7_0936100	1430607	1431146	540	-	1	2030	3.75926	early transcribed membrane protein
PF3D7_0936300	1436687	1437981	981	-	2	6926	7.06014	ring-exported protein 3
PF3D7_0936600	1446929	1447947	894	+	2	1918	2.14541	gametocyte exported protein 5
PF3D7_0936800	1458392	1459862	1152	+	2	6468	5.61458	Plasmodium exported protein (PHISTc), unknown function
PF3D7_1001200	70547	70819	273	-	1	2620	9.59707	acyl-CoA binding protein, isoform 2, ACBP2
PF3D7_1001500	81416	81739	324	-	1	6365	19.6451	early transcribed membrane protein 10.1
PF3D7_1001600	86538	89009	2292	-	2	18167	7.92627	exported lipase 2
PF3D7_1001700	92573	93526	801	-	2	9813	12.2509	Plasmodium exported protein (PHISTc), unknown function
PF3D7_1001800	96113	97031	783	-	2	2353	3.00511	Plasmodium exported protein (PHISTc), unknown function
PF3D7_1001900	99379	100361	831	-	2	1861	2.23947	Plasmodium exported protein (hyp16), unknown function
PF3D7_1002100	106653	108662	1896	-	2	17871	9.42563	EMP1-trafficking protein
PF3D7_1002200	112929	116015	2940	+	2	7324	2.49116	tryptophan-rich antigen 3
PF3D7_1002400.1	121115	123291	747	+	7	3163	4.23427	transformer-2 protein homolog beta, putative
PF3D7_1002400.2	121115	123291	741	+	7	3151	4.25236	transformer-2 protein homolog beta, putative
PF3D7_1002500	123770	124882	564	-	3	1947	3.45213	conserved Plasmodium protein, unknown function
PF3D7_1002900	138765	139853	384	+	5	1690	4.40104	conserved Plasmodium protein, unknown function
PF3D7_1003000	142419	146237	3819	+	1	13282	3.47787	conserved Plasmodium protein, unknown function
PF3D7_1003300	150416	150874	459	-	1	2719	5.92375	N-terminal acetyltransferase A complex catalytic subunit ARD1, putative
PF3D7_1003400	152364	158516	6153	-	1	12818	2.08321	conserved Plasmodium protein, unknown function
PF3D7_1003500	160316	160962	357	-	2	5557	15.5658	40S ribosomal protein S20e, putative
PF3D7_1003600	164945	165790	846	+	1	17915	21.1761	inner membrane complex protein 1c, putative
PF3D7_1004000	179344	180226	609	-	2	6510	10.6897	60S ribosomal protein L13, putative
PF3D7_1004300	199452	202844	3393	-	1	7934	2.33834	E3 ubiquitin-protein ligase, putative
PF3D7_1004600	215717	219759	3240	+	6	7920	2.44444	conserved Plasmodium membrane protein, unknown function
PF3D7_1004700	220018	221353	804	-	4	2181	2.71269	conserved Plasmodium protein, unknown function
PF3D7_1004900	224248	225207	960	+	1	1920	2	conserved Plasmodium protein, unknown function
PF3D7_1005800	251579	252490	681	+	2	2784	4.08811	conserved Plasmodium membrane protein, unknown function
PF3D7_1006200	262150	262997	324	-	3	8601	26.5463	DNA/RNA-binding protein Alba 3
PF3D7_1006600	272243	272824	582	-	1	1631	2.80241	phosducin-like protein, putative
PF3D7_1006800	277621	279168	741	+	4	4085	5.51282	single-strand telomeric DNA-binding protein GBP2, putative
PF3D7_1007100	286522	287473	351	-	4	979	2.78917	conserved Plasmodium protein, unknown function
PF3D7_1007200	288383	290826	1782	-	5	5315	2.9826	rho GTPase-activating protein, putative
PF3D7_1007300	293850	295999	1941	+	2	4279	2.20453	RING zinc finger protein, putative
PF3D7_1007400	296906	297565	660	+	1	3159	4.78636	conserved Plasmodium protein, unknown function
PF3D7_1007500	298361	298687	327	+	1	1517	4.63914	conserved Plasmodium protein, unknown function
PF3D7_1007600	299280	299609	330	+	1	834	2.52727	conserved Plasmodium protein, unknown function
PF3D7_1008000	321011	328150	7140	+	1	29543	4.13768	histone deacetylase 2
PF3D7_1008100	331246	342807	11562	+	1	39990	3.45874	zinc finger protein, putative
PF3D7_1008400	347206	348667	1347	-	2	10363	7.69339	26S protease regulatory subunit 4, putative
PF3D7_1008500	351703	355593	3891	+	1	9814	2.52223	conserved Plasmodium membrane protein, unknown function
PF3D7_1008700	360625	362480	1338	-	3	10071	7.52691	tubulin beta chain
PF3D7_1008800	365737	367146	1410	-	1	3528	2.50213	nucleolar protein 5, putative
PF3D7_1008900	369199	370225	729	-	2	2659	3.64746	adenylate kinase
PF3D7_1009700	389504	391165	1662	-	1	5099	3.06799	tubulin--tyrosine ligase, putative
PF3D7_1010300	414732	415328	357	+	3	14000	39.2157	succinate dehydrogenase subunit 4, putative
PF3D7_1010400	415404	417471	1095	-	6	7535	6.88128	conserved Plasmodium protein, unknown function
PF3D7_1010600	420185	421056	669	-	2	4234	6.32885	eukaryotic translation initiation factor 2 subunit beta
PF3D7_1010700	422961	424365	672	+	7	2379	3.54018	dolichyl-phosphate-mannose--protein mannosyltransferase, putative
PF3D7_1011400	441140	441955	816	-	1	3636	4.45588	proteasome subunit beta type-5
PF3D7_1011500	443874	444401	528	-	1	2802	5.30682	conserved Plasmodium membrane protein, unknown function
PF3D7_1011800	455398	458817	3420	+	1	46562	13.6146	PRE-binding protein
PF3D7_1011900	460335	461993	918	-	6	2589	2.82026	heme oxygenase
PF3D7_1012200	470979	471933	804	+	2	10936	13.602	rhoptry associated adhesin
PF3D7_1012300	472546	473386	579	-	2	1915	3.30743	cytochrome b-c1 complex subunit 7, putative
PF3D7_1012400	475327	476563	696	-	3	15039	21.6078	hypoxanthine-guanine phosphoribosyltransferase
PF3D7_1012900	496331	497573	1143	-	2	7477	6.54156	autophagy-related protein 18, putative
PF3D7_1013200	511084	514278	3195	+	1	8354	2.61471	conserved Plasmodium protein, unknown function
PF3D7_1013800	542359	544779	1461	+	5	7696	5.26762	conserved Plasmodium protein, unknown function
PF3D7_1014100	555160	559527	4368	+	1	23024	5.27106	merozoite surface protein MSA180, putative
PF3D7_1014600	581354	589090	7737	-	1	29190	3.77278	transcriptional coactivator ADA2
PF3D7_1014900	600970	607809	6840	-	1	27502	4.02076	conserved Plasmodium protein, unknown function
PF3D7_1015800	633682	635286	1008	+	5	2551	2.53075	ribonucleoside-diphosphate reductase small chain, putative
PF3D7_1015900	637138	639011	1341	+	2	10996	8.19985	enolase
PF3D7_1016000	641390	642751	1362	+	1	3207	2.35463	conserved Plasmodium protein, unknown function
PF3D7_1016300	650898	653567	2475	-	2	72312	29.217	GBP130 protein
PF3D7_1016400	656709	659027	1830	-	3	4024	2.19891	serine/threonine protein kinase, FIKK family
PF3D7_1016800	675293	676417	945	-	2	9070	9.59788	Plasmodium exported protein (PHISTc), unknown function
PF3D7_1016900	682182	682508	327	-	1	8340	25.5046	early transcribed membrane protein 10.3
PF3D7_1017100	689888	690820	933	-	1	5895	6.31833	rhoptry neck protein 12
PF3D7_1017400	697970	699823	735	-	8	4352	5.92109	phosphomannomutase, putative
PF3D7_1017500	701746	702422	405	+	3	6905	17.0494	essential light chain ELC
PF3D7_1017600	705537	708452	2916	+	1	8118	2.78395	conserved Plasmodium protein, unknown function
PF3D7_1017900	715878	717437	1404	+	2	4911	3.49786	26S proteasome regulatory subunit p55, putative
PF3D7_1018500	735921	736813	336	-	5	983	2.9256	pre-mRNA-splicing factor RDS3, putative
PF3D7_1018700	747028	748887	1860	+	1	10088	5.42366	conserved Plasmodium protein, unknown function
PF3D7_1019000	757795	765158	7218	+	2	32672	4.52646	eukaryotic translation initiation factor subunit eIF2A, putative
PF3D7_1019100	766168	771954	5787	-	1	13370	2.31035	conserved Plasmodium protein, unknown function
PF3D7_1019400	786503	787008	327	+	2	2814	8.6055	60S ribosomal protein L30e, putative
PF3D7_1019800	804328	807582	3255	-	1	9286	2.85284	tRNA methyltransferase, putative
PF3D7_1019900	808618	808992	375	-	1	3290	8.77333	autophagy-related protein 8
PF3D7_1020000	811106	813484	969	-	10	3605	3.72033	RNA-binding protein 34, putative
PF3D7_1020100	814352	814957	306	-	3	624	2.03922	flagellar outer arm dynein-associated protein, putative
PF3D7_1020900	845086	846192	546	-	5	9742	17.8425	ADP-ribosylation factor
PF3D7_1021700	873208	894869	20805	-	5	99990	4.80606	conserved Plasmodium membrane protein, unknown function
PF3D7_1021800	896865	903608	6225	-	4	36625	5.88353	schizont egress antigen-1
PF3D7_1021900	905473	912345	6873	-	1	39944	5.81173	PHAX domain-containing protein, putative
PF3D7_1022400	939938	942234	1617	-	4	5414	3.34818	serine/arginine-rich splicing factor 4
PF3D7_1022500	944398	946089	1692	-	1	4684	2.76832	citrate synthase, mitochondrial, putative
PF3D7_1022700	951752	952579	828	-	1	5990	7.2343	phospholipid scramblase, putative
PF3D7_1022900	958939	959896	357	-	4	854	2.39216	CDGSH iron-sulfur domain-containing protein, putative
PF3D7_1023000	961066	962307	1242	-	1	7000	5.63607	conserved Plasmodium membrane protein, unknown function
PF3D7_1023300	984228	985330	240	-	4	560	2.33333	conserved Plasmodium protein, unknown function
PF3D7_1023400	985350	986988	588	+	7	1264	2.14966	HORMA domain protein, putative
PF3D7_1023500	987017	987310	294	-	1	1101	3.7449	conserved Plasmodium protein, unknown function
PF3D7_1023900	997475	1007461	9987	-	1	72983	7.3078	chromodomain-helicase-DNA-binding protein 1 homolog, putative
PF3D7_1024000	1014896	1016596	1701	+	1	5169	3.0388	conserved Plasmodium protein, unknown function
PF3D7_1024300	1022505	1022897	393	+	1	1012	2.57506	conserved Plasmodium protein, unknown function
PF3D7_1024800	1034685	1039079	4395	+	1	29172	6.63754	exported protein 3
PF3D7_1025000	1045608	1049760	2943	-	7	11691	3.97248	EF-hand calcium-binding domain-containing protein, putative
PF3D7_1025800	1089997	1090538	204	-	3	438	2.14706	conserved Plasmodium protein, unknown function
PF3D7_1025900	1091436	1097277	3996	-	15	12923	3.23398	conserved Plasmodium protein, unknown function
PF3D7_1026000	1098455	1099882	1092	-	3	4443	4.06868	conserved Plasmodium protein, unknown function
PF3D7_1026500	1112423	1112635	213	-	1	632	2.96714	conserved Plasmodium protein, unknown function
PF3D7_1026600	1113495	1118573	5079	-	1	98267	19.3477	conserved Plasmodium protein, unknown function
PF3D7_1026800	1122962	1124037	792	+	2	9610	12.1338	40S ribosomal protein S2
PF3D7_1027300	1140589	1142602	1182	-	3	31829	26.9281	peroxiredoxin
PF3D7_1027700.1	1150663	1151853	540	-	5	1356	2.51111	centrin-3
PF3D7_1027700.2	1150663	1151853	540	-	5	1355	2.50926	centrin-3
PF3D7_1027800	1153271	1154431	1161	-	1	12796	11.0215	60S ribosomal protein L3
PF3D7_1028200	1166046	1166870	825	-	1	1735	2.10303	RING zinc finger protein, putative
PF3D7_1028300	1168010	1168957	948	-	1	2364	2.49367	rRNA-processing protein EBP2, putative
PF3D7_1028600	1176461	1177849	516	-	4	1381	2.67636	conserved Plasmodium protein, unknown function
PF3D7_1028700	1181005	1182501	1497	+	1	16750	11.189	merozoite TRAP-like protein
PF3D7_1028800	1183487	1183995	354	-	2	1899	5.36441	conserved Plasmodium protein, unknown function
PF3D7_1029400	1200894	1202399	1506	-	1	3412	2.2656	LEM3/CDC50 family protein, putative
PF3D7_1029600	1206302	1207405	1104	+	1	5536	5.01449	adenosine deaminase
PF3D7_1029900	1217348	1222441	5094	+	1	20092	3.94425	conserved Plasmodium protein, unknown function
PF3D7_1030000	1223375	1224167	402	+	4	1461	3.63433	transcription elongation factor SPT4, putative
PF3D7_1030200	1230561	1231913	1353	-	1	7071	5.22616	claudin-like apicomplexan microneme protein, putative
PF3D7_1030300	1233667	1237002	3336	-	1	12590	3.77398	conserved Plasmodium protein, unknown function
PF3D7_1030500	1244215	1245396	1182	+	1	3608	3.05245	26S proteasome regulatory subunit RPN9, putative
PF3D7_1030800	1250045	1250683	639	+	1	3192	4.99531	calmodulin, putative
PF3D7_1031300	1260310	1263069	2760	+	1	5753	2.08442	conserved Plasmodium protein, unknown function
PF3D7_1031600	1275863	1278577	2715	+	1	6166	2.27109	conserved Plasmodium protein, unknown function
PF3D7_1031700	1281252	1281989	351	+	4	1492	4.25071	protein phosphatase inhibitor 3
PF3D7_1032100	1293499	1297071	3573	+	1	8228	2.30283	mRNA-decapping enzyme subunit 1, putative
PF3D7_1032500	1306241	1307532	792	-	3	1585	2.00126	DER1-like protein, putative
PF3D7_1033100	1324132	1328436	4305	-	1	41133	9.5547	S-adenosylmethionine decarboxylase/ornithine decarboxylase
PF3D7_1033200	1335222	1336289	1068	+	1	4973	4.65637	early transcribed membrane protein 10.2
PF3D7_1033400	1339762	1340628	867	+	1	3188	3.67705	haloacid dehalogenase-like hydrolase
PF3D7_1033600	1344150	1346897	2748	-	1	6032	2.19505	pre-mRNA-splicing factor CEF1, putative
PF3D7_1033900	1354454	1355571	576	-	5	3959	6.87326	ubiquitin-conjugating enzyme E2, putative
PF3D7_1034600	1376827	1377759	933	-	1	3382	3.62487	translation initiation factor IF-3, putative
PF3D7_1034700	1378759	1379295	537	+	1	1215	2.26257	ADP-ribosylation factor, putative
PF3D7_1035100	1391445	1393130	1686	+	1	4384	2.60024	probable protein, unknown function
PF3D7_1035200	1394839	1396596	1758	+	1	66661	37.9187	S-antigen
PF3D7_1035300	1399195	1402896	3702	+	1	25777	6.96299	glutamate-rich protein GLURP
PF3D7_1035400	1404195	1405259	1065	+	1	42569	39.9709	merozoite surface protein 3
PF3D7_1035500	1407276	1408391	1116	+	1	26397	23.6532	merozoite surface protein 6
PF3D7_1035600	1409281	1410555	1275	+	1	2732	2.14275	merozoite surface protein
PF3D7_1035700	1413200	1415293	2094	+	1	17556	8.38395	duffy binding-like merozoite surface protein
PF3D7_1035900	1423983	1425683	1701	+	1	21128	12.4209	probable protein, unknown function
PF3D7_1036000	1427127	1428344	1218	+	1	5144	4.22332	merozoite surface protein
PF3D7_1036500	1441901	1443568	1668	+	1	6918	4.14748	probable protein, unknown function
PF3D7_1036900	1452599	1458006	5046	-	3	39572	7.84225	conserved Plasmodium protein, unknown function
PF3D7_1037300	1477940	1478845	906	-	1	5346	5.90066	ADP/ATP transporter on adenylate translocase
PF3D7_1037700	1495973	1496658	318	+	3	726	2.28302	enhancer of rudimentary homolog, putative
PF3D7_1037900	1502955	1504322	549	-	4	1718	3.12933	conserved Plasmodium protein, unknown function
PF3D7_1038000.1	1505835	1506896	360	+	4	21083	58.5639	antigen UB05
PF3D7_1038000.2	1505835	1506896	363	+	4	21087	58.0909	antigen UB05
PF3D7_1102700	128789	129064	276	+	1	21786	78.9348	early transcribed membrane protein 11.1
PF3D7_1102800	131703	131987	285	-	1	94592	331.902	early transcribed membrane protein 11.2
PF3D7_1103100	140048	140801	357	-	2	8979	25.1513	60S acidic ribosomal protein P1, putative
PF3D7_1103900	175248	175433	186	+	1	453	2.43548	conserved Plasmodium protein, unknown function
PF3D7_1104100	179461	181128	1044	-	4	3874	3.71073	syntaxin, Qa-SNARE family
PF3D7_1104200	182383	187223	4281	-	5	10367	2.42163	chromatin remodeling protein
PF3D7_1104400	196767	198355	1275	+	2	9759	7.65412	thioredoxin, putative
PF3D7_1104900	214825	219687	4863	+	1	16453	3.3833	calcium/calmodulin-dependent protein kinase, putative
PF3D7_1105000	221818	222129	312	-	1	151741	486.349	histone H4
PF3D7_1105100	226065	226418	354	+	1	296037	836.263	histone H2B
PF3D7_1105400	235597	237097	786	-	2	9269	11.7926	40S ribosomal protein S4, putative
PF3D7_1105500	239687	240613	516	+	3	1234	2.39147	centrin-4
PF3D7_1105600	241184	243517	2334	-	1	9899	4.24122	translocon component PTEX88
PF3D7_1105800	250918	252872	801	+	9	3489	4.35581	conserved Apicomplexan protein, unknown function
PF3D7_1106100	258779	259981	810	+	4	1711	2.11235	apicoplast ribosomal protein S15 precursor, putative
PF3D7_1107300	301283	311287	10005	-	1	58822	5.87926	polyadenylate-binding protein-interacting protein 1, putative
PF3D7_1107800	329867	335601	5487	-	2	17780	3.24039	AP2 domain transcription factor, putative
PF3D7_1108000	352556	354262	1707	+	1	6333	3.71002	IWS1-like protein, putative
PF3D7_1108100	356083	360434	4107	+	3	12618	3.07232	conserved Plasmodium protein, unknown function
PF3D7_1108300	362421	362887	324	+	2	968	2.98765	pterin-4a-carbinolamine dehydratase
PF3D7_1108400	365093	366100	1008	+	1	6414	6.3631	casein kinase 2, alpha subunit
PF3D7_1108600	369675	370706	1032	-	1	26498	25.6764	endoplasmic reticulum-resident calcium binding protein
PF3D7_1108700	373238	374860	1623	-	1	10225	6.30006	heat shock protein J2
PF3D7_1109400	390644	393331	1311	-	6	6191	4.72235	essential nuclear protein 1, putative
PF3D7_1109500	391061	391145	85	-	1	858	10.0941	small nucleolar RNA snoR09
PF3D7_1109900	397124	397775	339	+	2	7255	21.4012	60S ribosomal protein L36
PF3D7_1110000	398659	399226	249	+	2	499	2.00402	conserved Plasmodium protein, unknown function
PF3D7_1110200	405495	409717	3990	+	2	8244	2.06617	pre-mRNA-processing factor 6, putative
PF3D7_1110400	414797	419556	4452	+	3	28348	6.36748	RNA-binding protein, putative
PF3D7_1110600	425904	426864	537	-	5	1768	3.29236	mitochondrial ribosomal protein L11 precursor, putative
PF3D7_1110700	428362	430047	1137	+	4	2453	2.15743	actin-like protein, putative
PF3D7_1111100	437171	438220	1050	-	1	3131	2.9819	replication factor C subunit 5, putative
PF3D7_1111400	445233	445799	567	-	1	1265	2.23104	conserved Plasmodium protein, unknown function
PF3D7_1112000	459776	460620	219	+	4	871	3.97717	conserved Plasmodium protein, unknown function
PF3D7_1112100	462290	469672	7383	+	1	31948	4.32724	conserved Plasmodium protein, unknown function
PF3D7_1113100	511105	511761	657	-	1	11044	16.8097	protein tyrosine phosphatase
PF3D7_1113200	517311	517985	390	+	2	1173	3.00769	conserved Plasmodium protein, unknown function
PF3D7_1113300	519189	520220	1032	+	1	5184	5.02326	UDP-galactose transporter, putative
PF3D7_1113400	521122	522824	1167	-	4	5884	5.04199	ubiquitin domain-containing protein DSK2, putative
PF3D7_1113800	531177	533285	2109	-	1	5968	2.82978	conserved Plasmodium membrane protein, unknown function
PF3D7_1114100.1	539903	541387	837	+	4	3325	3.97252	rhomboid protease ROM1
PF3D7_1114100.2	539903	541387	831	+	4	3308	3.98075	rhomboid protease ROM1
PF3D7_1114200	542330	544765	1122	-	11	3462	3.08556	GTPase-activating protein, putative
PF3D7_1114700	555514	558668	2100	+	9	7411	3.52905	serine/threonine protein kinase, putative
PF3D7_1115000	570017	570714	438	+	3	1017	2.32192	conserved Plasmodium protein, unknown function
PF3D7_1115200	576773	580276	2382	+	7	7755	3.25567	histone-lysine N-methyltransferase SET7
PF3D7_1115300	581250	582698	1449	-	1	4410	3.04348	cysteine proteinase falcipain 2b
PF3D7_1115400	584328	585806	1479	-	1	7672	5.18729	cysteine proteinase falcipain 3
PF3D7_1115500	588169	589400	696	+	4	1971	2.8319	AP2 domain transcription factor, putative
PF3D7_1115600	589707	590629	588	-	3	7342	12.4864	peptidyl-prolyl cis-trans isomerase
PF3D7_1115700	592130	593584	1455	-	1	7881	5.41649	cysteine proteinase falcipain 2a
PF3D7_1115800	596289	597203	915	-	1	11497	12.565	conserved Plasmodium protein, unknown function
PF3D7_1115900	600176	602215	882	+	10	2120	2.40363	palmitoyltransferase DHHC9
PF3D7_1116000	602983	606918	3606	-	3	24338	6.74931	rhoptry neck protein 4
PF3D7_1116100	607902	613394	5493	-	1	38814	7.06608	serine esterase, putative
PF3D7_1116200.1	615744	617186	660	-	7	1834	2.77879	pyridoxine biosynthesis protein PDX2
PF3D7_1116200.2	615744	617186	546	-	6	1596	2.92308	pyridoxine biosynthesis protein PDX2
PF3D7_1116300	618312	619778	504	+	6	1706	3.38492	peptidyl-prolyl cis-trans isomerase
PF3D7_1116400	619893	621350	1458	-	1	4789	3.28464	guanine nucleotide-exchange factor SEC12
PF3D7_1116500	624370	625737	1368	+	1	3463	2.53143	folate transporter 2
PF3D7_1116700	630779	632881	2103	-	1	18400	8.74941	dipeptidyl aminopeptidase 1
PF3D7_1116800	636094	639511	2721	-	4	50193	18.4465	heat shock protein 101
PF3D7_1117300	662000	662386	387	+	1	2715	7.0155	conserved Plasmodium protein, unknown function
PF3D7_1117400	664163	665356	1194	+	1	3975	3.32915	conserved Plasmodium protein, unknown function
PF3D7_1117700	670711	671515	645	-	2	16041	24.8698	GTP-binding nuclear protein RAN/TC4
PF3D7_1118100	687235	687781	468	+	2	979	2.09188	AP-1 complex subunit sigma, putative
PF3D7_1118400	699869	700789	921	-	1	2393	2.59826	haloacid dehalogenase-like hydrolase, putative
PF3D7_1118700	708526	712863	1959	-	18	4610	2.35324	myosin light chain B
PF3D7_1119000	718650	719765	1116	-	1	2763	2.47581	acyl-CoA-binding protein, putative
PF3D7_1119300	724855	725739	885	-	1	2169	2.45085	splicing factor U2AF small subunit, putative
PF3D7_1119800	746854	747456	603	-	1	1268	2.10282	alternative splicing factor ASF-1, putative
PF3D7_1120000	756192	760435	3213	+	6	11409	3.55089	conserved Plasmodium protein, unknown function
PF3D7_1120100	761695	762818	753	+	3	5557	7.37981	phosphoglycerate mutase, putative
PF3D7_1120200	765033	765625	252	+	2	1335	5.29762	conserved Plasmodium protein, unknown function
PF3D7_1121100	794254	799561	4635	-	4	14625	3.15534	conserved Plasmodium protein, unknown function
PF3D7_1121600	815386	816322	489	-	3	58061	118.734	exported protein 1
PF3D7_1121700	820073	822520	2448	+	1	7267	2.96855	protein GCN20
PF3D7_1122300	846929	848014	1086	+	1	3704	3.41068	conserved Plasmodium protein, unknown function
PF3D7_1122700	868388	869152	765	-	1	3203	4.18693	conserved Plasmodium protein, unknown function
PF3D7_1123000	895967	903370	7404	-	1	35107	4.74163	conserved Plasmodium protein, unknown function
PF3D7_1123100	909366	916324	6798	+	2	19620	2.88614	calcium-dependent protein kinase 7
PF3D7_1123300	921823	923892	2070	+	1	4517	2.18213	RING zinc finger protein, putative
PF3D7_1123900	945470	946148	438	+	3	1824	4.16438	13 kDa ribonucleoprotein-associated protein, putative
PF3D7_1124000	948591	950707	1398	+	5	3781	2.70458	endoplasmic reticulum oxidoreductin, putative
PF3D7_1124100	951382	956343	4962	-	1	10270	2.06973	beige/BEACH domain protein, putative
PF3D7_1124400	964675	965360	444	-	3	1095	2.46622	U6 snRNA-associated Sm-like protein LSm1, putative
PF3D7_1124600	970105	971376	1272	-	1	11026	8.66824	ethanolamine kinase
PF3D7_1124700	974493	975538	906	-	2	2073	2.28808	GrpE protein homolog, mitochondrial, putative
PF3D7_1124800	976880	977936	741	-	3	3991	5.38596	ribosome biogenesis regulatory protein, putative
PF3D7_1124900	981945	983086	375	+	4	3925	10.4667	60S ribosomal protein L35, putative
PF3D7_1125500	1001182	1001562	381	-	1	1108	2.90814	small nuclear ribonucleoprotein Sm D1, putative
PF3D7_1125600	1003226	1003694	252	-	2	688	2.73016	conserved Plasmodium protein, unknown function
PF3D7_1125700	1004780	1007354	2010	-	6	9160	4.55721	kelch domain-containing protein, putative
PF3D7_1125800	1008409	1010853	1779	-	4	8216	4.61832	kelch domain-containing protein, putative
PF3D7_1125900	1013466	1013747	282	+	1	1108	3.92908	conserved Plasmodium protein, unknown function
PF3D7_1126200	1023790	1024496	471	-	2	6798	14.4331	40S ribosomal protein S18, putative
PF3D7_1126300	1026976	1029544	1854	+	5	4562	2.46063	DnaJ protein, putative
PF3D7_1126700	1040790	1046087	2781	-	19	16503	5.9342	autophagy-related protein 23, putative
PF3D7_1127100	1060262	1060783	522	-	1	2210	4.23372	deoxyuridine 5'-triphosphate nucleotidohydrolase
PF3D7_1127500	1067197	1070219	1275	+	15	3266	2.56157	protein disulfide-isomerase, putative
PF3D7_1127600	1071752	1073813	894	+	10	3194	3.57271	CRAL/TRIO domain-containing protein, putative
PF3D7_1128000.1	1087314	1093105	5370	+	4	11820	2.20112	conserved Plasmodium protein, unknown function
PF3D7_1128000.2	1087314	1093105	5331	+	4	11691	2.19302	conserved Plasmodium protein, unknown function
PF3D7_1128100	1094909	1095931	747	-	3	2212	2.96118	prefoldin subunit 5, putative
PF3D7_1128200	1097117	1097527	411	+	1	973	2.3674	multiprotein-bridging factor 1, putative
PF3D7_1128900	1118249	1120685	1869	+	4	4220	2.25789	conserved Plasmodium protein, unknown function
PF3D7_1129000	1121930	1123377	966	+	4	5290	5.47619	spermidine synthase
PF3D7_1129100	1125952	1127310	1359	+	1	20943	15.4106	parasitophorous vacuolar protein 1
PF3D7_1129200	1128774	1130813	1182	+	4	5984	5.06261	26S proteasome regulatory subunit RPN7, putative
PF3D7_1129300	1131294	1136834	5541	-	1	15120	2.72875	conserved Plasmodium protein, unknown function
PF3D7_1130100	1163094	1163357	264	-	1	5459	20.678	60S ribosomal protein L38
PF3D7_1130200	1165221	1166171	951	+	1	20943	22.0221	60S ribosomal protein P0
PF3D7_1130300	1166588	1166687	100	+	1	650	6.5	small nucleolar RNA snoR13
PF3D7_1130310	1166812	1166914	103	+	1	565	5.48544	small nucleolar RNA snoR14a
PF3D7_1130400	1168879	1170198	1320	+	1	5163	3.91136	26S protease regulatory subunit 6A, putative
PF3D7_1131100	1195988	1198309	2322	-	1	5947	2.56115	serpentine receptor, putative
PF3D7_1131200	1199253	1201805	1146	+	6	2499	2.18063	conserved Plasmodium protein, unknown function
PF3D7_1132200	1248310	1250232	1635	-	2	4573	2.79694	T-complex protein 1 subunit alpha
PF3D7_1132600	1266250	1267584	1161	-	2	2774	2.38932	pre-mRNA-splicing factor 38A, putative
PF3D7_1132800	1271204	1271980	777	+	1	8906	11.462	aquaglyceroporin
PF3D7_1133000	1275574	1275663	90	+	1	578	6.42222	conserved Plasmodium protein, unknown function
PF3D7_1133200	1281284	1287633	6219	-	2	25312	4.07011	conserved Plasmodium protein, unknown function
PF3D7_1133300	1290501	1291601	1101	+	1	3646	3.31153	LEM3/CDC50 family protein, putative
PF3D7_1133400	1293856	1295724	1869	+	1	13093	7.00535	apical membrane antigen 1
PF3D7_1133700	1302173	1305987	2994	+	2	9859	3.29292	FHA domain-containing protein, putative
PF3D7_1133800	1309024	1311793	2574	+	2	7854	3.05128	RNA (uracil-5-)methyltransferase, putative
PF3D7_1134000	1320114	1322105	1992	+	1	4451	2.23444	heat shock protein 70
PF3D7_1134100	1323043	1324314	1272	-	1	2931	2.30425	protein disulfide isomerase
PF3D7_1134500	1344303	1349763	5235	+	2	12050	2.30181	alpha/beta hydrolase, putative
PF3D7_1134800	1367186	1368809	1464	+	2	3174	2.16803	coatomer subunit delta
PF3D7_1135400	1384378	1385115	738	-	1	2285	3.09621	conserved Plasmodium protein, unknown function
PF3D7_1135700	1396433	1396764	225	-	2	650	2.88889	conserved Plasmodium protein, unknown function
PF3D7_1135900	1398486	1400601	891	-	10	8155	9.15264	3-oxo-5-alpha-steroid 4-dehydrogenase, putative
PF3D7_1136200	1417466	1420071	2040	-	5	4618	2.26373	conserved Plasmodium protein, unknown function
PF3D7_1136300	1422744	1426201	3297	+	2	13797	4.18471	tudor staphylococcal nuclease
PF3D7_1136400	1427011	1429671	2661	-	1	10781	4.05148	signal recognition particle subunit SRP72, putative
PF3D7_1136500.1	1433141	1435170	972	-	8	8972	9.23045	casein kinase 1
PF3D7_1136500.2	1431881	1435170	975	-	9	8361	8.57538	casein kinase 1
PF3D7_1136600	1441503	1445471	3969	+	1	9189	2.31519	conserved Plasmodium protein, unknown function
PF3D7_1136700.1	1446489	1448505	1266	+	7	3127	2.46998	conserved Plasmodium protein, unknown function
PF3D7_1136700.2	1446489	1448505	1206	+	6	3035	2.51658	conserved Plasmodium protein, unknown function
PF3D7_1136800	1449690	1451450	1110	-	5	2518	2.26847	DnaJ protein, putative
PF3D7_1136900	1456151	1460319	4026	+	2	15392	3.82315	subtilisin-like protease 2
PF3D7_1137000	1461301	1461498	198	-	1	2619	13.2273	U2 spliceosomal RNA
PF3D7_1137200	1463811	1465058	1248	-	1	2564	2.05449	apical exonemal protein
PF3D7_1137300	1466197	1468266	2070	-	1	6179	2.98502	CLPTM1 domain-containing protein, putative
PF3D7_1137500	1473505	1474116	519	-	2	1327	2.55684	apicoplast ribosomal protein S14p/S29e precursor, putative
PF3D7_1138000	1487594	1496143	8550	+	1	20452	2.39205	conserved Plasmodium protein, unknown function
PF3D7_1138500	1518464	1521238	2775	+	1	6769	2.43928	protein phosphatase PPM2
PF3D7_1138700	1525654	1531744	5613	-	4	13884	2.47354	conserved Plasmodium protein, unknown function
PF3D7_1139700	1582995	1584512	1518	-	1	4784	3.15152	adrenodoxin reductase, putative
PF3D7_1139900	1593966	1594951	597	+	4	1270	2.1273	conserved protein, unknown function
PF3D7_1140100	1598550	1599632	387	-	4	1696	4.38243	V-type proton ATPase subunit F, putative
PF3D7_1140200	1601257	1603078	1344	-	2	4171	3.10342	conserved Plasmodium protein, unknown function
PF3D7_1140400	1608006	1608609	504	+	2	4425	8.77976	conserved Plasmodium protein, unknown function
PF3D7_1141300	1659070	1662359	3039	-	2	6899	2.27015	conserved Plasmodium protein, unknown function
PF3D7_1141400	1663621	1665250	1062	+	5	2451	2.30791	phosphatidylinositol N-acetylglucosaminyltransferase subunit H, putative
PF3D7_1141800	1672519	1674557	1185	-	7	2390	2.01688	EELM2 domain-containing protein, putative
PF3D7_1142100	1681868	1690084	8217	-	1	23921	2.91116	conserved Plasmodium protein, unknown function
PF3D7_1142500	1705696	1706573	384	-	3	2332	6.07292	60S ribosomal protein L28
PF3D7_1142600	1708066	1708679	423	-	2	8750	20.6856	60S ribosomal protein L35ae, putative
PF3D7_1142900	1715283	1716806	1524	+	1	3418	2.24278	conserved Plasmodium protein, unknown function
PF3D7_1143100	1720047	1724861	4815	-	1	23791	4.94102	AP2 domain transcription factor AP2-O, putative
PF3D7_1143200	1729793	1730899	966	+	2	4692	4.85714	DnaJ protein, putative
PF3D7_1143300	1731899	1732900	1002	-	1	2702	2.69661	DNA-directed RNA polymerases I and III subunit RPAC1, putative
PF3D7_1143400	1735126	1736572	468	+	6	1624	3.47009	translation initiation factor eIF-1A, putative
PF3D7_1143800	1748439	1751138	2700	+	1	6039	2.23667	oocyst capsule protein Cap93, putative
PF3D7_1144000	1755438	1755935	249	+	2	3534	14.1928	40S ribosomal protein S21
PF3D7_1144300	1759257	1759922	120	-	2	2304	19.2	60S ribosomal protein L41
PF3D7_1144900	1777525	1778928	624	-	4	3229	5.17468	ras-related protein Rab-6
PF3D7_1145200	1789323	1795370	6048	-	1	43067	7.12087	serine/threonine protein kinase, putative
PF3D7_1145300	1798776	1799670	264	-	4	1553	5.88258	cysteine-rich PDZ-binding protein, putative
PF3D7_1146600	1834401	1838773	3906	+	4	16479	4.21889	oocyst rupture protein 1, putative
PF3D7_1147300	1883775	1887860	4086	+	1	8197	2.00612	conserved Plasmodium protein, unknown function
PF3D7_1147400	1888637	1889139	234	-	2	954	4.07692	conserved Plasmodium protein, unknown function
PF3D7_1147700	1897204	1897884	465	+	3	966	2.07742	ATP synthase subunit delta, mitochondrial, putative
PF3D7_1147900	1907055	1907708	654	-	1	2569	3.92813	conserved Plasmodium protein, unknown function
PF3D7_1148200	1920268	1920811	544	+	1	31862	58.5699	unspecified product
PF3D7_1148500	1922656	1922928	273	+	1	92270	337.985	unspecified product
PF3D7_1148600	1925942	1933150	7209	+	1	128626	17.8424	18S ribosomal RNA
PF3D7_1148700	1934333	1935582	1113	-	2	3546	3.18598	Plasmodium exported protein (PHISTc), unknown function
PF3D7_1148900	1945778	1946047	270	+	1	906	3.35556	Plasmodium exported protein, unknown function
PF3D7_1149100.1	1972400	1973874	1353	+	2	10435	7.71249	Plasmodium exported protein, unknown function
PF3D7_1149100.2	1972400	1973874	1350	+	2	10434	7.72889	Plasmodium exported protein, unknown function
PF3D7_1149200	1976407	1979804	3273	+	2	88890	27.1586	ring-infected erythrocyte surface antigen
PF3D7_1149400	1985870	1986639	630	-	2	2188	3.47302	Plasmodium exported protein, unknown function
PF3D7_1200700	61556	64336	2781	-	1	14023	5.04243	acyl-CoA synthetase
PF3D7_1201000	76846	79067	1962	-	2	5274	2.68807	Plasmodium exported protein (PHISTb), unknown function
PF3D7_1201200	89934	90749	666	+	2	6137	9.21471	Plasmodium exported protein (PHISTa-like), unknown function
PF3D7_1201900	107338	108202	624	-	2	2136	3.42308	conserved protein, unknown function
PF3D7_1202600	148238	155478	6543	-	6	21561	3.29528	conserved protein, unknown function
PF3D7_1202900	162429	162722	294	-	1	15241	51.8401	high mobility group protein B1
PF3D7_1203100	171507	172136	513	-	2	1216	2.37037	conserved Plasmodium protein, unknown function
PF3D7_1203400	178162	181914	3753	+	1	9984	2.66027	major facilitator superfamily domain-containing protein, putative
PF3D7_1203700	187146	188842	1044	-	3	20149	19.2998	nucleosome assembly protein
PF3D7_1203800	190105	193113	3009	-	1	11037	3.668	unspecified product
PF3D7_1203900	194144	195462	444	+	5	3267	7.35811	ubiquitin-conjugating enzyme E2
PF3D7_1204300	205491	205976	486	-	1	8966	18.4486	eukaryotic translation initiation factor 5A
PF3D7_1204900	217184	218239	393	+	6	1850	4.70738	probable protein, unknown function
PF3D7_1205500	242811	248168	5358	+	1	25041	4.67357	zinc finger protein, putative
PF3D7_1205600	249336	251399	1002	-	8	2335	2.33034	tetratricopeptide repeat protein, putative
PF3D7_1205700	253155	254123	969	+	1	2575	2.65738	targeted glyoxalase II
PF3D7_1205800	256367	263731	6855	+	4	33480	4.88403	high mobility group protein B3, putative
PF3D7_1206000	270300	271214	915	-	1	7184	7.85137	shewanella-like protein phosphatase 2
PF3D7_1206200	275744	279336	2955	-	3	10330	3.49577	eukaryotic translation initiation factor 3 subunit C, putative
PF3D7_1206300	281020	289302	8283	-	1	22107	2.66896	conserved Plasmodium protein, unknown function
PF3D7_1206700	301129	302826	1698	-	1	8910	5.24735	eukaryotic translation initiation factor 5, putative
PF3D7_1207000	313869	321908	7839	-	3	17787	2.26904	conserved Plasmodium protein, unknown function
PF3D7_1207100	324336	326858	2523	-	1	7241	2.87	small subunit rRNA processing factor, putative
PF3D7_1208300	388545	389147	474	+	2	1877	3.95992	mitochondrial ACP precursor, putative
PF3D7_1208900	415404	419732	4329	+	1	11702	2.70316	protein phosphatase PPM11, putative
PF3D7_1209300	428495	432880	4386	-	1	12389	2.82467	telomere repeat-binding zinc finger protein
PF3D7_1209400	436092	438470	2379	+	1	4952	2.08155	cytosolic iron-sulfur protein assembly protein 1, putative
PF3D7_1209800	447381	447950	570	-	1	1161	2.03684	ATP synthase mitochondrial F1 complex assembly factor 1, putative
PF3D7_1210000	452595	453828	1020	+	2	2602	2.55098	50S ribosomal protein L1, apicoplast, putative
PF3D7_1210100	455304	456236	933	-	1	3024	3.24116	syntaxin, Qa-SNARE family
PF3D7_1211400	505344	506662	735	+	4	3530	4.80272	heat shock protein DNAJ homologue Pfj4
PF3D7_1211800	526109	527780	1146	+	2	44157	38.5314	polyubiquitin
PF3D7_1212000	534912	535915	618	-	3	1829	2.95955	glutathione peroxidase-like thioredoxin peroxidase
PF3D7_1212100	536951	538627	1677	+	1	3520	2.09899	peripheral plastid protein 1, putative
PF3D7_1212500	552102	553853	1752	-	1	3565	2.03482	glycerol-3-phosphate 1-O-acyltransferase
PF3D7_1212700	558047	562180	4134	-	1	25581	6.18795	eukaryotic translation initiation factor 3 subunit A, putative
PF3D7_1212800	565966	566931	966	+	1	2334	2.41615	iron-sulfur subunit of succinate dehydrogenase
PF3D7_1212900	568569	571835	3267	-	1	31407	9.61341	bromodomain protein 2, putative
PF3D7_1213000	575540	576292	753	+	1	1716	2.27888	unspecified product
PF3D7_1213100	576417	576580	164	-	1	923	5.62805	U1 spliceosomal RNA
PF3D7_1213600	586809	587090	282	+	1	904	3.20567	dynein light chain 1, putative
PF3D7_1214900	618764	620111	738	+	5	3078	4.17073	conserved Plasmodium membrane protein, unknown function
PF3D7_1216200	648889	650552	1104	+	5	3970	3.59601	glycerol-3-phosphate dehydrogenase [NAD(+)], putative
PF3D7_1216300	651398	651856	459	-	1	2786	6.06972	signal recognition particle subunit SRP19
PF3D7_1216400	653670	656435	2766	+	1	8205	2.96638	conserved Plasmodium membrane protein, unknown function
PF3D7_1216500	657339	658004	666	-	1	3536	5.30931	male development gene 1
PF3D7_1216800	666884	666955	72	+	1	146	2.02778	tRNA Proline
PF3D7_1216900	670447	673266	2820	+	1	18774	6.65745	DNA-binding chaperone, putative
PF3D7_1217200	678602	681961	3360	+	1	9892	2.94405	multiple RNA-binding domain-containing protein 1, putative
PF3D7_1217400	686307	688871	2565	-	1	6154	2.39922	conserved Plasmodium protein, unknown function
PF3D7_1217500	693067	693711	645	+	1	16363	25.369	conserved Plasmodium protein, unknown function
PF3D7_1218000	703895	704953	1059	+	1	6682	6.30973	thrombospondin-related apical membrane protein
PF3D7_1218100	706227	708196	1392	+	5	3093	2.22198	conserved Plasmodium protein, unknown function
PF3D7_1218300	717955	719820	1866	+	1	3870	2.07395	AP-2 complex subunit mu, putative
PF3D7_1218400	720886	723448	1437	-	10	7790	5.42102	triose or hexose phosphate/phosphate translocator, putative
PF3D7_1219000	746002	754926	8925	+	1	22399	2.50969	formin 2
PF3D7_1220900	831252	832052	801	-	1	4354	5.43571	heterochromatin protein 1
PF3D7_1221200	849840	850652	321	+	4	704	2.19315	conserved Plasmodium protein, unknown function
PF3D7_1221900	872361	874940	2580	-	1	8817	3.41744	conserved Plasmodium membrane protein, unknown function
PF3D7_1222300	883567	886032	2466	-	1	19460	7.89132	endoplasmin, putative
PF3D7_1222700	918722	919336	615	+	1	11881	19.3187	glideosome-associated protein 45
PF3D7_1223000	925375	926249	405	-	4	2078	5.13086	conserved Plasmodium protein, unknown function
PF3D7_1223100	927825	929991	1326	-	3	16493	12.4382	cAMP-dependent protein kinase regulatory subunit
PF3D7_1223200	932917	934281	1365	+	1	3087	2.26154	nucleus export protein BRR6, putative
PF3D7_1223400	941125	946745	4857	+	6	34992	7.20445	phospholipid-transporting ATPase, putative
PF3D7_1223700	968980	970073	822	+	2	2256	2.74453	vacuolar iron transporter
PF3D7_1224000	974372	975541	1170	+	1	4311	3.68462	GTP cyclohydrolase I
PF3D7_1224100	976820	977889	579	-	4	4115	7.10708	conserved Plasmodium protein, unknown function
PF3D7_1224300	988628	991255	2628	+	1	28704	10.9224	polyadenylate-binding protein, putative
PF3D7_1224500	998353	999275	822	+	2	2554	3.10706	histone chaperone ASF1, putative
PF3D7_1224900	1010832	1011342	321	-	2	943	2.93769	splicing factor 3B subunit 6, putative
PF3D7_1225600	1035261	1038155	2346	-	5	4836	2.06138	conserved Plasmodium protein, unknown function
PF3D7_1226300	1065796	1066683	888	+	1	4957	5.58221	haloacid dehalogenase-like hydrolase, putative
PF3D7_1226400	1067470	1071309	2571	-	5	6295	2.44846	conserved Plasmodium protein, unknown function
PF3D7_1226800	1085387	1087264	1146	+	5	3174	2.76963	ataxin-3, putative
PF3D7_1227000	1092160	1092651	492	-	1	1093	2.22154	conserved Plasmodium protein, unknown function
PF3D7_1227500	1114025	1121093	6912	-	2	19234	2.7827	protein SOC2, putative
PF3D7_1227700	1128939	1131686	2316	-	3	6865	2.96416	conserved Plasmodium protein, unknown function
PF3D7_1228500	1158554	1160062	1230	+	3	2518	2.04715	RNA pseudouridylate synthase, putative
PF3D7_1228600	1160729	1162960	2232	-	1	135460	60.69	merozoite surface protein 9
PF3D7_1228800	1169557	1179186	9630	-	1	40041	4.15794	WD repeat-containing protein, putative
PF3D7_1229100	1192888	1199214	6327	-	1	22294	3.52363	multidrug resistance-associated protein 2
PF3D7_1229300	1204991	1207963	2973	+	1	21811	7.33636	conserved Plasmodium protein, unknown function
PF3D7_1229400	1208912	1209542	351	+	2	2108	6.0057	macrophage migration inhibitory factor
PF3D7_1229700	1218181	1218766	249	+	3	585	2.3494	conserved Plasmodium protein, unknown function
PF3D7_1229800	1219136	1226465	6825	-	4	25525	3.73993	myosin J, putative
PF3D7_1231100	1276257	1277734	642	+	7	2871	4.47196	ras-related protein Rab-2
PF3D7_1231200	1278460	1279611	1152	-	1	5738	4.9809	conserved Plasmodium protein, unknown function
PF3D7_1231400	1290685	1297069	5835	-	3	15651	2.68226	amino acid transporter, putative
PF3D7_1231500	1299608	1300027	420	+	1	937	2.23095	mitosis protein dim1, putative
PF3D7_1232100	1328311	1331371	2157	-	2	5895	2.73296	60 kDa chaperonin
PF3D7_1232400	1337710	1338816	1107	-	1	3682	3.32611	conserved protein, unknown function
PF3D7_1232500	1339845	1343314	3216	-	2	25424	7.90547	CG2-related protein, putative
PF3D7_1232600	1344263	1345351	1089	+	1	3870	3.55372	conserved Plasmodium protein, unknown function
PF3D7_1232800	1350645	1351283	429	-	3	1508	3.51515	conserved Plasmodium protein, unknown function
PF3D7_1233600	1385707	1402218	16320	+	3	35033	2.14663	asparagine and aspartate rich protein 1
PF3D7_1233800	1405182	1405968	621	-	3	1601	2.5781	conserved Plasmodium protein, unknown function
PF3D7_1233900	1407674	1411030	3081	+	3	6733	2.18533	sentrin-specific protease 1
PF3D7_1234900	1458233	1459182	456	+	3	2825	6.19518	conserved Plasmodium protein, unknown function
PF3D7_1235300	1470713	1475701	4989	+	1	26744	5.36059	CCR4-NOT transcription complex subunit 4, putative
PF3D7_1235600	1484306	1485911	1329	+	3	3661	2.7547	serine hydroxymethyltransferase
PF3D7_1236100	1506932	1508269	1338	-	1	4986	3.72646	clustered-asparagine-rich protein
PF3D7_1236400	1522463	1524632	1818	+	3	4360	2.39824	conserved Plasmodium protein, unknown function
PF3D7_1236700	1529821	1531347	1527	-	1	3967	2.5979	S-adenosyl-methyltransferase, putative
PF3D7_1236800	1532248	1534077	1530	+	3	4648	3.03791	protein-S-isoprenylcysteine O-methyltransferase, putative
PF3D7_1236900	1534519	1535879	1119	-	3	3104	2.77391	conserved Plasmodium protein, unknown function
PF3D7_1237700	1572371	1573557	633	+	2	11164	17.6367	conserved protein, unknown function
PF3D7_1237900	1577181	1580747	3567	+	1	13074	3.66526	conserved Plasmodium protein, unknown function
PF3D7_1238000	1581984	1582987	447	+	3	2612	5.8434	COPI associated protein, putative
PF3D7_1238100	1583909	1584595	687	-	1	1802	2.623	calcyclin binding protein, putative
PF3D7_1238600	1601515	1602696	1182	-	1	3757	3.17851	sphingomyelin phosphodiesterase
PF3D7_1238800	1610363	1612741	2379	+	1	7828	3.29046	acyl-CoA synthetase
PF3D7_1238900	1615323	1616852	1530	-	1	4832	3.15817	protein kinase 2
PF3D7_1239000	1621237	1623705	2469	-	1	6067	2.45727	HD superfamily phosphohydrolase protein, putative
PF3D7_1239200	1634695	1642428	7734	+	1	39230	5.07241	AP2 domain transcription factor, putative
PF3D7_1239700	1655487	1658129	2643	+	1	6849	2.59137	ATP-dependent zinc metalloprotease FTSH 1
PF3D7_1239800	1660451	1677754	17304	+	1	57682	3.33345	conserved Plasmodium protein, unknown function
PF3D7_1240100	1685094	1685411	318	-	1	1128	3.54717	early transcribed membrane protein 12
PF3D7_1240600	1719574	1727456	7080	+	2	33002	4.6613	erythrocyte membrane protein 1, PfEMP1
PF3D7_1241900	1784380	1786410	2031	+	1	5133	2.52733	tetratricopeptide repeat protein, putative
PF3D7_1242700	1803653	1804483	414	+	2	5319	12.8478	40S ribosomal protein S17, putative
PF3D7_1242800	1805380	1807356	1380	-	4	5616	4.06957	rab specific GDP dissociation inhibitor
PF3D7_1242900	1808878	1809622	288	-	3	1029	3.57292	mitochondrial import inner membrane translocase subunit TIM13, putative
PF3D7_1243400	1818738	1820069	1332	+	1	3919	2.94219	conserved Plasmodium protein, unknown function
PF3D7_1243600	1825959	1826884	348	+	3	10797	31.0259	translation initiation factor SUI1, putative
PF3D7_1243700	1829660	1831057	1398	+	1	8685	6.21245	ubiquitin-conjugating enzyme E2, putative
PF3D7_1243800	1831484	1832949	1113	-	4	6639	5.96496	WD repeat-containing protein 82, putative
PF3D7_1244100	1847677	1852156	3891	+	5	9153	2.35235	N-alpha-acetyltransferase 15, NatA auxiliary subunit, putative
PF3D7_1244300	1857849	1858090	242	+	1	979	4.04545	ACEA small nucleolar RNA U3
PF3D7_1244400	1859656	1863846	4008	+	2	27658	6.9007	RNA-binding protein, putative
PF3D7_1244600	1868533	1869531	999	-	1	2833	2.83584	ADP-ribosylation factor GTPase-activating protein
PF3D7_1244700	1871919	1872911	669	+	3	3587	5.36173	conserved Plasmodium protein, unknown function
PF3D7_1244800	1873194	1875287	1008	-	9	2994	2.97024	cytoplasmic translation machinery associated protein, putative
PF3D7_1245500	1896891	1899837	1383	+	11	2932	2.12003	conserved Plasmodium protein, unknown function
PF3D7_1245800	1908149	1909764	1296	+	3	3425	2.64275	epsin-like protein, putative
PF3D7_1246200	1920784	1921914	1131	+	1	63499	56.1441	actin I
PF3D7_1246300	1925642	1929438	2667	+	10	7280	2.72966	conserved Plasmodium protein, unknown function
PF3D7_1246400	1931970	1932584	615	+	1	9716	15.7984	myosin A tail domain interacting protein
PF3D7_1246800	1941365	1942491	786	+	4	3087	3.92748	signal recognition particle receptor subunit beta, putative
PF3D7_1247400	1955124	1956038	915	-	1	2066	2.25792	peptidyl-prolyl cis-trans isomerase FKBP35
PF3D7_1247700	1964862	1966025	1164	-	1	3614	3.10481	conserved Plasmodium protein, unknown function
PF3D7_1248500	1983480	1984349	870	-	1	22492	25.8529	bax inhibitor 1, putative
PF3D7_1248700	1994775	2000744	5970	+	1	36176	6.05963	conserved Plasmodium protein, unknown function
PF3D7_1248900	2002723	2004030	1308	-	1	3819	2.91972	26S protease regulatory subunit 8, putative
PF3D7_1249400	2016325	2016756	432	-	1	1564	3.62037	conserved Plasmodium protein, unknown function
PF3D7_1249800	2030910	2039852	8496	-	4	21370	2.5153	THO complex subunit 2, putative
PF3D7_1250000	2044120	2044626	507	+	1	1212	2.39053	rRNA-processing protein FCF2, putative
PF3D7_1250200	2059108	2063227	3120	+	6	16185	5.1875	CSC1-like protein, putative
PF3D7_1250300	2064987	2066040	894	+	2	3052	3.41387	vacuolar protein sorting-associated protein 26, putative
PF3D7_1250700	2075792	2076517	534	+	2	1359	2.54494	conserved Plasmodium protein, unknown function
PF3D7_1251100	2089484	2090220	405	+	3	1612	3.98025	conserved Plasmodium protein, unknown function
PF3D7_1251200	2092087	2094231	1809	+	3	22523	12.4505	coronin
PF3D7_1251300	2095062	2096508	633	-	7	2624	4.14534	thymidylate kinase
PF3D7_1252100	2114628	2122487	6648	-	8	42362	6.37214	rhoptry neck protein 3
PF3D7_1252300	2128400	2128786	258	-	2	1919	7.43798	conserved Plasmodium protein, unknown function
PF3D7_1252400	2136053	2144874	8672	+	2	37158	4.28482	reticulocyte binding protein homologue 3, pseudogene
PF3D7_1252800	2159573	2161615	1881	+	2	4004	2.12865	Plasmodium exported protein (PHISTb), unknown function
PF3D7_1253000	2168181	2169759	1410	+	2	3371	2.39078	gametocyte erythrocyte cytosolic protein
PF3D7_1253100	2171342	2172349	867	+	2	2651	3.05767	Plasmodium exported protein (PHISTa), unknown function
PF3D7_1301600	89319	93352	3633	-	4	55211	15.1971	erythrocyte binding antigen-140
PF3D7_1301700	99548	100521	738	+	2	10590	14.3496	CX3CL1-binding protein 2
PF3D7_1302000	112792	113815	939	-	2	3955	4.21193	EMP1-trafficking protein
PF3D7_1302100	121636	122289	654	-	1	2506	3.8318	gamete antigen 27/25
PF3D7_1302300	126611	127141	369	-	2	1015	2.75068	Plasmodium exported protein, unknown function
PF3D7_1302800	150783	151635	585	-	2	10079	17.2291	40S ribosomal protein S7, putative
PF3D7_1303400	165013	168081	3069	-	1	8305	2.70609	LisH domain-containing protein, putative
PF3D7_1303500	169874	175789	5763	-	2	22835	3.96235	sodium/hydrogen exchanger, Na+, H+ antiporter
PF3D7_1303600	178783	179353	384	+	2	804	2.09375	conserved Plasmodium protein, unknown function
PF3D7_1304400	232493	234447	1842	-	2	3760	2.04126	conserved Plasmodium protein, unknown function
PF3D7_1304500	235800	236435	636	-	1	1361	2.13994	small heat shock protein, putative
PF3D7_1304900	245199	246175	381	+	4	913	2.39633	DNA-directed RNA polymerase II subunit RPB11, putative
PF3D7_1305100	252526	253788	1263	-	1	2850	2.25653	conserved Plasmodium protein, unknown function
PF3D7_1306400	297178	298359	1182	-	1	5977	5.05668	26S protease regulatory subunit 10B, putative
PF3D7_1307500	338189	338455	267	-	1	2860	10.7116	conserved Plasmodium protein, unknown function
PF3D7_1307600	339927	341888	1860	-	2	4187	2.25108	DNA-directed RNA polymerase alpha chain, putative
PF3D7_1307700	344525	348232	3708	+	1	7825	2.1103	conserved Plasmodium protein, unknown function
PF3D7_1307900	351840	354818	2661	-	2	6557	2.46411	tripartite motif protein, putative
PF3D7_1308000	356709	359201	2493	+	1	9685	3.88488	conserved Plasmodium membrane protein, unknown function
PF3D7_1308300	372260	372646	249	+	2	5007	20.1084	40S ribosomal protein S27
PF3D7_1308400	373487	392072	18444	-	2	42077	2.28134	conserved Plasmodium protein, unknown function
PF3D7_1308800	403788	406703	1473	-	13	2990	2.02987	tyrosine recombinase
PF3D7_1309100	418820	420121	489	+	3	5790	11.8405	60S ribosomal protein L24, putative
PF3D7_1309200	424232	427036	2484	+	3	9334	3.75765	protein phosphatase PPM6, putative
PF3D7_1309300	427457	429643	2187	-	1	4811	2.19982	U4/U6 small nuclear ribonucleoprotein PRP3, putative
PF3D7_1309500	436676	437305	630	-	1	1825	2.89683	H/ACA ribonucleoprotein complex subunit 1, putative
PF3D7_1310200	454061	454636	435	+	2	1832	4.21149	conserved Plasmodium protein, unknown function
PF3D7_1310400	458961	462368	3408	+	1	7165	2.10241	conserved Plasmodium protein, unknown function
PF3D7_1310600	465091	466552	624	-	6	3061	4.90545	ras-related protein Rab-5B
PF3D7_1310700	468232	468663	432	-	1	18022	41.7176	RNA-binding protein, putative
PF3D7_1311400	487511	488824	1314	+	1	4034	3.07002	AP-1 complex subunit mu-1
PF3D7_1311500	489927	491609	1263	-	2	6334	5.01504	26S protease regulatory subunit 7, putative
PF3D7_1311800	501790	505047	3258	+	1	14459	4.438	M1-family alanyl aminopeptidase
PF3D7_1311900	507900	509735	1836	+	1	6159	3.35458	V-type proton ATPase catalytic subunit A
PF3D7_1312500	526863	527060	198	-	1	680	3.43434	conserved Plasmodium protein, unknown function
PF3D7_1312700	532270	533958	1689	-	1	5736	3.39609	conserved Plasmodium protein, unknown function
PF3D7_1312800	536702	544523	7086	-	2	27832	3.92774	conserved Plasmodium protein, unknown function
PF3D7_1312900	548586	552841	3768	+	3	20259	5.37659	eukaryotic translation initation factor 4 gamma
PF3D7_1313000	553752	554251	231	-	2	652	2.82251	ubiquitin-like protein nedd8 homologue, putative
PF3D7_1313400	569840	572332	2493	-	1	5414	2.17168	DEAD box helicase, putative
PF3D7_1314500	622691	623715	621	-	4	1344	2.16425	transmembrane emp24 domain-containing protein, putative
PF3D7_1315000	636812	637612	645	+	2	3189	4.94419	conserved Plasmodium protein, unknown function
PF3D7_1315400	647986	650511	1260	-	5	8760	6.95238	zinc finger (CCCH type) protein, putative
PF3D7_1315500	652794	653838	552	-	4	1498	2.71377	conserved Plasmodium protein, unknown function
PF3D7_1315600	655207	657259	630	-	9	5287	8.39206	CDP-diacylglycerol--inositol 3-phosphatidyltransferase
PF3D7_1316100	673717	678522	4806	+	1	13708	2.85227	inositol polyphosphate kinase, putative
PF3D7_1316200	680039	680855	675	+	2	1758	2.60444	ADP-ribosylation factor, putative
PF3D7_1316600	691014	694125	2691	+	3	15784	5.86548	choline-phosphate cytidylyltransferase
PF3D7_1316900	701047	703923	2877	-	1	10096	3.50921	conserved Plasmodium protein, unknown function
PF3D7_1317000	708346	710268	1923	+	1	4980	2.5897	U4/U6.U5 tri-snRNP-associated protein 2, putative
PF3D7_1317100	711944	714961	3018	+	1	6299	2.08714	DNA replication licensing factor MCM4
PF3D7_1317300	730859	732293	891	-	5	1947	2.18519	conserved Plasmodium protein, unknown function
PF3D7_1317800	740527	741454	438	+	2	7870	17.968	40S ribosomal protein S19
PF3D7_1318000	745947	746525	579	-	1	1221	2.10881	conserved Plasmodium membrane protein, unknown function
PF3D7_1318400	760326	764139	3657	-	2	7964	2.17774	structural maintenance of chromosomes protein 2, putative
PF3D7_1318700	770646	772895	2250	-	1	8476	3.76711	conserved Plasmodium protein, unknown function
PF3D7_1318800	774790	776745	1956	-	1	5464	2.79346	translocation protein SEC63, putative
PF3D7_1319100	789437	791848	2412	+	1	5524	2.29022	ubiquitin carboxyl-terminal hydrolase MINDY, putative
PF3D7_1319400	801712	806029	3213	+	10	11151	3.47059	conserved Plasmodium protein, unknown function
PF3D7_1320100	834180	835308	579	-	5	1292	2.23143	ATP-dependent Clp protease adapter protein ClpS
PF3D7_1320600	847090	848383	651	+	5	4874	7.48694	ras-related protein Rab-11A
PF3D7_1321100	861442	872332	10344	-	4	36562	3.53461	conserved Plasmodium protein, unknown function
PF3D7_1321500.1	890106	894782	3420	-	9	13796	4.03392	3',5'-cyclic nucleotide phosphodiesterase, putative
PF3D7_1321500.2	890106	894782	3420	-	9	13797	4.03421	3',5'-cyclic nucleotide phosphodiesterase, putative
PF3D7_1321700	902383	905166	2595	+	2	6521	2.51291	splicing factor 1
PF3D7_1321800	908503	909639	780	+	4	2074	2.65897	protein transport protein SFT2, putative
PF3D7_1321900	911667	912545	879	-	1	6946	7.90216	conserved Plasmodium protein, unknown function
PF3D7_1322000	916360	918594	1698	+	4	5718	3.36749	nucleoside-diphosphatase, putative
PF3D7_1322500	953154	955789	2031	+	6	4705	2.31659	palmitoyltransferase DHHC5
PF3D7_1323100	965486	966280	573	-	2	7033	12.274	60S ribosomal protein L6, putative
PF3D7_1323200	968110	968798	372	-	3	1773	4.76613	V-type proton ATPase subunit G, putative
PF3D7_1323400	971847	973036	573	-	4	9145	15.9599	60S ribosomal protein L23
PF3D7_1323700	982611	983801	912	+	3	19533	21.4178	glideosome associated protein with multiple membrane spans 1
PF3D7_1323900	989468	990598	1131	+	1	2414	2.13439	protein BCP1, putative
PF3D7_1324900	1041157	1042107	951	+	1	13341	14.0284	L-lactate dehydrogenase
PF3D7_1325100	1044552	1045865	1314	-	1	5607	4.26712	phosphoribosylpyrophosphate synthetase
PF3D7_1325300	1050915	1051319	405	+	1	813	2.00741	conserved Plasmodium protein, unknown function
PF3D7_1325400	1052751	1063310	10560	+	1	28946	2.7411	conserved Plasmodium protein, unknown function
PF3D7_1325600	1067097	1067685	426	+	2	901	2.11502	mitochondrial fission 1 protein, putative
PF3D7_1325700	1068050	1068635	240	-	3	550	2.29167	conserved Plasmodium protein, unknown function
PF3D7_1326000	1085786	1086861	492	-	4	1688	3.43089	conserved Plasmodium protein, unknown function
PF3D7_1326200	1090329	1091327	798	-	3	2130	2.66917	conserved Plasmodium protein, unknown function
PF3D7_1327300	1145719	1151106	5388	+	1	29845	5.53916	conserved Plasmodium protein, unknown function
PF3D7_1327400	1152603	1153511	909	-	1	4323	4.75578	conserved Plasmodium protein, unknown function
PF3D7_1327600	1159366	1159980	615	+	1	1577	2.56423	nicotinamide/nicotinic acid mononucleotide adenylyltransferase
PF3D7_1328100	1184208	1185020	813	+	1	3057	3.76015	proteasome subunit beta type-7, putative
PF3D7_1328300	1196229	1197509	999	-	3	7647	7.65465	conserved Plasmodium protein, unknown function
PF3D7_1328500	1204186	1207200	3015	-	1	9903	3.28458	alpha/beta-hydrolase, putative
PF3D7_1328800	1214907	1215728	822	+	1	2836	3.45012	transcriptional regulatory protein sir2a
PF3D7_1329100	1227372	1234418	6483	-	4	15711	2.42342	myosin F, putative
PF3D7_1329500	1252059	1257973	5535	+	3	18750	3.38753	conserved Plasmodium protein, unknown function
PF3D7_1329600	1258956	1259861	906	-	1	4803	5.30132	conserved Plasmodium protein, unknown function
PF3D7_1330100	1274448	1275008	561	+	1	1825	3.25312	conserved Plasmodium protein, unknown function
PF3D7_1330200	1275104	1275899	681	+	2	2518	3.6975	conserved Plasmodium protein, unknown function
PF3D7_1330400.1	1279800	1281285	855	-	5	3612	4.22456	ER lumen protein retaining receptor 1, putative, unspecified product
PF3D7_1330400.2	1280063	1281285	675	-	4	2466	3.65333	ER lumen protein retaining receptor 1, putative, unspecified product
PF3D7_1330800	1294615	1296966	1791	+	2	7258	4.05248	RNA-binding protein, putative
PF3D7_1330900	1294943	1295022	80	+	1	968	12.1	small nucleolar RNA snoR17
PF3D7_1331200	1306654	1307999	1224	+	2	4408	3.60131	conserved Plasmodium protein, unknown function
PF3D7_1331300	1309177	1310006	555	+	2	2981	5.37117	signal peptidase 21 kDa subunit
PF3D7_1331500	1313924	1315786	1863	+	1	6686	3.58884	conserved Plasmodium protein, unknown function
PF3D7_1331600	1316496	1317806	687	-	4	2988	4.34934	protein tyrosine phosphatase-like protein, putative
PF3D7_1331800	1324012	1324802	420	+	2	5969	14.2119	60S ribosomal protein L23, putative
PF3D7_1332000	1325913	1327532	846	-	5	2893	3.41962	syntaxin, Qa-SNARE family
PF3D7_1332100	1329491	1331059	1569	+	1	5394	3.43786	conserved Plasmodium membrane protein, unknown function
PF3D7_1332200	1332299	1335592	3006	+	3	11667	3.88124	conserved Plasmodium protein, unknown function
PF3D7_1332300	1336401	1336892	492	+	1	2177	4.4248	trafficking protein particle complex subunit 2, putative
PF3D7_1332400	1337117	1339693	2577	-	1	6925	2.68723	nucleotidyltransferase, putative
PF3D7_1332500	1340786	1341442	657	+	1	3885	5.91324	SAM-dependent RNA methyltransferase, putative
PF3D7_1332600	1342012	1343805	1794	-	1	5304	2.95652	apurinic/apyrimidinic endonuclease Apn1, putative
PF3D7_1333300	1368081	1368716	636	-	1	1732	2.72327	transmembrane protein Tmp21 homologue, putative
PF3D7_1333400	1370083	1370799	717	+	1	1675	2.33612	conserved protein, unknown function
PF3D7_1333700	1379109	1379621	513	-	1	1554	3.02924	histone H3-like centromeric protein CSE4
PF3D7_1333800	1382631	1383335	705	+	1	1605	2.2766	conserved Plasmodium protein, unknown function
PF3D7_1334700	1411100	1411708	609	-	1	1252	2.05583	MSP7-like protein
PF3D7_1334900	1414878	1415018	141	-	1	547	3.87943	MSP7-like protein, fragment, pseudogene
PF3D7_1335100	1419086	1420141	1056	-	1	38025	36.0085	merozoite surface protein 7
PF3D7_1335300	1428874	1438852	9765	-	2	122797	12.5752	reticulocyte binding protein 2 homologue b
PF3D7_1335400	1440779	1450385	9393	+	2	133364	14.1982	reticulocyte binding protein 2 homologue a
PF3D7_1336700	1482361	1482837	477	-	1	3632	7.61426	conserved Plasmodium protein, unknown function
PF3D7_1337400	1506965	1508977	1755	+	3	5749	3.27578	conserved Plasmodium protein, unknown function
PF3D7_1337800	1528502	1530208	1707	-	1	9150	5.36028	calcium-dependent protein kinase 5
PF3D7_1337900	1534507	1535166	660	+	1	2858	4.3303	conserved Plasmodium protein, unknown function
PF3D7_1338100	1542080	1543981	1512	+	2	5971	3.94907	26S proteasome regulatory subunit RPN3, putative
PF3D7_1338200	1545070	1545735	666	-	1	10651	15.9925	60S ribosomal protein L6-2, putative
PF3D7_1338300	1548692	1550396	1236	+	2	9932	8.0356	elongation factor 1-gamma, putative
PF3D7_1338600	1556659	1559734	2844	-	3	10602	3.72785	conserved Plasmodium protein, unknown function
PF3D7_1338700	1561255	1563123	1869	-	1	8222	4.39914	conserved Plasmodium protein, unknown function
PF3D7_1339300	1583226	1584053	828	+	1	7905	9.5471	conserved Plasmodium protein, unknown function
PF3D7_1339400	1585806	1586399	447	-	2	1600	3.57942	conserved Plasmodium protein, unknown function
PF3D7_1339500	1587028	1587874	336	-	4	812	2.41667	mitochondrial ribosomal protein L49 precursor, putative
PF3D7_1339700	1590510	1596320	5811	-	1	15191	2.61418	conserved Plasmodium protein, unknown function
PF3D7_1340300	1607323	1610190	2868	+	1	5892	2.05439	nucleolar complex protein 2, putative
PF3D7_1340800	1624054	1624490	321	+	2	705	2.19626	mitochondrial pyruvate carrier protein 1, putative
PF3D7_1340900	1627311	1629480	2064	+	2	9098	4.40795	sodium-dependent phosphate transporter
PF3D7_1341100	1632602	1632709	108	-	1	350	3.24074	U6 spliceosomal RNA
PF3D7_1341200	1633860	1634530	555	-	2	5855	10.5495	60S ribosomal protein L18, putative
PF3D7_1341300	1636556	1637833	564	+	3	5455	9.67199	60S ribosomal protein L18-2, putative
PF3D7_1341400	1637268	1637347	80	+	1	171	2.1375	small nucleolar RNA snoR20
PF3D7_1341900	1649113	1650649	744	-	7	1934	2.59946	V-type proton ATPase subunit D, putative
PF3D7_1342000	1653211	1654131	921	-	1	11375	12.3507	40S ribosomal protein S6
PF3D7_1342400	1666832	1668153	1158	-	2	3583	3.09413	casein kinase II beta chain
PF3D7_1342600	1673699	1676539	2457	+	3	28907	11.7652	myosin A
PF3D7_1343000	1696894	1698113	801	+	4	37742	47.1186	phosphoethanolamine N-methyltransferase
PF3D7_1343100	1699683	1700630	948	-	1	12047	12.7078	conserved Plasmodium protein, unknown function
PF3D7_1343300	1707731	1710679	2949	-	1	12457	4.22414	CDT1-like protein, putative
PF3D7_1343700	1724817	1726997	2181	-	1	6109	2.80101	kelch protein K13
PF3D7_1344200	1769129	1771927	2799	+	1	20025	7.15434	heat shock protein 110, putative
PF3D7_1344300	1774275	1779042	4281	-	3	14177	3.31161	zinc finger protein, putative
PF3D7_1344500	1787820	1788869	825	-	3	1813	2.19758	U6 snRNA phosphodiesterase, putative
PF3D7_1345000	1807159	1809617	1011	+	11	3210	3.17507	conserved Plasmodium protein, unknown function
PF3D7_1345100	1809736	1810521	474	-	4	2086	4.40084	thioredoxin 2
PF3D7_1345300	1815075	1815548	255	-	3	651	2.55294	conserved Plasmodium protein, unknown function
PF3D7_1345600	1826411	1827649	1113	+	2	2696	2.42228	inner membrane complex protein
PF3D7_1346100	1843376	1844897	1419	+	2	12302	8.66949	protein transport protein SEC61 subunit alpha
PF3D7_1346300	1849528	1850517	636	+	3	3537	5.56132	DNA/RNA-binding protein Alba 2
PF3D7_1346400	1852898	1870864	17967	+	1	41522	2.31101	conserved Plasmodium protein, unknown function
PF3D7_1347200	1889853	1891121	1269	-	1	18659	14.7037	nucleoside transporter 1
PF3D7_1347500	1897983	1899362	1119	-	2	23708	21.1868	DNA/RNA-binding protein Alba 4
PF3D7_1347700	1908960	1910885	1722	+	3	11501	6.67886	ethanolamine-phosphate cytidylyltransferase
PF3D7_1348200	1927449	1928260	615	+	2	1356	2.20488	step II splicing factor, putative
PF3D7_1348500	1950400	1951847	1044	+	2	2589	2.47989	TBC domain protein, putative
PF3D7_1348600	1953304	1954852	1116	+	4	3153	2.82527	conserved Plasmodium protein, unknown function
PF3D7_1349100	1969769	1970752	591	-	3	1387	2.34687	nucleoside diphosphate hydrolase, putative
PF3D7_1349500	1985337	1995614	10146	-	2	39690	3.91189	conserved Plasmodium protein, unknown function
PF3D7_1349600	1997023	1998282	924	+	2	2121	2.29545	conserved Plasmodium protein, unknown function
PF3D7_1349700	1998815	1999771	768	+	2	2115	2.75391	peptidase, putative
PF3D7_1350100	2005962	2007950	1752	-	2	3612	2.06164	lysine--tRNA ligase
PF3D7_1350200	2009477	2010281	282	-	4	568	2.01418	small nuclear ribonucleoprotein E, putative
PF3D7_1350300	2011168	2012085	918	+	1	1868	2.03486	conserved protein, unknown function
PF3D7_1350500	2015367	2018801	3435	-	1	8978	2.61368	conserved Plasmodium protein, unknown function
PF3D7_1351400	2052108	2053384	612	+	3	7284	11.902	60S ribosomal protein L17, putative
PF3D7_1351600	2055216	2056721	1506	+	1	4065	2.6992	glycerol kinase
PF3D7_1351700	2059616	2063924	3957	+	3	15152	3.82916	inner membrane complex protein 1f, putative
PF3D7_1351800.1	2065373	2066409	693	+	2	3419	4.93362	conserved Plasmodium protein, unknown function
PF3D7_1351800.2	2065373	2066409	708	+	2	3437	4.85452	conserved Plasmodium protein, unknown function
PF3D7_1351900	2067529	2068767	1239	-	1	2810	2.26796	conserved Plasmodium protein, unknown function
PF3D7_1352500	2093365	2094337	627	-	2	13363	21.3126	thioredoxin-related protein, putative
PF3D7_1353000	2118361	2120913	2406	-	2	12684	5.27182	tryptophan-rich protein, pseudogene
PF3D7_1353100	2124272	2125270	858	-	2	4334	5.05128	Plasmodium exported protein, unknown function
PF3D7_1353200	2130531	2131065	414	+	2	2084	5.03382	membrane associated histidine-rich protein
PF3D7_1353300	2132068	2138583	6207	-	2	13184	2.12405	conserved Plasmodium protein, unknown function
PF3D7_1353600	2146181	2147147	666	-	3	3388	5.08709	ER lumen protein retaining receptor
PF3D7_1353800	2151402	2152373	741	-	2	3174	4.2834	proteasome subunit alpha type-4, putative
PF3D7_1353900	2154162	2155217	726	+	4	2521	3.47245	proteasome subunit alpha type-7, putative
PF3D7_1354200	2160318	2162729	2412	-	1	4882	2.02405	inositol-polyphosphate 5-phosphatase, putative
PF3D7_1354300	2164239	2167416	3060	-	2	7819	2.55523	large subunit rRNA methyltransferase, putative
PF3D7_1354400	2169314	2170416	546	-	5	1608	2.94505	V-type proton ATPase 21 kDa proteolipid subunit, putative
PF3D7_1355700	2206592	2210458	3867	-	1	10671	2.7595	NLI interacting factor-like phosphatase, putative
PF3D7_1355800	2214445	2215085	261	+	4	727	2.78544	splicing factor 3B subunit 5, putative
PF3D7_1356100	2224146	2227040	2895	-	1	10697	3.69499	conserved Plasmodium protein, unknown function
PF3D7_1356300	2231883	2233248	609	+	7	3333	5.47291	ubiquitin-conjugating enzyme E2, putative
PF3D7_1356800	2249587	2261721	12135	+	1	61662	5.08133	serine/threonine protein kinase, putative
PF3D7_1357000	2265817	2267148	1332	-	1	46620	35	elongation factor 1-alpha
PF3D7_1357100	2268901	2270232	1332	+	1	45900	34.4595	elongation factor 1-alpha
PF3D7_1357800	2291897	2294134	1590	+	3	3412	2.14591	T-complex protein 1 subunit delta
PF3D7_1358100	2305436	2307640	2205	-	1	5379	2.43946	Sas10 domain-containing protein, putative
PF3D7_1358400	2317002	2317844	420	+	3	967	2.30238	conserved Plasmodium protein, unknown function
PF3D7_1358700	2326394	2326855	462	-	1	7759	16.7944	YOP1-like protein, putative
PF3D7_1358800	2331074	2331529	456	+	1	7871	17.261	40S ribosomal protein S15
PF3D7_1359400	2359251	2361198	1530	-	2	5698	3.72418	CUGBP Elav-like family member 1
PF3D7_1359600	2371882	2377959	6078	+	1	21300	3.50444	conserved Plasmodium protein, unknown function
PF3D7_1359900	2395974	2402354	6381	+	1	14434	2.26203	conserved Plasmodium membrane protein, unknown function
PF3D7_1360200	2406838	2408385	774	-	7	1672	2.16021	ER membrane protein complex subunit 3, putative
PF3D7_1360800	2435343	2438924	3582	+	1	12873	3.5938	falcilysin
PF3D7_1360900	2440438	2442909	1170	-	9	3367	2.87778	RNA-binding protein, putative
PF3D7_1361100	2450461	2453760	2823	+	5	8406	2.97768	protein transport protein Sec24A
PF3D7_1361400	2464135	2464718	432	-	2	1021	2.36343	actin-depolymerizing factor 2
PF3D7_1361500.1	2465491	2467982	1101	-	12	2336	2.12171	conserved Plasmodium protein, unknown function
PF3D7_1361600	2469127	2469540	414	-	1	921	2.22464	Fe-S assembly protein IscX, putative
PF3D7_1361700	2470972	2471793	687	+	2	1424	2.07278	cytochrome c oxidase subunit 2, putative
PF3D7_1361800	2473530	2481626	7818	+	2	29712	3.80046	glideosome-associated connector
PF3D7_1361900	2482472	2483296	825	-	1	5549	6.72606	proliferating cell nuclear antigen 1
PF3D7_1363900	2562118	2562968	851	+	1	10878	12.7826	unspecified product
PF3D7_1364100	2568556	2570946	2391	+	1	7576	3.16855	6-cysteine protein
PF3D7_1365600	2621261	2624000	1686	+	8	3541	2.10024	DNA topoisomerase VI, b subunit, putative
PF3D7_1365700	2624553	2626098	1227	-	3	4174	3.40179	SNARE associated Golgi protein, putative
PF3D7_1365800	2629861	2631442	990	+	4	2732	2.7596	conserved Plasmodium protein, unknown function
PF3D7_1365900	2632534	2633260	387	-	2	7750	20.0258	ubiquitin-60S ribosomal protein L40
PF3D7_1366000	2635213	2635488	276	+	1	838	3.03623	conserved Plasmodium protein, unknown function
PF3D7_1366200	2638091	2638543	453	+	1	1031	2.27594	conserved Plasmodium protein, unknown function
PF3D7_1366400	2655277	2659065	3789	-	1	8422	2.22275	rhoptry protein RHOP148
PF3D7_1366500	2661573	2662022	450	+	1	1109	2.46444	nucleoside diphosphate kinase
PF3D7_1366600	2663422	2665152	1731	-	1	6905	3.98902	signal recognition particle receptor subunit alpha, putative
PF3D7_1366800	2668398	2670524	1074	-	9	3418	3.1825	phosphatidylserine synthase, putative
PF3D7_1366900	2675590	2677966	2058	+	3	15027	7.30175	conserved Plasmodium protein, unknown function
PF3D7_1367000	2679415	2680425	489	-	5	1079	2.20654	suppressor of kinetochore protein 1, putative
PF3D7_1368100	2710406	2711718	936	-	3	2167	2.31517	26S proteasome regulatory subunit RPN11, putative
PF3D7_1368300	2717853	2719377	693	+	6	2854	4.11833	conserved Plasmodium protein, unknown function
PF3D7_1368400	2719490	2721420	963	-	6	3136	3.25649	conserved Plasmodium protein, unknown function
PF3D7_1368600	2725669	2725947	279	-	1	623	2.23297	mitochondrial import inner membrane translocase subunit TIM9, putative
PF3D7_1370300	2787972	2788913	750	+	2	5138	6.85067	membrane associated histidine-rich protein
PF3D7_1370500	2794237	2794851	615	+	1	39126	63.6195	unspecified product
PF3D7_1370800	2796119	2797144	1026	+	1	286524	279.263	unspecified product
PF3D7_1370900	2797507	2798103	597	+	1	155217	259.995	unspecified product
PF3D7_1371300	2802945	2807159	4215	+	1	126938	30.1158	28S ribosomal RNA
PF3D7_1372200	2840727	2841703	828	-	2	14766	17.8333	histidine-rich protein III
PF3D7_1401100	41289	43093	1479	-	2	8818	5.96214	DnaJ protein, putative
PF3D7_1401200	46833	47744	795	+	2	1660	2.08805	Plasmodium exported protein, unknown function
PF3D7_1401400	53411	53734	324	-	1	15315	47.2685	early transcribed membrane protein 14.1
PF3D7_1401600	61364	62988	1437	-	2	11737	8.16771	Plasmodium exported protein (PHISTb), unknown function
PF3D7_1401800	71368	72690	1323	+	1	6368	4.8133	choline kinase
PF3D7_1402200	84735	85301	567	+	1	4559	8.04056	conserved Plasmodium protein, unknown function
PF3D7_1402300	85883	87883	2001	-	1	6593	3.29485	26S proteasome regulatory subunit RPN6
PF3D7_1402500	92264	93537	450	-	3	8917	19.8156	ribosomal protein S27a, putative
PF3D7_1402800	100847	105624	4536	+	3	12909	2.8459	conserved Plasmodium protein, unknown function
PF3D7_1403500	130022	132100	813	-	9	2339	2.877	dynein light chain, putative
PF3D7_1403600	132554	133245	351	+	3	2673	7.61538	selenoprotein
PF3D7_1404100	145134	145649	348	-	2	847	2.43391	cytochrome c, putative
PF3D7_1404700	161227	162099	873	-	1	4620	5.2921	conserved Plasmodium protein, unknown function
PF3D7_1404800	163990	166854	2865	-	1	19270	6.726	conserved Plasmodium protein, unknown function
PF3D7_1404900	170000	170893	894	+	1	22671	25.3591	conserved Plasmodium protein, unknown function
PF3D7_1405600	193216	194265	1050	-	1	4421	4.21048	ribonucleoside-diphosphate reductase small chain, putative
PF3D7_1405700	196327	198486	2160	-	1	8536	3.95185	RING zinc finger protein, putative
PF3D7_1406200	217845	226307	8463	+	1	20671	2.44251	conserved Plasmodium protein, unknown function
PF3D7_1406300	228410	229837	1428	+	1	3103	2.17297	glycerophosphodiester phosphodiesterase
PF3D7_1406600	239747	243772	4026	+	1	9715	2.41307	ATP-dependent Clp protease regulatory subunit ClpC, putative
PF3D7_1406800	246380	247721	855	-	3	21042	24.6105	glideosome associated protein with multiple membrane spans 3
PF3D7_1407100	258746	259988	957	+	2	1952	2.03971	rRNA 2'-O-methyltransferase fibrillarin, putative
PF3D7_1407400	268108	268692	585	-	1	1201	2.05299	conserved Plasmodium protein, unknown function
PF3D7_1407800	283086	284435	1350	+	1	18717	13.8644	plasmepsin IV
PF3D7_1408000	293471	294832	1362	+	1	6232	4.57562	plasmepsin II
PF3D7_1408100	297468	298823	1356	+	1	7309	5.39012	plasmepsin III
PF3D7_1408500	320274	320861	588	+	1	1401	2.38265	conserved Plasmodium protein, unknown function
PF3D7_1408600	323317	324172	657	+	2	10178	15.4916	40S ribosomal protein S8e, putative
PF3D7_1409200.1	360656	361539	597	-	3	1505	2.52094	conserved Plasmodium protein, unknown function
PF3D7_1409200.2	360656	361539	561	-	3	1455	2.59358	conserved Plasmodium protein, unknown function
PF3D7_1409300	363092	364240	1149	+	1	6063	5.27676	DNA damage-inducible protein 1, putative
PF3D7_1409400	365509	367027	789	-	4	9077	11.5044	conserved Plasmodium membrane protein, unknown function
PF3D7_1409900	389592	391595	2004	+	1	6055	3.02146	cytidine diphosphate-diacylglycerol synthase
PF3D7_1410400	420442	422790	2349	+	1	61467	26.1673	rhoptry-associated protein 1
PF3D7_1410500	423751	424250	402	-	2	1418	3.52736	conserved Plasmodium protein, unknown function
PF3D7_1410600	427191	428588	1398	+	1	8275	5.91917	eukaryotic translation initiation factor 2 subunit gamma, putative
PF3D7_1410700	429690	430861	1005	-	2	4856	4.83184	conserved Plasmodium protein, unknown function
PF3D7_1410800	433951	435318	519	+	7	1441	2.77649	ankyrin-repeat protein, putative
PF3D7_1410900	437224	439466	1917	+	4	4792	2.49974	ribosome maturation protein SBDS, putative
PF3D7_1411000.1	440541	447773	6165	+	10	66566	10.7974	conserved Plasmodium protein, unknown function
PF3D7_1411000.2	440541	447773	6096	+	9	66302	10.8763	conserved Plasmodium protein, unknown function
PF3D7_1411100.1	447923	449968	1122	-	8	21478	19.1426	conserved Plasmodium membrane protein, unknown function, unspecified product
PF3D7_1411100.2	447990	449968	1017	-	8	19231	18.9095	conserved Plasmodium membrane protein, unknown function, unspecified product
PF3D7_1411200	452175	454879	2217	-	4	16022	7.22688	rhomboid protease ROM8
PF3D7_1412300	491494	492221	378	-	3	4454	11.7831	nuclear transport factor 2, putative
PF3D7_1412800	516574	518193	1233	-	4	3146	2.5515	glycylpeptide N-tetradecanoyltransferase
PF3D7_1412900.2	521209	522242	276	+	5	589	2.13406	ubiquitin-conjugating enzyme E2, putative
PF3D7_1413400	534057	535988	1932	-	1	4064	2.10352	30S ribosomal protein S9, putative
PF3D7_1413700	540677	546046	3642	-	12	10699	2.93767	conserved Plasmodium protein, unknown function
PF3D7_1414200	564024	565247	1224	-	1	8578	7.00817	conserved Plasmodium protein, unknown function
PF3D7_1414300	570802	571461	660	+	1	11396	17.2667	60S ribosomal protein L10, putative
PF3D7_1414400	575496	577055	915	+	5	10008	10.9377	serine/threonine protein phosphatase PP1
PF3D7_1414500	578369	587529	8277	-	6	32144	3.88353	atypical protein kinase, ABC-1 family, putative
PF3D7_1416500	667412	668824	1413	+	1	3682	2.6058	NADP-specific glutamate dehydrogenase
PF3D7_1417200	694585	708177	13401	+	2	31482	2.34923	NOT family protein, putative
PF3D7_1417600	730694	744682	13989	-	1	29057	2.07713	conserved Plasmodium protein, unknown function
PF3D7_1417700	750330	751684	696	+	6	2076	2.98276	conserved Plasmodium protein, unknown function
PF3D7_1418500	779377	779495	119	+	1	570	4.78992	5S ribosomal RNA
PF3D7_1418600	780006	780124	119	+	1	557	4.68067	5S ribosomal RNA
PF3D7_1418700	780916	781034	119	+	1	572	4.80672	5S ribosomal RNA
PF3D7_1418800	782049	782361	313	-	1	802	2.5623	signal recognition particle RNA
PF3D7_1419000	786958	790458	3501	-	1	8910	2.54499	conserved Plasmodium protein, unknown function
PF3D7_1419700	820068	821597	1530	+	1	8584	5.61046	conserved Plasmodium protein, unknown function
PF3D7_1420200	838927	842664	3738	-	1	7808	2.08882	myosin-specific chaperone UNC, putative
PF3D7_1420700	860011	863080	2910	+	2	64256	22.0811	surface protein P113
PF3D7_1421150	875173	875321	149	-	1	48787	327.43	C/D small nucleolar RNA
PF3D7_1421200	875687	876385	318	-	3	6027	18.9528	40S ribosomal protein S25
PF3D7_1421900	891140	891622	483	-	1	4781	9.89855	copper transporter, putative
PF3D7_1422000	891991	893049	282	-	3	1528	5.41844	cytochrome c oxidase assembly protein COX14, putative
PF3D7_1422100	893720	894862	1143	-	1	2355	2.06037	mitochondrial ribosomal protein L21 precursor, putative
PF3D7_1422200	896004	896939	936	-	1	2525	2.69765	conserved Plasmodium protein, unknown function
PF3D7_1423000	924964	926427	1464	-	1	3141	2.14549	nucleolar GTP-binding protein 2, putative
PF3D7_1423300	936168	941638	2880	+	16	9365	3.25174	serine/threonine protein phosphatase 7
PF3D7_1423700	959074	963750	4677	-	1	18116	3.87342	conserved Plasmodium protein, unknown function
PF3D7_1423900	972775	972860	86	-	1	745	8.66279	small nucleolar RNA snoR23
PF3D7_1424000	973147	973225	79	-	1	679	8.59494	small nucleolar RNA snoR24
PF3D7_1424100	973853	975543	885	-	3	10477	11.8384	60S ribosomal protein L5, putative
PF3D7_1424400	977908	979166	852	+	3	12533	14.7101	60S ribosomal protein L7-3, putative
PF3D7_1424500	979464	979605	142	+	1	516	3.6338	small nucleolar RNA snoR27
PF3D7_1424600	979767	979836	70	+	1	317	4.52857	small nucleolar RNA snoR28
PF3D7_1424700	981588	981671	84	+	1	17735	211.131	small nucleolar RNA snoR29
PF3D7_1424800	981881	981998	118	+	1	1382	11.7119	unspecified product
PF3D7_1424900	982154	982228	75	+	1	14072	187.627	small nucleolar RNA snoR30
PF3D7_1425000	982349	982520	172	+	1	760	4.4186	Plasmodium RNA of unknown function RUF4
PF3D7_1425100	982892	983018	127	+	1	3587	28.2441	small nucleolar RNA snoR31
PF3D7_1425300	985365	987755	924	-	7	5111	5.53139	conserved Plasmodium protein, unknown function
PF3D7_1426000	1016133	1016618	486	-	1	7048	14.5021	60S ribosomal protein L21
PF3D7_1426100	1018745	1019260	516	-	1	3638	7.05039	transcription factor BTF3, putative
PF3D7_1426200	1021652	1022857	1206	-	1	3832	3.17745	protein arginine N-methyltransferase 1
PF3D7_1426700	1036137	1039583	3447	-	1	8350	2.4224	phosphoenolpyruvate carboxylase
PF3D7_1426900	1050050	1050316	267	-	1	1355	5.07491	cytochrome b-c1 complex subunit 6, putative
PF3D7_1427100	1056162	1060124	3963	+	1	9712	2.45067	lipase, putative
PF3D7_1427200	1061805	1062392	405	+	2	890	2.19753	selenoprotein
PF3D7_1427900	1092936	1093781	846	+	1	7465	8.82388	leucine-rich repeat protein
PF3D7_1428000	1095686	1097731	1245	+	7	2717	2.18233	conserved Plasmodium membrane protein, unknown function
PF3D7_1428200	1101958	1104387	2430	+	1	12353	5.08354	major facilitator superfamily domain-containing protein, putative
PF3D7_1428300	1105200	1106514	1134	-	2	3834	3.38095	proliferation-associated protein 2g4, putative
PF3D7_1428800.1	1133067	1134400	1104	+	3	2345	2.12409	transcription initiation TFIID-like, putative
PF3D7_1428800.2	1133067	1134400	1107	+	3	2346	2.11924	transcription initiation TFIID-like, putative
PF3D7_1429100	1142154	1143791	1638	+	1	3953	2.41331	apicoplast ribosomal protein L15 precursor, putative
PF3D7_1429700	1168236	1169336	1101	-	1	2529	2.297	mitochondrial ribosomal protein L15 precursor, putative
PF3D7_1429800	1170829	1175293	4113	+	3	9539	2.31923	coatomer subunit beta, putative
PF3D7_1430000	1181664	1182982	990	-	3	2028	2.04848	conserved Plasmodium protein, unknown function
PF3D7_1430200	1188349	1191466	1884	+	8	6778	3.59766	plasmepsin IX
PF3D7_1430900	1216653	1217171	519	-	1	1180	2.2736	cytochrome c oxidase subunit 2, putative
PF3D7_1431300	1231036	1233841	2502	+	2	7144	2.85532	large subunit GTPase 1, putative
PF3D7_1431400	1233977	1237125	2973	-	2	15324	5.15439	conserved Plasmodium protein, unknown function
PF3D7_1431700	1247030	1247950	498	+	3	6251	12.5522	60S ribosomal protein L14, putative
PF3D7_1432000	1257643	1258971	1329	-	1	3208	2.41384	syntaxin, Qa-SNARE family
PF3D7_1432100	1260908	1262826	870	+	7	2232	2.56552	voltage-dependent anion-selective channel protein, putative
PF3D7_1432700	1290468	1291459	675	-	3	1490	2.20741	protein-L-isoaspartate(D-aspartate) O-methyltransferase, putative
PF3D7_1433000	1298639	1298977	168	-	2	431	2.56548	H/ACA ribonucleoprotein complex subunit 3, putative
PF3D7_1433400	1312304	1329577	17274	-	1	84394	4.88561	zinc finger protein, putative
PF3D7_1433500	1332363	1337301	4419	-	4	23139	5.23625	DNA topoisomerase 2
PF3D7_1433600	1341689	1342289	306	+	3	1422	4.64706	signal peptidase complex subunit SPC1, putative
PF3D7_1434200	1368815	1369796	450	-	2	3994	8.87556	calmodulin
PF3D7_1434300	1372903	1374597	1695	+	1	4973	2.93392	Hsp70/Hsp90 organizing protein
PF3D7_1434400	1375624	1376830	858	-	4	4166	4.85548	conserved Plasmodium membrane protein, unknown function
PF3D7_1435200	1419383	1420934	1080	+	4	4123	3.81759	conserved Plasmodium protein, unknown function
PF3D7_1435400	1433738	1434310	573	-	1	1301	2.27051	ER membrane protein complex subunit 4, putative
PF3D7_1435500	1436280	1437044	765	+	1	3149	4.11634	clathrin light chain, putative
PF3D7_1435600	1437511	1442877	5367	-	1	28744	5.35569	conserved Plasmodium protein, unknown function
PF3D7_1436200	1467629	1474438	6810	-	1	26807	3.93642	conserved Plasmodium protein, unknown function
PF3D7_1436300	1479777	1482758	2982	+	1	34157	11.4544	translocon component PTEX150
PF3D7_1437000	1502648	1504861	1635	+	3	6308	3.8581	N-acetyltransferase, putative
PF3D7_1437200	1507359	1510089	2544	-	2	12805	5.03341	ribonucleoside-diphosphate reductase large subunit, putative
PF3D7_1437300	1513938	1514961	639	-	4	3188	4.98905	conserved Plasmodium protein, unknown function
PF3D7_1437900	1533329	1534947	1275	+	2	6984	5.47765	HSP40, subfamily A
PF3D7_1438000	1536484	1538469	1986	-	1	8444	4.25176	eukaryotic translation initiation factor eIF2A, putative
PF3D7_1438100	1541359	1542872	1134	-	3	4657	4.1067	secretory complex protein 62
PF3D7_1438400	1548918	1556721	6063	+	7	17318	2.85634	metacaspase-like protein
PF3D7_1438900	1575984	1576571	588	+	1	2288	3.89116	thioredoxin peroxidase 1
PF3D7_1439000	1578193	1579175	708	+	2	4170	5.88983	copper transporter
PF3D7_1439300	1594505	1600061	5412	+	2	17009	3.14283	Sad1/UNC domain-containing protein, putative
PF3D7_1439600	1612521	1613063	543	-	1	1665	3.0663	conserved Plasmodium protein, unknown function
PF3D7_1439800	1618819	1619794	726	+	2	4008	5.52066	vesicle-associated membrane protein, putative
PF3D7_1439900	1622576	1623612	747	+	2	3336	4.46586	triosephosphate isomerase
PF3D7_1440100	1633211	1636255	3045	-	1	6894	2.26404	conserved Plasmodium protein, unknown function
PF3D7_1440900	1668591	1669963	705	+	6	1703	2.4156	conserved Plasmodium protein, unknown function
PF3D7_1441100	1673386	1674069	684	-	1	7311	10.6886	conserved Plasmodium protein, unknown function
PF3D7_1441200	1678662	1679486	654	+	2	1604	2.4526	60S ribosomal protein L1, putative
PF3D7_1441500	1693137	1695192	1458	-	4	3306	2.26749	conserved Plasmodium protein, unknown function
PF3D7_1442300	1712626	1714065	1209	-	2	3077	2.54508	tRNA import protein tRIP
PF3D7_1442400	1717171	1723512	6342	+	1	14602	2.30243	conserved Plasmodium protein, unknown function
PF3D7_1442900	1753510	1763664	10155	+	1	21027	2.07061	protein transport protein SEC7, putative
PF3D7_1443100	1769626	1771350	1725	-	1	4593	2.66261	conserved Plasmodium protein, unknown function
PF3D7_1443300	1776010	1776662	306	+	3	783	2.55882	U6 snRNA-associated Sm-like protein LSm5, putative
PF3D7_1443700	1791911	1793004	825	-	2	2170	2.6303	dephospho-CoA kinase, putative
PF3D7_1444300	1828579	1829962	879	+	3	4703	5.3504	1-acyl-sn-glycerol-3-phosphate acyltransferase, putative
PF3D7_1444700	1841960	1842906	561	+	4	1178	2.09982	shikimate dehydrogenase, putative
PF3D7_1444800	1844041	1845617	1110	-	2	33868	30.5117	fructose-bisphosphate aldolase
PF3D7_1444900	1848315	1848833	519	+	1	1617	3.11561	conserved Plasmodium protein, unknown function
PF3D7_1445400	1862775	1865420	2646	-	1	9819	3.71088	protein serine/threonine kinase-1
PF3D7_1445500	1867616	1868065	450	+	1	1471	3.26889	conserved Plasmodium protein, unknown function
PF3D7_1445600	1871778	1874381	1791	+	5	6487	3.622	RNA-binding protein, putative
PF3D7_1445700	1875421	1876874	1056	-	3	4217	3.99337	conserved Plasmodium protein, unknown function
PF3D7_1445900	1885443	1888323	1584	+	2	6080	3.83838	ATP-dependent RNA helicase DDX5, putative
PF3D7_1446000	1889413	1889529	117	+	1	2069	17.6838	U5 spliceosomal RNA
PF3D7_1446200	1893200	1895017	1818	-	1	4111	2.26128	M17 leucyl aminopeptidase
PF3D7_1446300	1898351	1901926	3576	+	1	10626	2.97148	conserved Plasmodium membrane protein, unknown function
PF3D7_1446600	1917232	1918010	507	-	3	4816	9.49901	centrin-2
PF3D7_1446700	1919583	1921645	1074	-	8	2389	2.22439	conserved Plasmodium protein, unknown function
PF3D7_1446900	1924425	1926650	1152	-	3	2418	2.09896	glutaminyl-peptide cyclotransferase, putative
PF3D7_1447000	1929931	1931379	819	+	4	9504	11.6044	40S ribosomal protein S5
PF3D7_1447100	1932421	1933200	435	-	3	876	2.01379	conserved Plasmodium protein, unknown function
PF3D7_1447200	1933985	1935775	1590	+	2	4169	2.62201	conserved Plasmodium protein, unknown function
PF3D7_1447700	1943936	1944964	1029	-	1	3028	2.94266	conserved Plasmodium protein, unknown function
PF3D7_1448300	1972498	1977423	4926	-	1	11021	2.23731	conserved Plasmodium protein, unknown function
PF3D7_1448500	1984189	1995574	11115	-	3	31251	2.81161	conserved Plasmodium protein, unknown function
PF3D7_1449100	2008431	2012494	3090	+	7	6975	2.25728	conserved Plasmodium protein, unknown function
PF3D7_1449200	2014670	2015055	258	+	2	16233	62.9186	conserved Plasmodium protein, unknown function
PF3D7_1450100	2051621	2053123	1503	-	1	4361	2.90153	signal recognition particle subunit SRP54
PF3D7_1450700	2078488	2080350	1863	+	1	3861	2.07246	conserved Plasmodium protein, unknown function
PF3D7_1451100	2090902	2093400	2499	+	1	21026	8.41377	elongation factor 2
PF3D7_1451200	2094340	2099736	4515	-	2	38498	8.52669	conserved Plasmodium protein, unknown function
PF3D7_1451700	2118947	2120280	534	-	6	1656	3.10112	calcineurin subunit B
PF3D7_1451800	2123461	2126599	2688	+	4	5536	2.05952	sortilin
PF3D7_1452000	2134298	2140867	6570	+	1	32803	4.99285	rhoptry neck protein 2
PF3D7_1452500	2151823	2153614	636	-	8	1316	2.06918	SNARE protein, putative
PF3D7_1453700	2207027	2208320	828	+	2	6957	8.40217	co-chaperone p23
PF3D7_1454400	2234143	2236476	2334	+	1	6532	2.79863	aminopeptidase P
PF3D7_1454500	2238394	2238882	489	+	1	1399	2.86094	iron sulfur cluster assembly protein, putative
PF3D7_1455100	2251188	2251934	516	-	3	3031	5.87403	protein tyrosine phosphatase, putative
PF3D7_1455300	2259465	2261297	1833	+	1	6146	3.35297	conserved Plasmodium protein, unknown function
PF3D7_1455400	2262739	2263801	849	-	2	4024	4.73969	hemolysin III
PF3D7_1456800	2329933	2332086	2154	-	1	8425	3.91133	V-type H(+)-translocating pyrophosphatase, putative
PF3D7_1457000	2336649	2339153	1239	-	9	11689	9.43422	signal peptide peptidase
PF3D7_1457200	2343640	2344218	315	-	2	3953	12.5492	thioredoxin 1
PF3D7_1457300	2346178	2348097	1920	-	1	4758	2.47812	conserved Plasmodium protein, unknown function
PF3D7_1457900	2375579	2385946	10368	+	1	21412	2.0652	conserved Plasmodium protein, unknown function
PF3D7_1458000	2387786	2389495	1710	+	1	5127	2.99825	cysteine proteinase falcipain 1
PF3D7_1458100	2390726	2390902	177	+	1	650	3.67232	protein PET117, putative
PF3D7_1458200	2391118	2391601	333	+	2	2045	6.14114	conserved Plasmodium protein, unknown function
PF3D7_1459000	2420764	2422989	2226	+	1	4684	2.10422	ATP-dependent RNA helicase DBP5
PF3D7_1459300	2432177	2432746	570	+	1	1179	2.06842	OPA3-like protein, putative
PF3D7_1459400	2433361	2434383	1023	-	1	2375	2.3216	conserved Plasmodium protein, unknown function
PF3D7_1459600	2441345	2443896	2406	+	2	5432	2.25769	conserved Plasmodium protein, unknown function
PF3D7_1459800	2446983	2448298	732	-	4	4442	6.06831	bax inhibitor 1, putative
PF3D7_1460300	2459214	2459964	204	-	3	3060	15	60S ribosomal protein L29, putative
PF3D7_1460600	2473758	2474204	447	+	1	3195	7.14765	inner membrane complex sub-compartment protein 3
PF3D7_1460700	2475501	2476473	441	-	4	5056	11.4649	60S ribosomal protein L27
PF3D7_1461300	2492166	2492369	204	+	1	2196	10.7647	40S ribosomal protein S28e, putative
PF3D7_1461400	2493400	2494762	969	-	4	2601	2.68421	conserved Plasmodium protein, unknown function
PF3D7_1462300	2524921	2528994	4074	-	1	10228	2.51055	GTP-binding protein, putative
PF3D7_1462800	2559098	2560347	1014	+	2	58274	57.4694	glyceraldehyde-3-phosphate dehydrogenase
PF3D7_1463000	2565357	2566283	927	-	1	3042	3.28155	conserved Plasmodium protein, unknown function
PF3D7_1463700	2581543	2582523	981	+	1	2248	2.29154	cyclin 1
PF3D7_1463900	2584575	2589782	3216	-	15	22138	6.88371	EF-hand calcium-binding domain-containing protein, putative
PF3D7_1464400	2604381	2605411	315	-	5	645	2.04762	zinc finger protein, putative
PF3D7_1464500	2607292	2617621	9756	+	5	21233	2.1764	conserved Plasmodium membrane protein, unknown function
PF3D7_1464600	2619679	2624187	4329	+	2	30262	6.99053	serine/threonine protein phosphatase UIS2, putative
PF3D7_1465000	2635841	2636677	837	+	1	2823	3.37276	conserved Plasmodium protein, unknown function
PF3D7_1465400	2646603	2647033	273	-	2	1095	4.01099	conserved Plasmodium protein, unknown function
PF3D7_1465900	2684141	2685534	666	+	3	8080	12.1321	40S ribosomal protein S3
PF3D7_1466300	2709418	2713192	3519	+	3	11540	3.27934	26S proteasome regulatory subunit RPN2, putative
PF3D7_1466400	2714844	2717285	2442	-	1	5857	2.39844	AP2 domain transcription factor AP2-SP
PF3D7_1467800	2767400	2767935	273	+	3	633	2.31868	conserved Plasmodium protein, unknown function
PF3D7_1467900	2771101	2776308	4971	+	3	28229	5.67874	rab GTPase activator, putative
PF3D7_1468100	2786308	2794323	7677	-	2	40082	5.22105	conserved Plasmodium protein, unknown function
PF3D7_1468200	2802508	2803188	681	+	1	1770	2.59912	conserved protein, unknown function
PF3D7_1468400	2809478	2812066	2589	+	1	8185	3.16145	zinc finger protein, putative
PF3D7_1468500	2812941	2814385	645	-	6	2268	3.51628	derlin-1
PF3D7_1468700	2825370	2826918	1197	+	4	17736	14.817	eukaryotic initiation factor 4A
PF3D7_1469200	2838913	2839989	1077	-	1	4600	4.27112	shewanella-like protein phosphatase 1, putative
PF3D7_1469800	2865024	2866245	648	-	3	2717	4.1929	conserved Plasmodium protein, unknown function
PF3D7_1470300	2879458	2879904	447	+	1	929	2.0783	conserved Plasmodium protein, unknown function
PF3D7_1470400	2880157	2881012	390	-	4	1302	3.33846	mitochondrial pyruvate carrier protein 2, putative
PF3D7_1470900	2897916	2898657	588	+	2	3356	5.70748	proteasome subunit beta type-2, putative
PF3D7_1471100	2905163	2906565	864	-	3	14757	17.0799	exported protein 2
PF3D7_1471200	2912386	2915354	1995	+	6	5037	2.52481	inorganic anion exchanger, inorganic anion antiporter
PF3D7_1471300	2915747	2918006	1746	-	5	4096	2.34593	conserved Plasmodium protein, unknown function
PF3D7_1471400	2919190	2920871	1500	-	2	3237	2.158	diacylglycerol kinase, putative
PF3D7_1472100	2941600	2943259	945	-	6	2333	2.46878	protein transport protein YIP1, putative
PF3D7_1472200	2945662	2952551	6756	+	2	18515	2.74053	histone deacetylase, putative
PF3D7_1472300	2954108	2957108	1608	+	9	5406	3.36194	conserved Plasmodium membrane protein, unknown function
PF3D7_1472600	2962986	2965086	1662	-	4	4463	2.68532	protein disulfide-isomerase
PF3D7_1472800	2969912	2971792	1092	-	7	2849	2.60897	conserved Plasmodium protein, unknown function
PF3D7_1473200	2981600	2982964	1365	+	1	3742	2.74139	DnaJ protein, putative
PF3D7_1474100	3023228	3023726	366	+	2	770	2.10383	mitochondrial ribosomal protein L20 precursor, putative
PF3D7_1474500	3055715	3057820	2106	-	1	5378	2.55366	splicing factor 3A subunit 1, putative
PF3D7_1474600	3060864	3062634	1185	+	5	3360	2.83544	conserved Plasmodium membrane protein, unknown function
PF3D7_1474800	3067562	3068692	765	+	3	3724	4.86797	proteasome subunit alpha type-1, putative
PF3D7_1475600	3112509	3114698	2190	-	1	5333	2.43516	bromodomain protein, putative
PF3D7_1476300	3139140	3140982	1719	+	2	12375	7.19895	Plasmodium exported protein (PHISTb), unknown function
PF3D7_1478000	3213581	3214617	849	+	2	2341	2.75736	Plasmodium exported protein (PHISTa), unknown function
PF3D7_1478900	3247032	3251019	3988	+	1	60497	15.1698	unspecified product
PFC10_API0026:tRNA	19149	19220	72	+	1	162	2.25	apicoplast ribosomal protein S11
PFC10_API0028	19444	20676	1233	-	1	3574	2.89862	apicoplast ribosomal protein S7
PFC10_API0029	20722	21150	429	-	1	1109	2.58508	elongation factor Tu
PFC10_API0030	21166	21534	369	-	1	2929	7.93767	probable protein, unknown function
PFC10_API0031	21943	22053	111	-	1	826	7.44144	tRNA Phenylalanine
PFC10_API0032	22019	22294	276	-	1	832	3.01449	tRNA Glutamine
PFC10_API0059	21548	21946	399	-	1	1639	4.10777	small subunit ribosomal RNA

## Sheet: trophozoite stage in vivo-26
Gene	start	end	Length	strand	num_exons	Reads	Load	Description
mal_mito_1	734	1486	753	-	1	29412	39.0598	cytochrome c oxidase subunit 3
mal_mito_2	2035	3471	1437	+	1	53735	37.3939	cytochrome c oxidase subunit 1
mal_mito_3	3492	4622	1131	+	1	58231	51.4863	cytochrome b
mal_mito_RNA19:rRNA	5547	5576	30	-	1	1956	65.2	unspecified product
mal_rna_10:rRNA	1830	1910	81	+	1	29172	360.148	unspecified product
mal_rna_11:rRNA	1916	2023	108	-	1	147956	1369.96	unspecified product
mal_rna_12:rRNA	4594	4618	25	-	1	128	5.12	unspecified product
mal_rna_13:rRNA	4996	5025	30	-	1	2987	99.5667	unspecified product
mal_rna_14:rRNA	5026	5201	176	-	1	243157	1381.57	unspecified product
mal_rna_15:rRNA	5379	5446	68	-	1	80924	1190.06	unspecified product
mal_rna_17:rRNA	5577	5771	195	-	1	248247	1273.06	unspecified product
mal_rna_18:rRNA	5772	5854	83	-	1	65863	793.53	unspecified product
mal_rna_19:rRNA	5855	5955	101	-	1	150114	1486.28	unspecified product
mal_rna_8:rRNA	1650	1688	39	+	1	3312	84.9231	unspecified product
mal_rna_9:rRNA	1697	1763	67	+	1	48538	724.448	unspecified product
malmito_rna_1:rRNA	506	593	88	-	1	114187	1297.58	unspecified product
malmito_rna_10:rRNA	625	724	100	-	1	147761	1477.61	unspecified product
malmito_rna_15:rRNA	594	624	31	-	1	1924	62.0645	unspecified product
malmito_rna_16:rRNA	3	33	31	+	1	1100	35.4839	unspecified product
malmito_rna_17:rRNA	126	165	40	+	1	11163	279.075	unspecified product
malmito_rna_20:rRNA	34	71	38	+	1	12850	338.158	unspecified product
malmito_rna_21:rRNA	1794	1829	36	+	1	17349	481.917	unspecified product
malmito_rna_9:rRNA	72	125	54	+	1	16273	301.352	unspecified product
malmito_rna_LSUC:rRNA	204	226	23	-	1	6022	261.826	unspecified product
malmito_rna_LSUF:rRNA	1516	1630	115	+	1	97499	847.817	unspecified product
malmito_rna_LSUG:rRNA	283	389	107	-	1	173652	1622.92	unspecified product
malmito_rna_RNA11:rRNA	5284	5340	57	-	1	32260	565.965	unspecified product
malmito_rna_RNA12:rRNA	4887	4945	59	+	1	34125	578.39	unspecified product
malmito_rna_RNA14:rRNA	5508	5548	41	-	1	19378	472.634	unspecified product
malmito_rna_RNA18:rRNA	4964	4988	25	+	1	231	9.24	unspecified product
malmito_rna_RNA22:rRNA	5341	5378	38	-	1	8184	215.368	unspecified product
malmito_rna_RNA4:rRNA	4625	4696	72	+	1	10620	147.5	unspecified product
malmito_rna_RNA5:rRNA	4716	4802	87	+	1	80128	921.011	unspecified product
malmito_rna_RNA6:rRNA	4808	4865	58	+	1	19547	337.017	unspecified product
malmito_rna_RNA7:rRNA	5202	5283	82	-	1	161455	1968.96	unspecified product
malmito_rna_SSUF:rRNA	5447	5507	61	-	1	15132	248.066	unspecified product
malmito_SSUB:rRNA	390	505	116	-	1	78498	676.707	unspecified product
PF3D7_0101300	74563	75366	708	+	2	2769	3.91102	Pfmc-2TM Maurer's cleft two transmembrane protein
PF3D7_0102300	104704	105209	354	+	2	3258	9.20339	Plasmodium exported protein, unknown function
PF3D7_0103200	140662	142219	1305	-	2	7253	5.55785	nucleoside transporter 4
PF3D7_0103600	161131	166229	4605	+	3	10189	2.2126	ATP-dependent RNA helicase, putative
PF3D7_0103900	172864	174591	1728	+	1	4326	2.50347	parasite-infected erythrocyte surface protein
PF3D7_0104200	182822	184222	1401	-	1	4094	2.9222	StAR-related lipid transfer protein
PF3D7_0104300	190269	201230	10500	+	3	24570	2.34	ubiquitin carboxyl-terminal hydrolase 1, putative
PF3D7_0104400	202536	204143	1608	+	1	3636	2.26119	4-hydroxy-3-methylbut-2-enyl diphosphate reductase
PF3D7_0104500	204622	205455	834	-	1	2928	3.51079	conserved protein, unknown function
PF3D7_0104900	218517	218824	308	-	1	1261	4.09416	RNase MRP
PF3D7_0105000	218894	219223	330	-	1	709	2.14848	unspecified product
PF3D7_0105300	225110	225779	489	-	2	4166	8.51943	cyclase-associated protein
PF3D7_0105400.1	226681	227285	423	-	2	969	2.29078	conserved Plasmodium protein, unknown function
PF3D7_0105400.2	226681	227285	402	-	2	898	2.23383	conserved Plasmodium protein, unknown function
PF3D7_0105800	249231	252010	2499	-	2	8897	3.56022	conserved Plasmodium protein, unknown function
PF3D7_0105900	253584	254930	1347	+	1	3781	2.80698	3'-5' exonuclease, putative
PF3D7_0106000	255775	258543	2769	-	1	7207	2.60274	conserved Plasmodium protein, unknown function
PF3D7_0106100	260658	261809	1152	-	1	2394	2.07812	V-type proton ATPase subunit C, putative
PF3D7_0106300	265208	269173	3687	-	3	8742	2.37103	calcium-transporting ATPase
PF3D7_0106400	272454	273404	471	+	4	1185	2.51592	pre-rRNA-processing protein TSR2, putative
PF3D7_0106900	290386	292590	2205	+	1	10107	4.58367	2-C-methyl-D-erythritol 4-phosphate cytidylyltransferase, putative
PF3D7_0107000	293642	294968	507	+	6	1811	3.57199	centrin-1
PF3D7_0107500	304362	309257	4413	-	4	19707	4.46567	lipid/sterol:H+ symporter
PF3D7_0107800	322371	326072	3702	+	1	7767	2.09806	double-strand break repair protein MRE11
PF3D7_0107900	326397	327224	828	-	1	2120	2.56039	conserved Plasmodium protein, unknown function
PF3D7_0108000	328431	329558	657	-	4	3539	5.38661	proteasome subunit beta type-3, putative
PF3D7_0108300	337168	343833	6666	+	1	18478	2.77198	conserved Plasmodium protein, unknown function
PF3D7_0108600	349995	351626	921	-	6	2605	2.82845	conserved Plasmodium protein, unknown function
PF3D7_0108700	352314	356211	3459	-	4	11618	3.35877	secreted ookinete protein, putative
PF3D7_0108800	357834	360339	1083	+	11	2353	2.17267	conserved Plasmodium protein, unknown function
PF3D7_0108900	361987	362586	600	-	1	1545	2.575	unspecified product
PF3D7_0109400	374439	375087	501	-	2	1896	3.78443	tubulin-specific chaperone a, putative
PF3D7_0109500	376294	377004	468	-	2	1466	3.13248	N-acetyltransferase, putative
PF3D7_0109700	379149	379806	552	-	2	1340	2.42754	rRNA biogenesis protein RRP36, putative
PF3D7_0109900.1	383284	387940	2286	+	19	5076	2.22047	phosphatidate cytidylyltransferase, putative
PF3D7_0109900.2	383284	387625	2085	+	17	4541	2.17794	conserved Plasmodium protein, unknown function
PF3D7_0110000	388372	389076	705	+	1	1804	2.55887	conserved Plasmodium protein, unknown function
PF3D7_0110300	393216	393490	275	-	1	1094	3.97818	Plasmodium RNA of unknown function RUF5
PF3D7_0110400	393875	394835	750	-	2	3249	4.332	DNA-directed RNA polymerase II subunit RPB9, putative
PF3D7_0110500	396591	403606	6858	+	2	14934	2.1776	bromodomain protein, putative
PF3D7_0110600	405739	412169	5133	+	7	16882	3.28891	phosphatidylinositol-4-phosphate 5-kinase
PF3D7_0110700	413760	415100	1341	-	1	4852	3.6182	chromatin assembly factor 1 protein WD40 domain, putative
PF3D7_0111200	430152	430858	294	-	3	795	2.70408	conserved Plasmodium protein, unknown function
PF3D7_0111300	431539	435042	3504	-	1	9314	2.65811	P-loop containing nucleoside triphosphate hydrolase, putative
PF3D7_0111400	436408	438564	2157	+	1	6526	3.0255	conserved Plasmodium protein, unknown function
PF3D7_0111500	439652	441418	1116	-	5	3570	3.19892	UMP-CMP kinase, putative
PF3D7_0111600	442543	443289	747	-	1	1938	2.59438	conserved Plasmodium protein, unknown function
PF3D7_0111800	446026	448849	1863	+	8	4444	2.3854	eukaryotic translation initiation factor 4E, putative
PF3D7_0111900	450043	450646	246	-	3	2085	8.47561	conserved protein, unknown function
PF3D7_0112700	477279	481382	4104	+	1	26000	6.33528	28S ribosomal RNA
PF3D7_0113000	487892	490127	2022	-	2	22023	10.8917	glutamic acid-rich protein
PF3D7_0113200	500959	502868	1779	-	2	4043	2.27263	Plasmodium exported protein, unknown function
PF3D7_0202000	103385	105796	1965	-	2	22555	11.4784	knob-associated histidine-rich protein
PF3D7_0202500	127994	128314	321	+	1	1143	3.56075	early transcribed membrane protein 2
PF3D7_0203000	141625	147564	5940	-	1	18210	3.06566	repetitive organellar protein, putative
PF3D7_0203300	160514	161242	729	+	1	1580	2.16735	ERCC1 nucleotide excision repair protein, putative
PF3D7_0203400	162065	162900	276	-	4	680	2.46377	conserved Plasmodium protein, unknown function
PF3D7_0204100	182228	189115	6888	-	1	15147	2.19904	conserved Plasmodium protein, unknown function
PF3D7_0204200	192818	194199	831	+	5	5900	7.09988	conserved Plasmodium protein, unknown function
PF3D7_0204300	194826	196916	2091	-	1	5444	2.60354	conserved Plasmodium protein, unknown function
PF3D7_0204800	209583	210833	1251	-	1	2592	2.07194	3'-5' exonuclease, putative
PF3D7_0205500	225562	226245	399	-	3	798	2	DNA-directed RNA polymerase II 16 kDa subunit, putative
PF3D7_0205700.1	231141	232529	618	+	5	1675	2.71036	RNA-binding protein, putative
PF3D7_0205700.2	231141	232529	669	+	6	1783	2.66517	RNA-binding protein, putative
PF3D7_0205800	232729	233476	363	-	3	1451	3.99725	PH domain-containing protein, putative
PF3D7_0205900	235237	238816	2901	+	4	9923	3.42054	26S proteasome regulatory subunit RPN1, putative
PF3D7_0206100	245358	246699	750	+	4	1675	2.23333	cysteine desulfuration protein SufE
PF3D7_0206700	271594	273009	1416	+	1	3154	2.2274	adenylosuccinate lyase
PF3D7_0206800	273689	274507	819	-	1	11127	13.5861	merozoite surface protein 2
PF3D7_0207000	277494	278456	819	-	2	10525	12.851	merozoite surface protein 4
PF3D7_0207100	281907	287345	5238	+	3	11318	2.16075	conserved Plasmodium protein, unknown function
PF3D7_0207400	294273	297616	2841	-	4	10651	3.74903	serine repeat antigen 7
PF3D7_0207500	298897	302564	3096	-	4	11719	3.78521	serine repeat antigen 6
PF3D7_0207600	303593	307027	2994	-	4	58724	19.6139	serine repeat antigen 5
PF3D7_0208100.1	327932	335203	5370	+	16	17902	3.33371	conserved Plasmodium protein, unknown function
PF3D7_0208100.2	327932	335203	5370	+	16	17902	3.33371	conserved Plasmodium protein, unknown function
PF3D7_0208200	335679	336581	903	-	1	3184	3.52602	KRR1 small subunit processome component, putative
PF3D7_0208400	343308	349340	6033	-	1	32963	5.46378	conserved Plasmodium protein, unknown function
PF3D7_0208500	352836	353628	414	+	3	1672	4.03865	acyl carrier protein
PF3D7_0208600	354621	356117	1497	+	1	8441	5.63861	ribosome-recycling factor
PF3D7_0208700.1	356645	358014	621	-	6	1722	2.77295	conserved Plasmodium protein, unknown function, unspecified product
PF3D7_0208700.2	356501	358014	669	-	7	2152	3.21674	conserved Plasmodium protein, unknown function, unspecified product
PF3D7_0209300	387273	388151	723	+	2	3145	4.34993	2C-methyl-D-erythritol 2,4-cyclodiphosphate synthase
PF3D7_0209800	404281	406355	1374	-	2	13811	10.0517	ATP-dependent RNA helicase UAP56
PF3D7_0210000	409983	410228	246	+	1	3183	12.939	secretory complex protein 61 gamma subunit
PF3D7_0210100.1	412275	412859	291	+	3	8430	28.9691	60S ribosomal protein L37ae, putative
PF3D7_0210100.2	412275	412741	108	+	3	1326	12.2778	60S ribosomal protein L37ae, putative
PF3D7_0210200	413278	421137	7767	-	2	20086	2.58607	conserved Plasmodium protein, unknown function
PF3D7_0210400	425689	426497	360	+	4	793	2.20278	50S ribosomal protein L33, putative
PF3D7_0210900	442080	442934	855	-	1	6395	7.47953	conserved Plasmodium protein, unknown function
PF3D7_0211200	455579	456286	708	-	1	2050	2.89548	ras-related protein Rab-5A
PF3D7_0211700	469790	473491	3702	+	1	7949	2.14722	tyrosine kinase-like protein, putative
PF3D7_0211800	475242	477074	1833	+	1	6193	3.37861	asparagine--tRNA ligase
PF3D7_0211900	477432	479091	1353	-	3	7835	5.79084	conserved Plasmodium protein, unknown function
PF3D7_0212000	480100	481432	936	+	3	2387	2.55021	GDP-fructose:GMP antiporter, putative
PF3D7_0212200	489904	490818	768	-	2	2016	2.625	ribosomal protein L12, mitochondrial, putative
PF3D7_0212500	509525	521746	11973	+	2	36033	3.00952	conserved Plasmodium protein, unknown function
PF3D7_0212900	533253	534350	1098	+	1	4552	4.14572	arginyl-tRNA--protein transferase
PF3D7_0213000	535646	536146	501	+	1	3150	6.28743	conserved Plasmodium protein, unknown function
PF3D7_0213100	537789	539420	987	+	3	3128	3.1692	protein SIS1
PF3D7_0213200	540409	540969	381	-	2	1451	3.8084	conserved Plasmodium protein, unknown function
PF3D7_0213300	541086	541548	237	-	3	540	2.27848	conserved Plasmodium protein, unknown function
PF3D7_0214200	575155	576054	639	-	2	1794	2.80751	mitochondrial ribosomal protein L13 precursor, putative
PF3D7_0214900	610625	615372	2853	+	15	8797	3.08342	rhoptry neck protein 6
PF3D7_0215400	634589	637507	2919	-	1	6911	2.36759	conserved Plasmodium protein, unknown function
PF3D7_0215600	643106	644317	1212	-	1	2935	2.42162	conserved Plasmodium protein, unknown function
PF3D7_0216200	668985	669841	684	-	2	1921	2.80848	conserved Plasmodium protein, unknown function
PF3D7_0216700.1	690311	695783	4152	+	7	10323	2.48627	autophagy-related protein 11, putative
PF3D7_0216700.2	690311	695783	4134	+	7	10231	2.47484	autophagy-related protein 11, putative
PF3D7_0217100	707738	709393	1656	+	1	3935	2.37621	ATP synthase F1, alpha subunit
PF3D7_0217300	715798	716549	426	-	3	914	2.14554	AP-2 complex subunit sigma, putative
PF3D7_0217400	717692	718281	447	+	2	1757	3.93065	conserved Plasmodium protein, unknown function
PF3D7_0217800	734272	734595	324	+	1	4673	14.4228	40S ribosomal protein S26
PF3D7_0218000	738860	739852	993	+	1	2917	2.93756	replication factor C subunit 2, putative
PF3D7_0218200	743289	745712	2424	-	1	5935	2.44843	conserved Plasmodium protein, unknown function
PF3D7_0218300	747566	749365	1065	-	4	3996	3.75211	rRNA methyltransferase, putative
PF3D7_0218500	752966	753439	306	+	2	1198	3.91503	small nuclear ribonucleoprotein Sm D2, putative
PF3D7_0218600	755418	762560	7143	+	1	17496	2.44939	conserved Plasmodium protein, unknown function
PF3D7_0218700	763491	765191	1449	-	2	5392	3.72119	pre-mRNA-processing protein 45, putative
PF3D7_0218800	766390	767015	626	-	1	5127	8.1901	ribonuclease P
PF3D7_0218900	767584	767743	160	-	1	2186	13.6625	Plasmodium RNA of unknown function RUF2
PF3D7_0219000	767977	768058	82	-	1	912	11.122	small nucleolar RNA snoR01
PF3D7_0219200	772316	772690	177	+	2	5048	28.5198	40S ribosomal protein S30
PF3D7_0219300	773335	773754	420	-	1	1450	3.45238	conserved Plasmodium protein, unknown function
PF3D7_0219400.1	774815	776036	306	+	3	2681	8.76144	ribosome associated membrane protein RAMP4, putative, unspecified product
PF3D7_0219400.2	775639	776036	204	+	2	1546	7.57843	ribosome associated membrane protein RAMP4, putative, unspecified product
PF3D7_0219500	776828	778065	1017	-	2	2595	2.55162	pseudouridine synthase, putative
PF3D7_0220000	796752	801586	4677	+	2	16036	3.42869	liver stage antigen 3
PF3D7_0220200	809511	810298	543	-	2	9666	17.8011	Plasmodium exported protein, unknown function
PF3D7_0301400	85305	86131	732	-	2	1481	2.02322	Plasmodium exported protein, unknown function
PF3D7_0301700	96568	97907	954	-	2	5780	6.0587	Plasmodium exported protein, unknown function
PF3D7_0302200	119458	124735	4251	+	9	8857	2.08351	cytoadherence linked asexual protein 3.2
PF3D7_0302500	135418	140660	4254	+	9	23074	5.42407	cytoadherence linked asexual protein 3.1
PF3D7_0302700	146372	147056	459	-	3	992	2.16122	CDGSH iron-sulfur domain-containing protein, putative
PF3D7_0303200	169571	174300	3489	+	5	18333	5.25451	HAD superfamily protein, putative
PF3D7_0303300	175022	175799	462	-	2	1395	3.01948	DNA-directed RNA polymerases I, II, and III subunit RPABC2, putative
PF3D7_0303700	191245	192591	1347	-	1	4747	3.52413	lipoamide acyltransferase component of branched-chain alpha-keto acid dehydrogenase complex
PF3D7_0304400	217941	218489	315	+	2	9968	31.6444	60S ribosomal protein L44
PF3D7_0304800	227057	231397	4341	+	1	8711	2.00668	conserved Plasmodium membrane protein, unknown function
PF3D7_0305200	251242	254661	3420	+	1	9283	2.71433	conserved Plasmodium protein, unknown function
PF3D7_0305500	261485	273286	11802	-	1	24017	2.03499	conserved Plasmodium protein, unknown function
PF3D7_0305600	275864	277717	1854	-	1	6854	3.69687	AP endonuclease (DNA-[apurinic or apyrimidinic site] lyase), putative
PF3D7_0305700	278956	279828	429	-	3	2778	6.47552	ubiquitin-conjugating enzyme E2, putative
PF3D7_0306200	292943	294548	1050	+	5	2122	2.02095	activator of Hsp90 ATPase
PF3D7_0306300	295107	296094	336	-	5	3338	9.93452	glutaredoxin 1
PF3D7_0306600	302826	303083	258	+	1	678	2.62791	conserved Plasmodium protein, unknown function
PF3D7_0306700	304317	304999	351	+	4	1382	3.93732	membrane magnesium transporter, putative
PF3D7_0306900	310652	311805	438	+	3	10028	22.895	40S ribosomal protein S23, putative
PF3D7_0307100	312693	313342	426	-	2	5879	13.8005	40S ribosomal protein S12, putative
PF3D7_0307200	314976	316236	774	-	3	9957	12.8643	60S ribosomal protein L7, putative
PF3D7_0307400	321050	322162	1113	-	1	6427	5.77448	ATP-dependent Clp protease proteolytic subunit
PF3D7_0307600	325922	328383	2241	+	3	7071	3.15529	conserved Plasmodium protein, unknown function
PF3D7_0307700	328787	335269	5481	-	7	13158	2.40066	conserved Plasmodium protein, unknown function
PF3D7_0308500	369925	370789	423	+	3	1873	4.4279	activator of Hsp90 ATPase, putative
PF3D7_0308600	372632	374230	1599	+	1	3337	2.08693	pre-mRNA-processing factor 19, putative
PF3D7_0308800	378045	378517	327	+	2	878	2.68502	conserved protein, unknown function
PF3D7_0309200	389137	394604	4953	-	3	14237	2.87442	serine/threonine protein kinase, putative
PF3D7_0309500	402933	405440	1833	+	2	6180	3.37152	asparagine synthetase [glutamine-hydrolyzing], putative
PF3D7_0309600	407980	408318	339	+	1	11468	33.8289	60S acidic ribosomal protein P2
PF3D7_0310000	420697	421515	594	+	3	1696	2.85522	50S ribosomal protein L9, apicoplast, putative
PF3D7_0310200	427290	440942	13653	+	1	39232	2.87351	phd finger protein, putative
PF3D7_0310300	442720	446457	3498	+	2	7281	2.08148	phosphoglycerate mutase, putative
PF3D7_0310400	447500	451384	3885	+	1	28090	7.23037	parasite-infected erythrocyte surface protein
PF3D7_0310600.1	461175	462027	708	-	2	2782	3.92938	eukaryotic translation initiation factor 3 subunit K, putative, unspecified product
PF3D7_0310600.2	461175	462027	705	-	2	2782	3.9461	eukaryotic translation initiation factor 3 subunit K, putative, unspecified product
PF3D7_0310700	463326	464274	438	+	2	1502	3.42922	trafficking protein particle complex subunit 4, putative
PF3D7_0310800	464662	464991	330	+	1	1211	3.6697	conserved Plasmodium protein, unknown function
PF3D7_0311100	470860	473161	1803	-	4	4715	2.61509	pre-mRNA splicing factor, putative
PF3D7_0311300	480122	483453	2862	-	4	10102	3.5297	phosphatidylinositol 3- and 4-kinase, putative
PF3D7_0312300	521969	522883	915	+	1	3888	4.24918	26S proteasome regulatory subunit RPN12, putative
PF3D7_0312400	524154	526439	1323	-	7	8924	6.74528	glycogen synthase kinase 3
PF3D7_0312600	531213	531289	77	+	1	417	5.41558	tRNA Valine
PF3D7_0312700	531898	531973	76	-	1	213	2.80263	tRNA Isoleucine
PF3D7_0312800	534239	535238	381	+	3	7362	19.3228	60S ribosomal protein L26, putative
PF3D7_0313000	537621	538804	1041	-	2	2873	2.75985	conserved Plasmodium protein, unknown function
PF3D7_0313100	539743	542810	2424	+	4	10608	4.37624	ubiquitin-protein ligase, putative
PF3D7_0313200	543241	543942	702	-	1	2086	2.97151	conserved Plasmodium protein, unknown function
PF3D7_0314000	567247	568850	828	+	7	2248	2.71498	co-chaperone p23
PF3D7_0314300	577008	578366	1359	-	1	3145	2.3142	DER1-like protein
PF3D7_0314500	584226	585168	750	+	2	2113	2.81733	conserved Plasmodium protein, unknown function
PF3D7_0314600	586555	587331	777	+	1	4279	5.50708	conserved Plasmodium protein, unknown function
PF3D7_0315000	611334	612014	570	+	2	1195	2.09649	zinc finger protein, putative
PF3D7_0315400	630611	631381	771	-	1	12464	16.166	conserved Plasmodium protein, unknown function
PF3D7_0315500	632846	633544	699	-	1	2150	3.07582	mitochondrial ribosomal protein L29/L47 precursor, putative
PF3D7_0316100	648635	649531	897	+	1	2519	2.80825	mitochondrial ribosomal protein L27 precursor, putative
PF3D7_0316200	649849	657247	7272	-	2	16636	2.28768	conserved Plasmodium protein, unknown function
PF3D7_0316300.1	660020	661643	1143	+	3	14264	12.4794	inorganic pyrophosphatase, inorganic pyrophosphatase, putative
PF3D7_0316300.2	658272	661643	1296	+	5	15371	11.8603	inorganic pyrophosphatase, inorganic pyrophosphatase, putative
PF3D7_0316400	662126	665152	3027	-	1	8618	2.84704	conserved Plasmodium protein, unknown function
PF3D7_0316500	667006	668391	1386	+	1	3727	2.68903	kinetochore protein NUF2, putative
PF3D7_0316600	669302	670873	930	-	4	7313	7.86344	formate-nitrite transporter
PF3D7_0316700	674458	675636	666	+	2	1682	2.52553	protein YOP1, putative
PF3D7_0316800	677842	678474	393	+	2	6512	16.57	40S ribosomal protein S15A, putative
PF3D7_0316900	679234	681277	1803	-	2	6354	3.52413	E3 ubiquitin-protein ligase, putative
PF3D7_0317000	682795	683685	759	-	2	5247	6.91304	proteasome subunit alpha type-3, putative
PF3D7_0317200	690154	694815	4662	-	1	14098	3.02402	cdc2-related protein kinase 4
PF3D7_0317300	699544	709728	10185	-	1	35516	3.48709	conserved Plasmodium protein, unknown function
PF3D7_0317600	725015	726130	486	+	3	8790	18.0864	40S ribosomal protein S11, putative
PF3D7_0317700	728259	738076	8613	+	10	17821	2.06908	CPSF (cleavage and polyadenylation specific factor), subunit A, putative
PF3D7_0317800	738205	738882	678	-	1	2583	3.80973	26S proteasome non-ATPase regulatory subunit 9, putative
PF3D7_0318900	791840	793481	1323	-	3	10852	8.20257	conserved protein, unknown function
PF3D7_0319100	802260	802583	324	-	1	1704	5.25926	E3 ubiquitin-protein ligase RBX1, putative
PF3D7_0319200	803592	806312	2721	-	1	5608	2.06101	endonuclease/exonuclease/phosphatase family protein, putative
PF3D7_0319400	810081	814172	4092	+	1	8556	2.09091	kinesin-8, putative
PF3D7_0319500	815569	816855	930	+	4	2731	2.93656	RNA-binding protein, putative
PF3D7_0319600	817913	818695	471	+	3	3211	6.81741	elongation factor 1-delta, putative
PF3D7_0320000	837307	838271	435	+	5	2014	4.62989	protein phosphatase inhibitor 2
PF3D7_0320100	840362	841758	666	+	6	1432	2.15015	protein transport protein SEC22
PF3D7_0320300	845713	847320	1608	+	1	5060	3.14677	T-complex protein 1 subunit epsilon
PF3D7_0320500	860813	862102	1290	+	1	5356	4.15194	nicotinamidase, putative
PF3D7_0320600	862741	863832	399	-	5	1331	3.33584	conserved Plasmodium protein, unknown function
PF3D7_0320700	865014	866420	540	+	8	2921	5.40926	signal peptidase complex subunit SPC2, putative
PF3D7_0320800	870817	872342	1302	+	2	3770	2.89555	ATP-dependent RNA helicase DDX6
PF3D7_0320900	875213	876295	477	+	3	8198	17.1866	histone H2A.Z
PF3D7_0321000	877735	879511	1479	+	2	8539	5.7735	conserved Plasmodium protein, unknown function
PF3D7_0321600	900857	903369	2208	+	2	10641	4.81929	ATP-dependent RNA helicase DDX42, putative
PF3D7_0321800	912916	921036	8121	+	1	16464	2.02734	WD repeat-containing protein, putative
PF3D7_0322000	928644	929159	516	-	1	17032	33.0078	peptidyl-prolyl cis-trans isomerase
PF3D7_0322300	938212	940173	1962	-	1	7701	3.92508	diacylglycerol O-acyltransferase
PF3D7_0322400	942545	945301	2604	+	2	7008	2.69124	regulator of initiation factor 2 (eIF2)
PF3D7_0322500	945537	946751	1215	-	1	3525	2.90123	iron-sulfur assembly protein, putative
PF3D7_0322900	965553	966502	789	-	2	13699	17.3625	40S ribosomal protein S3A, putative
PF3D7_0323000	968675	969202	165	-	3	1821	11.0364	translation machinery-associated protein 7, putative
PF3D7_0323200	976870	978195	1326	+	1	2796	2.1086	conserved Plasmodium protein, unknown function
PF3D7_0323500	986265	987610	948	+	4	2357	2.48629	survival motor neuron-like protein
PF3D7_0323700	991544	993625	2082	-	1	5421	2.60375	U4/U6.U5 tri-snRNP-associated protein 1, putative
PF3D7_0400200	38955	40154	1200	+	1	4525	3.77083	erythrocyte membrane protein 1 (PfEMP1), exon 2, pseudogene
PF3D7_0401600.1	92576	93809	1044	-	2	7042	6.74521	rifin
PF3D7_0401600.2	92576	93809	1041	-	2	7042	6.76465	rifin
PF3D7_0402000	114601	116058	1287	-	2	20424	15.8695	Plasmodium exported protein (PHISTa), unknown function
PF3D7_0402400	147490	148380	765	-	2	10184	13.3124	Plasmodium exported protein, unknown function
PF3D7_0403200	178518	180200	1683	+	1	5331	3.16756	pre-mRNA splicing factor, putative
PF3D7_0403300	180430	181551	459	-	5	2251	4.90414	conserved Plasmodium protein, unknown function
PF3D7_0403600	197846	201208	2307	-	2	6830	2.96055	conserved Plasmodium protein, unknown function
PF3D7_0404300	234014	237013	1896	-	9	6506	3.43143	conserved Plasmodium protein, unknown function
PF3D7_0404700	260454	263418	2820	-	2	10007	3.54858	dipeptidyl aminopeptidase 3
PF3D7_0404900	267244	268380	1137	-	1	6267	5.51187	6-cysteine protein
PF3D7_0405200	279072	281983	1740	+	9	8715	5.00862	ag-1 blood stage membrane protein homologue
PF3D7_0405600	303329	305343	948	+	9	2183	2.30274	conserved Plasmodium membrane protein, unknown function
PF3D7_0405800	315562	315870	309	+	1	845	2.73463	conserved Plasmodium protein, unknown function
PF3D7_0405900	316540	319178	2196	-	4	12815	5.83561	apical sushi protein
PF3D7_0406100	323267	325225	1485	-	2	6531	4.39798	V-type proton ATPase subunit B
PF3D7_0406200	329216	329689	474	+	1	5038	10.6287	sexual stage-specific protein precursor
PF3D7_0406500	334282	344054	9636	-	2	26259	2.72509	NYN domain-containing protein, putative
PF3D7_0406800	351527	352983	861	-	5	1775	2.06156	ribosomal protein L25, putative
PF3D7_0407200	363599	364933	570	-	5	1153	2.02281	peptidyl-tRNA hydrolase 2, putative
PF3D7_0407400	367845	368153	309	-	1	1230	3.98058	conserved Plasmodium protein, unknown function
PF3D7_0407700	377481	383087	4890	-	6	10910	2.23108	conserved Plasmodium protein, unknown function
PF3D7_0407800	384924	390806	5883	+	1	11846	2.0136	conserved Plasmodium protein, unknown function
PF3D7_0408300	403626	405366	1035	-	5	2177	2.10338	zinc finger Ran-binding domain-containing protein 2, putative
PF3D7_0408500	408679	410697	2019	-	1	4678	2.31699	flap endonuclease 1
PF3D7_0408900.1	424300	427194	2082	+	5	8226	3.95101	tRNA N6-adenosine threonylcarbamoyltransferase
PF3D7_0408900.2	424300	427194	2076	+	5	8210	3.95472	tRNA N6-adenosine threonylcarbamoyltransferase
PF3D7_0409100	436217	437981	1605	-	2	4742	2.95452	U4/U6 small nuclear ribonucleoprotein PRP31, putative
PF3D7_0409500	449189	450633	1197	-	2	3498	2.92231	conserved Plasmodium protein, unknown function
PF3D7_0409700	456922	458020	585	+	4	1576	2.69402	peptide chain release factor 2
PF3D7_0409800	459710	461437	1728	+	1	6804	3.9375	zinc finger protein, putative
PF3D7_0410100	469218	469299	82	+	1	1182	14.4146	tRNA Serine
PF3D7_0410700	481177	483891	2715	-	1	9679	3.56501	ribosome biogenesis GTPase A, putative
PF3D7_0410800	485832	489728	3897	+	1	8006	2.0544	conserved Plasmodium protein, unknown function
PF3D7_0410900	490442	493375	2934	-	1	6085	2.07396	conserved Plasmodium protein, unknown function
PF3D7_0411900	528192	534485	5739	-	5	13715	2.38979	DNA polymerase alpha catalytic subunit A
PF3D7_0413500	615356	616243	888	+	1	6375	7.17905	phosphoglucomutase-2
PF3D7_0413600	616914	618350	1179	-	2	6150	5.21628	26S protease regulatory subunit 6B, putative
PF3D7_0413700	619786	620802	1017	-	1	5877	5.77876	lysine decarboxylase-like protein, putative
PF3D7_0413900	623168	626226	2562	-	4	7481	2.91998	ubiquitin carboxyl-terminal hydrolase 13, putative
PF3D7_0414000	626891	633126	3582	-	21	11509	3.21301	structural maintenance of chromosomes protein 3, putative
PF3D7_0414300	649893	650731	339	-	4	1447	4.26844	Rab5-interacting protein, putative
PF3D7_0414600	658620	659538	708	-	2	2085	2.94492	acylated pleckstrin-homology domain-containing protein, putative
PF3D7_0414700	660624	662519	1896	+	1	4134	2.18038	GTP-binding protein, putative
PF3D7_0415400	686414	687040	627	-	1	2646	4.2201	coatomer subunit zeta, putative
PF3D7_0415700	691131	692516	1386	-	1	6055	4.36869	conserved Plasmodium protein, unknown function
PF3D7_0415900	697918	698768	618	-	2	16832	27.2362	60S ribosomal protein L15, putative
PF3D7_0416000	701526	704162	1740	-	7	5368	3.08506	RNA-binding protein, putative
PF3D7_0416100	706529	709009	2481	+	1	7891	3.18057	glutamyl-tRNA(Gln) amidotransferase subunit A
PF3D7_0416200	709460	710083	624	-	1	1267	2.03045	conserved protein, unknown function
PF3D7_0416400	718202	722654	3780	+	4	11327	2.99656	histone acetyltransferase, putative
PF3D7_0416500	723073	724242	1170	-	1	3490	2.98291	repressor of RNA polymerase III transcription MAF1
PF3D7_0416600	726265	727128	864	+	1	5022	5.8125	conserved Plasmodium protein, unknown function
PF3D7_0416700	727710	727979	270	-	1	1996	7.39259	CDGSH iron-sulfur domain-containing protein, putative
PF3D7_0416800	729962	731223	579	+	3	10521	18.171	small GTP-binding protein sar1
PF3D7_0417300	750860	753712	2409	-	4	9723	4.03611	LETM1-like protein, putative
PF3D7_0417400	756294	776603	20310	+	1	84108	4.14121	conserved Plasmodium protein, unknown function
PF3D7_0418200	817400	818689	1290	+	1	5029	3.89845	eukaryotic translation initiation factor 3 subunit M, putative
PF3D7_0418300	819362	822340	2979	-	1	27583	9.25915	conserved Plasmodium protein, unknown function
PF3D7_0419200	854879	855289	411	+	1	1788	4.35036	protein transport protein GOT1, putative
PF3D7_0419600	870737	871873	843	+	2	7845	9.30605	ran-specific GTPase-activating protein 1, putative
PF3D7_0419700	873138	874115	978	+	1	5203	5.32004	apical merozoite protein
PF3D7_0419800	874811	875521	711	-	1	4694	6.60197	60S ribosomal protein L7ae/L30e, putative
PF3D7_0419900	878022	893866	15108	+	6	66371	4.3931	phosphatidylinositol 4-kinase, putative
PF3D7_0420000	894612	904724	10113	-	1	24591	2.43162	zinc finger protein, putative
PF3D7_0420400	929340	930140	801	+	1	2009	2.50811	ribosome-recycling factor
PF3D7_0420600	932463	934244	1782	+	1	5584	3.13356	conserved Plasmodium protein, unknown function
PF3D7_0422100	1001613	1002770	1158	+	1	3968	3.4266	transmembrane emp24 domain-containing protein, putative
PF3D7_0422400	1026648	1027399	513	+	2	8829	17.2105	40S ribosomal protein S19
PF3D7_0423000	1047696	1048478	783	+	1	3232	4.12771	conserved Plasmodium protein, unknown function
PF3D7_0423100	1049270	1049894	441	-	2	3749	8.50113	AP-4 complex subunit sigma, putative
PF3D7_0423200	1050407	1050974	411	+	2	1711	4.16302	BSD-domain protein, putative
PF3D7_0423300	1051576	1053006	1431	-	1	5443	3.80363	conserved Plasmodium protein, unknown function
PF3D7_0423400	1055665	1056318	654	+	1	1411	2.15749	apical asparagine-rich protein AARP
PF3D7_0423500	1058997	1060551	1119	+	2	4002	3.57641	glideosome associated protein with multiple membrane spans 2
PF3D7_0423600	1061790	1066628	4839	-	1	17256	3.56603	conserved Plasmodium protein, unknown function
PF3D7_0423700	1071435	1071845	411	-	1	1620	3.94161	early transcribed membrane protein 4
PF3D7_0500800	43327	47761	4305	-	2	225186	52.308	mature parasite-infected erythrocyte surface antigen
PF3D7_0501000	55841	56872	783	+	2	9396	12	Plasmodium exported protein, unknown function
PF3D7_0501200	64065	65489	1227	+	2	7815	6.36919	parasite-infected erythrocyte surface protein
PF3D7_0501500	81134	82336	1203	-	1	4511	3.74979	rhoptry-associated protein 3
PF3D7_0501600	84041	85237	1197	-	1	8453	7.06182	rhoptry-associated protein 2
PF3D7_0501800	91361	94591	3231	+	1	10206	3.15877	chromosome assembly factor 1
PF3D7_0501900	95161	96633	1146	-	2	2541	2.21728	conserved protein, unknown function
PF3D7_0502100	102193	102897	705	-	1	1630	2.31206	HCNGP-like protein
PF3D7_0502900	123332	123904	249	-	3	1126	4.52209	Tim10/DDP family zinc finger protein, putative
PF3D7_0503000	125116	126514	789	+	5	4853	6.15082	50S ribosomal protein L28, apicoplast, putative
PF3D7_0503300	135004	135930	927	-	1	6875	7.4164	serine/arginine-rich splicing factor 12
PF3D7_0503400	140710	141471	369	+	2	6012	16.2927	actin-depolymerizing factor 1
PF3D7_0503800	151422	152384	363	-	3	5164	14.2259	60S ribosomal protein L31
PF3D7_0504800	187813	204732	16920	-	1	41116	2.43002	conserved Plasmodium protein, unknown function
PF3D7_0504900	206450	208375	519	+	9	1450	2.79383	conserved protein, unknown function
PF3D7_0505700	247801	250575	2775	-	1	11662	4.20252	conserved Plasmodium membrane protein, unknown function
PF3D7_0505800	252047	252606	303	-	2	6809	22.4719	small ubiquitin-related modifier
PF3D7_0505900	254473	255517	381	-	6	793	2.08136	conserved Plasmodium protein, unknown function
PF3D7_0506000	256225	257378	741	+	3	3091	4.17139	conserved Plasmodium protein, unknown function
PF3D7_0506100	257748	258831	615	-	3	2619	4.25854	60S ribosomal subunit protein L24, putative
PF3D7_0506300	260961	262184	1224	-	1	4376	3.57516	conserved Plasmodium protein, unknown function
PF3D7_0506900	288776	291055	2280	-	1	12985	5.69518	rhomboid protease ROM4
PF3D7_0507100	294668	295903	1236	-	1	31497	25.483	60S ribosomal protein L4
PF3D7_0507700	316766	318361	1596	-	1	5066	3.17419	nuclear protein localization protein 4, putative
PF3D7_0507800	322239	326822	4584	+	1	13943	3.04167	conserved Plasmodium protein, unknown function
PF3D7_0507900	327656	328316	354	+	3	888	2.50847	conserved Plasmodium protein, unknown function
PF3D7_0508000	328666	329715	1050	-	1	4710	4.48571	6-cysteine protein
PF3D7_0508600	356222	357010	789	+	1	2170	2.75032	conserved Plasmodium protein, unknown function
PF3D7_0508700	358261	362733	4473	+	1	13306	2.97474	pre-mRNA-processing ATP-dependent RNA helicase PRP5, putative
PF3D7_0508800	363588	364442	855	-	1	3907	4.56959	single-stranded DNA-binding protein
PF3D7_0508900	367022	376426	9405	+	1	29806	3.16917	conserved Plasmodium protein, unknown function
PF3D7_0509000	376855	378452	897	-	5	2057	2.2932	alpha-soluble NSF attachment protein, putative
PF3D7_0509100	381077	386203	5127	+	1	29870	5.82602	structural maintenance of chromosomes protein 4, putative
PF3D7_0509300	388696	389191	348	-	2	1360	3.90805	conserved Plasmodium protein, unknown function
PF3D7_0509800	410268	415308	4680	+	4	10551	2.25449	phosphatidylinositol 4-kinase
PF3D7_0510100	422746	430353	7608	-	1	47983	6.30691	conserved Plasmodium protein, unknown function
PF3D7_0510500	445983	448502	2520	-	1	9446	3.74841	topoisomerase I
PF3D7_0510900	465782	465939	158	+	1	643	4.06962	small nucleolar RNA snoR04
PF3D7_0511000	467585	468100	516	-	1	6206	12.0271	translationally-controlled tumor protein homolog
PF3D7_0511200	471055	474058	2850	+	2	10849	3.80667	stearoyl-CoA desaturase
PF3D7_0511500	486602	516787	30186	+	1	144290	4.78003	RNA pseudouridylate synthase, putative
PF3D7_0511600	517259	517885	627	-	1	2149	3.42743	apical rhoptry neck protein
PF3D7_0511800	520720	522693	1815	-	2	8031	4.42479	inositol-3-phosphate synthase
PF3D7_0512000	527639	528666	360	+	5	1904	5.28889	prefoldin subunit 6, putative
PF3D7_0512100	528846	529409	387	-	2	1965	5.07752	conserved Plasmodium protein, unknown function
PF3D7_0512600	544540	545993	603	+	6	2029	3.36484	ras-related protein Rab-1B
PF3D7_0512700	546734	547579	846	-	1	3077	3.63712	orotate phosphoribosyltransferase
PF3D7_0513000	555264	556073	810	+	1	2625	3.24074	conserved Plasmodium protein, unknown function
PF3D7_0513200	559513	568384	8292	+	4	24769	2.9871	conserved Plasmodium protein, unknown function
PF3D7_0513300	569182	569919	738	-	1	8466	11.4715	purine nucleoside phosphorylase
PF3D7_0513500	573588	574248	375	+	2	1114	2.97067	mitochondrial import inner membrane translocase subunit TIM16, putative
PF3D7_0513600	574941	578505	3342	-	2	20237	6.05536	deoxyribodipyrimidine photo-lyase, putative
PF3D7_0513800	585357	585980	624	-	1	2841	4.55288	ras-related protein Rab-1A
PF3D7_0514300	600047	603433	3387	+	1	6999	2.06643	aspartate--tRNA ligase, putative
PF3D7_0515100	624719	626481	1467	-	3	3190	2.17451	rhomboid protease ROM9
PF3D7_0515300	628981	635382	6402	+	1	15693	2.45127	phosphatidylinositol 3-kinase
PF3D7_0515700	653966	655336	1371	-	1	11075	8.07805	glideosome-associated protein 40, putative
PF3D7_0515800	658423	658677	255	-	1	598	2.3451	BolA-like protein, putative
PF3D7_0515900	660150	661136	987	-	1	2946	2.9848	NLI interacting factor-like phosphatase, putative
PF3D7_0516200	675809	676614	456	-	3	4837	10.6075	40S ribosomal protein S11
PF3D7_0516600	686810	691642	4833	-	1	13320	2.75605	sporozoite surface antigen MB2
PF3D7_0516800	700120	707256	7137	-	1	27975	3.91971	AP2 domain transcription factor AP2-O2, putative
PF3D7_0516900	712762	713772	783	-	2	10997	14.0447	60S ribosomal protein L2
PF3D7_0517000	715765	716675	498	-	2	12400	24.8996	60S ribosomal protein L12, putative
PF3D7_0517300	724681	725751	897	-	2	3508	3.91081	serine/arginine-rich splicing factor 1
PF3D7_0517400	731407	735162	3426	+	3	8574	2.50263	FACT complex subunit SPT16, putative
PF3D7_0517700	743179	745329	2151	+	1	6468	3.00697	eukaryotic translation initiation factor 3 subunit B, putative
PF3D7_0518200	758503	758898	396	-	1	2751	6.94697	SWIB/MDM2 domain-containing protein
PF3D7_0518300	759831	760998	723	-	4	4547	6.28907	proteasome subunit beta type-1, putative
PF3D7_0519100	790399	790773	375	+	1	1090	2.90667	50S ribosomal protein L14, mitochondrial, putative
PF3D7_0519200	791719	792936	498	-	5	3372	6.77108	V-type proton ATPase 16 kDa proteolipid subunit
PF3D7_0519400	798036	798775	402	-	2	18070	44.9502	40S ribosomal protein S24
PF3D7_0519500	801450	809127	7467	-	2	18220	2.44007	carbon catabolite repressor protein 4, putative
PF3D7_0519700	817066	819139	579	+	3	4566	7.88601	FoP domain-containing protein, putative
PF3D7_0519900	825835	827412	1578	-	1	4368	2.76806	conserved Plasmodium protein, unknown function
PF3D7_0520000	828953	829883	570	+	3	10459	18.3491	40S ribosomal protein S9, putative
PF3D7_0520300	838428	839083	312	+	3	852	2.73077	U6 snRNA-associated Sm-like protein LSm2, putative
PF3D7_0520400	839655	840560	906	-	1	3529	3.89514	single-stranded DNA-binding protein, putative
PF3D7_0520600	843586	844817	459	-	5	1240	2.70153	bis(5'-nucleosyl)-tetraphosphatase [asymmetrical]
PF3D7_0520800	849862	856026	6165	-	1	15897	2.57859	conserved Plasmodium protein, unknown function
PF3D7_0520900	857038	858477	1440	+	1	13341	9.26458	adenosylhomocysteinase
PF3D7_0521000	859373	861063	1557	-	2	5458	3.50546	conserved Plasmodium protein, unknown function
PF3D7_0521300	870184	874570	4038	-	3	12312	3.04903	zinc finger protein, putative
PF3D7_0521400	875873	877561	1689	-	1	4683	2.77265	conserved Plasmodium protein, unknown function
PF3D7_0522000	896018	896940	324	+	4	2612	8.06173	conserved Plasmodium protein, unknown function
PF3D7_0522200	901414	902173	351	+	4	1434	4.08547	transcription initiation factor TFIID subunit 10, putative
PF3D7_0522500	937231	938037	501	+	3	1011	2.01796	50S ribosomal protein L17, apicoplast, putative
PF3D7_0522800	944184	944931	444	-	3	922	2.07658	pre-mRNA-splicing factor BUD31, putative
PF3D7_0523300	970266	970962	393	-	3	1014	2.58015	conserved Plasmodium protein, unknown function
PF3D7_0523400	973518	975876	1602	+	4	4372	2.72909	DnaJ protein, putative
PF3D7_0523500	976690	977815	342	-	6	767	2.24269	dynein light chain Tctex-type, putative
PF3D7_0523900	993433	994607	612	-	3	1335	2.18137	conserved Plasmodium membrane protein, unknown function
PF3D7_0524000	998753	1002124	3372	+	1	16910	5.01483	karyopherin beta
PF3D7_0524100	1004237	1008108	3732	+	2	9478	2.53966	conserved Plasmodium protein, unknown function
PF3D7_0524500	1016198	1016569	372	+	1	2075	5.57796	conserved Plasmodium protein, unknown function
PF3D7_0524600	1017809	1018582	774	+	1	6649	8.59044	50S ribosomal protein L12, apicoplast, putative
PF3D7_0525000	1036229	1038343	2115	+	1	5826	2.75461	zinc finger protein, putative
PF3D7_0525200	1045462	1051253	5550	+	3	18748	3.37802	structural maintenance of chromosomes protein 6, putative
PF3D7_0525600	1066526	1067712	1056	-	2	2266	2.14583	RNA methyltransferase, putative
PF3D7_0525700	1068516	1069285	396	+	2	837	2.11364	conserved Plasmodium protein, unknown function
PF3D7_0525800	1071247	1072149	903	+	1	1862	2.06202	inner membrane complex protein 1g, putative
PF3D7_0526200.1	1081558	1083816	1521	-	6	3447	2.26627	ADP-ribosylation factor GTPase-activating protein, putative
PF3D7_0526200.2	1081558	1083816	1518	-	6	3447	2.27075	ADP-ribosylation factor GTPase-activating protein, putative
PF3D7_0526300	1085623	1086594	972	-	1	2229	2.29321	WD repeat-containing protein, putative
PF3D7_0526400	1088423	1089508	1086	+	1	2557	2.35451	conserved Plasmodium protein, unknown function
PF3D7_0526700	1117261	1119651	2391	-	1	5926	2.47846	conserved protein, unknown function
PF3D7_0526800	1120704	1121810	1107	-	1	3500	3.1617	conserved Plasmodium protein, unknown function
PF3D7_0526900	1123610	1124595	645	+	4	3548	5.50078	transmembrane emp24 domain-containing protein, putative
PF3D7_0527000	1125099	1128146	2889	-	2	9878	3.41918	DNA replication licensing factor MCM3, putative
PF3D7_0527100	1129959	1130754	459	-	4	2805	6.11111	ubiquitin-conjugating enzyme E2 N, putative
PF3D7_0527200	1132937	1134854	1818	-	2	9370	5.15402	ubiquitin carboxyl-terminal hydrolase 14
PF3D7_0527300	1135976	1137870	984	-	3	2303	2.34045	methionine aminopeptidase 1a, putative
PF3D7_0527400	1140627	1141154	528	+	1	1774	3.35985	conserved Plasmodium protein, unknown function
PF3D7_0527500	1143618	1145359	1377	+	2	15284	11.0995	Hsc70-interacting protein
PF3D7_0527600	1145857	1148810	1368	-	11	4983	3.64254	conserved Plasmodium protein, unknown function
PF3D7_0528000	1156205	1156579	375	-	1	4311	11.496	proteasome maturation factor UMP1, putative
PF3D7_0528200	1163408	1165072	1554	-	2	7027	4.52188	eukaryotic translation initiation factor 3 subunit E, putative
PF3D7_0528400	1171659	1173890	1221	+	8	2485	2.03522	palmitoyltransferase DHHC7
PF3D7_0528600	1176969	1177286	318	-	1	1545	4.85849	conserved Plasmodium protein, unknown function
PF3D7_0528700	1178276	1178890	615	-	1	1688	2.74472	peptidyl-prolyl cis-trans isomerase
PF3D7_0529100	1191000	1191682	552	-	2	1872	3.3913	thioredoxin-like protein, putative
PF3D7_0529400.1	1199165	1205187	4749	+	9	21190	4.46199	conserved Plasmodium protein, unknown function
PF3D7_0529400.2	1199165	1205187	4509	+	10	19260	4.27146	conserved Plasmodium protein, unknown function
PF3D7_0529800	1213533	1219376	5721	+	2	19981	3.49257	conserved Plasmodium protein, unknown function
PF3D7_0529900	1220777	1221992	855	-	3	5372	6.28304	RING zinc finger protein, putative
PF3D7_0530000	1224598	1224891	294	-	1	2050	6.97279	conserved Plasmodium protein, unknown function
PF3D7_0530100	1226883	1227757	678	+	2	1720	2.53687	SNARE protein, putative
PF3D7_0530200	1229077	1230651	1575	-	1	3625	2.30159	phosphoenolpyruvate/phosphate translocator
PF3D7_0531500	1288559	1289308	750	+	1	4264	5.68533	unspecified product
PF3D7_0531600	1289601	1291692	2092	+	1	16983	8.11807	18S ribosomal RNA
PF3D7_0531800	1292052	1292210	159	+	1	1104	6.9434	5.8S ribosomal RNA
PF3D7_0531900	1292211	1292409	199	+	1	399	2.00503	unspecified product
PF3D7_0532000	1292410	1296199	3790	+	1	241461	63.71	28S ribosomal RNA
PF3D7_0532100	1301224	1301769	546	+	1	16292	29.8388	early transcribed membrane protein 5
PF3D7_0532400	1312471	1314154	1587	+	2	6415	4.04222	lysine-rich membrane-associated PHISTb protein
PF3D7_0532500	1316342	1316846	366	+	2	1196	3.26776	Plasmodium exported protein, unknown function
PF3D7_0532600	1318531	1319229	486	-	2	1209	2.48765	Plasmodium exported protein, unknown function
PF3D7_0601200	47463	48261	705	+	2	3532	5.00993	Pfmc-2TM Maurer's cleft two transmembrane protein
PF3D7_0601600	68833	69693	861	-	1	2162	2.51103	tetratricopeptide repeat protein, putative
PF3D7_0601900	78190	78784	387	+	2	1117	2.8863	conserved Plasmodium protein, unknown function
PF3D7_0602400	101385	104561	2814	-	4	6612	2.34968	elongation factor G
PF3D7_0602900	118638	120203	1413	-	2	3084	2.18259	conserved Plasmodium protein, unknown function
PF3D7_0603000	122634	124412	1779	+	1	4906	2.75773	conserved Plasmodium protein, unknown function
PF3D7_0603200	128621	130036	1416	+	1	3350	2.36582	mitochondrial chaperone BCS1, putative
PF3D7_0603400	133150	136461	3312	-	1	10101	3.04982	trophozoite exported protein 1
PF3D7_0604100	171301	177240	5940	-	1	14856	2.50101	AP2 domain transcription factor
PF3D7_0604500	189012	198078	8625	+	4	47967	5.56139	conserved Plasmodium protein, unknown function
PF3D7_0604700	204640	206207	924	-	6	1902	2.05844	glyoxalase I
PF3D7_0604900	212415	213032	288	-	3	949	3.29514	conserved Plasmodium protein, unknown function
PF3D7_0605800	237811	244521	6711	-	1	24022	3.5795	DNA repair protein RAD50, putative
PF3D7_0606100	257604	259974	1749	+	4	6146	3.51401	RNA-binding protein, putative
PF3D7_0606700	282049	287017	4539	+	4	10193	2.24565	coatomer alpha subunit, putative
PF3D7_0606800	288377	289276	900	-	1	2468	2.74222	VFT protein
PF3D7_0606900	290426	291085	660	-	1	1394	2.11212	glutaredoxin-like protein
PF3D7_0607000	293864	296797	2934	+	1	22894	7.803	translation initiation factor IF-2, putative
PF3D7_0607200	301874	303290	1290	-	2	3001	2.32636	RING zinc finger protein, putative
PF3D7_0607600	313856	316882	2586	-	5	7498	2.89946	spindle assembly abnormal protein 6, putative
PF3D7_0607700	320740	328998	8259	+	1	20728	2.50975	conserved Plasmodium protein, unknown function
PF3D7_0608100	337792	341760	3969	+	1	13537	3.41068	conserved Plasmodium protein, unknown function
PF3D7_0608200	341874	342821	471	-	4	1450	3.07856	conserved Plasmodium protein, unknown function
PF3D7_0608400	349946	350515	321	-	2	1066	3.32087	conserved Plasmodium protein, unknown function
PF3D7_0608500	351780	352775	708	-	2	4874	6.88418	proteasome subunit alpha type-2, putative
PF3D7_0608600	355229	356276	852	+	2	1806	2.11972	conserved Plasmodium protein, unknown function
PF3D7_0608700	358391	360203	1632	+	2	6666	4.08456	T-complex protein 1 subunit zeta
PF3D7_0608800	362635	363879	1245	+	1	7776	6.24578	ornithine aminotransferase
PF3D7_0609000	370261	388494	18234	+	1	50889	2.79089	conserved Plasmodium protein, unknown function
PF3D7_0609800	421157	422622	855	-	4	2432	2.84444	palmitoyltransferase DHHC2, putative
PF3D7_0610100	434807	436465	1335	-	3	7329	5.48989	pre-mRNA-splicing factor SLU7, putative
PF3D7_0610200	437663	440545	2883	-	1	7540	2.61533	RNA-binding protein 25, putative
PF3D7_0610400	444747	445157	411	+	1	250911	610.489	histone H3
PF3D7_0610500	445761	446363	372	-	2	774	2.08065	peptidyl-tRNA hydrolase PTRHD1, putative
PF3D7_0610800	453671	455689	2019	+	1	5332	2.64091	transketolase
PF3D7_0610900	456747	460589	3843	-	1	12293	3.1988	transcription elongation factor SPT5, putative
PF3D7_0611600	485114	487066	1953	-	1	9733	4.98361	basal complex transmembrane protein 1
PF3D7_0611700	488579	489287	156	-	3	2005	12.8526	60S ribosomal protein L39
PF3D7_0611900	506380	507198	531	+	3	1673	3.15066	lsm12, putative
PF3D7_0612100	509160	511130	1971	-	1	5025	2.54947	eukaryotic translation initiation factor 3 subunit L, putative
PF3D7_0612200	512972	519548	5595	-	8	17470	3.12243	leucine-rich repeat protein
PF3D7_0612700	525987	527030	1044	-	1	5364	5.13793	6-cysteine protein
PF3D7_0612900	531126	533186	2061	+	1	5885	2.85541	nucleolar GTP-binding protein 1, putative
PF3D7_0613000.1	533932	535364	366	-	6	1020	2.78689	conserved Plasmodium protein, unknown function
PF3D7_0613000.2	533932	535364	351	-	5	973	2.77208	conserved Plasmodium protein, unknown function
PF3D7_0613000.3	533907	535364	357	-	5	1307	3.66106	conserved Plasmodium protein, unknown function
PF3D7_0613100	537778	538585	237	+	4	973	4.10549	conserved Plasmodium protein, unknown function
PF3D7_0613200	539304	539674	183	+	2	704	3.84699	conserved Plasmodium protein, unknown function
PF3D7_0613300	540077	544798	4269	-	4	9037	2.11689	rhoptry protein ROP14
PF3D7_0613400	546964	547741	642	+	2	4389	6.83645	50S ribosomal protein L18, apicoplast, putative
PF3D7_0613700	559349	561460	2112	-	1	5787	2.74006	syntaxin-binding protein, putative
PF3D7_0613800	566139	578993	12330	+	3	61745	5.0077	AP2 domain transcription factor, putative
PF3D7_0614000	587019	588635	1617	-	1	3525	2.17996	thiamine-phosphate synthase, putative
PF3D7_0614300	597484	600517	2562	-	4	12638	4.93286	major facilitator superfamily-related transporter, putative
PF3D7_0614400	604573	605340	768	+	1	2609	3.39714	pre-mRNA-splicing factor CWF7, putative
PF3D7_0614500	606142	607259	549	-	3	15169	27.6302	60S ribosomal protein L19
PF3D7_0614900	617762	621536	3291	+	3	11239	3.41507	conserved Plasmodium membrane protein, unknown function
PF3D7_0615000	622272	622712	441	+	1	1101	2.4966	conserved Plasmodium protein, unknown function
PF3D7_0615300	627693	630317	2625	-	1	6666	2.53943	GPI-anchored wall transfer protein 1, putative
PF3D7_0615400	630956	640174	8190	-	9	42346	5.17045	ribonuclease, putative
PF3D7_0615500	644052	646169	2118	+	1	7900	3.72993	cdc2-related protein kinase 5
PF3D7_0615700	656376	657636	471	+	7	1283	2.72399	RNA and export factor binding protein, putative
PF3D7_0615900	662435	667855	5421	-	1	19002	3.50526	protein phosphatase, putative
PF3D7_0616100	672119	672754	444	+	2	994	2.23874	conserved Plasmodium protein, unknown function
PF3D7_0616200	674118	676375	1776	+	5	6714	3.78041	kinetochore protein NDC80, putative
PF3D7_0616300	676888	677571	684	-	1	2773	4.05409	conserved Plasmodium protein, unknown function
PF3D7_0617200	717050	718917	1341	+	4	19687	14.6808	conserved Plasmodium protein, unknown function
PF3D7_0617800	748416	748814	399	-	1	377377	945.807	histone H2A
PF3D7_0617900	754395	754805	411	+	1	25786	62.7397	histone H3 variant
PF3D7_0618200	764667	765492	600	-	2	2874	4.79	conserved Plasmodium protein, unknown function
PF3D7_0618300	768792	769456	447	+	2	10460	23.4004	60S ribosomal protein L27a, putative
PF3D7_0618600	775980	777835	825	-	8	1798	2.17939	rhomboid protease ROM10
PF3D7_0618700	778692	779636	855	+	2	2966	3.46901	trafficking protein particle complex subunit 6A, putative
PF3D7_0618900.1	784354	788027	2190	+	10	5179	2.36484	phosphatidylinositol N-acetylglucosaminyltransferase subunit GPI1
PF3D7_0618900.2	784354	787118	1731	+	5	4290	2.47834	phosphatidylinositol N-acetylglucosaminyltransferase subunit GPI1
PF3D7_0619000.1	788707	796025	5391	-	14	12575	2.33259	conserved protein, unknown function
PF3D7_0619000.2	788707	796025	5394	-	14	12575	2.33129	conserved protein, unknown function
PF3D7_0619400	815622	818247	2487	-	2	7278	2.92642	cell division cycle protein 48 homologue, putative
PF3D7_0619700	828199	830389	1902	-	3	4947	2.60095	conserved Plasmodium protein, unknown function
PF3D7_0621000	862882	865416	2535	+	1	9545	3.76529	conserved Plasmodium protein, unknown function
PF3D7_0621200	871297	872202	906	-	1	5610	6.19205	pyridoxine biosynthesis protein PDX1
PF3D7_0621300	873809	876190	2382	+	1	4816	2.02183	mRNA binding Pumilio-homology domain protein, putative
PF3D7_0621500	881963	882994	1032	+	1	2567	2.4874	ribonuclease P/MRP protein subunit RPP1, putative
PF3D7_0621600	883563	883644	82	-	1	209	2.54878	tRNA Serine
PF3D7_0621800	891997	892777	555	+	3	8434	15.1964	nascent polypeptide-associated complex subunit alpha, putative
PF3D7_0621900	893450	895780	2331	-	1	5055	2.1686	signal recognition particle subunit SRP68, putative
PF3D7_0622200	903740	906322	2583	-	1	5740	2.22222	radical SAM protein, putative
PF3D7_0622400	911503	911889	387	+	1	818	2.1137	conserved Apicomplexan protein, unknown function
PF3D7_0622600	914743	915429	291	+	4	962	3.30584	cytochrome b-c1 complex subunit 9, putative
PF3D7_0622800	919685	924028	4344	+	1	13118	3.0198	leucine--tRNA ligase, putative
PF3D7_0623100	939660	943720	2361	-	12	8328	3.52732	nuclear polyadenylated RNA-binding protein NAB2, putative
PF3D7_0623200	946129	947244	1116	+	1	2384	2.1362	ferredoxin--NADP reductase
PF3D7_0623300	947493	948644	711	-	4	2503	3.52039	EGF-like membrane protein, putative
PF3D7_0623900	977183	978049	867	+	1	2207	2.54556	ribonuclease H2 subunit A, putative
PF3D7_0624000	981066	982547	1482	+	1	3923	2.6471	hexokinase
PF3D7_0624200	985047	986870	1026	-	7	3747	3.65205	conserved Plasmodium protein, unknown function
PF3D7_0624400	990375	992198	1824	-	1	6386	3.5011	conserved Plasmodium protein, unknown function
PF3D7_0624500	994284	994553	270	+	1	2053	7.6037	anaphase-promoting complex subunit 11, putative
PF3D7_0624600	999524	1007683	8160	+	1	49261	6.03689	SNF2 helicase, putative
PF3D7_0624700	1009457	1010718	744	-	6	1884	2.53226	N-acetylglucosaminylphosphatidylinositol deacetylase, putative
PF3D7_0625200	1025179	1026336	1158	+	1	2740	2.36615	conserved Plasmodium protein, unknown function
PF3D7_0625300	1026823	1031157	4335	-	1	13122	3.02699	DNA polymerase 1, putative
PF3D7_0625500	1035358	1036371	1014	+	1	2399	2.36588	conserved Plasmodium membrane protein, unknown function
PF3D7_0625700	1042652	1042948	297	-	1	684	2.30303	conserved Plasmodium protein, unknown function
PF3D7_0626800	1078995	1081320	1536	+	3	27205	17.7116	pyruvate kinase
PF3D7_0627300	1097300	1098649	1350	-	1	7853	5.81704	E3 ubiquitin-protein ligase RNF5, putative
PF3D7_0627500	1101734	1102852	570	-	3	3453	6.05789	protein DJ-1
PF3D7_0628200	1159862	1169080	9219	+	1	34580	3.75095	eukaryotic translation initiation factor 2-alpha kinase
PF3D7_0628300	1170813	1173696	1176	-	12	6065	5.15731	choline/ethanolaminephosphotransferase, putative
PF3D7_0628600	1180573	1182353	1158	-	5	2495	2.15458	DNA methyltransferase 1-associated protein 1, putative
PF3D7_0628700	1183896	1185617	1722	+	1	6251	3.63008	conserved Plasmodium protein, unknown function
PF3D7_0629200	1199853	1200995	1143	-	1	10047	8.79003	DnaJ protein, putative
PF3D7_0629500	1213948	1216005	1821	-	2	3943	2.16529	amino acid transporter, putative
PF3D7_0629700	1221941	1242922	20262	+	6	71036	3.50587	SET domain protein, putative
PF3D7_0631000	1295474	1296331	858	+	1	2483	2.89394	tetratricopeptide repeat protein, putative
PF3D7_0701600	71049	71860	708	+	2	1868	2.63842	Pfmc-2TM Maurer's cleft two transmembrane protein
PF3D7_0702900	113144	113948	324	-	4	661	2.04012	centrin, putative
PF3D7_0703200	122513	127135	4623	-	1	12771	2.76249	conserved Plasmodium protein, unknown function
PF3D7_0703500	135606	142505	6900	+	1	15048	2.18087	erythrocyte membrane-associated antigen
PF3D7_0703600	144019	145953	789	+	10	2411	3.05577	conserved Plasmodium protein, unknown function
PF3D7_0703700	146645	147394	750	-	1	3324	4.432	conserved Plasmodium protein, unknown function
PF3D7_0704100	180036	190715	10680	+	1	41948	3.92772	conserved Plasmodium membrane protein, unknown function
PF3D7_0704300	197691	203249	5559	+	1	29605	5.3256	conserved Plasmodium membrane protein, unknown function
PF3D7_0704500	208690	213501	4812	-	1	12587	2.61575	serine/threonine protein kinase, putative
PF3D7_0704600	216024	229072	11682	-	8	53662	4.59356	E3 ubiquitin-protein ligase
PF3D7_0705000	246259	250152	3642	-	2	9503	2.60928	mRNA cap guanine-N7 methyltransferase, putative
PF3D7_0705300	261977	264454	2478	+	1	7912	3.1929	origin recognition complex subunit 2, putative
PF3D7_0705400	264973	267438	2466	-	1	4989	2.02311	DNA replication licensing factor MCM7
PF3D7_0705500	270022	278706	8445	-	2	20352	2.40995	inositol-phosphate phosphatase, putative
PF3D7_0705700	285472	286166	165	-	3	2080	12.6061	40S ribosomal protein S29, putative
PF3D7_0705900	290100	291220	501	-	4	2530	5.0499	ATP synthase subunit C, putative
PF3D7_0706000	293400	297089	3690	+	1	16290	4.41463	importin-7, putative
PF3D7_0706300	305563	306032	357	+	2	1076	3.01401	conserved Plasmodium protein, unknown function
PF3D7_0706400	306855	307133	279	-	1	8654	31.0179	60S ribosomal protein L37
PF3D7_0706500	309902	315022	5121	-	1	17989	3.51279	conserved Plasmodium protein, unknown function
PF3D7_0707200	329936	336325	6390	-	1	14069	2.20172	conserved Plasmodium protein, unknown function
PF3D7_0707300	338885	342083	2586	+	5	51190	19.7951	rhoptry-associated membrane antigen
PF3D7_0707600	353986	354720	735	+	1	1481	2.01497	conserved Plasmodium protein, unknown function
PF3D7_0707700	357700	360585	2886	+	1	7859	2.72315	E3 ubiquitin-protein ligase, putative
PF3D7_0707800	362005	365779	3552	+	3	9396	2.64527	RAP protein, putative
PF3D7_0707900	366929	367708	780	+	1	3378	4.33077	ribosomal protein S8e, putative
PF3D7_0708100	372897	373106	210	-	1	513	2.44286	DNA-directed RNA polymerases I, II, and III subunit RPABC5, putative
PF3D7_0708400	381592	384614	2238	+	2	54415	24.3141	heat shock protein 90
PF3D7_0708800	395711	398332	2622	+	1	19203	7.3238	heat shock protein 110
PF3D7_0708900	399290	400243	954	-	1	2870	3.00839	protein SCO1, putative
PF3D7_0709050	406820	407448	629	-	1	9658	15.3545	small nucleolar RNA
PF3D7_0709100	408215	411961	3747	+	1	13656	3.64452	Cg1 protein
PF3D7_0709400	423236	427234	3846	-	2	8550	2.22309	Cg7 protein
PF3D7_0709500	428723	429346	408	+	2	858	2.10294	conserved Plasmodium protein, unknown function
PF3D7_0709800	437900	438094	195	+	1	509	2.61026	conserved protein, unknown function
PF3D7_0710000	447515	458496	9804	-	7	22518	2.29682	conserved Plasmodium protein, unknown function
PF3D7_0710100	460057	461436	1380	+	1	3993	2.89348	conserved Plasmodium protein, unknown function
PF3D7_0710200	463105	471837	8733	+	1	59835	6.8516	conserved Plasmodium protein, unknown function
PF3D7_0710600	478468	479138	453	-	2	9518	21.011	60S ribosomal protein L34
PF3D7_0710700	481369	481974	606	-	1	4030	6.65017	conserved Plasmodium protein, unknown function
PF3D7_0710800	482701	483831	1131	-	1	2920	2.58179	conserved Plasmodium protein, unknown function
PF3D7_0711000	487281	490970	3690	-	1	17912	4.8542	AAA family ATPase, CDC48 subfamily
PF3D7_0711300	499336	499695	360	+	1	845	2.34722	conserved Plasmodium protein, unknown function
PF3D7_0711400	500408	502594	2187	-	1	5061	2.31413	histone deacetylase complex subunit SAP18, putative
PF3D7_0711500	505245	507311	2067	+	1	5758	2.78568	regulator of chromosome condensation, putative
PF3D7_0713400	612458	613740	1074	+	2	3425	3.18901	GPCR-like receptor SR25
PF3D7_0713700	621463	623521	630	-	9	1826	2.89841	conserved Plasmodium protein, unknown function
PF3D7_0713800	624379	625300	723	-	2	1660	2.29599	negative elongation factor A, putative
PF3D7_0713900	627067	637776	10710	-	1	25592	2.38954	conserved Plasmodium protein, unknown function
PF3D7_0714000	643101	643472	372	-	1	13189	35.4543	histone H2B variant
PF3D7_0714500	664956	666167	1212	+	1	4001	3.30116	transcription elongation factor s-II, putative
PF3D7_0714600	667985	669712	1728	+	1	6487	3.75405	conserved Plasmodium protein, unknown function
PF3D7_0715400	687891	688848	660	-	3	1529	2.31667	secreted ookinete protein, putative
PF3D7_0715500	689543	690057	216	-	3	500	2.31481	ATP synthase subunit epsilon, mitochondrial, putative
PF3D7_0715800	695600	696904	1305	-	1	5823	4.46207	drug/metabolite transporter DMT1, putative
PF3D7_0715900	699239	700909	1671	+	1	8122	4.86056	cation diffusion facilitator family protein, putative
PF3D7_0716100	707699	710908	3210	-	1	6509	2.02773	protein SDA1, putative
PF3D7_0716300	717281	718968	1569	+	2	23636	15.0644	conserved Plasmodium protein, unknown function
PF3D7_0716800	732070	733496	984	-	3	7740	7.86585	eukaryotic translation initiation factor 3 subunit I, putative
PF3D7_0716900	736370	737338	969	+	1	3082	3.1806	drug/metabolite transporter DMT2
PF3D7_0717000	738578	741209	897	+	14	2318	2.58417	conserved Plasmodium membrane protein, unknown function
PF3D7_0717200	745191	746663	1296	-	2	4247	3.27701	conserved Plasmodium protein, unknown function
PF3D7_0717500	755763	757696	1587	+	2	4389	2.7656	calcium-dependent protein kinase 4
PF3D7_0717600	758720	762877	3162	-	8	8631	2.7296	conserved Plasmodium protein, unknown function
PF3D7_0717700	764794	766413	1620	-	1	7592	4.68642	serine--tRNA ligase, putative
PF3D7_0718400	822438	823015	390	+	2	2134	5.47179	mitochondrial ribosomal protein S8 precursor, putative
PF3D7_0718500	824445	825884	579	+	6	2260	3.90328	prefoldin subunit 3, putative
PF3D7_0719000	838135	838596	462	+	1	2331	5.04545	conserved Plasmodium protein, unknown function
PF3D7_0719100	838990	840024	540	-	4	2244	4.15556	conserved Plasmodium protein, unknown function
PF3D7_0719400	848398	853593	5196	-	1	21231	4.08603	conserved Plasmodium protein, unknown function
PF3D7_0719500	854652	856654	1416	-	3	4543	3.20833	LEM3/CDC50 family protein, putative
PF3D7_0719600	858742	859492	522	-	2	7905	15.1437	60S ribosomal protein L11a, putative
PF3D7_0719700	861583	862487	414	+	3	11186	27.0193	40S ribosomal protein S10, putative
PF3D7_0720000	876795	877500	588	+	2	1410	2.39796	exosome complex component CSL4, putative
PF3D7_0720100	877865	878632	768	-	1	1792	2.33333	small subunit rRNA processing protein, putative
PF3D7_0720200	879454	879946	366	+	2	996	2.72131	conserved Plasmodium protein, unknown function
PF3D7_0720500	886346	887487	405	+	6	1622	4.00494	conserved Plasmodium protein, unknown function
PF3D7_0720600	887816	889378	711	-	7	2658	3.7384	conserved Plasmodium protein, unknown function
PF3D7_0720700	891683	899051	6501	+	4	18929	2.91171	phosphoinositide-binding protein, putative
PF3D7_0720800	899751	901137	597	+	7	1674	2.80402	Ham1-like protein, putative
PF3D7_0721000	904143	914671	10380	+	2	32122	3.09461	conserved Plasmodium membrane protein, unknown function
PF3D7_0721100	916434	917168	735	+	1	16996	23.1238	conserved Plasmodium protein, unknown function
PF3D7_0721400	926692	928028	645	+	6	1651	2.55969	conserved Plasmodium protein, unknown function
PF3D7_0721600	931459	932164	588	-	2	12631	21.4813	40S ribosomal protein S5, putative
PF3D7_0721800	938279	938895	321	+	3	1966	6.12461	conserved Plasmodium protein, unknown function
PF3D7_0721900	939715	940250	237	-	3	568	2.39662	V-type ATPase V0 subunit e, putative
PF3D7_0722000	941776	942513	738	+	1	2612	3.5393	conserved Plasmodium protein, unknown function
PF3D7_0722200	946363	948612	2250	+	1	25071	11.1427	rhoptry-associated leucine zipper-like protein 1
PF3D7_0722300	949449	953114	3666	-	1	8673	2.36579	ubiquitin carboxyl-terminal hydrolase, putative
PF3D7_0722400	954784	956343	1182	+	3	3460	2.92724	Obg-like ATPase 1, putative
PF3D7_0722500	956920	958017	876	-	2	3283	3.74772	pre-mRNA-splicing factor CWC15, putative
PF3D7_0722600	958886	960694	1809	-	1	4865	2.68933	U3 small nucleolar RNA-associated protein 7, putative
PF3D7_0722700	962031	962447	240	+	2	615	2.5625	conserved Plasmodium protein, unknown function
PF3D7_0723400	978920	983188	4269	-	1	10412	2.43898	conserved Plasmodium protein, unknown function
PF3D7_0723600	986598	987365	450	+	3	1315	2.92222	proteasome assembly chaperone 4, putative
PF3D7_0723800	993232	1000233	6573	+	4	24195	3.68097	conserved Plasmodium protein, unknown function
PF3D7_0724100	1013295	1016449	3012	-	2	11314	3.75631	conserved Plasmodium protein, unknown function
PF3D7_0725000	1058933	1062976	4044	-	1	8329	2.05959	exonuclease I, putative
PF3D7_0725200	1070980	1071737	447	+	4	1874	4.19239	mago nashi protein homologue, putative
PF3D7_0725400	1079015	1080055	330	+	4	1495	4.5303	conserved Plasmodium protein, unknown function
PF3D7_0725600	1083761	1085847	2087	+	1	17050	8.16962	18S ribosomal RNA
PF3D7_0725800	1086213	1086371	159	+	1	1104	6.9434	5.8S ribosomal RNA
PF3D7_0725900	1086372	1086569	198	+	1	435	2.19697	unspecified product
PF3D7_0726000	1086570	1090357	3788	+	1	251861	66.4892	28S ribosomal RNA
PF3D7_0726500	1126556	1136577	9552	-	4	34060	3.56575	ubiquitin carboxyl-terminal hydrolase, putative
PF3D7_0726700	1143303	1143815	513	-	1	1822	3.55166	conserved Plasmodium protein, unknown function
PF3D7_0727400	1162710	1163831	771	+	3	3250	4.2153	proteasome subunit alpha type-5, putative
PF3D7_0728000	1191179	1192289	990	-	2	4487	4.53232	eukaryotic translation initiation factor 2 subunit alpha, putative
PF3D7_0728300	1213841	1214476	636	-	1	1334	2.09748	conserved Plasmodium protein, unknown function
PF3D7_0728400.1	1215174	1215763	381	+	2	3159	8.29134	conserved Plasmodium protein, unknown function
PF3D7_0728400.2	1215174	1215763	381	+	2	3176	8.33596	conserved Plasmodium protein, unknown function
PF3D7_0728500	1216088	1217201	432	-	5	1217	2.81713	conserved Plasmodium protein, unknown function
PF3D7_0728600	1218426	1225473	6489	+	5	19337	2.97997	RING zinc finger protein, putative
PF3D7_0728800	1230589	1232180	1401	+	2	4016	2.86652	conserved Plasmodium protein, unknown function
PF3D7_0728900	1232272	1234672	1479	-	8	4970	3.36038	RNA-binding protein, putative
PF3D7_0729200	1247398	1248264	723	+	2	1462	2.02213	1-cys peroxiredoxin
PF3D7_0729300	1248837	1251503	2667	-	1	5926	2.22197	60S ribosomal export protein NMD3, putative
PF3D7_0729600	1258787	1259730	492	+	5	1899	3.85976	conserved Plasmodium protein, unknown function
PF3D7_0730300	1297459	1301454	3996	+	1	17672	4.42242	AP2 domain transcription factor AP2-L, putative
PF3D7_0730500	1305894	1314215	8322	-	1	16740	2.01154	conserved Plasmodium protein, unknown function
PF3D7_0731300	1350032	1351149	954	+	2	6862	7.19287	Plasmodium exported protein (PHISTb), unknown function
PF3D7_0731600	1368161	1370596	2436	+	1	35006	14.3703	acyl-CoA synthetase
PF3D7_0801100	91397	97571	6175	-	1	15446	2.50138	28S ribosomal RNA
PF3D7_0801700	112299	117877	5355	+	3	13293	2.48235	sentrin-specific protease 2, putative
PF3D7_0801800	119032	122067	3036	-	1	17933	5.90679	mannose-6-phosphate isomerase, putative
PF3D7_0802000	146089	150282	4194	+	1	24091	5.74416	glutamate dehydrogenase, putative
PF3D7_0802100	151808	159668	7734	-	2	19577	2.53129	AP2 domain transcription factor, putative
PF3D7_0802200	165416	166078	663	+	1	10697	16.1342	1-cys peroxiredoxin
PF3D7_0803000	196581	198614	2034	+	1	6294	3.0944	peptidyl-prolyl cis-trans isomerase
PF3D7_0803100	199181	202918	3738	-	1	12341	3.3015	U3 small nucleolar RNA-associated protein 14, putative
PF3D7_0803200	204241	206661	2187	-	2	9654	4.41427	filament assembling protein, putative
PF3D7_0803800	233467	234426	798	-	2	9700	12.1554	proteasome subunit beta type-4
PF3D7_0803900	236442	236571	130	-	1	3612	27.7846	C/D small nucleolar RNA
PF3D7_0804000	237853	241048	2409	+	3	11513	4.77916	cactin homolog, putative
PF3D7_0804400	245711	247933	2223	+	1	5252	2.36257	methionine aminopeptidase 1c, putative
PF3D7_0804500	250083	268437	18105	+	2	66956	3.6982	conserved Plasmodium membrane protein, unknown function
PF3D7_0804800	278381	279034	654	+	1	2619	4.00459	peptidyl-prolyl cis-trans isomerase
PF3D7_0805600	312034	312960	927	+	1	2295	2.47573	PAP2-like protein, putative
PF3D7_0806100	330651	332678	2028	+	1	6564	3.23669	conserved Plasmodium protein, unknown function
PF3D7_0806400	344288	344821	534	+	1	1208	2.26217	glycosyltransferase family 28 protein, putative
PF3D7_0806800	363260	366421	3162	-	1	16651	5.26597	V-type proton ATPase subunit a, putative
PF3D7_0807300	381564	382847	606	+	4	1335	2.20297	ras-related protein Rab-18
PF3D7_0807500	387219	388364	783	+	3	10579	13.5109	proteasome subunit alpha type-6, putative
PF3D7_0807600	389596	394259	4005	-	4	10110	2.52434	conserved Plasmodium protein, unknown function
PF3D7_0807800	399591	401360	1446	-	2	6335	4.38105	26S proteasome regulatory subunit RPN10, putative
PF3D7_0807900	402595	404141	1122	+	3	4140	3.68984	tyrosine--tRNA ligase
PF3D7_0808300	421493	422640	717	+	3	1957	2.72943	ubiquitin regulatory protein, putative
PF3D7_0808400	423527	424536	837	+	2	2555	3.05257	coatomer subunit epsilon, putative
PF3D7_0809300	474253	475285	1033	-	1	8726	8.44724	unspecified product
PF3D7_0809400	475573	478125	2553	+	1	7437	2.91304	conserved Plasmodium protein, unknown function
PF3D7_0810000	517421	517693	273	-	1	2096	7.67766	acyl-CoA binding protein, putative
PF3D7_0810100	519331	519991	336	-	2	858	2.55357	apicoplast ribosomal protein L33 precursor, putative
PF3D7_0810300	525058	527604	1653	-	4	8968	5.42529	protein phosphatase PPM5, putative
PF3D7_0810600	541971	544796	2826	+	1	9159	3.24098	ATP-dependent RNA helicase DBP1, putative
PF3D7_0810900.1	551199	552428	1038	-	2	2260	2.17726	conserved Plasmodium protein, unknown function
PF3D7_0811200	560744	564276	3402	+	2	14991	4.40653	ER membrane protein complex subunit 1, putative
PF3D7_0811300	567824	573148	5325	+	1	18173	3.41277	CCR4-associated factor 1
PF3D7_0811400	575986	578370	1827	+	4	5142	2.81445	conserved protein, unknown function
PF3D7_0811800	593649	595412	1764	-	1	4632	2.62585	conserved Plasmodium protein, unknown function
PF3D7_0812400	621805	623442	1638	-	1	6225	3.80037	karyopherin alpha
PF3D7_0812500	626069	628945	2877	-	1	13345	4.63851	RNA-binding protein, putative
PF3D7_0812800	635537	635755	219	-	1	449	2.05023	conserved protein, unknown function
PF3D7_0813000	643086	644885	1800	-	1	5085	2.825	conserved Plasmodium protein, unknown function
PF3D7_0813200	651417	652804	942	-	4	2365	2.51062	CS domain protein, putative
PF3D7_0813300	656078	657630	948	+	2	7203	7.5981	conserved Plasmodium protein, unknown function
PF3D7_0813400	658493	662095	1980	-	6	5822	2.9404	conserved Plasmodium protein, unknown function
PF3D7_0813500	665548	667095	1548	-	1	4149	2.68023	PUB domain-containing protein, putative
PF3D7_0813600	669541	670734	807	+	4	3703	4.5886	translation initiation factor SUI1, putative
PF3D7_0813900	677989	678725	435	-	2	7436	17.0943	40S ribosomal protein S16, putative
PF3D7_0814000	680957	681809	648	+	2	24750	38.1944	60S ribosomal protein L13-2, putative
PF3D7_0814200	687340	688086	747	+	1	52809	70.6948	DNA/RNA-binding protein Alba 1
PF3D7_0814900	708228	708824	597	+	1	2462	4.12395	superoxide dismutase [Fe]
PF3D7_0815000	709545	710600	1056	-	1	2442	2.3125	selenoprotein
PF3D7_0815400	725781	726502	483	-	2	1286	2.66253	conserved Apicomplexan protein, unknown function
PF3D7_0815500	727662	729728	1476	+	5	5734	3.88482	conserved Plasmodium protein, unknown function
PF3D7_0815600	729917	732187	807	-	10	8157	10.1078	eukaryotic translation initiation factor 3 subunit G, putative
PF3D7_0815800	735680	741181	5502	-	1	20110	3.65503	vacuolar protein sorting-associated protein 9, putative
PF3D7_0816200	750082	750711	630	-	1	2088	3.31429	vacuolar protein sorting-associated protein 2, putative
PF3D7_0816700	767110	767880	432	+	4	1342	3.10648	trafficking protein particle complex subunit 2-like protein, putative
PF3D7_0817200	777257	779647	2391	-	1	5458	2.28273	conserved Plasmodium protein, unknown function
PF3D7_0817500	798777	800205	558	+	6	8183	14.6649	protein kinase c inhibitor-like protein, putative
PF3D7_0817800	815150	815451	165	+	2	478	2.89697	conserved Plasmodium protein, unknown function
PF3D7_0817900	816803	817102	300	-	1	13956	46.52	high mobility group protein B2
PF3D7_0818000	821334	822452	1119	+	1	2384	2.13047	U4/U6.U5 small nuclear ribonucleoprotein, putative
PF3D7_0818200	830006	831454	789	+	4	11628	14.7376	14-3-3 protein
PF3D7_0818400	835978	836848	597	-	2	3584	6.00335	rRNA-processing protein FCF1, putative
PF3D7_0818500	842317	843215	576	+	2	5809	10.0851	zinc finger protein, putative
PF3D7_0818700	848277	852947	3672	-	5	12227	3.32979	DNA helicase, putative
PF3D7_0818900	860384	862417	2034	+	1	59956	29.4769	heat shock protein 70
PF3D7_0819600	885198	886136	834	-	2	4306	5.16307	conserved Plasmodium protein, unknown function
PF3D7_0819900	899004	899657	276	-	4	693	2.51087	U6 snRNA-associated Sm-like protein LSm3, putative
PF3D7_0820300	919055	920896	1842	+	1	4976	2.70141	conserved Plasmodium protein, unknown function
PF3D7_0821400	965822	966657	375	+	2	1851	4.936	conserved Plasmodium protein, unknown function
PF3D7_0821700	973586	974267	420	+	3	7178	17.0905	60S ribosomal protein L22, putative
PF3D7_0821800	976074	976644	243	+	3	3080	12.6749	protein transport protein SEC61 subunit beta, putative
PF3D7_0821900	977432	978188	324	-	4	715	2.20679	conserved Plasmodium protein, unknown function
PF3D7_0822100	981018	981722	705	-	1	1437	2.0383	mediator of RNA polymerase II transcription subunit 7, putative
PF3D7_0823200	1022629	1023846	861	-	3	2452	2.84785	RNA-binding protein, putative
PF3D7_0823300	1028752	1033514	4398	+	4	9479	2.1553	histone acetyltransferase GCN5
PF3D7_0823700	1041832	1042327	201	-	2	895	4.45274	mitochondrial import receptor subunit TOM7, putative
PF3D7_0823800	1043813	1045780	1968	+	1	5496	2.79268	DnaJ protein, putative
PF3D7_0824400	1062304	1064061	1758	-	1	8556	4.86689	nucleoside transporter 2
PF3D7_0824800	1075800	1079630	3831	+	1	13951	3.64161	conserved Plasmodium membrane protein, unknown function
PF3D7_0825000	1086048	1091248	4995	+	2	14792	2.96136	conserved Plasmodium protein, unknown function
PF3D7_0825300	1095116	1095562	447	-	1	1405	3.14318	SAYSvFN domain-containing protein, putative
PF3D7_0825500	1098484	1100376	1893	+	1	4092	2.16165	protein KRI1, putative
PF3D7_0826100	1113369	1139144	25776	-	1	54791	2.12566	HECT-like E3 ubiquitin ligase, putative
PF3D7_0826700	1160164	1161708	972	-	2	16247	16.715	receptor for activated c kinase
PF3D7_0826900	1164655	1167205	2259	+	3	7103	3.14431	conserved Plasmodium protein, unknown function
PF3D7_0827000	1167579	1171448	3870	-	1	10626	2.74574	ATP-dependent RNA helicase DBP10, putative
PF3D7_0827300	1181295	1183796	2502	+	1	5583	2.23141	conserved Plasmodium protein, unknown function
PF3D7_0827500	1186175	1187125	951	+	1	3587	3.77182	apicoplast ribosomal protein L21 precursor, putative
PF3D7_0827600	1187623	1192925	5055	-	2	17463	3.4546	conserved Plasmodium protein, unknown function
PF3D7_0827800	1198858	1206057	7200	+	1	15963	2.21708	SET domain protein, putative
PF3D7_0827900	1206788	1208394	1452	-	2	28743	19.7955	protein disulfide isomerase
PF3D7_0828200	1216271	1220716	4446	+	1	10389	2.33671	leucine--tRNA ligase, putative
PF3D7_0828300	1221025	1222683	1659	-	1	5792	3.49126	conserved Plasmodium protein, unknown function
PF3D7_0828500	1226750	1228409	1029	-	4	2618	2.54422	translation initiation factor eIF-2B subunit alpha, putative
PF3D7_0829100	1252349	1253796	651	+	7	2146	3.29647	conserved protein, unknown function
PF3D7_0829200	1254558	1255376	819	+	1	2073	2.53114	prohibitin, putative
PF3D7_0829300	1256555	1257133	288	+	4	1178	4.09028	U6 snRNA-associated Sm-like protein LSm8, putative
PF3D7_0829900	1275625	1278795	3171	+	1	109590	34.5601	unspecified product
PF3D7_0830100	1280935	1283761	2827	+	1	7898	2.79377	unspecified product
PF3D7_0830400	1294022	1294722	414	+	2	5755	13.901	CRA domain-containing protein, putative
PF3D7_0830700	1307053	1307924	657	+	2	1615	2.45814	Plasmodium exported protein (hyp9), unknown function
PF3D7_0830900	1317600	1318341	579	-	2	1165	2.01209	Plasmodium exported protein, unknown function
PF3D7_0831400	1344405	1345487	909	-	2	4478	4.92629	Plasmodium exported protein, unknown function
PF3D7_0831500	1353456	1354669	1008	+	2	2675	2.65377	Plasmodium exported protein (PHIST), unknown function
PF3D7_0831700	1365467	1367506	2040	-	1	16485	8.08088	heat shock protein 70
PF3D7_0901700	82002	82998	684	-	2	3306	4.83333	Plasmodium exported protein (hyp5), unknown function
PF3D7_0901800	84624	85610	810	+	2	2716	3.35309	Plasmodium exported protein, unknown function
PF3D7_0903000	129224	129700	477	+	1	1696	3.55556	conserved protein, unknown function
PF3D7_0903100	130140	130937	606	-	2	1546	2.55116	protein RER1, putative
PF3D7_0903200	133762	135587	621	-	7	6349	10.2238	ras-related protein RAB7
PF3D7_0903300	140977	150588	9612	+	1	49324	5.1315	conserved Plasmodium membrane protein, unknown function
PF3D7_0903400	151700	159541	7611	-	2	15251	2.00381	ATP-dependent RNA helicase DDX60, putative
PF3D7_0903700	175542	177442	1362	+	3	3890	2.85609	alpha tubulin 1
PF3D7_0903900	185821	186383	396	+	2	12732	32.1515	60S ribosomal protein L32
PF3D7_0904000	187342	188622	1281	-	1	6464	5.04606	GTPase-activating protein, putative
PF3D7_0904400	208168	208725	558	-	1	2890	5.17921	signal peptidase complex subunit 3, putative
PF3D7_0904500	210077	210609	390	+	2	1072	2.74872	prefoldin subunit 4, putative
PF3D7_0904600	212515	217983	5313	+	2	17040	3.20723	ubiquitin specific protease, putative
PF3D7_0904700	218675	219462	570	-	2	2449	4.29649	bacterial histone-like protein
PF3D7_0904800	222271	224156	1455	+	2	3133	2.15326	replication protein A1, small fragment
PF3D7_0904900	224875	232831	7707	-	3	33423	4.33671	copper-transporting ATPase
PF3D7_0905400	270740	274789	2694	-	7	44233	16.4191	high molecular weight rhoptry protein 3
PF3D7_0905500	278369	279088	720	+	1	1994	2.76944	conserved Plasmodium protein, unknown function
PF3D7_0906910	335982	336770	789	+	1	1705	2.16096	tubulin-specific chaperone, putative
PF3D7_0907000	337564	337920	243	+	2	1540	6.33745	conserved Plasmodium protein, unknown function
PF3D7_0907400	351955	354723	2769	-	1	13248	4.7844	ATP-dependent protease ATPase subunit ClpY
PF3D7_0907700	364069	364908	840	-	1	3907	4.65119	proteasome activator 28 subunit beta, putative
PF3D7_0907800	366925	367500	576	+	1	5428	9.42361	ribosomal protein L35, apicoplast, putative
PF3D7_0907900	367865	368789	726	-	2	4381	6.03444	peptide deformylase
PF3D7_0908400	388149	388736	588	+	1	2355	4.0051	conserved Plasmodium protein, unknown function
PF3D7_0908800	404312	406285	1773	+	2	3883	2.19007	mitochondrial carrier protein, putative
PF3D7_0909600	433238	435373	1815	-	3	7110	3.91736	conserved Plasmodium protein, unknown function
PF3D7_0909800	445788	446329	351	+	3	1042	2.96866	small nuclear ribonucleoprotein Sm D3, putative
PF3D7_0910200	464559	473768	9210	+	1	25233	2.73974	conserved Plasmodium protein, unknown function
PF3D7_0910300	475671	476969	1299	+	1	5399	4.15627	conserved Plasmodium protein, unknown function
PF3D7_0910800	494163	495506	1344	+	1	2755	2.04985	cytosolic Fe-S cluster assembly factor NBP35, putative
PF3D7_0911600	529912	531444	1533	+	1	4215	2.74951	conserved Plasmodium protein, unknown function
PF3D7_0911800	535851	536681	831	-	1	4726	5.68712	conserved Plasmodium protein, unknown function
PF3D7_0911900	538221	539872	1242	-	2	5159	4.15378	falstatin
PF3D7_0912000	541033	545739	4707	-	1	13990	2.97217	conserved Plasmodium protein, unknown function
PF3D7_0912400	551426	553167	1341	-	2	7343	5.47576	alkaline phosphatase, putative
PF3D7_0912500	556090	557958	867	+	7	2373	2.73702	SAP domain-containing protein, putative
PF3D7_0912900	567283	568640	1017	+	2	6721	6.60865	26S proteasome regulatory subunit RPN8, putative
PF3D7_0913000	569124	570374	444	-	5	1773	3.99324	conserved protein, unknown function
PF3D7_0913200	575679	576509	831	+	1	13678	16.4597	elongation factor 1-beta
PF3D7_0913500	582340	583968	1299	-	3	3728	2.8699	protease, putative
PF3D7_0913700	589263	591242	1980	+	1	8129	4.10556	conserved Plasmodium protein, unknown function
PF3D7_0914400	617963	619835	750	+	6	1569	2.092	conserved Plasmodium protein, unknown function
PF3D7_0914500	620788	626149	5187	-	2	12719	2.45209	conserved Plasmodium protein, unknown function
PF3D7_0914600	627754	628319	336	+	2	1556	4.63095	transcription elongation factor 1, putative
PF3D7_0915100	643232	644043	480	-	4	1298	2.70417	SUMO-conjugating enzyme UBC9
PF3D7_0915600	660176	660892	717	+	1	2200	3.06834	conserved Plasmodium protein, unknown function
PF3D7_0915900	665978	666478	501	+	1	3309	6.60479	conserved Plasmodium protein, unknown function
PF3D7_0916200	675922	679632	3435	+	2	9307	2.70946	conserved Plasmodium protein, unknown function
PF3D7_0916800	703368	703517	150	+	1	1364	9.09333	conserved Plasmodium protein, unknown function
PF3D7_0916900	705357	706355	999	+	1	8324	8.33233	zinc finger protein, putative
PF3D7_0917900	737985	740276	1959	+	2	46486	23.7295	heat shock protein 70
PF3D7_0918000	742494	743684	1191	-	1	17790	14.937	glideosome-associated protein 50
PF3D7_0918100	747173	748490	393	+	6	1182	3.00763	cytochrome b5-like heme/steroid binding protein, putative
PF3D7_0918200	748678	750262	954	-	5	4041	4.23585	50S ribosomal protein L3, apicoplast, putative
PF3D7_0918300	751358	752422	963	-	2	2718	2.82243	eukaryotic translation initiation factor 3 subunit F, putative
PF3D7_0918500	761211	763358	2148	+	1	24294	11.3101	telomerase RNA
PF3D7_0919000	781368	782675	810	-	3	8695	10.7346	nucleosome assembly protein
PF3D7_0919100	786156	788212	1113	+	5	10793	9.69721	DnaJ protein, putative
PF3D7_0919600	800703	802136	1434	+	1	3056	2.1311	dolichyl-diphosphooligosaccharide--protein glycosyltransferase 48 kDa subunit, putative
PF3D7_0919800	804417	807920	3237	-	2	7495	2.31542	TLD domain-containing protein
PF3D7_0919900	809659	819804	10146	-	1	46422	4.5754	regulator of chromosome condensation, putative
PF3D7_0920500	841536	842655	576	+	5	2219	3.85243	ADP-ribosylation factor, putative
PF3D7_0920700	849515	851296	1782	+	1	4248	2.38384	CRAL/TRIO domain-containing protein, putative
PF3D7_0920900	855516	857286	1443	+	2	6712	4.65142	U4/U6 snRNA-associated-splicing factor, putative
PF3D7_0921000.1	857587	858829	492	-	6	1818	3.69512	ubiquitin-conjugating enzyme E2, putative
PF3D7_0921000.2	857587	858829	447	-	5	1801	4.02908	ubiquitin-conjugating enzyme E2, putative
PF3D7_0921700	883515	885592	1710	-	3	11412	6.67368	conserved Plasmodium protein, unknown function
PF3D7_0921900	888559	889305	747	+	1	5975	7.99866	conserved Plasmodium protein, unknown function
PF3D7_0922100	895415	900304	4629	+	3	17444	3.76842	ubiquitin-like protein, putative
PF3D7_0922200	903362	904570	1209	+	1	38164	31.5666	S-adenosylmethionine synthetase
PF3D7_0922500	913230	914480	1251	+	1	4624	3.69624	phosphoglycerate kinase
PF3D7_0922700	919109	921302	1032	-	10	2839	2.75097	pre-mRNA-splicing factor 18, putative
PF3D7_0922800	922292	935372	12768	-	3	30590	2.39583	conserved Plasmodium protein, unknown function
PF3D7_0923400	950408	953722	3315	+	1	8011	2.41659	conserved Plasmodium protein, unknown function
PF3D7_0923800.1	961933	963786	1854	-	1	5339	2.87972	thioredoxin reductase
PF3D7_0923800.2	961933	963558	1626	-	1	3441	2.11624	thioredoxin reductase
PF3D7_0923900	966795	968069	609	-	6	3428	5.6289	RNA-binding protein, putative
PF3D7_0924000	972548	976637	3879	+	2	9676	2.49446	patatin-like phospholipase, putative
PF3D7_0924400	988977	992915	3738	+	2	13293	3.55618	conserved Plasmodium protein, unknown function
PF3D7_0924700	1006773	1008542	1770	+	1	3937	2.22429	splicing factor 3A subunit 3, putative
PF3D7_0925300	1019164	1020903	1740	-	1	3792	2.17931	proline--tRNA ligase, putative
PF3D7_0925900	1040713	1041516	654	+	2	13038	19.9358	conserved Plasmodium protein, unknown function
PF3D7_0926200	1063053	1063208	156	+	1	980	6.28205	conserved Plasmodium protein, unknown function
PF3D7_0926400	1070965	1072955	1590	-	2	3918	2.46415	monocarboxylate transporter, putative
PF3D7_0926800	1092844	1096521	3678	-	1	7720	2.09897	conserved Plasmodium protein, unknown function
PF3D7_0927500	1120100	1121331	339	-	5	1480	4.36578	dynein light chain, putative
PF3D7_0927600	1123861	1125858	1788	+	2	12643	7.07103	RNA-binding protein, putative
PF3D7_0927800	1128871	1129940	822	+	2	2367	2.87956	cytochrome c oxidase subunit 5B, putative
PF3D7_0927900	1131074	1132135	1062	-	1	2911	2.74105	phosphatidylserine decarboxylase
PF3D7_0928000.1	1135545	1136391	312	+	4	1984	6.35897	cytochrome c oxidase subunit 6B, putative
PF3D7_0928000.2	1135545	1136391	252	+	4	1478	5.86508	cytochrome c oxidase subunit 6B, putative
PF3D7_0928500	1146239	1147197	465	-	4	1100	2.36559	conserved Plasmodium protein, unknown function
PF3D7_0928600	1148161	1148502	342	-	1	2101	6.14327	conserved Plasmodium protein, unknown function
PF3D7_0929100	1163570	1165475	1026	+	6	2494	2.4308	conserved Plasmodium protein, unknown function
PF3D7_0929200	1167842	1169577	870	+	6	3035	3.48851	RNA-binding protein, putative
PF3D7_0929300	1171339	1173483	2145	+	1	4703	2.19254	conserved Plasmodium protein, unknown function
PF3D7_0929400	1175203	1180762	4137	+	10	14736	3.562	high molecular weight rhoptry protein 2
PF3D7_0929500	1180983	1181996	630	-	3	8425	13.373	conserved protein, unknown function
PF3D7_0930300	1201812	1206974	5163	+	1	147022	28.4761	merozoite surface protein 1
PF3D7_0930400.1	1207974	1211703	2748	+	8	8228	2.99418	zinc finger protein, putative
PF3D7_0930400.2	1207974	1211703	2748	+	8	8228	2.99418	zinc finger protein, putative
PF3D7_0930500	1212169	1216500	4083	-	2	13622	3.33627	diacylglycerol kinase, putative
PF3D7_0930600	1218393	1221000	1830	-	4	5587	3.05301	peptidyl-prolyl cis-trans isomerase
PF3D7_0931100	1254815	1257292	2478	+	1	14710	5.93624	nucleolar protein Nop52, putative
PF3D7_0931400	1263347	1264830	933	+	4	6204	6.64952	PUB domain-containing protein, putative
PF3D7_0931500	1264999	1266015	660	-	3	5095	7.7197	conserved Plasmodium protein, unknown function
PF3D7_0931800	1273082	1273930	849	-	1	6937	8.17079	proteasome subunit beta type-6, putative
PF3D7_0932000	1278007	1278896	309	+	5	1736	5.61812	conserved Plasmodium protein, unknown function
PF3D7_0932100	1279219	1283879	3825	-	5	13198	3.45046	protein MAM3, putative
PF3D7_0932200	1287008	1288372	516	+	4	6190	11.9961	profilin
PF3D7_0932400	1292117	1293643	1215	-	2	3358	2.76379	peptide chain release factor 1
PF3D7_0932600	1297285	1298239	744	-	2	2465	3.31317	apicoplast ribosomal protein S6, putative
PF3D7_0933300	1320345	1323293	2949	+	1	10083	3.41913	conserved Plasmodium protein, unknown function
PF3D7_0933400	1323893	1324699	807	+	1	3636	4.50558	conserved Plasmodium protein, unknown function
PF3D7_0933600	1331349	1332803	1455	-	1	4420	3.0378	mitochondrial-processing peptidase subunit beta, putative
PF3D7_0933700	1334115	1334794	555	-	2	1608	2.8973	conserved Plasmodium protein, unknown function
PF3D7_0933900	1338175	1339295	753	-	4	1920	2.5498	conserved Plasmodium protein, unknown function
PF3D7_0934200	1346858	1347295	438	-	1	1138	2.59817	conserved Plasmodium protein, unknown function
PF3D7_0934300	1348022	1348459	438	+	1	1115	2.54566	conserved Plasmodium protein, unknown function
PF3D7_0934400	1349790	1350392	603	+	1	1816	3.01161	AP2 domain transcription factor, putative
PF3D7_0934500	1350836	1351929	708	-	2	3553	5.01836	V-type proton ATPase subunit E, putative
PF3D7_0934600	1354581	1355495	567	+	3	1231	2.17108	conserved Plasmodium protein, unknown function
PF3D7_0934700	1357411	1359262	1596	+	3	10590	6.63534	UBX domain, putative
PF3D7_0934800	1361935	1363848	1029	+	5	5184	5.0379	cAMP-dependent protein kinase catalytic subunit
PF3D7_0935000	1366569	1367150	582	-	1	3675	6.31443	U2 small nuclear ribonucleoprotein B'', putative
PF3D7_0935100	1367396	1367614	219	-	1	1739	7.94064	protein kish, putative
PF3D7_0935200	1368594	1372037	3444	-	1	11701	3.3975	vacuolar protein sorting-associated protein 33, putative
PF3D7_0935300	1373018	1373722	366	+	4	739	2.01913	phosphatidylinositol N-acetylglucosaminyltransferase subunit P, putative
PF3D7_0935400	1377953	1379752	1800	+	1	3835	2.13056	gametocyte development protein 1
PF3D7_0935500	1400800	1402052	939	+	3	2425	2.58253	Plasmodium exported protein, unknown function
PF3D7_0936100	1430607	1431146	540	-	1	2604	4.82222	early transcribed membrane protein
PF3D7_1001000	63152	64032	696	+	2	1767	2.53879	Plasmodium exported protein (hyp12), unknown function
PF3D7_1001200	70547	70819	273	-	1	6866	25.1502	acyl-CoA binding protein, isoform 2, ACBP2
PF3D7_1001300	72934	73917	837	-	2	1721	2.05615	Plasmodium exported protein (PHISTa), unknown function
PF3D7_1001600	86538	89009	2292	-	2	20452	8.92321	exported lipase 2
PF3D7_1001700	92573	93526	801	-	2	7399	9.2372	Plasmodium exported protein (PHISTc), unknown function
PF3D7_1001800	96113	97031	783	-	2	1854	2.36782	Plasmodium exported protein (PHISTc), unknown function
PF3D7_1002200	112929	116015	2940	+	2	12922	4.39524	tryptophan-rich antigen 3
PF3D7_1002400.1	121115	123291	747	+	7	4114	5.50736	transformer-2 protein homolog beta, putative
PF3D7_1002400.2	121115	123291	741	+	7	4091	5.52092	transformer-2 protein homolog beta, putative
PF3D7_1002500	123770	124882	564	-	3	3158	5.59929	conserved Plasmodium protein, unknown function
PF3D7_1002600	125939	127600	1662	+	1	3523	2.11974	conserved Plasmodium protein, unknown function
PF3D7_1002900	138765	139853	384	+	5	2043	5.32031	conserved Plasmodium protein, unknown function
PF3D7_1003000	142419	146237	3819	+	1	8645	2.26368	conserved Plasmodium protein, unknown function
PF3D7_1003300	150416	150874	459	-	1	3029	6.59913	N-terminal acetyltransferase A complex catalytic subunit ARD1, putative
PF3D7_1003500	160316	160962	357	-	2	6981	19.5546	40S ribosomal protein S20e, putative
PF3D7_1004000	179344	180226	609	-	2	10364	17.0181	60S ribosomal protein L13, putative
PF3D7_1004200	187669	196954	9042	-	2	23920	2.64543	WD repeat-containing protein, putative
PF3D7_1004400	207000	209642	2643	-	1	9287	3.51381	RNA-binding protein, putative
PF3D7_1004500	213986	214594	609	-	1	1225	2.01149	conserved Plasmodium protein, unknown function
PF3D7_1004700	220018	221353	804	-	4	2305	2.86692	conserved Plasmodium protein, unknown function
PF3D7_1004900	224248	225207	960	+	1	3440	3.58333	conserved Plasmodium protein, unknown function
PF3D7_1005500	237506	242245	4740	-	1	11957	2.52257	regulator of nonsense transcripts 1, putative
PF3D7_1005600	244145	246535	2391	-	1	6292	2.63153	DnaJ protein, putative
PF3D7_1005800	251579	252490	681	+	2	1906	2.79883	conserved Plasmodium membrane protein, unknown function
PF3D7_1006200	262150	262997	324	-	3	6721	20.7438	DNA/RNA-binding protein Alba 3
PF3D7_1006600	272243	272824	582	-	1	2750	4.72509	phosducin-like protein, putative
PF3D7_1006700	274091	275426	1152	+	2	2721	2.36198	conserved Plasmodium protein, unknown function
PF3D7_1006800	277621	279168	741	+	4	4440	5.9919	single-strand telomeric DNA-binding protein GBP2, putative
PF3D7_1007100	286522	287473	351	-	4	2214	6.30769	conserved Plasmodium protein, unknown function
PF3D7_1007400	296906	297565	660	+	1	2639	3.99848	conserved Plasmodium protein, unknown function
PF3D7_1007500	298361	298687	327	+	1	1925	5.88685	conserved Plasmodium protein, unknown function
PF3D7_1007600	299280	299609	330	+	1	1084	3.28485	conserved Plasmodium protein, unknown function
PF3D7_1007900	316649	318280	1632	+	1	3945	2.41728	eukaryotic translation initiation factor 3 subunit D, putative
PF3D7_1008000	321011	328150	7140	+	1	40317	5.64664	histone deacetylase 2
PF3D7_1008100	331246	342807	11562	+	1	32436	2.8054	zinc finger protein, putative
PF3D7_1008300	346407	346514	108	+	1	226	2.09259	AP-5 complex subunit sigma-1, putative, pseudogene
PF3D7_1008400	347206	348667	1347	-	2	13869	10.2962	26S protease regulatory subunit 4, putative
PF3D7_1008500	351703	355593	3891	+	1	9027	2.31997	conserved Plasmodium membrane protein, unknown function
PF3D7_1008700	360625	362480	1338	-	3	6376	4.76532	tubulin beta chain
PF3D7_1008900	369199	370225	729	-	2	5319	7.2963	adenylate kinase
PF3D7_1009500	383044	384793	1128	-	4	2694	2.3883	metalloprotease, putative
PF3D7_1010100	403679	404575	897	+	1	2053	2.28874	PI31 domain-containing protein, putative
PF3D7_1010300	414732	415328	357	+	3	4070	11.4006	succinate dehydrogenase subunit 4, putative
PF3D7_1010400	415404	417471	1095	-	6	2770	2.52968	conserved Plasmodium protein, unknown function
PF3D7_1010600	420185	421056	669	-	2	7506	11.2197	eukaryotic translation initiation factor 2 subunit beta
PF3D7_1010700	422961	424365	672	+	7	3580	5.32738	dolichyl-phosphate-mannose--protein mannosyltransferase, putative
PF3D7_1011000	429204	430140	435	-	4	882	2.02759	inner membrane complex sub-compartment protein 1
PF3D7_1011400	441140	441955	816	-	1	3072	3.76471	proteasome subunit beta type-5
PF3D7_1011700	449154	450323	1170	+	1	3648	3.11795	DNA repair protein RAD23, putative
PF3D7_1011800	455398	458817	3420	+	1	80268	23.4702	PRE-binding protein
PF3D7_1012200	470979	471933	804	+	2	7159	8.90423	rhoptry associated adhesin
PF3D7_1012300	472546	473386	579	-	2	1893	3.26943	cytochrome b-c1 complex subunit 7, putative
PF3D7_1012400	475327	476563	696	-	3	39786	57.1638	hypoxanthine-guanine phosphoribosyltransferase
PF3D7_1012900	496331	497573	1143	-	2	6449	5.64217	autophagy-related protein 18, putative
PF3D7_1013200	511084	514278	3195	+	1	6778	2.12144	conserved Plasmodium protein, unknown function
PF3D7_1013300	515721	517607	1887	-	1	3820	2.02438	conserved Plasmodium protein, unknown function
PF3D7_1013500	526840	531448	4158	+	4	9154	2.20154	phosphoinositide-specific phospholipase C
PF3D7_1013800	542359	544779	1461	+	5	5182	3.54689	conserved Plasmodium protein, unknown function
PF3D7_1014300	565805	573060	7140	+	2	18449	2.58389	SPRY domain-containing protein, putative
PF3D7_1014600	581354	589090	7737	-	1	29804	3.85214	transcriptional coactivator ADA2
PF3D7_1014900	600970	607809	6840	-	1	14246	2.08275	conserved Plasmodium protein, unknown function
PF3D7_1015800	633682	635286	1008	+	5	4695	4.65774	ribonucleoside-diphosphate reductase small chain, putative
PF3D7_1015900	637138	639011	1341	+	2	10300	7.68084	enolase
PF3D7_1016300	650898	653567	2475	-	2	149704	60.4865	GBP130 protein
PF3D7_1016400	656709	659027	1830	-	3	5533	3.0235	serine/threonine protein kinase, FIKK family
PF3D7_1016900	682182	682508	327	-	1	3033	9.27523	early transcribed membrane protein 10.3
PF3D7_1017100	689888	690820	933	-	1	4202	4.50375	rhoptry neck protein 12
PF3D7_1017400	697970	699823	735	-	8	2599	3.53605	phosphomannomutase, putative
PF3D7_1017600	705537	708452	2916	+	1	15496	5.31413	conserved Plasmodium protein, unknown function
PF3D7_1017900	715878	717437	1404	+	2	5793	4.12607	26S proteasome regulatory subunit p55, putative
PF3D7_1018500	735921	736813	336	-	5	885	2.63393	pre-mRNA-splicing factor RDS3, putative
PF3D7_1018700	747028	748887	1860	+	1	7710	4.14516	conserved Plasmodium protein, unknown function
PF3D7_1019000	757795	765158	7218	+	2	24033	3.32959	eukaryotic translation initiation factor subunit eIF2A, putative
PF3D7_1019400	786503	787008	327	+	2	4796	14.6667	60S ribosomal protein L30e, putative
PF3D7_1019800	804328	807582	3255	-	1	14036	4.31214	tRNA methyltransferase, putative
PF3D7_1020000	811106	813484	969	-	10	2259	2.33127	RNA-binding protein 34, putative
PF3D7_1020900	845086	846192	546	-	5	6301	11.5403	ADP-ribosylation factor
PF3D7_1021000	848859	850404	1062	-	4	2208	2.0791	conserved Plasmodium protein, unknown function
PF3D7_1021200	857673	859742	2070	-	1	5524	2.6686	conserved Plasmodium protein, unknown function
PF3D7_1021500	867635	869677	2043	-	1	5229	2.55947	ATP-dependent RNA helicase ROK1, putative
PF3D7_1021800	896865	903608	6225	-	4	25270	4.05944	schizont egress antigen-1
PF3D7_1021900	905473	912345	6873	-	1	92169	13.4103	PHAX domain-containing protein, putative
PF3D7_1022000	919772	924213	4281	+	2	13095	3.05886	RNA-binding protein, putative
PF3D7_1022200	926831	929020	1890	-	3	4132	2.18624	conserved Plasmodium membrane protein, unknown function
PF3D7_1022400	939938	942234	1617	-	4	10935	6.76252	serine/arginine-rich splicing factor 4
PF3D7_1022700	951752	952579	828	-	1	1733	2.093	phospholipid scramblase, putative
PF3D7_1022800	955883	958357	2475	+	1	5945	2.40202	4-hydroxy-3-methylbut-2-en-1-yl diphosphate synthase (ferredoxin), putative
PF3D7_1022900	958939	959896	357	-	4	1048	2.93557	CDGSH iron-sulfur domain-containing protein, putative
PF3D7_1023300	984228	985330	240	-	4	874	3.64167	conserved Plasmodium protein, unknown function
PF3D7_1023400	985350	986988	588	+	7	1580	2.68707	HORMA domain protein, putative
PF3D7_1023500	987017	987310	294	-	1	2358	8.02041	conserved Plasmodium protein, unknown function
PF3D7_1023900	997475	1007461	9987	-	1	50386	5.04516	chromodomain-helicase-DNA-binding protein 1 homolog, putative
PF3D7_1024000	1014896	1016596	1701	+	1	5540	3.25691	conserved Plasmodium protein, unknown function
PF3D7_1024300	1022505	1022897	393	+	1	2523	6.41985	conserved Plasmodium protein, unknown function
PF3D7_1024500	1026120	1026914	795	+	1	1928	2.42516	conserved Plasmodium protein, unknown function
PF3D7_1024800	1034685	1039079	4395	+	1	12207	2.77747	exported protein 3
PF3D7_1025000	1045608	1049760	2943	-	7	9734	3.30751	EF-hand calcium-binding domain-containing protein, putative
PF3D7_1025600	1088214	1088417	204	+	1	1165	5.71078	cytochrome c oxidase copper chaperone, putative
PF3D7_1025700	1088931	1089494	564	+	1	2283	4.04787	conserved Plasmodium protein, unknown function
PF3D7_1025800	1089997	1090538	204	-	3	495	2.42647	conserved Plasmodium protein, unknown function
PF3D7_1025900	1091436	1097277	3996	-	15	8679	2.17192	conserved Plasmodium protein, unknown function
PF3D7_1026000	1098455	1099882	1092	-	3	9420	8.62637	conserved Plasmodium protein, unknown function
PF3D7_1026800	1122962	1124037	792	+	2	13796	17.4192	40S ribosomal protein S2
PF3D7_1027300	1140589	1142602	1182	-	3	35769	30.2614	peroxiredoxin
PF3D7_1027700.1	1150663	1151853	540	-	5	1663	3.07963	centrin-3
PF3D7_1027700.2	1150663	1151853	540	-	5	1663	3.07963	centrin-3
PF3D7_1027800	1153271	1154431	1161	-	1	19053	16.4109	60S ribosomal protein L3
PF3D7_1028300	1168010	1168957	948	-	1	3329	3.5116	rRNA-processing protein EBP2, putative
PF3D7_1028600	1176461	1177849	516	-	4	1104	2.13953	conserved Plasmodium protein, unknown function
PF3D7_1028800	1183487	1183995	354	-	2	1813	5.12147	conserved Plasmodium protein, unknown function
PF3D7_1029400	1200894	1202399	1506	-	1	3761	2.49734	LEM3/CDC50 family protein, putative
PF3D7_1029600	1206302	1207405	1104	+	1	6358	5.75906	adenosine deaminase
PF3D7_1029900	1217348	1222441	5094	+	1	21023	4.12701	conserved Plasmodium protein, unknown function
PF3D7_1030000	1223375	1224167	402	+	4	1182	2.9403	transcription elongation factor SPT4, putative
PF3D7_1030100	1224519	1229092	3873	-	4	8319	2.14795	pre-mRNA-splicing factor ATP-dependent RNA helicase PRP22, putative
PF3D7_1030500	1244215	1245396	1182	+	1	4866	4.11675	26S proteasome regulatory subunit RPN9, putative
PF3D7_1030800	1250045	1250683	639	+	1	2213	3.46322	calmodulin, putative
PF3D7_1031300	1260310	1263069	2760	+	1	5554	2.01232	conserved Plasmodium protein, unknown function
PF3D7_1031500	1270528	1274144	2754	+	6	5575	2.02433	DEAD/DEAH box helicase, putative
PF3D7_1031600	1275863	1278577	2715	+	1	10332	3.80552	conserved Plasmodium protein, unknown function
PF3D7_1031700	1281252	1281989	351	+	4	1080	3.07692	protein phosphatase inhibitor 3
PF3D7_1032700	1310421	1312082	1662	-	1	3454	2.07822	conserved Plasmodium protein, unknown function
PF3D7_1032800	1313255	1314721	930	-	4	1922	2.06667	leucine-rich repeat protein
PF3D7_1033100	1324132	1328436	4305	-	1	52975	12.3055	S-adenosylmethionine decarboxylase/ornithine decarboxylase
PF3D7_1033200	1335222	1336289	1068	+	1	4376	4.09738	early transcribed membrane protein 10.2
PF3D7_1033300	1338124	1338818	369	-	3	995	2.69648	conserved Plasmodium protein, unknown function
PF3D7_1033400	1339762	1340628	867	+	1	6397	7.37832	haloacid dehalogenase-like hydrolase
PF3D7_1033600	1344150	1346897	2748	-	1	9149	3.32933	pre-mRNA-splicing factor CEF1, putative
PF3D7_1033700	1348433	1350280	1467	+	3	3275	2.23245	bromodomain protein 1
PF3D7_1033900	1354454	1355571	576	-	5	2041	3.5434	ubiquitin-conjugating enzyme E2, putative
PF3D7_1034600	1376827	1377759	933	-	1	4697	5.0343	translation initiation factor IF-3, putative
PF3D7_1034900	1383450	1386119	2670	+	1	8052	3.01573	methionine--tRNA ligase
PF3D7_1035200	1394839	1396596	1758	+	1	28220	16.0523	S-antigen
PF3D7_1035400	1404195	1405259	1065	+	1	11118	10.4394	merozoite surface protein 3
PF3D7_1035500	1407276	1408391	1116	+	1	2700	2.41935	merozoite surface protein 6
PF3D7_1035900	1423983	1425683	1701	+	1	5020	2.95121	probable protein, unknown function
PF3D7_1036600.1	1444441	1445529	663	+	3	1827	2.75566	conserved Plasmodium protein, unknown function, unspecified product
PF3D7_1036600.2	1444441	1445529	663	+	3	1827	2.75566	conserved Plasmodium protein, unknown function, unspecified product
PF3D7_1036900	1452599	1458006	5046	-	3	37075	7.3474	conserved Plasmodium protein, unknown function
PF3D7_1037300	1477940	1478845	906	-	1	5077	5.60375	ADP/ATP transporter on adenylate translocase
PF3D7_1037700	1495973	1496658	318	+	3	1098	3.45283	enhancer of rudimentary homolog, putative
PF3D7_1037900	1502955	1504322	549	-	4	1579	2.87614	conserved Plasmodium protein, unknown function
PF3D7_1038000.1	1505835	1506896	360	+	4	27990	77.75	antigen UB05
PF3D7_1038000.2	1505835	1506896	363	+	4	27993	77.1157	antigen UB05
PF3D7_1039200	1576441	1576991	453	-	2	4439	9.79912	Plasmodium exported protein, unknown function, pseudogene
PF3D7_1101700	85629	86418	696	+	2	3058	4.39368	Pfmc-2TM Maurer's cleft two transmembrane protein
PF3D7_1102100	104300	104852	453	+	2	4433	9.78587	Plasmodium exported protein, unknown function, pseudogene
PF3D7_1102700	128789	129064	276	+	1	1002	3.63043	early transcribed membrane protein 11.1
PF3D7_1102800	131703	131987	285	-	1	2609	9.15439	early transcribed membrane protein 11.2
PF3D7_1103100	140048	140801	357	-	2	16321	45.7171	60S acidic ribosomal protein P1, putative
PF3D7_1103400	146427	150815	4389	+	1	9603	2.18797	FeS cluster assembly protein SufD
PF3D7_1103900	175248	175433	186	+	1	727	3.9086	conserved Plasmodium protein, unknown function
PF3D7_1104100	179461	181128	1044	-	4	4568	4.37548	syntaxin, Qa-SNARE family
PF3D7_1104200	182383	187223	4281	-	5	12507	2.92151	chromatin remodeling protein
PF3D7_1104300	190800	194358	3426	-	2	7065	2.06217	conserved Plasmodium protein, unknown function
PF3D7_1104400	196767	198355	1275	+	2	13150	10.3137	thioredoxin, putative
PF3D7_1105000	221818	222129	312	-	1	207095	663.766	histone H4
PF3D7_1105100	226065	226418	354	+	1	216747	612.28	histone H2B
PF3D7_1105400	235597	237097	786	-	2	11856	15.084	40S ribosomal protein S4, putative
PF3D7_1105500	239687	240613	516	+	3	2162	4.18992	centrin-4
PF3D7_1105800	250918	252872	801	+	9	4147	5.17728	conserved Apicomplexan protein, unknown function
PF3D7_1106100	258779	259981	810	+	4	2558	3.15802	apicoplast ribosomal protein S15 precursor, putative
PF3D7_1106200	260867	263331	2046	+	3	4100	2.00391	conserved Plasmodium protein, unknown function
PF3D7_1106300	263604	266570	2202	-	7	4801	2.18029	exonuclease, putative
PF3D7_1106400	267547	267897	351	+	1	1017	2.89744	conserved Plasmodium protein, unknown function
PF3D7_1107200	297823	300734	2142	+	8	4686	2.18768	conserved Plasmodium protein, unknown function
PF3D7_1107300	301283	311287	10005	-	1	63150	6.31184	polyadenylate-binding protein-interacting protein 1, putative
PF3D7_1108000	352556	354262	1707	+	1	6405	3.7522	IWS1-like protein, putative
PF3D7_1108300	362421	362887	324	+	2	938	2.89506	pterin-4a-carbinolamine dehydratase
PF3D7_1108400	365093	366100	1008	+	1	9926	9.84722	casein kinase 2, alpha subunit
PF3D7_1108600	369675	370706	1032	-	1	40435	39.1812	endoplasmic reticulum-resident calcium binding protein
PF3D7_1108700	373238	374860	1623	-	1	8072	4.97351	heat shock protein J2
PF3D7_1109400	390644	393331	1311	-	6	4049	3.08848	essential nuclear protein 1, putative
PF3D7_1109500	391061	391145	85	-	1	712	8.37647	small nucleolar RNA snoR09
PF3D7_1109700	392510	392712	203	-	1	545	2.68473	small nucleolar RNA snoR11
PF3D7_1109900	397124	397775	339	+	2	8759	25.8378	60S ribosomal protein L36
PF3D7_1110000	398659	399226	249	+	2	499	2.00402	conserved Plasmodium protein, unknown function
PF3D7_1110300	410202	411355	666	-	4	2144	3.21922	conserved Plasmodium protein, unknown function
PF3D7_1110400	414797	419556	4452	+	3	30162	6.77493	RNA-binding protein, putative
PF3D7_1110600	425904	426864	537	-	5	2253	4.19553	mitochondrial ribosomal protein L11 precursor, putative
PF3D7_1110800	430157	431476	606	-	7	1404	2.31683	conserved Plasmodium protein, unknown function
PF3D7_1110900	431906	433645	1740	-	1	4165	2.39368	ES2 protein, putative
PF3D7_1111100	437171	438220	1050	-	1	5788	5.51238	replication factor C subunit 5, putative
PF3D7_1111300	442959	443828	870	-	1	2029	2.33218	SNARE protein, putative
PF3D7_1111400	445233	445799	567	-	1	4042	7.12875	conserved Plasmodium protein, unknown function
PF3D7_1112100	462290	469672	7383	+	1	31113	4.21414	conserved Plasmodium protein, unknown function
PF3D7_1112400	475880	476455	576	+	1	2472	4.29167	nucleic acid binding protein, putative
PF3D7_1113100	511105	511761	657	-	1	10296	15.6712	protein tyrosine phosphatase
PF3D7_1113200	517311	517985	390	+	2	813	2.08462	conserved Plasmodium protein, unknown function
PF3D7_1113300	519189	520220	1032	+	1	4148	4.01938	UDP-galactose transporter, putative
PF3D7_1113400	521122	522824	1167	-	4	3060	2.62211	ubiquitin domain-containing protein DSK2, putative
PF3D7_1113600	527572	528702	1131	+	1	2289	2.02387	conserved Plasmodium protein, unknown function
PF3D7_1113800	531177	533285	2109	-	1	8393	3.97961	conserved Plasmodium membrane protein, unknown function
PF3D7_1114100.1	539903	541387	837	+	4	1936	2.31302	rhomboid protease ROM1
PF3D7_1114100.2	539903	541387	831	+	4	1932	2.32491	rhomboid protease ROM1
PF3D7_1114700	555514	558668	2100	+	9	8152	3.8819	serine/threonine protein kinase, putative
PF3D7_1115000	570017	570714	438	+	3	1652	3.77169	conserved Plasmodium protein, unknown function
PF3D7_1115200	576773	580276	2382	+	7	6633	2.78463	histone-lysine N-methyltransferase SET7
PF3D7_1115400	584328	585806	1479	-	1	10045	6.79175	cysteine proteinase falcipain 3
PF3D7_1115500	588169	589400	696	+	4	2227	3.19971	AP2 domain transcription factor, putative
PF3D7_1115600	589707	590629	588	-	3	9551	16.2432	peptidyl-prolyl cis-trans isomerase
PF3D7_1115700	592130	593584	1455	-	1	4791	3.29278	cysteine proteinase falcipain 2a
PF3D7_1116100	607902	613394	5493	-	1	28907	5.26252	serine esterase, putative
PF3D7_1116300	618312	619778	504	+	6	1723	3.41865	peptidyl-prolyl cis-trans isomerase
PF3D7_1116400	619893	621350	1458	-	1	3015	2.0679	guanine nucleotide-exchange factor SEC12
PF3D7_1116500	624370	625737	1368	+	1	2888	2.11111	folate transporter 2
PF3D7_1116700	630779	632881	2103	-	1	15517	7.37851	dipeptidyl aminopeptidase 1
PF3D7_1116800	636094	639511	2721	-	4	9655	3.54833	heat shock protein 101
PF3D7_1117300	662000	662386	387	+	1	1427	3.68734	conserved Plasmodium protein, unknown function
PF3D7_1117700	670711	671515	645	-	2	26739	41.4558	GTP-binding nuclear protein RAN/TC4
PF3D7_1118100	687235	687781	468	+	2	938	2.00427	AP-1 complex subunit sigma, putative
PF3D7_1118500	703175	704959	1785	+	1	4781	2.67843	nucleolar protein 56, putative
PF3D7_1118900	716795	718412	747	+	7	1743	2.33333	conserved Plasmodium protein, unknown function
PF3D7_1119000	718650	719765	1116	-	1	5847	5.23925	acyl-CoA-binding protein, putative
PF3D7_1119100	720992	722273	975	+	4	3427	3.51487	tRNA m(1)G methyltransferase, putative
PF3D7_1119200	722717	723289	453	-	2	1150	2.53863	conserved protein, unknown function
PF3D7_1119300	724855	725739	885	-	1	3793	4.28588	splicing factor U2AF small subunit, putative
PF3D7_1119800	746854	747456	603	-	1	1816	3.01161	alternative splicing factor ASF-1, putative
PF3D7_1120000	756192	760435	3213	+	6	23936	7.44974	conserved Plasmodium protein, unknown function
PF3D7_1120100	761695	762818	753	+	3	8282	10.9987	phosphoglycerate mutase, putative
PF3D7_1120200	765033	765625	252	+	2	669	2.65476	conserved Plasmodium protein, unknown function
PF3D7_1120500	772539	775042	2376	+	2	5823	2.45076	tRNA nucleotidyltransferase, putative
PF3D7_1120900	790267	790608	342	+	1	881	2.57602	heat shock factor-binding protein 1
PF3D7_1121100	794254	799561	4635	-	4	15560	3.35707	conserved Plasmodium protein, unknown function
PF3D7_1121600	815386	816322	489	-	3	40651	83.1309	exported protein 1
PF3D7_1122300	846929	848014	1086	+	1	2391	2.20166	conserved Plasmodium protein, unknown function
PF3D7_1122700	868388	869152	765	-	1	3156	4.12549	conserved Plasmodium protein, unknown function
PF3D7_1123000	895967	903370	7404	-	1	31031	4.19111	conserved Plasmodium protein, unknown function
PF3D7_1123100	909366	916324	6798	+	2	19401	2.85393	calcium-dependent protein kinase 7
PF3D7_1123300	921823	923892	2070	+	1	5105	2.46618	RING zinc finger protein, putative
PF3D7_1123700	938950	939612	453	+	2	1059	2.33775	mitochondrial ribosomal protein L37, putative
PF3D7_1123800	940527	944333	3807	+	1	12347	3.24324	structural maintenance of chromosomes protein 5, putative
PF3D7_1123900	945470	946148	438	+	3	2423	5.53196	13 kDa ribonucleoprotein-associated protein, putative
PF3D7_1124000	948591	950707	1398	+	5	3798	2.71674	endoplasmic reticulum oxidoreductin, putative
PF3D7_1124100	951382	956343	4962	-	1	15308	3.08505	beige/BEACH domain protein, putative
PF3D7_1124300	962156	963958	1578	+	3	3835	2.43029	conserved Plasmodium protein, unknown function
PF3D7_1124400	964675	965360	444	-	3	1702	3.83333	U6 snRNA-associated Sm-like protein LSm1, putative
PF3D7_1124600	970105	971376	1272	-	1	6885	5.41274	ethanolamine kinase
PF3D7_1124700	974493	975538	906	-	2	4071	4.49338	GrpE protein homolog, mitochondrial, putative
PF3D7_1124800	976880	977936	741	-	3	8234	11.112	ribosome biogenesis regulatory protein, putative
PF3D7_1124900	981945	983086	375	+	4	7041	18.776	60S ribosomal protein L35, putative
PF3D7_1125100	986630	988120	1491	+	1	4028	2.70154	conserved Apicomplexan protein, unknown function
PF3D7_1125400	997923	999547	1413	-	2	5961	4.21868	mitochondrial import inner membrane translocase subunit TIM44, putative
PF3D7_1125500	1001182	1001562	381	-	1	1795	4.71129	small nuclear ribonucleoprotein Sm D1, putative
PF3D7_1125600	1003226	1003694	252	-	2	708	2.80952	conserved Plasmodium protein, unknown function
PF3D7_1125900	1013466	1013747	282	+	1	1040	3.68794	conserved Plasmodium protein, unknown function
PF3D7_1126000	1014334	1017375	3042	-	1	6406	2.10585	threonine--tRNA ligase
PF3D7_1126200	1023790	1024496	471	-	2	8165	17.3355	40S ribosomal protein S18, putative
PF3D7_1126300	1026976	1029544	1854	+	5	4648	2.50701	DnaJ protein, putative
PF3D7_1126900	1053642	1054333	261	-	4	733	2.80843	small nuclear ribonucleoprotein F, putative
PF3D7_1127100	1060262	1060783	522	-	1	5346	10.2414	deoxyuridine 5'-triphosphate nucleotidohydrolase
PF3D7_1128000.1	1087314	1093105	5370	+	4	12138	2.26034	conserved Plasmodium protein, unknown function
PF3D7_1128000.2	1087314	1093105	5331	+	4	12060	2.26224	conserved Plasmodium protein, unknown function
PF3D7_1128100	1094909	1095931	747	-	3	4744	6.35074	prefoldin subunit 5, putative
PF3D7_1128200	1097117	1097527	411	+	1	1649	4.01217	multiprotein-bridging factor 1, putative
PF3D7_1128400	1104216	1106505	1131	-	11	2778	2.45623	geranylgeranyl pyrophosphate synthase, putative
PF3D7_1129000	1121930	1123377	966	+	4	7080	7.32919	spermidine synthase
PF3D7_1129100	1125952	1127310	1359	+	1	13775	10.1361	parasitophorous vacuolar protein 1
PF3D7_1129200	1128774	1130813	1182	+	4	8230	6.96277	26S proteasome regulatory subunit RPN7, putative
PF3D7_1129400	1138075	1139979	1905	-	1	4962	2.60472	rRNA (cytosine-C(5))-methyltransferase, putative
PF3D7_1129700	1149976	1150518	543	-	1	1362	2.50829	conserved Plasmodium protein, unknown function
PF3D7_1129800	1152379	1153227	849	+	1	2240	2.6384	conserved Plasmodium protein, unknown function
PF3D7_1130100	1163094	1163357	264	-	1	9852	37.3182	60S ribosomal protein L38
PF3D7_1130200	1165221	1166171	951	+	1	24189	25.4353	60S ribosomal protein P0
PF3D7_1130300	1166588	1166687	100	+	1	919	9.19	small nucleolar RNA snoR13
PF3D7_1130310	1166812	1166914	103	+	1	506	4.91262	small nucleolar RNA snoR14a
PF3D7_1130400	1168879	1170198	1320	+	1	3978	3.01364	26S protease regulatory subunit 6A, putative
PF3D7_1130500	1171680	1175724	2958	+	7	8270	2.79581	conserved oligomeric Golgi complex subunit 2, putative
PF3D7_1130700	1180160	1185616	5457	-	1	22644	4.14953	structural maintenance of chromosomes protein 1, putative
PF3D7_1131000	1194524	1195036	513	-	1	1062	2.07018	RNA-binding protein s1, putative
PF3D7_1131100	1195988	1198309	2322	-	1	5751	2.47674	serpentine receptor, putative
PF3D7_1131200	1199253	1201805	1146	+	6	4135	3.6082	conserved Plasmodium protein, unknown function
PF3D7_1132200	1248310	1250232	1635	-	2	6601	4.03731	T-complex protein 1 subunit alpha
PF3D7_1132300	1253073	1253894	822	+	1	3824	4.65207	nucleic acid binding protein, putative
PF3D7_1132400	1255286	1259671	4386	-	1	12506	2.85135	conserved Plasmodium membrane protein, unknown function
PF3D7_1132600	1266250	1267584	1161	-	2	5216	4.49268	pre-mRNA-splicing factor 38A, putative
PF3D7_1132800	1271204	1271980	777	+	1	3604	4.63835	aquaglyceroporin
PF3D7_1133000	1275574	1275663	90	+	1	363	4.03333	conserved Plasmodium protein, unknown function
PF3D7_1133200	1281284	1287633	6219	-	2	44459	7.1489	conserved Plasmodium protein, unknown function
PF3D7_1133300	1290501	1291601	1101	+	1	2522	2.29064	LEM3/CDC50 family protein, putative
PF3D7_1133800	1309024	1311793	2574	+	2	9007	3.49922	RNA (uracil-5-)methyltransferase, putative
PF3D7_1134000	1320114	1322105	1992	+	1	5984	3.00402	heat shock protein 70
PF3D7_1134100	1323043	1324314	1272	-	1	4067	3.19733	protein disulfide isomerase
PF3D7_1134300	1333536	1340219	6684	+	1	16694	2.49761	conserved Plasmodium protein, unknown function
PF3D7_1134400	1340486	1341680	525	-	6	1084	2.06476	conserved Plasmodium protein, unknown function
PF3D7_1134500	1344303	1349763	5235	+	2	16717	3.19331	alpha/beta hydrolase, putative
PF3D7_1134800	1367186	1368809	1464	+	2	3301	2.25478	coatomer subunit delta
PF3D7_1135400	1384378	1385115	738	-	1	2281	3.09079	conserved Plasmodium protein, unknown function
PF3D7_1135700	1396433	1396764	225	-	2	1265	5.62222	conserved Plasmodium protein, unknown function
PF3D7_1135800	1397506	1397985	480	+	1	1138	2.37083	conserved Plasmodium protein, unknown function
PF3D7_1135900	1398486	1400601	891	-	10	7477	8.39169	3-oxo-5-alpha-steroid 4-dehydrogenase, putative
PF3D7_1136300	1422744	1426201	3297	+	2	21585	6.54686	tudor staphylococcal nuclease
PF3D7_1136400	1427011	1429671	2661	-	1	9948	3.73844	signal recognition particle subunit SRP72, putative
PF3D7_1136500.1	1433141	1435170	972	-	8	5659	5.82202	casein kinase 1
PF3D7_1136500.2	1431881	1435170	975	-	9	4634	4.75282	casein kinase 1
PF3D7_1136700.1	1446489	1448505	1266	+	7	2822	2.22907	conserved Plasmodium protein, unknown function
PF3D7_1136700.2	1446489	1448505	1206	+	6	2700	2.23881	conserved Plasmodium protein, unknown function
PF3D7_1137000	1461301	1461498	198	-	1	1081	5.4596	U2 spliceosomal RNA
PF3D7_1137100	1462168	1463070	903	+	1	2691	2.98007	mitochondrial ribosomal protein S9 precursor, putative
PF3D7_1137300	1466197	1468266	2070	-	1	8386	4.05121	CLPTM1 domain-containing protein, putative
PF3D7_1137500	1473505	1474116	519	-	2	2248	4.33141	apicoplast ribosomal protein S14p/S29e precursor, putative
PF3D7_1138500	1518464	1521238	2775	+	1	5844	2.10595	protein phosphatase PPM2
PF3D7_1139900	1593966	1594951	597	+	4	1450	2.42881	conserved protein, unknown function
PF3D7_1140100	1598550	1599632	387	-	4	1153	2.97933	V-type proton ATPase subunit F, putative
PF3D7_1140200	1601257	1603078	1344	-	2	10921	8.12574	conserved Plasmodium protein, unknown function
PF3D7_1140400	1608006	1608609	504	+	2	1128	2.2381	conserved Plasmodium protein, unknown function
PF3D7_1141300	1659070	1662359	3039	-	2	11337	3.7305	conserved Plasmodium protein, unknown function
PF3D7_1141400	1663621	1665250	1062	+	5	6817	6.41902	phosphatidylinositol N-acetylglucosaminyltransferase subunit H, putative
PF3D7_1142100	1681868	1690084	8217	-	1	23462	2.8553	conserved Plasmodium protein, unknown function
PF3D7_1142500	1705696	1706573	384	-	3	3303	8.60156	60S ribosomal protein L28
PF3D7_1142600	1708066	1708679	423	-	2	15526	36.7045	60S ribosomal protein L35ae, putative
PF3D7_1142800	1713081	1713974	894	+	1	2530	2.82998	conserved Plasmodium protein, unknown function
PF3D7_1143200	1729793	1730899	966	+	2	4632	4.79503	DnaJ protein, putative
PF3D7_1143300	1731899	1732900	1002	-	1	3226	3.21956	DNA-directed RNA polymerases I and III subunit RPAC1, putative
PF3D7_1143400	1735126	1736572	468	+	6	1660	3.54701	translation initiation factor eIF-1A, putative
PF3D7_1143500	1737256	1740029	2637	-	2	5683	2.1551	conserved Plasmodium protein, unknown function
PF3D7_1144000	1755438	1755935	249	+	2	5509	22.1245	40S ribosomal protein S21
PF3D7_1144100	1756557	1757182	372	-	3	982	2.63978	mitochondrial large subunit ribosomal protein, putative
PF3D7_1144300	1759257	1759922	120	-	2	4773	39.775	60S ribosomal protein L41
PF3D7_1144700	1772350	1773819	780	-	5	1835	2.35256	apicoplast import protein Tic20, putative
PF3D7_1144900	1777525	1778928	624	-	4	1995	3.19712	ras-related protein Rab-6
PF3D7_1145200	1789323	1795370	6048	-	1	16005	2.64633	serine/threonine protein kinase, putative
PF3D7_1145300	1798776	1799670	264	-	4	1022	3.87121	cysteine-rich PDZ-binding protein, putative
PF3D7_1147300	1883775	1887860	4086	+	1	12529	3.06632	conserved Plasmodium protein, unknown function
PF3D7_1147400	1888637	1889139	234	-	2	938	4.00855	conserved Plasmodium protein, unknown function
PF3D7_1147700	1897204	1897884	465	+	3	2653	5.70538	ATP synthase subunit delta, mitochondrial, putative
PF3D7_1147900	1907055	1907708	654	-	1	2456	3.75535	conserved Plasmodium protein, unknown function
PF3D7_1148000	1909210	1913499	4290	-	1	11755	2.74009	serine/threonine protein kinase, putative
PF3D7_1148200	1920268	1920811	544	+	1	15633	28.7371	unspecified product
PF3D7_1148500	1922656	1922928	273	+	1	233373	854.846	unspecified product
PF3D7_1149000	1950210	1968726	18282	+	2	52055	2.84734	antigen 332, DBL-like protein
PF3D7_1149100.1	1972400	1973874	1353	+	2	29629	21.8987	Plasmodium exported protein, unknown function
PF3D7_1149100.2	1972400	1973874	1350	+	2	29627	21.9459	Plasmodium exported protein, unknown function
PF3D7_1149400	1985870	1986639	630	-	2	5709	9.0619	Plasmodium exported protein, unknown function
PF3D7_1201000	76846	79067	1962	-	2	12412	6.3262	Plasmodium exported protein (PHISTb), unknown function
PF3D7_1201900	107338	108202	624	-	2	2521	4.04006	conserved protein, unknown function
PF3D7_1202100.1	113787	115923	1206	+	7	3159	2.6194	SRAP domain-containing protein, putative
PF3D7_1202100.2	113787	115923	1203	+	7	3159	2.62594	SRAP domain-containing protein, putative
PF3D7_1202200	116475	117449	975	-	1	2040	2.09231	mitochondrial phosphate carrier protein
PF3D7_1202600	148238	155478	6543	-	6	16906	2.58383	conserved protein, unknown function
PF3D7_1202800	160716	161255	291	+	3	688	2.36426	conserved Plasmodium protein, unknown function
PF3D7_1202900	162429	162722	294	-	1	14871	50.5816	high mobility group protein B1
PF3D7_1203000	167706	171275	3570	+	1	9674	2.7098	origin recognition complex subunit 1
PF3D7_1203100	171507	172136	513	-	2	2680	5.22417	conserved Plasmodium protein, unknown function
PF3D7_1203200	172936	173361	315	+	2	803	2.54921	signal recognition particle subunit SRP14
PF3D7_1203400	178162	181914	3753	+	1	13062	3.48042	major facilitator superfamily domain-containing protein, putative
PF3D7_1203600	184914	185768	555	+	3	1284	2.31351	cytochrome c1 heme lyase, putative
PF3D7_1203700	187146	188842	1044	-	3	17707	16.9607	nucleosome assembly protein
PF3D7_1203900	194144	195462	444	+	5	1054	2.37387	ubiquitin-conjugating enzyme E2
PF3D7_1204300	205491	205976	486	-	1	15905	32.7263	eukaryotic translation initiation factor 5A
PF3D7_1204500	211517	212356	840	-	1	1994	2.37381	conserved Plasmodium protein, unknown function
PF3D7_1205600	249336	251399	1002	-	8	5518	5.50699	tetratricopeptide repeat protein, putative
PF3D7_1205700	253155	254123	969	+	1	2449	2.52735	targeted glyoxalase II
PF3D7_1205800	256367	263731	6855	+	4	29015	4.23268	high mobility group protein B3, putative
PF3D7_1206000	270300	271214	915	-	1	2918	3.18907	shewanella-like protein phosphatase 2
PF3D7_1206200	275744	279336	2955	-	3	15680	5.30626	eukaryotic translation initiation factor 3 subunit C, putative
PF3D7_1206700	301129	302826	1698	-	1	13177	7.76031	eukaryotic translation initiation factor 5, putative
PF3D7_1207000	313869	321908	7839	-	3	24215	3.08904	conserved Plasmodium protein, unknown function
PF3D7_1207100	324336	326858	2523	-	1	13135	5.2061	small subunit rRNA processing factor, putative
PF3D7_1208300	388545	389147	474	+	2	4727	9.97257	mitochondrial ACP precursor, putative
PF3D7_1208600	402300	402527	228	+	1	790	3.46491	mitochondrial import inner membrane translocase subunit TIM10, putative
PF3D7_1208700	403350	404814	1197	+	3	3272	2.7335	conserved protein, unknown function
PF3D7_1208900	415404	419732	4329	+	1	10070	2.32617	protein phosphatase PPM11, putative
PF3D7_1209000	421371	422201	504	-	2	1270	2.51984	conserved Plasmodium protein, unknown function
PF3D7_1209300	428495	432880	4386	-	1	9185	2.09416	telomere repeat-binding zinc finger protein
PF3D7_1209800	447381	447950	570	-	1	2558	4.48772	ATP synthase mitochondrial F1 complex assembly factor 1, putative
PF3D7_1210000	452595	453828	1020	+	2	4019	3.9402	50S ribosomal protein L1, apicoplast, putative
PF3D7_1210100	455304	456236	933	-	1	2820	3.02251	syntaxin, Qa-SNARE family
PF3D7_1211200	491893	497388	5496	-	1	11282	2.05277	conserved Plasmodium protein, unknown function
PF3D7_1211400	505344	506662	735	+	4	3781	5.14422	heat shock protein DNAJ homologue Pfj4
PF3D7_1211600	510323	519437	8886	+	2	18877	2.12435	lysine-specific histone demethylase 1, putative
PF3D7_1211800	526109	527780	1146	+	2	24001	20.9433	polyubiquitin
PF3D7_1212000	534912	535915	618	-	3	2760	4.46602	glutathione peroxidase-like thioredoxin peroxidase
PF3D7_1212100	536951	538627	1677	+	1	8735	5.20871	peripheral plastid protein 1, putative
PF3D7_1212600.1	555820	556762	456	-	4	1370	3.00439	conserved protein, unknown function, unspecified product
PF3D7_1212600.2	556085	556762	279	-	3	603	2.16129	conserved protein, unknown function, unspecified product
PF3D7_1212700	558047	562180	4134	-	1	27493	6.65046	eukaryotic translation initiation factor 3 subunit A, putative
PF3D7_1212800	565966	566931	966	+	1	2291	2.37164	iron-sulfur subunit of succinate dehydrogenase
PF3D7_1212900	568569	571835	3267	-	1	14560	4.45669	bromodomain protein 2, putative
PF3D7_1213100	576417	576580	164	-	1	368	2.2439	U1 spliceosomal RNA
PF3D7_1213600	586809	587090	282	+	1	1773	6.28723	dynein light chain 1, putative
PF3D7_1214000	600954	601564	441	-	2	1342	3.04308	conserved Plasmodium protein, unknown function
PF3D7_1214900	618764	620111	738	+	5	1942	2.63144	conserved Plasmodium membrane protein, unknown function
PF3D7_1215100	623126	626273	2862	+	2	6120	2.13836	conserved Plasmodium protein, unknown function
PF3D7_1215300	629009	629667	312	-	3	787	2.52244	10 kDa chaperonin
PF3D7_1215600	635035	635457	423	+	1	1031	2.43735	conserved Plasmodium protein, unknown function
PF3D7_1216000	644539	646395	1857	+	1	6894	3.71244	serine--tRNA ligase, putative
PF3D7_1216200	648889	650552	1104	+	5	3272	2.96377	glycerol-3-phosphate dehydrogenase [NAD(+)], putative
PF3D7_1216300	651398	651856	459	-	1	3021	6.5817	signal recognition particle subunit SRP19
PF3D7_1216400	653670	656435	2766	+	1	8653	3.12834	conserved Plasmodium membrane protein, unknown function
[truncated: 657 more rows]

## Sheet: trophozoite stage in vitro-26
Gene	start	end	Length	strand	num_exons	Reads	Load	Description
[truncated: 523 more rows]
