# Supplementary material for: RNA Secondary Structurome Revealed Distinct Thermoregulation in Plasmodium falciparum
Source: Front Cell Dev Biol. 2022 Jan 4;9:766532. doi: 10.3389/fcell.2021.766532 (PMC8763798; doi:10.3389/fcell.2021.766532)
Supplement: Supplementary file 8 [file Table5.XLSX]

## Sheet: summary
	5'UTR				ATG				3'UTR
	length	mapped in icSHAPE	%	coverage	length	mapped in icSHAPE	%	coverage	length	mapped in icSHAPE	%	coverage
PF3D7_0112300. S1-18s	1184	484	40.88	0.52	2149	2119	98.6	122.9	200	98	49	0.34
PF3D7_0531600 .A2-18s	1042	747	71.69	8.3	2092	2092	100	5974	200	199	99.5	6.4
PF3D7_0725600. A1-18s	1145	539	47.07	7.14	2087	1049	50.26	1482	200	179	89.5	12.27
PF3D7_1148600. S2-18s	1318	130	9.86	0.61	7209	194	2.69	1.547	200	0	0	0
PF3D7_1371000. S2-18s	1318	1108	84.07	2.17	2151	2148	99.86	165.3	200	186	93	1.02

## Sheet: PF3D7_0112300. S1-18s
						raw read						icSHAPE scores
Chromsome	Pos	Base	5-UTR	ATG	3-UTR	SHLR-1	SHLR-2	SHLR-3	SHLR-4	SHLR-5	SHLR-6	late 37 in vivo	late 37 in vitro	late 26 in vivo	late 26 in vitro	Gene_t	Triscription_ID	Chr	Gene.sta	Gene.end	Name	Description	Description.1	Size	Parent_gene
Pf3D7_01_v3	472470	A	-1269			0	0	0	0	0	0	1	1	1	1	NA	NA	NA	NA	NA	NA	NA	NA	NA	NA
Pf3D7_01_v3	472472	T	-1267			0	0	0	0	0	0	1	1	1	1	NA	NA	NA	NA	NA	NA	NA	NA	NA	NA
Pf3D7_01_v3	472474	T	-1265			0	0	0	0	0	0	1	1	1	1	NA	NA	NA	NA	NA	NA	NA	NA	NA	NA
Pf3D7_01_v3	472475	C	-1264			0	0	0	0	0	0	1	1	1	1	NA	NA	NA	NA	NA	NA	NA	NA	NA	NA
Pf3D7_01_v3	472478	A	-1261			0	0	0	0	0	0	1	1	1	1	NA	NA	NA	NA	NA	NA	NA	NA	NA	NA
Pf3D7_01_v3	472479	A	-1260			0	0	0	0	0	0	1	1	1	1	NA	NA	NA	NA	NA	NA	NA	NA	NA	NA
Pf3D7_01_v3	472484	A	-1255			0	0	0	0	0	0	1	1	1	1	NA	NA	NA	NA	NA	NA	NA	NA	NA	NA
Pf3D7_01_v3	472485	A	-1254			0	0	0	0	0	0	1	1	1	1	NA	NA	NA	NA	NA	NA	NA	NA	NA	NA
Pf3D7_01_v3	472488	T	-1251			0	0	0	0	0	0	1	1	1	1	NA	NA	NA	NA	NA	NA	NA	NA	NA	NA
Pf3D7_01_v3	472500	T	-1239			0	0	0	0	0	0	1	1	1	1	NA	NA	NA	NA	NA	NA	NA	NA	NA	NA
Pf3D7_01_v3	472501	A	-1238			0	0	0	0	0	0	1	1	1	1	NA	NA	NA	NA	NA	NA	NA	NA	NA	NA
Pf3D7_01_v3	472507	A	-1232			0	0	0	0	0	0	1	1	1	1	NA	NA	NA	NA	NA	NA	NA	NA	NA	NA
Pf3D7_01_v3	472516	T	-1223			0	0	0	0	0	0	1	1	1	1	NA	NA	NA	NA	NA	NA	NA	NA	NA	NA
Pf3D7_01_v3	472520	A	-1219			0	0	0	0	0	0	1	1	1	1	NA	NA	NA	NA	NA	NA	NA	NA	NA	NA
Pf3D7_01_v3	472527	A	-1212			0	0	0	0	0	0	1	1	1	1	NA	NA	NA	NA	NA	NA	NA	NA	NA	NA
Pf3D7_01_v3	472529	C	-1210			0	0	0	0	0	0	1	1	1	1	NA	NA	NA	NA	NA	NA	NA	NA	NA	NA
Pf3D7_01_v3	472531	T	-1208			0	0	0	0	0	0	1	1	1	1	NA	NA	NA	NA	NA	NA	NA	NA	NA	NA
Pf3D7_01_v3	472532	A	-1207			0	0	0	0	0	0	1	1	1	1	NA	NA	NA	NA	NA	NA	NA	NA	NA	NA
Pf3D7_01_v3	472535	T	-1204			0	0	0	0	0	0	1	1	1	1	NA	NA	NA	NA	NA	NA	NA	NA	NA	NA
Pf3D7_01_v3	472545	T	-1194			0	0	0	0	0	0	1	1	1	1	NA	NA	NA	NA	NA	NA	NA	NA	NA	NA
Pf3D7_01_v3	472547	T	-1192			0	0	0	0	0	0	1	1	1	1	NA	NA	NA	NA	NA	NA	NA	NA	NA	NA
Pf3D7_01_v3	472548	A	-1191			0	0	0	0	0	0	1	1	1	1	NA	NA	NA	NA	NA	NA	NA	NA	NA	NA
Pf3D7_01_v3	472552	T	-1187			0	0	0	0	0	0	1	1	1	1	NA	NA	NA	NA	NA	NA	NA	NA	NA	NA
Pf3D7_01_v3	472553	T	-1186			0	0	0	0	0	0	1	1	1	1	NA	NA	NA	NA	NA	NA	NA	NA	NA	NA
Pf3D7_01_v3	472554	A	-1185			0	0	0	0	1	0	1	1	0.796748	0.796748	NA	NA	NA	NA	NA	NA	NA	NA	NA	NA
Pf3D7_01_v3	472555	T	-1184			0	0	0	0	1	1	1	1	0.796748	0.991657	NA	NA	NA	NA	NA	NA	NA	NA	NA	NA
Pf3D7_01_v3	472556	G	-1183			0	0	0	0	0	0	1	1	1	1	NA	NA	NA	NA	NA	NA	NA	NA	NA	NA
Pf3D7_01_v3	472557	A	-1182			0	0	0	0	0	0	1	1	1	1	NA	NA	NA	NA	NA	NA	NA	NA	NA	NA
Pf3D7_01_v3	472558	A	-1181			0	0	0	0	0	0	1	1	1	1	NA	NA	NA	NA	NA	NA	NA	NA	NA	NA
Pf3D7_01_v3	472559	A	-1180			0	0	0	0	0	0	1	1	1	1	NA	NA	NA	NA	NA	NA	NA	NA	NA	NA
Pf3D7_01_v3	472560	A	-1179			0	0	0	0	0	0	1	1	1	1	NA	NA	NA	NA	NA	NA	NA	NA	NA	NA
Pf3D7_01_v3	472561	G	-1178			0	0	0	0	0	0	1	1	1	1	NA	NA	NA	NA	NA	NA	NA	NA	NA	NA
Pf3D7_01_v3	472562	G	-1177			0	0	0	0	0	0	1	1	1	1	NA	NA	NA	NA	NA	NA	NA	NA	NA	NA
Pf3D7_01_v3	472563	G	-1176			0	0	0	0	0	0	1	1	1	1	NA	NA	NA	NA	NA	NA	NA	NA	NA	NA
Pf3D7_01_v3	472566	G	-1173			0	0	0	0	0	0	1	1	1	1	NA	NA	NA	NA	NA	NA	NA	NA	NA	NA
Pf3D7_01_v3	472568	G	-1171			0	0	0	0	0	0	1	1	1	1	NA	NA	NA	NA	NA	NA	NA	NA	NA	NA
Pf3D7_01_v3	472570	G	-1169			0	0	0	0	0	0	1	1	1	1	NA	NA	NA	NA	NA	NA	NA	NA	NA	NA
Pf3D7_01_v3	472571	G	-1168			0	0	0	0	0	0	1	1	1	1	NA	NA	NA	NA	NA	NA	NA	NA	NA	NA
Pf3D7_01_v3	472572	A	-1167			0	0	0	0	0	0	1	1	1	1	NA	NA	NA	NA	NA	NA	NA	NA	NA	NA
Pf3D7_01_v3	472573	T	-1166			0	0	0	0	0	0	1	1	1	1	NA	NA	NA	NA	NA	NA	NA	NA	NA	NA
Pf3D7_01_v3	472574	T	-1165			0	0	1	0	0	0	1	1.2037	1	1	NA	NA	NA	NA	NA	NA	NA	NA	NA	NA
Pf3D7_01_v3	472577	A	-1162			0	0	0	0	0	0	1	1	1	1	NA	NA	NA	NA	NA	NA	NA	NA	NA	NA
Pf3D7_01_v3	472578	A	-1161			0	0	0	0	0	0	1	1	1	1	NA	NA	NA	NA	NA	NA	NA	NA	NA	NA
Pf3D7_01_v3	472579	A	-1160			0	0	0	0	0	1	1	1	1	1.24463	NA	NA	NA	NA	NA	NA	NA	NA	NA	NA
Pf3D7_01_v3	472580	A	-1159			0	0	0	0	0	0	1	1	1	1	NA	NA	NA	NA	NA	NA	NA	NA	NA	NA
Pf3D7_01_v3	472581	A	-1158			0	0	0	0	0	0	1	1	1	1	NA	NA	NA	NA	NA	NA	NA	NA	NA	NA
Pf3D7_01_v3	472583	A	-1156			0	0	0	0	0	0	1	1	1	1	NA	NA	NA	NA	NA	NA	NA	NA	NA	NA
Pf3D7_01_v3	472584	A	-1155			0	0	0	0	0	0	1	1	1	1	NA	NA	NA	NA	NA	NA	NA	NA	NA	NA
Pf3D7_01_v3	472585	A	-1154			0	0	0	0	0	0	1	1	1	1	NA	NA	NA	NA	NA	NA	NA	NA	NA	NA
Pf3D7_01_v3	472586	A	-1153			0	0	0	0	0	0	1	1	1	1	NA	NA	NA	NA	NA	NA	NA	NA	NA	NA
Pf3D7_01_v3	472587	G	-1152			0	0	0	0	0	0	1	1	1	1	NA	NA	NA	NA	NA	NA	NA	NA	NA	NA
Pf3D7_01_v3	472588	A	-1151			0	0	0	0	0	0	1	1	1	1	NA	NA	NA	NA	NA	NA	NA	NA	NA	NA
Pf3D7_01_v3	472590	A	-1149			0	0	0	0	0	0	1	1	1	1	NA	NA	NA	NA	NA	NA	NA	NA	NA	NA
Pf3D7_01_v3	472591	A	-1148			0	0	0	0	0	0	1	1	1	1	NA	NA	NA	NA	NA	NA	NA	NA	NA	NA
Pf3D7_01_v3	472593	A	-1146			0	0	0	0	0	0	1	1	1	1	NA	NA	NA	NA	NA	NA	NA	NA	NA	NA
Pf3D7_01_v3	472595	A	-1144			0	0	0	0	0	0	1	1	1	1	NA	NA	NA	NA	NA	NA	NA	NA	NA	NA
Pf3D7_01_v3	472596	T	-1143			0	0	0	0	0	0	1	1	1	1	NA	NA	NA	NA	NA	NA	NA	NA	NA	NA
Pf3D7_01_v3	472598	T	-1141			0	0	0	0	0	0	1	1	1	1	NA	NA	NA	NA	NA	NA	NA	NA	NA	NA
Pf3D7_01_v3	472599	A	-1140			0	0	0	0	0	0	1	1	1	1	NA	NA	NA	NA	NA	NA	NA	NA	NA	NA
Pf3D7_01_v3	472600	T	-1139			0	0	0	0	0	0	1	1	1	1	NA	NA	NA	NA	NA	NA	NA	NA	NA	NA
Pf3D7_01_v3	472602	T	-1137			0	0	0	0	0	0	1	1	1	1	NA	NA	NA	NA	NA	NA	NA	NA	NA	NA
Pf3D7_01_v3	472603	A	-1136			0	0	0	0	1	0	1	1	0.796748	0.796748	NA	NA	NA	NA	NA	NA	NA	NA	NA	NA
Pf3D7_01_v3	472604	T	-1135			0	0	0	0	0	0	1	1	1	1	NA	NA	NA	NA	NA	NA	NA	NA	NA	NA
Pf3D7_01_v3	472605	G	-1134			0	0	0	0	0	0	1	1	1	1	NA	NA	NA	NA	NA	NA	NA	NA	NA	NA
Pf3D7_01_v3	472606	A	-1133			0	0	0	0	0	0	1	1	1	1	NA	NA	NA	NA	NA	NA	NA	NA	NA	NA
Pf3D7_01_v3	472608	C	-1131			0	0	0	0	0	0	1	1	1	1	NA	NA	NA	NA	NA	NA	NA	NA	NA	NA
Pf3D7_01_v3	472609	A	-1130			0	0	0	0	0	0	1	1	1	1	NA	NA	NA	NA	NA	NA	NA	NA	NA	NA
Pf3D7_01_v3	472610	A	-1129			0	0	0	0	0	0	1	1	1	1	NA	NA	NA	NA	NA	NA	NA	NA	NA	NA
Pf3D7_01_v3	472611	A	-1128			0	0	0	0	0	0	1	1	1	1	NA	NA	NA	NA	NA	NA	NA	NA	NA	NA
Pf3D7_01_v3	472612	A	-1127			0	0	0	0	0	0	1	1	1	1	NA	NA	NA	NA	NA	NA	NA	NA	NA	NA
Pf3D7_01_v3	472613	T	-1126			0	0	0	0	0	0	1	1	1	1	NA	NA	NA	NA	NA	NA	NA	NA	NA	NA
Pf3D7_01_v3	472614	T	-1125			0	0	0	0	1	1	1	1	0.796748	0.991657	NA	NA	NA	NA	NA	NA	NA	NA	NA	NA
Pf3D7_01_v3	472615	A	-1124			0	0	0	0	0	0	1	1	1	1	NA	NA	NA	NA	NA	NA	NA	NA	NA	NA
Pf3D7_01_v3	472616	G	-1123			0	0	0	0	0	0	1	1	1	1	NA	NA	NA	NA	NA	NA	NA	NA	NA	NA
Pf3D7_01_v3	472617	C	-1122			1	0	0	0	0	0	1.2	1	1	1	NA	NA	NA	NA	NA	NA	NA	NA	NA	NA
Pf3D7_01_v3	472618	T	-1121			0	0	0	0	0	0	1	1	1	1	NA	NA	NA	NA	NA	NA	NA	NA	NA	NA
Pf3D7_01_v3	472620	G	-1119			0	0	0	0	0	0	1	1	1	1	NA	NA	NA	NA	NA	NA	NA	NA	NA	NA
Pf3D7_01_v3	472621	T	-1118			0	0	0	0	0	0	1	1	1	1	NA	NA	NA	NA	NA	NA	NA	NA	NA	NA
Pf3D7_01_v3	472622	A	-1117			0	0	0	0	0	0	1	1	1	1	NA	NA	NA	NA	NA	NA	NA	NA	NA	NA
Pf3D7_01_v3	472623	A	-1116			0	0	0	0	0	0	1	1	1	1	NA	NA	NA	NA	NA	NA	NA	NA	NA	NA
Pf3D7_01_v3	472625	G	-1114			0	0	0	0	0	0	1	1	1	1	NA	NA	NA	NA	NA	NA	NA	NA	NA	NA
Pf3D7_01_v3	472626	A	-1113			0	0	0	0	0	0	1	1	1	1	NA	NA	NA	NA	NA	NA	NA	NA	NA	NA
Pf3D7_01_v3	472628	G	-1111			0	0	0	0	0	0	1	1	1	1	NA	NA	NA	NA	NA	NA	NA	NA	NA	NA
Pf3D7_01_v3	472631	A	-1108			0	0	0	0	0	0	1	1	1	1	NA	NA	NA	NA	NA	NA	NA	NA	NA	NA
Pf3D7_01_v3	472632	T	-1107			0	0	0	0	0	0	1	1	1	1	NA	NA	NA	NA	NA	NA	NA	NA	NA	NA
Pf3D7_01_v3	472634	A	-1105			0	0	0	0	0	0	1	1	1	1	NA	NA	NA	NA	NA	NA	NA	NA	NA	NA
Pf3D7_01_v3	472635	T	-1104			0	0	0	0	0	0	1	1	1	1	NA	NA	NA	NA	NA	NA	NA	NA	NA	NA
Pf3D7_01_v3	472636	A	-1103			0	0	0	0	0	0	1	1	1	1	NA	NA	NA	NA	NA	NA	NA	NA	NA	NA
Pf3D7_01_v3	472637	T	-1102			0	0	0	0	0	0	1	1	1	1	NA	NA	NA	NA	NA	NA	NA	NA	NA	NA
Pf3D7_01_v3	472638	A	-1101			0	0	0	0	0	0	1	1	1	1	NA	NA	NA	NA	NA	NA	NA	NA	NA	NA
Pf3D7_01_v3	472639	T	-1100			0	0	0	0	0	0	1	1	1	1	NA	NA	NA	NA	NA	NA	NA	NA	NA	NA
Pf3D7_01_v3	472640	A	-1099			0	0	0	0	0	0	1	1	1	1	NA	NA	NA	NA	NA	NA	NA	NA	NA	NA
Pf3D7_01_v3	472641	A	-1098			0	0	0	0	0	0	1	1	1	1	NA	NA	NA	NA	NA	NA	NA	NA	NA	NA
Pf3D7_01_v3	472642	T	-1097			0	0	0	0	0	0	1	1	1	1	NA	NA	NA	NA	NA	NA	NA	NA	NA	NA
Pf3D7_01_v3	472643	A	-1096			0	0	0	0	0	0	1	1	1	1	NA	NA	NA	NA	NA	NA	NA	NA	NA	NA
Pf3D7_01_v3	472644	T	-1095			0	0	0	0	0	0	1	1	1	1	NA	NA	NA	NA	NA	NA	NA	NA	NA	NA
Pf3D7_01_v3	472645	C	-1094			0	0	0	0	0	0	1	1	1	1	NA	NA	NA	NA	NA	NA	NA	NA	NA	NA
Pf3D7_01_v3	472646	A	-1093			0	0	0	0	0	0	1	1	1	1	NA	NA	NA	NA	NA	NA	NA	NA	NA	NA
Pf3D7_01_v3	472648	A	-1091			0	0	0	0	0	0	1	1	1	1	NA	NA	NA	NA	NA	NA	NA	NA	NA	NA
Pf3D7_01_v3	472649	A	-1090			0	0	0	0	0	0	1	1	1	1	NA	NA	NA	NA	NA	NA	NA	NA	NA	NA
Pf3D7_01_v3	472650	A	-1089			0	0	0	0	0	0	1	1	1	1	NA	NA	NA	NA	NA	NA	NA	NA	NA	NA
Pf3D7_01_v3	472651	A	-1088			0	0	0	0	0	0	1	1	1	1	NA	NA	NA	NA	NA	NA	NA	NA	NA	NA
Pf3D7_01_v3	472652	T	-1087			0	0	0	0	0	0	1	1	1	1	NA	NA	NA	NA	NA	NA	NA	NA	NA	NA
Pf3D7_01_v3	472653	T	-1086			0	0	0	0	0	0	1	1	1	1	NA	NA	NA	NA	NA	NA	NA	NA	NA	NA
Pf3D7_01_v3	472654	T	-1085			0	0	0	0	0	0	1	1	1	1	NA	NA	NA	NA	NA	NA	NA	NA	NA	NA
Pf3D7_01_v3	472655	A	-1084			0	0	0	0	0	0	1	1	1	1	NA	NA	NA	NA	NA	NA	NA	NA	NA	NA
Pf3D7_01_v3	472656	T	-1083			0	0	0	0	0	0	1	1	1	1	NA	NA	NA	NA	NA	NA	NA	NA	NA	NA
Pf3D7_01_v3	472657	A	-1082			0	0	0	0	0	0	1	1	1	1	NA	NA	NA	NA	NA	NA	NA	NA	NA	NA
Pf3D7_01_v3	472659	G	-1080			0	0	0	1	0	0	1	1	1.20921	1	NA	NA	NA	NA	NA	NA	NA	NA	NA	NA
Pf3D7_01_v3	472660	T	-1079			0	0	0	0	0	0	1	1	1	1	NA	NA	NA	NA	NA	NA	NA	NA	NA	NA
Pf3D7_01_v3	472661	A	-1078			0	0	0	0	0	0	1	1	1	1	NA	NA	NA	NA	NA	NA	NA	NA	NA	NA
Pf3D7_01_v3	472662	C	-1077			0	0	0	0	0	0	1	1	1	1	NA	NA	NA	NA	NA	NA	NA	NA	NA	NA
Pf3D7_01_v3	472663	A	-1076			0	0	0	0	0	0	1	1	1	1	NA	NA	NA	NA	NA	NA	NA	NA	NA	NA
Pf3D7_01_v3	472666	T	-1073			0	0	0	0	0	0	1	1	1	1	NA	NA	NA	NA	NA	NA	NA	NA	NA	NA
Pf3D7_01_v3	472667	A	-1072			0	0	0	0	0	0	1	1	1	1	NA	NA	NA	NA	NA	NA	NA	NA	NA	NA
Pf3D7_01_v3	472668	T	-1071			0	0	0	0	0	0	1	1	1	1	NA	NA	NA	NA	NA	NA	NA	NA	NA	NA
Pf3D7_01_v3	472671	G	-1068			0	0	0	0	0	0	1	1	1	1	NA	NA	NA	NA	NA	NA	NA	NA	NA	NA
Pf3D7_01_v3	472673	T	-1066			0	0	0	0	0	0	1	1	1	1	NA	NA	NA	NA	NA	NA	NA	NA	NA	NA
Pf3D7_01_v3	472674	A	-1065			0	0	0	0	0	0	1	1	1	1	NA	NA	NA	NA	NA	NA	NA	NA	NA	NA
Pf3D7_01_v3	472676	T	-1063			0	0	0	0	0	0	1	1	1	1	NA	NA	NA	NA	NA	NA	NA	NA	NA	NA
Pf3D7_01_v3	472677	A	-1062			0	0	0	0	0	0	1	1	1	1	NA	NA	NA	NA	NA	NA	NA	NA	NA	NA
Pf3D7_01_v3	472678	T	-1061			0	0	0	0	0	0	1	1	1	1	NA	NA	NA	NA	NA	NA	NA	NA	NA	NA
Pf3D7_01_v3	472681	A	-1058			0	0	0	0	0	0	1	1	1	1	NA	NA	NA	NA	NA	NA	NA	NA	NA	NA
Pf3D7_01_v3	472682	C	-1057			0	0	0	0	0	0	1	1	1	1	NA	NA	NA	NA	NA	NA	NA	NA	NA	NA
Pf3D7_01_v3	472684	A	-1055			0	0	0	0	0	0	1	1	1	1	NA	NA	NA	NA	NA	NA	NA	NA	NA	NA
Pf3D7_01_v3	472685	A	-1054			0	0	0	0	0	0	1	1	1	1	NA	NA	NA	NA	NA	NA	NA	NA	NA	NA
Pf3D7_01_v3	472687	A	-1052			0	0	0	0	0	0	1	1	1	1	NA	NA	NA	NA	NA	NA	NA	NA	NA	NA
Pf3D7_01_v3	472688	T	-1051			0	0	0	0	0	0	1	1	1	1	NA	NA	NA	NA	NA	NA	NA	NA	NA	NA
Pf3D7_01_v3	472690	T	-1049			0	0	0	0	0	0	1	1	1	1	NA	NA	NA	NA	NA	NA	NA	NA	NA	NA
Pf3D7_01_v3	472692	A	-1047			0	0	0	0	0	0	1	1	1	1	NA	NA	NA	NA	NA	NA	NA	NA	NA	NA
Pf3D7_01_v3	472694	A	-1045			0	0	0	0	0	0	1	1	1	1	NA	NA	NA	NA	NA	NA	NA	NA	NA	NA
Pf3D7_01_v3	472695	A	-1044			0	0	0	0	0	0	1	1	1	1	NA	NA	NA	NA	NA	NA	NA	NA	NA	NA
Pf3D7_01_v3	472696	T	-1043			0	0	0	0	0	0	1	1	1	1	NA	NA	NA	NA	NA	NA	NA	NA	NA	NA
Pf3D7_01_v3	472697	A	-1042			0	0	0	0	0	0	1	1	1	1	NA	NA	NA	NA	NA	NA	NA	NA	NA	NA
Pf3D7_01_v3	472698	T	-1041			0	0	0	0	0	0	1	1	1	1	NA	NA	NA	NA	NA	NA	NA	NA	NA	NA
Pf3D7_01_v3	472699	A	-1040			0	0	0	0	0	0	1	1	1	1	NA	NA	NA	NA	NA	NA	NA	NA	NA	NA
Pf3D7_01_v3	472701	T	-1038			0	0	0	0	0	0	1	1	1	1	NA	NA	NA	NA	NA	NA	NA	NA	NA	NA
Pf3D7_01_v3	472702	A	-1037			0	0	0	0	0	0	1	1	1	1	NA	NA	NA	NA	NA	NA	NA	NA	NA	NA
Pf3D7_01_v3	472703	A	-1036			0	0	0	0	0	0	1	1	1	1	NA	NA	NA	NA	NA	NA	NA	NA	NA	NA
Pf3D7_01_v3	472704	A	-1035			0	0	0	0	0	0	1	1	1	1	NA	NA	NA	NA	NA	NA	NA	NA	NA	NA
Pf3D7_01_v3	472705	T	-1034			0	0	0	0	0	0	1	1	1	1	NA	NA	NA	NA	NA	NA	NA	NA	NA	NA
Pf3D7_01_v3	472706	T	-1033			0	0	0	0	0	0	1	1	1	1	NA	NA	NA	NA	NA	NA	NA	NA	NA	NA
Pf3D7_01_v3	472707	A	-1032			0	0	0	0	0	0	1	1	1	1	NA	NA	NA	NA	NA	NA	NA	NA	NA	NA
Pf3D7_01_v3	472708	T	-1031			0	0	0	0	0	0	1	1	1	1	NA	NA	NA	NA	NA	NA	NA	NA	NA	NA
Pf3D7_01_v3	472709	T	-1030			0	0	0	0	0	0	1	1	1	1	NA	NA	NA	NA	NA	NA	NA	NA	NA	NA
Pf3D7_01_v3	472710	A	-1029			0	0	0	0	0	0	1	1	1	1	NA	NA	NA	NA	NA	NA	NA	NA	NA	NA
Pf3D7_01_v3	472711	T	-1028			0	0	0	0	0	0	1	1	1	1	NA	NA	NA	NA	NA	NA	NA	NA	NA	NA
Pf3D7_01_v3	472712	T	-1027			0	0	0	0	0	0	1	1	1	1	NA	NA	NA	NA	NA	NA	NA	NA	NA	NA
Pf3D7_01_v3	472713	T	-1026			0	0	0	0	0	0	1	1	1	1	NA	NA	NA	NA	NA	NA	NA	NA	NA	NA
Pf3D7_01_v3	472714	A	-1025			0	0	0	0	0	0	1	1	1	1	NA	NA	NA	NA	NA	NA	NA	NA	NA	NA
Pf3D7_01_v3	472715	A	-1024			0	0	0	0	0	0	1	1	1	1	NA	NA	NA	NA	NA	NA	NA	NA	NA	NA
Pf3D7_01_v3	472716	A	-1023			0	0	0	0	0	0	1	1	1	1	NA	NA	NA	NA	NA	NA	NA	NA	NA	NA
Pf3D7_01_v3	472717	A	-1022			1	0	0	0	0	0	1.2	1	1	1	NA	NA	NA	NA	NA	NA	NA	NA	NA	NA
Pf3D7_01_v3	472719	T	-1020			0	0	0	0	0	0	1	1	1	1	NA	NA	NA	NA	NA	NA	NA	NA	NA	NA
Pf3D7_01_v3	472720	A	-1019			0	0	0	0	0	0	1	1	1	1	NA	NA	NA	NA	NA	NA	NA	NA	NA	NA
Pf3D7_01_v3	472722	C	-1017			0	0	0	0	0	0	1	1	1	1	NA	NA	NA	NA	NA	NA	NA	NA	NA	NA
Pf3D7_01_v3	472724	A	-1015			0	0	0	0	0	0	1	1	1	1	NA	NA	NA	NA	NA	NA	NA	NA	NA	NA
Pf3D7_01_v3	472726	A	-1013			0	0	0	0	0	0	1	1	1	1	NA	NA	NA	NA	NA	NA	NA	NA	NA	NA
Pf3D7_01_v3	472727	A	-1012			0	0	0	0	0	0	1	1	1	1	NA	NA	NA	NA	NA	NA	NA	NA	NA	NA
Pf3D7_01_v3	472728	T	-1011			0	0	0	0	0	0	1	1	1	1	NA	NA	NA	NA	NA	NA	NA	NA	NA	NA
Pf3D7_01_v3	472731	T	-1008			0	0	0	1	0	0	1	1	1.20921	1	NA	NA	NA	NA	NA	NA	NA	NA	NA	NA
Pf3D7_01_v3	472732	A	-1007			0	0	0	2	0	0	1	1	1.41843	1	NA	NA	NA	NA	NA	NA	NA	NA	NA	NA
Pf3D7_01_v3	472733	T	-1006			0	0	0	0	0	0	1	1	1	1	NA	NA	NA	NA	NA	NA	NA	NA	NA	NA
Pf3D7_01_v3	472735	T	-1004			0	0	0	0	0	0	1	1	1	1	NA	NA	NA	NA	NA	NA	NA	NA	NA	NA
Pf3D7_01_v3	472737	T	-1002			0	0	0	0	0	0	1	1	1	1	NA	NA	NA	NA	NA	NA	NA	NA	NA	NA
Pf3D7_01_v3	472739	C	-1000			0	0	0	0	0	0	1	1	1	1	NA	NA	NA	NA	NA	NA	NA	NA	NA	NA
Pf3D7_01_v3	472743	T	-996			0	0	0	0	0	0	1	1	1	1	NA	NA	NA	NA	NA	NA	NA	NA	NA	NA
Pf3D7_01_v3	472744	A	-995			0	0	0	0	1	0	1	1	0.796748	0.796748	NA	NA	NA	NA	NA	NA	NA	NA	NA	NA
Pf3D7_01_v3	472746	T	-993			0	0	0	0	0	0	1	1	1	1	NA	NA	NA	NA	NA	NA	NA	NA	NA	NA
Pf3D7_01_v3	472747	T	-992			0	0	0	0	0	0	1	1	1	1	NA	NA	NA	NA	NA	NA	NA	NA	NA	NA
Pf3D7_01_v3	472748	A	-991			0	0	0	0	0	0	1	1	1	1	NA	NA	NA	NA	NA	NA	NA	NA	NA	NA
Pf3D7_01_v3	472750	G	-989			0	0	0	0	0	0	1	1	1	1	NA	NA	NA	NA	NA	NA	NA	NA	NA	NA
Pf3D7_01_v3	472752	A	-987			0	0	0	0	0	0	1	1	1	1	NA	NA	NA	NA	NA	NA	NA	NA	NA	NA
Pf3D7_01_v3	472753	A	-986			0	0	0	0	0	0	1	1	1	1	NA	NA	NA	NA	NA	NA	NA	NA	NA	NA
Pf3D7_01_v3	472755	A	-984			0	0	0	0	0	0	1	1	1	1	NA	NA	NA	NA	NA	NA	NA	NA	NA	NA
Pf3D7_01_v3	472756	A	-983			0	0	0	0	0	0	1	1	1	1	NA	NA	NA	NA	NA	NA	NA	NA	NA	NA
Pf3D7_01_v3	472757	A	-982			0	0	0	0	0	0	1	1	1	1	NA	NA	NA	NA	NA	NA	NA	NA	NA	NA
Pf3D7_01_v3	472758	A	-981			0	0	0	0	0	0	1	1	1	1	NA	NA	NA	NA	NA	NA	NA	NA	NA	NA
Pf3D7_01_v3	472759	T	-980			0	0	0	0	0	0	1	1	1	1	NA	NA	NA	NA	NA	NA	NA	NA	NA	NA
Pf3D7_01_v3	472762	T	-977			0	0	0	0	0	0	1	1	1	1	NA	NA	NA	NA	NA	NA	NA	NA	NA	NA
Pf3D7_01_v3	472763	T	-976			0	0	0	0	0	0	1	1	1	1	NA	NA	NA	NA	NA	NA	NA	NA	NA	NA
Pf3D7_01_v3	472765	T	-974			0	0	0	0	0	0	1	1	1	1	NA	NA	NA	NA	NA	NA	NA	NA	NA	NA
Pf3D7_01_v3	472767	A	-972			0	0	0	0	0	0	1	1	1	1	NA	NA	NA	NA	NA	NA	NA	NA	NA	NA
Pf3D7_01_v3	472770	T	-969			0	0	0	0	0	0	1	1	1	1	NA	NA	NA	NA	NA	NA	NA	NA	NA	NA
Pf3D7_01_v3	472771	C	-968			0	0	0	0	0	0	1	1	1	1	NA	NA	NA	NA	NA	NA	NA	NA	NA	NA
Pf3D7_01_v3	472772	A	-967			0	0	0	0	0	0	1	1	1	1	NA	NA	NA	NA	NA	NA	NA	NA	NA	NA
Pf3D7_01_v3	472774	A	-965			0	0	0	0	0	0	1	1	1	1	NA	NA	NA	NA	NA	NA	NA	NA	NA	NA
Pf3D7_01_v3	472792	A	-947			0	0	0	0	0	0	1	1	1	1	NA	NA	NA	NA	NA	NA	NA	NA	NA	NA
Pf3D7_01_v3	472810	T	-929			0	0	0	1	0	0	1	1	1.20921	1	NA	NA	NA	NA	NA	NA	NA	NA	NA	NA
Pf3D7_01_v3	472811	A	-928			0	0	0	0	0	0	1	1	1	1	NA	NA	NA	NA	NA	NA	NA	NA	NA	NA
Pf3D7_01_v3	472812	T	-927			0	0	0	0	0	0	1	1	1	1	NA	NA	NA	NA	NA	NA	NA	NA	NA	NA
Pf3D7_01_v3	472816	T	-923			0	0	0	0	0	0	1	1	1	1	NA	NA	NA	NA	NA	NA	NA	NA	NA	NA
Pf3D7_01_v3	472818	T	-921			0	0	0	0	0	0	1	1	1	1	NA	NA	NA	NA	NA	NA	NA	NA	NA	NA
Pf3D7_01_v3	472819	A	-920			0	0	0	0	0	0	1	1	1	1	NA	NA	NA	NA	NA	NA	NA	NA	NA	NA
Pf3D7_01_v3	472820	T	-919			0	0	0	1	0	0	1	1	1.20921	1	NA	NA	NA	NA	NA	NA	NA	NA	NA	NA
Pf3D7_01_v3	472822	T	-917			0	0	0	0	0	0	1	1	1	1	NA	NA	NA	NA	NA	NA	NA	NA	NA	NA
Pf3D7_01_v3	472825	C	-914			0	0	0	0	0	0	1	1	1	1	NA	NA	NA	NA	NA	NA	NA	NA	NA	NA
Pf3D7_01_v3	472827	T	-912			0	0	0	0	0	0	1	1	1	1	NA	NA	NA	NA	NA	NA	NA	NA	NA	NA
Pf3D7_01_v3	472828	T	-911			4	0	0	0	0	0	1.8	1	1	1	NA	NA	NA	NA	NA	NA	NA	NA	NA	NA
Pf3D7_01_v3	472831	A	-908			0	0	0	0	0	0	1	1	1	1	NA	NA	NA	NA	NA	NA	NA	NA	NA	NA
Pf3D7_01_v3	472832	T	-907			0	0	0	0	0	1	1	1	1	1.24463	NA	NA	NA	NA	NA	NA	NA	NA	NA	NA
Pf3D7_01_v3	472835	T	-904			0	0	0	0	0	1	1	1	1	1.24463	NA	NA	NA	NA	NA	NA	NA	NA	NA	NA
Pf3D7_01_v3	472836	A	-903			0	0	0	0	0	0	1	1	1	1	NA	NA	NA	NA	NA	NA	NA	NA	NA	NA
Pf3D7_01_v3	472839	T	-900			0	0	0	0	0	0	1	1	1	1	NA	NA	NA	NA	NA	NA	NA	NA	NA	NA
Pf3D7_01_v3	472842	C	-897			0	0	0	0	0	0	1	1	1	1	NA	NA	NA	NA	NA	NA	NA	NA	NA	NA
Pf3D7_01_v3	472843	T	-896			0	0	0	0	0	0	1	1	1	1	NA	NA	NA	NA	NA	NA	NA	NA	NA	NA
Pf3D7_01_v3	472846	T	-893			0	1	0	0	0	0	0.741745	0.741745	1	1	NA	NA	NA	NA	NA	NA	NA	NA	NA	NA
Pf3D7_01_v3	472847	T	-892			0	0	0	0	1	0	1	1	0.796748	0.796748	NA	NA	NA	NA	NA	NA	NA	NA	NA	NA
Pf3D7_01_v3	472848	A	-891			0	7	0	1	1	0	0.290934	0.290934	0.963438	0.796748	NA	NA	NA	NA	NA	NA	NA	NA	NA	NA
Pf3D7_01_v3	472849	T	-890			0	4	0	0	6	0	0.41794	0.41794	0.395162	0.395162	NA	NA	NA	NA	NA	NA	NA	NA	NA	NA
Pf3D7_01_v3	472850	A	-889			2	7	3	2	35	2	0.407307	0.468719	0.142863	0.149998	NA	NA	NA	NA	NA	NA	NA	NA	NA	NA
Pf3D7_01_v3	472851	T	-888			0	0	2	3	0	1	1	1.40739	1.62764	1.24463	NA	NA	NA	NA	NA	NA	NA	NA	NA	NA
Pf3D7_01_v3	472852	A	-887			0	1	3	6	0	1	0.741745	1.19501	2.25528	1.24463	NA	NA	NA	NA	NA	NA	NA	NA	NA	NA
Pf3D7_01_v3	472853	A	-886			1	2	1	4	3	0	0.707403	0.709582	1.04053	0.566474	NA	NA	NA	NA	NA	NA	NA	NA	NA	NA
Pf3D7_01_v3	472854	T	-885			0	1	3	1	2	0	0.741745	1.19501	0.800695	0.662162	NA	NA	NA	NA	NA	NA	NA	NA	NA	NA
Pf3D7_01_v3	472855	A	-884			0	0	1	0	2	2	1	1.2037	0.662162	0.986133	NA	NA	NA	NA	NA	NA	NA	NA	NA	NA
Pf3D7_01_v3	472856	T	-883			0	1	3	4	1	2	0.741745	1.19501	1.46351	1.18657	NA	NA	NA	NA	NA	NA	NA	NA	NA	NA
Pf3D7_01_v3	472857	A	-882			0	1	0	3	0	1	0.741745	0.741745	1.62764	1.24463	NA	NA	NA	NA	NA	NA	NA	NA	NA	NA
Pf3D7_01_v3	472858	A	-881			5	0	1	0	0	7	2	1.2037	1	2.71241	NA	NA	NA	NA	NA	NA	NA	NA	NA	NA
Pf3D7_01_v3	472859	A	-880			1	1	0	3	2	6	0.890094	0.741745	1.07776	1.63407	NA	NA	NA	NA	NA	NA	NA	NA	NA	NA
Pf3D7_01_v3	472860	T	-879			5	0	0	1	1	7	2	1	0.963438	2.16111	NA	NA	NA	NA	NA	NA	NA	NA	NA	NA
Pf3D7_01_v3	472861	A	-878			0	0	2	0	0	0	1	1.40739	1	1	NA	NA	NA	NA	NA	NA	NA	NA	NA	NA
Pf3D7_01_v3	472862	G	-877			2	0	0	1	2	0	1.4	1	0.800695	0.662162	NA	NA	NA	NA	NA	NA	NA	NA	NA	NA
Pf3D7_01_v3	472863	A	-876			0	0	0	1	1	1	1	1	0.963438	0.991657	NA	NA	NA	NA	NA	NA	NA	NA	NA	NA
Pf3D7_01_v3	472864	C	-875			0	0	0	1	0	3	1	1	1.20921	1.73389	NA	NA	NA	NA	NA	NA	NA	NA	NA	NA
Pf3D7_01_v3	472865	C	-874			0	0	1	0	0	0	1	1.2037	1	1	NA	NA	NA	NA	NA	NA	NA	NA	NA	NA
Pf3D7_01_v3	472866	A	-873			2	0	2	2	0	0	1.4	1.40739	1.41843	1	NA	NA	NA	NA	NA	NA	NA	NA	NA	NA
Pf3D7_01_v3	472867	A	-872			1	0	0	1	0	4	1.2	1	1.20921	1.97852	NA	NA	NA	NA	NA	NA	NA	NA	NA	NA
Pf3D7_01_v3	472868	T	-871			1	0	1	1	0	1	1.2	1.2037	1.20921	1.24463	NA	NA	NA	NA	NA	NA	NA	NA	NA	NA
Pf3D7_01_v3	472869	T	-870			4	0	0	0	0	0	1.8	1	1	1	NA	NA	NA	NA	NA	NA	NA	NA	NA	NA
Pf3D7_01_v3	472870	C	-869			0	0	1	1	2	3	1	1.2037	0.800695	1.14812	NA	NA	NA	NA	NA	NA	NA	NA	NA	NA
Pf3D7_01_v3	472871	A	-868			3	0	0	0	0	0	1.6	1	1	1	NA	NA	NA	NA	NA	NA	NA	NA	NA	NA
Pf3D7_01_v3	472872	T	-867			1	1	0	2	0	3	0.890094	0.741745	1.41843	1.73389	NA	NA	NA	NA	NA	NA	NA	NA	NA	NA
Pf3D7_01_v3	472873	T	-866			0	0	0	0	2	3	1	1	0.662162	1.14812	NA	NA	NA	NA	NA	NA	NA	NA	NA	NA
Pf3D7_01_v3	472874	T	-865			0	0	0	0	2	0	1	1	0.662162	0.662162	NA	NA	NA	NA	NA	NA	NA	NA	NA	NA
Pf3D7_01_v3	472875	A	-864			1	0	0	0	0	0	1.2	1	1	1	NA	NA	NA	NA	NA	NA	NA	NA	NA	NA
Pf3D7_01_v3	472876	A	-863			0	0	0	2	0	4	1	1	1.41843	1.97852	NA	NA	NA	NA	NA	NA	NA	NA	NA	NA
Pf3D7_01_v3	472877	A	-862			7	0	0	1	0	1	2.4	1	1.20921	1.24463	NA	NA	NA	NA	NA	NA	NA	NA	NA	NA
Pf3D7_01_v3	472878	T	-861			0	0	0	1	0	0	1	1	1.20921	1	NA	NA	NA	NA	NA	NA	NA	NA	NA	NA
Pf3D7_01_v3	472879	A	-860			0	0	0	0	0	1	1	1	1	1.24463	NA	NA	NA	NA	NA	NA	NA	NA	NA	NA
Pf3D7_01_v3	472880	T	-859			0	0	1	1	0	0	1	1.2037	1.20921	1	NA	NA	NA	NA	NA	NA	NA	NA	NA	NA
Pf3D7_01_v3	472881	G	-858			3	1	0	4	1	0	1.18679	0.741745	1.46351	0.796748	NA	NA	NA	NA	NA	NA	NA	NA	NA	NA
Pf3D7_01_v3	472882	T	-857			0	0	0	2	3	3	1	1	0.803502	0.982205	NA	NA	NA	NA	NA	NA	NA	NA	NA	NA
Pf3D7_01_v3	472883	A	-856			0	0	0	4	2	2	1	1	1.21629	0.986133	NA	NA	NA	NA	NA	NA	NA	NA	NA	NA
Pf3D7_01_v3	472884	T	-855			0	0	0	0	0	0	1	1	1	1	NA	NA	NA	NA	NA	NA	NA	NA	NA	NA
Pf3D7_01_v3	472885	T	-854			2	0	0	0	1	1	1.4	1	0.796748	0.991657	NA	NA	NA	NA	NA	NA	NA	NA	NA	NA
Pf3D7_01_v3	472886	T	-853			0	0	1	0	0	0	1	1.2037	1	1	NA	NA	NA	NA	NA	NA	NA	NA	NA	NA
Pf3D7_01_v3	472887	C	-852			0	0	0	1	0	0	1	1	1.20921	1	NA	NA	NA	NA	NA	NA	NA	NA	NA	NA
Pf3D7_01_v3	472888	A	-851			1	0	1	1	0	2	1.2	1.2037	1.20921	1.48926	NA	NA	NA	NA	NA	NA	NA	NA	NA	NA
Pf3D7_01_v3	472889	T	-850			0	0	1	0	1	0	1	1.2037	0.796748	0.796748	NA	NA	NA	NA	NA	NA	NA	NA	NA	NA
Pf3D7_01_v3	472890	A	-849			0	0	1	1	0	2	1	1.2037	1.20921	1.48926	NA	NA	NA	NA	NA	NA	NA	NA	NA	NA
Pf3D7_01_v3	472891	T	-848			0	0	0	0	0	1	1	1	1	1.24463	NA	NA	NA	NA	NA	NA	NA	NA	NA	NA
Pf3D7_01_v3	472892	G	-847			0	0	0	0	0	1	1	1	1	1.24463	NA	NA	NA	NA	NA	NA	NA	NA	NA	NA
Pf3D7_01_v3	472893	G	-846			0	0	0	0	0	0	1	1	1	1	NA	NA	NA	NA	NA	NA	NA	NA	NA	NA
Pf3D7_01_v3	472894	A	-845			0	0	1	0	1	0	1	1.2037	0.796748	0.796748	NA	NA	NA	NA	NA	NA	NA	NA	NA	NA
Pf3D7_01_v3	472895	A	-844			2	0	0	0	1	0	1.4	1	0.796748	0.796748	NA	NA	NA	NA	NA	NA	NA	NA	NA	NA
Pf3D7_01_v3	472896	A	-843			0	1	0	1	1	0	0.741745	0.741745	0.963438	0.796748	NA	NA	NA	NA	NA	NA	NA	NA	NA	NA
Pf3D7_01_v3	472897	A	-842			0	0	0	0	0	1	1	1	1	1.24463	NA	NA	NA	NA	NA	NA	NA	NA	NA	NA
Pf3D7_01_v3	472898	T	-841			0	0	0	0	0	0	1	1	1	1	NA	NA	NA	NA	NA	NA	NA	NA	NA	NA
Pf3D7_01_v3	472899	C	-840			0	0	0	0	0	1	1	1	1	1.24463	NA	NA	NA	NA	NA	NA	NA	NA	NA	NA
Pf3D7_01_v3	472900	A	-839			1	0	0	0	1	0	1.2	1	0.796748	0.796748	NA	NA	NA	NA	NA	NA	NA	NA	NA	NA
Pf3D7_01_v3	472901	T	-838			0	1	0	0	0	0	0.741745	0.741745	1	1	NA	NA	NA	NA	NA	NA	NA	NA	NA	NA
Pf3D7_01_v3	472902	A	-837			0	0	0	0	1	0	1	1	0.796748	0.796748	NA	NA	NA	NA	NA	NA	NA	NA	NA	NA
Pf3D7_01_v3	472903	T	-836			1	0	0	0	0	0	1.2	1	1	1	NA	NA	NA	NA	NA	NA	NA	NA	NA	NA
Pf3D7_01_v3	472904	T	-835			0	1	0	0	1	0	0.741745	0.741745	0.796748	0.796748	NA	NA	NA	NA	NA	NA	NA	NA	NA	NA
Pf3D7_01_v3	472905	T	-834			0	0	0	0	0	0	1	1	1	1	NA	NA	NA	NA	NA	NA	NA	NA	NA	NA
Pf3D7_01_v3	472906	C	-833			0	0	0	0	0	0	1	1	1	1	NA	NA	NA	NA	NA	NA	NA	NA	NA	NA
Pf3D7_01_v3	472907	C	-832			0	0	0	0	0	0	1	1	1	1	NA	NA	NA	NA	NA	NA	NA	NA	NA	NA
Pf3D7_01_v3	472908	T	-831			0	0	0	0	0	0	1	1	1	1	NA	NA	NA	NA	NA	NA	NA	NA	NA	NA
Pf3D7_01_v3	472909	T	-830			1	0	0	0	0	0	1.2	1	1	1	NA	NA	NA	NA	NA	NA	NA	NA	NA	NA
Pf3D7_01_v3	472910	G	-829			0	1	0	0	0	0	0.741745	0.741745	1	1	NA	NA	NA	NA	NA	NA	NA	NA	NA	NA
Pf3D7_01_v3	472911	A	-828			0	0	0	0	0	0	1	1	1	1	NA	NA	NA	NA	NA	NA	NA	NA	NA	NA
Pf3D7_01_v3	472912	A	-827			0	0	0	0	0	0	1	1	1	1	NA	NA	NA	NA	NA	NA	NA	NA	NA	NA
Pf3D7_01_v3	472913	G	-826			1	0	0	1	0	0	1.2	1	1.20921	1	NA	NA	NA	NA	NA	NA	NA	NA	NA	NA
Pf3D7_01_v3	472914	T	-825			0	0	0	0	0	2	1	1	1	1.48926	NA	NA	NA	NA	NA	NA	NA	NA	NA	NA
Pf3D7_01_v3	472915	A	-824			0	0	1	0	0	1	1	1.2037	1	1.24463	NA	NA	NA	NA	NA	NA	NA	NA	NA	NA
Pf3D7_01_v3	472916	A	-823			3	0	2	1	0	0	1.6	1.40739	1.20921	1	NA	NA	NA	NA	NA	NA	NA	NA	NA	NA
Pf3D7_01_v3	472917	A	-822			0	0	0	0	0	0	1	1	1	1	NA	NA	NA	NA	NA	NA	NA	NA	NA	NA
Pf3D7_01_v3	472918	C	-821			0	1	0	0	1	0	0.741745	0.741745	0.796748	0.796748	NA	NA	NA	NA	NA	NA	NA	NA	NA	NA
Pf3D7_01_v3	472919	A	-820			0	0	0	0	0	2	1	1	1	1.48926	NA	NA	NA	NA	NA	NA	NA	NA	NA	NA
Pf3D7_01_v3	472920	A	-819			0	0	0	0	0	1	1	1	1	1.24463	NA	NA	NA	NA	NA	NA	NA	NA	NA	NA
Pf3D7_01_v3	472921	T	-818			1	0	0	0	1	0	1.2	1	0.796748	0.796748	NA	NA	NA	NA	NA	NA	NA	NA	NA	NA
Pf3D7_01_v3	472922	T	-817			0	0	0	1	0	0	1	1	1.20921	1	NA	NA	NA	NA	NA	NA	NA	NA	NA	NA
Pf3D7_01_v3	472923	C	-816			0	0	0	1	0	0	1	1	1.20921	1	NA	NA	NA	NA	NA	NA	NA	NA	NA	NA
Pf3D7_01_v3	472924	T	-815			0	0	0	1	0	1	1	1	1.20921	1.24463	NA	NA	NA	NA	NA	NA	NA	NA	NA	NA
Pf3D7_01_v3	472925	T	-814			0	0	0	1	0	0	1	1	1.20921	1	NA	NA	NA	NA	NA	NA	NA	NA	NA	NA
Pf3D7_01_v3	472926	A	-813			0	0	0	1	0	0	1	1	1.20921	1	NA	NA	NA	NA	NA	NA	NA	NA	NA	NA
Pf3D7_01_v3	472927	A	-812			0	0	0	0	0	0	1	1	1	1	NA	NA	NA	NA	NA	NA	NA	NA	NA	NA
Pf3D7_01_v3	472928	T	-811			1	0	0	1	0	1	1.2	1	1.20921	1.24463	NA	NA	NA	NA	NA	NA	NA	NA	NA	NA
Pf3D7_01_v3	472929	A	-810			0	0	1	0	0	0	1	1.2037	1	1	NA	NA	NA	NA	NA	NA	NA	NA	NA	NA
Pf3D7_01_v3	472930	C	-809			0	0	0	1	1	0	1	1	0.963438	0.796748	NA	NA	NA	NA	NA	NA	NA	NA	NA	NA
Pf3D7_01_v3	472931	A	-808			1	0	0	1	0	1	1.2	1	1.20921	1.24463	NA	NA	NA	NA	NA	NA	NA	NA	NA	NA
Pf3D7_01_v3	472932	T	-807			0	0	0	1	0	0	1	1	1.20921	1	NA	NA	NA	NA	NA	NA	NA	NA	NA	NA
Pf3D7_01_v3	472933	T	-806			0	0	0	0	0	0	1	1	1	1	NA	NA	NA	NA	NA	NA	NA	NA	NA	NA
Pf3D7_01_v3	472934	T	-805			0	0	0	0	0	1	1	1	1	1.24463	NA	NA	NA	NA	NA	NA	NA	NA	NA	NA
Pf3D7_01_v3	472935	A	-804			0	0	0	0	0	0	1	1	1	1	NA	NA	NA	NA	NA	NA	NA	NA	NA	NA
Pf3D7_01_v3	472936	A	-803			0	0	0	0	1	0	1	1	0.796748	0.796748	NA	NA	NA	NA	NA	NA	NA	NA	NA	NA
Pf3D7_01_v3	472937	A	-802			0	0	0	0	0	2	1	1	1	1.48926	NA	NA	NA	NA	NA	NA	NA	NA	NA	NA
Pf3D7_01_v3	472938	T	-801			0	0	0	2	1	0	1	1	1.13013	0.796748	NA	NA	NA	NA	NA	NA	NA	NA	NA	NA
Pf3D7_01_v3	472939	A	-800			1	0	0	0	1	0	1.2	1	0.796748	0.796748	NA	NA	NA	NA	NA	NA	NA	NA	NA	NA
Pf3D7_01_v3	472940	T	-799			1	0	3	0	1	0	1.2	1.61109	0.796748	0.796748	NA	NA	NA	NA	NA	NA	NA	NA	NA	NA
Pf3D7_01_v3	472941	T	-798			1	0	0	0	0	0	1.2	1	1	1	NA	NA	NA	NA	NA	NA	NA	NA	NA	NA
Pf3D7_01_v3	472942	T	-797			1	0	0	0	0	2	1.2	1	1	1.48926	NA	NA	NA	NA	NA	NA	NA	NA	NA	NA
Pf3D7_01_v3	472943	T	-796			0	0	0	0	0	0	1	1	1	1	NA	NA	NA	NA	NA	NA	NA	NA	NA	NA
Pf3D7_01_v3	472944	G	-795			0	0	0	0	0	3	1	1	1	1.73389	NA	NA	NA	NA	NA	NA	NA	NA	NA	NA
Pf3D7_01_v3	472945	T	-794			0	0	0	1	1	0	1	1	0.963438	0.796748	NA	NA	NA	NA	NA	NA	NA	NA	NA	NA
Pf3D7_01_v3	472946	T	-793			0	0	0	0	0	1	1	1	1	1.24463	NA	NA	NA	NA	NA	NA	NA	NA	NA	NA
Pf3D7_01_v3	472947	A	-792			0	0	0	0	0	0	1	1	1	1	NA	NA	NA	NA	NA	NA	NA	NA	NA	NA
Pf3D7_01_v3	472948	A	-791			1	0	0	0	0	0	1.2	1	1	1	NA	NA	NA	NA	NA	NA	NA	NA	NA	NA
Pf3D7_01_v3	472949	A	-790			0	0	0	0	0	0	1	1	1	1	NA	NA	NA	NA	NA	NA	NA	NA	NA	NA
Pf3D7_01_v3	472950	G	-789			0	0	0	0	0	0	1	1	1	1	NA	NA	NA	NA	NA	NA	NA	NA	NA	NA
Pf3D7_01_v3	472951	T	-788			0	1	0	2	0	0	0.741745	0.741745	1.41843	1	NA	NA	NA	NA	NA	NA	NA	NA	NA	NA
Pf3D7_01_v3	472952	A	-787			0	0	0	0	0	0	1	1	1	1	NA	NA	NA	NA	NA	NA	NA	NA	NA	NA
Pf3D7_01_v3	472953	T	-786			0	1	0	0	0	0	0.741745	0.741745	1	1	NA	NA	NA	NA	NA	NA	NA	NA	NA	NA
Pf3D7_01_v3	472954	T	-785			0	0	0	0	0	0	1	1	1	1	NA	NA	NA	NA	NA	NA	NA	NA	NA	NA
Pf3D7_01_v3	472955	A	-784			0	0	0	0	0	0	1	1	1	1	NA	NA	NA	NA	NA	NA	NA	NA	NA	NA
Pf3D7_01_v3	472956	A	-783			0	0	0	0	0	0	1	1	1	1	NA	NA	NA	NA	NA	NA	NA	NA	NA	NA
Pf3D7_01_v3	472957	A	-782			0	0	1	0	0	0	1	1.2037	1	1	NA	NA	NA	NA	NA	NA	NA	NA	NA	NA
Pf3D7_01_v3	472958	A	-781			0	0	0	3	0	1	1	1	1.62764	1.24463	NA	NA	NA	NA	NA	NA	NA	NA	NA	NA
Pf3D7_01_v3	472959	A	-780			0	0	0	0	0	0	1	1	1	1	NA	NA	NA	NA	NA	NA	NA	NA	NA	NA
Pf3D7_01_v3	472960	A	-779			0	0	0	0	0	1	1	1	1	1.24463	NA	NA	NA	NA	NA	NA	NA	NA	NA	NA
Pf3D7_01_v3	472961	T	-778			0	0	0	0	0	1	1	1	1	1.24463	NA	NA	NA	NA	NA	NA	NA	NA	NA	NA
Pf3D7_01_v3	472962	A	-777			0	0	0	0	0	1	1	1	1	1.24463	NA	NA	NA	NA	NA	NA	NA	NA	NA	NA
Pf3D7_01_v3	472963	A	-776			2	0	0	0	0	3	1.4	1	1	1.73389	NA	NA	NA	NA	NA	NA	NA	NA	NA	NA
Pf3D7_01_v3	472964	T	-775			0	0	0	0	0	0	1	1	1	1	NA	NA	NA	NA	NA	NA	NA	NA	NA	NA
Pf3D7_01_v3	472965	A	-774			0	0	0	0	1	1	1	1	0.796748	0.991657	NA	NA	NA	NA	NA	NA	NA	NA	NA	NA
Pf3D7_01_v3	472966	A	-773			0	0	1	1	0	2	1	1.2037	1.20921	1.48926	NA	NA	NA	NA	NA	NA	NA	NA	NA	NA
Pf3D7_01_v3	472967	T	-772			0	0	0	0	1	0	1	1	0.796748	0.796748	NA	NA	NA	NA	NA	NA	NA	NA	NA	NA
Pf3D7_01_v3	472968	C	-771			0	0	1	0	0	0	1	1.2037	1	1	NA	NA	NA	NA	NA	NA	NA	NA	NA	NA
Pf3D7_01_v3	472969	A	-770			0	0	0	0	0	0	1	1	1	1	NA	NA	NA	NA	NA	NA	NA	NA	NA	NA
Pf3D7_01_v3	472970	A	-769			0	0	0	0	1	0	1	1	0.796748	0.796748	NA	NA	NA	NA	NA	NA	NA	NA	NA	NA
Pf3D7_01_v3	472971	T	-768			0	0	0	1	0	1	1	1	1.20921	1.24463	NA	NA	NA	NA	NA	NA	NA	NA	NA	NA
Pf3D7_01_v3	472972	G	-767			0	0	0	0	0	0	1	1	1	1	NA	NA	NA	NA	NA	NA	NA	NA	NA	NA
Pf3D7_01_v3	472973	T	-766			0	0	0	1	0	0	1	1	1.20921	1	NA	NA	NA	NA	NA	NA	NA	NA	NA	NA
Pf3D7_01_v3	472974	T	-765			2	0	0	0	0	0	1.4	1	1	1	NA	NA	NA	NA	NA	NA	NA	NA	NA	NA
Pf3D7_01_v3	472975	T	-764			1	0	0	0	1	1	1.2	1	0.796748	0.991657	NA	NA	NA	NA	NA	NA	NA	NA	NA	NA
Pf3D7_01_v3	472976	A	-763			0	0	0	0	0	0	1	1	1	1	NA	NA	NA	NA	NA	NA	NA	NA	NA	NA
Pf3D7_01_v3	472977	T	-762			0	0	0	0	0	0	1	1	1	1	NA	NA	NA	NA	NA	NA	NA	NA	NA	NA
Pf3D7_01_v3	472978	A	-761			0	0	0	0	0	1	1	1	1	1.24463	NA	NA	NA	NA	NA	NA	NA	NA	NA	NA
Pf3D7_01_v3	472979	T	-760			0	0	0	0	0	0	1	1	1	1	NA	NA	NA	NA	NA	NA	NA	NA	NA	NA
Pf3D7_01_v3	472980	C	-759			0	0	0	0	0	0	1	1	1	1	NA	NA	NA	NA	NA	NA	NA	NA	NA	NA
Pf3D7_01_v3	472981	T	-758			0	0	0	0	0	0	1	1	1	1	NA	NA	NA	NA	NA	NA	NA	NA	NA	NA
Pf3D7_01_v3	472982	G	-757			2	0	0	0	0	0	1.4	1	1	1	NA	NA	NA	NA	NA	NA	NA	NA	NA	NA
Pf3D7_01_v3	472983	T	-756			0	0	0	0	0	0	1	1	1	1	NA	NA	NA	NA	NA	NA	NA	NA	NA	NA
Pf3D7_01_v3	472984	T	-755			0	0	0	0	0	0	1	1	1	1	NA	NA	NA	NA	NA	NA	NA	NA	NA	NA
Pf3D7_01_v3	472985	A	-754			0	0	0	0	0	1	1	1	1	1.24463	NA	NA	NA	NA	NA	NA	NA	NA	NA	NA
Pf3D7_01_v3	472986	A	-753			0	0	0	2	0	0	1	1	1.41843	1	NA	NA	NA	NA	NA	NA	NA	NA	NA	NA
Pf3D7_01_v3	472987	A	-752			0	0	0	0	0	0	1	1	1	1	NA	NA	NA	NA	NA	NA	NA	NA	NA	NA
Pf3D7_01_v3	472988	T	-751			0	0	2	0	0	2	1	1.40739	1	1.48926	NA	NA	NA	NA	NA	NA	NA	NA	NA	NA
Pf3D7_01_v3	472989	T	-750			0	0	1	0	0	0	1	1.2037	1	1	NA	NA	NA	NA	NA	NA	NA	NA	NA	NA
Pf3D7_01_v3	472990	A	-749			1	0	0	0	0	0	1.2	1	1	1	NA	NA	NA	NA	NA	NA	NA	NA	NA	NA
Pf3D7_01_v3	472991	A	-748			0	1	0	0	0	0	0.741745	0.741745	1	1	NA	NA	NA	NA	NA	NA	NA	NA	NA	NA
Pf3D7_01_v3	472992	A	-747			0	0	0	0	0	0	1	1	1	1	NA	NA	NA	NA	NA	NA	NA	NA	NA	NA
Pf3D7_01_v3	472993	T	-746			0	0	0	0	0	0	1	1	1	1	NA	NA	NA	NA	NA	NA	NA	NA	NA	NA
Pf3D7_01_v3	472994	G	-745			0	0	0	0	0	0	1	1	1	1	NA	NA	NA	NA	NA	NA	NA	NA	NA	NA
Pf3D7_01_v3	472996	T	-743			0	0	2	2	0	0	1	1.40739	1.41843	1	NA	NA	NA	NA	NA	NA	NA	NA	NA	NA
Pf3D7_01_v3	472997	A	-742			0	0	0	0	0	0	1	1	1	1	NA	NA	NA	NA	NA	NA	NA	NA	NA	NA
Pf3D7_01_v3	472998	T	-741			0	0	0	0	0	0	1	1	1	1	NA	NA	NA	NA	NA	NA	NA	NA	NA	NA
Pf3D7_01_v3	472999	A	-740			0	0	2	0	0	0	1	1.40739	1	1	NA	NA	NA	NA	NA	NA	NA	NA	NA	NA
Pf3D7_01_v3	473000	T	-739			0	0	0	3	0	0	1	1	1.62764	1	NA	NA	NA	NA	NA	NA	NA	NA	NA	NA
Pf3D7_01_v3	473001	A	-738			0	0	0	0	0	1	1	1	1	1.24463	NA	NA	NA	NA	NA	NA	NA	NA	NA	NA
Pf3D7_01_v3	473002	T	-737			0	0	1	0	0	0	1	1.2037	1	1	NA	NA	NA	NA	NA	NA	NA	NA	NA	NA
Pf3D7_01_v3	473003	A	-736			0	0	1	0	0	1	1	1.2037	1	1.24463	NA	NA	NA	NA	NA	NA	NA	NA	NA	NA
Pf3D7_01_v3	473004	T	-735			0	0	1	0	1	0	1	1.2037	0.796748	0.796748	NA	NA	NA	NA	NA	NA	NA	NA	NA	NA
Pf3D7_01_v3	473005	A	-734			0	0	1	0	0	3	1	1.2037	1	1.73389	NA	NA	NA	NA	NA	NA	NA	NA	NA	NA
Pf3D7_01_v3	473006	A	-733			0	0	0	0	0	0	1	1	1	1	NA	NA	NA	NA	NA	NA	NA	NA	NA	NA
Pf3D7_01_v3	473007	T	-732			0	0	0	0	0	3	1	1	1	1.73389	NA	NA	NA	NA	NA	NA	NA	NA	NA	NA
Pf3D7_01_v3	473008	A	-731			0	1	0	1	0	1	0.741745	0.741745	1.20921	1.24463	NA	NA	NA	NA	NA	NA	NA	NA	NA	NA
Pf3D7_01_v3	473009	A	-730			0	0	0	0	0	0	1	1	1	1	NA	NA	NA	NA	NA	NA	NA	NA	NA	NA
Pf3D7_01_v3	473010	T	-729			0	0	0	0	0	0	1	1	1	1	NA	NA	NA	NA	NA	NA	NA	NA	NA	NA
Pf3D7_01_v3	473011	A	-728			1	0	0	2	0	0	1.2	1	1.41843	1	NA	NA	NA	NA	NA	NA	NA	NA	NA	NA
Pf3D7_01_v3	473012	T	-727			0	1	1	0	0	1	0.741745	0.892835	1	1.24463	NA	NA	NA	NA	NA	NA	NA	NA	NA	NA
Pf3D7_01_v3	473013	A	-726			0	0	0	0	0	0	1	1	1	1	NA	NA	NA	NA	NA	NA	NA	NA	NA	NA
Pf3D7_01_v3	473014	A	-725			0	0	0	2	0	1	1	1	1.41843	1.24463	NA	NA	NA	NA	NA	NA	NA	NA	NA	NA
Pf3D7_01_v3	473015	A	-724			0	0	0	0	0	0	1	1	1	1	NA	NA	NA	NA	NA	NA	NA	NA	NA	NA
Pf3D7_01_v3	473016	T	-723			0	0	0	2	0	0	1	1	1.41843	1	NA	NA	NA	NA	NA	NA	NA	NA	NA	NA
Pf3D7_01_v3	473017	A	-722			2	0	2	0	0	0	1.4	1.40739	1	1	NA	NA	NA	NA	NA	NA	NA	NA	NA	NA
Pf3D7_01_v3	473018	A	-721			0	0	0	0	0	0	1	1	1	1	NA	NA	NA	NA	NA	NA	NA	NA	NA	NA
Pf3D7_01_v3	473019	G	-720			0	1	0	0	0	0	0.741745	0.741745	1	1	NA	NA	NA	NA	NA	NA	NA	NA	NA	NA
Pf3D7_01_v3	473020	C	-719			0	0	0	0	0	0	1	1	1	1	NA	NA	NA	NA	NA	NA	NA	NA	NA	NA
Pf3D7_01_v3	473021	A	-718			0	0	0	0	0	0	1	1	1	1	NA	NA	NA	NA	NA	NA	NA	NA	NA	NA
Pf3D7_01_v3	473022	A	-717			0	1	4	0	0	0	0.741745	1.3461	1	1	NA	NA	NA	NA	NA	NA	NA	NA	NA	NA
Pf3D7_01_v3	473023	T	-716			0	0	1	0	0	2	1	1.2037	1	1.48926	NA	NA	NA	NA	NA	NA	NA	NA	NA	NA
Pf3D7_01_v3	473024	G	-715			0	0	0	0	0	0	1	1	1	1	NA	NA	NA	NA	NA	NA	NA	NA	NA	NA
Pf3D7_01_v3	473025	T	-714			0	0	0	0	0	0	1	1	1	1	NA	NA	NA	NA	NA	NA	NA	NA	NA	NA
Pf3D7_01_v3	473026	T	-713			0	0	0	0	0	0	1	1	1	1	NA	NA	NA	NA	NA	NA	NA	NA	NA	NA
Pf3D7_01_v3	473027	G	-712			0	0	0	0	0	0	1	1	1	1	NA	NA	NA	NA	NA	NA	NA	NA	NA	NA
Pf3D7_01_v3	473028	C	-711			0	0	0	0	0	0	1	1	1	1	NA	NA	NA	NA	NA	NA	NA	NA	NA	NA
Pf3D7_01_v3	473029	T	-710			0	1	0	0	0	0	0.741745	0.741745	1	1	NA	NA	NA	NA	NA	NA	NA	NA	NA	NA
Pf3D7_01_v3	473030	T	-709			0	0	0	0	0	0	1	1	1	1	NA	NA	NA	NA	NA	NA	NA	NA	NA	NA
Pf3D7_01_v3	473031	T	-708			0	0	0	0	0	0	1	1	1	1	NA	NA	NA	NA	NA	NA	NA	NA	NA	NA
Pf3D7_01_v3	473032	T	-707			0	0	0	1	0	0	1	1	1.20921	1	NA	NA	NA	NA	NA	NA	NA	NA	NA	NA
Pf3D7_01_v3	473033	T	-706			0	0	0	0	0	0	1	1	1	1	NA	NA	NA	NA	NA	NA	NA	NA	NA	NA
Pf3D7_01_v3	473034	T	-705			1	0	0	0	1	0	1.2	1	0.796748	0.796748	NA	NA	NA	NA	NA	NA	NA	NA	NA	NA
Pf3D7_01_v3	473035	T	-704			1	0	0	0	0	0	1.2	1	1	1	NA	NA	NA	NA	NA	NA	NA	NA	NA	NA
Pf3D7_01_v3	473036	A	-703			2	0	0	0	0	0	1.4	1	1	1	NA	NA	NA	NA	NA	NA	NA	NA	NA	NA
Pf3D7_01_v3	473037	T	-702			0	0	0	0	0	0	1	1	1	1	NA	NA	NA	NA	NA	NA	NA	NA	NA	NA
Pf3D7_01_v3	473038	A	-701			1	0	0	0	0	0	1.2	1	1	1	NA	NA	NA	NA	NA	NA	NA	NA	NA	NA
Pf3D7_01_v3	473039	T	-700			0	0	0	0	0	0	1	1	1	1	NA	NA	NA	NA	NA	NA	NA	NA	NA	NA
Pf3D7_01_v3	473040	T	-699			0	0	0	0	0	0	1	1	1	1	NA	NA	NA	NA	NA	NA	NA	NA	NA	NA
Pf3D7_01_v3	473041	A	-698			0	0	0	0	0	0	1	1	1	1	NA	NA	NA	NA	NA	NA	NA	NA	NA	NA
Pf3D7_01_v3	473042	A	-697			1	0	0	0	0	0	1.2	1	1	1	NA	NA	NA	NA	NA	NA	NA	NA	NA	NA
Pf3D7_01_v3	473043	A	-696			0	0	0	0	1	0	1	1	0.796748	0.796748	NA	NA	NA	NA	NA	NA	NA	NA	NA	NA
Pf3D7_01_v3	473044	A	-695			0	1	0	0	0	0	0.741745	0.741745	1	1	NA	NA	NA	NA	NA	NA	NA	NA	NA	NA
Pf3D7_01_v3	473045	A	-694			0	0	0	0	0	0	1	1	1	1	NA	NA	NA	NA	NA	NA	NA	NA	NA	NA
Pf3D7_01_v3	473046	A	-693			0	0	0	0	0	0	1	1	1	1	NA	NA	NA	NA	NA	NA	NA	NA	NA	NA
Pf3D7_01_v3	473047	A	-692			0	0	0	0	0	0	1	1	1	1	NA	NA	NA	NA	NA	NA	NA	NA	NA	NA
Pf3D7_01_v3	473048	A	-691			0	0	0	0	0	0	1	1	1	1	NA	NA	NA	NA	NA	NA	NA	NA	NA	NA
Pf3D7_01_v3	473049	A	-690			0	0	0	0	0	0	1	1	1	1	NA	NA	NA	NA	NA	NA	NA	NA	NA	NA
Pf3D7_01_v3	473050	A	-689			0	1	0	0	0	0	0.741745	0.741745	1	1	NA	NA	NA	NA	NA	NA	NA	NA	NA	NA
Pf3D7_01_v3	473051	A	-688			0	0	0	1	0	0	1	1	1.20921	1	NA	NA	NA	NA	NA	NA	NA	NA	NA	NA
Pf3D7_01_v3	473052	A	-687			0	0	0	0	0	2	1	1	1	1.48926	NA	NA	NA	NA	NA	NA	NA	NA	NA	NA
Pf3D7_01_v3	473053	A	-686			1	0	0	1	0	1	1.2	1	1.20921	1.24463	NA	NA	NA	NA	NA	NA	NA	NA	NA	NA
Pf3D7_01_v3	473054	A	-685			1	2	2	0	1	1	0.707403	0.829661	0.796748	0.991657	NA	NA	NA	NA	NA	NA	NA	NA	NA	NA
Pf3D7_01_v3	473055	A	-684			0	0	0	0	0	0	1	1	1	1	NA	NA	NA	NA	NA	NA	NA	NA	NA	NA
Pf3D7_01_v3	473056	C	-683			0	0	0	0	0	0	1	1	1	1	NA	NA	NA	NA	NA	NA	NA	NA	NA	NA
Pf3D7_01_v3	473057	G	-682			0	0	1	1	0	1	1	1.2037	1.20921	1.24463	NA	NA	NA	NA	NA	NA	NA	NA	NA	NA
Pf3D7_01_v3	473058	T	-681			0	0	0	0	1	1	1	1	0.796748	0.991657	NA	NA	NA	NA	NA	NA	NA	NA	NA	NA
Pf3D7_01_v3	473059	T	-680			0	0	0	1	1	0	1	1	0.963438	0.796748	NA	NA	NA	NA	NA	NA	NA	NA	NA	NA
Pf3D7_01_v3	473060	T	-679			0	0	0	0	0	0	1	1	1	1	NA	NA	NA	NA	NA	NA	NA	NA	NA	NA
Pf3D7_01_v3	473061	T	-678			0	0	0	0	0	0	1	1	1	1	NA	NA	NA	NA	NA	NA	NA	NA	NA	NA
Pf3D7_01_v3	473062	T	-677			0	0	0	1	0	0	1	1	1.20921	1	NA	NA	NA	NA	NA	NA	NA	NA	NA	NA
Pf3D7_01_v3	473063	A	-676			0	0	0	1	0	0	1	1	1.20921	1	NA	NA	NA	NA	NA	NA	NA	NA	NA	NA
Pf3D7_01_v3	473064	A	-675			0	0	0	0	0	0	1	1	1	1	NA	NA	NA	NA	NA	NA	NA	NA	NA	NA
Pf3D7_01_v3	473065	A	-674			1	0	0	0	0	0	1.2	1	1	1	NA	NA	NA	NA	NA	NA	NA	NA	NA	NA
Pf3D7_01_v3	473066	T	-673			0	0	0	0	0	0	1	1	1	1	NA	NA	NA	NA	NA	NA	NA	NA	NA	NA
Pf3D7_01_v3	473067	T	-672			0	0	0	0	0	0	1	1	1	1	NA	NA	NA	NA	NA	NA	NA	NA	NA	NA
Pf3D7_01_v3	473068	A	-671			0	0	1	1	0	0	1	1.2037	1.20921	1	NA	NA	NA	NA	NA	NA	NA	NA	NA	NA
Pf3D7_01_v3	473069	A	-670			0	0	0	0	0	0	1	1	1	1	NA	NA	NA	NA	NA	NA	NA	NA	NA	NA
Pf3D7_01_v3	473070	A	-669			0	0	0	0	0	0	1	1	1	1	NA	NA	NA	NA	NA	NA	NA	NA	NA	NA
Pf3D7_01_v3	473071	G	-668			0	0	0	2	0	0	1	1	1.41843	1	NA	NA	NA	NA	NA	NA	NA	NA	NA	NA
Pf3D7_01_v3	473072	T	-667			0	0	0	0	0	0	1	1	1	1	NA	NA	NA	NA	NA	NA	NA	NA	NA	NA
Pf3D7_01_v3	473073	A	-666			3	0	0	0	0	0	1.6	1	1	1	NA	NA	NA	NA	NA	NA	NA	NA	NA	NA
Pf3D7_01_v3	473074	T	-665			0	0	0	0	0	0	1	1	1	1	NA	NA	NA	NA	NA	NA	NA	NA	NA	NA
Pf3D7_01_v3	473075	C	-664			0	0	0	0	0	0	1	1	1	1	NA	NA	NA	NA	NA	NA	NA	NA	NA	NA
Pf3D7_01_v3	473076	A	-663			0	0	0	0	0	0	1	1	1	1	NA	NA	NA	NA	NA	NA	NA	NA	NA	NA
Pf3D7_01_v3	473077	C	-662			0	0	0	0	0	0	1	1	1	1	NA	NA	NA	NA	NA	NA	NA	NA	NA	NA
Pf3D7_01_v3	473078	A	-661			0	0	0	0	0	0	1	1	1	1	NA	NA	NA	NA	NA	NA	NA	NA	NA	NA
Pf3D7_01_v3	473079	A	-660			0	0	1	0	0	0	1	1.2037	1	1	NA	NA	NA	NA	NA	NA	NA	NA	NA	NA
Pf3D7_01_v3	473080	T	-659			0	0	0	0	0	0	1	1	1	1	NA	NA	NA	NA	NA	NA	NA	NA	NA	NA
Pf3D7_01_v3	473081	A	-658			0	0	0	0	0	0	1	1	1	1	NA	NA	NA	NA	NA	NA	NA	NA	NA	NA
Pf3D7_01_v3	473082	T	-657			0	0	0	0	0	0	1	1	1	1	NA	NA	NA	NA	NA	NA	NA	NA	NA	NA
Pf3D7_01_v3	473083	G	-656			2	0	0	0	0	0	1.4	1	1	1	NA	NA	NA	NA	NA	NA	NA	NA	NA	NA
Pf3D7_01_v3	473084	A	-655			0	0	0	0	0	0	1	1	1	1	NA	NA	NA	NA	NA	NA	NA	NA	NA	NA
Pf3D7_01_v3	473085	A	-654			0	0	0	0	0	0	1	1	1	1	NA	NA	NA	NA	NA	NA	NA	NA	NA	NA
Pf3D7_01_v3	473086	A	-653			0	0	0	0	0	0	1	1	1	1	NA	NA	NA	NA	NA	NA	NA	NA	NA	NA
Pf3D7_01_v3	473087	A	-652			0	0	1	0	1	0	1	1.2037	0.796748	0.796748	NA	NA	NA	NA	NA	NA	NA	NA	NA	NA
Pf3D7_01_v3	473088	A	-651			0	0	0	0	0	0	1	1	1	1	NA	NA	NA	NA	NA	NA	NA	NA	NA	NA
Pf3D7_01_v3	473089	C	-650			0	0	0	0	0	0	1	1	1	1	NA	NA	NA	NA	NA	NA	NA	NA	NA	NA
Pf3D7_01_v3	473090	A	-649			0	0	0	0	0	0	1	1	1	1	NA	NA	NA	NA	NA	NA	NA	NA	NA	NA
Pf3D7_01_v3	473092	A	-647			0	0	0	0	0	0	1	1	1	1	NA	NA	NA	NA	NA	NA	NA	NA	NA	NA
Pf3D7_01_v3	473093	A	-646			0	0	0	0	0	0	1	1	1	1	NA	NA	NA	NA	NA	NA	NA	NA	NA	NA
Pf3D7_01_v3	473095	A	-644			0	0	0	0	0	0	1	1	1	1	NA	NA	NA	NA	NA	NA	NA	NA	NA	NA
Pf3D7_01_v3	473096	A	-643			0	0	0	0	0	0	1	1	1	1	NA	NA	NA	NA	NA	NA	NA	NA	NA	NA
Pf3D7_01_v3	473098	A	-641			0	0	0	0	0	0	1	1	1	1	NA	NA	NA	NA	NA	NA	NA	NA	NA	NA
Pf3D7_01_v3	473102	A	-637			0	0	0	0	0	0	1	1	1	1	NA	NA	NA	NA	NA	NA	NA	NA	NA	NA
Pf3D7_01_v3	473103	A	-636			0	0	0	0	0	0	1	1	1	1	NA	NA	NA	NA	NA	NA	NA	NA	NA	NA
Pf3D7_01_v3	473104	T	-635			0	0	0	0	0	0	1	1	1	1	NA	NA	NA	NA	NA	NA	NA	NA	NA	NA
Pf3D7_01_v3	473108	A	-631			0	0	0	0	0	0	1	1	1	1	NA	NA	NA	NA	NA	NA	NA	NA	NA	NA
Pf3D7_01_v3	473109	A	-630			0	0	0	0	0	0	1	1	1	1	NA	NA	NA	NA	NA	NA	NA	NA	NA	NA
Pf3D7_01_v3	473113	T	-626			0	0	0	0	0	0	1	1	1	1	NA	NA	NA	NA	NA	NA	NA	NA	NA	NA
Pf3D7_01_v3	473114	A	-625			0	0	0	2	0	0	1	1	1.41843	1	NA	NA	NA	NA	NA	NA	NA	NA	NA	NA
Pf3D7_01_v3	473115	T	-624			1	0	0	0	1	0	1.2	1	0.796748	0.796748	NA	NA	NA	NA	NA	NA	NA	NA	NA	NA
Pf3D7_01_v3	473116	A	-623			0	0	0	0	0	0	1	1	1	1	NA	NA	NA	NA	NA	NA	NA	NA	NA	NA
Pf3D7_01_v3	473117	T	-622			0	0	1	0	1	0	1	1.2037	0.796748	0.796748	NA	NA	NA	NA	NA	NA	NA	NA	NA	NA
Pf3D7_01_v3	473118	A	-621			0	0	0	0	0	1	1	1	1	1.24463	NA	NA	NA	NA	NA	NA	NA	NA	NA	NA
Pf3D7_01_v3	473119	A	-620			0	0	0	0	0	1	1	1	1	1.24463	NA	NA	NA	NA	NA	NA	NA	NA	NA	NA
Pf3D7_01_v3	473120	T	-619			0	0	0	1	0	0	1	1	1.20921	1	NA	NA	NA	NA	NA	NA	NA	NA	NA	NA
Pf3D7_01_v3	473121	T	-618			0	0	0	0	0	0	1	1	1	1	NA	NA	NA	NA	NA	NA	NA	NA	NA	NA
Pf3D7_01_v3	473123	A	-616			0	0	0	0	0	0	1	1	1	1	NA	NA	NA	NA	NA	NA	NA	NA	NA	NA
Pf3D7_01_v3	473124	A	-615			0	0	0	0	0	3	1	1	1	1.73389	NA	NA	NA	NA	NA	NA	NA	NA	NA	NA
Pf3D7_01_v3	473125	T	-614			0	0	0	1	0	0	1	1	1.20921	1	NA	NA	NA	NA	NA	NA	NA	NA	NA	NA
Pf3D7_01_v3	473126	T	-613			0	0	0	0	0	1	1	1	1	1.24463	NA	NA	NA	NA	NA	NA	NA	NA	NA	NA
Pf3D7_01_v3	473129	A	-610			0	0	0	0	0	0	1	1	1	1	NA	NA	NA	NA	NA	NA	NA	NA	NA	NA
Pf3D7_01_v3	473130	T	-609			0	0	0	0	0	0	1	1	1	1	NA	NA	NA	NA	NA	NA	NA	NA	NA	NA
Pf3D7_01_v3	473131	T	-608			0	0	0	0	0	0	1	1	1	1	NA	NA	NA	NA	NA	NA	NA	NA	NA	NA
Pf3D7_01_v3	473132	A	-607			0	0	0	0	0	0	1	1	1	1	NA	NA	NA	NA	NA	NA	NA	NA	NA	NA
Pf3D7_01_v3	473134	T	-605			0	0	0	1	0	0	1	1	1.20921	1	NA	NA	NA	NA	NA	NA	NA	NA	NA	NA
Pf3D7_01_v3	473135	A	-604			0	0	0	0	0	0	1	1	1	1	NA	NA	NA	NA	NA	NA	NA	NA	NA	NA
Pf3D7_01_v3	473136	T	-603			0	0	0	0	0	0	1	1	1	1	NA	NA	NA	NA	NA	NA	NA	NA	NA	NA
Pf3D7_01_v3	473137	T	-602			0	0	0	0	0	0	1	1	1	1	NA	NA	NA	NA	NA	NA	NA	NA	NA	NA
Pf3D7_01_v3	473139	T	-600			0	0	0	0	0	0	1	1	1	1	NA	NA	NA	NA	NA	NA	NA	NA	NA	NA
Pf3D7_01_v3	473141	T	-598			0	0	0	0	0	0	1	1	1	1	NA	NA	NA	NA	NA	NA	NA	NA	NA	NA
Pf3D7_01_v3	473143	G	-596			0	1	0	0	0	1	0.741745	0.741745	1	1.24463	NA	NA	NA	NA	NA	NA	NA	NA	NA	NA
Pf3D7_01_v3	473144	A	-595			0	0	0	0	0	0	1	1	1	1	NA	NA	NA	NA	NA	NA	NA	NA	NA	NA
Pf3D7_01_v3	473145	T	-594			0	0	0	0	0	0	1	1	1	1	NA	NA	NA	NA	NA	NA	NA	NA	NA	NA
Pf3D7_01_v3	473148	C	-591			1	0	0	0	0	0	1.2	1	1	1	NA	NA	NA	NA	NA	NA	NA	NA	NA	NA
Pf3D7_01_v3	473149	A	-590			0	0	0	0	0	0	1	1	1	1	NA	NA	NA	NA	NA	NA	NA	NA	NA	NA
Pf3D7_01_v3	473150	A	-589			0	0	0	0	0	0	1	1	1	1	NA	NA	NA	NA	NA	NA	NA	NA	NA	NA
Pf3D7_01_v3	473151	T	-588			0	0	0	0	0	0	1	1	1	1	NA	NA	NA	NA	NA	NA	NA	NA	NA	NA
Pf3D7_01_v3	473152	T	-587			0	0	0	0	0	0	1	1	1	1	NA	NA	NA	NA	NA	NA	NA	NA	NA	NA
Pf3D7_01_v3	473156	A	-583			0	0	0	0	0	0	1	1	1	1	NA	NA	NA	NA	NA	NA	NA	NA	NA	NA
Pf3D7_01_v3	473157	T	-582			0	0	0	0	0	0	1	1	1	1	NA	NA	NA	NA	NA	NA	NA	NA	NA	NA
Pf3D7_01_v3	473158	A	-581			1	0	0	0	0	0	1.2	1	1	1	NA	NA	NA	NA	NA	NA	NA	NA	NA	NA
Pf3D7_01_v3	473159	T	-580			0	0	0	0	0	0	1	1	1	1	NA	NA	NA	NA	NA	NA	NA	NA	NA	NA
Pf3D7_01_v3	473160	A	-579			0	0	0	0	0	0	1	1	1	1	NA	NA	NA	NA	NA	NA	NA	NA	NA	NA
Pf3D7_01_v3	473162	T	-577			0	0	0	0	0	0	1	1	1	1	NA	NA	NA	NA	NA	NA	NA	NA	NA	NA
Pf3D7_01_v3	473163	T	-576			1	0	0	0	0	0	1.2	1	1	1	NA	NA	NA	NA	NA	NA	NA	NA	NA	NA
Pf3D7_01_v3	473165	A	-574			0	0	0	0	0	1	1	1	1	1.24463	NA	NA	NA	NA	NA	NA	NA	NA	NA	NA
Pf3D7_01_v3	473166	A	-573			0	0	0	0	0	0	1	1	1	1	NA	NA	NA	NA	NA	NA	NA	NA	NA	NA
Pf3D7_01_v3	473168	T	-571			0	0	0	0	0	0	1	1	1	1	NA	NA	NA	NA	NA	NA	NA	NA	NA	NA
Pf3D7_01_v3	473170	A	-569			0	0	0	0	0	0	1	1	1	1	NA	NA	NA	NA	NA	NA	NA	NA	NA	NA
Pf3D7_01_v3	473171	T	-568			1	0	0	0	1	0	1.2	1	0.796748	0.796748	NA	NA	NA	NA	NA	NA	NA	NA	NA	NA
Pf3D7_01_v3	473172	T	-567			0	0	0	0	0	0	1	1	1	1	NA	NA	NA	NA	NA	NA	NA	NA	NA	NA
Pf3D7_01_v3	473173	C	-566			0	0	0	0	1	0	1	1	0.796748	0.796748	NA	NA	NA	NA	NA	NA	NA	NA	NA	NA
Pf3D7_01_v3	473174	A	-565			0	0	0	0	0	0	1	1	1	1	NA	NA	NA	NA	NA	NA	NA	NA	NA	NA
Pf3D7_01_v3	473175	T	-564			0	0	0	0	0	0	1	1	1	1	NA	NA	NA	NA	NA	NA	NA	NA	NA	NA
Pf3D7_01_v3	473176	A	-563			0	0	0	0	1	0	1	1	0.796748	0.796748	NA	NA	NA	NA	NA	NA	NA	NA	NA	NA
Pf3D7_01_v3	473177	T	-562			0	1	0	0	0	0	0.741745	0.741745	1	1	NA	NA	NA	NA	NA	NA	NA	NA	NA	NA
Pf3D7_01_v3	473178	A	-561			1	0	0	0	0	0	1.2	1	1	1	NA	NA	NA	NA	NA	NA	NA	NA	NA	NA
Pf3D7_01_v3	473179	A	-560			0	0	0	0	2	0	1	1	0.662162	0.662162	NA	NA	NA	NA	NA	NA	NA	NA	NA	NA
Pf3D7_01_v3	473180	A	-559			1	0	0	0	0	0	1.2	1	1	1	NA	NA	NA	NA	NA	NA	NA	NA	NA	NA
Pf3D7_01_v3	473182	T	-557			0	0	0	0	0	0	1	1	1	1	NA	NA	NA	NA	NA	NA	NA	NA	NA	NA
Pf3D7_01_v3	473183	T	-556			0	0	0	1	0	0	1	1	1.20921	1	NA	NA	NA	NA	NA	NA	NA	NA	NA	NA
Pf3D7_01_v3	473184	A	-555			0	0	0	1	0	0	1	1	1.20921	1	NA	NA	NA	NA	NA	NA	NA	NA	NA	NA
Pf3D7_01_v3	473185	T	-554			0	0	0	0	1	0	1	1	0.796748	0.796748	NA	NA	NA	NA	NA	NA	NA	NA	NA	NA
Pf3D7_01_v3	473186	A	-553			0	0	0	0	0	0	1	1	1	1	NA	NA	NA	NA	NA	NA	NA	NA	NA	NA
Pf3D7_01_v3	473187	T	-552			0	1	1	1	0	1	0.741745	0.892835	1.20921	1.24463	NA	NA	NA	NA	NA	NA	NA	NA	NA	NA
Pf3D7_01_v3	473188	A	-551			0	0	0	1	0	0	1	1	1.20921	1	NA	NA	NA	NA	NA	NA	NA	NA	NA	NA
Pf3D7_01_v3	473189	A	-550			1	0	0	0	0	4	1.2	1	1	1.97852	NA	NA	NA	NA	NA	NA	NA	NA	NA	NA
Pf3D7_01_v3	473190	A	-549			0	0	0	0	0	2	1	1	1	1.48926	NA	NA	NA	NA	NA	NA	NA	NA	NA	NA
Pf3D7_01_v3	473191	T	-548			0	0	0	2	1	1	1	1	1.13013	0.991657	NA	NA	NA	NA	NA	NA	NA	NA	NA	NA
Pf3D7_01_v3	473192	A	-547			0	0	0	1	0	0	1	1	1.20921	1	NA	NA	NA	NA	NA	NA	NA	NA	NA	NA
Pf3D7_01_v3	473193	T	-546			0	0	0	0	0	2	1	1	1	1.48926	NA	NA	NA	NA	NA	NA	NA	NA	NA	NA
Pf3D7_01_v3	473194	G	-545			1	0	0	0	1	1	1.2	1	0.796748	0.991657	NA	NA	NA	NA	NA	NA	NA	NA	NA	NA
Pf3D7_01_v3	473195	T	-544			0	0	0	0	2	0	1	1	0.662162	0.662162	NA	NA	NA	NA	NA	NA	NA	NA	NA	NA
Pf3D7_01_v3	473196	A	-543			0	0	0	0	1	0	1	1	0.796748	0.796748	NA	NA	NA	NA	NA	NA	NA	NA	NA	NA
Pf3D7_01_v3	473197	A	-542			0	0	0	0	1	0	1	1	0.796748	0.796748	NA	NA	NA	NA	NA	NA	NA	NA	NA	NA
Pf3D7_01_v3	473199	A	-540			0	0	1	0	2	0	1	1.2037	0.662162	0.662162	NA	NA	NA	NA	NA	NA	NA	NA	NA	NA
Pf3D7_01_v3	473201	T	-538			0	0	0	1	0	0	1	1	1.20921	1	NA	NA	NA	NA	NA	NA	NA	NA	NA	NA
Pf3D7_01_v3	473202	A	-537			0	0	0	0	0	1	1	1	1	1.24463	NA	NA	NA	NA	NA	NA	NA	NA	NA	NA
Pf3D7_01_v3	473203	A	-536			0	0	0	1	0	0	1	1	1.20921	1	NA	NA	NA	NA	NA	NA	NA	NA	NA	NA
Pf3D7_01_v3	473205	T	-534			0	0	1	0	0	2	1	1.2037	1	1.48926	NA	NA	NA	NA	NA	NA	NA	NA	NA	NA
Pf3D7_01_v3	473206	T	-533			0	0	0	1	0	1	1	1	1.20921	1.24463	NA	NA	NA	NA	NA	NA	NA	NA	NA	NA
Pf3D7_01_v3	473207	T	-532			0	0	0	1	6	2	1	1	0.477834	0.588499	NA	NA	NA	NA	NA	NA	NA	NA	NA	NA
Pf3D7_01_v3	473208	A	-531			2	0	0	0	0	0	1.4	1	1	1	NA	NA	NA	NA	NA	NA	NA	NA	NA	NA
Pf3D7_01_v3	473210	G	-529			0	0	0	0	0	1	1	1	1	1.24463	NA	NA	NA	NA	NA	NA	NA	NA	NA	NA
Pf3D7_01_v3	473212	A	-527			0	0	0	0	0	1	1	1	1	1.24463	NA	NA	NA	NA	NA	NA	NA	NA	NA	NA
Pf3D7_01_v3	473213	A	-526			0	0	0	0	1	1	1	1	0.796748	0.991657	NA	NA	NA	NA	NA	NA	NA	NA	NA	NA
Pf3D7_01_v3	473214	T	-525			0	0	0	2	1	1	1	1	1.13013	0.991657	NA	NA	NA	NA	NA	NA	NA	NA	NA	NA
Pf3D7_01_v3	473215	A	-524			0	0	0	0	0	1	1	1	1	1.24463	NA	NA	NA	NA	NA	NA	NA	NA	NA	NA
Pf3D7_01_v3	473216	T	-523			0	0	0	0	0	1	1	1	1	1.24463	NA	NA	NA	NA	NA	NA	NA	NA	NA	NA
Pf3D7_01_v3	473217	A	-522			0	1	0	0	0	1	0.741745	0.741745	1	1.24463	NA	NA	NA	NA	NA	NA	NA	NA	NA	NA
Pf3D7_01_v3	473218	T	-521			0	0	0	0	0	1	1	1	1	1.24463	NA	NA	NA	NA	NA	NA	NA	NA	NA	NA
Pf3D7_01_v3	473219	A	-520			0	0	1	1	0	0	1	1.2037	1.20921	1	NA	NA	NA	NA	NA	NA	NA	NA	NA	NA
Pf3D7_01_v3	473220	A	-519			3	0	0	4	0	1	1.6	1	1.83685	1.24463	NA	NA	NA	NA	NA	NA	NA	NA	NA	NA
Pf3D7_01_v3	473221	T	-518			0	0	0	1	0	0	1	1	1.20921	1	NA	NA	NA	NA	NA	NA	NA	NA	NA	NA
Pf3D7_01_v3	473222	A	-517			0	1	0	0	4	0	0.741745	0.741745	0.49495	0.49495	NA	NA	NA	NA	NA	NA	NA	NA	NA	NA
Pf3D7_01_v3	473223	A	-516			0	0	1	0	0	6	1	1.2037	1	2.46778	NA	NA	NA	NA	NA	NA	NA	NA	NA	NA
Pf3D7_01_v3	473224	T	-515			4	2	2	1	2	0	1.06111	0.829661	0.800695	0.662162	NA	NA	NA	NA	NA	NA	NA	NA	NA	NA
Pf3D7_01_v3	473225	A	-514			0	0	2	0	0	0	1	1.40739	1	1	NA	NA	NA	NA	NA	NA	NA	NA	NA	NA
Pf3D7_01_v3	473226	A	-513			0	0	0	1	0	1	1	1	1.20921	1.24463	NA	NA	NA	NA	NA	NA	NA	NA	NA	NA
Pf3D7_01_v3	473227	C	-512			0	0	0	3	0	4	1	1	1.62764	1.97852	NA	NA	NA	NA	NA	NA	NA	NA	NA	NA
Pf3D7_01_v3	473228	T	-511			1	0	1	0	0	0	1.2	1.2037	1	1	NA	NA	NA	NA	NA	NA	NA	NA	NA	NA
Pf3D7_01_v3	473229	T	-510			0	0	0	0	1	0	1	1	0.796748	0.796748	NA	NA	NA	NA	NA	NA	NA	NA	NA	NA
Pf3D7_01_v3	473230	T	-509			0	0	0	0	0	0	1	1	1	1	NA	NA	NA	NA	NA	NA	NA	NA	NA	NA
Pf3D7_01_v3	473231	G	-508			1	0	0	0	0	2	1.2	1	1	1.48926	NA	NA	NA	NA	NA	NA	NA	NA	NA	NA
Pf3D7_01_v3	473233	A	-506			0	0	2	4	0	1	1	1.40739	1.83685	1.24463	NA	NA	NA	NA	NA	NA	NA	NA	NA	NA
Pf3D7_01_v3	473234	A	-505			1	0	1	2	1	1	1.2	1.2037	1.13013	0.991657	NA	NA	NA	NA	NA	NA	NA	NA	NA	NA
Pf3D7_01_v3	473235	T	-504			0	0	2	1	0	0	1	1.40739	1.20921	1	NA	NA	NA	NA	NA	NA	NA	NA	NA	NA
Pf3D7_01_v3	473236	A	-503			1	0	2	1	0	2	1.2	1.40739	1.20921	1.48926	NA	NA	NA	NA	NA	NA	NA	NA	NA	NA
Pf3D7_01_v3	473237	T	-502			0	0	0	2	0	3	1	1	1.41843	1.73389	NA	NA	NA	NA	NA	NA	NA	NA	NA	NA
Pf3D7_01_v3	473238	A	-501			0	0	0	0	0	4	1	1	1	1.97852	NA	NA	NA	NA	NA	NA	NA	NA	NA	NA
Pf3D7_01_v3	473239	A	-500			1	0	0	1	0	0	1.2	1	1.20921	1	NA	NA	NA	NA	NA	NA	NA	NA	NA	NA
Pf3D7_01_v3	473240	A	-499			0	0	1	0	0	2	1	1.2037	1	1.48926	NA	NA	NA	NA	NA	NA	NA	NA	NA	NA
Pf3D7_01_v3	473241	A	-498			0	0	0	0	0	2	1	1	1	1.48926	NA	NA	NA	NA	NA	NA	NA	NA	NA	NA
Pf3D7_01_v3	473242	C	-497			2	0	1	0	2	1	1.4	1.2037	0.662162	0.824148	NA	NA	NA	NA	NA	NA	NA	NA	NA	NA
Pf3D7_01_v3	473243	A	-496			0	0	0	1	0	0	1	1	1.20921	1	NA	NA	NA	NA	NA	NA	NA	NA	NA	NA
Pf3D7_01_v3	473244	T	-495			0	0	2	0	0	0	1	1.40739	1	1	NA	NA	NA	NA	NA	NA	NA	NA	NA	NA
Pf3D7_01_v3	473246	A	-493			0	0	0	4	2	1	1	1	1.21629	0.824148	NA	NA	NA	NA	NA	NA	NA	NA	NA	NA
Pf3D7_01_v3	473247	A	-492			0	0	0	0	0	2	1	1	1	1.48926	NA	NA	NA	NA	NA	NA	NA	NA	NA	NA
Pf3D7_01_v3	473248	T	-491			0	0	0	0	0	1	1	1	1	1.24463	NA	NA	NA	NA	NA	NA	NA	NA	NA	NA
Pf3D7_01_v3	473250	G	-489			0	0	1	1	0	2	1	1.2037	1.20921	1.48926	NA	NA	NA	NA	NA	NA	NA	NA	NA	NA
Pf3D7_01_v3	473253	G	-486			0	0	0	1	0	2	1	1	1.20921	1.48926	NA	NA	NA	NA	NA	NA	NA	NA	NA	NA
Pf3D7_01_v3	473254	T	-485			0	0	0	0	1	0	1	1	0.796748	0.796748	NA	NA	NA	NA	NA	NA	NA	NA	NA	NA
Pf3D7_01_v3	473255	T	-484			0	0	0	1	0	0	1	1	1.20921	1	NA	NA	NA	NA	NA	NA	NA	NA	NA	NA
Pf3D7_01_v3	473256	G	-483			0	0	0	0	0	0	1	1	1	1	NA	NA	NA	NA	NA	NA	NA	NA	NA	NA
Pf3D7_01_v3	473258	C	-481			0	1	0	0	0	0	0.741745	0.741745	1	1	NA	NA	NA	NA	NA	NA	NA	NA	NA	NA
Pf3D7_01_v3	473260	T	-479			1	0	0	0	0	2	1.2	1	1	1.48926	NA	NA	NA	NA	NA	NA	NA	NA	NA	NA
Pf3D7_01_v3	473262	T	-477			1	0	0	1	0	0	1.2	1	1.20921	1	NA	NA	NA	NA	NA	NA	NA	NA	NA	NA
Pf3D7_01_v3	473263	A	-476			0	0	0	0	2	0	1	1	0.662162	0.662162	NA	NA	NA	NA	NA	NA	NA	NA	NA	NA
Pf3D7_01_v3	473264	T	-475			0	0	0	0	0	2	1	1	1	1.48926	NA	NA	NA	NA	NA	NA	NA	NA	NA	NA
Pf3D7_01_v3	473265	A	-474			0	0	0	1	0	0	1	1	1.20921	1	NA	NA	NA	NA	NA	NA	NA	NA	NA	NA
Pf3D7_01_v3	473266	G	-473			0	1	0	1	0	0	0.741745	0.741745	1.20921	1	NA	NA	NA	NA	NA	NA	NA	NA	NA	NA
Pf3D7_01_v3	473268	T	-471			1	1	0	0	0	0	0.890094	0.741745	1	1	NA	NA	NA	NA	NA	NA	NA	NA	NA	NA
Pf3D7_01_v3	473271	G	-468			0	0	0	0	0	1	1	1	1	1.24463	NA	NA	NA	NA	NA	NA	NA	NA	NA	NA
Pf3D7_01_v3	473272	A	-467			1	0	0	1	0	0	1.2	1	1.20921	1	NA	NA	NA	NA	NA	NA	NA	NA	NA	NA
Pf3D7_01_v3	473277	A	-462			0	0	0	0	0	0	1	1	1	1	NA	NA	NA	NA	NA	NA	NA	NA	NA	NA
Pf3D7_01_v3	473278	T	-461			0	0	0	1	0	0	1	1	1.20921	1	NA	NA	NA	NA	NA	NA	NA	NA	NA	NA
Pf3D7_01_v3	473279	A	-460			0	0	0	1	0	0	1	1	1.20921	1	NA	NA	NA	NA	NA	NA	NA	NA	NA	NA
Pf3D7_01_v3	473280	T	-459			0	0	0	1	0	0	1	1	1.20921	1	NA	NA	NA	NA	NA	NA	NA	NA	NA	NA
Pf3D7_01_v3	473281	A	-458			0	1	0	0	0	0	0.741745	0.741745	1	1	NA	NA	NA	NA	NA	NA	NA	NA	NA	NA
Pf3D7_01_v3	473282	A	-457			0	1	0	0	0	0	0.741745	0.741745	1	1	NA	NA	NA	NA	NA	NA	NA	NA	NA	NA
Pf3D7_01_v3	473283	A	-456			0	0	0	0	0	0	1	1	1	1	NA	NA	NA	NA	NA	NA	NA	NA	NA	NA
Pf3D7_01_v3	473284	T	-455			0	0	0	0	1	0	1	1	0.796748	0.796748	NA	NA	NA	NA	NA	NA	NA	NA	NA	NA
Pf3D7_01_v3	473285	A	-454			0	0	0	0	0	0	1	1	1	1	NA	NA	NA	NA	NA	NA	NA	NA	NA	NA
Pf3D7_01_v3	473286	A	-453			0	0	0	2	0	1	1	1	1.41843	1.24463	NA	NA	NA	NA	NA	NA	NA	NA	NA	NA
Pf3D7_01_v3	473288	A	-451			0	0	0	3	0	1	1	1	1.62764	1.24463	NA	NA	NA	NA	NA	NA	NA	NA	NA	NA
Pf3D7_01_v3	473289	T	-450			0	0	0	0	1	0	1	1	0.796748	0.796748	NA	NA	NA	NA	NA	NA	NA	NA	NA	NA
Pf3D7_01_v3	473290	A	-449			0	0	0	0	0	0	1	1	1	1	NA	NA	NA	NA	NA	NA	NA	NA	NA	NA
Pf3D7_01_v3	473291	G	-448			0	0	1	1	0	1	1	1.2037	1.20921	1.24463	NA	NA	NA	NA	NA	NA	NA	NA	NA	NA
Pf3D7_01_v3	473292	A	-447			1	0	0	0	0	5	1.2	1	1	2.22315	NA	NA	NA	NA	NA	NA	NA	NA	NA	NA
Pf3D7_01_v3	473293	T	-446			0	0	0	0	1	0	1	1	0.796748	0.796748	NA	NA	NA	NA	NA	NA	NA	NA	NA	NA
Pf3D7_01_v3	473294	T	-445			0	0	0	0	1	0	1	1	0.796748	0.796748	NA	NA	NA	NA	NA	NA	NA	NA	NA	NA
Pf3D7_01_v3	473295	A	-444			0	0	0	0	0	0	1	1	1	1	NA	NA	NA	NA	NA	NA	NA	NA	NA	NA
Pf3D7_01_v3	473296	T	-443			0	0	0	0	2	0	1	1	0.662162	0.662162	NA	NA	NA	NA	NA	NA	NA	NA	NA	NA
Pf3D7_01_v3	473298	A	-441			0	1	0	2	0	0	0.741745	0.741745	1.41843	1	NA	NA	NA	NA	NA	NA	NA	NA	NA	NA
Pf3D7_01_v3	473301	G	-438			1	2	0	0	0	0	0.707403	0.589503	1	1	NA	NA	NA	NA	NA	NA	NA	NA	NA	NA
Pf3D7_01_v3	473303	T	-436			0	2	0	1	1	1	0.589503	0.589503	0.963438	0.991657	NA	NA	NA	NA	NA	NA	NA	NA	NA	NA
Pf3D7_01_v3	473304	A	-435			0	0	0	0	0	0	1	1	1	1	NA	NA	NA	NA	NA	NA	NA	NA	NA	NA
Pf3D7_01_v3	473305	T	-434			0	0	0	0	0	0	1	1	1	1	NA	NA	NA	NA	NA	NA	NA	NA	NA	NA
Pf3D7_01_v3	473306	C	-433			0	0	0	0	2	0	1	1	0.662162	0.662162	NA	NA	NA	NA	NA	NA	NA	NA	NA	NA
Pf3D7_01_v3	473307	T	-432			0	0	0	0	2	0	1	1	0.662162	0.662162	NA	NA	NA	NA	NA	NA	NA	NA	NA	NA
Pf3D7_01_v3	473308	T	-431			0	0	0	0	0	0	1	1	1	1	NA	NA	NA	NA	NA	NA	NA	NA	NA	NA
Pf3D7_01_v3	473309	A	-430			0	2	0	0	0	0	0.589503	0.589503	1	1	NA	NA	NA	NA	NA	NA	NA	NA	NA	NA
Pf3D7_01_v3	473310	T	-429			0	0	0	0	1	0	1	1	0.796748	0.796748	NA	NA	NA	NA	NA	NA	NA	NA	NA	NA
Pf3D7_01_v3	473312	C	-427			0	0	0	1	0	0	1	1	1.20921	1	NA	NA	NA	NA	NA	NA	NA	NA	NA	NA
Pf3D7_01_v3	473315	A	-424			0	0	0	0	0	0	1	1	1	1	NA	NA	NA	NA	NA	NA	NA	NA	NA	NA
Pf3D7_01_v3	473317	A	-422			0	0	0	1	0	0	1	1	1.20921	1	NA	NA	NA	NA	NA	NA	NA	NA	NA	NA
Pf3D7_01_v3	473318	T	-421			0	0	0	3	0	0	1	1	1.62764	1	NA	NA	NA	NA	NA	NA	NA	NA	NA	NA
Pf3D7_01_v3	473319	A	-420			0	0	0	0	1	1	1	1	0.796748	0.991657	NA	NA	NA	NA	NA	NA	NA	NA	NA	NA
Pf3D7_01_v3	473320	A	-419			0	0	0	0	2	1	1	1	0.662162	0.824148	NA	NA	NA	NA	NA	NA	NA	NA	NA	NA
Pf3D7_01_v3	473322	A	-417			0	0	0	3	2	4	1	1	1.07776	1.3101	NA	NA	NA	NA	NA	NA	NA	NA	NA	NA
Pf3D7_01_v3	473323	A	-416			0	0	0	0	0	1	1	1	1	1.24463	NA	NA	NA	NA	NA	NA	NA	NA	NA	NA
Pf3D7_01_v3	473324	T	-415			0	0	0	0	0	0	1	1	1	1	NA	NA	NA	NA	NA	NA	NA	NA	NA	NA
Pf3D7_01_v3	473325	A	-414			0	0	0	2	0	0	1	1	1.41843	1	NA	NA	NA	NA	NA	NA	NA	NA	NA	NA
Pf3D7_01_v3	473326	T	-413			0	0	0	0	0	1	1	1	1	1.24463	NA	NA	NA	NA	NA	NA	NA	NA	NA	NA
Pf3D7_01_v3	473329	T	-410			0	0	0	2	0	0	1	1	1.41843	1	NA	NA	NA	NA	NA	NA	NA	NA	NA	NA
Pf3D7_01_v3	473330	T	-409			0	0	0	0	0	2	1	1	1	1.48926	NA	NA	NA	NA	NA	NA	NA	NA	NA	NA
Pf3D7_01_v3	473332	A	-407			0	1	1	0	2	0	0.741745	0.892835	0.662162	0.662162	NA	NA	NA	NA	NA	NA	NA	NA	NA	NA
Pf3D7_01_v3	473334	C	-405			1	0	0	0	0	0	1.2	1	1	1	NA	NA	NA	NA	NA	NA	NA	NA	NA	NA
Pf3D7_01_v3	473336	T	-403			0	0	0	0	0	1	1	1	1	1.24463	NA	NA	NA	NA	NA	NA	NA	NA	NA	NA
Pf3D7_01_v3	473337	T	-402			0	1	0	2	0	0	0.741745	0.741745	1.41843	1	NA	NA	NA	NA	NA	NA	NA	NA	NA	NA
Pf3D7_01_v3	473338	T	-401			1	0	1	0	3	2	1.2	1.2037	0.566474	0.843628	NA	NA	NA	NA	NA	NA	NA	NA	NA	NA
Pf3D7_01_v3	473340	C	-399			0	0	0	0	0	1	1	1	1	1.24463	NA	NA	NA	NA	NA	NA	NA	NA	NA	NA
Pf3D7_01_v3	473341	A	-398			1	0	0	0	0	0	1.2	1	1	1	NA	NA	NA	NA	NA	NA	NA	NA	NA	NA
Pf3D7_01_v3	473344	A	-395			0	0	1	0	0	2	1	1.2037	1	1.48926	NA	NA	NA	NA	NA	NA	NA	NA	NA	NA
Pf3D7_01_v3	473345	T	-394			0	0	0	0	1	1	1	1	0.796748	0.991657	NA	NA	NA	NA	NA	NA	NA	NA	NA	NA
Pf3D7_01_v3	473346	G	-393			0	0	1	1	0	1	1	1.2037	1.20921	1.24463	NA	NA	NA	NA	NA	NA	NA	NA	NA	NA
Pf3D7_01_v3	473347	T	-392			0	0	0	0	0	0	1	1	1	1	NA	NA	NA	NA	NA	NA	NA	NA	NA	NA
Pf3D7_01_v3	473349	G	-390			0	0	0	0	0	0	1	1	1	1	NA	NA	NA	NA	NA	NA	NA	NA	NA	NA
Pf3D7_01_v3	473350	A	-389			0	0	0	0	0	0	1	1	1	1	NA	NA	NA	NA	NA	NA	NA	NA	NA	NA
Pf3D7_01_v3	473351	T	-388			0	0	0	0	0	1	1	1	1	1.24463	NA	NA	NA	NA	NA	NA	NA	NA	NA	NA
Pf3D7_01_v3	473352	A	-387			0	0	0	0	0	4	1	1	1	1.97852	NA	NA	NA	NA	NA	NA	NA	NA	NA	NA
Pf3D7_01_v3	473353	T	-386			1	0	0	0	0	0	1.2	1	1	1	NA	NA	NA	NA	NA	NA	NA	NA	NA	NA
Pf3D7_01_v3	473354	A	-385			0	0	0	0	0	1	1	1	1	1.24463	NA	NA	NA	NA	NA	NA	NA	NA	NA	NA
Pf3D7_01_v3	473355	T	-384			0	0	0	0	0	0	1	1	1	1	NA	NA	NA	NA	NA	NA	NA	NA	NA	NA
Pf3D7_01_v3	473356	T	-383			0	0	1	0	1	0	1	1.2037	0.796748	0.796748	NA	NA	NA	NA	NA	NA	NA	NA	NA	NA
Pf3D7_01_v3	473358	A	-381			0	0	0	1	0	0	1	1	1.20921	1	NA	NA	NA	NA	NA	NA	NA	NA	NA	NA
Pf3D7_01_v3	473361	T	-378			0	0	0	1	0	0	1	1	1.20921	1	NA	NA	NA	NA	NA	NA	NA	NA	NA	NA
Pf3D7_01_v3	473362	T	-377			2	0	0	0	0	0	1.4	1	1	1	NA	NA	NA	NA	NA	NA	NA	NA	NA	NA
Pf3D7_01_v3	473363	T	-376			0	0	0	0	0	2	1	1	1	1.48926	NA	NA	NA	NA	NA	NA	NA	NA	NA	NA
Pf3D7_01_v3	473364	A	-375			0	0	0	0	0	0	1	1	1	1	NA	NA	NA	NA	NA	NA	NA	NA	NA	NA
Pf3D7_01_v3	473367	C	-372			0	1	0	0	0	0	0.741745	0.741745	1	1	NA	NA	NA	NA	NA	NA	NA	NA	NA	NA
Pf3D7_01_v3	473369	T	-370			0	0	0	0	0	1	1	1	1	1.24463	NA	NA	NA	NA	NA	NA	NA	NA	NA	NA
Pf3D7_01_v3	473370	T	-369			0	0	0	0	0	0	1	1	1	1	NA	NA	NA	NA	NA	NA	NA	NA	NA	NA
Pf3D7_01_v3	473372	T	-367			0	0	0	2	0	0	1	1	1.41843	1	NA	NA	NA	NA	NA	NA	NA	NA	NA	NA
Pf3D7_01_v3	473373	T	-366			0	0	0	1	0	1	1	1	1.20921	1.24463	NA	NA	NA	NA	NA	NA	NA	NA	NA	NA
Pf3D7_01_v3	473376	T	-363			0	0	0	0	0	2	1	1	1	1.48926	NA	NA	NA	NA	NA	NA	NA	NA	NA	NA
Pf3D7_01_v3	473378	T	-361			1	1	0	0	0	0	0.890094	0.741745	1	1	NA	NA	NA	NA	NA	NA	NA	NA	NA	NA
Pf3D7_01_v3	473382	A	-357			0	1	0	0	0	0	0.741745	0.741745	1	1	NA	NA	NA	NA	NA	NA	NA	NA	NA	NA
Pf3D7_01_v3	473383	C	-356			0	0	0	0	0	0	1	1	1	1	NA	NA	NA	NA	NA	NA	NA	NA	NA	NA
Pf3D7_01_v3	473386	A	-353			1	0	0	0	0	0	1.2	1	1	1	NA	NA	NA	NA	NA	NA	NA	NA	NA	NA
Pf3D7_01_v3	473387	T	-352			0	0	0	0	0	3	1	1	1	1.73389	NA	NA	NA	NA	NA	NA	NA	NA	NA	NA
Pf3D7_01_v3	473391	T	-348			0	0	0	1	0	0	1	1	1.20921	1	NA	NA	NA	NA	NA	NA	NA	NA	NA	NA
Pf3D7_01_v3	473395	T	-344			0	0	0	0	1	0	1	1	0.796748	0.796748	NA	NA	NA	NA	NA	NA	NA	NA	NA	NA
Pf3D7_01_v3	473398	A	-341			0	0	0	0	0	0	1	1	1	1	NA	NA	NA	NA	NA	NA	NA	NA	NA	NA
Pf3D7_01_v3	473399	A	-340			0	0	0	0	1	1	1	1	0.796748	0.991657	NA	NA	NA	NA	NA	NA	NA	NA	NA	NA
Pf3D7_01_v3	473400	A	-339			0	0	0	1	0	0	1	1	1.20921	1	NA	NA	NA	NA	NA	NA	NA	NA	NA	NA
Pf3D7_01_v3	473402	T	-337			0	0	2	0	0	0	1	1.40739	1	1	NA	NA	NA	NA	NA	NA	NA	NA	NA	NA
Pf3D7_01_v3	473403	T	-336			0	0	0	1	0	0	1	1	1.20921	1	NA	NA	NA	NA	NA	NA	NA	NA	NA	NA
Pf3D7_01_v3	473404	A	-335			0	0	0	1	0	0	1	1	1.20921	1	NA	NA	NA	NA	NA	NA	NA	NA	NA	NA
Pf3D7_01_v3	473405	T	-334			0	0	0	0	1	0	1	1	0.796748	0.796748	NA	NA	NA	NA	NA	NA	NA	NA	NA	NA
Pf3D7_01_v3	473407	A	-332			0	1	0	0	0	0	0.741745	0.741745	1	1	NA	NA	NA	NA	NA	NA	NA	NA	NA	NA
Pf3D7_01_v3	473408	T	-331			0	0	0	0	3	0	1	1	0.566474	0.566474	NA	NA	NA	NA	NA	NA	NA	NA	NA	NA
Pf3D7_01_v3	473410	T	-329			1	0	0	0	0	0	1.2	1	1	1	NA	NA	NA	NA	NA	NA	NA	NA	NA	NA
Pf3D7_01_v3	473411	A	-328			0	0	0	0	0	0	1	1	1	1	NA	NA	NA	NA	NA	NA	NA	NA	NA	NA
Pf3D7_01_v3	473412	T	-327			0	0	0	0	2	0	1	1	0.662162	0.662162	NA	NA	NA	NA	NA	NA	NA	NA	NA	NA
Pf3D7_01_v3	473413	A	-326			1	0	0	0	1	0	1.2	1	0.796748	0.796748	NA	NA	NA	NA	NA	NA	NA	NA	NA	NA
Pf3D7_01_v3	473414	T	-325			0	0	0	1	0	0	1	1	1.20921	1	NA	NA	NA	NA	NA	NA	NA	NA	NA	NA
Pf3D7_01_v3	473419	C	-320			2	0	0	0	0	0	1.4	1	1	1	NA	NA	NA	NA	NA	NA	NA	NA	NA	NA
Pf3D7_01_v3	473420	A	-319			2	0	0	0	0	0	1.4	1	1	1	NA	NA	NA	NA	NA	NA	NA	NA	NA	NA
Pf3D7_01_v3	473425	T	-314			0	1	0	2	1	0	0.741745	0.741745	1.13013	0.796748	NA	NA	NA	NA	NA	NA	NA	NA	NA	NA
Pf3D7_01_v3	473427	T	-312			1	1	0	0	1	0	0.890094	0.741745	0.796748	0.796748	NA	NA	NA	NA	NA	NA	NA	NA	NA	NA
Pf3D7_01_v3	473429	T	-310			0	0	0	1	0	0	1	1	1.20921	1	NA	NA	NA	NA	NA	NA	NA	NA	NA	NA
Pf3D7_01_v3	473430	T	-309			0	0	0	1	1	0	1	1	0.963438	0.796748	NA	NA	NA	NA	NA	NA	NA	NA	NA	NA
Pf3D7_01_v3	473431	T	-308			2	0	0	0	0	0	1.4	1	1	1	NA	NA	NA	NA	NA	NA	NA	NA	NA	NA
Pf3D7_01_v3	473433	A	-306			1	2	0	0	0	0	0.707403	0.589503	1	1	NA	NA	NA	NA	NA	NA	NA	NA	NA	NA
Pf3D7_01_v3	473434	A	-305			0	0	0	1	1	1	1	1	0.963438	0.991657	NA	NA	NA	NA	NA	NA	NA	NA	NA	NA
Pf3D7_01_v3	473435	A	-304			1	0	0	0	0	0	1.2	1	1	1	NA	NA	NA	NA	NA	NA	NA	NA	NA	NA
Pf3D7_01_v3	473436	T	-303			0	0	0	0	3	0	1	1	0.566474	0.566474	NA	NA	NA	NA	NA	NA	NA	NA	NA	NA
Pf3D7_01_v3	473437	A	-302			3	0	0	1	0	0	1.6	1	1.20921	1	NA	NA	NA	NA	NA	NA	NA	NA	NA	NA
Pf3D7_01_v3	473438	T	-301			0	0	0	2	0	0	1	1	1.41843	1	NA	NA	NA	NA	NA	NA	NA	NA	NA	NA
Pf3D7_01_v3	473441	A	-298			0	0	0	1	0	0	1	1	1.20921	1	NA	NA	NA	NA	NA	NA	NA	NA	NA	NA
Pf3D7_01_v3	473442	A	-297			0	1	0	1	0	0	0.741745	0.741745	1.20921	1	NA	NA	NA	NA	NA	NA	NA	NA	NA	NA
Pf3D7_01_v3	473443	A	-296			0	0	0	1	0	0	1	1	1.20921	1	NA	NA	NA	NA	NA	NA	NA	NA	NA	NA
Pf3D7_01_v3	473444	T	-295			2	0	2	0	0	0	1.4	1.40739	1	1	NA	NA	NA	NA	NA	NA	NA	NA	NA	NA
Pf3D7_01_v3	473445	T	-294			0	0	0	2	3	0	1	1	0.803502	0.566474	NA	NA	NA	NA	NA	NA	NA	NA	NA	NA
Pf3D7_01_v3	473447	A	-292			0	0	0	0	2	0	1	1	0.662162	0.662162	NA	NA	NA	NA	NA	NA	NA	NA	NA	NA
Pf3D7_01_v3	473448	A	-291			0	0	0	0	0	2	1	1	1	1.48926	NA	NA	NA	NA	NA	NA	NA	NA	NA	NA
Pf3D7_01_v3	473449	A	-290			0	0	0	2	0	0	1	1	1.41843	1	NA	NA	NA	NA	NA	NA	NA	NA	NA	NA
Pf3D7_01_v3	473450	A	-289			0	0	0	1	0	0	1	1	1.20921	1	NA	NA	NA	NA	NA	NA	NA	NA	NA	NA
Pf3D7_01_v3	473451	T	-288			0	0	0	1	0	0	1	1	1.20921	1	NA	NA	NA	NA	NA	NA	NA	NA	NA	NA
Pf3D7_01_v3	473453	A	-286			0	0	0	0	1	0	1	1	0.796748	0.796748	NA	NA	NA	NA	NA	NA	NA	NA	NA	NA
Pf3D7_01_v3	473454	A	-285			0	0	0	0	0	1	1	1	1	1.24463	NA	NA	NA	NA	NA	NA	NA	NA	NA	NA
Pf3D7_01_v3	473457	A	-282			0	0	0	0	1	0	1	1	0.796748	0.796748	NA	NA	NA	NA	NA	NA	NA	NA	NA	NA
Pf3D7_01_v3	473461	A	-278			2	0	0	0	0	0	1.4	1	1	1	NA	NA	NA	NA	NA	NA	NA	NA	NA	NA
Pf3D7_01_v3	473462	T	-277			0	0	0	0	0	0	1	1	1	1	NA	NA	NA	NA	NA	NA	NA	NA	NA	NA
Pf3D7_01_v3	473463	A	-276			1	0	0	0	0	1	1.2	1	1	1.24463	NA	NA	NA	NA	NA	NA	NA	NA	NA	NA
Pf3D7_01_v3	473464	A	-275			0	0	0	0	1	0	1	1	0.796748	0.796748	NA	NA	NA	NA	NA	NA	NA	NA	NA	NA
Pf3D7_01_v3	473465	T	-274			0	1	0	0	3	0	0.741745	0.741745	0.566474	0.566474	NA	NA	NA	NA	NA	NA	NA	NA	NA	NA
Pf3D7_01_v3	473469	T	-270			0	0	0	0	1	1	1	1	0.796748	0.991657	NA	NA	NA	NA	NA	NA	NA	NA	NA	NA
Pf3D7_01_v3	473472	T	-267			0	0	0	1	0	0	1	1	1.20921	1	NA	NA	NA	NA	NA	NA	NA	NA	NA	NA
Pf3D7_01_v3	473474	T	-265			0	0	0	0	0	0	1	1	1	1	NA	NA	NA	NA	NA	NA	NA	NA	NA	NA
Pf3D7_01_v3	473475	T	-264			1	0	0	0	0	0	1.2	1	1	1	NA	NA	NA	NA	NA	NA	NA	NA	NA	NA
Pf3D7_01_v3	473480	G	-259			0	0	0	0	1	0	1	1	0.796748	0.796748	NA	NA	NA	NA	NA	NA	NA	NA	NA	NA
Pf3D7_01_v3	473481	G	-258			0	0	0	1	0	0	1	1	1.20921	1	NA	NA	NA	NA	NA	NA	NA	NA	NA	NA
Pf3D7_01_v3	473487	A	-252			0	0	0	0	0	0	1	1	1	1	NA	NA	NA	NA	NA	NA	NA	NA	NA	NA
Pf3D7_01_v3	473488	A	-251			0	0	0	2	0	1	1	1	1.41843	1.24463	NA	NA	NA	NA	NA	NA	NA	NA	NA	NA
Pf3D7_01_v3	473489	A	-250			0	0	0	1	0	0	1	1	1.20921	1	NA	NA	NA	NA	NA	NA	NA	NA	NA	NA
Pf3D7_01_v3	473490	T	-249			0	0	0	1	0	0	1	1	1.20921	1	NA	NA	NA	NA	NA	NA	NA	NA	NA	NA
Pf3D7_01_v3	473491	A	-248			0	2	1	0	2	0	0.589503	0.709582	0.662162	0.662162	NA	NA	NA	NA	NA	NA	NA	NA	NA	NA
Pf3D7_01_v3	473492	T	-247			0	0	0	1	0	0	1	1	1.20921	1	NA	NA	NA	NA	NA	NA	NA	NA	NA	NA
Pf3D7_01_v3	473495	T	-244			0	0	0	0	1	0	1	1	0.796748	0.796748	NA	NA	NA	NA	NA	NA	NA	NA	NA	NA
Pf3D7_01_v3	473496	A	-243			0	0	0	1	0	0	1	1	1.20921	1	NA	NA	NA	NA	NA	NA	NA	NA	NA	NA
Pf3D7_01_v3	473499	A	-240			0	0	1	0	1	0	1	1.2037	0.796748	0.796748	NA	NA	NA	NA	NA	NA	NA	NA	NA	NA
Pf3D7_01_v3	473500	T	-239			0	1	0	2	0	1	0.741745	0.741745	1.41843	1.24463	NA	NA	NA	NA	NA	NA	NA	NA	NA	NA
Pf3D7_01_v3	473501	A	-238			0	0	0	0	4	1	1	1	0.49495	0.61603	NA	NA	NA	NA	NA	NA	NA	NA	NA	NA
Pf3D7_01_v3	473502	A	-237			1	0	0	0	0	0	1.2	1	1	1	NA	NA	NA	NA	NA	NA	NA	NA	NA	NA
Pf3D7_01_v3	473503	A	-236			0	0	0	0	0	0	1	1	1	1	NA	NA	NA	NA	NA	NA	NA	NA	NA	NA
Pf3D7_01_v3	473504	T	-235			2	0	0	0	0	2	1.4	1	1	1.48926	NA	NA	NA	NA	NA	NA	NA	NA	NA	NA
Pf3D7_01_v3	473505	A	-234			0	0	1	0	0	0	1	1.2037	1	1	NA	NA	NA	NA	NA	NA	NA	NA	NA	NA
Pf3D7_01_v3	473506	A	-233			0	0	0	3	0	3	1	1	1.62764	1.73389	NA	NA	NA	NA	NA	NA	NA	NA	NA	NA
Pf3D7_01_v3	473507	A	-232			0	0	1	0	4	1	1	1.2037	0.49495	0.61603	NA	NA	NA	NA	NA	NA	NA	NA	NA	NA
Pf3D7_01_v3	473508	A	-231			1	0	0	0	0	0	1.2	1	1	1	NA	NA	NA	NA	NA	NA	NA	NA	NA	NA
Pf3D7_01_v3	473510	A	-229			0	0	0	1	1	0	1	1	0.963438	0.796748	NA	NA	NA	NA	NA	NA	NA	NA	NA	NA
Pf3D7_01_v3	473511	T	-228			0	0	0	1	0	0	1	1	1.20921	1	NA	NA	NA	NA	NA	NA	NA	NA	NA	NA
Pf3D7_01_v3	473512	A	-227			0	1	0	0	0	0	0.741745	0.741745	1	1	NA	NA	NA	NA	NA	NA	NA	NA	NA	NA
Pf3D7_01_v3	473513	C	-226			0	0	0	1	0	0	1	1	1.20921	1	NA	NA	NA	NA	NA	NA	NA	NA	NA	NA
Pf3D7_01_v3	473514	A	-225			1	0	0	0	0	0	1.2	1	1	1	NA	NA	NA	NA	NA	NA	NA	NA	NA	NA
Pf3D7_01_v3	473518	T	-221			0	1	0	0	1	0	0.741745	0.741745	0.796748	0.796748	NA	NA	NA	NA	NA	NA	NA	NA	NA	NA
Pf3D7_01_v3	473519	G	-220			0	0	0	0	0	1	1	1	1	1.24463	NA	NA	NA	NA	NA	NA	NA	NA	NA	NA
Pf3D7_01_v3	473522	T	-217			0	0	1	0	0	0	1	1.2037	1	1	NA	NA	NA	NA	NA	NA	NA	NA	NA	NA
Pf3D7_01_v3	473525	T	-214			0	0	0	1	0	0	1	1	1.20921	1	NA	NA	NA	NA	NA	NA	NA	NA	NA	NA
Pf3D7_01_v3	473530	T	-209			0	0	0	1	0	0	1	1	1.20921	1	NA	NA	NA	NA	NA	NA	NA	NA	NA	NA
Pf3D7_01_v3	473531	T	-208			0	0	0	1	0	0	1	1	1.20921	1	NA	NA	NA	NA	NA	NA	NA	NA	NA	NA
Pf3D7_01_v3	473539	A	-200			0	0	0	0	0	0	1	1	1	1	NA	NA	NA	NA	NA	NA	NA	NA	NA	NA
Pf3D7_01_v3	473541	A	-198			0	0	0	1	0	0	1	1	1.20921	1	NA	NA	NA	NA	NA	NA	NA	NA	NA	NA
Pf3D7_01_v3	473548	T	-191			0	1	0	0	0	0	0.741745	0.741745	1	1	NA	NA	NA	NA	NA	NA	NA	NA	NA	NA
Pf3D7_01_v3	473552	T	-187			0	0	0	0	0	0	1	1	1	1	NA	NA	NA	NA	NA	NA	NA	NA	NA	NA
Pf3D7_01_v3	473553	C	-186			0	0	0	0	0	0	1	1	1	1	NA	NA	NA	NA	NA	NA	NA	NA	NA	NA
Pf3D7_01_v3	473554	A	-185			0	0	0	0	1	0	1	1	0.796748	0.796748	NA	NA	NA	NA	NA	NA	NA	NA	NA	NA
Pf3D7_01_v3	473557	A	-182			0	0	0	0	0	0	1	1	1	1	NA	NA	NA	NA	NA	NA	NA	NA	NA	NA
Pf3D7_01_v3	473564	T	-175			0	0	0	0	0	0	1	1	1	1	NA	NA	NA	NA	NA	NA	NA	NA	NA	NA
Pf3D7_01_v3	473565	A	-174			0	0	0	0	0	0	1	1	1	1	NA	NA	NA	NA	NA	NA	NA	NA	NA	NA
Pf3D7_01_v3	473567	A	-172			0	0	0	0	1	0	1	1	0.796748	0.796748	NA	NA	NA	NA	NA	NA	NA	NA	NA	NA
Pf3D7_01_v3	473569	G	-170			0	0	0	0	0	0	1	1	1	1	NA	NA	NA	NA	NA	NA	NA	NA	NA	NA
Pf3D7_01_v3	473572	T	-167			0	0	0	0	0	0	1	1	1	1	NA	NA	NA	NA	NA	NA	NA	NA	NA	NA
Pf3D7_01_v3	473573	A	-166			0	0	0	0	0	1	1	1	1	1.24463	NA	NA	NA	NA	NA	NA	NA	NA	NA	NA
Pf3D7_01_v3	473576	T	-163			0	0	0	0	1	0	1	1	0.796748	0.796748	NA	NA	NA	NA	NA	NA	NA	NA	NA	NA
Pf3D7_01_v3	473577	A	-162			0	1	0	0	0	0	0.741745	0.741745	1	1	NA	NA	NA	NA	NA	NA	NA	NA	NA	NA
Pf3D7_01_v3	473578	T	-161			0	0	0	0	1	0	1	1	0.796748	0.796748	NA	NA	NA	NA	NA	NA	NA	NA	NA	NA
Pf3D7_01_v3	473582	T	-157			0	1	0	0	0	0	0.741745	0.741745	1	1	NA	NA	NA	NA	NA	NA	NA	NA	NA	NA
Pf3D7_01_v3	473584	T	-155			0	0	0	1	0	0	1	1	1.20921	1	NA	NA	NA	NA	NA	NA	NA	NA	NA	NA
Pf3D7_01_v3	473594	C	-145			0	1	0	1	0	0	0.741745	0.741745	1.20921	1	NA	NA	NA	NA	NA	NA	NA	NA	NA	NA
Pf3D7_01_v3	473595	A	-144			0	0	0	0	0	0	1	1	1	1	NA	NA	NA	NA	NA	NA	NA	NA	NA	NA
Pf3D7_01_v3	473600	A	-139			2	0	0	1	0	0	1.4	1	1.20921	1	NA	NA	NA	NA	NA	NA	NA	NA	NA	NA
Pf3D7_01_v3	473614	T	-125			1	0	0	0	0	1	1.2	1	1	1.24463	NA	NA	NA	NA	NA	NA	NA	NA	NA	NA
Pf3D7_01_v3	473615	T	-124			0	0	0	0	0	0	1	1	1	1	NA	NA	NA	NA	NA	NA	NA	NA	NA	NA
Pf3D7_01_v3	473618	T	-121			0	0	0	1	0	0	1	1	1.20921	1	NA	NA	NA	NA	NA	NA	NA	NA	NA	NA
Pf3D7_01_v3	473621	T	-118			0	0	0	0	0	0	1	1	1	1	NA	NA	NA	NA	NA	NA	NA	NA	NA	NA
Pf3D7_01_v3	473626	T	-113			0	0	0	0	1	0	1	1	0.796748	0.796748	NA	NA	NA	NA	NA	NA	NA	NA	NA	NA
Pf3D7_01_v3	473628	T	-111			0	0	0	0	0	0	1	1	1	1	NA	NA	NA	NA	NA	NA	NA	NA	NA	NA
Pf3D7_01_v3	473632	T	-107			0	0	0	0	0	0	1	1	1	1	NA	NA	NA	NA	NA	NA	NA	NA	NA	NA
Pf3D7_01_v3	473637	T	-102			0	0	0	2	0	0	1	1	1.41843	1	NA	NA	NA	NA	NA	NA	NA	NA	NA	NA
Pf3D7_01_v3	473638	T	-101			0	0	0	1	0	0	1	1	1.20921	1	NA	NA	NA	NA	NA	NA	NA	NA	NA	NA
Pf3D7_01_v3	473639	T	-100			0	0	0	1	0	0	1	1	1.20921	1	NA	NA	NA	NA	NA	NA	NA	NA	NA	NA
Pf3D7_01_v3	473640	A	-99			0	0	0	0	0	3	1	1	1	1.73389	NA	NA	NA	NA	NA	NA	NA	NA	NA	NA
Pf3D7_01_v3	473641	A	-98			0	0	0	0	0	2	1	1	1	1.48926	NA	NA	NA	NA	NA	NA	NA	NA	NA	NA
Pf3D7_01_v3	473645	T	-94			0	0	0	1	1	0	1	1	0.963438	0.796748	NA	NA	NA	NA	NA	NA	NA	NA	NA	NA
Pf3D7_01_v3	473647	T	-92			0	0	0	0	0	1	1	1	1	1.24463	NA	NA	NA	NA	NA	NA	NA	NA	NA	NA
Pf3D7_01_v3	473651	T	-88			0	0	0	0	0	0	1	1	1	1	NA	NA	NA	NA	NA	NA	NA	NA	NA	NA
Pf3D7_01_v3	473652	A	-87			0	0	0	0	0	0	1	1	1	1	NA	NA	NA	NA	NA	NA	NA	NA	NA	NA
Pf3D7_01_v3	473653	T	-86			0	0	0	0	0	0	1	1	1	1	NA	NA	NA	NA	NA	NA	NA	NA	NA	NA
Pf3D7_01_v3	473658	A	-81			0	3	0	0	0	0	0.489113	0.489113	1	1	NA	NA	NA	NA	NA	NA	NA	NA	NA	NA
Pf3D7_01_v3	473670	T	-69			0	0	0	0	1	0	1	1	0.796748	0.796748	NA	NA	NA	NA	NA	NA	NA	NA	NA	NA
Pf3D7_01_v3	473673	A	-66			0	0	0	0	0	1	1	1	1	1.24463	NA	NA	NA	NA	NA	NA	NA	NA	NA	NA
Pf3D7_01_v3	473674	T	-65			0	0	0	1	0	1	1	1	1.20921	1.24463	NA	NA	NA	NA	NA	NA	NA	NA	NA	NA
Pf3D7_01_v3	473675	A	-64			0	1	0	0	0	2	0.741745	0.741745	1	1.48926	NA	NA	NA	NA	NA	NA	NA	NA	NA	NA
Pf3D7_01_v3	473676	T	-63			0	0	0	1	0	3	1	1	1.20921	1.73389	NA	NA	NA	NA	NA	NA	NA	NA	NA	NA
Pf3D7_01_v3	473677	A	-62			0	0	0	0	0	1	1	1	1	1.24463	NA	NA	NA	NA	NA	NA	NA	NA	NA	NA
Pf3D7_01_v3	473679	A	-60			1	0	0	0	0	0	1.2	1	1	1	NA	NA	NA	NA	NA	NA	NA	NA	NA	NA
Pf3D7_01_v3	473681	G	-58			1	1	0	0	0	0	0.890094	0.741745	1	1	NA	NA	NA	NA	NA	NA	NA	NA	NA	NA
Pf3D7_01_v3	473682	T	-57			1	0	0	1	0	0	1.2	1	1.20921	1	NA	NA	NA	NA	NA	NA	NA	NA	NA	NA
Pf3D7_01_v3	473683	T	-56			4	0	0	1	0	2	1.8	1	1.20921	1.48926	NA	NA	NA	NA	NA	NA	NA	NA	NA	NA
Pf3D7_01_v3	473684	T	-55			0	1	0	3	1	2	0.741745	0.741745	1.29682	1.18657	NA	NA	NA	NA	NA	NA	NA	NA	NA	NA
Pf3D7_01_v3	473685	A	-54			0	0	0	2	0	0	1	1	1.41843	1	NA	NA	NA	NA	NA	NA	NA	NA	NA	NA
Pf3D7_01_v3	473686	T	-53			0	0	0	0	0	1	1	1	1	1.24463	NA	NA	NA	NA	NA	NA	NA	NA	NA	NA
Pf3D7_01_v3	473687	A	-52			0	1	0	1	0	0	0.741745	0.741745	1.20921	1	NA	NA	NA	NA	NA	NA	NA	NA	NA	NA
Pf3D7_01_v3	473688	T	-51			1	0	0	1	1	0	1.2	1	0.963438	0.796748	NA	NA	NA	NA	NA	NA	NA	NA	NA	NA
Pf3D7_01_v3	473689	T	-50			0	0	0	1	5	0	1	1	0.531403	0.439462	NA	NA	NA	NA	NA	NA	NA	NA	NA	NA
Pf3D7_01_v3	473690	A	-49			0	0	0	0	2	2	1	1	0.662162	0.986133	NA	NA	NA	NA	NA	NA	NA	NA	NA	NA
Pf3D7_01_v3	473691	T	-48			0	0	0	2	1	0	1	1	1.13013	0.796748	NA	NA	NA	NA	NA	NA	NA	NA	NA	NA
Pf3D7_01_v3	473692	A	-47			0	0	0	0	1	2	1	1	0.796748	1.18657	NA	NA	NA	NA	NA	NA	NA	NA	NA	NA
Pf3D7_01_v3	473693	T	-46			1	2	0	1	0	1	0.707403	0.589503	1.20921	1.24463	NA	NA	NA	NA	NA	NA	NA	NA	NA	NA
Pf3D7_01_v3	473694	A	-45			0	0	2	3	0	0	1	1.40739	1.62764	1	NA	NA	NA	NA	NA	NA	NA	NA	NA	NA
Pf3D7_01_v3	473696	T	-43			0	0	0	0	0	2	1	1	1	1.48926	NA	NA	NA	NA	NA	NA	NA	NA	NA	NA
Pf3D7_01_v3	473697	G	-42			0	0	0	2	0	0	1	1	1.41843	1	NA	NA	NA	NA	NA	NA	NA	NA	NA	NA
Pf3D7_01_v3	473699	G	-40			2	0	0	0	0	0	1.4	1	1	1	NA	NA	NA	NA	NA	NA	NA	NA	NA	NA
Pf3D7_01_v3	473700	A	-39			5	1	3	0	0	1	1.48349	1.19501	1	1.24463	NA	NA	NA	NA	NA	NA	NA	NA	NA	NA
Pf3D7_01_v3	473701	T	-38			0	0	1	0	1	4	1	1.2037	0.796748	1.57638	NA	NA	NA	NA	NA	NA	NA	NA	NA	NA
Pf3D7_01_v3	473702	A	-37			0	0	1	1	0	0	1	1.2037	1.20921	1	NA	NA	NA	NA	NA	NA	NA	NA	NA	NA
Pf3D7_01_v3	473703	G	-36			0	0	1	0	0	0	1	1.2037	1	1	NA	NA	NA	NA	NA	NA	NA	NA	NA	NA
Pf3D7_01_v3	473704	T	-35			0	0	0	1	0	1	1	1	1.20921	1.24463	NA	NA	NA	NA	NA	NA	NA	NA	NA	NA
Pf3D7_01_v3	473705	G	-34			0	0	0	4	0	1	1	1	1.83685	1.24463	NA	NA	NA	NA	NA	NA	NA	NA	NA	NA
Pf3D7_01_v3	473706	T	-33			0	0	0	0	0	2	1	1	1	1.48926	NA	NA	NA	NA	NA	NA	NA	NA	NA	NA
Pf3D7_01_v3	473707	G	-32			0	0	5	1	2	0	1	2.01848	0.800695	0.662162	NA	NA	NA	NA	NA	NA	NA	NA	NA	NA
Pf3D7_01_v3	473708	T	-31			0	0	1	0	0	0	1	1.2037	1	1	NA	NA	NA	NA	NA	NA	NA	NA	NA	NA
Pf3D7_01_v3	473709	T	-30			1	0	1	3	0	1	1.2	1.2037	1.62764	1.24463	NA	NA	NA	NA	NA	NA	NA	NA	NA	NA
Pf3D7_01_v3	473710	T	-29			0	0	2	1	0	3	1	1.40739	1.20921	1.73389	NA	NA	NA	NA	NA	NA	NA	NA	NA	NA
Pf3D7_01_v3	473711	A	-28			0	0	7	0	0	3	1	2.42587	1	1.73389	NA	NA	NA	NA	NA	NA	NA	NA	NA	NA
Pf3D7_01_v3	473712	A	-27			0	0	0	6	0	0	1	1	2.25528	1	NA	NA	NA	NA	NA	NA	NA	NA	NA	NA
Pf3D7_01_v3	473713	T	-26			1	0	0	0	0	0	1.2	1	1	1	NA	NA	NA	NA	NA	NA	NA	NA	NA	NA
Pf3D7_01_v3	473714	C	-25			0	0	0	3	1	0	1	1	1.29682	0.796748	NA	NA	NA	NA	NA	NA	NA	NA	NA	NA
Pf3D7_01_v3	473715	G	-24			0	0	0	0	1	0	1	1	0.796748	0.796748	NA	NA	NA	NA	NA	NA	NA	NA	NA	NA
Pf3D7_01_v3	473716	T	-23			0	0	0	1	0	1	1	1	1.20921	1.24463	NA	NA	NA	NA	NA	NA	NA	NA	NA	NA
Pf3D7_01_v3	473717	T	-22			0	0	7	1	0	0	1	2.42587	1.20921	1	NA	NA	NA	NA	NA	NA	NA	NA	NA	NA
Pf3D7_01_v3	473718	A	-21			1	0	1	0	4	2	1.2	1.2037	0.49495	0.737109	NA	NA	NA	NA	NA	NA	NA	NA	NA	NA
Pf3D7_01_v3	473719	T	-20			3	0	0	0	0	2	1.6	1	1	1.48926	NA	NA	NA	NA	NA	NA	NA	NA	NA	NA
Pf3D7_01_v3	473720	A	-19			0	0	0	4	1	4	1	1	1.46351	1.57638	NA	NA	NA	NA	NA	NA	NA	NA	NA	NA
Pf3D7_01_v3	473721	A	-18			0	0	2	0	1	1	1	1.40739	0.796748	0.991657	NA	NA	NA	NA	NA	NA	NA	NA	NA	NA
Pf3D7_01_v3	473722	T	-17			0	0	0	0	2	2	1	1	0.662162	0.986133	NA	NA	NA	NA	NA	NA	NA	NA	NA	NA
Pf3D7_01_v3	473723	A	-16			6	0	0	0	0	0	2.2	1	1	1	NA	NA	NA	NA	NA	NA	NA	NA	NA	NA
Pf3D7_01_v3	473724	T	-15			2	0	3	7	3	2	1.4	1.61109	1.39607	0.843628	NA	NA	NA	NA	NA	NA	NA	NA	NA	NA
Pf3D7_01_v3	473726	C	-13			0	0	0	0	1	3	1	1	0.796748	1.38148	NA	NA	NA	NA	NA	NA	NA	NA	NA	NA
Pf3D7_01_v3	473730	A	-9			0	0	0	2	1	0	1	1	1.13013	0.796748	NA	NA	NA	NA	NA	NA	NA	NA	NA	NA
Pf3D7_01_v3	473731	T	-8			0	0	0	0	4	1	1	1	0.49495	0.61603	NA	NA	NA	NA	NA	NA	NA	NA	NA	NA
Pf3D7_01_v3	473732	A	-7			0	1	0	0	2	0	0.741745	0.741745	0.662162	0.662162	NA	NA	NA	NA	NA	NA	NA	NA	NA	NA
Pf3D7_01_v3	473733	T	-6			0	0	0	0	0	1	1	1	1	1.24463	NA	NA	NA	NA	NA	NA	NA	NA	NA	NA
Pf3D7_01_v3	473734	A	-5			0	0	4	1	2	3	1	1.81478	0.800695	1.14812	NA	NA	NA	NA	NA	NA	NA	NA	NA	NA
Pf3D7_01_v3	473735	T	-4			1	0	0	1	3	2	1.2	1	0.684988	0.843628	NA	NA	NA	NA	NA	NA	NA	NA	NA	NA
Pf3D7_01_v3	473736	A	-3			0	0	1	3	0	2	1	1.2037	1.62764	1.48926	NA	NA	NA	NA	NA	NA	NA	NA	NA	NA
Pf3D7_01_v3	473737	G	-2			1	2	1	5	30	5	0.707403	0.709582	0.236456	0.256921	NA	NA	NA	NA	NA	NA	NA	NA	NA	NA
Pf3D7_01_v3	473738	T	-1			5	19	1	2	96	13	0.26263	0.158063	0.0556469	0.163995	NA	NA	NA	NA	NA	NA	NA	NA	NA	NA
Pf3D7_01_v3	473739	A		1		1	0	2	5	13	6	1.2	1.40739	0.47403	0.571733	rna_PF3D7_0112300-1	rna_PF3D7_0112300-1	Pf3D7_01_v3	473739	475887	PF3D7_0112300-1	18S+ribosomal+RNA	PF3D7_0112300-1	2149	PF3D7_0112300
Pf3D7_01_v3	473740	A		2		0	2	1	3	5	7	0.589503	0.709582	0.715286	1.192	rna_PF3D7_0112300-1	rna_PF3D7_0112300-1	Pf3D7_01_v3	473739	475887	PF3D7_0112300-1	18S+ribosomal+RNA	PF3D7_0112300-1	2149	PF3D7_0112300
Pf3D7_01_v3	473741	C		3		0	1	1	1	3	0	0.741745	0.892835	0.684988	0.566474	rna_PF3D7_0112300-1	rna_PF3D7_0112300-1	Pf3D7_01_v3	473739	475887	PF3D7_0112300-1	18S+ribosomal+RNA	PF3D7_0112300-1	2149	PF3D7_0112300
Pf3D7_01_v3	473742	C		4		0	0	1	5	3	2	1	1.2037	1.15904	0.843628	rna_PF3D7_0112300-1	rna_PF3D7_0112300-1	Pf3D7_01_v3	473739	475887	PF3D7_0112300-1	18S+ribosomal+RNA	PF3D7_0112300-1	2149	PF3D7_0112300
Pf3D7_01_v3	473743	T		5		0	2	1	1	0	0	0.589503	0.709582	1.20921	1	rna_PF3D7_0112300-1	rna_PF3D7_0112300-1	Pf3D7_01_v3	473739	475887	PF3D7_0112300-1	18S+ribosomal+RNA	PF3D7_0112300-1	2149	PF3D7_0112300
Pf3D7_01_v3	473745	G		7		1	0	0	0	3	3	1.2	1	0.566474	0.982205	rna_PF3D7_0112300-1	rna_PF3D7_0112300-1	Pf3D7_01_v3	473739	475887	PF3D7_0112300-1	18S+ribosomal+RNA	PF3D7_0112300-1	2149	PF3D7_0112300
Pf3D7_01_v3	473746	T		8		0	0	1	0	1	1	1	1.2037	0.796748	0.991657	rna_PF3D7_0112300-1	rna_PF3D7_0112300-1	Pf3D7_01_v3	473739	475887	PF3D7_0112300-1	18S+ribosomal+RNA	PF3D7_0112300-1	2149	PF3D7_0112300
Pf3D7_01_v3	473747	T		9		0	0	0	2	0	0	1	1	1.41843	1	rna_PF3D7_0112300-1	rna_PF3D7_0112300-1	Pf3D7_01_v3	473739	475887	PF3D7_0112300-1	18S+ribosomal+RNA	PF3D7_0112300-1	2149	PF3D7_0112300
Pf3D7_01_v3	473748	G		10		1	0	3	9	3	7	1.2	1.61109	1.6331	1.53651	rna_PF3D7_0112300-1	rna_PF3D7_0112300-1	Pf3D7_01_v3	473739	475887	PF3D7_0112300-1	18S+ribosomal+RNA	PF3D7_0112300-1	2149	PF3D7_0112300
Pf3D7_01_v3	473749	A		11		6	3	3	2	7	11	1.07605	0.788003	0.509179	1.32495	rna_PF3D7_0112300-1	rna_PF3D7_0112300-1	Pf3D7_01_v3	473739	475887	PF3D7_0112300-1	18S+ribosomal+RNA	PF3D7_0112300-1	2149	PF3D7_0112300
Pf3D7_01_v3	473750	T		12		1	0	0	0	1	2	1.2	1	0.796748	1.18657	rna_PF3D7_0112300-1	rna_PF3D7_0112300-1	Pf3D7_01_v3	473739	475887	PF3D7_0112300-1	18S+ribosomal+RNA	PF3D7_0112300-1	2149	PF3D7_0112300
Pf3D7_01_v3	473751	C		13		2	1	0	2	3	0	1.03844	0.741745	0.803502	0.566474	rna_PF3D7_0112300-1	rna_PF3D7_0112300-1	Pf3D7_01_v3	473739	475887	PF3D7_0112300-1	18S+ribosomal+RNA	PF3D7_0112300-1	2149	PF3D7_0112300
Pf3D7_01_v3	473752	T		14		1	0	1	1	1	2	1.2	1.2037	0.963438	1.18657	rna_PF3D7_0112300-1	rna_PF3D7_0112300-1	Pf3D7_01_v3	473739	475887	PF3D7_0112300-1	18S+ribosomal+RNA	PF3D7_0112300-1	2149	PF3D7_0112300
Pf3D7_01_v3	473753	T		15		0	0	1	2	0	2	1	1.2037	1.41843	1.48926	rna_PF3D7_0112300-1	rna_PF3D7_0112300-1	Pf3D7_01_v3	473739	475887	PF3D7_0112300-1	18S+ribosomal+RNA	PF3D7_0112300-1	2149	PF3D7_0112300
Pf3D7_01_v3	473754	G		16		0	0	3	0	0	2	1	1.61109	1	1.48926	rna_PF3D7_0112300-1	rna_PF3D7_0112300-1	Pf3D7_01_v3	473739	475887	PF3D7_0112300-1	18S+ribosomal+RNA	PF3D7_0112300-1	2149	PF3D7_0112300
Pf3D7_01_v3	473755	C		17		0	0	0	1	1	0	1	1	0.963438	0.796748	rna_PF3D7_0112300-1	rna_PF3D7_0112300-1	Pf3D7_01_v3	473739	475887	PF3D7_0112300-1	18S+ribosomal+RNA	PF3D7_0112300-1	2149	PF3D7_0112300
Pf3D7_01_v3	473756	C		18		0	2	0	0	3	0	0.589503	0.589503	0.566474	0.566474	rna_PF3D7_0112300-1	rna_PF3D7_0112300-1	Pf3D7_01_v3	473739	475887	PF3D7_0112300-1	18S+ribosomal+RNA	PF3D7_0112300-1	2149	PF3D7_0112300
Pf3D7_01_v3	473757	A		19		1	0	0	2	0	0	1.2	1	1.41843	1	rna_PF3D7_0112300-1	rna_PF3D7_0112300-1	Pf3D7_01_v3	473739	475887	PF3D7_0112300-1	18S+ribosomal+RNA	PF3D7_0112300-1	2149	PF3D7_0112300
Pf3D7_01_v3	473758	G		20		0	1	4	1	3	5	0.741745	1.3461	0.684988	1.25936	rna_PF3D7_0112300-1	rna_PF3D7_0112300-1	Pf3D7_01_v3	473739	475887	PF3D7_0112300-1	18S+ribosomal+RNA	PF3D7_0112300-1	2149	PF3D7_0112300
Pf3D7_01_v3	473759	T		21		0	0	1	1	2	1	1	1.2037	0.800695	0.824148	rna_PF3D7_0112300-1	rna_PF3D7_0112300-1	Pf3D7_01_v3	473739	475887	PF3D7_0112300-1	18S+ribosomal+RNA	PF3D7_0112300-1	2149	PF3D7_0112300
Pf3D7_01_v3	473760	A		22		3	0	0	2	1	1	1.6	1	1.13013	0.991657	rna_PF3D7_0112300-1	rna_PF3D7_0112300-1	Pf3D7_01_v3	473739	475887	PF3D7_0112300-1	18S+ribosomal+RNA	PF3D7_0112300-1	2149	PF3D7_0112300
Pf3D7_01_v3	473761	G		23		0	0	0	3	1	2	1	1	1.29682	1.18657	rna_PF3D7_0112300-1	rna_PF3D7_0112300-1	Pf3D7_01_v3	473739	475887	PF3D7_0112300-1	18S+ribosomal+RNA	PF3D7_0112300-1	2149	PF3D7_0112300
Pf3D7_01_v3	473762	T		24		0	1	0	2	0	6	0.741745	0.741745	1.41843	2.46778	rna_PF3D7_0112300-1	rna_PF3D7_0112300-1	Pf3D7_01_v3	473739	475887	PF3D7_0112300-1	18S+ribosomal+RNA	PF3D7_0112300-1	2149	PF3D7_0112300
Pf3D7_01_v3	473763	C		25		0	1	1	3	4	2	0.741745	0.892835	0.805599	0.737109	rna_PF3D7_0112300-1	rna_PF3D7_0112300-1	Pf3D7_01_v3	473739	475887	PF3D7_0112300-1	18S+ribosomal+RNA	PF3D7_0112300-1	2149	PF3D7_0112300
Pf3D7_01_v3	473764	A		26		0	1	0	3	2	2	0.741745	0.741745	1.07776	0.986133	rna_PF3D7_0112300-1	rna_PF3D7_0112300-1	Pf3D7_01_v3	473739	475887	PF3D7_0112300-1	18S+ribosomal+RNA	PF3D7_0112300-1	2149	PF3D7_0112300
Pf3D7_01_v3	473765	T		27		0	0	0	0	6	4	1	1	0.395162	0.781836	rna_PF3D7_0112300-1	rna_PF3D7_0112300-1	Pf3D7_01_v3	473739	475887	PF3D7_0112300-1	18S+ribosomal+RNA	PF3D7_0112300-1	2149	PF3D7_0112300
Pf3D7_01_v3	473766	A		28		0	0	0	2	0	0	1	1	1.41843	1	rna_PF3D7_0112300-1	rna_PF3D7_0112300-1	Pf3D7_01_v3	473739	475887	PF3D7_0112300-1	18S+ribosomal+RNA	PF3D7_0112300-1	2149	PF3D7_0112300
Pf3D7_01_v3	473767	T		29		0	0	0	2	2	1	1	1	0.939228	0.824148	rna_PF3D7_0112300-1	rna_PF3D7_0112300-1	Pf3D7_01_v3	473739	475887	PF3D7_0112300-1	18S+ribosomal+RNA	PF3D7_0112300-1	2149	PF3D7_0112300
Pf3D7_01_v3	473768	G		30		0	0	0	1	0	1	1	1	1.20921	1.24463	rna_PF3D7_0112300-1	rna_PF3D7_0112300-1	Pf3D7_01_v3	473739	475887	PF3D7_0112300-1	18S+ribosomal+RNA	PF3D7_0112300-1	2149	PF3D7_0112300
Pf3D7_01_v3	473769	C		31		0	1	0	0	6	2	0.741745	0.741745	0.395162	0.588499	rna_PF3D7_0112300-1	rna_PF3D7_0112300-1	Pf3D7_01_v3	473739	475887	PF3D7_0112300-1	18S+ribosomal+RNA	PF3D7_0112300-1	2149	PF3D7_0112300
Pf3D7_01_v3	473770	T		32		0	0	0	2	1	2	1	1	1.13013	1.18657	rna_PF3D7_0112300-1	rna_PF3D7_0112300-1	Pf3D7_01_v3	473739	475887	PF3D7_0112300-1	18S+ribosomal+RNA	PF3D7_0112300-1	2149	PF3D7_0112300
Pf3D7_01_v3	473771	T		33		0	0	0	2	0	0	1	1	1.41843	1	rna_PF3D7_0112300-1	rna_PF3D7_0112300-1	Pf3D7_01_v3	473739	475887	PF3D7_0112300-1	18S+ribosomal+RNA	PF3D7_0112300-1	2149	PF3D7_0112300
Pf3D7_01_v3	473772	G		34		0	0	0	2	0	4	1	1	1.41843	1.97852	rna_PF3D7_0112300-1	rna_PF3D7_0112300-1	Pf3D7_01_v3	473739	475887	PF3D7_0112300-1	18S+ribosomal+RNA	PF3D7_0112300-1	2149	PF3D7_0112300
Pf3D7_01_v3	473773	T		35		0	0	0	0	3	0	1	1	0.566474	0.566474	rna_PF3D7_0112300-1	rna_PF3D7_0112300-1	Pf3D7_01_v3	473739	475887	PF3D7_0112300-1	18S+ribosomal+RNA	PF3D7_0112300-1	2149	PF3D7_0112300
Pf3D7_01_v3	473774	C		36		1	1	2	5	3	5	0.890094	1.04392	1.15904	1.25936	rna_PF3D7_0112300-1	rna_PF3D7_0112300-1	Pf3D7_01_v3	473739	475887	PF3D7_0112300-1	18S+ribosomal+RNA	PF3D7_0112300-1	2149	PF3D7_0112300
Pf3D7_01_v3	473775	T		37		0	0	0	1	1	1	1	1	0.963438	0.991657	rna_PF3D7_0112300-1	rna_PF3D7_0112300-1	Pf3D7_01_v3	473739	475887	PF3D7_0112300-1	18S+ribosomal+RNA	PF3D7_0112300-1	2149	PF3D7_0112300
Pf3D7_01_v3	473776	C		38		0	1	3	6	1	4	0.741745	1.19501	1.79689	1.57638	rna_PF3D7_0112300-1	rna_PF3D7_0112300-1	Pf3D7_01_v3	473739	475887	PF3D7_0112300-1	18S+ribosomal+RNA	PF3D7_0112300-1	2149	PF3D7_0112300
Pf3D7_01_v3	473777	A		39		0	0	0	1	2	0	1	1	0.800695	0.662162	rna_PF3D7_0112300-1	rna_PF3D7_0112300-1	Pf3D7_01_v3	473739	475887	PF3D7_0112300-1	18S+ribosomal+RNA	PF3D7_0112300-1	2149	PF3D7_0112300
Pf3D7_01_v3	473778	C		40		0	0	0	2	1	0	1	1	1.13013	0.796748	rna_PF3D7_0112300-1	rna_PF3D7_0112300-1	Pf3D7_01_v3	473739	475887	PF3D7_0112300-1	18S+ribosomal+RNA	PF3D7_0112300-1	2149	PF3D7_0112300
Pf3D7_01_v3	473779	A		41		0	0	0	1	1	1	1	1	0.963438	0.991657	rna_PF3D7_0112300-1	rna_PF3D7_0112300-1	Pf3D7_01_v3	473739	475887	PF3D7_0112300-1	18S+ribosomal+RNA	PF3D7_0112300-1	2149	PF3D7_0112300
Pf3D7_01_v3	473780	G		42		0	0	0	8	1	2	1	1	2.13027	1.18657	rna_PF3D7_0112300-1	rna_PF3D7_0112300-1	Pf3D7_01_v3	473739	475887	PF3D7_0112300-1	18S+ribosomal+RNA	PF3D7_0112300-1	2149	PF3D7_0112300
Pf3D7_01_v3	473781	A		43		1	0	0	4	2	2	1.2	1	1.21629	0.986133	rna_PF3D7_0112300-1	rna_PF3D7_0112300-1	Pf3D7_01_v3	473739	475887	PF3D7_0112300-1	18S+ribosomal+RNA	PF3D7_0112300-1	2149	PF3D7_0112300
Pf3D7_01_v3	473782	T		44		1	0	1	0	5	1	1.2	1.2037	0.439462	0.546968	rna_PF3D7_0112300-1	rna_PF3D7_0112300-1	Pf3D7_01_v3	473739	475887	PF3D7_0112300-1	18S+ribosomal+RNA	PF3D7_0112300-1	2149	PF3D7_0112300
Pf3D7_01_v3	473783	T		45		0	0	2	2	2	5	1	1.40739	0.939228	1.47209	rna_PF3D7_0112300-1	rna_PF3D7_0112300-1	Pf3D7_01_v3	473739	475887	PF3D7_0112300-1	18S+ribosomal+RNA	PF3D7_0112300-1	2149	PF3D7_0112300
Pf3D7_01_v3	473784	A		46		3	0	0	1	0	3	1.6	1	1.20921	1.73389	rna_PF3D7_0112300-1	rna_PF3D7_0112300-1	Pf3D7_01_v3	473739	475887	PF3D7_0112300-1	18S+ribosomal+RNA	PF3D7_0112300-1	2149	PF3D7_0112300
Pf3D7_01_v3	473785	A		47		0	0	0	1	0	2	1	1	1.20921	1.48926	rna_PF3D7_0112300-1	rna_PF3D7_0112300-1	Pf3D7_01_v3	473739	475887	PF3D7_0112300-1	18S+ribosomal+RNA	PF3D7_0112300-1	2149	PF3D7_0112300
Pf3D7_01_v3	473786	G		48		0	0	0	0	0	2	1	1	1	1.48926	rna_PF3D7_0112300-1	rna_PF3D7_0112300-1	Pf3D7_01_v3	473739	475887	PF3D7_0112300-1	18S+ribosomal+RNA	PF3D7_0112300-1	2149	PF3D7_0112300
Pf3D7_01_v3	473787	C		49		0	1	0	3	0	0	0.741745	0.741745	1.62764	1	rna_PF3D7_0112300-1	rna_PF3D7_0112300-1	Pf3D7_01_v3	473739	475887	PF3D7_0112300-1	18S+ribosomal+RNA	PF3D7_0112300-1	2149	PF3D7_0112300
Pf3D7_01_v3	473788	C		50		0	0	1	1	0	3	1	1.2037	1.20921	1.73389	rna_PF3D7_0112300-1	rna_PF3D7_0112300-1	Pf3D7_01_v3	473739	475887	PF3D7_0112300-1	18S+ribosomal+RNA	PF3D7_0112300-1	2149	PF3D7_0112300
Pf3D7_01_v3	473789	A		51		0	0	1	1	2	6	1	1.2037	0.800695	1.63407	rna_PF3D7_0112300-1	rna_PF3D7_0112300-1	Pf3D7_01_v3	473739	475887	PF3D7_0112300-1	18S+ribosomal+RNA	PF3D7_0112300-1	2149	PF3D7_0112300
Pf3D7_01_v3	473790	T		52		0	0	0	2	0	0	1	1	1.41843	1	rna_PF3D7_0112300-1	rna_PF3D7_0112300-1	Pf3D7_01_v3	473739	475887	PF3D7_0112300-1	18S+ribosomal+RNA	PF3D7_0112300-1	2149	PF3D7_0112300
Pf3D7_01_v3	473791	G		53		1	0	0	1	0	0	1.2	1	1.20921	1	rna_PF3D7_0112300-1	rna_PF3D7_0112300-1	Pf3D7_01_v3	473739	475887	PF3D7_0112300-1	18S+ribosomal+RNA	PF3D7_0112300-1	2149	PF3D7_0112300
Pf3D7_01_v3	473792	C		54		0	3	0	1	6	2	0.489113	0.489113	0.477834	0.588499	rna_PF3D7_0112300-1	rna_PF3D7_0112300-1	Pf3D7_01_v3	473739	475887	PF3D7_0112300-1	18S+ribosomal+RNA	PF3D7_0112300-1	2149	PF3D7_0112300
Pf3D7_01_v3	473793	A		55		0	0	0	1	0	0	1	1	1.20921	1	rna_PF3D7_0112300-1	rna_PF3D7_0112300-1	Pf3D7_01_v3	473739	475887	PF3D7_0112300-1	18S+ribosomal+RNA	PF3D7_0112300-1	2149	PF3D7_0112300
Pf3D7_01_v3	473794	A		56		0	0	0	0	0	5	1	1	1	2.22315	rna_PF3D7_0112300-1	rna_PF3D7_0112300-1	Pf3D7_01_v3	473739	475887	PF3D7_0112300-1	18S+ribosomal+RNA	PF3D7_0112300-1	2149	PF3D7_0112300
Pf3D7_01_v3	473795	G		57		0	0	5	2	0	0	1	2.01848	1.41843	1	rna_PF3D7_0112300-1	rna_PF3D7_0112300-1	Pf3D7_01_v3	473739	475887	PF3D7_0112300-1	18S+ribosomal+RNA	PF3D7_0112300-1	2149	PF3D7_0112300
Pf3D7_01_v3	473796	T		58		0	0	0	1	0	0	1	1	1.20921	1	rna_PF3D7_0112300-1	rna_PF3D7_0112300-1	Pf3D7_01_v3	473739	475887	PF3D7_0112300-1	18S+ribosomal+RNA	PF3D7_0112300-1	2149	PF3D7_0112300
Pf3D7_01_v3	473797	G		59		0	0	0	1	0	1	1	1	1.20921	1.24463	rna_PF3D7_0112300-1	rna_PF3D7_0112300-1	Pf3D7_01_v3	473739	475887	PF3D7_0112300-1	18S+ribosomal+RNA	PF3D7_0112300-1	2149	PF3D7_0112300
Pf3D7_01_v3	473798	A		60		2	0	2	1	0	6	1.4	1.40739	1.20921	2.46778	rna_PF3D7_0112300-1	rna_PF3D7_0112300-1	Pf3D7_01_v3	473739	475887	PF3D7_0112300-1	18S+ribosomal+RNA	PF3D7_0112300-1	2149	PF3D7_0112300
Pf3D7_01_v3	473799	A		61		0	0	0	2	1	1	1	1	1.13013	0.991657	rna_PF3D7_0112300-1	rna_PF3D7_0112300-1	Pf3D7_01_v3	473739	475887	PF3D7_0112300-1	18S+ribosomal+RNA	PF3D7_0112300-1	2149	PF3D7_0112300
Pf3D7_01_v3	473800	A		62		0	0	0	1	0	3	1	1	1.20921	1.73389	rna_PF3D7_0112300-1	rna_PF3D7_0112300-1	Pf3D7_01_v3	473739	475887	PF3D7_0112300-1	18S+ribosomal+RNA	PF3D7_0112300-1	2149	PF3D7_0112300
Pf3D7_01_v3	473801	G		63		0	0	1	3	0	5	1	1.2037	1.62764	2.22315	rna_PF3D7_0112300-1	rna_PF3D7_0112300-1	Pf3D7_01_v3	473739	475887	PF3D7_0112300-1	18S+ribosomal+RNA	PF3D7_0112300-1	2149	PF3D7_0112300
Pf3D7_01_v3	473802	T		64		1	0	18	3	2	7	1.2	4.66651	1.07776	1.79606	rna_PF3D7_0112300-1	rna_PF3D7_0112300-1	Pf3D7_01_v3	473739	475887	PF3D7_0112300-1	18S+ribosomal+RNA	PF3D7_0112300-1	2149	PF3D7_0112300
Pf3D7_01_v3	473803	A		65		0	0	0	1	0	5	1	1	1.20921	2.22315	rna_PF3D7_0112300-1	rna_PF3D7_0112300-1	Pf3D7_01_v3	473739	475887	PF3D7_0112300-1	18S+ribosomal+RNA	PF3D7_0112300-1	2149	PF3D7_0112300
Pf3D7_01_v3	473804	C		66		0	0	0	7	2	4	1	1	1.63189	1.3101	rna_PF3D7_0112300-1	rna_PF3D7_0112300-1	Pf3D7_01_v3	473739	475887	PF3D7_0112300-1	18S+ribosomal+RNA	PF3D7_0112300-1	2149	PF3D7_0112300
Pf3D7_01_v3	473805	A		67		1	0	2	2	0	1	1.2	1.40739	1.41843	1.24463	rna_PF3D7_0112300-1	rna_PF3D7_0112300-1	Pf3D7_01_v3	473739	475887	PF3D7_0112300-1	18S+ribosomal+RNA	PF3D7_0112300-1	2149	PF3D7_0112300
Pf3D7_01_v3	473806	T		68		0	1	0	0	1	5	0.741745	0.741745	0.796748	1.77129	rna_PF3D7_0112300-1	rna_PF3D7_0112300-1	Pf3D7_01_v3	473739	475887	PF3D7_0112300-1	18S+ribosomal+RNA	PF3D7_0112300-1	2149	PF3D7_0112300
Pf3D7_01_v3	473807	A		69		0	0	0	6	0	3	1	1	2.25528	1.73389	rna_PF3D7_0112300-1	rna_PF3D7_0112300-1	Pf3D7_01_v3	473739	475887	PF3D7_0112300-1	18S+ribosomal+RNA	PF3D7_0112300-1	2149	PF3D7_0112300
Pf3D7_01_v3	473808	T		70		3	1	2	3	0	4	1.18679	1.04392	1.62764	1.97852	rna_PF3D7_0112300-1	rna_PF3D7_0112300-1	Pf3D7_01_v3	473739	475887	PF3D7_0112300-1	18S+ribosomal+RNA	PF3D7_0112300-1	2149	PF3D7_0112300
Pf3D7_01_v3	473809	G		71		0	0	0	4	1	6	1	1	1.46351	1.9662	rna_PF3D7_0112300-1	rna_PF3D7_0112300-1	Pf3D7_01_v3	473739	475887	PF3D7_0112300-1	18S+ribosomal+RNA	PF3D7_0112300-1	2149	PF3D7_0112300
Pf3D7_01_v3	473810	T		72		7	0	0	4	0	3	2.4	1	1.83685	1.73389	rna_PF3D7_0112300-1	rna_PF3D7_0112300-1	Pf3D7_01_v3	473739	475887	PF3D7_0112300-1	18S+ribosomal+RNA	PF3D7_0112300-1	2149	PF3D7_0112300
Pf3D7_01_v3	473811	A		73		5	0	1	1	2	1	2	1.2037	0.800695	0.824148	rna_PF3D7_0112300-1	rna_PF3D7_0112300-1	Pf3D7_01_v3	473739	475887	PF3D7_0112300-1	18S+ribosomal+RNA	PF3D7_0112300-1	2149	PF3D7_0112300
Pf3D7_01_v3	473812	A		74		0	0	3	0	0	1	1	1.61109	1	1.24463	rna_PF3D7_0112300-1	rna_PF3D7_0112300-1	Pf3D7_01_v3	473739	475887	PF3D7_0112300-1	18S+ribosomal+RNA	PF3D7_0112300-1	2149	PF3D7_0112300
Pf3D7_01_v3	473813	G		75		0	1	0	10	6	7	0.741745	0.741745	1.22189	1.07184	rna_PF3D7_0112300-1	rna_PF3D7_0112300-1	Pf3D7_01_v3	473739	475887	PF3D7_0112300-1	18S+ribosomal+RNA	PF3D7_0112300-1	2149	PF3D7_0112300
Pf3D7_01_v3	473814	T		76		0	0	0	1	4	0	1	1	0.5985	0.49495	rna_PF3D7_0112300-1	rna_PF3D7_0112300-1	Pf3D7_01_v3	473739	475887	PF3D7_0112300-1	18S+ribosomal+RNA	PF3D7_0112300-1	2149	PF3D7_0112300
Pf3D7_01_v3	473815	A		77		0	0	4	5	5	5	1	1.81478	0.899168	0.976992	rna_PF3D7_0112300-1	rna_PF3D7_0112300-1	Pf3D7_01_v3	473739	475887	PF3D7_0112300-1	18S+ribosomal+RNA	PF3D7_0112300-1	2149	PF3D7_0112300
Pf3D7_01_v3	473816	A		78		0	0	1	9	1	2	1	1.2037	2.29696	1.18657	rna_PF3D7_0112300-1	rna_PF3D7_0112300-1	Pf3D7_01_v3	473739	475887	PF3D7_0112300-1	18S+ribosomal+RNA	PF3D7_0112300-1	2149	PF3D7_0112300
Pf3D7_01_v3	473817	T		79		1	1	0	3	4	5	0.890094	0.741745	0.805599	1.10035	rna_PF3D7_0112300-1	rna_PF3D7_0112300-1	Pf3D7_01_v3	473739	475887	PF3D7_0112300-1	18S+ribosomal+RNA	PF3D7_0112300-1	2149	PF3D7_0112300
Pf3D7_01_v3	473818	A		80		5	0	0	2	3	1	2	1	0.803502	0.705051	rna_PF3D7_0112300-1	rna_PF3D7_0112300-1	Pf3D7_01_v3	473739	475887	PF3D7_0112300-1	18S+ribosomal+RNA	PF3D7_0112300-1	2149	PF3D7_0112300
Pf3D7_01_v3	473819	T		81		0	0	2	4	6	17	1	1.40739	0.725853	2.03853	rna_PF3D7_0112300-1	rna_PF3D7_0112300-1	Pf3D7_01_v3	473739	475887	PF3D7_0112300-1	18S+ribosomal+RNA	PF3D7_0112300-1	2149	PF3D7_0112300
Pf3D7_01_v3	473820	A		82		0	1	0	11	5	8	0.741745	0.741745	1.45082	1.29951	rna_PF3D7_0112300-1	rna_PF3D7_0112300-1	Pf3D7_01_v3	473739	475887	PF3D7_0112300-1	18S+ribosomal+RNA	PF3D7_0112300-1	2149	PF3D7_0112300
Pf3D7_01_v3	473821	T		83		10	2	3	9	11	10	1.76851	0.949739	0.757443	0.905464	rna_PF3D7_0112300-1	rna_PF3D7_0112300-1	Pf3D7_01_v3	473739	475887	PF3D7_0112300-1	18S+ribosomal+RNA	PF3D7_0112300-1	2149	PF3D7_0112300
Pf3D7_01_v3	473822	T		84		46	10	33	47	20	21	2.27591	1.72298	1.77531	1.00577	rna_PF3D7_0112300-1	rna_PF3D7_0112300-1	Pf3D7_01_v3	473739	475887	PF3D7_0112300-1	18S+ribosomal+RNA	PF3D7_0112300-1	2149	PF3D7_0112300
Pf3D7_01_v3	473823	G		85		50	3	34	59	7	37	5.38024	3.87653	4.79	3.60817	rna_PF3D7_0112300-1	rna_PF3D7_0112300-1	Pf3D7_01_v3	473739	475887	PF3D7_0112300-1	18S+ribosomal+RNA	PF3D7_0112300-1	2149	PF3D7_0112300
Pf3D7_01_v3	473824	A		86		36	8	23	66	20	33	2.16623	1.50183	2.42674	1.48685	rna_PF3D7_0112300-1	rna_PF3D7_0112300-1	Pf3D7_01_v3	473739	475887	PF3D7_0112300-1	18S+ribosomal+RNA	PF3D7_0112300-1	2149	PF3D7_0112300
Pf3D7_01_v3	473825	A		87		27	4	15	61	18	18	2.67481	1.69492	2.46109	0.966293	rna_PF3D7_0112300-1	rna_PF3D7_0112300-1	Pf3D7_01_v3	473739	475887	PF3D7_0112300-1	18S+ribosomal+RNA	PF3D7_0112300-1	2149	PF3D7_0112300
Pf3D7_01_v3	473826	A		88		9	0	3	11	5	2	2.8	1.61109	1.45082	0.654474	rna_PF3D7_0112300-1	rna_PF3D7_0112300-1	Pf3D7_01_v3	473739	475887	PF3D7_0112300-1	18S+ribosomal+RNA	PF3D7_0112300-1	2149	PF3D7_0112300
Pf3D7_01_v3	473827	C		89		6	1	0	10	4	1	1.63184	0.741745	1.53045	0.61603	rna_PF3D7_0112300-1	rna_PF3D7_0112300-1	Pf3D7_01_v3	473739	475887	PF3D7_0112300-1	18S+ribosomal+RNA	PF3D7_0112300-1	2149	PF3D7_0112300
Pf3D7_01_v3	473828	T		90		0	0	0	4	1	0	1	1	1.46351	0.796748	rna_PF3D7_0112300-1	rna_PF3D7_0112300-1	Pf3D7_01_v3	473739	475887	PF3D7_0112300-1	18S+ribosomal+RNA	PF3D7_0112300-1	2149	PF3D7_0112300
Pf3D7_01_v3	473829	G		91		0	0	0	0	0	5	1	1	1	2.22315	rna_PF3D7_0112300-1	rna_PF3D7_0112300-1	Pf3D7_01_v3	473739	475887	PF3D7_0112300-1	18S+ribosomal+RNA	PF3D7_0112300-1	2149	PF3D7_0112300
Pf3D7_01_v3	473830	C		92		0	0	0	1	0	0	1	1	1.20921	1	rna_PF3D7_0112300-1	rna_PF3D7_0112300-1	Pf3D7_01_v3	473739	475887	PF3D7_0112300-1	18S+ribosomal+RNA	PF3D7_0112300-1	2149	PF3D7_0112300
Pf3D7_01_v3	473831	G		93		0	0	1	5	2	2	1	1.2037	1.35483	0.986133	rna_PF3D7_0112300-1	rna_PF3D7_0112300-1	Pf3D7_01_v3	473739	475887	PF3D7_0112300-1	18S+ribosomal+RNA	PF3D7_0112300-1	2149	PF3D7_0112300
Pf3D7_01_v3	473832	A		94		0	1	0	15	7	7	0.741745	0.741745	1.48551	0.973688	rna_PF3D7_0112300-1	rna_PF3D7_0112300-1	Pf3D7_01_v3	473739	475887	PF3D7_0112300-1	18S+ribosomal+RNA	PF3D7_0112300-1	2149	PF3D7_0112300
Pf3D7_01_v3	473833	A		95		0	0	0	2	1	1	1	1	1.13013	0.991657	rna_PF3D7_0112300-1	rna_PF3D7_0112300-1	Pf3D7_01_v3	473739	475887	PF3D7_0112300-1	18S+ribosomal+RNA	PF3D7_0112300-1	2149	PF3D7_0112300
Pf3D7_01_v3	473834	C		96		0	0	0	4	0	0	1	1	1.83685	1	rna_PF3D7_0112300-1	rna_PF3D7_0112300-1	Pf3D7_01_v3	473739	475887	PF3D7_0112300-1	18S+ribosomal+RNA	PF3D7_0112300-1	2149	PF3D7_0112300
Pf3D7_01_v3	473835	G		97		0	2	0	1	0	0	0.589503	0.589503	1.20921	1	rna_PF3D7_0112300-1	rna_PF3D7_0112300-1	Pf3D7_01_v3	473739	475887	PF3D7_0112300-1	18S+ribosomal+RNA	PF3D7_0112300-1	2149	PF3D7_0112300
Pf3D7_01_v3	473836	G		98		0	0	0	2	0	2	1	1	1.41843	1.48926	rna_PF3D7_0112300-1	rna_PF3D7_0112300-1	Pf3D7_01_v3	473739	475887	PF3D7_0112300-1	18S+ribosomal+RNA	PF3D7_0112300-1	2149	PF3D7_0112300
Pf3D7_01_v3	473837	C		99		0	1	0	6	5	5	0.741745	0.741745	0.991109	0.976992	rna_PF3D7_0112300-1	rna_PF3D7_0112300-1	Pf3D7_01_v3	473739	475887	PF3D7_0112300-1	18S+ribosomal+RNA	PF3D7_0112300-1	2149	PF3D7_0112300
Pf3D7_01_v3	473838	T		100		0	0	0	0	2	4	1	1	0.662162	1.3101	rna_PF3D7_0112300-1	rna_PF3D7_0112300-1	Pf3D7_01_v3	473739	475887	PF3D7_0112300-1	18S+ribosomal+RNA	PF3D7_0112300-1	2149	PF3D7_0112300
Pf3D7_01_v3	473839	C		101		0	0	1	8	16	18	1	1.2037	0.526151	1.06331	rna_PF3D7_0112300-1	rna_PF3D7_0112300-1	Pf3D7_01_v3	473739	475887	PF3D7_0112300-1	18S+ribosomal+RNA	PF3D7_0112300-1	2149	PF3D7_0112300
Pf3D7_01_v3	473840	A		102		0	0	0	6	8	8	1	1	0.741669	0.972452	rna_PF3D7_0112300-1	rna_PF3D7_0112300-1	Pf3D7_01_v3	473739	475887	PF3D7_0112300-1	18S+ribosomal+RNA	PF3D7_0112300-1	2149	PF3D7_0112300
Pf3D7_01_v3	473841	T		103		0	0	0	10	8	19	1	1	1.01688	1.85739	rna_PF3D7_0112300-1	rna_PF3D7_0112300-1	Pf3D7_01_v3	473739	475887	PF3D7_0112300-1	18S+ribosomal+RNA	PF3D7_0112300-1	2149	PF3D7_0112300
Pf3D7_01_v3	473842	T		104		0	0	0	7	9	2	1	1	0.747741	0.45185	rna_PF3D7_0112300-1	rna_PF3D7_0112300-1	Pf3D7_01_v3	473739	475887	PF3D7_0112300-1	18S+ribosomal+RNA	PF3D7_0112300-1	2149	PF3D7_0112300
Pf3D7_01_v3	473843	A		105		1	0	0	14	3	14	1.2	1	2.22567	2.50655	rna_PF3D7_0112300-1	rna_PF3D7_0112300-1	Pf3D7_01_v3	473739	475887	PF3D7_0112300-1	18S+ribosomal+RNA	PF3D7_0112300-1	2149	PF3D7_0112300
Pf3D7_01_v3	473844	A		106		0	1	1	6	6	22	0.741745	0.892835	0.891199	2.52187	rna_PF3D7_0112300-1	rna_PF3D7_0112300-1	Pf3D7_01_v3	473739	475887	PF3D7_0112300-1	18S+ribosomal+RNA	PF3D7_0112300-1	2149	PF3D7_0112300
Pf3D7_01_v3	473845	A		107		0	0	3	14	7	11	1	1.61109	1.4104	1.32495	rna_PF3D7_0112300-1	rna_PF3D7_0112300-1	Pf3D7_01_v3	473739	475887	PF3D7_0112300-1	18S+ribosomal+RNA	PF3D7_0112300-1	2149	PF3D7_0112300
Pf3D7_01_v3	473846	A		108		0	0	1	4	1	2	1	1.2037	1.46351	1.18657	rna_PF3D7_0112300-1	rna_PF3D7_0112300-1	Pf3D7_01_v3	473739	475887	PF3D7_0112300-1	18S+ribosomal+RNA	PF3D7_0112300-1	2149	PF3D7_0112300
Pf3D7_01_v3	473847	C		109		2	1	0	3	5	4	1.03844	0.741745	0.715286	0.869486	rna_PF3D7_0112300-1	rna_PF3D7_0112300-1	Pf3D7_01_v3	473739	475887	PF3D7_0112300-1	18S+ribosomal+RNA	PF3D7_0112300-1	2149	PF3D7_0112300
Pf3D7_01_v3	473848	A		110		0	0	0	2	3	6	1	1	0.803502	1.39794	rna_PF3D7_0112300-1	rna_PF3D7_0112300-1	Pf3D7_01_v3	473739	475887	PF3D7_0112300-1	18S+ribosomal+RNA	PF3D7_0112300-1	2149	PF3D7_0112300
Pf3D7_01_v3	473849	G		111		0	0	5	3	3	6	1	2.01848	0.922016	1.39794	rna_PF3D7_0112300-1	rna_PF3D7_0112300-1	Pf3D7_01_v3	473739	475887	PF3D7_0112300-1	18S+ribosomal+RNA	PF3D7_0112300-1	2149	PF3D7_0112300
Pf3D7_01_v3	473850	T		112		0	0	1	2	3	5	1	1.2037	0.803502	1.25936	rna_PF3D7_0112300-1	rna_PF3D7_0112300-1	Pf3D7_01_v3	473739	475887	PF3D7_0112300-1	18S+ribosomal+RNA	PF3D7_0112300-1	2149	PF3D7_0112300
Pf3D7_01_v3	473851	T		113		0	0	4	12	10	5	1	1.81478	0.988606	0.626061	rna_PF3D7_0112300-1	rna_PF3D7_0112300-1	Pf3D7_01_v3	473739	475887	PF3D7_0112300-1	18S+ribosomal+RNA	PF3D7_0112300-1	2149	PF3D7_0112300
Pf3D7_01_v3	473852	A		114		2	0	0	7	11	7	1.4	1	0.647507	0.712646	rna_PF3D7_0112300-1	rna_PF3D7_0112300-1	Pf3D7_01_v3	473739	475887	PF3D7_0112300-1	18S+ribosomal+RNA	PF3D7_0112300-1	2149	PF3D7_0112300
Pf3D7_01_v3	473853	T		115		0	0	1	15	0	8	1	1.2037	4.1382	2.95704	rna_PF3D7_0112300-1	rna_PF3D7_0112300-1	Pf3D7_01_v3	473739	475887	PF3D7_0112300-1	18S+ribosomal+RNA	PF3D7_0112300-1	2149	PF3D7_0112300
Pf3D7_01_v3	473854	A		116		3	0	0	8	5	10	1.6	1	1.17499	1.51452	rna_PF3D7_0112300-1	rna_PF3D7_0112300-1	Pf3D7_01_v3	473739	475887	PF3D7_0112300-1	18S+ribosomal+RNA	PF3D7_0112300-1	2149	PF3D7_0112300
Pf3D7_01_v3	473855	A		117		3	0	0	10	12	3	1.6	1	0.761379	0.426938	rna_PF3D7_0112300-1	rna_PF3D7_0112300-1	Pf3D7_01_v3	473739	475887	PF3D7_0112300-1	18S+ribosomal+RNA	PF3D7_0112300-1	2149	PF3D7_0112300
Pf3D7_01_v3	473856	T		118		0	0	0	5	0	2	1	1	2.04607	1.48926	rna_PF3D7_0112300-1	rna_PF3D7_0112300-1	Pf3D7_01_v3	473739	475887	PF3D7_0112300-1	18S+ribosomal+RNA	PF3D7_0112300-1	2149	PF3D7_0112300
Pf3D7_01_v3	473857	C		119		0	0	0	3	7	9	1	1	0.584281	1.14932	rna_PF3D7_0112300-1	rna_PF3D7_0112300-1	Pf3D7_01_v3	473739	475887	PF3D7_0112300-1	18S+ribosomal+RNA	PF3D7_0112300-1	2149	PF3D7_0112300
Pf3D7_01_v3	473858	T		120		0	1	0	12	6	12	0.741745	0.741745	1.38724	1.55518	rna_PF3D7_0112300-1	rna_PF3D7_0112300-1	Pf3D7_01_v3	473739	475887	PF3D7_0112300-1	18S+ribosomal+RNA	PF3D7_0112300-1	2149	PF3D7_0112300
Pf3D7_01_v3	473859	A		121		1	0	0	2	0	1	1.2	1	1.41843	1.24463	rna_PF3D7_0112300-1	rna_PF3D7_0112300-1	Pf3D7_01_v3	473739	475887	PF3D7_0112300-1	18S+ribosomal+RNA	PF3D7_0112300-1	2149	PF3D7_0112300
Pf3D7_01_v3	473860	C		122		0	1	2	9	5	19	0.741745	1.04392	1.26693	2.48207	rna_PF3D7_0112300-1	rna_PF3D7_0112300-1	Pf3D7_01_v3	473739	475887	PF3D7_0112300-1	18S+ribosomal+RNA	PF3D7_0112300-1	2149	PF3D7_0112300
Pf3D7_01_v3	473861	T		123		1	0	0	8	3	1	1.2	1	1.51458	0.705051	rna_PF3D7_0112300-1	rna_PF3D7_0112300-1	Pf3D7_01_v3	473739	475887	PF3D7_0112300-1	18S+ribosomal+RNA	PF3D7_0112300-1	2149	PF3D7_0112300
Pf3D7_01_v3	473862	T		124		0	0	2	4	2	2	1	1.40739	1.21629	0.986133	rna_PF3D7_0112300-1	rna_PF3D7_0112300-1	Pf3D7_01_v3	473739	475887	PF3D7_0112300-1	18S+ribosomal+RNA	PF3D7_0112300-1	2149	PF3D7_0112300
Pf3D7_01_v3	473863	G		125		1	0	1	18	5	20	1.2	1.2037	2.0944	2.58958	rna_PF3D7_0112300-1	rna_PF3D7_0112300-1	Pf3D7_01_v3	473739	475887	PF3D7_0112300-1	18S+ribosomal+RNA	PF3D7_0112300-1	2149	PF3D7_0112300
Pf3D7_01_v3	473864	A		126		0	0	0	4	2	3	1	1	1.21629	1.14812	rna_PF3D7_0112300-1	rna_PF3D7_0112300-1	Pf3D7_01_v3	473739	475887	PF3D7_0112300-1	18S+ribosomal+RNA	PF3D7_0112300-1	2149	PF3D7_0112300
Pf3D7_01_v3	473865	T		127		0	0	2	0	0	10	1	1.40739	1	3.44631	rna_PF3D7_0112300-1	rna_PF3D7_0112300-1	Pf3D7_01_v3	473739	475887	PF3D7_0112300-1	18S+ribosomal+RNA	PF3D7_0112300-1	2149	PF3D7_0112300
Pf3D7_01_v3	473866	G		128		0	0	0	8	3	9	1	1	1.51458	1.81367	rna_PF3D7_0112300-1	rna_PF3D7_0112300-1	Pf3D7_01_v3	473739	475887	PF3D7_0112300-1	18S+ribosomal+RNA	PF3D7_0112300-1	2149	PF3D7_0112300
Pf3D7_01_v3	473867	T		129		1	0	0	7	5	9	1.2	1	1.08305	1.40702	rna_PF3D7_0112300-1	rna_PF3D7_0112300-1	Pf3D7_01_v3	473739	475887	PF3D7_0112300-1	18S+ribosomal+RNA	PF3D7_0112300-1	2149	PF3D7_0112300
Pf3D7_01_v3	473868	T		130		1	0	0	8	1	8	1.2	1	2.13027	2.35602	rna_PF3D7_0112300-1	rna_PF3D7_0112300-1	Pf3D7_01_v3	473739	475887	PF3D7_0112300-1	18S+ribosomal+RNA	PF3D7_0112300-1	2149	PF3D7_0112300
Pf3D7_01_v3	473869	T		131		0	0	2	8	7	11	1	1.40739	0.959792	1.32495	rna_PF3D7_0112300-1	rna_PF3D7_0112300-1	Pf3D7_01_v3	473739	475887	PF3D7_0112300-1	18S+ribosomal+RNA	PF3D7_0112300-1	2149	PF3D7_0112300
Pf3D7_01_v3	473870	T		132		0	1	2	8	4	14	0.741745	1.04392	1.32335	2.19007	rna_PF3D7_0112300-1	rna_PF3D7_0112300-1	Pf3D7_01_v3	473739	475887	PF3D7_0112300-1	18S+ribosomal+RNA	PF3D7_0112300-1	2149	PF3D7_0112300
Pf3D7_01_v3	473871	T		133		0	0	0	6	5	17	1	1	0.991109	2.26706	rna_PF3D7_0112300-1	rna_PF3D7_0112300-1	Pf3D7_01_v3	473739	475887	PF3D7_0112300-1	18S+ribosomal+RNA	PF3D7_0112300-1	2149	PF3D7_0112300
Pf3D7_01_v3	473872	A		134		2	0	1	11	7	16	1.4	1.2037	1.1851	1.76403	rna_PF3D7_0112300-1	rna_PF3D7_0112300-1	Pf3D7_01_v3	473739	475887	PF3D7_0112300-1	18S+ribosomal+RNA	PF3D7_0112300-1	2149	PF3D7_0112300
Pf3D7_01_v3	473873	A		135		0	1	1	19	4	23	0.741745	0.892835	2.4624	3.27979	rna_PF3D7_0112300-1	rna_PF3D7_0112300-1	Pf3D7_01_v3	473739	475887	PF3D7_0112300-1	18S+ribosomal+RNA	PF3D7_0112300-1	2149	PF3D7_0112300
Pf3D7_01_v3	473874	T		136		0	1	0	10	14	9	0.741745	0.741745	0.676404	0.700367	rna_PF3D7_0112300-1	rna_PF3D7_0112300-1	Pf3D7_01_v3	473739	475887	PF3D7_0112300-1	18S+ribosomal+RNA	PF3D7_0112300-1	2149	PF3D7_0112300
Pf3D7_01_v3	473875	A		137		2	0	0	10	6	9	1.4	1	1.22189	1.26518	rna_PF3D7_0112300-1	rna_PF3D7_0112300-1	Pf3D7_01_v3	473739	475887	PF3D7_0112300-1	18S+ribosomal+RNA	PF3D7_0112300-1	2149	PF3D7_0112300
Pf3D7_01_v3	473876	T		138		0	3	2	19	4	7	0.489113	0.688373	2.4624	1.34251	rna_PF3D7_0112300-1	rna_PF3D7_0112300-1	Pf3D7_01_v3	473739	475887	PF3D7_0112300-1	18S+ribosomal+RNA	PF3D7_0112300-1	2149	PF3D7_0112300
Pf3D7_01_v3	473877	A		139		0	0	0	9	9	6	1	1	0.874694	0.74874	rna_PF3D7_0112300-1	rna_PF3D7_0112300-1	Pf3D7_01_v3	473739	475887	PF3D7_0112300-1	18S+ribosomal+RNA	PF3D7_0112300-1	2149	PF3D7_0112300
Pf3D7_01_v3	473878	A		140		0	0	0	2	3	0	1	1	0.803502	0.566474	rna_PF3D7_0112300-1	rna_PF3D7_0112300-1	Pf3D7_01_v3	473739	475887	PF3D7_0112300-1	18S+ribosomal+RNA	PF3D7_0112300-1	2149	PF3D7_0112300
Pf3D7_01_v3	473879	G		141		0	0	0	2	0	0	1	1	1.41843	1	rna_PF3D7_0112300-1	rna_PF3D7_0112300-1	Pf3D7_01_v3	473739	475887	PF3D7_0112300-1	18S+ribosomal+RNA	PF3D7_0112300-1	2149	PF3D7_0112300
Pf3D7_01_v3	473880	G		142		2	1	2	15	6	13	1.03844	1.04392	1.63526	1.65185	rna_PF3D7_0112300-1	rna_PF3D7_0112300-1	Pf3D7_01_v3	473739	475887	PF3D7_0112300-1	18S+ribosomal+RNA	PF3D7_0112300-1	2149	PF3D7_0112300
Pf3D7_01_v3	473881	A		143		2	0	0	10	3	2	1.4	1	1.75161	0.843628	rna_PF3D7_0112300-1	rna_PF3D7_0112300-1	Pf3D7_01_v3	473739	475887	PF3D7_0112300-1	18S+ribosomal+RNA	PF3D7_0112300-1	2149	PF3D7_0112300
Pf3D7_01_v3	473882	T		144		0	0	1	7	4	3	1	1.2037	1.2198	0.858189	rna_PF3D7_0112300-1	rna_PF3D7_0112300-1	Pf3D7_01_v3	473739	475887	PF3D7_0112300-1	18S+ribosomal+RNA	PF3D7_0112300-1	2149	PF3D7_0112300
Pf3D7_01_v3	473883	A		145		0	6	0	11	6	2	0.323726	0.323726	1.30456	0.588499	rna_PF3D7_0112300-1	rna_PF3D7_0112300-1	Pf3D7_01_v3	473739	475887	PF3D7_0112300-1	18S+ribosomal+RNA	PF3D7_0112300-1	2149	PF3D7_0112300
Pf3D7_01_v3	473884	A		146		0	0	0	2	0	1	1	1	1.41843	1.24463	rna_PF3D7_0112300-1	rna_PF3D7_0112300-1	Pf3D7_01_v3	473739	475887	PF3D7_0112300-1	18S+ribosomal+RNA	PF3D7_0112300-1	2149	PF3D7_0112300
Pf3D7_01_v3	473885	C		147		0	1	0	8	4	2	0.741745	0.741745	1.32335	0.737109	rna_PF3D7_0112300-1	rna_PF3D7_0112300-1	Pf3D7_01_v3	473739	475887	PF3D7_0112300-1	18S+ribosomal+RNA	PF3D7_0112300-1	2149	PF3D7_0112300
Pf3D7_01_v3	473886	T		148		1	1	0	10	8	4	0.890094	0.741745	1.01688	0.650655	rna_PF3D7_0112300-1	rna_PF3D7_0112300-1	Pf3D7_01_v3	473739	475887	PF3D7_0112300-1	18S+ribosomal+RNA	PF3D7_0112300-1	2149	PF3D7_0112300
Pf3D7_01_v3	473887	A		149		0	0	0	8	2	0	1	1	1.77043	0.662162	rna_PF3D7_0112300-1	rna_PF3D7_0112300-1	Pf3D7_01_v3	473739	475887	PF3D7_0112300-1	18S+ribosomal+RNA	PF3D7_0112300-1	2149	PF3D7_0112300
Pf3D7_01_v3	473888	C		150		0	0	0	6	1	0	1	1	1.79689	0.796748	rna_PF3D7_0112300-1	rna_PF3D7_0112300-1	Pf3D7_01_v3	473739	475887	PF3D7_0112300-1	18S+ribosomal+RNA	PF3D7_0112300-1	2149	PF3D7_0112300
Pf3D7_01_v3	473889	G		151		0	0	0	3	2	0	1	1	1.07776	0.662162	rna_PF3D7_0112300-1	rna_PF3D7_0112300-1	Pf3D7_01_v3	473739	475887	PF3D7_0112300-1	18S+ribosomal+RNA	PF3D7_0112300-1	2149	PF3D7_0112300
Pf3D7_01_v3	473890	G		152		0	0	0	3	4	2	1	1	0.805599	0.737109	rna_PF3D7_0112300-1	rna_PF3D7_0112300-1	Pf3D7_01_v3	473739	475887	PF3D7_0112300-1	18S+ribosomal+RNA	PF3D7_0112300-1	2149	PF3D7_0112300
Pf3D7_01_v3	473891	A		153		1	0	1	4	8	4	1.2	1.2037	0.604066	0.650655	rna_PF3D7_0112300-1	rna_PF3D7_0112300-1	Pf3D7_01_v3	473739	475887	PF3D7_0112300-1	18S+ribosomal+RNA	PF3D7_0112300-1	2149	PF3D7_0112300
Pf3D7_01_v3	473892	A		154		0	1	0	5	5	18	0.741745	0.741745	0.899168	2.37457	rna_PF3D7_0112300-1	rna_PF3D7_0112300-1	Pf3D7_01_v3	473739	475887	PF3D7_0112300-1	18S+ribosomal+RNA	PF3D7_0112300-1	2149	PF3D7_0112300
Pf3D7_01_v3	473893	A		155		2	1	1	18	5	50	1.03844	0.892835	2.0944	5.81476	rna_PF3D7_0112300-1	rna_PF3D7_0112300-1	Pf3D7_01_v3	473739	475887	PF3D7_0112300-1	18S+ribosomal+RNA	PF3D7_0112300-1	2149	PF3D7_0112300
Pf3D7_01_v3	473894	A		156		0	0	2	7	9	39	1	1.40739	0.747741	3.19808	rna_PF3D7_0112300-1	rna_PF3D7_0112300-1	Pf3D7_01_v3	473739	475887	PF3D7_0112300-1	18S+ribosomal+RNA	PF3D7_0112300-1	2149	PF3D7_0112300
Pf3D7_01_v3	473895	T		157		1	0	0	3	4	8	1.2	1	0.805599	1.46359	rna_PF3D7_0112300-1	rna_PF3D7_0112300-1	Pf3D7_01_v3	473739	475887	PF3D7_0112300-1	18S+ribosomal+RNA	PF3D7_0112300-1	2149	PF3D7_0112300
Pf3D7_01_v3	473896	C		158		0	0	0	6	4	4	1	1	1.11625	0.979269	rna_PF3D7_0112300-1	rna_PF3D7_0112300-1	Pf3D7_01_v3	473739	475887	PF3D7_0112300-1	18S+ribosomal+RNA	PF3D7_0112300-1	2149	PF3D7_0112300
Pf3D7_01_v3	473897	T		159		0	0	0	2	1	0	1	1	1.13013	0.796748	rna_PF3D7_0112300-1	rna_PF3D7_0112300-1	Pf3D7_01_v3	473739	475887	PF3D7_0112300-1	18S+ribosomal+RNA	PF3D7_0112300-1	2149	PF3D7_0112300
Pf3D7_01_v3	473898	G		160		0	0	1	5	2	3	1	1.2037	1.35483	1.14812	rna_PF3D7_0112300-1	rna_PF3D7_0112300-1	Pf3D7_01_v3	473739	475887	PF3D7_0112300-1	18S+ribosomal+RNA	PF3D7_0112300-1	2149	PF3D7_0112300
Pf3D7_01_v3	473899	T		161		1	1	0	3	3	3	0.890094	0.741745	0.922016	0.982205	rna_PF3D7_0112300-1	rna_PF3D7_0112300-1	Pf3D7_01_v3	473739	475887	PF3D7_0112300-1	18S+ribosomal+RNA	PF3D7_0112300-1	2149	PF3D7_0112300
Pf3D7_01_v3	473900	A		162		0	0	0	5	1	0	1	1	1.6302	0.796748	rna_PF3D7_0112300-1	rna_PF3D7_0112300-1	Pf3D7_01_v3	473739	475887	PF3D7_0112300-1	18S+ribosomal+RNA	PF3D7_0112300-1	2149	PF3D7_0112300
Pf3D7_01_v3	473901	G		163		0	0	0	0	3	0	1	1	0.566474	0.566474	rna_PF3D7_0112300-1	rna_PF3D7_0112300-1	Pf3D7_01_v3	473739	475887	PF3D7_0112300-1	18S+ribosomal+RNA	PF3D7_0112300-1	2149	PF3D7_0112300
Pf3D7_01_v3	473902	C		164		0	0	0	5	1	1	1	1	1.6302	0.991657	rna_PF3D7_0112300-1	rna_PF3D7_0112300-1	Pf3D7_01_v3	473739	475887	PF3D7_0112300-1	18S+ribosomal+RNA	PF3D7_0112300-1	2149	PF3D7_0112300
Pf3D7_01_v3	473903	T		165		1	0	1	2	6	0	1.2	1.2037	0.560507	0.395162	rna_PF3D7_0112300-1	rna_PF3D7_0112300-1	Pf3D7_01_v3	473739	475887	PF3D7_0112300-1	18S+ribosomal+RNA	PF3D7_0112300-1	2149	PF3D7_0112300
Pf3D7_01_v3	473904	A		166		0	0	1	10	1	4	1	1.2037	2.46365	1.57638	rna_PF3D7_0112300-1	rna_PF3D7_0112300-1	Pf3D7_01_v3	473739	475887	PF3D7_0112300-1	18S+ribosomal+RNA	PF3D7_0112300-1	2149	PF3D7_0112300
Pf3D7_01_v3	473905	A		167		0	0	1	9	1	2	1	1.2037	2.29696	1.18657	rna_PF3D7_0112300-1	rna_PF3D7_0112300-1	Pf3D7_01_v3	473739	475887	PF3D7_0112300-1	18S+ribosomal+RNA	PF3D7_0112300-1	2149	PF3D7_0112300
Pf3D7_01_v3	473906	T		168		0	0	1	7	3	10	1	1.2037	1.39607	1.95224	rna_PF3D7_0112300-1	rna_PF3D7_0112300-1	Pf3D7_01_v3	473739	475887	PF3D7_0112300-1	18S+ribosomal+RNA	PF3D7_0112300-1	2149	PF3D7_0112300
Pf3D7_01_v3	473907	A		169		0	0	0	1	1	1	1	1	0.963438	0.991657	rna_PF3D7_0112300-1	rna_PF3D7_0112300-1	Pf3D7_01_v3	473739	475887	PF3D7_0112300-1	18S+ribosomal+RNA	PF3D7_0112300-1	2149	PF3D7_0112300
Pf3D7_01_v3	473908	C		170		0	0	0	4	5	3	1	1	0.807227	0.76198	rna_PF3D7_0112300-1	rna_PF3D7_0112300-1	Pf3D7_01_v3	473739	475887	PF3D7_0112300-1	18S+ribosomal+RNA	PF3D7_0112300-1	2149	PF3D7_0112300
Pf3D7_01_v3	473909	T		171		0	0	0	3	6	2	1	1	0.64318	0.588499	rna_PF3D7_0112300-1	rna_PF3D7_0112300-1	Pf3D7_01_v3	473739	475887	PF3D7_0112300-1	18S+ribosomal+RNA	PF3D7_0112300-1	2149	PF3D7_0112300
Pf3D7_01_v3	473910	T		172		0	0	0	2	4	1	1	1	0.70205	0.61603	rna_PF3D7_0112300-1	rna_PF3D7_0112300-1	Pf3D7_01_v3	473739	475887	PF3D7_0112300-1	18S+ribosomal+RNA	PF3D7_0112300-1	2149	PF3D7_0112300
Pf3D7_01_v3	473911	G		173		2	0	0	4	1	3	1.4	1	1.46351	1.38148	rna_PF3D7_0112300-1	rna_PF3D7_0112300-1	Pf3D7_01_v3	473739	475887	PF3D7_0112300-1	18S+ribosomal+RNA	PF3D7_0112300-1	2149	PF3D7_0112300
Pf3D7_01_v3	473912	T		174		0	0	0	3	1	2	1	1	1.29682	1.18657	rna_PF3D7_0112300-1	rna_PF3D7_0112300-1	Pf3D7_01_v3	473739	475887	PF3D7_0112300-1	18S+ribosomal+RNA	PF3D7_0112300-1	2149	PF3D7_0112300
Pf3D7_01_v3	473913	G		175		0	0	0	0	0	1	1	1	1	1.24463	rna_PF3D7_0112300-1	rna_PF3D7_0112300-1	Pf3D7_01_v3	473739	475887	PF3D7_0112300-1	18S+ribosomal+RNA	PF3D7_0112300-1	2149	PF3D7_0112300
Pf3D7_01_v3	473914	A		176		0	1	3	3	2	11	0.741745	1.19501	1.07776	2.444	rna_PF3D7_0112300-1	rna_PF3D7_0112300-1	Pf3D7_01_v3	473739	475887	PF3D7_0112300-1	18S+ribosomal+RNA	PF3D7_0112300-1	2149	PF3D7_0112300
Pf3D7_01_v3	473915	A		177		1	0	0	4	1	3	1.2	1	1.46351	1.38148	rna_PF3D7_0112300-1	rna_PF3D7_0112300-1	Pf3D7_01_v3	473739	475887	PF3D7_0112300-1	18S+ribosomal+RNA	PF3D7_0112300-1	2149	PF3D7_0112300
Pf3D7_01_v3	473916	A		178		0	0	0	4	1	13	1	1	1.46351	3.33056	rna_PF3D7_0112300-1	rna_PF3D7_0112300-1	Pf3D7_01_v3	473739	475887	PF3D7_0112300-1	18S+ribosomal+RNA	PF3D7_0112300-1	2149	PF3D7_0112300
Pf3D7_01_v3	473917	A		179		0	1	0	1	0	3	0.741745	0.741745	1.20921	1.73389	rna_PF3D7_0112300-1	rna_PF3D7_0112300-1	Pf3D7_01_v3	473739	475887	PF3D7_0112300-1	18S+ribosomal+RNA	PF3D7_0112300-1	2149	PF3D7_0112300
Pf3D7_01_v3	473918	T		180		0	0	0	3	2	2	1	1	1.07776	0.986133	rna_PF3D7_0112300-1	rna_PF3D7_0112300-1	Pf3D7_01_v3	473739	475887	PF3D7_0112300-1	18S+ribosomal+RNA	PF3D7_0112300-1	2149	PF3D7_0112300
Pf3D7_01_v3	473919	A		181		0	0	0	1	1	2	1	1	0.963438	1.18657	rna_PF3D7_0112300-1	rna_PF3D7_0112300-1	Pf3D7_01_v3	473739	475887	PF3D7_0112300-1	18S+ribosomal+RNA	PF3D7_0112300-1	2149	PF3D7_0112300
Pf3D7_01_v3	473920	C		182		0	0	0	1	0	2	1	1	1.20921	1.48926	rna_PF3D7_0112300-1	rna_PF3D7_0112300-1	Pf3D7_01_v3	473739	475887	PF3D7_0112300-1	18S+ribosomal+RNA	PF3D7_0112300-1	2149	PF3D7_0112300
Pf3D7_01_v3	473921	C		183		0	0	0	6	1	1	1	1	1.79689	0.991657	rna_PF3D7_0112300-1	rna_PF3D7_0112300-1	Pf3D7_01_v3	473739	475887	PF3D7_0112300-1	18S+ribosomal+RNA	PF3D7_0112300-1	2149	PF3D7_0112300
Pf3D7_01_v3	473922	T		184		0	0	0	2	3	1	1	1	0.803502	0.705051	rna_PF3D7_0112300-1	rna_PF3D7_0112300-1	Pf3D7_01_v3	473739	475887	PF3D7_0112300-1	18S+ribosomal+RNA	PF3D7_0112300-1	2149	PF3D7_0112300
Pf3D7_01_v3	473923	T		185		0	0	0	3	4	0	1	1	0.805599	0.49495	rna_PF3D7_0112300-1	rna_PF3D7_0112300-1	Pf3D7_01_v3	473739	475887	PF3D7_0112300-1	18S+ribosomal+RNA	PF3D7_0112300-1	2149	PF3D7_0112300
Pf3D7_01_v3	473924	T		186		0	0	0	2	2	1	1	1	0.939228	0.824148	rna_PF3D7_0112300-1	rna_PF3D7_0112300-1	Pf3D7_01_v3	473739	475887	PF3D7_0112300-1	18S+ribosomal+RNA	PF3D7_0112300-1	2149	PF3D7_0112300
Pf3D7_01_v3	473925	T		187		0	0	0	0	1	0	1	1	0.796748	0.796748	rna_PF3D7_0112300-1	rna_PF3D7_0112300-1	Pf3D7_01_v3	473739	475887	PF3D7_0112300-1	18S+ribosomal+RNA	PF3D7_0112300-1	2149	PF3D7_0112300
Pf3D7_01_v3	473926	G		188		0	0	0	1	1	0	1	1	0.963438	0.796748	rna_PF3D7_0112300-1	rna_PF3D7_0112300-1	Pf3D7_01_v3	473739	475887	PF3D7_0112300-1	18S+ribosomal+RNA	PF3D7_0112300-1	2149	PF3D7_0112300
Pf3D7_01_v3	473927	A		189		0	0	0	1	6	0	1	1	0.477834	0.395162	rna_PF3D7_0112300-1	rna_PF3D7_0112300-1	Pf3D7_01_v3	473739	475887	PF3D7_0112300-1	18S+ribosomal+RNA	PF3D7_0112300-1	2149	PF3D7_0112300
Pf3D7_01_v3	473928	T		190		0	0	0	1	3	0	1	1	0.684988	0.566474	rna_PF3D7_0112300-1	rna_PF3D7_0112300-1	Pf3D7_01_v3	473739	475887	PF3D7_0112300-1	18S+ribosomal+RNA	PF3D7_0112300-1	2149	PF3D7_0112300
Pf3D7_01_v3	473929	A		191		0	1	0	2	1	0	0.741745	0.741745	1.13013	0.796748	rna_PF3D7_0112300-1	rna_PF3D7_0112300-1	Pf3D7_01_v3	473739	475887	PF3D7_0112300-1	18S+ribosomal+RNA	PF3D7_0112300-1	2149	PF3D7_0112300
Pf3D7_01_v3	473930	T		192		0	0	0	3	0	0	1	1	1.62764	1	rna_PF3D7_0112300-1	rna_PF3D7_0112300-1	Pf3D7_01_v3	473739	475887	PF3D7_0112300-1	18S+ribosomal+RNA	PF3D7_0112300-1	2149	PF3D7_0112300
Pf3D7_01_v3	473931	A		193		0	1	0	1	2	0	0.741745	0.741745	0.800695	0.662162	rna_PF3D7_0112300-1	rna_PF3D7_0112300-1	Pf3D7_01_v3	473739	475887	PF3D7_0112300-1	18S+ribosomal+RNA	PF3D7_0112300-1	2149	PF3D7_0112300
Pf3D7_01_v3	473932	T		194		0	0	0	2	0	0	1	1	1.41843	1	rna_PF3D7_0112300-1	rna_PF3D7_0112300-1	Pf3D7_01_v3	473739	475887	PF3D7_0112300-1	18S+ribosomal+RNA	PF3D7_0112300-1	2149	PF3D7_0112300
Pf3D7_01_v3	473933	A		195		0	0	0	1	1	0	1	1	0.963438	0.796748	rna_PF3D7_0112300-1	rna_PF3D7_0112300-1	Pf3D7_01_v3	473739	475887	PF3D7_0112300-1	18S+ribosomal+RNA	PF3D7_0112300-1	2149	PF3D7_0112300
Pf3D7_01_v3	473934	C		196		1	1	0	2	1	1	0.890094	0.741745	1.13013	0.991657	rna_PF3D7_0112300-1	rna_PF3D7_0112300-1	Pf3D7_01_v3	473739	475887	PF3D7_0112300-1	18S+ribosomal+RNA	PF3D7_0112300-1	2149	PF3D7_0112300
Pf3D7_01_v3	473935	A		197		0	0	0	4	1	4	1	1	1.46351	1.57638	rna_PF3D7_0112300-1	rna_PF3D7_0112300-1	Pf3D7_01_v3	473739	475887	PF3D7_0112300-1	18S+ribosomal+RNA	PF3D7_0112300-1	2149	PF3D7_0112300
Pf3D7_01_v3	473936	T		198		2	0	0	1	5	5	1.4	1	0.531403	0.976992	rna_PF3D7_0112300-1	rna_PF3D7_0112300-1	Pf3D7_01_v3	473739	475887	PF3D7_0112300-1	18S+ribosomal+RNA	PF3D7_0112300-1	2149	PF3D7_0112300
Pf3D7_01_v3	473937	A		199		1	0	0	0	1	6	1.2	1	0.796748	1.9662	rna_PF3D7_0112300-1	rna_PF3D7_0112300-1	Pf3D7_01_v3	473739	475887	PF3D7_0112300-1	18S+ribosomal+RNA	PF3D7_0112300-1	2149	PF3D7_0112300
Pf3D7_01_v3	473938	T		200		0	0	0	0	0	4	1	1	1	1.97852	rna_PF3D7_0112300-1	rna_PF3D7_0112300-1	Pf3D7_01_v3	473739	475887	PF3D7_0112300-1	18S+ribosomal+RNA	PF3D7_0112300-1	2149	PF3D7_0112300
Pf3D7_01_v3	473940	T		202		0	0	1	1	3	0	1	1.2037	0.684988	0.566474	rna_PF3D7_0112300-1	rna_PF3D7_0112300-1	Pf3D7_01_v3	473739	475887	PF3D7_0112300-1	18S+ribosomal+RNA	PF3D7_0112300-1	2149	PF3D7_0112300
Pf3D7_01_v3	473941	A		203		0	0	0	3	2	0	1	1	1.07776	0.662162	rna_PF3D7_0112300-1	rna_PF3D7_0112300-1	Pf3D7_01_v3	473739	475887	PF3D7_0112300-1	18S+ribosomal+RNA	PF3D7_0112300-1	2149	PF3D7_0112300
Pf3D7_01_v3	473942	T		204		0	1	0	1	1	0	0.741745	0.741745	0.963438	0.796748	rna_PF3D7_0112300-1	rna_PF3D7_0112300-1	Pf3D7_01_v3	473739	475887	PF3D7_0112300-1	18S+ribosomal+RNA	PF3D7_0112300-1	2149	PF3D7_0112300
Pf3D7_01_v3	473943	G		205		0	1	0	1	0	0	0.741745	0.741745	1.20921	1	rna_PF3D7_0112300-1	rna_PF3D7_0112300-1	Pf3D7_01_v3	473739	475887	PF3D7_0112300-1	18S+ribosomal+RNA	PF3D7_0112300-1	2149	PF3D7_0112300
Pf3D7_01_v3	473944	T		206		0	0	0	3	3	0	1	1	0.922016	0.566474	rna_PF3D7_0112300-1	rna_PF3D7_0112300-1	Pf3D7_01_v3	473739	475887	PF3D7_0112300-1	18S+ribosomal+RNA	PF3D7_0112300-1	2149	PF3D7_0112300
Pf3D7_01_v3	473945	A		207		0	0	0	3	3	0	1	1	0.922016	0.566474	rna_PF3D7_0112300-1	rna_PF3D7_0112300-1	Pf3D7_01_v3	473739	475887	PF3D7_0112300-1	18S+ribosomal+RNA	PF3D7_0112300-1	2149	PF3D7_0112300
Pf3D7_01_v3	473946	T		208		0	0	0	1	0	0	1	1	1.20921	1	rna_PF3D7_0112300-1	rna_PF3D7_0112300-1	Pf3D7_01_v3	473739	475887	PF3D7_0112300-1	18S+ribosomal+RNA	PF3D7_0112300-1	2149	PF3D7_0112300
Pf3D7_01_v3	473947	C		209		0	0	0	0	3	1	1	1	0.566474	0.705051	rna_PF3D7_0112300-1	rna_PF3D7_0112300-1	Pf3D7_01_v3	473739	475887	PF3D7_0112300-1	18S+ribosomal+RNA	PF3D7_0112300-1	2149	PF3D7_0112300
Pf3D7_01_v3	473948	A		210		1	0	0	4	4	0	1.2	1	0.909149	0.49495	rna_PF3D7_0112300-1	rna_PF3D7_0112300-1	Pf3D7_01_v3	473739	475887	PF3D7_0112300-1	18S+ribosomal+RNA	PF3D7_0112300-1	2149	PF3D7_0112300
Pf3D7_01_v3	473949	T		211		0	0	1	2	4	4	1	1.2037	0.70205	0.979269	rna_PF3D7_0112300-1	rna_PF3D7_0112300-1	Pf3D7_01_v3	473739	475887	PF3D7_0112300-1	18S+ribosomal+RNA	PF3D7_0112300-1	2149	PF3D7_0112300
Pf3D7_01_v3	473950	T		212		0	0	0	0	1	0	1	1	0.796748	0.796748	rna_PF3D7_0112300-1	rna_PF3D7_0112300-1	Pf3D7_01_v3	473739	475887	PF3D7_0112300-1	18S+ribosomal+RNA	PF3D7_0112300-1	2149	PF3D7_0112300
Pf3D7_01_v3	473951	A		213		0	0	0	2	3	1	1	1	0.803502	0.705051	rna_PF3D7_0112300-1	rna_PF3D7_0112300-1	Pf3D7_01_v3	473739	475887	PF3D7_0112300-1	18S+ribosomal+RNA	PF3D7_0112300-1	2149	PF3D7_0112300
Pf3D7_01_v3	473952	A		214		0	0	0	0	1	1	1	1	0.796748	0.991657	rna_PF3D7_0112300-1	rna_PF3D7_0112300-1	Pf3D7_01_v3	473739	475887	PF3D7_0112300-1	18S+ribosomal+RNA	PF3D7_0112300-1	2149	PF3D7_0112300
Pf3D7_01_v3	473953	G		215		0	0	0	1	0	0	1	1	1.20921	1	rna_PF3D7_0112300-1	rna_PF3D7_0112300-1	Pf3D7_01_v3	473739	475887	PF3D7_0112300-1	18S+ribosomal+RNA	PF3D7_0112300-1	2149	PF3D7_0112300
Pf3D7_01_v3	473954	G		216		0	0	0	3	0	2	1	1	1.62764	1.48926	rna_PF3D7_0112300-1	rna_PF3D7_0112300-1	Pf3D7_01_v3	473739	475887	PF3D7_0112300-1	18S+ribosomal+RNA	PF3D7_0112300-1	2149	PF3D7_0112300
Pf3D7_01_v3	473955	T		217		0	0	0	10	2	0	1	1	2.04749	0.662162	rna_PF3D7_0112300-1	rna_PF3D7_0112300-1	Pf3D7_01_v3	473739	475887	PF3D7_0112300-1	18S+ribosomal+RNA	PF3D7_0112300-1	2149	PF3D7_0112300
Pf3D7_01_v3	473956	A		218		0	0	0	0	1	0	1	1	0.796748	0.796748	rna_PF3D7_0112300-1	rna_PF3D7_0112300-1	Pf3D7_01_v3	473739	475887	PF3D7_0112300-1	18S+ribosomal+RNA	PF3D7_0112300-1	2149	PF3D7_0112300
Pf3D7_01_v3	473957	T		219		1	0	3	3	1	0	1.2	1.61109	1.29682	0.796748	rna_PF3D7_0112300-1	rna_PF3D7_0112300-1	Pf3D7_01_v3	473739	475887	PF3D7_0112300-1	18S+ribosomal+RNA	PF3D7_0112300-1	2149	PF3D7_0112300
Pf3D7_01_v3	473958	G		220		0	0	0	2	1	6	1	1	1.13013	1.9662	rna_PF3D7_0112300-1	rna_PF3D7_0112300-1	Pf3D7_01_v3	473739	475887	PF3D7_0112300-1	18S+ribosomal+RNA	PF3D7_0112300-1	2149	PF3D7_0112300
Pf3D7_01_v3	473959	T		221		0	0	3	4	1	10	1	1.61109	1.46351	2.74584	rna_PF3D7_0112300-1	rna_PF3D7_0112300-1	Pf3D7_01_v3	473739	475887	PF3D7_0112300-1	18S+ribosomal+RNA	PF3D7_0112300-1	2149	PF3D7_0112300
Pf3D7_01_v3	473960	A		222		0	0	0	2	0	2	1	1	1.41843	1.48926	rna_PF3D7_0112300-1	rna_PF3D7_0112300-1	Pf3D7_01_v3	473739	475887	PF3D7_0112300-1	18S+ribosomal+RNA	PF3D7_0112300-1	2149	PF3D7_0112300
Pf3D7_01_v3	473961	T		223		0	0	0	3	2	3	1	1	1.07776	1.14812	rna_PF3D7_0112300-1	rna_PF3D7_0112300-1	Pf3D7_01_v3	473739	475887	PF3D7_0112300-1	18S+ribosomal+RNA	PF3D7_0112300-1	2149	PF3D7_0112300
Pf3D7_01_v3	473962	T		224		1	0	0	1	0	1	1.2	1	1.20921	1.24463	rna_PF3D7_0112300-1	rna_PF3D7_0112300-1	Pf3D7_01_v3	473739	475887	PF3D7_0112300-1	18S+ribosomal+RNA	PF3D7_0112300-1	2149	PF3D7_0112300
Pf3D7_01_v3	473963	T		225		0	0	0	4	0	4	1	1	1.83685	1.97852	rna_PF3D7_0112300-1	rna_PF3D7_0112300-1	Pf3D7_01_v3	473739	475887	PF3D7_0112300-1	18S+ribosomal+RNA	PF3D7_0112300-1	2149	PF3D7_0112300
Pf3D7_01_v3	473964	G		226		0	0	0	3	1	10	1	1	1.29682	2.74584	rna_PF3D7_0112300-1	rna_PF3D7_0112300-1	Pf3D7_01_v3	473739	475887	PF3D7_0112300-1	18S+ribosomal+RNA	PF3D7_0112300-1	2149	PF3D7_0112300
Pf3D7_01_v3	473965	T		227		0	0	0	4	2	3	1	1	1.21629	1.14812	rna_PF3D7_0112300-1	rna_PF3D7_0112300-1	Pf3D7_01_v3	473739	475887	PF3D7_0112300-1	18S+ribosomal+RNA	PF3D7_0112300-1	2149	PF3D7_0112300
Pf3D7_01_v3	473966	T		228		1	0	0	1	0	3	1.2	1	1.20921	1.73389	rna_PF3D7_0112300-1	rna_PF3D7_0112300-1	Pf3D7_01_v3	473739	475887	PF3D7_0112300-1	18S+ribosomal+RNA	PF3D7_0112300-1	2149	PF3D7_0112300
Pf3D7_01_v3	473967	A		229		0	0	0	2	0	1	1	1	1.41843	1.24463	rna_PF3D7_0112300-1	rna_PF3D7_0112300-1	Pf3D7_01_v3	473739	475887	PF3D7_0112300-1	18S+ribosomal+RNA	PF3D7_0112300-1	2149	PF3D7_0112300
Pf3D7_01_v3	473968	G		230		2	0	1	1	0	4	1.4	1.2037	1.20921	1.97852	rna_PF3D7_0112300-1	rna_PF3D7_0112300-1	Pf3D7_01_v3	473739	475887	PF3D7_0112300-1	18S+ribosomal+RNA	PF3D7_0112300-1	2149	PF3D7_0112300
Pf3D7_01_v3	473969	A		231		0	0	0	2	2	1	1	1	0.939228	0.824148	rna_PF3D7_0112300-1	rna_PF3D7_0112300-1	Pf3D7_01_v3	473739	475887	PF3D7_0112300-1	18S+ribosomal+RNA	PF3D7_0112300-1	2149	PF3D7_0112300
Pf3D7_01_v3	473970	T		232		0	0	0	0	2	3	1	1	0.662162	1.14812	rna_PF3D7_0112300-1	rna_PF3D7_0112300-1	Pf3D7_01_v3	473739	475887	PF3D7_0112300-1	18S+ribosomal+RNA	PF3D7_0112300-1	2149	PF3D7_0112300
Pf3D7_01_v3	473971	A		233		0	0	0	5	3	2	1	1	1.15904	0.843628	rna_PF3D7_0112300-1	rna_PF3D7_0112300-1	Pf3D7_01_v3	473739	475887	PF3D7_0112300-1	18S+ribosomal+RNA	PF3D7_0112300-1	2149	PF3D7_0112300
Pf3D7_01_v3	473972	T		234		0	2	2	5	7	7	0.589503	0.829661	0.734485	0.973688	rna_PF3D7_0112300-1	rna_PF3D7_0112300-1	Pf3D7_01_v3	473739	475887	PF3D7_0112300-1	18S+ribosomal+RNA	PF3D7_0112300-1	2149	PF3D7_0112300
Pf3D7_01_v3	473973	A		235		0	0	0	6	1	3	1	1	1.79689	1.38148	rna_PF3D7_0112300-1	rna_PF3D7_0112300-1	Pf3D7_01_v3	473739	475887	PF3D7_0112300-1	18S+ribosomal+RNA	PF3D7_0112300-1	2149	PF3D7_0112300
Pf3D7_01_v3	473974	A		236		0	0	0	2	0	3	1	1	1.41843	1.73389	rna_PF3D7_0112300-1	rna_PF3D7_0112300-1	Pf3D7_01_v3	473739	475887	PF3D7_0112300-1	18S+ribosomal+RNA	PF3D7_0112300-1	2149	PF3D7_0112300
Pf3D7_01_v3	473975	G		237		1	0	0	0	1	2	1.2	1	0.796748	1.18657	rna_PF3D7_0112300-1	rna_PF3D7_0112300-1	Pf3D7_01_v3	473739	475887	PF3D7_0112300-1	18S+ribosomal+RNA	PF3D7_0112300-1	2149	PF3D7_0112300
Pf3D7_01_v3	473976	A		238		1	0	1	12	3	9	1.2	1.2037	1.98864	1.81367	rna_PF3D7_0112300-1	rna_PF3D7_0112300-1	Pf3D7_01_v3	473739	475887	PF3D7_0112300-1	18S+ribosomal+RNA	PF3D7_0112300-1	2149	PF3D7_0112300
Pf3D7_01_v3	473977	A		239		1	0	1	5	1	7	1.2	1.2037	1.6302	2.16111	rna_PF3D7_0112300-1	rna_PF3D7_0112300-1	Pf3D7_01_v3	473739	475887	PF3D7_0112300-1	18S+ribosomal+RNA	PF3D7_0112300-1	2149	PF3D7_0112300
Pf3D7_01_v3	473978	T		240		0	0	1	7	0	5	1	1.2037	2.46449	2.22315	rna_PF3D7_0112300-1	rna_PF3D7_0112300-1	Pf3D7_01_v3	473739	475887	PF3D7_0112300-1	18S+ribosomal+RNA	PF3D7_0112300-1	2149	PF3D7_0112300
Pf3D7_01_v3	473979	A		241		0	0	2	13	3	11	1	1.40739	2.10715	2.09082	rna_PF3D7_0112300-1	rna_PF3D7_0112300-1	Pf3D7_01_v3	473739	475887	PF3D7_0112300-1	18S+ribosomal+RNA	PF3D7_0112300-1	2149	PF3D7_0112300
Pf3D7_01_v3	473980	A		242		0	0	1	9	0	8	1	1.2037	2.88292	2.95704	rna_PF3D7_0112300-1	rna_PF3D7_0112300-1	Pf3D7_01_v3	473739	475887	PF3D7_0112300-1	18S+ribosomal+RNA	PF3D7_0112300-1	2149	PF3D7_0112300
Pf3D7_01_v3	473981	A		243		0	0	3	10	3	7	1	1.61109	1.75161	1.53651	rna_PF3D7_0112300-1	rna_PF3D7_0112300-1	Pf3D7_01_v3	473739	475887	PF3D7_0112300-1	18S+ribosomal+RNA	PF3D7_0112300-1	2149	PF3D7_0112300
Pf3D7_01_v3	473982	A		244		0	0	0	3	3	14	1	1	0.922016	2.50655	rna_PF3D7_0112300-1	rna_PF3D7_0112300-1	Pf3D7_01_v3	473739	475887	PF3D7_0112300-1	18S+ribosomal+RNA	PF3D7_0112300-1	2149	PF3D7_0112300
Pf3D7_01_v3	473983	T		245		2	2	0	16	6	12	0.825304	0.589503	1.71793	1.55518	rna_PF3D7_0112300-1	rna_PF3D7_0112300-1	Pf3D7_01_v3	473739	475887	PF3D7_0112300-1	18S+ribosomal+RNA	PF3D7_0112300-1	2149	PF3D7_0112300
Pf3D7_01_v3	473984	A		246		1	0	4	7	2	9	1.2	1.81478	1.63189	2.12003	rna_PF3D7_0112300-1	rna_PF3D7_0112300-1	Pf3D7_01_v3	473739	475887	PF3D7_0112300-1	18S+ribosomal+RNA	PF3D7_0112300-1	2149	PF3D7_0112300
Pf3D7_01_v3	473985	A		247		1	1	1	11	10	17	0.890094	0.892835	0.929689	1.45274	rna_PF3D7_0112300-1	rna_PF3D7_0112300-1	Pf3D7_01_v3	473739	475887	PF3D7_0112300-1	18S+ribosomal+RNA	PF3D7_0112300-1	2149	PF3D7_0112300
Pf3D7_01_v3	473986	A		248		0	0	1	15	7	20	1	1.2037	1.48551	2.1153	rna_PF3D7_0112300-1	rna_PF3D7_0112300-1	Pf3D7_01_v3	473739	475887	PF3D7_0112300-1	18S+ribosomal+RNA	PF3D7_0112300-1	2149	PF3D7_0112300
Pf3D7_01_v3	473987	T		249		0	0	0	1	13	12	1	1	0.280149	0.911787	rna_PF3D7_0112300-1	rna_PF3D7_0112300-1	Pf3D7_01_v3	473739	475887	PF3D7_0112300-1	18S+ribosomal+RNA	PF3D7_0112300-1	2149	PF3D7_0112300
Pf3D7_01_v3	473988	A		250		0	0	0	3	12	15	1	1	0.400776	1.14977	rna_PF3D7_0112300-1	rna_PF3D7_0112300-1	Pf3D7_01_v3	473739	475887	PF3D7_0112300-1	18S+ribosomal+RNA	PF3D7_0112300-1	2149	PF3D7_0112300
Pf3D7_01_v3	473989	T		251		0	1	3	8	3	13	0.741745	1.19501	1.51458	2.36797	rna_PF3D7_0112300-1	rna_PF3D7_0112300-1	Pf3D7_01_v3	473739	475887	PF3D7_0112300-1	18S+ribosomal+RNA	PF3D7_0112300-1	2149	PF3D7_0112300
Pf3D7_01_v3	473990	A		252		1	0	4	9	11	20	1.2	1.81478	0.757443	1.54819	rna_PF3D7_0112300-1	rna_PF3D7_0112300-1	Pf3D7_01_v3	473739	475887	PF3D7_0112300-1	18S+ribosomal+RNA	PF3D7_0112300-1	2149	PF3D7_0112300
Pf3D7_01_v3	473991	A		253		0	1	2	6	5	14	0.741745	1.04392	0.991109	1.94454	rna_PF3D7_0112300-1	rna_PF3D7_0112300-1	Pf3D7_01_v3	473739	475887	PF3D7_0112300-1	18S+ribosomal+RNA	PF3D7_0112300-1	2149	PF3D7_0112300
Pf3D7_01_v3	473992	T		254		0	1	0	7	2	5	0.741745	0.741745	1.63189	1.47209	rna_PF3D7_0112300-1	rna_PF3D7_0112300-1	Pf3D7_01_v3	473739	475887	PF3D7_0112300-1	18S+ribosomal+RNA	PF3D7_0112300-1	2149	PF3D7_0112300
Pf3D7_01_v3	473993	T		255		1	0	1	6	1	11	1.2	1.2037	1.79689	2.94075	rna_PF3D7_0112300-1	rna_PF3D7_0112300-1	Pf3D7_01_v3	473739	475887	PF3D7_0112300-1	18S+ribosomal+RNA	PF3D7_0112300-1	2149	PF3D7_0112300
Pf3D7_01_v3	473994	G		256		0	0	0	6	2	8	1	1	1.49336	1.95804	rna_PF3D7_0112300-1	rna_PF3D7_0112300-1	Pf3D7_01_v3	473739	475887	PF3D7_0112300-1	18S+ribosomal+RNA	PF3D7_0112300-1	2149	PF3D7_0112300
Pf3D7_01_v3	473995	A		257		0	5	1	11	10	34	0.364849	0.439167	0.929689	2.62388	rna_PF3D7_0112300-1	rna_PF3D7_0112300-1	Pf3D7_01_v3	473739	475887	PF3D7_0112300-1	18S+ribosomal+RNA	PF3D7_0112300-1	2149	PF3D7_0112300
Pf3D7_01_v3	473996	A		258		0	0	0	13	12	11	1	1	0.915924	0.908824	rna_PF3D7_0112300-1	rna_PF3D7_0112300-1	Pf3D7_01_v3	473739	475887	PF3D7_0112300-1	18S+ribosomal+RNA	PF3D7_0112300-1	2149	PF3D7_0112300
Pf3D7_01_v3	473997	T		259		0	0	0	13	6	8	1	1	1.46991	1.16851	rna_PF3D7_0112300-1	rna_PF3D7_0112300-1	Pf3D7_01_v3	473739	475887	PF3D7_0112300-1	18S+ribosomal+RNA	PF3D7_0112300-1	2149	PF3D7_0112300
Pf3D7_01_v3	473998	T		260		0	3	1	18	15	24	0.489113	0.588743	0.987425	1.42362	rna_PF3D7_0112300-1	rna_PF3D7_0112300-1	Pf3D7_01_v3	473739	475887	PF3D7_0112300-1	18S+ribosomal+RNA	PF3D7_0112300-1	2149	PF3D7_0112300
Pf3D7_01_v3	473999	A		261		0	0	0	9	2	14	1	1	1.90896	2.92995	rna_PF3D7_0112300-1	rna_PF3D7_0112300-1	Pf3D7_01_v3	473739	475887	PF3D7_0112300-1	18S+ribosomal+RNA	PF3D7_0112300-1	2149	PF3D7_0112300
Pf3D7_01_v3	474000	T		262		0	3	0	17	6	8	0.489113	0.489113	1.8006	1.16851	rna_PF3D7_0112300-1	rna_PF3D7_0112300-1	Pf3D7_01_v3	473739	475887	PF3D7_0112300-1	18S+ribosomal+RNA	PF3D7_0112300-1	2149	PF3D7_0112300
Pf3D7_01_v3	474001	A		263		0	1	5	16	9	16	0.741745	1.49719	1.31903	1.49096	rna_PF3D7_0112300-1	rna_PF3D7_0112300-1	Pf3D7_01_v3	473739	475887	PF3D7_0112300-1	18S+ribosomal+RNA	PF3D7_0112300-1	2149	PF3D7_0112300
Pf3D7_01_v3	474002	A		264		0	0	0	9	2	5	1	1	1.90896	1.47209	rna_PF3D7_0112300-1	rna_PF3D7_0112300-1	Pf3D7_01_v3	473739	475887	PF3D7_0112300-1	18S+ribosomal+RNA	PF3D7_0112300-1	2149	PF3D7_0112300
Pf3D7_01_v3	474003	C		265		0	0	0	6	6	9	1	1	0.891199	1.26518	rna_PF3D7_0112300-1	rna_PF3D7_0112300-1	Pf3D7_01_v3	473739	475887	PF3D7_0112300-1	18S+ribosomal+RNA	PF3D7_0112300-1	2149	PF3D7_0112300
Pf3D7_01_v3	474004	A		266		1	1	1	8	15	6	0.890094	0.892835	0.55396	0.511296	rna_PF3D7_0112300-1	rna_PF3D7_0112300-1	Pf3D7_01_v3	473739	475887	PF3D7_0112300-1	18S+ribosomal+RNA	PF3D7_0112300-1	2149	PF3D7_0112300
Pf3D7_01_v3	474005	A		267		0	3	0	10	4	14	0.489113	0.489113	1.53045	2.19007	rna_PF3D7_0112300-1	rna_PF3D7_0112300-1	Pf3D7_01_v3	473739	475887	PF3D7_0112300-1	18S+ribosomal+RNA	PF3D7_0112300-1	2149	PF3D7_0112300
Pf3D7_01_v3	474006	A		268		0	0	0	1	1	7	1	1	0.963438	2.16111	rna_PF3D7_0112300-1	rna_PF3D7_0112300-1	Pf3D7_01_v3	473739	475887	PF3D7_0112300-1	18S+ribosomal+RNA	PF3D7_0112300-1	2149	PF3D7_0112300
Pf3D7_01_v3	474007	G		269		0	0	2	7	12	14	1	1.40739	0.606835	1.08953	rna_PF3D7_0112300-1	rna_PF3D7_0112300-1	Pf3D7_01_v3	473739	475887	PF3D7_0112300-1	18S+ribosomal+RNA	PF3D7_0112300-1	2149	PF3D7_0112300
Pf3D7_01_v3	474008	A		270		0	0	1	7	3	22	1	1.2037	1.39607	3.61517	rna_PF3D7_0112300-1	rna_PF3D7_0112300-1	Pf3D7_01_v3	473739	475887	PF3D7_0112300-1	18S+ribosomal+RNA	PF3D7_0112300-1	2149	PF3D7_0112300
Pf3D7_01_v3	474009	A		271		1	0	0	2	4	6	1.2	1	0.70205	1.22143	rna_PF3D7_0112300-1	rna_PF3D7_0112300-1	Pf3D7_01_v3	473739	475887	PF3D7_0112300-1	18S+ribosomal+RNA	PF3D7_0112300-1	2149	PF3D7_0112300
Pf3D7_01_v3	474010	G		272		3	0	0	8	6	12	1.6	1	1.05654	1.55518	rna_PF3D7_0112300-1	rna_PF3D7_0112300-1	Pf3D7_01_v3	473739	475887	PF3D7_0112300-1	18S+ribosomal+RNA	PF3D7_0112300-1	2149	PF3D7_0112300
Pf3D7_01_v3	474011	A		273		3	0	3	10	9	9	1.6	1.61109	0.93817	0.971407	rna_PF3D7_0112300-1	rna_PF3D7_0112300-1	Pf3D7_01_v3	473739	475887	PF3D7_0112300-1	18S+ribosomal+RNA	PF3D7_0112300-1	2149	PF3D7_0112300
Pf3D7_01_v3	474012	A		274		0	0	1	14	20	13	1	1.2037	0.643881	0.68505	rna_PF3D7_0112300-1	rna_PF3D7_0112300-1	Pf3D7_01_v3	473739	475887	PF3D7_0112300-1	18S+ribosomal+RNA	PF3D7_0112300-1	2149	PF3D7_0112300
Pf3D7_01_v3	474013	A		275		0	0	0	4	2	3	1	1	1.21629	1.14812	rna_PF3D7_0112300-1	rna_PF3D7_0112300-1	Pf3D7_01_v3	473739	475887	PF3D7_0112300-1	18S+ribosomal+RNA	PF3D7_0112300-1	2149	PF3D7_0112300
Pf3D7_01_v3	474014	C		276		0	0	0	4	12	4	1	1	0.452291	0.487174	rna_PF3D7_0112300-1	rna_PF3D7_0112300-1	Pf3D7_01_v3	473739	475887	PF3D7_0112300-1	18S+ribosomal+RNA	PF3D7_0112300-1	2149	PF3D7_0112300
Pf3D7_01_v3	474015	A		277		0	0	0	3	6	1	1	1	0.64318	0.49183	rna_PF3D7_0112300-1	rna_PF3D7_0112300-1	Pf3D7_01_v3	473739	475887	PF3D7_0112300-1	18S+ribosomal+RNA	PF3D7_0112300-1	2149	PF3D7_0112300
Pf3D7_01_v3	474016	C		278		0	0	0	8	10	5	1	1	0.75294	0.626061	rna_PF3D7_0112300-1	rna_PF3D7_0112300-1	Pf3D7_01_v3	473739	475887	PF3D7_0112300-1	18S+ribosomal+RNA	PF3D7_0112300-1	2149	PF3D7_0112300
Pf3D7_01_v3	474017	A		279		0	1	0	4	5	5	0.741745	0.741745	0.807227	0.976992	rna_PF3D7_0112300-1	rna_PF3D7_0112300-1	Pf3D7_01_v3	473739	475887	PF3D7_0112300-1	18S+ribosomal+RNA	PF3D7_0112300-1	2149	PF3D7_0112300
Pf3D7_01_v3	474018	T		280		0	3	0	5	5	1	0.489113	0.489113	0.899168	0.546968	rna_PF3D7_0112300-1	rna_PF3D7_0112300-1	Pf3D7_01_v3	473739	475887	PF3D7_0112300-1	18S+ribosomal+RNA	PF3D7_0112300-1	2149	PF3D7_0112300
Pf3D7_01_v3	474019	A		281		0	1	0	7	7	10	0.741745	0.741745	0.88469	1.23714	rna_PF3D7_0112300-1	rna_PF3D7_0112300-1	Pf3D7_01_v3	473739	475887	PF3D7_0112300-1	18S+ribosomal+RNA	PF3D7_0112300-1	2149	PF3D7_0112300
Pf3D7_01_v3	474020	A		282		0	0	2	3	2	26	1	1.40739	1.07776	4.87378	rna_PF3D7_0112300-1	rna_PF3D7_0112300-1	Pf3D7_01_v3	473739	475887	PF3D7_0112300-1	18S+ribosomal+RNA	PF3D7_0112300-1	2149	PF3D7_0112300
Pf3D7_01_v3	474021	A		283		0	1	5	9	10	27	0.741745	1.49719	0.811856	2.14165	rna_PF3D7_0112300-1	rna_PF3D7_0112300-1	Pf3D7_01_v3	473739	475887	PF3D7_0112300-1	18S+ribosomal+RNA	PF3D7_0112300-1	2149	PF3D7_0112300
Pf3D7_01_v3	474022	A		284		1	2	1	9	4	12	0.707403	0.709582	1.4269	1.94791	rna_PF3D7_0112300-1	rna_PF3D7_0112300-1	Pf3D7_01_v3	473739	475887	PF3D7_0112300-1	18S+ribosomal+RNA	PF3D7_0112300-1	2149	PF3D7_0112300
Pf3D7_01_v3	474023	T		285		0	3	0	5	13	6	0.489113	0.489113	0.47403	0.571733	rna_PF3D7_0112300-1	rna_PF3D7_0112300-1	Pf3D7_01_v3	473739	475887	PF3D7_0112300-1	18S+ribosomal+RNA	PF3D7_0112300-1	2149	PF3D7_0112300
Pf3D7_01_v3	474024	A		286		0	1	0	0	3	1	0.741745	0.741745	0.566474	0.705051	rna_PF3D7_0112300-1	rna_PF3D7_0112300-1	Pf3D7_01_v3	473739	475887	PF3D7_0112300-1	18S+ribosomal+RNA	PF3D7_0112300-1	2149	PF3D7_0112300
Pf3D7_01_v3	474025	T		287		0	0	0	4	3	1	1	1	1.04053	0.705051	rna_PF3D7_0112300-1	rna_PF3D7_0112300-1	Pf3D7_01_v3	473739	475887	PF3D7_0112300-1	18S+ribosomal+RNA	PF3D7_0112300-1	2149	PF3D7_0112300
Pf3D7_01_v3	474026	G		288		0	0	0	4	3	2	1	1	1.04053	0.843628	rna_PF3D7_0112300-1	rna_PF3D7_0112300-1	Pf3D7_01_v3	473739	475887	PF3D7_0112300-1	18S+ribosomal+RNA	PF3D7_0112300-1	2149	PF3D7_0112300
Pf3D7_01_v3	474027	T		289		0	0	0	1	0	1	1	1	1.20921	1.24463	rna_PF3D7_0112300-1	rna_PF3D7_0112300-1	Pf3D7_01_v3	473739	475887	PF3D7_0112300-1	18S+ribosomal+RNA	PF3D7_0112300-1	2149	PF3D7_0112300
Pf3D7_01_v3	474028	G		290		0	0	0	0	9	5	1	1	0.303406	0.674517	rna_PF3D7_0112300-1	rna_PF3D7_0112300-1	Pf3D7_01_v3	473739	475887	PF3D7_0112300-1	18S+ribosomal+RNA	PF3D7_0112300-1	2149	PF3D7_0112300
Pf3D7_01_v3	474029	T		291		1	0	2	3	13	9	1.2	1.40739	0.377089	0.74176	rna_PF3D7_0112300-1	rna_PF3D7_0112300-1	Pf3D7_01_v3	473739	475887	PF3D7_0112300-1	18S+ribosomal+RNA	PF3D7_0112300-1	2149	PF3D7_0112300
Pf3D7_01_v3	474030	A		292		0	1	1	7	7	12	0.741745	0.892835	0.88469	1.41277	rna_PF3D7_0112300-1	rna_PF3D7_0112300-1	Pf3D7_01_v3	473739	475887	PF3D7_0112300-1	18S+ribosomal+RNA	PF3D7_0112300-1	2149	PF3D7_0112300
Pf3D7_01_v3	474031	T		293		0	0	2	7	7	10	1	1.40739	0.88469	1.23714	rna_PF3D7_0112300-1	rna_PF3D7_0112300-1	Pf3D7_01_v3	473739	475887	PF3D7_0112300-1	18S+ribosomal+RNA	PF3D7_0112300-1	2149	PF3D7_0112300
Pf3D7_01_v3	474032	T		294		0	2	4	25	18	22	0.589503	1.06982	1.11418	1.14128	rna_PF3D7_0112300-1	rna_PF3D7_0112300-1	Pf3D7_01_v3	473739	475887	PF3D7_0112300-1	18S+ribosomal+RNA	PF3D7_0112300-1	2149	PF3D7_0112300
Pf3D7_01_v3	474033	A		295		0	0	2	15	9	16	1	1.40739	1.25555	1.49096	rna_PF3D7_0112300-1	rna_PF3D7_0112300-1	Pf3D7_01_v3	473739	475887	PF3D7_0112300-1	18S+ribosomal+RNA	PF3D7_0112300-1	2149	PF3D7_0112300
Pf3D7_01_v3	474034	T		296		0	0	2	15	3	10	1	1.40739	2.34418	1.95224	rna_PF3D7_0112300-1	rna_PF3D7_0112300-1	Pf3D7_01_v3	473739	475887	PF3D7_0112300-1	18S+ribosomal+RNA	PF3D7_0112300-1	2149	PF3D7_0112300
Pf3D7_01_v3	474035	C		297		1	1	0	5	2	9	0.890094	0.741745	1.35483	2.12003	rna_PF3D7_0112300-1	rna_PF3D7_0112300-1	Pf3D7_01_v3	473739	475887	PF3D7_0112300-1	18S+ribosomal+RNA	PF3D7_0112300-1	2149	PF3D7_0112300
Pf3D7_01_v3	474036	A		298		0	0	2	17	5	10	1	1.40739	2.00246	1.51452	rna_PF3D7_0112300-1	rna_PF3D7_0112300-1	Pf3D7_01_v3	473739	475887	PF3D7_0112300-1	18S+ribosomal+RNA	PF3D7_0112300-1	2149	PF3D7_0112300
Pf3D7_01_v3	474037	A		299		2	4	1	13	17	16	0.585116	0.503072	0.697013	0.920805	rna_PF3D7_0112300-1	rna_PF3D7_0112300-1	Pf3D7_01_v3	473739	475887	PF3D7_0112300-1	18S+ribosomal+RNA	PF3D7_0112300-1	2149	PF3D7_0112300
Pf3D7_01_v3	474038	T		300		0	0	0	3	3	7	1	1	0.922016	1.53651	rna_PF3D7_0112300-1	rna_PF3D7_0112300-1	Pf3D7_01_v3	473739	475887	PF3D7_0112300-1	18S+ribosomal+RNA	PF3D7_0112300-1	2149	PF3D7_0112300
Pf3D7_01_v3	474039	C		301		0	0	0	10	4	1	1	1	1.53045	0.61603	rna_PF3D7_0112300-1	rna_PF3D7_0112300-1	Pf3D7_01_v3	473739	475887	PF3D7_0112300-1	18S+ribosomal+RNA	PF3D7_0112300-1	2149	PF3D7_0112300
Pf3D7_01_v3	474040	G		302		0	0	0	10	0	1	1	1	3.09213	1.24463	rna_PF3D7_0112300-1	rna_PF3D7_0112300-1	Pf3D7_01_v3	473739	475887	PF3D7_0112300-1	18S+ribosomal+RNA	PF3D7_0112300-1	2149	PF3D7_0112300
Pf3D7_01_v3	474041	A		303		1	0	0	3	2	6	1.2	1	1.07776	1.63407	rna_PF3D7_0112300-1	rna_PF3D7_0112300-1	Pf3D7_01_v3	473739	475887	PF3D7_0112300-1	18S+ribosomal+RNA	PF3D7_0112300-1	2149	PF3D7_0112300
Pf3D7_01_v3	474042	G		304		0	0	0	9	3	1	1	1	1.6331	0.705051	rna_PF3D7_0112300-1	rna_PF3D7_0112300-1	Pf3D7_01_v3	473739	475887	PF3D7_0112300-1	18S+ribosomal+RNA	PF3D7_0112300-1	2149	PF3D7_0112300
Pf3D7_01_v3	474043	T		305		17	9	5	37	22	20	1.06446	0.488315	1.32192	0.891167	rna_PF3D7_0112300-1	rna_PF3D7_0112300-1	Pf3D7_01_v3	473739	475887	PF3D7_0112300-1	18S+ribosomal+RNA	PF3D7_0112300-1	2149	PF3D7_0112300
Pf3D7_01_v3	474044	A		306		90	20	51	119	44	69	2.3859	1.43009	2.1184	1.4626	rna_PF3D7_0112300-1	rna_PF3D7_0112300-1	Pf3D7_01_v3	473739	475887	PF3D7_0112300-1	18S+ribosomal+RNA	PF3D7_0112300-1	2149	PF3D7_0112300
Pf3D7_01_v3	474045	T		307		56	14	31	85	33	27	2.0768	1.24515	1.99431	0.807468	rna_PF3D7_0112300-1	rna_PF3D7_0112300-1	Pf3D7_01_v3	473739	475887	PF3D7_0112300-1	18S+ribosomal+RNA	PF3D7_0112300-1	2149	PF3D7_0112300
Pf3D7_01_v3	474046	C		308		30	7	18	59	10	16	2.03654	1.35765	3.75767	1.38385	rna_PF3D7_0112300-1	rna_PF3D7_0112300-1	Pf3D7_01_v3	473739	475887	PF3D7_0112300-1	18S+ribosomal+RNA	PF3D7_0112300-1	2149	PF3D7_0112300
Pf3D7_01_v3	474047	T		309		23	0	10	38	2	17	5.6	3.03695	5.92642	3.41591	rna_PF3D7_0112300-1	rna_PF3D7_0112300-1	Pf3D7_01_v3	473739	475887	PF3D7_0112300-1	18S+ribosomal+RNA	PF3D7_0112300-1	2149	PF3D7_0112300
Pf3D7_01_v3	474048	G		310		24	14	32	35	21	61	0.987333	1.27983	1.30915	2.50466	rna_PF3D7_0112300-1	rna_PF3D7_0112300-1	Pf3D7_01_v3	473739	475887	PF3D7_0112300-1	18S+ribosomal+RNA	PF3D7_0112300-1	2149	PF3D7_0112300
Pf3D7_01_v3	474049	A		311		16	8	10	28	9	4	1.10953	0.802285	2.08075	0.600295	rna_PF3D7_0112300-1	rna_PF3D7_0112300-1	Pf3D7_01_v3	473739	475887	PF3D7_0112300-1	18S+ribosomal+RNA	PF3D7_0112300-1	2149	PF3D7_0112300
Pf3D7_01_v3	474050	C		312		0	1	0	9	6	2	0.741745	0.741745	1.13922	0.588499	rna_PF3D7_0112300-1	rna_PF3D7_0112300-1	Pf3D7_01_v3	473739	475887	PF3D7_0112300-1	18S+ribosomal+RNA	PF3D7_0112300-1	2149	PF3D7_0112300
Pf3D7_01_v3	474051	C		313		0	0	0	5	6	6	1	1	0.808526	0.975173	rna_PF3D7_0112300-1	rna_PF3D7_0112300-1	Pf3D7_01_v3	473739	475887	PF3D7_0112300-1	18S+ribosomal+RNA	PF3D7_0112300-1	2149	PF3D7_0112300
Pf3D7_01_v3	474052	T		314		1	0	0	15	12	5	1.2	1	1.01895	0.54741	rna_PF3D7_0112300-1	rna_PF3D7_0112300-1	Pf3D7_01_v3	473739	475887	PF3D7_0112300-1	18S+ribosomal+RNA	PF3D7_0112300-1	2149	PF3D7_0112300
Pf3D7_01_v3	474053	A		315		2	0	0	6	15	7	1.4	1	0.467267	0.561981	rna_PF3D7_0112300-1	rna_PF3D7_0112300-1	Pf3D7_01_v3	473739	475887	PF3D7_0112300-1	18S+ribosomal+RNA	PF3D7_0112300-1	2149	PF3D7_0112300
Pf3D7_01_v3	474054	T		316		0	0	0	3	2	4	1	1	1.07776	1.3101	rna_PF3D7_0112300-1	rna_PF3D7_0112300-1	Pf3D7_01_v3	473739	475887	PF3D7_0112300-1	18S+ribosomal+RNA	PF3D7_0112300-1	2149	PF3D7_0112300
Pf3D7_01_v3	474055	C		317		0	1	1	6	4	2	0.741745	0.892835	1.11625	0.737109	rna_PF3D7_0112300-1	rna_PF3D7_0112300-1	Pf3D7_01_v3	473739	475887	PF3D7_0112300-1	18S+ribosomal+RNA	PF3D7_0112300-1	2149	PF3D7_0112300
Pf3D7_01_v3	474056	A		318		0	0	0	3	2	1	1	1	1.07776	0.824148	rna_PF3D7_0112300-1	rna_PF3D7_0112300-1	Pf3D7_01_v3	473739	475887	PF3D7_0112300-1	18S+ribosomal+RNA	PF3D7_0112300-1	2149	PF3D7_0112300
Pf3D7_01_v3	474057	G		319		0	0	0	1	1	0	1	1	0.963438	0.796748	rna_PF3D7_0112300-1	rna_PF3D7_0112300-1	Pf3D7_01_v3	473739	475887	PF3D7_0112300-1	18S+ribosomal+RNA	PF3D7_0112300-1	2149	PF3D7_0112300
Pf3D7_01_v3	474058	C		320		0	0	2	8	19	1	1	1.40739	0.457283	0.212869	rna_PF3D7_0112300-1	rna_PF3D7_0112300-1	Pf3D7_01_v3	473739	475887	PF3D7_0112300-1	18S+ribosomal+RNA	PF3D7_0112300-1	2149	PF3D7_0112300
Pf3D7_01_v3	474059	T		321		2	2	0	3	16	10	0.825304	0.589503	0.320299	0.678189	rna_PF3D7_0112300-1	rna_PF3D7_0112300-1	Pf3D7_01_v3	473739	475887	PF3D7_0112300-1	18S+ribosomal+RNA	PF3D7_0112300-1	2149	PF3D7_0112300
Pf3D7_01_v3	474060	T		322		1	2	2	3	10	12	0.707403	0.829661	0.458358	1.10829	rna_PF3D7_0112300-1	rna_PF3D7_0112300-1	Pf3D7_01_v3	473739	475887	PF3D7_0112300-1	18S+ribosomal+RNA	PF3D7_0112300-1	2149	PF3D7_0112300
Pf3D7_01_v3	474061	T		323		3	1	3	7	14	16	1.18679	1.19501	0.539108	1.07496	rna_PF3D7_0112300-1	rna_PF3D7_0112300-1	Pf3D7_01_v3	473739	475887	PF3D7_0112300-1	18S+ribosomal+RNA	PF3D7_0112300-1	2149	PF3D7_0112300
Pf3D7_01_v3	474062	T		324		1	0	5	11	1	5	1.2	2.01848	2.63034	1.77129	rna_PF3D7_0112300-1	rna_PF3D7_0112300-1	Pf3D7_01_v3	473739	475887	PF3D7_0112300-1	18S+ribosomal+RNA	PF3D7_0112300-1	2149	PF3D7_0112300
Pf3D7_01_v3	474063	G		325		0	0	6	15	12	35	1	2.22217	1.01895	2.35448	rna_PF3D7_0112300-1	rna_PF3D7_0112300-1	Pf3D7_01_v3	473739	475887	PF3D7_0112300-1	18S+ribosomal+RNA	PF3D7_0112300-1	2149	PF3D7_0112300
Pf3D7_01_v3	474064	A		326		0	2	0	4	7	3	0.589503	0.589503	0.659383	0.622423	rna_PF3D7_0112300-1	rna_PF3D7_0112300-1	Pf3D7_01_v3	473739	475887	PF3D7_0112300-1	18S+ribosomal+RNA	PF3D7_0112300-1	2149	PF3D7_0112300
Pf3D7_01_v3	474065	T		327		0	2	0	7	3	6	0.589503	0.589503	1.39607	1.39794	rna_PF3D7_0112300-1	rna_PF3D7_0112300-1	Pf3D7_01_v3	473739	475887	PF3D7_0112300-1	18S+ribosomal+RNA	PF3D7_0112300-1	2149	PF3D7_0112300
Pf3D7_01_v3	474066	G		328		0	0	0	8	5	3	1	1	1.17499	0.76198	rna_PF3D7_0112300-1	rna_PF3D7_0112300-1	Pf3D7_01_v3	473739	475887	PF3D7_0112300-1	18S+ribosomal+RNA	PF3D7_0112300-1	2149	PF3D7_0112300
Pf3D7_01_v3	474067	T		329		0	2	0	5	12	0	0.589503	0.589503	0.503805	0.246231	rna_PF3D7_0112300-1	rna_PF3D7_0112300-1	Pf3D7_01_v3	473739	475887	PF3D7_0112300-1	18S+ribosomal+RNA	PF3D7_0112300-1	2149	PF3D7_0112300
Pf3D7_01_v3	474068	T		330		2	0	0	6	3	3	1.4	1	1.27756	0.982205	rna_PF3D7_0112300-1	rna_PF3D7_0112300-1	Pf3D7_01_v3	473739	475887	PF3D7_0112300-1	18S+ribosomal+RNA	PF3D7_0112300-1	2149	PF3D7_0112300
Pf3D7_01_v3	474069	A		331		0	0	0	3	0	0	1	1	1.62764	1	rna_PF3D7_0112300-1	rna_PF3D7_0112300-1	Pf3D7_01_v3	473739	475887	PF3D7_0112300-1	18S+ribosomal+RNA	PF3D7_0112300-1	2149	PF3D7_0112300
Pf3D7_01_v3	474071	G		333		3	0	1	0	0	0	1.6	1.2037	1	1	rna_PF3D7_0112300-1	rna_PF3D7_0112300-1	Pf3D7_01_v3	473739	475887	PF3D7_0112300-1	18S+ribosomal+RNA	PF3D7_0112300-1	2149	PF3D7_0112300
Pf3D7_01_v3	474072	G		334		0	3	0	6	7	2	0.489113	0.489113	0.809587	0.534607	rna_PF3D7_0112300-1	rna_PF3D7_0112300-1	Pf3D7_01_v3	473739	475887	PF3D7_0112300-1	18S+ribosomal+RNA	PF3D7_0112300-1	2149	PF3D7_0112300
Pf3D7_01_v3	474073	T		335		2	0	4	11	15	30	1.4	1.81478	0.684	1.72773	rna_PF3D7_0112300-1	rna_PF3D7_0112300-1	Pf3D7_01_v3	473739	475887	PF3D7_0112300-1	18S+ribosomal+RNA	PF3D7_0112300-1	2149	PF3D7_0112300
Pf3D7_01_v3	474074	A		336		1	2	5	13	12	13	0.707403	1.1899	0.915924	1.0293	rna_PF3D7_0112300-1	rna_PF3D7_0112300-1	Pf3D7_01_v3	473739	475887	PF3D7_0112300-1	18S+ribosomal+RNA	PF3D7_0112300-1	2149	PF3D7_0112300
Pf3D7_01_v3	474075	T		337		0	1	1	8	4	8	0.741745	0.892835	1.32335	1.46359	rna_PF3D7_0112300-1	rna_PF3D7_0112300-1	Pf3D7_01_v3	473739	475887	PF3D7_0112300-1	18S+ribosomal+RNA	PF3D7_0112300-1	2149	PF3D7_0112300
Pf3D7_01_v3	474076	T		338		1	1	0	2	1	4	0.890094	0.741745	1.13013	1.57638	rna_PF3D7_0112300-1	rna_PF3D7_0112300-1	Pf3D7_01_v3	473739	475887	PF3D7_0112300-1	18S+ribosomal+RNA	PF3D7_0112300-1	2149	PF3D7_0112300
Pf3D7_01_v3	474077	G		339		3	3	19	7	11	43	0.782581	2.38208	0.647507	3.02647	rna_PF3D7_0112300-1	rna_PF3D7_0112300-1	Pf3D7_01_v3	473739	475887	PF3D7_0112300-1	18S+ribosomal+RNA	PF3D7_0112300-1	2149	PF3D7_0112300
Pf3D7_01_v3	474078	A		340		304	419	1563	259	659	1422	0.42074	2.17434	0.326329	2.06292	rna_PF3D7_0112300-1	rna_PF3D7_0112300-1	Pf3D7_01_v3	473739	475887	PF3D7_0112300-1	18S+ribosomal+RNA	PF3D7_0112300-1	2149	PF3D7_0112300
Pf3D7_01_v3	474079	C		341		176	579	114	175	856	266	0.178684	0.119557	0.171458	0.301193	rna_PF3D7_0112300-1	rna_PF3D7_0112300-1	Pf3D7_01_v3	473739	475887	PF3D7_0112300-1	18S+ribosomal+RNA	PF3D7_0112300-1	2149	PF3D7_0112300
Pf3D7_01_v3	474080	C		342		304	341	129	353	377	155	0.516175	0.227824	0.770295	0.400498	rna_PF3D7_0112300-1	rna_PF3D7_0112300-1	Pf3D7_01_v3	473739	475887	PF3D7_0112300-1	18S+ribosomal+RNA	PF3D7_0112300-1	2149	PF3D7_0112300
Pf3D7_01_v3	474081	T		343		872	1746	402	857	2302	355	0.288056	0.136121	0.306498	0.149332	rna_PF3D7_0112300-1	rna_PF3D7_0112300-1	Pf3D7_01_v3	473739	475887	PF3D7_0112300-1	18S+ribosomal+RNA	PF3D7_0112300-1	2149	PF3D7_0112300
Pf3D7_01_v3	474082	A		344		1714	2715	966	1830	3603	846	0.363314	0.208995	0.417179	0.226008	rna_PF3D7_0112300-1	rna_PF3D7_0112300-1	Pf3D7_01_v3	473739	475887	PF3D7_0112300-1	18S+ribosomal+RNA	PF3D7_0112300-1	2149	PF3D7_0112300
Pf3D7_01_v3	474083	A		345		447	438	122	629	475	205	0.588927	0.16841	1.0853	0.418661	rna_PF3D7_0112300-1	rna_PF3D7_0112300-1	Pf3D7_01_v3	473739	475887	PF3D7_0112300-1	18S+ribosomal+RNA	PF3D7_0112300-1	2149	PF3D7_0112300
Pf3D7_01_v3	474084	C		346		1512	2480	1058	1665	2915	768	0.350967	0.250454	0.46915	0.253654	rna_PF3D7_0112300-1	rna_PF3D7_0112300-1	Pf3D7_01_v3	473739	475887	PF3D7_0112300-1	18S+ribosomal+RNA	PF3D7_0112300-1	2149	PF3D7_0112300
Pf3D7_01_v3	474085	A		347		589	455	244	720	537	310	0.745209	0.318041	1.09887	0.556821	rna_PF3D7_0112300-1	rna_PF3D7_0112300-1	Pf3D7_01_v3	473739	475887	PF3D7_0112300-1	18S+ribosomal+RNA	PF3D7_0112300-1	2149	PF3D7_0112300
Pf3D7_01_v3	474086	T		348		359	242	189	442	350	240	0.853882	0.463282	1.03529	0.66136	rna_PF3D7_0112300-1	rna_PF3D7_0112300-1	Pf3D7_01_v3	473739	475887	PF3D7_0112300-1	18S+ribosomal+RNA	PF3D7_0112300-1	2149	PF3D7_0112300
Pf3D7_01_v3	474087	G		349		212	230	185	333	336	236	0.535276	0.477106	0.814952	0.677315	rna_PF3D7_0112300-1	rna_PF3D7_0112300-1	Pf3D7_01_v3	473739	475887	PF3D7_0112300-1	18S+ribosomal+RNA	PF3D7_0112300-1	2149	PF3D7_0112300
Pf3D7_01_v3	474088	G		350		227	345	80	260	594	126	0.383093	0.142798	0.363176	0.208637	rna_PF3D7_0112300-1	rna_PF3D7_0112300-1	Pf3D7_01_v3	473739	475887	PF3D7_0112300-1	18S+ribosomal+RNA	PF3D7_0112300-1	2149	PF3D7_0112300
Pf3D7_01_v3	474089	C		351		307	746	82	428	1244	150	0.239322	0.0678961	0.284417	0.118407	rna_PF3D7_0112300-1	rna_PF3D7_0112300-1	Pf3D7_01_v3	473739	475887	PF3D7_0112300-1	18S+ribosomal+RNA	PF3D7_0112300-1	2149	PF3D7_0112300
Pf3D7_01_v3	474090	T		352		761	1563	731	1160	2368	1054	0.281001	0.27495	0.402735	0.427778	rna_PF3D7_0112300-1	rna_PF3D7_0112300-1	Pf3D7_01_v3	473739	475887	PF3D7_0112300-1	18S+ribosomal+RNA	PF3D7_0112300-1	2149	PF3D7_0112300
Pf3D7_01_v3	474091	A		353		782	435	1340	1039	589	1839	1.03244	1.79693	1.44374	2.9809	rna_PF3D7_0112300-1	rna_PF3D7_0112300-1	Pf3D7_01_v3	473739	475887	PF3D7_0112300-1	18S+ribosomal+RNA	PF3D7_0112300-1	2149	PF3D7_0112300
Pf3D7_01_v3	474092	T		354		327	258	248	460	330	468	0.731048	0.567183	1.14151	1.35574	rna_PF3D7_0112300-1	rna_PF3D7_0112300-1	Pf3D7_01_v3	473739	475887	PF3D7_0112300-1	18S+ribosomal+RNA	PF3D7_0112300-1	2149	PF3D7_0112300
Pf3D7_01_v3	474093	G		355		663	1013	334	1114	1664	650	0.377723	0.195178	0.550104	0.376061	rna_PF3D7_0112300-1	rna_PF3D7_0112300-1	Pf3D7_01_v3	473739	475887	PF3D7_0112300-1	18S+ribosomal+RNA	PF3D7_0112300-1	2149	PF3D7_0112300
Pf3D7_01_v3	474094	A		356		221	137	67	412	188	163	0.928139	0.300774	1.78099	0.834876	rna_PF3D7_0112300-1	rna_PF3D7_0112300-1	Pf3D7_01_v3	473739	475887	PF3D7_0112300-1	18S+ribosomal+RNA	PF3D7_0112300-1	2149	PF3D7_0112300
Pf3D7_01_v3	474095	C		357		163	151	44	226	177	114	0.62717	0.185959	1.04613	0.625915	rna_PF3D7_0112300-1	rna_PF3D7_0112300-1	Pf3D7_01_v3	473739	475887	PF3D7_0112300-1	18S+ribosomal+RNA	PF3D7_0112300-1	2149	PF3D7_0112300
Pf3D7_01_v3	474096	G		358		121	60	19	175	89	159	1.15119	0.222482	1.58674	1.6831	rna_PF3D7_0112300-1	rna_PF3D7_0112300-1	Pf3D7_01_v3	473739	475887	PF3D7_0112300-1	18S+ribosomal+RNA	PF3D7_0112300-1	2149	PF3D7_0112300
Pf3D7_01_v3	474097	G		359		201	192	43	287	283	37	0.60723	0.143832	0.834007	0.137325	rna_PF3D7_0112300-1	rna_PF3D7_0112300-1	Pf3D7_01_v3	473739	475887	PF3D7_0112300-1	18S+ribosomal+RNA	PF3D7_0112300-1	2149	PF3D7_0112300
Pf3D7_01_v3	474098	G		360		363	270	61	513	463	95	0.774683	0.14131	0.909448	0.203505	rna_PF3D7_0112300-1	rna_PF3D7_0112300-1	Pf3D7_01_v3	473739	475887	PF3D7_0112300-1	18S+ribosomal+RNA	PF3D7_0112300-1	2149	PF3D7_0112300
Pf3D7_01_v3	474099	T		361		734	586	369	1152	980	628	0.720874	0.371477	0.964198	0.616048	rna_PF3D7_0112300-1	rna_PF3D7_0112300-1	Pf3D7_01_v3	473739	475887	PF3D7_0112300-1	18S+ribosomal+RNA	PF3D7_0112300-1	2149	PF3D7_0112300
Pf3D7_01_v3	474100	A		362		1108	995	1735	2087	1838	2876	0.640702	1.02009	0.931366	1.49945	rna_PF3D7_0112300-1	rna_PF3D7_0112300-1	Pf3D7_01_v3	473739	475887	PF3D7_0112300-1	18S+ribosomal+RNA	PF3D7_0112300-1	2149	PF3D7_0112300
Pf3D7_01_v3	474101	A		363		393	173	440	773	257	818	1.29994	1.48	2.44469	3.0214	rna_PF3D7_0112300-1	rna_PF3D7_0112300-1	Pf3D7_01_v3	473739	475887	PF3D7_0112300-1	18S+ribosomal+RNA	PF3D7_0112300-1	2149	PF3D7_0112300
Pf3D7_01_v3	474102	C		364		259	150	217	456	169	461	0.991999	0.849246	2.18536	2.57921	rna_PF3D7_0112300-1	rna_PF3D7_0112300-1	Pf3D7_01_v3	473739	475887	PF3D7_0112300-1	18S+ribosomal+RNA	PF3D7_0112300-1	2149	PF3D7_0112300
Pf3D7_01_v3	474103	G		365		212	84	269	362	120	485	1.43488	1.84464	2.42739	3.7848	rna_PF3D7_0112300-1	rna_PF3D7_0112300-1	Pf3D7_01_v3	473739	475887	PF3D7_0112300-1	18S+ribosomal+RNA	PF3D7_0112300-1	2149	PF3D7_0112300
Pf3D7_01_v3	474104	G		366		177	79	102	248	116	203	1.27694	0.763951	1.72872	1.656	rna_PF3D7_0112300-1	rna_PF3D7_0112300-1	Pf3D7_01_v3	473739	475887	PF3D7_0112300-1	18S+ribosomal+RNA	PF3D7_0112300-1	2149	PF3D7_0112300
Pf3D7_01_v3	474105	G		367		268	101	85	364	176	185	1.50973	0.506398	1.68098	1.00782	rna_PF3D7_0112300-1	rna_PF3D7_0112300-1	Pf3D7_01_v3	473739	475887	PF3D7_0112300-1	18S+ribosomal+RNA	PF3D7_0112300-1	2149	PF3D7_0112300
Pf3D7_01_v3	474106	G		368		488	328	211	832	626	332	0.855899	0.381766	1.08943	0.51164	rna_PF3D7_0112300-1	rna_PF3D7_0112300-1	Pf3D7_01_v3	473739	475887	PF3D7_0112300-1	18S+ribosomal+RNA	PF3D7_0112300-1	2149	PF3D7_0112300
Pf3D7_01_v3	474107	A		369		761	844	334	1401	1442	745	0.519573	0.234127	0.797349	0.496805	rna_PF3D7_0112300-1	rna_PF3D7_0112300-1	Pf3D7_01_v3	473739	475887	PF3D7_0112300-1	18S+ribosomal+RNA	PF3D7_0112300-1	2149	PF3D7_0112300
Pf3D7_01_v3	474108	A		370		723	789	393	1338	1447	673	0.528095	0.293978	0.758991	0.447506	rna_PF3D7_0112300-1	rna_PF3D7_0112300-1	Pf3D7_01_v3	473739	475887	PF3D7_0112300-1	18S+ribosomal+RNA	PF3D7_0112300-1	2149	PF3D7_0112300
Pf3D7_01_v3	474109	T		371		777	1044	535	1288	1791	900	0.42909	0.301727	0.590683	0.483017	rna_PF3D7_0112300-1	rna_PF3D7_0112300-1	Pf3D7_01_v3	473739	475887	PF3D7_0112300-1	18S+ribosomal+RNA	PF3D7_0112300-1	2149	PF3D7_0112300
Pf3D7_01_v3	474110	T		372		770	552	770	1220	915	1185	0.802314	0.817042	1.09309	1.24089	rna_PF3D7_0112300-1	rna_PF3D7_0112300-1	Pf3D7_01_v3	473739	475887	PF3D7_0112300-1	18S+ribosomal+RNA	PF3D7_0112300-1	2149	PF3D7_0112300
Pf3D7_01_v3	474111	A		373		484	341	390	698	503	658	0.81686	0.671872	1.13699	1.25249	rna_PF3D7_0112300-1	rna_PF3D7_0112300-1	Pf3D7_01_v3	473739	475887	PF3D7_0112300-1	18S+ribosomal+RNA	PF3D7_0112300-1	2149	PF3D7_0112300
Pf3D7_01_v3	474112	G		374		552	436	634	819	785	909	0.729042	0.851702	0.856354	1.10988	rna_PF3D7_0112300-1	rna_PF3D7_0112300-1	Pf3D7_01_v3	473739	475887	PF3D7_0112300-1	18S+ribosomal+RNA	PF3D7_0112300-1	2149	PF3D7_0112300
Pf3D7_01_v3	474113	A		375		507	150	499	661	250	880	1.92388	1.92846	2.15035	3.33884	rna_PF3D7_0112300-1	rna_PF3D7_0112300-1	Pf3D7_01_v3	473739	475887	PF3D7_0112300-1	18S+ribosomal+RNA	PF3D7_0112300-1	2149	PF3D7_0112300
Pf3D7_01_v3	474114	G		376		462	188	527	730	357	859	1.40543	1.63035	1.66963	2.2932	rna_PF3D7_0112300-1	rna_PF3D7_0112300-1	Pf3D7_01_v3	473739	475887	PF3D7_0112300-1	18S+ribosomal+RNA	PF3D7_0112300-1	2149	PF3D7_0112300
Pf3D7_01_v3	474115	T		377		672	714	884	1052	997	1462	0.542479	0.725441	0.865885	1.40462	rna_PF3D7_0112300-1	rna_PF3D7_0112300-1	Pf3D7_01_v3	473739	475887	PF3D7_0112300-1	18S+ribosomal+RNA	PF3D7_0112300-1	2149	PF3D7_0112300
Pf3D7_01_v3	474116	T		378		353	262	241	430	375	444	0.776394	0.543157	0.941016	1.134	rna_PF3D7_0112300-1	rna_PF3D7_0112300-1	Pf3D7_01_v3	473739	475887	PF3D7_0112300-1	18S+ribosomal+RNA	PF3D7_0112300-1	2149	PF3D7_0112300
Pf3D7_01_v3	474117	C		379		223	203	154	328	341	311	0.63617	0.451584	0.79125	0.876013	rna_PF3D7_0112300-1	rna_PF3D7_0112300-1	Pf3D7_01_v3	473739	475887	PF3D7_0112300-1	18S+ribosomal+RNA	PF3D7_0112300-1	2149	PF3D7_0112300
Pf3D7_01_v3	474118	G		380		594	527	324	900	728	558	0.649369	0.363155	1.01381	0.736441	rna_PF3D7_0112300-1	rna_PF3D7_0112300-1	Pf3D7_01_v3	473739	475887	PF3D7_0112300-1	18S+ribosomal+RNA	PF3D7_0112300-1	2149	PF3D7_0112300
Pf3D7_01_v3	474119	A		381		493	243	217	751	261	337	1.16347	0.528023	2.33968	1.23466	rna_PF3D7_0112300-1	rna_PF3D7_0112300-1	Pf3D7_01_v3	473739	475887	PF3D7_0112300-1	18S+ribosomal+RNA	PF3D7_0112300-1	2149	PF3D7_0112300
Pf3D7_01_v3	474120	T		382		549	381	251	740	484	352	0.829008	0.390019	1.25186	0.699851	rna_PF3D7_0112300-1	rna_PF3D7_0112300-1	Pf3D7_01_v3	473739	475887	PF3D7_0112300-1	18S+ribosomal+RNA	PF3D7_0112300-1	2149	PF3D7_0112300
Pf3D7_01_v3	474121	T		383		412	287	154	552	368	194	0.826352	0.320722	1.22775	0.510747	rna_PF3D7_0112300-1	rna_PF3D7_0112300-1	Pf3D7_01_v3	473739	475887	PF3D7_0112300-1	18S+ribosomal+RNA	PF3D7_0112300-1	2149	PF3D7_0112300
Pf3D7_01_v3	474122	C		384		198	186	66	275	214	84	0.617396	0.219645	1.05292	0.387629	rna_PF3D7_0112300-1	rna_PF3D7_0112300-1	Pf3D7_01_v3	473739	475887	PF3D7_0112300-1	18S+ribosomal+RNA	PF3D7_0112300-1	2149	PF3D7_0112300
Pf3D7_01_v3	474123	C		385		192	84	52	196	81	93	1.30263	0.383256	1.93903	1.09636	rna_PF3D7_0112300-1	rna_PF3D7_0112300-1	Pf3D7_01_v3	473739	475887	PF3D7_0112300-1	18S+ribosomal+RNA	PF3D7_0112300-1	2149	PF3D7_0112300
Pf3D7_01_v3	474124	G		386		251	70	177	288	96	245	2.01797	1.46043	2.40306	2.39055	rna_PF3D7_0112300-1	rna_PF3D7_0112300-1	Pf3D7_01_v3	473739	475887	PF3D7_0112300-1	18S+ribosomal+RNA	PF3D7_0112300-1	2149	PF3D7_0112300
Pf3D7_01_v3	474125	G		387		401	289	651	444	371	804	0.799041	1.31473	0.98168	2.06689	rna_PF3D7_0112300-1	rna_PF3D7_0112300-1	Pf3D7_01_v3	473739	475887	PF3D7_0112300-1	18S+ribosomal+RNA	PF3D7_0112300-1	2149	PF3D7_0112300
Pf3D7_01_v3	474126	A		388		173	113	164	218	160	235	0.882423	0.852827	1.1146	1.39869	rna_PF3D7_0112300-1	rna_PF3D7_0112300-1	Pf3D7_01_v3	473739	475887	PF3D7_0112300-1	18S+ribosomal+RNA	PF3D7_0112300-1	2149	PF3D7_0112300
Pf3D7_01_v3	474127	G		389		286	200	468	418	250	591	0.82396	1.36377	1.3655	2.24741	rna_PF3D7_0112300-1	rna_PF3D7_0112300-1	Pf3D7_01_v3	473739	475887	PF3D7_0112300-1	18S+ribosomal+RNA	PF3D7_0112300-1	2149	PF3D7_0112300
Pf3D7_01_v3	474128	A		390		201	85	230	227	112	241	1.34664	1.564	1.63981	2.0275	rna_PF3D7_0112300-1	rna_PF3D7_0112300-1	Pf3D7_01_v3	473739	475887	PF3D7_0112300-1	18S+ribosomal+RNA	PF3D7_0112300-1	2149	PF3D7_0112300
Pf3D7_01_v3	474129	G		391		143	65	158	178	100	211	1.25258	1.40424	1.44246	1.98479	rna_PF3D7_0112300-1	rna_PF3D7_0112300-1	Pf3D7_01_v3	473739	475887	PF3D7_0112300-1	18S+ribosomal+RNA	PF3D7_0112300-1	2149	PF3D7_0112300
Pf3D7_01_v3	474130	G		392		149	39	93	155	53	124	2.11267	1.368	2.30214	2.15794	rna_PF3D7_0112300-1	rna_PF3D7_0112300-1	Pf3D7_01_v3	473739	475887	PF3D7_0112300-1	18S+ribosomal+RNA	PF3D7_0112300-1	2149	PF3D7_0112300
Pf3D7_01_v3	474131	G		393		236	35	107	260	25	122	3.65538	1.72875	7.50865	4.18092	rna_PF3D7_0112300-1	rna_PF3D7_0112300-1	Pf3D7_01_v3	473739	475887	PF3D7_0112300-1	18S+ribosomal+RNA	PF3D7_0112300-1	2149	PF3D7_0112300
Pf3D7_01_v3	474132	A		394		201	114	72	216	172	97	1.01249	0.384994	1.02925	0.551037	rna_PF3D7_0112300-1	rna_PF3D7_0112300-1	Pf3D7_01_v3	473739	475887	PF3D7_0112300-1	18S+ribosomal+RNA	PF3D7_0112300-1	2149	PF3D7_0112300
Pf3D7_01_v3	474133	G		395		152	134	25	160	149	48	0.658901	0.127843	0.88372	0.32664	rna_PF3D7_0112300-1	rna_PF3D7_0112300-1	Pf3D7_01_v3	473739	475887	PF3D7_0112300-1	18S+ribosomal+RNA	PF3D7_0112300-1	2149	PF3D7_0112300
Pf3D7_01_v3	474134	C		396		119	157	141	138	208	165	0.445538	0.533945	0.552548	0.765134	rna_PF3D7_0112300-1	rna_PF3D7_0112300-1	Pf3D7_01_v3	473739	475887	PF3D7_0112300-1	18S+ribosomal+RNA	PF3D7_0112300-1	2149	PF3D7_0112300
Pf3D7_01_v3	474135	C		397		141	171	153	155	259	182	0.482346	0.53133	0.498395	0.678721	rna_PF3D7_0112300-1	rna_PF3D7_0112300-1	Pf3D7_01_v3	473739	475887	PF3D7_0112300-1	18S+ribosomal+RNA	PF3D7_0112300-1	2149	PF3D7_0112300
Pf3D7_01_v3	474136	T		398		184	152	106	191	238	146	0.70101	0.418968	0.663699	0.594937	rna_PF3D7_0112300-1	rna_PF3D7_0112300-1	Pf3D7_01_v3	473739	475887	PF3D7_0112300-1	18S+ribosomal+RNA	PF3D7_0112300-1	2149	PF3D7_0112300
Pf3D7_01_v3	474137	G		399		299	183	281	345	263	358	0.939496	0.899913	1.0747	1.30086	rna_PF3D7_0112300-1	rna_PF3D7_0112300-1	Pf3D7_01_v3	473739	475887	PF3D7_0112300-1	18S+ribosomal+RNA	PF3D7_0112300-1	2149	PF3D7_0112300
Pf3D7_01_v3	474138	A		400		237	184	265	232	256	384	0.743886	0.845006	0.747102	1.43182	rna_PF3D7_0112300-1	rna_PF3D7_0112300-1	Pf3D7_01_v3	473739	475887	PF3D7_0112300-1	18S+ribosomal+RNA	PF3D7_0112300-1	2149	PF3D7_0112300
Pf3D7_01_v3	474139	G		401		457	644	574	582	920	734	0.41026	0.523575	0.520854	0.766074	rna_PF3D7_0112300-1	rna_PF3D7_0112300-1	Pf3D7_01_v3	473739	475887	PF3D7_0112300-1	18S+ribosomal+RNA	PF3D7_0112300-1	2149	PF3D7_0112300
Pf3D7_01_v3	474140	A		402		249	81	240	332	75	376	1.73961	1.70834	3.49973	4.61843	rna_PF3D7_0112300-1	rna_PF3D7_0112300-1	Pf3D7_01_v3	473739	475887	PF3D7_0112300-1	18S+ribosomal+RNA	PF3D7_0112300-1	2149	PF3D7_0112300
Pf3D7_01_v3	474141	A		403		448	370	604	576	465	710	0.697869	0.955387	1.01575	1.46033	rna_PF3D7_0112300-1	rna_PF3D7_0112300-1	Pf3D7_01_v3	473739	475887	PF3D7_0112300-1	18S+ribosomal+RNA	PF3D7_0112300-1	2149	PF3D7_0112300
Pf3D7_01_v3	474142	A		404		403	255	534	555	312	627	0.908848	1.22264	1.45317	1.91562	rna_PF3D7_0112300-1	rna_PF3D7_0112300-1	Pf3D7_01_v3	473739	475887	PF3D7_0112300-1	18S+ribosomal+RNA	PF3D7_0112300-1	2149	PF3D7_0112300
Pf3D7_01_v3	474143	T		405		358	362	539	471	497	688	0.571481	0.872112	0.778956	1.32492	rna_PF3D7_0112300-1	rna_PF3D7_0112300-1	Pf3D7_01_v3	473739	475887	PF3D7_0112300-1	18S+ribosomal+RNA	PF3D7_0112300-1	2149	PF3D7_0112300
Pf3D7_01_v3	474144	A		406		267	203	252	361	278	358	0.758939	0.730077	1.06407	1.23164	rna_PF3D7_0112300-1	rna_PF3D7_0112300-1	Pf3D7_01_v3	473739	475887	PF3D7_0112300-1	18S+ribosomal+RNA	PF3D7_0112300-1	2149	PF3D7_0112300
Pf3D7_01_v3	474145	G		407		210	70	132	229	84	186	1.69478	1.09915	2.18069	2.07331	rna_PF3D7_0112300-1	rna_PF3D7_0112300-1	Pf3D7_01_v3	473739	475887	PF3D7_0112300-1	18S+ribosomal+RNA	PF3D7_0112300-1	2149	PF3D7_0112300
Pf3D7_01_v3	474146	C		408		211	58	172	274	65	214	2.03831	1.70027	3.31735	3.03447	rna_PF3D7_0112300-1	rna_PF3D7_0112300-1	Pf3D7_01_v3	473739	475887	PF3D7_0112300-1	18S+ribosomal+RNA	PF3D7_0112300-1	2149	PF3D7_0112300
Pf3D7_01_v3	474147	T		409		389	394	164	456	512	239	0.570271	0.248994	0.732464	0.451833	rna_PF3D7_0112300-1	rna_PF3D7_0112300-1	Pf3D7_01_v3	473739	475887	PF3D7_0112300-1	18S+ribosomal+RNA	PF3D7_0112300-1	2149	PF3D7_0112300
Pf3D7_01_v3	474148	A		410		256	140	156	324	175	184	1.04937	0.658901	1.50703	1.00809	rna_PF3D7_0112300-1	rna_PF3D7_0112300-1	Pf3D7_01_v3	473739	475887	PF3D7_0112300-1	18S+ribosomal+RNA	PF3D7_0112300-1	2149	PF3D7_0112300
Pf3D7_01_v3	474149	C		411		170	194	32	224	290	66	0.51061	0.109683	0.638357	0.228671	rna_PF3D7_0112300-1	rna_PF3D7_0112300-1	Pf3D7_01_v3	473739	475887	PF3D7_0112300-1	18S+ribosomal+RNA	PF3D7_0112300-1	2149	PF3D7_0112300
Pf3D7_01_v3	474150	C		412		274	293	125	407	496	154	0.541671	0.256875	0.675522	0.303246	rna_PF3D7_0112300-1	rna_PF3D7_0112300-1	Pf3D7_01_v3	473739	475887	PF3D7_0112300-1	18S+ribosomal+RNA	PF3D7_0112300-1	2149	PF3D7_0112300
Pf3D7_01_v3	474151	A		413		158	49	88	220	71	102	1.80505	1.04788	2.46056	1.35789	rna_PF3D7_0112300-1	rna_PF3D7_0112300-1	Pf3D7_01_v3	473739	475887	PF3D7_0112300-1	18S+ribosomal+RNA	PF3D7_0112300-1	2149	PF3D7_0112300
Pf3D7_01_v3	474152	C		414		251	194	219	353	399	324	0.74695	0.665387	0.728236	0.780852	rna_PF3D7_0112300-1	rna_PF3D7_0112300-1	Pf3D7_01_v3	473739	475887	PF3D7_0112300-1	18S+ribosomal+RNA	PF3D7_0112300-1	2149	PF3D7_0112300
Pf3D7_01_v3	474153	A		415		271	210	337	383	328	487	0.744776	0.939677	0.958135	1.41881	rna_PF3D7_0112300-1	rna_PF3D7_0112300-1	Pf3D7_01_v3	473739	475887	PF3D7_0112300-1	18S+ribosomal+RNA	PF3D7_0112300-1	2149	PF3D7_0112300
Pf3D7_01_v3	474154	T		416		183	107	198	268	182	225	0.982892	1.08044	1.20326	1.18161	rna_PF3D7_0112300-1	rna_PF3D7_0112300-1	Pf3D7_01_v3	473739	475887	PF3D7_0112300-1	18S+ribosomal+RNA	PF3D7_0112300-1	2149	PF3D7_0112300
Pf3D7_01_v3	474155	C		417		45	30	22	98	43	53	0.873731	0.478918	1.79649	1.16676	rna_PF3D7_0112300-1	rna_PF3D7_0112300-1	Pf3D7_01_v3	473739	475887	PF3D7_0112300-1	18S+ribosomal+RNA	PF3D7_0112300-1	2149	PF3D7_0112300
Pf3D7_01_v3	474156	T		418		238	139	269	308	273	304	0.983886	1.12953	0.926317	1.06688	rna_PF3D7_0112300-1	rna_PF3D7_0112300-1	Pf3D7_01_v3	473739	475887	PF3D7_0112300-1	18S+ribosomal+RNA	PF3D7_0112300-1	2149	PF3D7_0112300
Pf3D7_01_v3	474157	A		419		246	131	307	308	232	342	1.07701	1.36309	1.0873	1.40676	rna_PF3D7_0112300-1	rna_PF3D7_0112300-1	Pf3D7_01_v3	473739	475887	PF3D7_0112300-1	18S+ribosomal+RNA	PF3D7_0112300-1	2149	PF3D7_0112300
Pf3D7_01_v3	474158	A		420		148	43	159	200	84	180	1.91592	2.09046	1.91018	2.00787	rna_PF3D7_0112300-1	rna_PF3D7_0112300-1	Pf3D7_01_v3	473739	475887	PF3D7_0112300-1	18S+ribosomal+RNA	PF3D7_0112300-1	2149	PF3D7_0112300
Pf3D7_01_v3	474159	G		421		126	11	97	183	13	95	5.42455	4.2979	9.10172	5.61587	rna_PF3D7_0112300-1	rna_PF3D7_0112300-1	Pf3D7_01_v3	473739	475887	PF3D7_0112300-1	18S+ribosomal+RNA	PF3D7_0112300-1	2149	PF3D7_0112300
Pf3D7_01_v3	474160	G		422		198	32	159	249	59	189	3.3439	2.74987	3.30783	2.94282	rna_PF3D7_0112300-1	rna_PF3D7_0112300-1	Pf3D7_01_v3	473739	475887	PF3D7_0112300-1	18S+ribosomal+RNA	PF3D7_0112300-1	2149	PF3D7_0112300
Pf3D7_01_v3	474161	A		423		140	22	135	219	57	156	3.34881	3.29094	3.01256	2.51997	rna_PF3D7_0112300-1	rna_PF3D7_0112300-1	Pf3D7_01_v3	473739	475887	PF3D7_0112300-1	18S+ribosomal+RNA	PF3D7_0112300-1	2149	PF3D7_0112300
Pf3D7_01_v3	474162	A		424		75	10	68	101	17	107	3.57005	3.31374	4.14683	5.09216	rna_PF3D7_0112300-1	rna_PF3D7_0112300-1	Pf3D7_01_v3	473739	475887	PF3D7_0112300-1	18S+ribosomal+RNA	PF3D7_0112300-1	2149	PF3D7_0112300
Pf3D7_01_v3	474163	G		425		74	9	34	110	16	29	3.82238	1.91739	4.72554	1.59285	rna_PF3D7_0112300-1	rna_PF3D7_0112300-1	Pf3D7_01_v3	473739	475887	PF3D7_0112300-1	18S+ribosomal+RNA	PF3D7_0112300-1	2149	PF3D7_0112300
Pf3D7_01_v3	474164	G		426		49	9	18	65	20	19	2.61277	1.12894	2.39245	0.92559	rna_PF3D7_0112300-1	rna_PF3D7_0112300-1	Pf3D7_01_v3	473739	475887	PF3D7_0112300-1	18S+ribosomal+RNA	PF3D7_0112300-1	2149	PF3D7_0112300
Pf3D7_01_v3	474165	C		427		32	10	16	48	26	7	1.65115	0.950331	1.44671	0.35537	rna_PF3D7_0112300-1	rna_PF3D7_0112300-1	Pf3D7_01_v3	473739	475887	PF3D7_0112300-1	18S+ribosomal+RNA	PF3D7_0112300-1	2149	PF3D7_0112300
Pf3D7_01_v3	474166	A		428		13	7	2	31	9	9	1.04736	0.409458	2.27118	0.971407	rna_PF3D7_0112300-1	rna_PF3D7_0112300-1	Pf3D7_01_v3	473739	475887	PF3D7_0112300-1	18S+ribosomal+RNA	PF3D7_0112300-1	2149	PF3D7_0112300
Pf3D7_01_v3	474167	G		429		2	2	0	0	5	0	0.825304	0.589503	0.439462	0.439462	rna_PF3D7_0112300-1	rna_PF3D7_0112300-1	Pf3D7_01_v3	473739	475887	PF3D7_0112300-1	18S+ribosomal+RNA	PF3D7_0112300-1	2149	PF3D7_0112300
Pf3D7_01_v3	474168	C		430		0	0	1	4	2	2	1	1.2037	1.21629	0.986133	rna_PF3D7_0112300-1	rna_PF3D7_0112300-1	Pf3D7_01_v3	473739	475887	PF3D7_0112300-1	18S+ribosomal+RNA	PF3D7_0112300-1	2149	PF3D7_0112300
Pf3D7_01_v3	474169	A		431		0	0	1	0	1	0	1	1.2037	0.796748	0.796748	rna_PF3D7_0112300-1	rna_PF3D7_0112300-1	Pf3D7_01_v3	473739	475887	PF3D7_0112300-1	18S+ribosomal+RNA	PF3D7_0112300-1	2149	PF3D7_0112300
Pf3D7_01_v3	474170	G		432		0	0	0	0	0	2	1	1	1	1.48926	rna_PF3D7_0112300-1	rna_PF3D7_0112300-1	Pf3D7_01_v3	473739	475887	PF3D7_0112300-1	18S+ribosomal+RNA	PF3D7_0112300-1	2149	PF3D7_0112300
Pf3D7_01_v3	474171	G		433		0	0	0	1	0	0	1	1	1.20921	1	rna_PF3D7_0112300-1	rna_PF3D7_0112300-1	Pf3D7_01_v3	473739	475887	PF3D7_0112300-1	18S+ribosomal+RNA	PF3D7_0112300-1	2149	PF3D7_0112300
Pf3D7_01_v3	474172	C		434		0	0	0	2	2	0	1	1	0.939228	0.662162	rna_PF3D7_0112300-1	rna_PF3D7_0112300-1	Pf3D7_01_v3	473739	475887	PF3D7_0112300-1	18S+ribosomal+RNA	PF3D7_0112300-1	2149	PF3D7_0112300
Pf3D7_01_v3	474173	G		435		0	0	1	3	1	0	1	1.2037	1.29682	0.796748	rna_PF3D7_0112300-1	rna_PF3D7_0112300-1	Pf3D7_01_v3	473739	475887	PF3D7_0112300-1	18S+ribosomal+RNA	PF3D7_0112300-1	2149	PF3D7_0112300
Pf3D7_01_v3	474174	C		436		0	0	0	2	3	2	1	1	0.803502	0.843628	rna_PF3D7_0112300-1	rna_PF3D7_0112300-1	Pf3D7_01_v3	473739	475887	PF3D7_0112300-1	18S+ribosomal+RNA	PF3D7_0112300-1	2149	PF3D7_0112300
Pf3D7_01_v3	474175	G		437		1	0	3	8	1	9	1.2	1.61109	2.13027	2.55093	rna_PF3D7_0112300-1	rna_PF3D7_0112300-1	Pf3D7_01_v3	473739	475887	PF3D7_0112300-1	18S+ribosomal+RNA	PF3D7_0112300-1	2149	PF3D7_0112300
Pf3D7_01_v3	474176	T		438		4	1	1	9	5	21	1.33514	0.892835	1.26693	2.69709	rna_PF3D7_0112300-1	rna_PF3D7_0112300-1	Pf3D7_01_v3	473739	475887	PF3D7_0112300-1	18S+ribosomal+RNA	PF3D7_0112300-1	2149	PF3D7_0112300
Pf3D7_01_v3	474177	A		439		34	0	35	67	0	57	7.8	8.12933	15.0173	14.9439	rna_PF3D7_0112300-1	rna_PF3D7_0112300-1	Pf3D7_01_v3	473739	475887	PF3D7_0112300-1	18S+ribosomal+RNA	PF3D7_0112300-1	2149	PF3D7_0112300
Pf3D7_01_v3	474178	A		440		6	0	10	23	11	23	2.2	3.03695	1.52699	1.74101	rna_PF3D7_0112300-1	rna_PF3D7_0112300-1	Pf3D7_01_v3	473739	475887	PF3D7_0112300-1	18S+ribosomal+RNA	PF3D7_0112300-1	2149	PF3D7_0112300
Pf3D7_01_v3	474179	A		441		5	2	5	18	7	13	1.17901	1.1899	1.71081	1.50058	rna_PF3D7_0112300-1	rna_PF3D7_0112300-1	Pf3D7_01_v3	473739	475887	PF3D7_0112300-1	18S+ribosomal+RNA	PF3D7_0112300-1	2149	PF3D7_0112300
Pf3D7_01_v3	474180	T		442		2	0	0	13	1	10	1.4	1	2.96372	2.74584	rna_PF3D7_0112300-1	rna_PF3D7_0112300-1	Pf3D7_01_v3	473739	475887	PF3D7_0112300-1	18S+ribosomal+RNA	PF3D7_0112300-1	2149	PF3D7_0112300
Pf3D7_01_v3	474181	T		443		1	0	1	13	4	9	1.2	1.2037	1.8411	1.58467	rna_PF3D7_0112300-1	rna_PF3D7_0112300-1	Pf3D7_01_v3	473739	475887	PF3D7_0112300-1	18S+ribosomal+RNA	PF3D7_0112300-1	2149	PF3D7_0112300
Pf3D7_01_v3	474182	A		444		4	0	1	3	1	9	1.8	1.2037	1.29682	2.55093	rna_PF3D7_0112300-1	rna_PF3D7_0112300-1	Pf3D7_01_v3	473739	475887	PF3D7_0112300-1	18S+ribosomal+RNA	PF3D7_0112300-1	2149	PF3D7_0112300
Pf3D7_01_v3	474183	C		445		0	0	0	3	4	1	1	1	0.805599	0.61603	rna_PF3D7_0112300-1	rna_PF3D7_0112300-1	Pf3D7_01_v3	473739	475887	PF3D7_0112300-1	18S+ribosomal+RNA	PF3D7_0112300-1	2149	PF3D7_0112300
Pf3D7_01_v3	474184	C		446		0	0	0	1	2	2	1	1	0.800695	0.986133	rna_PF3D7_0112300-1	rna_PF3D7_0112300-1	Pf3D7_01_v3	473739	475887	PF3D7_0112300-1	18S+ribosomal+RNA	PF3D7_0112300-1	2149	PF3D7_0112300
Pf3D7_01_v3	474185	C		447		2	1	0	3	4	7	1.03844	0.741745	0.805599	1.34251	rna_PF3D7_0112300-1	rna_PF3D7_0112300-1	Pf3D7_01_v3	473739	475887	PF3D7_0112300-1	18S+ribosomal+RNA	PF3D7_0112300-1	2149	PF3D7_0112300
Pf3D7_01_v3	474186	A		448		1	0	0	12	5	13	1.2	1	1.54276	1.83704	rna_PF3D7_0112300-1	rna_PF3D7_0112300-1	Pf3D7_01_v3	473739	475887	PF3D7_0112300-1	18S+ribosomal+RNA	PF3D7_0112300-1	2149	PF3D7_0112300
Pf3D7_01_v3	474187	A		449		0	1	0	9	9	5	0.741745	0.741745	0.874694	0.674517	rna_PF3D7_0112300-1	rna_PF3D7_0112300-1	Pf3D7_01_v3	473739	475887	PF3D7_0112300-1	18S+ribosomal+RNA	PF3D7_0112300-1	2149	PF3D7_0112300
Pf3D7_01_v3	474188	T		450		0	3	0	13	5	12	0.489113	0.489113	1.6347	1.72953	rna_PF3D7_0112300-1	rna_PF3D7_0112300-1	Pf3D7_01_v3	473739	475887	PF3D7_0112300-1	18S+ribosomal+RNA	PF3D7_0112300-1	2149	PF3D7_0112300
Pf3D7_01_v3	474189	T		451		1	0	2	7	2	6	1.2	1.40739	1.63189	1.63407	rna_PF3D7_0112300-1	rna_PF3D7_0112300-1	Pf3D7_01_v3	473739	475887	PF3D7_0112300-1	18S+ribosomal+RNA	PF3D7_0112300-1	2149	PF3D7_0112300
Pf3D7_01_v3	474190	C		452		3	1	4	11	8	18	1.18679	1.3461	1.08568	1.77694	rna_PF3D7_0112300-1	rna_PF3D7_0112300-1	Pf3D7_01_v3	473739	475887	PF3D7_0112300-1	18S+ribosomal+RNA	PF3D7_0112300-1	2149	PF3D7_0112300
Pf3D7_01_v3	474191	T		453		1	2	3	13	10	22	0.707403	0.949739	1.04752	1.7972	rna_PF3D7_0112300-1	rna_PF3D7_0112300-1	Pf3D7_01_v3	473739	475887	PF3D7_0112300-1	18S+ribosomal+RNA	PF3D7_0112300-1	2149	PF3D7_0112300
Pf3D7_01_v3	474192	A		454		0	0	1	8	13	13	1	1.2037	0.61944	0.968463	rna_PF3D7_0112300-1	rna_PF3D7_0112300-1	Pf3D7_01_v3	473739	475887	PF3D7_0112300-1	18S+ribosomal+RNA	PF3D7_0112300-1	2149	PF3D7_0112300
Pf3D7_01_v3	474193	A		455		0	0	3	9	11	7	1	1.61109	0.757443	0.712646	rna_PF3D7_0112300-1	rna_PF3D7_0112300-1	Pf3D7_01_v3	473739	475887	PF3D7_0112300-1	18S+ribosomal+RNA	PF3D7_0112300-1	2149	PF3D7_0112300
Pf3D7_01_v3	474194	A		456		6	7	4	16	19	13	0.640055	0.527981	0.743536	0.714938	rna_PF3D7_0112300-1	rna_PF3D7_0112300-1	Pf3D7_01_v3	473739	475887	PF3D7_0112300-1	18S+ribosomal+RNA	PF3D7_0112300-1	2149	PF3D7_0112300
Pf3D7_01_v3	474195	A		457		26	4	37	32	26	34	2.59123	3.56784	1.00815	1.22074	rna_PF3D7_0112300-1	rna_PF3D7_0112300-1	Pf3D7_01_v3	473739	475887	PF3D7_0112300-1	18S+ribosomal+RNA	PF3D7_0112300-1	2149	PF3D7_0112300
Pf3D7_01_v3	474196	A		458		8	0	10	17	12	17	2.6	3.03695	1.12198	1.27024	rna_PF3D7_0112300-1	rna_PF3D7_0112300-1	Pf3D7_01_v3	473739	475887	PF3D7_0112300-1	18S+ribosomal+RNA	PF3D7_0112300-1	2149	PF3D7_0112300
Pf3D7_01_v3	474197	A		459		0	0	0	4	4	3	1	1	0.909149	0.858189	rna_PF3D7_0112300-1	rna_PF3D7_0112300-1	Pf3D7_01_v3	473739	475887	PF3D7_0112300-1	18S+ribosomal+RNA	PF3D7_0112300-1	2149	PF3D7_0112300
Pf3D7_01_v3	474198	G		460		0	1	4	3	2	7	0.741745	1.3461	1.07776	1.79606	rna_PF3D7_0112300-1	rna_PF3D7_0112300-1	Pf3D7_01_v3	473739	475887	PF3D7_0112300-1	18S+ribosomal+RNA	PF3D7_0112300-1	2149	PF3D7_0112300
Pf3D7_01_v3	474199	A		461		0	0	0	1	0	2	1	1	1.20921	1.48926	rna_PF3D7_0112300-1	rna_PF3D7_0112300-1	Pf3D7_01_v3	473739	475887	PF3D7_0112300-1	18S+ribosomal+RNA	PF3D7_0112300-1	2149	PF3D7_0112300
Pf3D7_01_v3	474200	G		462		4	1	1	3	0	5	1.33514	0.892835	1.62764	2.22315	rna_PF3D7_0112300-1	rna_PF3D7_0112300-1	Pf3D7_01_v3	473739	475887	PF3D7_0112300-1	18S+ribosomal+RNA	PF3D7_0112300-1	2149	PF3D7_0112300
Pf3D7_01_v3	474201	A		463		0	0	0	1	1	1	1	1	0.963438	0.991657	rna_PF3D7_0112300-1	rna_PF3D7_0112300-1	Pf3D7_01_v3	473739	475887	PF3D7_0112300-1	18S+ribosomal+RNA	PF3D7_0112300-1	2149	PF3D7_0112300
Pf3D7_01_v3	474202	G		464		0	0	0	1	0	4	1	1	1.20921	1.97852	rna_PF3D7_0112300-1	rna_PF3D7_0112300-1	Pf3D7_01_v3	473739	475887	PF3D7_0112300-1	18S+ribosomal+RNA	PF3D7_0112300-1	2149	PF3D7_0112300
Pf3D7_01_v3	474203	G		465		0	0	0	10	8	4	1	1	1.01688	0.650655	rna_PF3D7_0112300-1	rna_PF3D7_0112300-1	Pf3D7_01_v3	473739	475887	PF3D7_0112300-1	18S+ribosomal+RNA	PF3D7_0112300-1	2149	PF3D7_0112300
Pf3D7_01_v3	474204	T		466		0	1	0	1	1	1	0.741745	0.741745	0.963438	0.991657	rna_PF3D7_0112300-1	rna_PF3D7_0112300-1	Pf3D7_01_v3	473739	475887	PF3D7_0112300-1	18S+ribosomal+RNA	PF3D7_0112300-1	2149	PF3D7_0112300
Pf3D7_01_v3	474205	A		467		0	0	0	3	1	6	1	1	1.29682	1.9662	rna_PF3D7_0112300-1	rna_PF3D7_0112300-1	Pf3D7_01_v3	473739	475887	PF3D7_0112300-1	18S+ribosomal+RNA	PF3D7_0112300-1	2149	PF3D7_0112300
Pf3D7_01_v3	474206	G		468		0	0	0	2	1	3	1	1	1.13013	1.38148	rna_PF3D7_0112300-1	rna_PF3D7_0112300-1	Pf3D7_01_v3	473739	475887	PF3D7_0112300-1	18S+ribosomal+RNA	PF3D7_0112300-1	2149	PF3D7_0112300
Pf3D7_01_v3	474207	T		469		0	0	0	0	1	5	1	1	0.796748	1.77129	rna_PF3D7_0112300-1	rna_PF3D7_0112300-1	Pf3D7_01_v3	473739	475887	PF3D7_0112300-1	18S+ribosomal+RNA	PF3D7_0112300-1	2149	PF3D7_0112300
Pf3D7_01_v3	474208	G		470		0	0	0	3	5	17	1	1	0.715286	2.26706	rna_PF3D7_0112300-1	rna_PF3D7_0112300-1	Pf3D7_01_v3	473739	475887	PF3D7_0112300-1	18S+ribosomal+RNA	PF3D7_0112300-1	2149	PF3D7_0112300
Pf3D7_01_v3	474209	A		471		2	0	4	3	2	7	1.4	1.81478	1.07776	1.79606	rna_PF3D7_0112300-1	rna_PF3D7_0112300-1	Pf3D7_01_v3	473739	475887	PF3D7_0112300-1	18S+ribosomal+RNA	PF3D7_0112300-1	2149	PF3D7_0112300
Pf3D7_01_v3	474210	C		472		0	1	0	2	3	10	0.741745	0.741745	0.803502	1.95224	rna_PF3D7_0112300-1	rna_PF3D7_0112300-1	Pf3D7_01_v3	473739	475887	PF3D7_0112300-1	18S+ribosomal+RNA	PF3D7_0112300-1	2149	PF3D7_0112300
Pf3D7_01_v3	474211	A		473		1	0	0	5	3	9	1.2	1	1.15904	1.81367	rna_PF3D7_0112300-1	rna_PF3D7_0112300-1	Pf3D7_01_v3	473739	475887	PF3D7_0112300-1	18S+ribosomal+RNA	PF3D7_0112300-1	2149	PF3D7_0112300
Pf3D7_01_v3	474212	A		474		0	0	0	6	1	5	1	1	1.79689	1.77129	rna_PF3D7_0112300-1	rna_PF3D7_0112300-1	Pf3D7_01_v3	473739	475887	PF3D7_0112300-1	18S+ribosomal+RNA	PF3D7_0112300-1	2149	PF3D7_0112300
Pf3D7_01_v3	474213	G		475		0	0	0	9	9	10	1	1	0.874694	1.04563	rna_PF3D7_0112300-1	rna_PF3D7_0112300-1	Pf3D7_01_v3	473739	475887	PF3D7_0112300-1	18S+ribosomal+RNA	PF3D7_0112300-1	2149	PF3D7_0112300
Pf3D7_01_v3	474214	A		476		2	0	0	1	1	4	1.4	1	0.963438	1.57638	rna_PF3D7_0112300-1	rna_PF3D7_0112300-1	Pf3D7_01_v3	473739	475887	PF3D7_0112300-1	18S+ribosomal+RNA	PF3D7_0112300-1	2149	PF3D7_0112300
Pf3D7_01_v3	474215	A		477		0	1	1	2	11	17	0.741745	0.892835	0.37267	1.35538	rna_PF3D7_0112300-1	rna_PF3D7_0112300-1	Pf3D7_01_v3	473739	475887	PF3D7_0112300-1	18S+ribosomal+RNA	PF3D7_0112300-1	2149	PF3D7_0112300
Pf3D7_01_v3	474216	A		478		0	0	1	5	3	13	1	1.2037	1.15904	2.36797	rna_PF3D7_0112300-1	rna_PF3D7_0112300-1	Pf3D7_01_v3	473739	475887	PF3D7_0112300-1	18S+ribosomal+RNA	PF3D7_0112300-1	2149	PF3D7_0112300
Pf3D7_01_v3	474217	T		479		0	0	1	7	3	10	1	1.2037	1.39607	1.95224	rna_PF3D7_0112300-1	rna_PF3D7_0112300-1	Pf3D7_01_v3	473739	475887	PF3D7_0112300-1	18S+ribosomal+RNA	PF3D7_0112300-1	2149	PF3D7_0112300
Pf3D7_01_v3	474218	A		480		0	0	0	11	7	13	1	1	1.1851	1.50058	rna_PF3D7_0112300-1	rna_PF3D7_0112300-1	Pf3D7_01_v3	473739	475887	PF3D7_0112300-1	18S+ribosomal+RNA	PF3D7_0112300-1	2149	PF3D7_0112300
Pf3D7_01_v3	474219	A		481		0	1	0	4	3	4	0.741745	0.741745	1.04053	1.12078	rna_PF3D7_0112300-1	rna_PF3D7_0112300-1	Pf3D7_01_v3	473739	475887	PF3D7_0112300-1	18S+ribosomal+RNA	PF3D7_0112300-1	2149	PF3D7_0112300
Pf3D7_01_v3	474220	C		482		0	2	0	1	0	2	0.589503	0.589503	1.20921	1.48926	rna_PF3D7_0112300-1	rna_PF3D7_0112300-1	Pf3D7_01_v3	473739	475887	PF3D7_0112300-1	18S+ribosomal+RNA	PF3D7_0112300-1	2149	PF3D7_0112300
Pf3D7_01_v3	474221	A		483		0	2	0	2	1	1	0.589503	0.589503	1.13013	0.991657	rna_PF3D7_0112300-1	rna_PF3D7_0112300-1	Pf3D7_01_v3	473739	475887	PF3D7_0112300-1	18S+ribosomal+RNA	PF3D7_0112300-1	2149	PF3D7_0112300
Pf3D7_01_v3	474222	A		484		2	0	0	5	2	4	1.4	1	1.35483	1.3101	rna_PF3D7_0112300-1	rna_PF3D7_0112300-1	Pf3D7_01_v3	473739	475887	PF3D7_0112300-1	18S+ribosomal+RNA	PF3D7_0112300-1	2149	PF3D7_0112300
Pf3D7_01_v3	474223	T		485		2	1	1	12	10	4	1.03844	0.892835	0.988606	0.55717	rna_PF3D7_0112300-1	rna_PF3D7_0112300-1	Pf3D7_01_v3	473739	475887	PF3D7_0112300-1	18S+ribosomal+RNA	PF3D7_0112300-1	2149	PF3D7_0112300
Pf3D7_01_v3	474224	A		486		0	0	0	5	4	0	1	1	1.0127	0.49495	rna_PF3D7_0112300-1	rna_PF3D7_0112300-1	Pf3D7_01_v3	473739	475887	PF3D7_0112300-1	18S+ribosomal+RNA	PF3D7_0112300-1	2149	PF3D7_0112300
Pf3D7_01_v3	474225	C		487		0	0	1	3	3	1	1	1.2037	0.922016	0.705051	rna_PF3D7_0112300-1	rna_PF3D7_0112300-1	Pf3D7_01_v3	473739	475887	PF3D7_0112300-1	18S+ribosomal+RNA	PF3D7_0112300-1	2149	PF3D7_0112300
Pf3D7_01_v3	474226	A		488		0	0	0	3	7	2	1	1	0.584281	0.534607	rna_PF3D7_0112300-1	rna_PF3D7_0112300-1	Pf3D7_01_v3	473739	475887	PF3D7_0112300-1	18S+ribosomal+RNA	PF3D7_0112300-1	2149	PF3D7_0112300
Pf3D7_01_v3	474227	A		489		2	0	0	14	1	1	1.4	1	3.13041	0.991657	rna_PF3D7_0112300-1	rna_PF3D7_0112300-1	Pf3D7_01_v3	473739	475887	PF3D7_0112300-1	18S+ribosomal+RNA	PF3D7_0112300-1	2149	PF3D7_0112300
Pf3D7_01_v3	474228	T		490		2	0	0	5	3	1	1.4	1	1.15904	0.705051	rna_PF3D7_0112300-1	rna_PF3D7_0112300-1	Pf3D7_01_v3	473739	475887	PF3D7_0112300-1	18S+ribosomal+RNA	PF3D7_0112300-1	2149	PF3D7_0112300
Pf3D7_01_v3	474229	A		491		0	0	0	10	5	1	1	1	1.35887	0.546968	rna_PF3D7_0112300-1	rna_PF3D7_0112300-1	Pf3D7_01_v3	473739	475887	PF3D7_0112300-1	18S+ribosomal+RNA	PF3D7_0112300-1	2149	PF3D7_0112300
Pf3D7_01_v3	474230	T		492		0	0	1	6	1	1	1	1.2037	1.79689	0.991657	rna_PF3D7_0112300-1	rna_PF3D7_0112300-1	Pf3D7_01_v3	473739	475887	PF3D7_0112300-1	18S+ribosomal+RNA	PF3D7_0112300-1	2149	PF3D7_0112300
Pf3D7_01_v3	474231	C		493		0	1	0	0	2	0	0.741745	0.741745	0.662162	0.662162	rna_PF3D7_0112300-1	rna_PF3D7_0112300-1	Pf3D7_01_v3	473739	475887	PF3D7_0112300-1	18S+ribosomal+RNA	PF3D7_0112300-1	2149	PF3D7_0112300
Pf3D7_01_v3	474232	G		494		0	0	1	5	4	9	1	1.2037	1.0127	1.58467	rna_PF3D7_0112300-1	rna_PF3D7_0112300-1	Pf3D7_01_v3	473739	475887	PF3D7_0112300-1	18S+ribosomal+RNA	PF3D7_0112300-1	2149	PF3D7_0112300
Pf3D7_01_v3	474233	A		495		0	0	1	4	8	7	1	1.2037	0.604066	0.892003	rna_PF3D7_0112300-1	rna_PF3D7_0112300-1	Pf3D7_01_v3	473739	475887	PF3D7_0112300-1	18S+ribosomal+RNA	PF3D7_0112300-1	2149	PF3D7_0112300
Pf3D7_01_v3	474234	A		496		0	1	0	0	9	15	0.741745	0.741745	0.303406	1.41674	rna_PF3D7_0112300-1	rna_PF3D7_0112300-1	Pf3D7_01_v3	473739	475887	PF3D7_0112300-1	18S+ribosomal+RNA	PF3D7_0112300-1	2149	PF3D7_0112300
Pf3D7_01_v3	474235	A		497		3	0	0	4	2	18	1.6	1	1.21629	3.5779	rna_PF3D7_0112300-1	rna_PF3D7_0112300-1	Pf3D7_01_v3	473739	475887	PF3D7_0112300-1	18S+ribosomal+RNA	PF3D7_0112300-1	2149	PF3D7_0112300
Pf3D7_01_v3	474236	A		498		1	0	2	8	4	22	1.2	1.40739	1.32335	3.15871	rna_PF3D7_0112300-1	rna_PF3D7_0112300-1	Pf3D7_01_v3	473739	475887	PF3D7_0112300-1	18S+ribosomal+RNA	PF3D7_0112300-1	2149	PF3D7_0112300
Pf3D7_01_v3	474237	A		499		0	0	0	1	2	6	1	1	0.800695	1.63407	rna_PF3D7_0112300-1	rna_PF3D7_0112300-1	Pf3D7_01_v3	473739	475887	PF3D7_0112300-1	18S+ribosomal+RNA	PF3D7_0112300-1	2149	PF3D7_0112300
Pf3D7_01_v3	474238	T		500		0	0	0	7	0	4	1	1	2.46449	1.97852	rna_PF3D7_0112300-1	rna_PF3D7_0112300-1	Pf3D7_01_v3	473739	475887	PF3D7_0112300-1	18S+ribosomal+RNA	PF3D7_0112300-1	2149	PF3D7_0112300
Pf3D7_01_v3	474239	G		501		0	1	0	13	9	1	0.741745	0.741745	1.1286	0.377628	rna_PF3D7_0112300-1	rna_PF3D7_0112300-1	Pf3D7_01_v3	473739	475887	PF3D7_0112300-1	18S+ribosomal+RNA	PF3D7_0112300-1	2149	PF3D7_0112300
Pf3D7_01_v3	474240	A		502		0	0	0	10	8	0	1	1	1.01688	0.328859	rna_PF3D7_0112300-1	rna_PF3D7_0112300-1	Pf3D7_01_v3	473739	475887	PF3D7_0112300-1	18S+ribosomal+RNA	PF3D7_0112300-1	2149	PF3D7_0112300
Pf3D7_01_v3	474241	T		503		0	0	0	5	3	0	1	1	1.15904	0.566474	rna_PF3D7_0112300-1	rna_PF3D7_0112300-1	Pf3D7_01_v3	473739	475887	PF3D7_0112300-1	18S+ribosomal+RNA	PF3D7_0112300-1	2149	PF3D7_0112300
Pf3D7_01_v3	474242	T		504		0	0	0	6	4	2	1	1	1.11625	0.737109	rna_PF3D7_0112300-1	rna_PF3D7_0112300-1	Pf3D7_01_v3	473739	475887	PF3D7_0112300-1	18S+ribosomal+RNA	PF3D7_0112300-1	2149	PF3D7_0112300
Pf3D7_01_v3	474243	T		505		0	0	0	3	1	1	1	1	1.29682	0.991657	rna_PF3D7_0112300-1	rna_PF3D7_0112300-1	Pf3D7_01_v3	473739	475887	PF3D7_0112300-1	18S+ribosomal+RNA	PF3D7_0112300-1	2149	PF3D7_0112300
Pf3D7_01_v3	474244	T		506		0	0	0	5	0	2	1	1	2.04607	1.48926	rna_PF3D7_0112300-1	rna_PF3D7_0112300-1	Pf3D7_01_v3	473739	475887	PF3D7_0112300-1	18S+ribosomal+RNA	PF3D7_0112300-1	2149	PF3D7_0112300
Pf3D7_01_v3	474245	G		507		0	0	0	2	5	4	1	1	0.623344	0.869486	rna_PF3D7_0112300-1	rna_PF3D7_0112300-1	Pf3D7_01_v3	473739	475887	PF3D7_0112300-1	18S+ribosomal+RNA	PF3D7_0112300-1	2149	PF3D7_0112300
Pf3D7_01_v3	474246	T		508		0	0	0	1	6	3	1	1	0.477834	0.685167	rna_PF3D7_0112300-1	rna_PF3D7_0112300-1	Pf3D7_01_v3	473739	475887	PF3D7_0112300-1	18S+ribosomal+RNA	PF3D7_0112300-1	2149	PF3D7_0112300
Pf3D7_01_v3	474247	A		509		1	0	0	11	3	16	1.2	1	1.87013	2.78371	rna_PF3D7_0112300-1	rna_PF3D7_0112300-1	Pf3D7_01_v3	473739	475887	PF3D7_0112300-1	18S+ribosomal+RNA	PF3D7_0112300-1	2149	PF3D7_0112300
Pf3D7_01_v3	474248	A		510		1	0	0	4	6	9	1.2	1	0.725853	1.26518	rna_PF3D7_0112300-1	rna_PF3D7_0112300-1	Pf3D7_01_v3	473739	475887	PF3D7_0112300-1	18S+ribosomal+RNA	PF3D7_0112300-1	2149	PF3D7_0112300
Pf3D7_01_v3	474249	T		511		0	0	0	4	3	5	1	1	1.04053	1.25936	rna_PF3D7_0112300-1	rna_PF3D7_0112300-1	Pf3D7_01_v3	473739	475887	PF3D7_0112300-1	18S+ribosomal+RNA	PF3D7_0112300-1	2149	PF3D7_0112300
Pf3D7_01_v3	474250	T		512		0	0	1	2	2	2	1	1.2037	0.939228	0.986133	rna_PF3D7_0112300-1	rna_PF3D7_0112300-1	Pf3D7_01_v3	473739	475887	PF3D7_0112300-1	18S+ribosomal+RNA	PF3D7_0112300-1	2149	PF3D7_0112300
Pf3D7_01_v3	474251	G		513		0	0	0	2	0	8	1	1	1.41843	2.95704	rna_PF3D7_0112300-1	rna_PF3D7_0112300-1	Pf3D7_01_v3	473739	475887	PF3D7_0112300-1	18S+ribosomal+RNA	PF3D7_0112300-1	2149	PF3D7_0112300
Pf3D7_01_v3	474252	G		514		0	0	0	9	1	4	1	1	2.29696	1.57638	rna_PF3D7_0112300-1	rna_PF3D7_0112300-1	Pf3D7_01_v3	473739	475887	PF3D7_0112300-1	18S+ribosomal+RNA	PF3D7_0112300-1	2149	PF3D7_0112300
Pf3D7_01_v3	474253	A		515		0	0	2	5	10	9	1	1.40739	0.576191	0.901622	rna_PF3D7_0112300-1	rna_PF3D7_0112300-1	Pf3D7_01_v3	473739	475887	PF3D7_0112300-1	18S+ribosomal+RNA	PF3D7_0112300-1	2149	PF3D7_0112300
Pf3D7_01_v3	474254	A		516		0	0	0	1	2	11	1	1	0.800695	2.444	rna_PF3D7_0112300-1	rna_PF3D7_0112300-1	Pf3D7_01_v3	473739	475887	PF3D7_0112300-1	18S+ribosomal+RNA	PF3D7_0112300-1	2149	PF3D7_0112300
Pf3D7_01_v3	474255	T		517		0	0	1	3	2	10	1	1.2037	1.07776	2.28201	rna_PF3D7_0112300-1	rna_PF3D7_0112300-1	Pf3D7_01_v3	473739	475887	PF3D7_0112300-1	18S+ribosomal+RNA	PF3D7_0112300-1	2149	PF3D7_0112300
Pf3D7_01_v3	474256	G		518		0	0	2	4	4	21	1	1.40739	0.909149	3.03763	rna_PF3D7_0112300-1	rna_PF3D7_0112300-1	Pf3D7_01_v3	473739	475887	PF3D7_0112300-1	18S+ribosomal+RNA	PF3D7_0112300-1	2149	PF3D7_0112300
Pf3D7_01_v3	474257	A		519		0	0	2	6	14	23	1	1.40739	0.493342	1.44955	rna_PF3D7_0112300-1	rna_PF3D7_0112300-1	Pf3D7_01_v3	473739	475887	PF3D7_0112300-1	18S+ribosomal+RNA	PF3D7_0112300-1	2149	PF3D7_0112300
Pf3D7_01_v3	474258	T		520		0	0	0	6	5	8	1	1	0.991109	1.29951	rna_PF3D7_0112300-1	rna_PF3D7_0112300-1	Pf3D7_01_v3	473739	475887	PF3D7_0112300-1	18S+ribosomal+RNA	PF3D7_0112300-1	2149	PF3D7_0112300
Pf3D7_01_v3	474259	A		521		0	0	0	3	3	4	1	1	0.922016	1.12078	rna_PF3D7_0112300-1	rna_PF3D7_0112300-1	Pf3D7_01_v3	473739	475887	PF3D7_0112300-1	18S+ribosomal+RNA	PF3D7_0112300-1	2149	PF3D7_0112300
Pf3D7_01_v3	474260	G		522		0	0	0	3	0	1	1	1	1.62764	1.24463	rna_PF3D7_0112300-1	rna_PF3D7_0112300-1	Pf3D7_01_v3	473739	475887	PF3D7_0112300-1	18S+ribosomal+RNA	PF3D7_0112300-1	2149	PF3D7_0112300
Pf3D7_01_v3	474261	G		523		0	0	0	6	1	1	1	1	1.79689	0.991657	rna_PF3D7_0112300-1	rna_PF3D7_0112300-1	Pf3D7_01_v3	473739	475887	PF3D7_0112300-1	18S+ribosomal+RNA	PF3D7_0112300-1	2149	PF3D7_0112300
Pf3D7_01_v3	474262	A		524		1	1	0	15	10	0	0.890094	0.741745	1.16535	0.281609	rna_PF3D7_0112300-1	rna_PF3D7_0112300-1	Pf3D7_01_v3	473739	475887	PF3D7_0112300-1	18S+ribosomal+RNA	PF3D7_0112300-1	2149	PF3D7_0112300
Pf3D7_01_v3	474263	A		525		0	0	0	9	3	2	1	1	1.6331	0.843628	rna_PF3D7_0112300-1	rna_PF3D7_0112300-1	Pf3D7_01_v3	473739	475887	PF3D7_0112300-1	18S+ribosomal+RNA	PF3D7_0112300-1	2149	PF3D7_0112300
Pf3D7_01_v3	474264	T		526		0	0	0	7	5	1	1	1	1.08305	0.546968	rna_PF3D7_0112300-1	rna_PF3D7_0112300-1	Pf3D7_01_v3	473739	475887	PF3D7_0112300-1	18S+ribosomal+RNA	PF3D7_0112300-1	2149	PF3D7_0112300
Pf3D7_01_v3	474265	T		527		3	0	1	9	5	11	1.6	1.2037	1.26693	1.62203	rna_PF3D7_0112300-1	rna_PF3D7_0112300-1	Pf3D7_01_v3	473739	475887	PF3D7_0112300-1	18S+ribosomal+RNA	PF3D7_0112300-1	2149	PF3D7_0112300
Pf3D7_01_v3	474266	T		528		0	1	4	11	17	32	0.741745	1.3461	0.618608	1.65423	rna_PF3D7_0112300-1	rna_PF3D7_0112300-1	Pf3D7_01_v3	473739	475887	PF3D7_0112300-1	18S+ribosomal+RNA	PF3D7_0112300-1	2149	PF3D7_0112300
Pf3D7_01_v3	474267	A		529		0	0	1	7	6	3	1	1.2037	0.973872	0.685167	rna_PF3D7_0112300-1	rna_PF3D7_0112300-1	Pf3D7_01_v3	473739	475887	PF3D7_0112300-1	18S+ribosomal+RNA	PF3D7_0112300-1	2149	PF3D7_0112300
Pf3D7_01_v3	474268	C		530		1	0	2	7	5	17	1.2	1.40739	1.08305	2.26706	rna_PF3D7_0112300-1	rna_PF3D7_0112300-1	Pf3D7_01_v3	473739	475887	PF3D7_0112300-1	18S+ribosomal+RNA	PF3D7_0112300-1	2149	PF3D7_0112300
Pf3D7_01_v3	474269	A		531		0	1	1	7	9	10	0.741745	0.892835	0.747741	1.04563	rna_PF3D7_0112300-1	rna_PF3D7_0112300-1	Pf3D7_01_v3	473739	475887	PF3D7_0112300-1	18S+ribosomal+RNA	PF3D7_0112300-1	2149	PF3D7_0112300
Pf3D7_01_v3	474270	A		532		0	0	0	2	0	1	1	1	1.41843	1.24463	rna_PF3D7_0112300-1	rna_PF3D7_0112300-1	Pf3D7_01_v3	473739	475887	PF3D7_0112300-1	18S+ribosomal+RNA	PF3D7_0112300-1	2149	PF3D7_0112300
Pf3D7_01_v3	474271	G		533		0	0	0	2	0	3	1	1	1.41843	1.73389	rna_PF3D7_0112300-1	rna_PF3D7_0112300-1	Pf3D7_01_v3	473739	475887	PF3D7_0112300-1	18S+ribosomal+RNA	PF3D7_0112300-1	2149	PF3D7_0112300
Pf3D7_01_v3	474272	G		534		0	0	1	0	0	0	1	1.2037	1	1	rna_PF3D7_0112300-1	rna_PF3D7_0112300-1	Pf3D7_01_v3	473739	475887	PF3D7_0112300-1	18S+ribosomal+RNA	PF3D7_0112300-1	2149	PF3D7_0112300
Pf3D7_01_v3	474273	T		535		0	2	0	6	7	1	0.589503	0.589503	0.809587	0.446791	rna_PF3D7_0112300-1	rna_PF3D7_0112300-1	Pf3D7_01_v3	473739	475887	PF3D7_0112300-1	18S+ribosomal+RNA	PF3D7_0112300-1	2149	PF3D7_0112300
Pf3D7_01_v3	474274	T		536		0	0	0	1	0	1	1	1	1.20921	1.24463	rna_PF3D7_0112300-1	rna_PF3D7_0112300-1	Pf3D7_01_v3	473739	475887	PF3D7_0112300-1	18S+ribosomal+RNA	PF3D7_0112300-1	2149	PF3D7_0112300
Pf3D7_01_v3	474275	C		537		0	1	0	1	3	0	0.741745	0.741745	0.684988	0.566474	rna_PF3D7_0112300-1	rna_PF3D7_0112300-1	Pf3D7_01_v3	473739	475887	PF3D7_0112300-1	18S+ribosomal+RNA	PF3D7_0112300-1	2149	PF3D7_0112300
Pf3D7_01_v3	474276	C		538		0	0	0	4	6	0	1	1	0.725853	0.395162	rna_PF3D7_0112300-1	rna_PF3D7_0112300-1	Pf3D7_01_v3	473739	475887	PF3D7_0112300-1	18S+ribosomal+RNA	PF3D7_0112300-1	2149	PF3D7_0112300
Pf3D7_01_v3	474277	T		539		0	0	0	6	2	1	1	1	1.49336	0.824148	rna_PF3D7_0112300-1	rna_PF3D7_0112300-1	Pf3D7_01_v3	473739	475887	PF3D7_0112300-1	18S+ribosomal+RNA	PF3D7_0112300-1	2149	PF3D7_0112300
Pf3D7_01_v3	474278	A		540		4	0	0	4	3	0	1.8	1	1.04053	0.566474	rna_PF3D7_0112300-1	rna_PF3D7_0112300-1	Pf3D7_01_v3	473739	475887	PF3D7_0112300-1	18S+ribosomal+RNA	PF3D7_0112300-1	2149	PF3D7_0112300
Pf3D7_01_v3	474279	G		541		0	0	1	3	8	5	1	1.2037	0.535264	0.731104	rna_PF3D7_0112300-1	rna_PF3D7_0112300-1	Pf3D7_01_v3	473739	475887	PF3D7_0112300-1	18S+ribosomal+RNA	PF3D7_0112300-1	2149	PF3D7_0112300
Pf3D7_01_v3	474280	A		542		0	0	0	0	2	2	1	1	0.662162	0.986133	rna_PF3D7_0112300-1	rna_PF3D7_0112300-1	Pf3D7_01_v3	473739	475887	PF3D7_0112300-1	18S+ribosomal+RNA	PF3D7_0112300-1	2149	PF3D7_0112300
Pf3D7_01_v3	474281	G		543		14	99	34	24	131	48	0.107136	0.223452	0.174939	0.370217	rna_PF3D7_0112300-1	rna_PF3D7_0112300-1	Pf3D7_01_v3	473739	475887	PF3D7_0112300-1	18S+ribosomal+RNA	PF3D7_0112300-1	2149	PF3D7_0112300
Pf3D7_01_v3	474282	A		544		197	233	362	331	311	506	0.491938	0.910057	0.874439	1.55325	rna_PF3D7_0112300-1	rna_PF3D7_0112300-1	Pf3D7_01_v3	473739	475887	PF3D7_0112300-1	18S+ribosomal+RNA	PF3D7_0112300-1	2149	PF3D7_0112300
Pf3D7_01_v3	474283	A		545		267	307	362	353	409	457	0.504222	0.692728	0.7106	1.07082	rna_PF3D7_0112300-1	rna_PF3D7_0112300-1	Pf3D7_01_v3	473739	475887	PF3D7_0112300-1	18S+ribosomal+RNA	PF3D7_0112300-1	2149	PF3D7_0112300
Pf3D7_01_v3	474284	A		546		165	252	153	229	321	245	0.383144	0.36247	0.590073	0.735145	rna_PF3D7_0112300-1	rna_PF3D7_0112300-1	Pf3D7_01_v3	473739	475887	PF3D7_0112300-1	18S+ribosomal+RNA	PF3D7_0112300-1	2149	PF3D7_0112300
Pf3D7_01_v3	474285	C		547		139	169	142	205	217	226	0.481274	0.500069	0.77876	0.998748	rna_PF3D7_0112300-1	rna_PF3D7_0112300-1	Pf3D7_01_v3	473739	475887	PF3D7_0112300-1	18S+ribosomal+RNA	PF3D7_0112300-1	2149	PF3D7_0112300
Pf3D7_01_v3	474286	A		548		157	196	233	316	264	268	0.467926	0.699881	0.981922	0.97387	rna_PF3D7_0112300-1	rna_PF3D7_0112300-1	Pf3D7_01_v3	473739	475887	PF3D7_0112300-1	18S+ribosomal+RNA	PF3D7_0112300-1	2149	PF3D7_0112300
Pf3D7_01_v3	474287	A		549		180	249	220	293	284	285	0.421917	0.522413	0.848201	0.962842	rna_PF3D7_0112300-1	rna_PF3D7_0112300-1	Pf3D7_01_v3	473739	475887	PF3D7_0112300-1	18S+ribosomal+RNA	PF3D7_0112300-1	2149	PF3D7_0112300
Pf3D7_01_v3	474288	T		550		175	260	194	274	320	239	0.393336	0.442687	0.705828	0.719652	rna_PF3D7_0112300-1	rna_PF3D7_0112300-1	Pf3D7_01_v3	473739	475887	PF3D7_0112300-1	18S+ribosomal+RNA	PF3D7_0112300-1	2149	PF3D7_0112300
Pf3D7_01_v3	474289	T		551		118	124	101	170	144	158	0.556897	0.488376	0.969035	1.0508	rna_PF3D7_0112300-1	rna_PF3D7_0112300-1	Pf3D7_01_v3	473739	475887	PF3D7_0112300-1	18S+ribosomal+RNA	PF3D7_0112300-1	2149	PF3D7_0112300
Pf3D7_01_v3	474290	G		552		90	26	60	135	34	84	1.89008	1.31527	3.02309	2.22764	rna_PF3D7_0112300-1	rna_PF3D7_0112300-1	Pf3D7_01_v3	473739	475887	PF3D7_0112300-1	18S+ribosomal+RNA	PF3D7_0112300-1	2149	PF3D7_0112300
Pf3D7_01_v3	474291	G		553		148	35	93	194	53	137	2.32064	1.51248	2.86406	2.37696	rna_PF3D7_0112300-1	rna_PF3D7_0112300-1	Pf3D7_01_v3	473739	475887	PF3D7_0112300-1	18S+ribosomal+RNA	PF3D7_0112300-1	2149	PF3D7_0112300
Pf3D7_01_v3	474292	A		554		78	37	35	116	39	62	1.19576	0.585586	2.30786	1.47659	rna_PF3D7_0112300-1	rna_PF3D7_0112300-1	Pf3D7_01_v3	473739	475887	PF3D7_0112300-1	18S+ribosomal+RNA	PF3D7_0112300-1	2149	PF3D7_0112300
Pf3D7_01_v3	474293	G		555		86	27	38	84	62	48	1.74989	0.840372	1.10452	0.757733	rna_PF3D7_0112300-1	rna_PF3D7_0112300-1	Pf3D7_01_v3	473739	475887	PF3D7_0112300-1	18S+ribosomal+RNA	PF3D7_0112300-1	2149	PF3D7_0112300
Pf3D7_01_v3	474294	G		556		86	64	51	122	77	77	0.781685	0.489131	1.2849	0.960941	rna_PF3D7_0112300-1	rna_PF3D7_0112300-1	Pf3D7_01_v3	473739	475887	PF3D7_0112300-1	18S+ribosomal+RNA	PF3D7_0112300-1	2149	PF3D7_0112300
Pf3D7_01_v3	474295	G		557		74	16	62	84	29	37	2.40459	2.07421	2.21172	1.19688	rna_PF3D7_0112300-1	rna_PF3D7_0112300-1	Pf3D7_01_v3	473739	475887	PF3D7_0112300-1	18S+ribosomal+RNA	PF3D7_0112300-1	2149	PF3D7_0112300
Pf3D7_01_v3	474296	C		558		74	126	81	160	184	107	0.352131	0.390003	0.719128	0.566879	rna_PF3D7_0112300-1	rna_PF3D7_0112300-1	Pf3D7_01_v3	473739	475887	PF3D7_0112300-1	18S+ribosomal+RNA	PF3D7_0112300-1	2149	PF3D7_0112300
Pf3D7_01_v3	474297	A		559		95	107	112	141	155	132	0.522815	0.622512	0.752305	0.821179	rna_PF3D7_0112300-1	rna_PF3D7_0112300-1	Pf3D7_01_v3	473739	475887	PF3D7_0112300-1	18S+ribosomal+RNA	PF3D7_0112300-1	2149	PF3D7_0112300
Pf3D7_01_v3	474298	A		560		88	60	110	114	100	108	0.84969	1.06926	0.937386	1.03432	rna_PF3D7_0112300-1	rna_PF3D7_0112300-1	Pf3D7_01_v3	473739	475887	PF3D7_0112300-1	18S+ribosomal+RNA	PF3D7_0112300-1	2149	PF3D7_0112300
Pf3D7_01_v3	474299	G		561		85	72	88	131	86	123	0.690491	0.725981	1.23838	1.35533	rna_PF3D7_0112300-1	rna_PF3D7_0112300-1	Pf3D7_01_v3	473739	475887	PF3D7_0112300-1	18S+ribosomal+RNA	PF3D7_0112300-1	2149	PF3D7_0112300
Pf3D7_01_v3	474300	T		562		69	50	80	141	52	69	0.803971	0.939539	2.13799	1.25336	rna_PF3D7_0112300-1	rna_PF3D7_0112300-1	Pf3D7_01_v3	473739	475887	PF3D7_0112300-1	18S+ribosomal+RNA	PF3D7_0112300-1	2149	PF3D7_0112300
Pf3D7_01_v3	474301	C		563		71	51	28	118	78	36	0.810373	0.357389	1.22917	0.469266	rna_PF3D7_0112300-1	rna_PF3D7_0112300-1	Pf3D7_01_v3	473739	475887	PF3D7_0112300-1	18S+ribosomal+RNA	PF3D7_0112300-1	2149	PF3D7_0112300
Pf3D7_01_v3	474302	T		564		39	25	22	80	40	36	0.906814	0.564831	1.58309	0.87528	rna_PF3D7_0112300-1	rna_PF3D7_0112300-1	Pf3D7_01_v3	473739	475887	PF3D7_0112300-1	18S+ribosomal+RNA	PF3D7_0112300-1	2149	PF3D7_0112300
Pf3D7_01_v3	474303	G		565		44	12	21	84	11	23	1.8926	1.01922	4.88001	1.74101	rna_PF3D7_0112300-1	rna_PF3D7_0112300-1	Pf3D7_01_v3	473739	475887	PF3D7_0112300-1	18S+ribosomal+RNA	PF3D7_0112300-1	2149	PF3D7_0112300
Pf3D7_01_v3	474304	G		566		33	18	13	76	22	23	1.04581	0.501993	2.55589	1.00216	rna_PF3D7_0112300-1	rna_PF3D7_0112300-1	Pf3D7_01_v3	473739	475887	PF3D7_0112300-1	18S+ribosomal+RNA	PF3D7_0112300-1	2149	PF3D7_0112300
Pf3D7_01_v3	474305	T		567		34	6	15	64	22	14	2.52506	1.31285	2.17621	0.669188	rna_PF3D7_0112300-1	rna_PF3D7_0112300-1	Pf3D7_01_v3	473739	475887	PF3D7_0112300-1	18S+ribosomal+RNA	PF3D7_0112300-1	2149	PF3D7_0112300
Pf3D7_01_v3	474306	G		568		28	13	4	77	18	8	1.1943	0.328393	3.05971	0.528815	rna_PF3D7_0112300-1	rna_PF3D7_0112300-1	Pf3D7_01_v3	473739	475887	PF3D7_0112300-1	18S+ribosomal+RNA	PF3D7_0112300-1	2149	PF3D7_0112300
Pf3D7_01_v3	474307	C		569		18	3	3	26	12	8	2.24992	0.788003	1.58562	0.728117	rna_PF3D7_0112300-1	rna_PF3D7_0112300-1	Pf3D7_01_v3	473739	475887	PF3D7_0112300-1	18S+ribosomal+RNA	PF3D7_0112300-1	2149	PF3D7_0112300
Pf3D7_01_v3	474308	C		570		11	4	6	23	10	7	1.33741	0.928734	1.63669	0.763841	rna_PF3D7_0112300-1	rna_PF3D7_0112300-1	Pf3D7_01_v3	473739	475887	PF3D7_0112300-1	18S+ribosomal+RNA	PF3D7_0112300-1	2149	PF3D7_0112300
Pf3D7_01_v3	474309	A		571		10	3	13	26	10	19	1.46734	1.7843	1.81343	1.59052	rna_PF3D7_0112300-1	rna_PF3D7_0112300-1	Pf3D7_01_v3	473739	475887	PF3D7_0112300-1	18S+ribosomal+RNA	PF3D7_0112300-1	2149	PF3D7_0112300
Pf3D7_01_v3	474310	G		572		6	0	7	13	7	9	2.2	2.42587	1.3353	1.14932	rna_PF3D7_0112300-1	rna_PF3D7_0112300-1	Pf3D7_01_v3	473739	475887	PF3D7_0112300-1	18S+ribosomal+RNA	PF3D7_0112300-1	2149	PF3D7_0112300
Pf3D7_01_v3	474311	C		573		3	0	3	9	2	9	1.6	1.61109	1.90896	2.12003	rna_PF3D7_0112300-1	rna_PF3D7_0112300-1	Pf3D7_01_v3	473739	475887	PF3D7_0112300-1	18S+ribosomal+RNA	PF3D7_0112300-1	2149	PF3D7_0112300
Pf3D7_01_v3	474312	A		574		1	0	0	4	1	2	1.2	1	1.46351	1.18657	rna_PF3D7_0112300-1	rna_PF3D7_0112300-1	Pf3D7_01_v3	473739	475887	PF3D7_0112300-1	18S+ribosomal+RNA	PF3D7_0112300-1	2149	PF3D7_0112300
Pf3D7_01_v3	474313	G		575		0	0	2	5	6	5	1	1.40739	0.808526	0.878505	rna_PF3D7_0112300-1	rna_PF3D7_0112300-1	Pf3D7_01_v3	473739	475887	PF3D7_0112300-1	18S+ribosomal+RNA	PF3D7_0112300-1	2149	PF3D7_0112300
Pf3D7_01_v3	474314	C		576		0	0	0	1	3	3	1	1	0.684988	0.982205	rna_PF3D7_0112300-1	rna_PF3D7_0112300-1	Pf3D7_01_v3	473739	475887	PF3D7_0112300-1	18S+ribosomal+RNA	PF3D7_0112300-1	2149	PF3D7_0112300
Pf3D7_01_v3	474315	C		577		1	0	0	2	1	6	1.2	1	1.13013	1.9662	rna_PF3D7_0112300-1	rna_PF3D7_0112300-1	Pf3D7_01_v3	473739	475887	PF3D7_0112300-1	18S+ribosomal+RNA	PF3D7_0112300-1	2149	PF3D7_0112300
Pf3D7_01_v3	474316	G		578		0	0	0	1	2	0	1	1	0.800695	0.662162	rna_PF3D7_0112300-1	rna_PF3D7_0112300-1	Pf3D7_01_v3	473739	475887	PF3D7_0112300-1	18S+ribosomal+RNA	PF3D7_0112300-1	2149	PF3D7_0112300
Pf3D7_01_v3	474317	C		579		1	0	0	2	1	5	1.2	1	1.13013	1.77129	rna_PF3D7_0112300-1	rna_PF3D7_0112300-1	Pf3D7_01_v3	473739	475887	PF3D7_0112300-1	18S+ribosomal+RNA	PF3D7_0112300-1	2149	PF3D7_0112300
Pf3D7_01_v3	474318	G		580		0	0	0	2	2	2	1	1	0.939228	0.986133	rna_PF3D7_0112300-1	rna_PF3D7_0112300-1	Pf3D7_01_v3	473739	475887	PF3D7_0112300-1	18S+ribosomal+RNA	PF3D7_0112300-1	2149	PF3D7_0112300
Pf3D7_01_v3	474319	G		581		1	0	0	2	4	5	1.2	1	0.70205	1.10035	rna_PF3D7_0112300-1	rna_PF3D7_0112300-1	Pf3D7_01_v3	473739	475887	PF3D7_0112300-1	18S+ribosomal+RNA	PF3D7_0112300-1	2149	PF3D7_0112300
Pf3D7_01_v3	474320	T		582		1	0	0	9	5	7	1.2	1	1.26693	1.192	rna_PF3D7_0112300-1	rna_PF3D7_0112300-1	Pf3D7_01_v3	473739	475887	PF3D7_0112300-1	18S+ribosomal+RNA	PF3D7_0112300-1	2149	PF3D7_0112300
Pf3D7_01_v3	474321	A		583		0	0	0	13	10	8	1	1	1.04752	0.832732	rna_PF3D7_0112300-1	rna_PF3D7_0112300-1	Pf3D7_01_v3	473739	475887	PF3D7_0112300-1	18S+ribosomal+RNA	PF3D7_0112300-1	2149	PF3D7_0112300
Pf3D7_01_v3	474322	A		584		0	0	0	10	3	8	1	1	1.75161	1.67509	rna_PF3D7_0112300-1	rna_PF3D7_0112300-1	Pf3D7_01_v3	473739	475887	PF3D7_0112300-1	18S+ribosomal+RNA	PF3D7_0112300-1	2149	PF3D7_0112300
Pf3D7_01_v3	474323	T		585		2	1	6	9	7	21	1.03844	1.64828	1.03489	2.20311	rna_PF3D7_0112300-1	rna_PF3D7_0112300-1	Pf3D7_01_v3	473739	475887	PF3D7_0112300-1	18S+ribosomal+RNA	PF3D7_0112300-1	2149	PF3D7_0112300
Pf3D7_01_v3	474324	T		586		1	0	0	5	4	5	1.2	1	1.0127	1.10035	rna_PF3D7_0112300-1	rna_PF3D7_0112300-1	Pf3D7_01_v3	473739	475887	PF3D7_0112300-1	18S+ribosomal+RNA	PF3D7_0112300-1	2149	PF3D7_0112300
Pf3D7_01_v3	474325	C		587		0	0	0	8	1	0	1	1	2.13027	0.796748	rna_PF3D7_0112300-1	rna_PF3D7_0112300-1	Pf3D7_01_v3	473739	475887	PF3D7_0112300-1	18S+ribosomal+RNA	PF3D7_0112300-1	2149	PF3D7_0112300
Pf3D7_01_v3	474326	C		588		1	0	0	6	8	1	1.2	1	0.741669	0.409308	rna_PF3D7_0112300-1	rna_PF3D7_0112300-1	Pf3D7_01_v3	473739	475887	PF3D7_0112300-1	18S+ribosomal+RNA	PF3D7_0112300-1	2149	PF3D7_0112300
Pf3D7_01_v3	474327	A		589		0	0	0	4	1	0	1	1	1.46351	0.796748	rna_PF3D7_0112300-1	rna_PF3D7_0112300-1	Pf3D7_01_v3	473739	475887	PF3D7_0112300-1	18S+ribosomal+RNA	PF3D7_0112300-1	2149	PF3D7_0112300
Pf3D7_01_v3	474328	G		590		0	0	0	4	1	1	1	1	1.46351	0.991657	rna_PF3D7_0112300-1	rna_PF3D7_0112300-1	Pf3D7_01_v3	473739	475887	PF3D7_0112300-1	18S+ribosomal+RNA	PF3D7_0112300-1	2149	PF3D7_0112300
Pf3D7_01_v3	474329	C		591		0	0	0	5	4	0	1	1	1.0127	0.49495	rna_PF3D7_0112300-1	rna_PF3D7_0112300-1	Pf3D7_01_v3	473739	475887	PF3D7_0112300-1	18S+ribosomal+RNA	PF3D7_0112300-1	2149	PF3D7_0112300
Pf3D7_01_v3	474330	T		592		1	0	0	5	3	0	1.2	1	1.15904	0.566474	rna_PF3D7_0112300-1	rna_PF3D7_0112300-1	Pf3D7_01_v3	473739	475887	PF3D7_0112300-1	18S+ribosomal+RNA	PF3D7_0112300-1	2149	PF3D7_0112300
Pf3D7_01_v3	474331	C		593		0	0	0	1	2	0	1	1	0.800695	0.662162	rna_PF3D7_0112300-1	rna_PF3D7_0112300-1	Pf3D7_01_v3	473739	475887	PF3D7_0112300-1	18S+ribosomal+RNA	PF3D7_0112300-1	2149	PF3D7_0112300
Pf3D7_01_v3	474332	C		594		1	1	0	4	0	2	0.890094	0.741745	1.83685	1.48926	rna_PF3D7_0112300-1	rna_PF3D7_0112300-1	Pf3D7_01_v3	473739	475887	PF3D7_0112300-1	18S+ribosomal+RNA	PF3D7_0112300-1	2149	PF3D7_0112300
Pf3D7_01_v3	474333	A		595		0	2	0	7	7	10	0.589503	0.589503	0.88469	1.23714	rna_PF3D7_0112300-1	rna_PF3D7_0112300-1	Pf3D7_01_v3	473739	475887	PF3D7_0112300-1	18S+ribosomal+RNA	PF3D7_0112300-1	2149	PF3D7_0112300
Pf3D7_01_v3	474334	A		596		1	0	1	13	4	14	1.2	1.2037	1.8411	2.19007	rna_PF3D7_0112300-1	rna_PF3D7_0112300-1	Pf3D7_01_v3	473739	475887	PF3D7_0112300-1	18S+ribosomal+RNA	PF3D7_0112300-1	2149	PF3D7_0112300
Pf3D7_01_v3	474335	T		597		1	0	1	5	6	8	1.2	1.2037	0.808526	1.16851	rna_PF3D7_0112300-1	rna_PF3D7_0112300-1	Pf3D7_01_v3	473739	475887	PF3D7_0112300-1	18S+ribosomal+RNA	PF3D7_0112300-1	2149	PF3D7_0112300
Pf3D7_01_v3	474336	A		598		0	0	0	6	7	9	1	1	0.809587	1.14932	rna_PF3D7_0112300-1	rna_PF3D7_0112300-1	Pf3D7_01_v3	473739	475887	PF3D7_0112300-1	18S+ribosomal+RNA	PF3D7_0112300-1	2149	PF3D7_0112300
Pf3D7_01_v3	474337	G		599		0	0	0	5	1	4	1	1	1.6302	1.57638	rna_PF3D7_0112300-1	rna_PF3D7_0112300-1	Pf3D7_01_v3	473739	475887	PF3D7_0112300-1	18S+ribosomal+RNA	PF3D7_0112300-1	2149	PF3D7_0112300
Pf3D7_01_v3	474338	C		600		6	3	3	9	2	6	1.07605	0.788003	1.90896	1.63407	rna_PF3D7_0112300-1	rna_PF3D7_0112300-1	Pf3D7_01_v3	473739	475887	PF3D7_0112300-1	18S+ribosomal+RNA	PF3D7_0112300-1	2149	PF3D7_0112300
Pf3D7_01_v3	474339	A		601		7	0	10	15	8	15	2.4	3.03695	1.36088	1.53559	rna_PF3D7_0112300-1	rna_PF3D7_0112300-1	Pf3D7_01_v3	473739	475887	PF3D7_0112300-1	18S+ribosomal+RNA	PF3D7_0112300-1	2149	PF3D7_0112300
Pf3D7_01_v3	474340	T		602		1	0	0	0	9	5	1.2	1	0.303406	0.674517	rna_PF3D7_0112300-1	rna_PF3D7_0112300-1	Pf3D7_01_v3	473739	475887	PF3D7_0112300-1	18S+ribosomal+RNA	PF3D7_0112300-1	2149	PF3D7_0112300
Pf3D7_01_v3	474341	A		603		1	1	1	8	12	3	0.890094	0.892835	0.65835	0.426938	rna_PF3D7_0112300-1	rna_PF3D7_0112300-1	Pf3D7_01_v3	473739	475887	PF3D7_0112300-1	18S+ribosomal+RNA	PF3D7_0112300-1	2149	PF3D7_0112300
Pf3D7_01_v3	474342	T		604		0	0	0	17	13	16	1	1	1.05567	1.13849	rna_PF3D7_0112300-1	rna_PF3D7_0112300-1	Pf3D7_01_v3	473739	475887	PF3D7_0112300-1	18S+ribosomal+RNA	PF3D7_0112300-1	2149	PF3D7_0112300
Pf3D7_01_v3	474343	A		605		2	1	1	15	7	13	1.03844	0.892835	1.48551	1.50058	rna_PF3D7_0112300-1	rna_PF3D7_0112300-1	Pf3D7_01_v3	473739	475887	PF3D7_0112300-1	18S+ribosomal+RNA	PF3D7_0112300-1	2149	PF3D7_0112300
Pf3D7_01_v3	474344	T		606		0	0	1	10	6	10	1	1.2037	1.22189	1.36185	rna_PF3D7_0112300-1	rna_PF3D7_0112300-1	Pf3D7_01_v3	473739	475887	PF3D7_0112300-1	18S+ribosomal+RNA	PF3D7_0112300-1	2149	PF3D7_0112300
Pf3D7_01_v3	474345	T		607		0	1	1	5	6	11	0.741745	0.892835	0.808526	1.45852	rna_PF3D7_0112300-1	rna_PF3D7_0112300-1	Pf3D7_01_v3	473739	475887	PF3D7_0112300-1	18S+ribosomal+RNA	PF3D7_0112300-1	2149	PF3D7_0112300
Pf3D7_01_v3	474346	A		608		1	2	2	10	15	16	0.707403	0.829661	0.640653	1.01814	rna_PF3D7_0112300-1	rna_PF3D7_0112300-1	Pf3D7_01_v3	473739	475887	PF3D7_0112300-1	18S+ribosomal+RNA	PF3D7_0112300-1	2149	PF3D7_0112300
Pf3D7_01_v3	474347	A		609		0	0	2	7	1	9	1	1.40739	1.96358	2.55093	rna_PF3D7_0112300-1	rna_PF3D7_0112300-1	Pf3D7_01_v3	473739	475887	PF3D7_0112300-1	18S+ribosomal+RNA	PF3D7_0112300-1	2149	PF3D7_0112300
Pf3D7_01_v3	474348	A		610		0	0	4	14	11	17	1	1.81478	1.03228	1.35538	rna_PF3D7_0112300-1	rna_PF3D7_0112300-1	Pf3D7_01_v3	473739	475887	PF3D7_0112300-1	18S+ribosomal+RNA	PF3D7_0112300-1	2149	PF3D7_0112300
Pf3D7_01_v3	474349	A		611		1	0	1	12	19	16	1.2	1.2037	0.60041	0.840456	rna_PF3D7_0112300-1	rna_PF3D7_0112300-1	Pf3D7_01_v3	473739	475887	PF3D7_0112300-1	18S+ribosomal+RNA	PF3D7_0112300-1	2149	PF3D7_0112300
Pf3D7_01_v3	474350	T		612		0	0	0	8	8	6	1	1	0.879272	0.811554	rna_PF3D7_0112300-1	rna_PF3D7_0112300-1	Pf3D7_01_v3	473739	475887	PF3D7_0112300-1	18S+ribosomal+RNA	PF3D7_0112300-1	2149	PF3D7_0112300
Pf3D7_01_v3	474351	T		613		0	0	1	4	1	7	1	1.2037	1.46351	2.16111	rna_PF3D7_0112300-1	rna_PF3D7_0112300-1	Pf3D7_01_v3	473739	475887	PF3D7_0112300-1	18S+ribosomal+RNA	PF3D7_0112300-1	2149	PF3D7_0112300
Pf3D7_01_v3	474352	G		614		0	0	0	7	4	5	1	1	1.2198	1.10035	rna_PF3D7_0112300-1	rna_PF3D7_0112300-1	Pf3D7_01_v3	473739	475887	PF3D7_0112300-1	18S+ribosomal+RNA	PF3D7_0112300-1	2149	PF3D7_0112300
Pf3D7_01_v3	474353	T		615		0	0	0	6	5	2	1	1	0.991109	0.654474	rna_PF3D7_0112300-1	rna_PF3D7_0112300-1	Pf3D7_01_v3	473739	475887	PF3D7_0112300-1	18S+ribosomal+RNA	PF3D7_0112300-1	2149	PF3D7_0112300
Pf3D7_01_v3	474354	T		616		0	0	1	5	0	11	1	1.2037	2.04607	3.69094	rna_PF3D7_0112300-1	rna_PF3D7_0112300-1	Pf3D7_01_v3	473739	475887	PF3D7_0112300-1	18S+ribosomal+RNA	PF3D7_0112300-1	2149	PF3D7_0112300
Pf3D7_01_v3	474355	G		617		0	0	0	4	0	9	1	1	1.83685	3.20168	rna_PF3D7_0112300-1	rna_PF3D7_0112300-1	Pf3D7_01_v3	473739	475887	PF3D7_0112300-1	18S+ribosomal+RNA	PF3D7_0112300-1	2149	PF3D7_0112300
Pf3D7_01_v3	474356	C		618		1	1	1	4	12	4	0.890094	0.892835	0.452291	0.487174	rna_PF3D7_0112300-1	rna_PF3D7_0112300-1	Pf3D7_01_v3	473739	475887	PF3D7_0112300-1	18S+ribosomal+RNA	PF3D7_0112300-1	2149	PF3D7_0112300
Pf3D7_01_v3	474357	A		619		1	0	0	5	3	9	1.2	1	1.15904	1.81367	rna_PF3D7_0112300-1	rna_PF3D7_0112300-1	Pf3D7_01_v3	473739	475887	PF3D7_0112300-1	18S+ribosomal+RNA	PF3D7_0112300-1	2149	PF3D7_0112300
Pf3D7_01_v3	474358	G		620		0	1	2	6	5	11	0.741745	1.04392	0.991109	1.62203	rna_PF3D7_0112300-1	rna_PF3D7_0112300-1	Pf3D7_01_v3	473739	475887	PF3D7_0112300-1	18S+ribosomal+RNA	PF3D7_0112300-1	2149	PF3D7_0112300
Pf3D7_01_v3	474359	T		621		0	0	3	4	10	13	1	1.61109	0.517275	1.17718	rna_PF3D7_0112300-1	rna_PF3D7_0112300-1	Pf3D7_01_v3	473739	475887	PF3D7_0112300-1	18S+ribosomal+RNA	PF3D7_0112300-1	2149	PF3D7_0112300
Pf3D7_01_v3	474360	T		622		0	2	0	7	8	11	0.589503	0.589503	0.810471	1.2138	rna_PF3D7_0112300-1	rna_PF3D7_0112300-1	Pf3D7_01_v3	473739	475887	PF3D7_0112300-1	18S+ribosomal+RNA	PF3D7_0112300-1	2149	PF3D7_0112300
Pf3D7_01_v3	474361	A		623		0	0	2	0	7	6	1	1.40739	0.358975	0.885872	rna_PF3D7_0112300-1	rna_PF3D7_0112300-1	Pf3D7_01_v3	473739	475887	PF3D7_0112300-1	18S+ribosomal+RNA	PF3D7_0112300-1	2149	PF3D7_0112300
Pf3D7_01_v3	474362	A		624		1	0	0	6	3	19	1.2	1	1.27756	3.19944	rna_PF3D7_0112300-1	rna_PF3D7_0112300-1	Pf3D7_01_v3	473739	475887	PF3D7_0112300-1	18S+ribosomal+RNA	PF3D7_0112300-1	2149	PF3D7_0112300
Pf3D7_01_v3	474363	A		625		0	2	3	9	24	17	0.589503	0.949739	0.404765	0.724291	rna_PF3D7_0112300-1	rna_PF3D7_0112300-1	Pf3D7_01_v3	473739	475887	PF3D7_0112300-1	18S+ribosomal+RNA	PF3D7_0112300-1	2149	PF3D7_0112300
Pf3D7_01_v3	474364	A		626		0	0	0	1	4	2	1	1	0.5985	0.737109	rna_PF3D7_0112300-1	rna_PF3D7_0112300-1	Pf3D7_01_v3	473739	475887	PF3D7_0112300-1	18S+ribosomal+RNA	PF3D7_0112300-1	2149	PF3D7_0112300
Pf3D7_01_v3	474365	C		627		0	0	2	7	0	2	1	1.40739	2.46449	1.48926	rna_PF3D7_0112300-1	rna_PF3D7_0112300-1	Pf3D7_01_v3	473739	475887	PF3D7_0112300-1	18S+ribosomal+RNA	PF3D7_0112300-1	2149	PF3D7_0112300
Pf3D7_01_v3	474366	G		628		0	0	2	5	1	2	1	1.40739	1.6302	1.18657	rna_PF3D7_0112300-1	rna_PF3D7_0112300-1	Pf3D7_01_v3	473739	475887	PF3D7_0112300-1	18S+ribosomal+RNA	PF3D7_0112300-1	2149	PF3D7_0112300
Pf3D7_01_v3	474367	T		629		2	0	4	9	6	2	1.4	1.81478	1.13922	0.588499	rna_PF3D7_0112300-1	rna_PF3D7_0112300-1	Pf3D7_01_v3	473739	475887	PF3D7_0112300-1	18S+ribosomal+RNA	PF3D7_0112300-1	2149	PF3D7_0112300
Pf3D7_01_v3	474368	T		630		0	1	0	5	6	1	0.741745	0.741745	0.808526	0.49183	rna_PF3D7_0112300-1	rna_PF3D7_0112300-1	Pf3D7_01_v3	473739	475887	PF3D7_0112300-1	18S+ribosomal+RNA	PF3D7_0112300-1	2149	PF3D7_0112300
Pf3D7_01_v3	474369	C		631		0	0	0	8	1	1	1	1	2.13027	0.991657	rna_PF3D7_0112300-1	rna_PF3D7_0112300-1	Pf3D7_01_v3	473739	475887	PF3D7_0112300-1	18S+ribosomal+RNA	PF3D7_0112300-1	2149	PF3D7_0112300
Pf3D7_01_v3	474370	G		632		0	0	0	8	2	1	1	1	1.77043	0.824148	rna_PF3D7_0112300-1	rna_PF3D7_0112300-1	Pf3D7_01_v3	473739	475887	PF3D7_0112300-1	18S+ribosomal+RNA	PF3D7_0112300-1	2149	PF3D7_0112300
Pf3D7_01_v3	474371	T		633		0	0	0	8	8	5	1	1	0.879272	0.731104	rna_PF3D7_0112300-1	rna_PF3D7_0112300-1	Pf3D7_01_v3	473739	475887	PF3D7_0112300-1	18S+ribosomal+RNA	PF3D7_0112300-1	2149	PF3D7_0112300
Pf3D7_01_v3	474372	A		634		0	0	2	8	1	0	1	1.40739	2.13027	0.796748	rna_PF3D7_0112300-1	rna_PF3D7_0112300-1	Pf3D7_01_v3	473739	475887	PF3D7_0112300-1	18S+ribosomal+RNA	PF3D7_0112300-1	2149	PF3D7_0112300
Pf3D7_01_v3	474373	G		635		0	2	0	2	5	2	0.589503	0.589503	0.623344	0.654474	rna_PF3D7_0112300-1	rna_PF3D7_0112300-1	Pf3D7_01_v3	473739	475887	PF3D7_0112300-1	18S+ribosomal+RNA	PF3D7_0112300-1	2149	PF3D7_0112300
Pf3D7_01_v3	474374	T		636		0	0	0	5	5	1	1	1	0.899168	0.546968	rna_PF3D7_0112300-1	rna_PF3D7_0112300-1	Pf3D7_01_v3	473739	475887	PF3D7_0112300-1	18S+ribosomal+RNA	PF3D7_0112300-1	2149	PF3D7_0112300
Pf3D7_01_v3	474375	T		637		0	0	0	1	8	5	1	1	0.397661	0.731104	rna_PF3D7_0112300-1	rna_PF3D7_0112300-1	Pf3D7_01_v3	473739	475887	PF3D7_0112300-1	18S+ribosomal+RNA	PF3D7_0112300-1	2149	PF3D7_0112300
Pf3D7_01_v3	474376	G		638		0	0	0	3	1	1	1	1	1.29682	0.991657	rna_PF3D7_0112300-1	rna_PF3D7_0112300-1	Pf3D7_01_v3	473739	475887	PF3D7_0112300-1	18S+ribosomal+RNA	PF3D7_0112300-1	2149	PF3D7_0112300
Pf3D7_01_v3	474377	A		639		0	1	2	12	5	14	0.741745	1.04392	1.54276	1.94454	rna_PF3D7_0112300-1	rna_PF3D7_0112300-1	Pf3D7_01_v3	473739	475887	PF3D7_0112300-1	18S+ribosomal+RNA	PF3D7_0112300-1	2149	PF3D7_0112300
Pf3D7_01_v3	474378	A		640		2	0	0	5	8	5	1.4	1	0.672867	0.731104	rna_PF3D7_0112300-1	rna_PF3D7_0112300-1	Pf3D7_01_v3	473739	475887	PF3D7_0112300-1	18S+ribosomal+RNA	PF3D7_0112300-1	2149	PF3D7_0112300
Pf3D7_01_v3	474379	T		641		0	2	3	9	12	11	0.589503	0.949739	0.709864	0.908824	rna_PF3D7_0112300-1	rna_PF3D7_0112300-1	Pf3D7_01_v3	473739	475887	PF3D7_0112300-1	18S+ribosomal+RNA	PF3D7_0112300-1	2149	PF3D7_0112300
Pf3D7_01_v3	474380	A		642		0	0	3	11	12	7	1	1.61109	0.812894	0.667881	rna_PF3D7_0112300-1	rna_PF3D7_0112300-1	Pf3D7_01_v3	473739	475887	PF3D7_0112300-1	18S+ribosomal+RNA	PF3D7_0112300-1	2149	PF3D7_0112300
Pf3D7_01_v3	474381	T		643		0	1	1	9	9	8	0.741745	0.892835	0.874694	0.897184	rna_PF3D7_0112300-1	rna_PF3D7_0112300-1	Pf3D7_01_v3	473739	475887	PF3D7_0112300-1	18S+ribosomal+RNA	PF3D7_0112300-1	2149	PF3D7_0112300
Pf3D7_01_v3	474382	T		644		0	0	0	9	3	19	1	1	1.6331	3.19944	rna_PF3D7_0112300-1	rna_PF3D7_0112300-1	Pf3D7_01_v3	473739	475887	PF3D7_0112300-1	18S+ribosomal+RNA	PF3D7_0112300-1	2149	PF3D7_0112300
Pf3D7_01_v3	474383	A		645		1	1	3	9	9	12	0.890094	1.19501	0.874694	1.19407	rna_PF3D7_0112300-1	rna_PF3D7_0112300-1	Pf3D7_01_v3	473739	475887	PF3D7_0112300-1	18S+ribosomal+RNA	PF3D7_0112300-1	2149	PF3D7_0112300
Pf3D7_01_v3	474384	A		646		0	0	0	6	5	7	1	1	0.991109	1.192	rna_PF3D7_0112300-1	rna_PF3D7_0112300-1	Pf3D7_01_v3	473739	475887	PF3D7_0112300-1	18S+ribosomal+RNA	PF3D7_0112300-1	2149	PF3D7_0112300
Pf3D7_01_v3	474385	A		647		0	0	0	4	3	4	1	1	1.04053	1.12078	rna_PF3D7_0112300-1	rna_PF3D7_0112300-1	Pf3D7_01_v3	473739	475887	PF3D7_0112300-1	18S+ribosomal+RNA	PF3D7_0112300-1	2149	PF3D7_0112300
Pf3D7_01_v3	474386	G		648		0	0	0	16	4	5	1	1	2.15175	1.10035	rna_PF3D7_0112300-1	rna_PF3D7_0112300-1	Pf3D7_01_v3	473739	475887	PF3D7_0112300-1	18S+ribosomal+RNA	PF3D7_0112300-1	2149	PF3D7_0112300
Pf3D7_01_v3	474387	A		649		0	0	2	7	0	17	1	1.40739	2.46449	5.15872	rna_PF3D7_0112300-1	rna_PF3D7_0112300-1	Pf3D7_01_v3	473739	475887	PF3D7_0112300-1	18S+ribosomal+RNA	PF3D7_0112300-1	2149	PF3D7_0112300
Pf3D7_01_v3	474388	A		650		0	0	1	9	11	3	1	1.2037	0.757443	0.455554	rna_PF3D7_0112300-1	rna_PF3D7_0112300-1	Pf3D7_01_v3	473739	475887	PF3D7_0112300-1	18S+ribosomal+RNA	PF3D7_0112300-1	2149	PF3D7_0112300
Pf3D7_01_v3	474389	T		651		0	1	1	4	4	6	0.741745	0.892835	0.909149	1.22143	rna_PF3D7_0112300-1	rna_PF3D7_0112300-1	Pf3D7_01_v3	473739	475887	PF3D7_0112300-1	18S+ribosomal+RNA	PF3D7_0112300-1	2149	PF3D7_0112300
Pf3D7_01_v3	474390	C		652		0	0	0	4	1	1	1	1	1.46351	0.991657	rna_PF3D7_0112300-1	rna_PF3D7_0112300-1	Pf3D7_01_v3	473739	475887	PF3D7_0112300-1	18S+ribosomal+RNA	PF3D7_0112300-1	2149	PF3D7_0112300
Pf3D7_01_v3	474391	C		653		0	0	1	1	0	1	1	1.2037	1.20921	1.24463	rna_PF3D7_0112300-1	rna_PF3D7_0112300-1	Pf3D7_01_v3	473739	475887	PF3D7_0112300-1	18S+ribosomal+RNA	PF3D7_0112300-1	2149	PF3D7_0112300
Pf3D7_01_v3	474392	G		654		0	0	3	10	5	15	1	1.61109	1.35887	2.05205	rna_PF3D7_0112300-1	rna_PF3D7_0112300-1	Pf3D7_01_v3	473739	475887	PF3D7_0112300-1	18S+ribosomal+RNA	PF3D7_0112300-1	2149	PF3D7_0112300
Pf3D7_01_v3	474393	A		655		1	0	0	8	2	2	1.2	1	1.77043	0.986133	rna_PF3D7_0112300-1	rna_PF3D7_0112300-1	Pf3D7_01_v3	473739	475887	PF3D7_0112300-1	18S+ribosomal+RNA	PF3D7_0112300-1	2149	PF3D7_0112300
Pf3D7_01_v3	474394	T		656		0	0	0	3	4	1	1	1	0.805599	0.61603	rna_PF3D7_0112300-1	rna_PF3D7_0112300-1	Pf3D7_01_v3	473739	475887	PF3D7_0112300-1	18S+ribosomal+RNA	PF3D7_0112300-1	2149	PF3D7_0112300
Pf3D7_01_v3	474395	G		657		0	0	0	2	0	5	1	1	1.41843	2.22315	rna_PF3D7_0112300-1	rna_PF3D7_0112300-1	Pf3D7_01_v3	473739	475887	PF3D7_0112300-1	18S+ribosomal+RNA	PF3D7_0112300-1	2149	PF3D7_0112300
Pf3D7_01_v3	474396	T		658		0	0	2	2	0	1	1	1.40739	1.41843	1.24463	rna_PF3D7_0112300-1	rna_PF3D7_0112300-1	Pf3D7_01_v3	473739	475887	PF3D7_0112300-1	18S+ribosomal+RNA	PF3D7_0112300-1	2149	PF3D7_0112300
Pf3D7_01_v3	474397	T		659		1	0	0	10	1	4	1.2	1	2.46365	1.57638	rna_PF3D7_0112300-1	rna_PF3D7_0112300-1	Pf3D7_01_v3	473739	475887	PF3D7_0112300-1	18S+ribosomal+RNA	PF3D7_0112300-1	2149	PF3D7_0112300
Pf3D7_01_v3	474398	T		660		0	0	0	1	1	2	1	1	0.963438	1.18657	rna_PF3D7_0112300-1	rna_PF3D7_0112300-1	Pf3D7_01_v3	473739	475887	PF3D7_0112300-1	18S+ribosomal+RNA	PF3D7_0112300-1	2149	PF3D7_0112300
Pf3D7_01_v3	474399	C		661		0	1	1	11	2	7	0.741745	0.892835	2.18603	1.79606	rna_PF3D7_0112300-1	rna_PF3D7_0112300-1	Pf3D7_01_v3	473739	475887	PF3D7_0112300-1	18S+ribosomal+RNA	PF3D7_0112300-1	2149	PF3D7_0112300
Pf3D7_01_v3	474400	A		662		0	0	1	8	5	3	1	1.2037	1.17499	0.76198	rna_PF3D7_0112300-1	rna_PF3D7_0112300-1	Pf3D7_01_v3	473739	475887	PF3D7_0112300-1	18S+ribosomal+RNA	PF3D7_0112300-1	2149	PF3D7_0112300
Pf3D7_01_v3	474401	T		663		0	1	0	4	6	3	0.741745	0.741745	0.725853	0.685167	rna_PF3D7_0112300-1	rna_PF3D7_0112300-1	Pf3D7_01_v3	473739	475887	PF3D7_0112300-1	18S+ribosomal+RNA	PF3D7_0112300-1	2149	PF3D7_0112300
Pf3D7_01_v3	474402	T		664		0	0	2	4	7	11	1	1.40739	0.659383	1.32495	rna_PF3D7_0112300-1	rna_PF3D7_0112300-1	Pf3D7_01_v3	473739	475887	PF3D7_0112300-1	18S+ribosomal+RNA	PF3D7_0112300-1	2149	PF3D7_0112300
Pf3D7_01_v3	474403	T		665		0	0	1	2	1	6	1	1.2037	1.13013	1.9662	rna_PF3D7_0112300-1	rna_PF3D7_0112300-1	Pf3D7_01_v3	473739	475887	PF3D7_0112300-1	18S+ribosomal+RNA	PF3D7_0112300-1	2149	PF3D7_0112300
Pf3D7_01_v3	474404	A		666		2	1	0	11	1	13	1.03844	0.741745	2.63034	3.33056	rna_PF3D7_0112300-1	rna_PF3D7_0112300-1	Pf3D7_01_v3	473739	475887	PF3D7_0112300-1	18S+ribosomal+RNA	PF3D7_0112300-1	2149	PF3D7_0112300
Pf3D7_01_v3	474405	A		667		3	1	1	11	10	9	1.18679	0.892835	0.929689	0.901622	rna_PF3D7_0112300-1	rna_PF3D7_0112300-1	Pf3D7_01_v3	473739	475887	PF3D7_0112300-1	18S+ribosomal+RNA	PF3D7_0112300-1	2149	PF3D7_0112300
Pf3D7_01_v3	474406	A		668		0	0	0	3	2	0	1	1	1.07776	0.662162	rna_PF3D7_0112300-1	rna_PF3D7_0112300-1	Pf3D7_01_v3	473739	475887	PF3D7_0112300-1	18S+ribosomal+RNA	PF3D7_0112300-1	2149	PF3D7_0112300
Pf3D7_01_v3	474407	C		669		1	0	0	5	1	3	1.2	1	1.6302	1.38148	rna_PF3D7_0112300-1	rna_PF3D7_0112300-1	Pf3D7_01_v3	473739	475887	PF3D7_0112300-1	18S+ribosomal+RNA	PF3D7_0112300-1	2149	PF3D7_0112300
Pf3D7_01_v3	474408	T		670		0	0	0	1	0	2	1	1	1.20921	1.48926	rna_PF3D7_0112300-1	rna_PF3D7_0112300-1	Pf3D7_01_v3	473739	475887	PF3D7_0112300-1	18S+ribosomal+RNA	PF3D7_0112300-1	2149	PF3D7_0112300
Pf3D7_01_v3	474409	G		671		0	1	0	1	1	1	0.741745	0.741745	0.963438	0.991657	rna_PF3D7_0112300-1	rna_PF3D7_0112300-1	Pf3D7_01_v3	473739	475887	PF3D7_0112300-1	18S+ribosomal+RNA	PF3D7_0112300-1	2149	PF3D7_0112300
Pf3D7_01_v3	474410	G		672		1	0	1	6	2	4	1.2	1.2037	1.49336	1.3101	rna_PF3D7_0112300-1	rna_PF3D7_0112300-1	Pf3D7_01_v3	473739	475887	PF3D7_0112300-1	18S+ribosomal+RNA	PF3D7_0112300-1	2149	PF3D7_0112300
Pf3D7_01_v3	474411	T		673		0	0	0	1	4	1	1	1	0.5985	0.61603	rna_PF3D7_0112300-1	rna_PF3D7_0112300-1	Pf3D7_01_v3	473739	475887	PF3D7_0112300-1	18S+ribosomal+RNA	PF3D7_0112300-1	2149	PF3D7_0112300
Pf3D7_01_v3	474412	T		674		0	0	0	1	0	2	1	1	1.20921	1.48926	rna_PF3D7_0112300-1	rna_PF3D7_0112300-1	Pf3D7_01_v3	473739	475887	PF3D7_0112300-1	18S+ribosomal+RNA	PF3D7_0112300-1	2149	PF3D7_0112300
Pf3D7_01_v3	474413	T		675		0	0	0	1	0	0	1	1	1.20921	1	rna_PF3D7_0112300-1	rna_PF3D7_0112300-1	Pf3D7_01_v3	473739	475887	PF3D7_0112300-1	18S+ribosomal+RNA	PF3D7_0112300-1	2149	PF3D7_0112300
Pf3D7_01_v3	474414	G		676		0	0	0	2	0	0	1	1	1.41843	1	rna_PF3D7_0112300-1	rna_PF3D7_0112300-1	Pf3D7_01_v3	473739	475887	PF3D7_0112300-1	18S+ribosomal+RNA	PF3D7_0112300-1	2149	PF3D7_0112300
Pf3D7_01_v3	474415	G		677		2	0	0	1	0	0	1.4	1	1.20921	1	rna_PF3D7_0112300-1	rna_PF3D7_0112300-1	Pf3D7_01_v3	473739	475887	PF3D7_0112300-1	18S+ribosomal+RNA	PF3D7_0112300-1	2149	PF3D7_0112300
Pf3D7_01_v3	474416	G		678		0	0	0	7	2	0	1	1	1.63189	0.662162	rna_PF3D7_0112300-1	rna_PF3D7_0112300-1	Pf3D7_01_v3	473739	475887	PF3D7_0112300-1	18S+ribosomal+RNA	PF3D7_0112300-1	2149	PF3D7_0112300
Pf3D7_01_v3	474417	A		679		0	0	0	7	0	0	1	1	2.46449	1	rna_PF3D7_0112300-1	rna_PF3D7_0112300-1	Pf3D7_01_v3	473739	475887	PF3D7_0112300-1	18S+ribosomal+RNA	PF3D7_0112300-1	2149	PF3D7_0112300
Pf3D7_01_v3	474418	A		680		0	0	2	4	2	0	1	1.40739	1.21629	0.662162	rna_PF3D7_0112300-1	rna_PF3D7_0112300-1	Pf3D7_01_v3	473739	475887	PF3D7_0112300-1	18S+ribosomal+RNA	PF3D7_0112300-1	2149	PF3D7_0112300
Pf3D7_01_v3	474419	A		681		0	2	0	6	3	3	0.589503	0.589503	1.27756	0.982205	rna_PF3D7_0112300-1	rna_PF3D7_0112300-1	Pf3D7_01_v3	473739	475887	PF3D7_0112300-1	18S+ribosomal+RNA	PF3D7_0112300-1	2149	PF3D7_0112300
Pf3D7_01_v3	474420	A		682		0	1	0	2	3	3	0.741745	0.741745	0.803502	0.982205	rna_PF3D7_0112300-1	rna_PF3D7_0112300-1	Pf3D7_01_v3	473739	475887	PF3D7_0112300-1	18S+ribosomal+RNA	PF3D7_0112300-1	2149	PF3D7_0112300
Pf3D7_01_v3	474421	C		683		0	1	0	4	0	0	0.741745	0.741745	1.83685	1	rna_PF3D7_0112300-1	rna_PF3D7_0112300-1	Pf3D7_01_v3	473739	475887	PF3D7_0112300-1	18S+ribosomal+RNA	PF3D7_0112300-1	2149	PF3D7_0112300
Pf3D7_01_v3	474422	C		684		3	0	0	4	6	2	1.6	1	0.725853	0.588499	rna_PF3D7_0112300-1	rna_PF3D7_0112300-1	Pf3D7_01_v3	473739	475887	PF3D7_0112300-1	18S+ribosomal+RNA	PF3D7_0112300-1	2149	PF3D7_0112300
Pf3D7_01_v3	474423	A		685		0	0	1	9	2	8	1	1.2037	1.90896	1.95804	rna_PF3D7_0112300-1	rna_PF3D7_0112300-1	Pf3D7_01_v3	473739	475887	PF3D7_0112300-1	18S+ribosomal+RNA	PF3D7_0112300-1	2149	PF3D7_0112300
Pf3D7_01_v3	474424	A		686		0	1	0	9	4	12	0.741745	0.741745	1.4269	1.94791	rna_PF3D7_0112300-1	rna_PF3D7_0112300-1	Pf3D7_01_v3	473739	475887	PF3D7_0112300-1	18S+ribosomal+RNA	PF3D7_0112300-1	2149	PF3D7_0112300
Pf3D7_01_v3	474425	A		687		1	1	1	3	3	8	0.890094	0.892835	0.922016	1.67509	rna_PF3D7_0112300-1	rna_PF3D7_0112300-1	Pf3D7_01_v3	473739	475887	PF3D7_0112300-1	18S+ribosomal+RNA	PF3D7_0112300-1	2149	PF3D7_0112300
Pf3D7_01_v3	474426	T		688		0	2	0	8	10	7	0.589503	0.589503	0.75294	0.763841	rna_PF3D7_0112300-1	rna_PF3D7_0112300-1	Pf3D7_01_v3	473739	475887	PF3D7_0112300-1	18S+ribosomal+RNA	PF3D7_0112300-1	2149	PF3D7_0112300
Pf3D7_01_v3	474427	A		689		0	0	0	2	6	5	1	1	0.560507	0.878505	rna_PF3D7_0112300-1	rna_PF3D7_0112300-1	Pf3D7_01_v3	473739	475887	PF3D7_0112300-1	18S+ribosomal+RNA	PF3D7_0112300-1	2149	PF3D7_0112300
Pf3D7_01_v3	474428	T		690		0	1	0	7	18	8	0.741745	0.741745	0.44073	0.528815	rna_PF3D7_0112300-1	rna_PF3D7_0112300-1	Pf3D7_01_v3	473739	475887	PF3D7_0112300-1	18S+ribosomal+RNA	PF3D7_0112300-1	2149	PF3D7_0112300
Pf3D7_01_v3	474429	A		691		0	0	1	13	8	19	1	1.2037	1.22328	1.85739	rna_PF3D7_0112300-1	rna_PF3D7_0112300-1	Pf3D7_01_v3	473739	475887	PF3D7_0112300-1	18S+ribosomal+RNA	PF3D7_0112300-1	2149	PF3D7_0112300
Pf3D7_01_v3	474430	T		692		0	0	1	7	5	5	1	1.2037	1.08305	0.976992	rna_PF3D7_0112300-1	rna_PF3D7_0112300-1	Pf3D7_01_v3	473739	475887	PF3D7_0112300-1	18S+ribosomal+RNA	PF3D7_0112300-1	2149	PF3D7_0112300
Pf3D7_01_v3	474431	T		693		0	0	0	5	8	5	1	1	0.672867	0.731104	rna_PF3D7_0112300-1	rna_PF3D7_0112300-1	Pf3D7_01_v3	473739	475887	PF3D7_0112300-1	18S+ribosomal+RNA	PF3D7_0112300-1	2149	PF3D7_0112300
Pf3D7_01_v3	474432	A		694		0	0	1	5	7	6	1	1.2037	0.734485	0.885872	rna_PF3D7_0112300-1	rna_PF3D7_0112300-1	Pf3D7_01_v3	473739	475887	PF3D7_0112300-1	18S+ribosomal+RNA	PF3D7_0112300-1	2149	PF3D7_0112300
Pf3D7_01_v3	474433	T		695		0	1	1	6	10	8	0.741745	0.892835	0.635107	0.832732	rna_PF3D7_0112300-1	rna_PF3D7_0112300-1	Pf3D7_01_v3	473739	475887	PF3D7_0112300-1	18S+ribosomal+RNA	PF3D7_0112300-1	2149	PF3D7_0112300
Pf3D7_01_v3	474434	A		696		0	1	1	17	8	8	0.741745	0.892835	1.49849	0.972452	rna_PF3D7_0112300-1	rna_PF3D7_0112300-1	Pf3D7_01_v3	473739	475887	PF3D7_0112300-1	18S+ribosomal+RNA	PF3D7_0112300-1	2149	PF3D7_0112300
Pf3D7_01_v3	474435	T		697		2	3	1	9	9	16	0.684758	0.588743	0.874694	1.49096	rna_PF3D7_0112300-1	rna_PF3D7_0112300-1	Pf3D7_01_v3	473739	475887	PF3D7_0112300-1	18S+ribosomal+RNA	PF3D7_0112300-1	2149	PF3D7_0112300
Pf3D7_01_v3	474436	A		698		1	0	0	7	8	3	1.2	1	0.810471	0.570206	rna_PF3D7_0112300-1	rna_PF3D7_0112300-1	Pf3D7_01_v3	473739	475887	PF3D7_0112300-1	18S+ribosomal+RNA	PF3D7_0112300-1	2149	PF3D7_0112300
Pf3D7_01_v3	474437	T		699		0	1	0	2	6	3	0.741745	0.741745	0.560507	0.685167	rna_PF3D7_0112300-1	rna_PF3D7_0112300-1	Pf3D7_01_v3	473739	475887	PF3D7_0112300-1	18S+ribosomal+RNA	PF3D7_0112300-1	2149	PF3D7_0112300
Pf3D7_01_v3	474438	T		700		0	0	4	3	5	2	1	1.81478	0.715286	0.654474	rna_PF3D7_0112300-1	rna_PF3D7_0112300-1	Pf3D7_01_v3	473739	475887	PF3D7_0112300-1	18S+ribosomal+RNA	PF3D7_0112300-1	2149	PF3D7_0112300
Pf3D7_01_v3	474439	T		701		0	0	0	5	5	4	1	1	0.899168	0.869486	rna_PF3D7_0112300-1	rna_PF3D7_0112300-1	Pf3D7_01_v3	473739	475887	PF3D7_0112300-1	18S+ribosomal+RNA	PF3D7_0112300-1	2149	PF3D7_0112300
Pf3D7_01_v3	474440	T		702		1	0	0	0	6	0	1.2	1	0.395162	0.395162	rna_PF3D7_0112300-1	rna_PF3D7_0112300-1	Pf3D7_01_v3	473739	475887	PF3D7_0112300-1	18S+ribosomal+RNA	PF3D7_0112300-1	2149	PF3D7_0112300
Pf3D7_01_v3	474441	G		703		0	0	0	1	1	2	1	1	0.963438	1.18657	rna_PF3D7_0112300-1	rna_PF3D7_0112300-1	Pf3D7_01_v3	473739	475887	PF3D7_0112300-1	18S+ribosomal+RNA	PF3D7_0112300-1	2149	PF3D7_0112300
Pf3D7_01_v3	474442	C		704		0	1	2	9	6	12	0.741745	1.04392	1.13922	1.55518	rna_PF3D7_0112300-1	rna_PF3D7_0112300-1	Pf3D7_01_v3	473739	475887	PF3D7_0112300-1	18S+ribosomal+RNA	PF3D7_0112300-1	2149	PF3D7_0112300
Pf3D7_01_v3	474443	T		705		0	0	0	6	11	10	1	1	0.59254	0.905464	rna_PF3D7_0112300-1	rna_PF3D7_0112300-1	Pf3D7_01_v3	473739	475887	PF3D7_0112300-1	18S+ribosomal+RNA	PF3D7_0112300-1	2149	PF3D7_0112300
Pf3D7_01_v3	474444	T		706		1	0	0	11	5	6	1.2	1	1.45082	1.0845	rna_PF3D7_0112300-1	rna_PF3D7_0112300-1	Pf3D7_01_v3	473739	475887	PF3D7_0112300-1	18S+ribosomal+RNA	PF3D7_0112300-1	2149	PF3D7_0112300
Pf3D7_01_v3	474445	T		707		0	0	0	8	0	5	1	1	2.6737	2.22315	rna_PF3D7_0112300-1	rna_PF3D7_0112300-1	Pf3D7_01_v3	473739	475887	PF3D7_0112300-1	18S+ribosomal+RNA	PF3D7_0112300-1	2149	PF3D7_0112300
Pf3D7_01_v3	474446	G		708		0	0	2	7	2	6	1	1.40739	1.63189	1.63407	rna_PF3D7_0112300-1	rna_PF3D7_0112300-1	Pf3D7_01_v3	473739	475887	PF3D7_0112300-1	18S+ribosomal+RNA	PF3D7_0112300-1	2149	PF3D7_0112300
Pf3D7_01_v3	474447	T		709		0	0	3	7	6	24	1	1.61109	0.973872	2.71521	rna_PF3D7_0112300-1	rna_PF3D7_0112300-1	Pf3D7_01_v3	473739	475887	PF3D7_0112300-1	18S+ribosomal+RNA	PF3D7_0112300-1	2149	PF3D7_0112300
Pf3D7_01_v3	474448	T		710		0	0	0	4	1	5	1	1	1.46351	1.77129	rna_PF3D7_0112300-1	rna_PF3D7_0112300-1	Pf3D7_01_v3	473739	475887	PF3D7_0112300-1	18S+ribosomal+RNA	PF3D7_0112300-1	2149	PF3D7_0112300
Pf3D7_01_v3	474449	C		711		0	0	0	9	4	2	1	1	1.4269	0.737109	rna_PF3D7_0112300-1	rna_PF3D7_0112300-1	Pf3D7_01_v3	473739	475887	PF3D7_0112300-1	18S+ribosomal+RNA	PF3D7_0112300-1	2149	PF3D7_0112300
Pf3D7_01_v3	474450	A		712		0	0	0	6	8	4	1	1	0.741669	0.650655	rna_PF3D7_0112300-1	rna_PF3D7_0112300-1	Pf3D7_01_v3	473739	475887	PF3D7_0112300-1	18S+ribosomal+RNA	PF3D7_0112300-1	2149	PF3D7_0112300
Pf3D7_01_v3	474451	A		713		0	1	0	10	2	5	0.741745	0.741745	2.04749	1.47209	rna_PF3D7_0112300-1	rna_PF3D7_0112300-1	Pf3D7_01_v3	473739	475887	PF3D7_0112300-1	18S+ribosomal+RNA	PF3D7_0112300-1	2149	PF3D7_0112300
Pf3D7_01_v3	474452	A		714		5	0	2	26	7	14	2	1.40739	2.31163	1.5884	rna_PF3D7_0112300-1	rna_PF3D7_0112300-1	Pf3D7_01_v3	473739	475887	PF3D7_0112300-1	18S+ribosomal+RNA	PF3D7_0112300-1	2149	PF3D7_0112300
Pf3D7_01_v3	474453	A		715		1	1	1	18	8	4	0.890094	0.892835	1.56729	0.650655	rna_PF3D7_0112300-1	rna_PF3D7_0112300-1	Pf3D7_01_v3	473739	475887	PF3D7_0112300-1	18S+ribosomal+RNA	PF3D7_0112300-1	2149	PF3D7_0112300
Pf3D7_01_v3	474454	T		716		0	0	0	13	4	10	1	1	1.8411	1.70575	rna_PF3D7_0112300-1	rna_PF3D7_0112300-1	Pf3D7_01_v3	473739	475887	PF3D7_0112300-1	18S+ribosomal+RNA	PF3D7_0112300-1	2149	PF3D7_0112300
Pf3D7_01_v3	474455	A		717		1	2	0	19	5	7	0.707403	0.589503	2.18634	1.192	rna_PF3D7_0112300-1	rna_PF3D7_0112300-1	Pf3D7_01_v3	473739	475887	PF3D7_0112300-1	18S+ribosomal+RNA	PF3D7_0112300-1	2149	PF3D7_0112300
Pf3D7_01_v3	474456	A		718		0	0	0	5	0	1	1	1	2.04607	1.24463	rna_PF3D7_0112300-1	rna_PF3D7_0112300-1	Pf3D7_01_v3	473739	475887	PF3D7_0112300-1	18S+ribosomal+RNA	PF3D7_0112300-1	2149	PF3D7_0112300
Pf3D7_01_v3	474457	G		719		0	0	0	2	0	2	1	1	1.41843	1.48926	rna_PF3D7_0112300-1	rna_PF3D7_0112300-1	Pf3D7_01_v3	473739	475887	PF3D7_0112300-1	18S+ribosomal+RNA	PF3D7_0112300-1	2149	PF3D7_0112300
Pf3D7_01_v3	474458	G		720		0	1	0	4	9	1	0.741745	0.741745	0.557311	0.377628	rna_PF3D7_0112300-1	rna_PF3D7_0112300-1	Pf3D7_01_v3	473739	475887	PF3D7_0112300-1	18S+ribosomal+RNA	PF3D7_0112300-1	2149	PF3D7_0112300
Pf3D7_01_v3	474459	T		721		0	1	0	4	3	5	0.741745	0.741745	1.04053	1.25936	rna_PF3D7_0112300-1	rna_PF3D7_0112300-1	Pf3D7_01_v3	473739	475887	PF3D7_0112300-1	18S+ribosomal+RNA	PF3D7_0112300-1	2149	PF3D7_0112300
Pf3D7_01_v3	474460	T		722		0	0	0	5	5	1	1	1	0.899168	0.546968	rna_PF3D7_0112300-1	rna_PF3D7_0112300-1	Pf3D7_01_v3	473739	475887	PF3D7_0112300-1	18S+ribosomal+RNA	PF3D7_0112300-1	2149	PF3D7_0112300
Pf3D7_01_v3	474461	T		723		0	3	0	10	8	9	0.489113	0.489113	1.01688	1.0529	rna_PF3D7_0112300-1	rna_PF3D7_0112300-1	Pf3D7_01_v3	473739	475887	PF3D7_0112300-1	18S+ribosomal+RNA	PF3D7_0112300-1	2149	PF3D7_0112300
Pf3D7_01_v3	474462	T		724		0	1	0	4	0	2	0.741745	0.741745	1.83685	1.48926	rna_PF3D7_0112300-1	rna_PF3D7_0112300-1	Pf3D7_01_v3	473739	475887	PF3D7_0112300-1	18S+ribosomal+RNA	PF3D7_0112300-1	2149	PF3D7_0112300
Pf3D7_01_v3	474463	C		725		0	0	0	5	8	3	1	1	0.672867	0.570206	rna_PF3D7_0112300-1	rna_PF3D7_0112300-1	Pf3D7_01_v3	473739	475887	PF3D7_0112300-1	18S+ribosomal+RNA	PF3D7_0112300-1	2149	PF3D7_0112300
Pf3D7_01_v3	474464	T		726		0	0	0	19	1	7	1	1	3.96386	2.16111	rna_PF3D7_0112300-1	rna_PF3D7_0112300-1	Pf3D7_01_v3	473739	475887	PF3D7_0112300-1	18S+ribosomal+RNA	PF3D7_0112300-1	2149	PF3D7_0112300
Pf3D7_01_v3	474465	A		727		2	1	1	14	7	28	1.03844	0.892835	1.4104	2.81783	rna_PF3D7_0112300-1	rna_PF3D7_0112300-1	Pf3D7_01_v3	473739	475887	PF3D7_0112300-1	18S+ribosomal+RNA	PF3D7_0112300-1	2149	PF3D7_0112300
Pf3D7_01_v3	474466	A		728		0	0	0	2	3	4	1	1	0.803502	1.12078	rna_PF3D7_0112300-1	rna_PF3D7_0112300-1	Pf3D7_01_v3	473739	475887	PF3D7_0112300-1	18S+ribosomal+RNA	PF3D7_0112300-1	2149	PF3D7_0112300
Pf3D7_01_v3	474467	T		729		0	0	1	12	4	12	1	1.2037	1.73755	1.94791	rna_PF3D7_0112300-1	rna_PF3D7_0112300-1	Pf3D7_01_v3	473739	475887	PF3D7_0112300-1	18S+ribosomal+RNA	PF3D7_0112300-1	2149	PF3D7_0112300
Pf3D7_01_v3	474468	A		730		0	0	1	12	4	5	1	1.2037	1.73755	1.10035	rna_PF3D7_0112300-1	rna_PF3D7_0112300-1	Pf3D7_01_v3	473739	475887	PF3D7_0112300-1	18S+ribosomal+RNA	PF3D7_0112300-1	2149	PF3D7_0112300
Pf3D7_01_v3	474469	A		731		0	0	0	14	3	12	1	1	2.22567	2.2294	rna_PF3D7_0112300-1	rna_PF3D7_0112300-1	Pf3D7_01_v3	473739	475887	PF3D7_0112300-1	18S+ribosomal+RNA	PF3D7_0112300-1	2149	PF3D7_0112300
Pf3D7_01_v3	474470	A		732		0	0	1	11	13	17	1	1.2037	0.764851	1.19517	rna_PF3D7_0112300-1	rna_PF3D7_0112300-1	Pf3D7_01_v3	473739	475887	PF3D7_0112300-1	18S+ribosomal+RNA	PF3D7_0112300-1	2149	PF3D7_0112300
Pf3D7_01_v3	474471	T		733		1	0	0	9	0	11	1.2	1	2.88292	3.69094	rna_PF3D7_0112300-1	rna_PF3D7_0112300-1	Pf3D7_01_v3	473739	475887	PF3D7_0112300-1	18S+ribosomal+RNA	PF3D7_0112300-1	2149	PF3D7_0112300
Pf3D7_01_v3	474472	T		734		2	1	4	13	7	25	1.03844	1.3461	1.3353	2.55438	rna_PF3D7_0112300-1	rna_PF3D7_0112300-1	Pf3D7_01_v3	473739	475887	PF3D7_0112300-1	18S+ribosomal+RNA	PF3D7_0112300-1	2149	PF3D7_0112300
Pf3D7_01_v3	474473	A		735		0	1	0	9	4	8	0.741745	0.741745	1.4269	1.46359	rna_PF3D7_0112300-1	rna_PF3D7_0112300-1	Pf3D7_01_v3	473739	475887	PF3D7_0112300-1	18S+ribosomal+RNA	PF3D7_0112300-1	2149	PF3D7_0112300
Pf3D7_01_v3	474474	T		736		0	0	1	11	7	9	1	1.2037	1.1851	1.14932	rna_PF3D7_0112300-1	rna_PF3D7_0112300-1	Pf3D7_01_v3	473739	475887	PF3D7_0112300-1	18S+ribosomal+RNA	PF3D7_0112300-1	2149	PF3D7_0112300
Pf3D7_01_v3	474475	G		737		0	0	4	6	3	3	1	1.81478	1.27756	0.982205	rna_PF3D7_0112300-1	rna_PF3D7_0112300-1	Pf3D7_01_v3	473739	475887	PF3D7_0112300-1	18S+ribosomal+RNA	PF3D7_0112300-1	2149	PF3D7_0112300
Pf3D7_01_v3	474476	T		738		2	0	0	9	12	7	1.4	1	0.709864	0.667881	rna_PF3D7_0112300-1	rna_PF3D7_0112300-1	Pf3D7_01_v3	473739	475887	PF3D7_0112300-1	18S+ribosomal+RNA	PF3D7_0112300-1	2149	PF3D7_0112300
Pf3D7_01_v3	474477	T		739		0	0	1	6	1	1	1	1.2037	1.79689	0.991657	rna_PF3D7_0112300-1	rna_PF3D7_0112300-1	Pf3D7_01_v3	473739	475887	PF3D7_0112300-1	18S+ribosomal+RNA	PF3D7_0112300-1	2149	PF3D7_0112300
Pf3D7_01_v3	474478	T		740		0	0	0	10	2	10	1	1	2.04749	2.28201	rna_PF3D7_0112300-1	rna_PF3D7_0112300-1	Pf3D7_01_v3	473739	475887	PF3D7_0112300-1	18S+ribosomal+RNA	PF3D7_0112300-1	2149	PF3D7_0112300
Pf3D7_01_v3	474479	T		741		0	1	3	6	5	9	0.741745	1.19501	0.991109	1.40702	rna_PF3D7_0112300-1	rna_PF3D7_0112300-1	Pf3D7_01_v3	473739	475887	PF3D7_0112300-1	18S+ribosomal+RNA	PF3D7_0112300-1	2149	PF3D7_0112300
Pf3D7_01_v3	474480	T		742		1	1	3	16	7	18	0.890094	1.19501	1.56061	1.93967	rna_PF3D7_0112300-1	rna_PF3D7_0112300-1	Pf3D7_01_v3	473739	475887	PF3D7_0112300-1	18S+ribosomal+RNA	PF3D7_0112300-1	2149	PF3D7_0112300
Pf3D7_01_v3	474481	A		743		1	0	1	19	7	21	1.2	1.2037	1.78592	2.20311	rna_PF3D7_0112300-1	rna_PF3D7_0112300-1	Pf3D7_01_v3	473739	475887	PF3D7_0112300-1	18S+ribosomal+RNA	PF3D7_0112300-1	2149	PF3D7_0112300
Pf3D7_01_v3	474482	T		744		0	0	1	3	4	5	1	1.2037	0.805599	1.10035	rna_PF3D7_0112300-1	rna_PF3D7_0112300-1	Pf3D7_01_v3	473739	475887	PF3D7_0112300-1	18S+ribosomal+RNA	PF3D7_0112300-1	2149	PF3D7_0112300
Pf3D7_01_v3	474483	C		745		1	0	0	14	2	9	1.2	1	2.60162	2.12003	rna_PF3D7_0112300-1	rna_PF3D7_0112300-1	Pf3D7_01_v3	473739	475887	PF3D7_0112300-1	18S+ribosomal+RNA	PF3D7_0112300-1	2149	PF3D7_0112300
Pf3D7_01_v3	474484	A		746		0	0	0	1	3	2	1	1	0.684988	0.843628	rna_PF3D7_0112300-1	rna_PF3D7_0112300-1	Pf3D7_01_v3	473739	475887	PF3D7_0112300-1	18S+ribosomal+RNA	PF3D7_0112300-1	2149	PF3D7_0112300
Pf3D7_01_v3	474485	G		747		1	0	1	7	12	21	1.2	1.2037	0.606835	1.51118	rna_PF3D7_0112300-1	rna_PF3D7_0112300-1	Pf3D7_01_v3	473739	475887	PF3D7_0112300-1	18S+ribosomal+RNA	PF3D7_0112300-1	2149	PF3D7_0112300
Pf3D7_01_v3	474486	A		748		0	1	2	11	2	14	0.741745	1.04392	2.18603	2.92995	rna_PF3D7_0112300-1	rna_PF3D7_0112300-1	Pf3D7_01_v3	473739	475887	PF3D7_0112300-1	18S+ribosomal+RNA	PF3D7_0112300-1	2149	PF3D7_0112300
Pf3D7_01_v3	474487	T		749		0	0	0	4	9	0	1	1	0.557311	0.303406	rna_PF3D7_0112300-1	rna_PF3D7_0112300-1	Pf3D7_01_v3	473739	475887	PF3D7_0112300-1	18S+ribosomal+RNA	PF3D7_0112300-1	2149	PF3D7_0112300
Pf3D7_01_v3	474488	A		750		0	0	0	7	6	2	1	1	0.973872	0.588499	rna_PF3D7_0112300-1	rna_PF3D7_0112300-1	Pf3D7_01_v3	473739	475887	PF3D7_0112300-1	18S+ribosomal+RNA	PF3D7_0112300-1	2149	PF3D7_0112300
Pf3D7_01_v3	474489	T		751		0	0	2	5	0	3	1	1.40739	2.04607	1.73389	rna_PF3D7_0112300-1	rna_PF3D7_0112300-1	Pf3D7_01_v3	473739	475887	PF3D7_0112300-1	18S+ribosomal+RNA	PF3D7_0112300-1	2149	PF3D7_0112300
Pf3D7_01_v3	474490	G		752		2	0	4	9	3	18	1.4	1.81478	1.6331	3.06086	rna_PF3D7_0112300-1	rna_PF3D7_0112300-1	Pf3D7_01_v3	473739	475887	PF3D7_0112300-1	18S+ribosomal+RNA	PF3D7_0112300-1	2149	PF3D7_0112300
Pf3D7_01_v3	474491	A		753		0	0	0	6	4	2	1	1	1.11625	0.737109	rna_PF3D7_0112300-1	rna_PF3D7_0112300-1	Pf3D7_01_v3	473739	475887	PF3D7_0112300-1	18S+ribosomal+RNA	PF3D7_0112300-1	2149	PF3D7_0112300
Pf3D7_01_v3	474492	C		754		0	0	2	6	5	7	1	1.40739	0.991109	1.192	rna_PF3D7_0112300-1	rna_PF3D7_0112300-1	Pf3D7_01_v3	473739	475887	PF3D7_0112300-1	18S+ribosomal+RNA	PF3D7_0112300-1	2149	PF3D7_0112300
Pf3D7_01_v3	474493	A		755		0	0	0	7	1	2	1	1	1.96358	1.18657	rna_PF3D7_0112300-1	rna_PF3D7_0112300-1	Pf3D7_01_v3	473739	475887	PF3D7_0112300-1	18S+ribosomal+RNA	PF3D7_0112300-1	2149	PF3D7_0112300
Pf3D7_01_v3	474494	G		756		0	0	0	5	0	9	1	1	2.04607	3.20168	rna_PF3D7_0112300-1	rna_PF3D7_0112300-1	Pf3D7_01_v3	473739	475887	PF3D7_0112300-1	18S+ribosomal+RNA	PF3D7_0112300-1	2149	PF3D7_0112300
Pf3D7_01_v3	474495	A		757		3	0	0	17	3	17	1.6	1	2.58121	2.92228	rna_PF3D7_0112300-1	rna_PF3D7_0112300-1	Pf3D7_01_v3	473739	475887	PF3D7_0112300-1	18S+ribosomal+RNA	PF3D7_0112300-1	2149	PF3D7_0112300
Pf3D7_01_v3	474496	A		758		0	1	0	8	3	11	0.741745	0.741745	1.51458	2.09082	rna_PF3D7_0112300-1	rna_PF3D7_0112300-1	Pf3D7_01_v3	473739	475887	PF3D7_0112300-1	18S+ribosomal+RNA	PF3D7_0112300-1	2149	PF3D7_0112300
Pf3D7_01_v3	474497	T		759		0	1	0	7	4	1	0.741745	0.741745	1.2198	0.61603	rna_PF3D7_0112300-1	rna_PF3D7_0112300-1	Pf3D7_01_v3	473739	475887	PF3D7_0112300-1	18S+ribosomal+RNA	PF3D7_0112300-1	2149	PF3D7_0112300
Pf3D7_01_v3	474498	C		760		0	0	0	7	1	13	1	1	1.96358	3.33056	rna_PF3D7_0112300-1	rna_PF3D7_0112300-1	Pf3D7_01_v3	473739	475887	PF3D7_0112300-1	18S+ribosomal+RNA	PF3D7_0112300-1	2149	PF3D7_0112300
Pf3D7_01_v3	474499	T		761		0	0	0	3	5	2	1	1	0.715286	0.654474	rna_PF3D7_0112300-1	rna_PF3D7_0112300-1	Pf3D7_01_v3	473739	475887	PF3D7_0112300-1	18S+ribosomal+RNA	PF3D7_0112300-1	2149	PF3D7_0112300
Pf3D7_01_v3	474500	T		762		0	0	0	8	4	12	1	1	1.32335	1.94791	rna_PF3D7_0112300-1	rna_PF3D7_0112300-1	Pf3D7_01_v3	473739	475887	PF3D7_0112300-1	18S+ribosomal+RNA	PF3D7_0112300-1	2149	PF3D7_0112300
Pf3D7_01_v3	474501	T		763		0	0	0	3	7	4	1	1	0.584281	0.710239	rna_PF3D7_0112300-1	rna_PF3D7_0112300-1	Pf3D7_01_v3	473739	475887	PF3D7_0112300-1	18S+ribosomal+RNA	PF3D7_0112300-1	2149	PF3D7_0112300
Pf3D7_01_v3	474502	T		764		0	0	1	3	3	31	1	1.2037	0.922016	4.86236	rna_PF3D7_0112300-1	rna_PF3D7_0112300-1	Pf3D7_01_v3	473739	475887	PF3D7_0112300-1	18S+ribosomal+RNA	PF3D7_0112300-1	2149	PF3D7_0112300
Pf3D7_01_v3	474503	T		765		0	0	1	8	12	22	1	1.2037	0.65835	1.57142	rna_PF3D7_0112300-1	rna_PF3D7_0112300-1	Pf3D7_01_v3	473739	475887	PF3D7_0112300-1	18S+ribosomal+RNA	PF3D7_0112300-1	2149	PF3D7_0112300
Pf3D7_01_v3	474504	T		766		0	0	0	11	3	17	1	1	1.87013	2.92228	rna_PF3D7_0112300-1	rna_PF3D7_0112300-1	Pf3D7_01_v3	473739	475887	PF3D7_0112300-1	18S+ribosomal+RNA	PF3D7_0112300-1	2149	PF3D7_0112300
Pf3D7_01_v3	474505	A		767		0	0	2	14	8	10	1	1.40739	1.29208	1.13335	rna_PF3D7_0112300-1	rna_PF3D7_0112300-1	Pf3D7_01_v3	473739	475887	PF3D7_0112300-1	18S+ribosomal+RNA	PF3D7_0112300-1	2149	PF3D7_0112300
Pf3D7_01_v3	474506	A		768		0	0	0	9	1	6	1	1	2.29696	1.9662	rna_PF3D7_0112300-1	rna_PF3D7_0112300-1	Pf3D7_01_v3	473739	475887	PF3D7_0112300-1	18S+ribosomal+RNA	PF3D7_0112300-1	2149	PF3D7_0112300
Pf3D7_01_v3	474507	A		769		0	0	0	16	9	4	1	1	1.31903	0.600295	rna_PF3D7_0112300-1	rna_PF3D7_0112300-1	Pf3D7_01_v3	473739	475887	PF3D7_0112300-1	18S+ribosomal+RNA	PF3D7_0112300-1	2149	PF3D7_0112300
Pf3D7_01_v3	474508	A		770		0	0	0	11	0	1	1	1	3.30134	1.24463	rna_PF3D7_0112300-1	rna_PF3D7_0112300-1	Pf3D7_01_v3	473739	475887	PF3D7_0112300-1	18S+ribosomal+RNA	PF3D7_0112300-1	2149	PF3D7_0112300
Pf3D7_01_v3	474509	T		771		2	0	0	9	3	2	1.4	1	1.6331	0.843628	rna_PF3D7_0112300-1	rna_PF3D7_0112300-1	Pf3D7_01_v3	473739	475887	PF3D7_0112300-1	18S+ribosomal+RNA	PF3D7_0112300-1	2149	PF3D7_0112300
Pf3D7_01_v3	474510	C		772		0	0	3	4	14	1	1	1.61109	0.401812	0.272263	rna_PF3D7_0112300-1	rna_PF3D7_0112300-1	Pf3D7_01_v3	473739	475887	PF3D7_0112300-1	18S+ribosomal+RNA	PF3D7_0112300-1	2149	PF3D7_0112300
Pf3D7_01_v3	474511	T		773		0	1	0	1	0	1	0.741745	0.741745	1.20921	1.24463	rna_PF3D7_0112300-1	rna_PF3D7_0112300-1	Pf3D7_01_v3	473739	475887	PF3D7_0112300-1	18S+ribosomal+RNA	PF3D7_0112300-1	2149	PF3D7_0112300
Pf3D7_01_v3	474512	C		774		0	0	0	9	7	3	1	1	1.03489	0.622423	rna_PF3D7_0112300-1	rna_PF3D7_0112300-1	Pf3D7_01_v3	473739	475887	PF3D7_0112300-1	18S+ribosomal+RNA	PF3D7_0112300-1	2149	PF3D7_0112300
Pf3D7_01_v3	474513	T		775		1	0	1	12	13	14	1.2	1.2037	0.813321	1.02514	rna_PF3D7_0112300-1	rna_PF3D7_0112300-1	Pf3D7_01_v3	473739	475887	PF3D7_0112300-1	18S+ribosomal+RNA	PF3D7_0112300-1	2149	PF3D7_0112300
Pf3D7_01_v3	474514	T		776		0	1	0	6	3	1	0.741745	0.741745	1.27756	0.705051	rna_PF3D7_0112300-1	rna_PF3D7_0112300-1	Pf3D7_01_v3	473739	475887	PF3D7_0112300-1	18S+ribosomal+RNA	PF3D7_0112300-1	2149	PF3D7_0112300
Pf3D7_01_v3	474515	C		777		2	0	1	9	4	0	1.4	1.2037	1.4269	0.49495	rna_PF3D7_0112300-1	rna_PF3D7_0112300-1	Pf3D7_01_v3	473739	475887	PF3D7_0112300-1	18S+ribosomal+RNA	PF3D7_0112300-1	2149	PF3D7_0112300
Pf3D7_01_v3	474516	A		778		1	2	1	23	12	1	0.707403	0.709582	1.43107	0.306467	rna_PF3D7_0112300-1	rna_PF3D7_0112300-1	Pf3D7_01_v3	473739	475887	PF3D7_0112300-1	18S+ribosomal+RNA	PF3D7_0112300-1	2149	PF3D7_0112300
Pf3D7_01_v3	474517	A		779		0	0	0	10	6	2	1	1	1.22189	0.588499	rna_PF3D7_0112300-1	rna_PF3D7_0112300-1	Pf3D7_01_v3	473739	475887	PF3D7_0112300-1	18S+ribosomal+RNA	PF3D7_0112300-1	2149	PF3D7_0112300
Pf3D7_01_v3	474518	T		780		0	1	2	10	9	8	0.741745	1.04392	0.93817	0.897184	rna_PF3D7_0112300-1	rna_PF3D7_0112300-1	Pf3D7_01_v3	473739	475887	PF3D7_0112300-1	18S+ribosomal+RNA	PF3D7_0112300-1	2149	PF3D7_0112300
Pf3D7_01_v3	474519	A		781		0	0	0	1	6	2	1	1	0.477834	0.588499	rna_PF3D7_0112300-1	rna_PF3D7_0112300-1	Pf3D7_01_v3	473739	475887	PF3D7_0112300-1	18S+ribosomal+RNA	PF3D7_0112300-1	2149	PF3D7_0112300
Pf3D7_01_v3	474520	T		782		0	0	0	7	6	2	1	1	0.973872	0.588499	rna_PF3D7_0112300-1	rna_PF3D7_0112300-1	Pf3D7_01_v3	473739	475887	PF3D7_0112300-1	18S+ribosomal+RNA	PF3D7_0112300-1	2149	PF3D7_0112300
Pf3D7_01_v3	474521	G		783		0	0	0	2	2	0	1	1	0.939228	0.662162	rna_PF3D7_0112300-1	rna_PF3D7_0112300-1	Pf3D7_01_v3	473739	475887	PF3D7_0112300-1	18S+ribosomal+RNA	PF3D7_0112300-1	2149	PF3D7_0112300
Pf3D7_01_v3	474522	C		784		2	3	0	3	8	1	0.684758	0.489113	0.535264	0.409308	rna_PF3D7_0112300-1	rna_PF3D7_0112300-1	Pf3D7_01_v3	473739	475887	PF3D7_0112300-1	18S+ribosomal+RNA	PF3D7_0112300-1	2149	PF3D7_0112300
Pf3D7_01_v3	474523	T		785		1	1	1	4	9	3	0.890094	0.892835	0.557311	0.526073	rna_PF3D7_0112300-1	rna_PF3D7_0112300-1	Pf3D7_01_v3	473739	475887	PF3D7_0112300-1	18S+ribosomal+RNA	PF3D7_0112300-1	2149	PF3D7_0112300
Pf3D7_01_v3	474524	T		786		0	4	0	11	24	23	0.41794	0.41794	0.463513	0.930369	rna_PF3D7_0112300-1	rna_PF3D7_0112300-1	Pf3D7_01_v3	473739	475887	PF3D7_0112300-1	18S+ribosomal+RNA	PF3D7_0112300-1	2149	PF3D7_0112300
Pf3D7_01_v3	474525	T		787		0	0	0	5	5	10	1	1	0.899168	1.51452	rna_PF3D7_0112300-1	rna_PF3D7_0112300-1	Pf3D7_01_v3	473739	475887	PF3D7_0112300-1	18S+ribosomal+RNA	PF3D7_0112300-1	2149	PF3D7_0112300
Pf3D7_01_v3	474526	T		788		0	0	4	14	14	40	1	1.81478	0.859465	2.35927	rna_PF3D7_0112300-1	rna_PF3D7_0112300-1	Pf3D7_01_v3	473739	475887	PF3D7_0112300-1	18S+ribosomal+RNA	PF3D7_0112300-1	2149	PF3D7_0112300
Pf3D7_01_v3	474527	A		789		0	0	3	6	6	22	1	1.61109	0.891199	2.52187	rna_PF3D7_0112300-1	rna_PF3D7_0112300-1	Pf3D7_01_v3	473739	475887	PF3D7_0112300-1	18S+ribosomal+RNA	PF3D7_0112300-1	2149	PF3D7_0112300
Pf3D7_01_v3	474528	T		790		1	0	3	7	4	12	1.2	1.61109	1.2198	1.94791	rna_PF3D7_0112300-1	rna_PF3D7_0112300-1	Pf3D7_01_v3	473739	475887	PF3D7_0112300-1	18S+ribosomal+RNA	PF3D7_0112300-1	2149	PF3D7_0112300
Pf3D7_01_v3	474529	T		791		0	0	1	7	1	2	1	1.2037	1.96358	1.18657	rna_PF3D7_0112300-1	rna_PF3D7_0112300-1	Pf3D7_01_v3	473739	475887	PF3D7_0112300-1	18S+ribosomal+RNA	PF3D7_0112300-1	2149	PF3D7_0112300
Pf3D7_01_v3	474530	G		792		0	0	0	1	6	2	1	1	0.477834	0.588499	rna_PF3D7_0112300-1	rna_PF3D7_0112300-1	Pf3D7_01_v3	473739	475887	PF3D7_0112300-1	18S+ribosomal+RNA	PF3D7_0112300-1	2149	PF3D7_0112300
Pf3D7_01_v3	474531	C		793		0	0	1	3	4	1	1	1.2037	0.805599	0.61603	rna_PF3D7_0112300-1	rna_PF3D7_0112300-1	Pf3D7_01_v3	473739	475887	PF3D7_0112300-1	18S+ribosomal+RNA	PF3D7_0112300-1	2149	PF3D7_0112300
Pf3D7_01_v3	474532	T		794		0	0	0	8	7	1	1	1	0.959792	0.446791	rna_PF3D7_0112300-1	rna_PF3D7_0112300-1	Pf3D7_01_v3	473739	475887	PF3D7_0112300-1	18S+ribosomal+RNA	PF3D7_0112300-1	2149	PF3D7_0112300
Pf3D7_01_v3	474533	T		795		0	0	0	5	6	1	1	1	0.808526	0.49183	rna_PF3D7_0112300-1	rna_PF3D7_0112300-1	Pf3D7_01_v3	473739	475887	PF3D7_0112300-1	18S+ribosomal+RNA	PF3D7_0112300-1	2149	PF3D7_0112300
Pf3D7_01_v3	474534	T		796		2	1	0	1	10	6	1.03844	0.741745	0.340526	0.694951	rna_PF3D7_0112300-1	rna_PF3D7_0112300-1	Pf3D7_01_v3	473739	475887	PF3D7_0112300-1	18S+ribosomal+RNA	PF3D7_0112300-1	2149	PF3D7_0112300
Pf3D7_01_v3	474535	T		797		0	0	0	2	2	1	1	1	0.939228	0.824148	rna_PF3D7_0112300-1	rna_PF3D7_0112300-1	Pf3D7_01_v3	473739	475887	PF3D7_0112300-1	18S+ribosomal+RNA	PF3D7_0112300-1	2149	PF3D7_0112300
Pf3D7_01_v3	474536	G		798		0	0	0	11	2	2	1	1	2.18603	0.986133	rna_PF3D7_0112300-1	rna_PF3D7_0112300-1	Pf3D7_01_v3	473739	475887	PF3D7_0112300-1	18S+ribosomal+RNA	PF3D7_0112300-1	2149	PF3D7_0112300
Pf3D7_01_v3	474537	A		799		0	0	0	1	1	1	1	1	0.963438	0.991657	rna_PF3D7_0112300-1	rna_PF3D7_0112300-1	Pf3D7_01_v3	473739	475887	PF3D7_0112300-1	18S+ribosomal+RNA	PF3D7_0112300-1	2149	PF3D7_0112300
Pf3D7_01_v3	474538	G		800		0	0	0	6	1	1	1	1	1.79689	0.991657	rna_PF3D7_0112300-1	rna_PF3D7_0112300-1	Pf3D7_01_v3	473739	475887	PF3D7_0112300-1	18S+ribosomal+RNA	PF3D7_0112300-1	2149	PF3D7_0112300
Pf3D7_01_v3	474539	A		801		0	0	0	1	0	0	1	1	1.20921	1	rna_PF3D7_0112300-1	rna_PF3D7_0112300-1	Pf3D7_01_v3	473739	475887	PF3D7_0112300-1	18S+ribosomal+RNA	PF3D7_0112300-1	2149	PF3D7_0112300
Pf3D7_01_v3	474540	G		802		0	0	0	2	3	0	1	1	0.803502	0.566474	rna_PF3D7_0112300-1	rna_PF3D7_0112300-1	Pf3D7_01_v3	473739	475887	PF3D7_0112300-1	18S+ribosomal+RNA	PF3D7_0112300-1	2149	PF3D7_0112300
Pf3D7_01_v3	474541	G		803		0	1	0	6	11	2	0.741745	0.741745	0.59254	0.391281	rna_PF3D7_0112300-1	rna_PF3D7_0112300-1	Pf3D7_01_v3	473739	475887	PF3D7_0112300-1	18S+ribosomal+RNA	PF3D7_0112300-1	2149	PF3D7_0112300
Pf3D7_01_v3	474542	T		804		0	0	2	10	0	0	1	1.40739	3.09213	1	rna_PF3D7_0112300-1	rna_PF3D7_0112300-1	Pf3D7_01_v3	473739	475887	PF3D7_0112300-1	18S+ribosomal+RNA	PF3D7_0112300-1	2149	PF3D7_0112300
Pf3D7_01_v3	474543	T		805		0	1	0	9	5	2	0.741745	0.741745	1.26693	0.654474	rna_PF3D7_0112300-1	rna_PF3D7_0112300-1	Pf3D7_01_v3	473739	475887	PF3D7_0112300-1	18S+ribosomal+RNA	PF3D7_0112300-1	2149	PF3D7_0112300
Pf3D7_01_v3	474544	T		806		0	0	0	3	7	5	1	1	0.584281	0.798055	rna_PF3D7_0112300-1	rna_PF3D7_0112300-1	Pf3D7_01_v3	473739	475887	PF3D7_0112300-1	18S+ribosomal+RNA	PF3D7_0112300-1	2149	PF3D7_0112300
Pf3D7_01_v3	474545	T		807		0	0	0	5	3	10	1	1	1.15904	1.95224	rna_PF3D7_0112300-1	rna_PF3D7_0112300-1	Pf3D7_01_v3	473739	475887	PF3D7_0112300-1	18S+ribosomal+RNA	PF3D7_0112300-1	2149	PF3D7_0112300
Pf3D7_01_v3	474546	G		808		1	0	1	6	3	4	1.2	1.2037	1.27756	1.12078	rna_PF3D7_0112300-1	rna_PF3D7_0112300-1	Pf3D7_01_v3	473739	475887	PF3D7_0112300-1	18S+ribosomal+RNA	PF3D7_0112300-1	2149	PF3D7_0112300
Pf3D7_01_v3	474547	T		809		0	0	0	8	4	12	1	1	1.32335	1.94791	rna_PF3D7_0112300-1	rna_PF3D7_0112300-1	Pf3D7_01_v3	473739	475887	PF3D7_0112300-1	18S+ribosomal+RNA	PF3D7_0112300-1	2149	PF3D7_0112300
Pf3D7_01_v3	474548	T		810		0	0	3	7	5	20	1	1.61109	1.08305	2.58958	rna_PF3D7_0112300-1	rna_PF3D7_0112300-1	Pf3D7_01_v3	473739	475887	PF3D7_0112300-1	18S+ribosomal+RNA	PF3D7_0112300-1	2149	PF3D7_0112300
Pf3D7_01_v3	474549	A		811		0	0	0	3	3	6	1	1	0.922016	1.39794	rna_PF3D7_0112300-1	rna_PF3D7_0112300-1	Pf3D7_01_v3	473739	475887	PF3D7_0112300-1	18S+ribosomal+RNA	PF3D7_0112300-1	2149	PF3D7_0112300
Pf3D7_01_v3	474550	C		812		1	0	1	4	5	8	1.2	1.2037	0.807227	1.29951	rna_PF3D7_0112300-1	rna_PF3D7_0112300-1	Pf3D7_01_v3	473739	475887	PF3D7_0112300-1	18S+ribosomal+RNA	PF3D7_0112300-1	2149	PF3D7_0112300
Pf3D7_01_v3	474551	T		813		1	0	0	6	11	11	1.2	1	0.59254	0.969737	rna_PF3D7_0112300-1	rna_PF3D7_0112300-1	Pf3D7_01_v3	473739	475887	PF3D7_0112300-1	18S+ribosomal+RNA	PF3D7_0112300-1	2149	PF3D7_0112300
Pf3D7_01_v3	474552	T		814		0	0	0	9	0	7	1	1	2.88292	2.71241	rna_PF3D7_0112300-1	rna_PF3D7_0112300-1	Pf3D7_01_v3	473739	475887	PF3D7_0112300-1	18S+ribosomal+RNA	PF3D7_0112300-1	2149	PF3D7_0112300
Pf3D7_01_v3	474553	T		815		0	0	0	5	1	12	1	1	1.6302	3.13566	rna_PF3D7_0112300-1	rna_PF3D7_0112300-1	Pf3D7_01_v3	473739	475887	PF3D7_0112300-1	18S+ribosomal+RNA	PF3D7_0112300-1	2149	PF3D7_0112300
Pf3D7_01_v3	474554	G		816		1	0	1	3	0	11	1.2	1.2037	1.62764	3.69094	rna_PF3D7_0112300-1	rna_PF3D7_0112300-1	Pf3D7_01_v3	473739	475887	PF3D7_0112300-1	18S+ribosomal+RNA	PF3D7_0112300-1	2149	PF3D7_0112300
Pf3D7_01_v3	474555	A		817		0	1	0	2	0	8	0.741745	0.741745	1.41843	2.95704	rna_PF3D7_0112300-1	rna_PF3D7_0112300-1	Pf3D7_01_v3	473739	475887	PF3D7_0112300-1	18S+ribosomal+RNA	PF3D7_0112300-1	2149	PF3D7_0112300
Pf3D7_01_v3	474556	G		818		0	1	0	4	3	10	0.741745	0.741745	1.04053	1.95224	rna_PF3D7_0112300-1	rna_PF3D7_0112300-1	Pf3D7_01_v3	473739	475887	PF3D7_0112300-1	18S+ribosomal+RNA	PF3D7_0112300-1	2149	PF3D7_0112300
Pf3D7_01_v3	474557	T		819		1	0	0	11	3	5	1.2	1	1.87013	1.25936	rna_PF3D7_0112300-1	rna_PF3D7_0112300-1	Pf3D7_01_v3	473739	475887	PF3D7_0112300-1	18S+ribosomal+RNA	PF3D7_0112300-1	2149	PF3D7_0112300
Pf3D7_01_v3	474558	A		820		0	0	0	4	1	8	1	1	1.46351	2.35602	rna_PF3D7_0112300-1	rna_PF3D7_0112300-1	Pf3D7_01_v3	473739	475887	PF3D7_0112300-1	18S+ribosomal+RNA	PF3D7_0112300-1	2149	PF3D7_0112300
Pf3D7_01_v3	474559	A		821		0	2	1	6	5	6	0.589503	0.709582	0.991109	1.0845	rna_PF3D7_0112300-1	rna_PF3D7_0112300-1	Pf3D7_01_v3	473739	475887	PF3D7_0112300-1	18S+ribosomal+RNA	PF3D7_0112300-1	2149	PF3D7_0112300
Pf3D7_01_v3	474560	A		822		0	1	2	12	10	16	0.741745	1.04392	0.988606	1.38385	rna_PF3D7_0112300-1	rna_PF3D7_0112300-1	Pf3D7_01_v3	473739	475887	PF3D7_0112300-1	18S+ribosomal+RNA	PF3D7_0112300-1	2149	PF3D7_0112300
Pf3D7_01_v3	474561	A		823		4	1	0	8	14	13	1.33514	0.741745	0.584873	0.914419	rna_PF3D7_0112300-1	rna_PF3D7_0112300-1	Pf3D7_01_v3	473739	475887	PF3D7_0112300-1	18S+ribosomal+RNA	PF3D7_0112300-1	2149	PF3D7_0112300
Pf3D7_01_v3	474562	T		824		0	0	2	10	9	19	1	1.40739	0.93817	1.71363	rna_PF3D7_0112300-1	rna_PF3D7_0112300-1	Pf3D7_01_v3	473739	475887	PF3D7_0112300-1	18S+ribosomal+RNA	PF3D7_0112300-1	2149	PF3D7_0112300
Pf3D7_01_v3	474563	T		825		0	2	1	14	9	16	0.589503	0.709582	1.19208	1.49096	rna_PF3D7_0112300-1	rna_PF3D7_0112300-1	Pf3D7_01_v3	473739	475887	PF3D7_0112300-1	18S+ribosomal+RNA	PF3D7_0112300-1	2149	PF3D7_0112300
Pf3D7_01_v3	474564	A		826		0	0	0	9	4	10	1	1	1.4269	1.70575	rna_PF3D7_0112300-1	rna_PF3D7_0112300-1	Pf3D7_01_v3	473739	475887	PF3D7_0112300-1	18S+ribosomal+RNA	PF3D7_0112300-1	2149	PF3D7_0112300
Pf3D7_01_v3	474565	A		827		1	1	0	6	4	1	0.890094	0.741745	1.11625	0.61603	rna_PF3D7_0112300-1	rna_PF3D7_0112300-1	Pf3D7_01_v3	473739	475887	PF3D7_0112300-1	18S+ribosomal+RNA	PF3D7_0112300-1	2149	PF3D7_0112300
Pf3D7_01_v3	474566	G		828		0	0	0	6	3	10	1	1	1.27756	1.95224	rna_PF3D7_0112300-1	rna_PF3D7_0112300-1	Pf3D7_01_v3	473739	475887	PF3D7_0112300-1	18S+ribosomal+RNA	PF3D7_0112300-1	2149	PF3D7_0112300
Pf3D7_01_v3	474567	T		829		0	0	1	1	0	1	1	1.2037	1.20921	1.24463	rna_PF3D7_0112300-1	rna_PF3D7_0112300-1	Pf3D7_01_v3	473739	475887	PF3D7_0112300-1	18S+ribosomal+RNA	PF3D7_0112300-1	2149	PF3D7_0112300
Pf3D7_01_v3	474568	G		830		1	0	0	3	1	5	1.2	1	1.29682	1.77129	rna_PF3D7_0112300-1	rna_PF3D7_0112300-1	Pf3D7_01_v3	473739	475887	PF3D7_0112300-1	18S+ribosomal+RNA	PF3D7_0112300-1	2149	PF3D7_0112300
Pf3D7_01_v3	474569	T		831		0	1	1	12	10	18	0.741745	0.892835	0.988606	1.52163	rna_PF3D7_0112300-1	rna_PF3D7_0112300-1	Pf3D7_01_v3	473739	475887	PF3D7_0112300-1	18S+ribosomal+RNA	PF3D7_0112300-1	2149	PF3D7_0112300
Pf3D7_01_v3	474570	T		832		0	0	0	2	4	2	1	1	0.70205	0.737109	rna_PF3D7_0112300-1	rna_PF3D7_0112300-1	Pf3D7_01_v3	473739	475887	PF3D7_0112300-1	18S+ribosomal+RNA	PF3D7_0112300-1	2149	PF3D7_0112300
Pf3D7_01_v3	474571	C		833		1	3	0	10	14	18	0.586936	0.489113	0.676404	1.18198	rna_PF3D7_0112300-1	rna_PF3D7_0112300-1	Pf3D7_01_v3	473739	475887	PF3D7_0112300-1	18S+ribosomal+RNA	PF3D7_0112300-1	2149	PF3D7_0112300
Pf3D7_01_v3	474572	A		834		0	0	0	13	4	11	1	1	1.8411	1.82683	rna_PF3D7_0112300-1	rna_PF3D7_0112300-1	Pf3D7_01_v3	473739	475887	PF3D7_0112300-1	18S+ribosomal+RNA	PF3D7_0112300-1	2149	PF3D7_0112300
Pf3D7_01_v3	474573	T		835		1	0	1	4	5	9	1.2	1.2037	0.807227	1.40702	rna_PF3D7_0112300-1	rna_PF3D7_0112300-1	Pf3D7_01_v3	473739	475887	PF3D7_0112300-1	18S+ribosomal+RNA	PF3D7_0112300-1	2149	PF3D7_0112300
Pf3D7_01_v3	474574	A		836		3	0	3	9	6	23	1.6	1.61109	1.13922	2.61854	rna_PF3D7_0112300-1	rna_PF3D7_0112300-1	Pf3D7_01_v3	473739	475887	PF3D7_0112300-1	18S+ribosomal+RNA	PF3D7_0112300-1	2149	PF3D7_0112300
Pf3D7_01_v3	474575	A		837		0	0	0	14	2	5	1	1	2.60162	1.47209	rna_PF3D7_0112300-1	rna_PF3D7_0112300-1	Pf3D7_01_v3	473739	475887	PF3D7_0112300-1	18S+ribosomal+RNA	PF3D7_0112300-1	2149	PF3D7_0112300
Pf3D7_01_v3	474576	C		838		0	0	0	3	3	4	1	1	0.922016	1.12078	rna_PF3D7_0112300-1	rna_PF3D7_0112300-1	Pf3D7_01_v3	473739	475887	PF3D7_0112300-1	18S+ribosomal+RNA	PF3D7_0112300-1	2149	PF3D7_0112300
Pf3D7_01_v3	474577	A		839		1	0	0	2	1	0	1.2	1	1.13013	0.796748	rna_PF3D7_0112300-1	rna_PF3D7_0112300-1	Pf3D7_01_v3	473739	475887	PF3D7_0112300-1	18S+ribosomal+RNA	PF3D7_0112300-1	2149	PF3D7_0112300
Pf3D7_01_v3	474578	G		840		0	1	1	7	6	4	0.741745	0.892835	0.973872	0.781836	rna_PF3D7_0112300-1	rna_PF3D7_0112300-1	Pf3D7_01_v3	473739	475887	PF3D7_0112300-1	18S+ribosomal+RNA	PF3D7_0112300-1	2149	PF3D7_0112300
Pf3D7_01_v3	474579	A		841		0	0	0	5	2	1	1	1	1.35483	0.824148	rna_PF3D7_0112300-1	rna_PF3D7_0112300-1	Pf3D7_01_v3	473739	475887	PF3D7_0112300-1	18S+ribosomal+RNA	PF3D7_0112300-1	2149	PF3D7_0112300
Pf3D7_01_v3	474580	C		842		0	0	0	0	1	3	1	1	0.796748	1.38148	rna_PF3D7_0112300-1	rna_PF3D7_0112300-1	Pf3D7_01_v3	473739	475887	PF3D7_0112300-1	18S+ribosomal+RNA	PF3D7_0112300-1	2149	PF3D7_0112300
Pf3D7_01_v3	474581	G		843		0	0	0	0	1	1	1	1	0.796748	0.991657	rna_PF3D7_0112300-1	rna_PF3D7_0112300-1	Pf3D7_01_v3	473739	475887	PF3D7_0112300-1	18S+ribosomal+RNA	PF3D7_0112300-1	2149	PF3D7_0112300
Pf3D7_01_v3	474582	G		844		0	0	0	2	0	1	1	1	1.41843	1.24463	rna_PF3D7_0112300-1	rna_PF3D7_0112300-1	Pf3D7_01_v3	473739	475887	PF3D7_0112300-1	18S+ribosomal+RNA	PF3D7_0112300-1	2149	PF3D7_0112300
Pf3D7_01_v3	474583	G		845		0	1	1	5	6	8	0.741745	0.892835	0.808526	1.16851	rna_PF3D7_0112300-1	rna_PF3D7_0112300-1	Pf3D7_01_v3	473739	475887	PF3D7_0112300-1	18S+ribosomal+RNA	PF3D7_0112300-1	2149	PF3D7_0112300
Pf3D7_01_v3	474584	T		846		0	0	0	3	1	5	1	1	1.29682	1.77129	rna_PF3D7_0112300-1	rna_PF3D7_0112300-1	Pf3D7_01_v3	473739	475887	PF3D7_0112300-1	18S+ribosomal+RNA	PF3D7_0112300-1	2149	PF3D7_0112300
Pf3D7_01_v3	474585	A		847		0	0	0	1	1	8	1	1	0.963438	2.35602	rna_PF3D7_0112300-1	rna_PF3D7_0112300-1	Pf3D7_01_v3	473739	475887	PF3D7_0112300-1	18S+ribosomal+RNA	PF3D7_0112300-1	2149	PF3D7_0112300
Pf3D7_01_v3	474586	G		848		0	0	1	10	11	11	1	1.2037	0.81241	0.969737	rna_PF3D7_0112300-1	rna_PF3D7_0112300-1	Pf3D7_01_v3	473739	475887	PF3D7_0112300-1	18S+ribosomal+RNA	PF3D7_0112300-1	2149	PF3D7_0112300
Pf3D7_01_v3	474587	T		849		0	0	0	7	4	0	1	1	1.2198	0.49495	rna_PF3D7_0112300-1	rna_PF3D7_0112300-1	Pf3D7_01_v3	473739	475887	PF3D7_0112300-1	18S+ribosomal+RNA	PF3D7_0112300-1	2149	PF3D7_0112300
Pf3D7_01_v3	474588	C		850		0	0	0	9	7	8	1	1	1.03489	1.0615	rna_PF3D7_0112300-1	rna_PF3D7_0112300-1	Pf3D7_01_v3	473739	475887	PF3D7_0112300-1	18S+ribosomal+RNA	PF3D7_0112300-1	2149	PF3D7_0112300
Pf3D7_01_v3	474589	A		851		0	0	0	5	2	3	1	1	1.35483	1.14812	rna_PF3D7_0112300-1	rna_PF3D7_0112300-1	Pf3D7_01_v3	473739	475887	PF3D7_0112300-1	18S+ribosomal+RNA	PF3D7_0112300-1	2149	PF3D7_0112300
Pf3D7_01_v3	474590	T		852		0	0	0	0	1	1	1	1	0.796748	0.991657	rna_PF3D7_0112300-1	rna_PF3D7_0112300-1	Pf3D7_01_v3	473739	475887	PF3D7_0112300-1	18S+ribosomal+RNA	PF3D7_0112300-1	2149	PF3D7_0112300
Pf3D7_01_v3	474591	G		853		0	0	2	5	5	9	1	1.40739	0.899168	1.40702	rna_PF3D7_0112300-1	rna_PF3D7_0112300-1	Pf3D7_01_v3	473739	475887	PF3D7_0112300-1	18S+ribosomal+RNA	PF3D7_0112300-1	2149	PF3D7_0112300
Pf3D7_01_v3	474592	A		854		0	0	0	4	4	8	1	1	0.909149	1.46359	rna_PF3D7_0112300-1	rna_PF3D7_0112300-1	Pf3D7_01_v3	473739	475887	PF3D7_0112300-1	18S+ribosomal+RNA	PF3D7_0112300-1	2149	PF3D7_0112300
Pf3D7_01_v3	474593	T		855		0	0	0	3	0	6	1	1	1.62764	2.46778	rna_PF3D7_0112300-1	rna_PF3D7_0112300-1	Pf3D7_01_v3	473739	475887	PF3D7_0112300-1	18S+ribosomal+RNA	PF3D7_0112300-1	2149	PF3D7_0112300
Pf3D7_01_v3	474594	T		856		0	0	0	1	0	1	1	1	1.20921	1.24463	rna_PF3D7_0112300-1	rna_PF3D7_0112300-1	Pf3D7_01_v3	473739	475887	PF3D7_0112300-1	18S+ribosomal+RNA	PF3D7_0112300-1	2149	PF3D7_0112300
Pf3D7_01_v3	474595	G		857		0	0	2	5	7	2	1	1.40739	0.734485	0.534607	rna_PF3D7_0112300-1	rna_PF3D7_0112300-1	Pf3D7_01_v3	473739	475887	PF3D7_0112300-1	18S+ribosomal+RNA	PF3D7_0112300-1	2149	PF3D7_0112300
Pf3D7_01_v3	474596	A		858		0	0	0	2	2	3	1	1	0.939228	1.14812	rna_PF3D7_0112300-1	rna_PF3D7_0112300-1	Pf3D7_01_v3	473739	475887	PF3D7_0112300-1	18S+ribosomal+RNA	PF3D7_0112300-1	2149	PF3D7_0112300
Pf3D7_01_v3	474597	G		859		0	0	3	6	0	24	1	1.61109	2.25528	6.87113	rna_PF3D7_0112300-1	rna_PF3D7_0112300-1	Pf3D7_01_v3	473739	475887	PF3D7_0112300-1	18S+ribosomal+RNA	PF3D7_0112300-1	2149	PF3D7_0112300
Pf3D7_01_v3	474598	T		860		0	0	2	16	4	5	1	1.40739	2.15175	1.10035	rna_PF3D7_0112300-1	rna_PF3D7_0112300-1	Pf3D7_01_v3	473739	475887	PF3D7_0112300-1	18S+ribosomal+RNA	PF3D7_0112300-1	2149	PF3D7_0112300
Pf3D7_01_v3	474599	T		861		0	0	2	2	0	0	1	1.40739	1.41843	1	rna_PF3D7_0112300-1	rna_PF3D7_0112300-1	Pf3D7_01_v3	473739	475887	PF3D7_0112300-1	18S+ribosomal+RNA	PF3D7_0112300-1	2149	PF3D7_0112300
Pf3D7_01_v3	474600	C		862		0	0	0	5	0	8	1	1	2.04607	2.95704	rna_PF3D7_0112300-1	rna_PF3D7_0112300-1	Pf3D7_01_v3	473739	475887	PF3D7_0112300-1	18S+ribosomal+RNA	PF3D7_0112300-1	2149	PF3D7_0112300
Pf3D7_01_v3	474601	A		863		0	0	0	4	6	4	1	1	0.725853	0.781836	rna_PF3D7_0112300-1	rna_PF3D7_0112300-1	Pf3D7_01_v3	473739	475887	PF3D7_0112300-1	18S+ribosomal+RNA	PF3D7_0112300-1	2149	PF3D7_0112300
Pf3D7_01_v3	474602	T		864		0	0	0	5	1	5	1	1	1.6302	1.77129	rna_PF3D7_0112300-1	rna_PF3D7_0112300-1	Pf3D7_01_v3	473739	475887	PF3D7_0112300-1	18S+ribosomal+RNA	PF3D7_0112300-1	2149	PF3D7_0112300
Pf3D7_01_v3	474603	T		865		0	0	0	3	4	2	1	1	0.805599	0.737109	rna_PF3D7_0112300-1	rna_PF3D7_0112300-1	Pf3D7_01_v3	473739	475887	PF3D7_0112300-1	18S+ribosomal+RNA	PF3D7_0112300-1	2149	PF3D7_0112300
Pf3D7_01_v3	474604	G		866		0	0	1	1	1	4	1	1.2037	0.963438	1.57638	rna_PF3D7_0112300-1	rna_PF3D7_0112300-1	Pf3D7_01_v3	473739	475887	PF3D7_0112300-1	18S+ribosomal+RNA	PF3D7_0112300-1	2149	PF3D7_0112300
Pf3D7_01_v3	474605	T		867		0	1	0	3	0	1	0.741745	0.741745	1.62764	1.24463	rna_PF3D7_0112300-1	rna_PF3D7_0112300-1	Pf3D7_01_v3	473739	475887	PF3D7_0112300-1	18S+ribosomal+RNA	PF3D7_0112300-1	2149	PF3D7_0112300
Pf3D7_01_v3	474606	G		868		0	0	2	2	3	6	1	1.40739	0.803502	1.39794	rna_PF3D7_0112300-1	rna_PF3D7_0112300-1	Pf3D7_01_v3	473739	475887	PF3D7_0112300-1	18S+ribosomal+RNA	PF3D7_0112300-1	2149	PF3D7_0112300
Pf3D7_01_v3	474607	T		869		0	0	0	8	3	3	1	1	1.51458	0.982205	rna_PF3D7_0112300-1	rna_PF3D7_0112300-1	Pf3D7_01_v3	473739	475887	PF3D7_0112300-1	18S+ribosomal+RNA	PF3D7_0112300-1	2149	PF3D7_0112300
Pf3D7_01_v3	474608	T		870		0	0	2	6	1	9	1	1.40739	1.79689	2.55093	rna_PF3D7_0112300-1	rna_PF3D7_0112300-1	Pf3D7_01_v3	473739	475887	PF3D7_0112300-1	18S+ribosomal+RNA	PF3D7_0112300-1	2149	PF3D7_0112300
Pf3D7_01_v3	474609	T		871		0	0	0	2	0	5	1	1	1.41843	2.22315	rna_PF3D7_0112300-1	rna_PF3D7_0112300-1	Pf3D7_01_v3	473739	475887	PF3D7_0112300-1	18S+ribosomal+RNA	PF3D7_0112300-1	2149	PF3D7_0112300
Pf3D7_01_v3	474610	G		872		0	0	0	12	1	6	1	1	2.79703	1.9662	rna_PF3D7_0112300-1	rna_PF3D7_0112300-1	Pf3D7_01_v3	473739	475887	PF3D7_0112300-1	18S+ribosomal+RNA	PF3D7_0112300-1	2149	PF3D7_0112300
Pf3D7_01_v3	474611	A		873		1	0	1	8	1	13	1.2	1.2037	2.13027	3.33056	rna_PF3D7_0112300-1	rna_PF3D7_0112300-1	Pf3D7_01_v3	473739	475887	PF3D7_0112300-1	18S+ribosomal+RNA	PF3D7_0112300-1	2149	PF3D7_0112300
Pf3D7_01_v3	474612	A		874		0	0	0	4	0	4	1	1	1.83685	1.97852	rna_PF3D7_0112300-1	rna_PF3D7_0112300-1	Pf3D7_01_v3	473739	475887	PF3D7_0112300-1	18S+ribosomal+RNA	PF3D7_0112300-1	2149	PF3D7_0112300
Pf3D7_01_v3	474613	T		875		0	2	2	8	7	14	0.589503	0.829661	0.959792	1.5884	rna_PF3D7_0112300-1	rna_PF3D7_0112300-1	Pf3D7_01_v3	473739	475887	PF3D7_0112300-1	18S+ribosomal+RNA	PF3D7_0112300-1	2149	PF3D7_0112300
Pf3D7_01_v3	474614	A		876		0	0	0	3	1	1	1	1	1.29682	0.991657	rna_PF3D7_0112300-1	rna_PF3D7_0112300-1	Pf3D7_01_v3	473739	475887	PF3D7_0112300-1	18S+ribosomal+RNA	PF3D7_0112300-1	2149	PF3D7_0112300
Pf3D7_01_v3	474615	C		877		0	0	0	5	1	1	1	1	1.6302	0.991657	rna_PF3D7_0112300-1	rna_PF3D7_0112300-1	Pf3D7_01_v3	473739	475887	PF3D7_0112300-1	18S+ribosomal+RNA	PF3D7_0112300-1	2149	PF3D7_0112300
Pf3D7_01_v3	474616	T		878		0	0	0	6	6	3	1	1	0.891199	0.685167	rna_PF3D7_0112300-1	rna_PF3D7_0112300-1	Pf3D7_01_v3	473739	475887	PF3D7_0112300-1	18S+ribosomal+RNA	PF3D7_0112300-1	2149	PF3D7_0112300
Pf3D7_01_v3	474617	A		879		0	0	0	5	0	5	1	1	2.04607	2.22315	rna_PF3D7_0112300-1	rna_PF3D7_0112300-1	Pf3D7_01_v3	473739	475887	PF3D7_0112300-1	18S+ribosomal+RNA	PF3D7_0112300-1	2149	PF3D7_0112300
Pf3D7_01_v3	474618	C		880		0	0	0	6	3	3	1	1	1.27756	0.982205	rna_PF3D7_0112300-1	rna_PF3D7_0112300-1	Pf3D7_01_v3	473739	475887	PF3D7_0112300-1	18S+ribosomal+RNA	PF3D7_0112300-1	2149	PF3D7_0112300
Pf3D7_01_v3	474619	A		881		0	0	7	2	2	4	1	2.42587	0.939228	1.3101	rna_PF3D7_0112300-1	rna_PF3D7_0112300-1	Pf3D7_01_v3	473739	475887	PF3D7_0112300-1	18S+ribosomal+RNA	PF3D7_0112300-1	2149	PF3D7_0112300
Pf3D7_01_v3	474620	G		882		0	0	0	1	0	0	1	1	1.20921	1	rna_PF3D7_0112300-1	rna_PF3D7_0112300-1	Pf3D7_01_v3	473739	475887	PF3D7_0112300-1	18S+ribosomal+RNA	PF3D7_0112300-1	2149	PF3D7_0112300
Pf3D7_01_v3	474621	C		883		0	0	0	3	5	10	1	1	0.715286	1.51452	rna_PF3D7_0112300-1	rna_PF3D7_0112300-1	Pf3D7_01_v3	473739	475887	PF3D7_0112300-1	18S+ribosomal+RNA	PF3D7_0112300-1	2149	PF3D7_0112300
Pf3D7_01_v3	474622	A		884		0	0	0	3	0	5	1	1	1.62764	2.22315	rna_PF3D7_0112300-1	rna_PF3D7_0112300-1	Pf3D7_01_v3	473739	475887	PF3D7_0112300-1	18S+ribosomal+RNA	PF3D7_0112300-1	2149	PF3D7_0112300
Pf3D7_01_v3	474623	T		885		0	0	0	6	1	0	1	1	1.79689	0.796748	rna_PF3D7_0112300-1	rna_PF3D7_0112300-1	Pf3D7_01_v3	473739	475887	PF3D7_0112300-1	18S+ribosomal+RNA	PF3D7_0112300-1	2149	PF3D7_0112300
Pf3D7_01_v3	474624	G		886		0	0	1	6	2	0	1	1.2037	1.49336	0.662162	rna_PF3D7_0112300-1	rna_PF3D7_0112300-1	Pf3D7_01_v3	473739	475887	PF3D7_0112300-1	18S+ribosomal+RNA	PF3D7_0112300-1	2149	PF3D7_0112300
Pf3D7_01_v3	474625	G		887		0	0	0	4	0	3	1	1	1.83685	1.73389	rna_PF3D7_0112300-1	rna_PF3D7_0112300-1	Pf3D7_01_v3	473739	475887	PF3D7_0112300-1	18S+ribosomal+RNA	PF3D7_0112300-1	2149	PF3D7_0112300
Pf3D7_01_v3	474626	A		888		0	0	0	4	4	8	1	1	0.909149	1.46359	rna_PF3D7_0112300-1	rna_PF3D7_0112300-1	Pf3D7_01_v3	473739	475887	PF3D7_0112300-1	18S+ribosomal+RNA	PF3D7_0112300-1	2149	PF3D7_0112300
Pf3D7_01_v3	474627	A		889		0	1	0	8	5	1	0.741745	0.741745	1.17499	0.546968	rna_PF3D7_0112300-1	rna_PF3D7_0112300-1	Pf3D7_01_v3	473739	475887	PF3D7_0112300-1	18S+ribosomal+RNA	PF3D7_0112300-1	2149	PF3D7_0112300
Pf3D7_01_v3	474628	T		890		0	0	0	3	7	9	1	1	0.584281	1.14932	rna_PF3D7_0112300-1	rna_PF3D7_0112300-1	Pf3D7_01_v3	473739	475887	PF3D7_0112300-1	18S+ribosomal+RNA	PF3D7_0112300-1	2149	PF3D7_0112300
Pf3D7_01_v3	474629	A		891		1	0	0	7	5	8	1.2	1	1.08305	1.29951	rna_PF3D7_0112300-1	rna_PF3D7_0112300-1	Pf3D7_01_v3	473739	475887	PF3D7_0112300-1	18S+ribosomal+RNA	PF3D7_0112300-1	2149	PF3D7_0112300
Pf3D7_01_v3	474630	A		892		0	0	0	6	1	2	1	1	1.79689	1.18657	rna_PF3D7_0112300-1	rna_PF3D7_0112300-1	Pf3D7_01_v3	473739	475887	PF3D7_0112300-1	18S+ribosomal+RNA	PF3D7_0112300-1	2149	PF3D7_0112300
Pf3D7_01_v3	474631	C		893		0	3	0	0	3	6	0.489113	0.489113	0.566474	1.39794	rna_PF3D7_0112300-1	rna_PF3D7_0112300-1	Pf3D7_01_v3	473739	475887	PF3D7_0112300-1	18S+ribosomal+RNA	PF3D7_0112300-1	2149	PF3D7_0112300
Pf3D7_01_v3	474632	A		894		0	0	1	8	0	4	1	1.2037	2.6737	1.97852	rna_PF3D7_0112300-1	rna_PF3D7_0112300-1	Pf3D7_01_v3	473739	475887	PF3D7_0112300-1	18S+ribosomal+RNA	PF3D7_0112300-1	2149	PF3D7_0112300
Pf3D7_01_v3	474633	A		895		0	0	0	6	11	9	1	1	0.59254	0.841191	rna_PF3D7_0112300-1	rna_PF3D7_0112300-1	Pf3D7_01_v3	473739	475887	PF3D7_0112300-1	18S+ribosomal+RNA	PF3D7_0112300-1	2149	PF3D7_0112300
Pf3D7_01_v3	474634	A		896		0	0	0	4	0	6	1	1	1.83685	2.46778	rna_PF3D7_0112300-1	rna_PF3D7_0112300-1	Pf3D7_01_v3	473739	475887	PF3D7_0112300-1	18S+ribosomal+RNA	PF3D7_0112300-1	2149	PF3D7_0112300
Pf3D7_01_v3	474635	T		897		0	0	8	3	3	5	1	2.62956	0.922016	1.25936	rna_PF3D7_0112300-1	rna_PF3D7_0112300-1	Pf3D7_01_v3	473739	475887	PF3D7_0112300-1	18S+ribosomal+RNA	PF3D7_0112300-1	2149	PF3D7_0112300
Pf3D7_01_v3	474636	A		898		0	0	0	7	3	6	1	1	1.39607	1.39794	rna_PF3D7_0112300-1	rna_PF3D7_0112300-1	Pf3D7_01_v3	473739	475887	PF3D7_0112300-1	18S+ribosomal+RNA	PF3D7_0112300-1	2149	PF3D7_0112300
Pf3D7_01_v3	474637	T		899		0	0	0	2	3	4	1	1	0.803502	1.12078	rna_PF3D7_0112300-1	rna_PF3D7_0112300-1	Pf3D7_01_v3	473739	475887	PF3D7_0112300-1	18S+ribosomal+RNA	PF3D7_0112300-1	2149	PF3D7_0112300
Pf3D7_01_v3	474638	G		900		0	2	1	6	0	6	0.589503	0.709582	2.25528	2.46778	rna_PF3D7_0112300-1	rna_PF3D7_0112300-1	Pf3D7_01_v3	473739	475887	PF3D7_0112300-1	18S+ribosomal+RNA	PF3D7_0112300-1	2149	PF3D7_0112300
Pf3D7_01_v3	474639	A		901		1	1	3	6	10	5	0.890094	1.19501	0.635107	0.626061	rna_PF3D7_0112300-1	rna_PF3D7_0112300-1	Pf3D7_01_v3	473739	475887	PF3D7_0112300-1	18S+ribosomal+RNA	PF3D7_0112300-1	2149	PF3D7_0112300
Pf3D7_01_v3	474640	A		902		0	0	1	3	3	5	1	1.2037	0.922016	1.25936	rna_PF3D7_0112300-1	rna_PF3D7_0112300-1	Pf3D7_01_v3	473739	475887	PF3D7_0112300-1	18S+ribosomal+RNA	PF3D7_0112300-1	2149	PF3D7_0112300
Pf3D7_01_v3	474641	T		903		0	0	0	1	1	7	1	1	0.963438	2.16111	rna_PF3D7_0112300-1	rna_PF3D7_0112300-1	Pf3D7_01_v3	473739	475887	PF3D7_0112300-1	18S+ribosomal+RNA	PF3D7_0112300-1	2149	PF3D7_0112300
Pf3D7_01_v3	474642	A		904		1	0	1	8	1	9	1.2	1.2037	2.13027	2.55093	rna_PF3D7_0112300-1	rna_PF3D7_0112300-1	Pf3D7_01_v3	473739	475887	PF3D7_0112300-1	18S+ribosomal+RNA	PF3D7_0112300-1	2149	PF3D7_0112300
Pf3D7_01_v3	474643	A		905		0	0	0	2	0	1	1	1	1.41843	1.24463	rna_PF3D7_0112300-1	rna_PF3D7_0112300-1	Pf3D7_01_v3	473739	475887	PF3D7_0112300-1	18S+ribosomal+RNA	PF3D7_0112300-1	2149	PF3D7_0112300
Pf3D7_01_v3	474644	G		906		0	0	0	2	0	0	1	1	1.41843	1	rna_PF3D7_0112300-1	rna_PF3D7_0112300-1	Pf3D7_01_v3	473739	475887	PF3D7_0112300-1	18S+ribosomal+RNA	PF3D7_0112300-1	2149	PF3D7_0112300
Pf3D7_01_v3	474645	C		907		0	0	0	2	2	5	1	1	0.939228	1.47209	rna_PF3D7_0112300-1	rna_PF3D7_0112300-1	Pf3D7_01_v3	473739	475887	PF3D7_0112300-1	18S+ribosomal+RNA	PF3D7_0112300-1	2149	PF3D7_0112300
Pf3D7_01_v3	474646	T		908		0	1	3	6	1	8	0.741745	1.19501	1.79689	2.35602	rna_PF3D7_0112300-1	rna_PF3D7_0112300-1	Pf3D7_01_v3	473739	475887	PF3D7_0112300-1	18S+ribosomal+RNA	PF3D7_0112300-1	2149	PF3D7_0112300
Pf3D7_01_v3	474647	A		909		2	0	0	15	4	9	1.4	1	2.0482	1.58467	rna_PF3D7_0112300-1	rna_PF3D7_0112300-1	Pf3D7_01_v3	473739	475887	PF3D7_0112300-1	18S+ribosomal+RNA	PF3D7_0112300-1	2149	PF3D7_0112300
Pf3D7_01_v3	474648	A		910		0	0	6	6	2	6	1	2.22217	1.49336	1.63407	rna_PF3D7_0112300-1	rna_PF3D7_0112300-1	Pf3D7_01_v3	473739	475887	PF3D7_0112300-1	18S+ribosomal+RNA	PF3D7_0112300-1	2149	PF3D7_0112300
Pf3D7_01_v3	474649	T		911		0	1	2	7	5	11	0.741745	1.04392	1.08305	1.62203	rna_PF3D7_0112300-1	rna_PF3D7_0112300-1	Pf3D7_01_v3	473739	475887	PF3D7_0112300-1	18S+ribosomal+RNA	PF3D7_0112300-1	2149	PF3D7_0112300
Pf3D7_01_v3	474650	T		912		2	2	0	10	10	20	0.825304	0.589503	0.870773	1.65941	rna_PF3D7_0112300-1	rna_PF3D7_0112300-1	Pf3D7_01_v3	473739	475887	PF3D7_0112300-1	18S+ribosomal+RNA	PF3D7_0112300-1	2149	PF3D7_0112300
Pf3D7_01_v3	474651	A		913		0	0	0	12	11	10	1	1	0.922345	0.905464	rna_PF3D7_0112300-1	rna_PF3D7_0112300-1	Pf3D7_01_v3	473739	475887	PF3D7_0112300-1	18S+ribosomal+RNA	PF3D7_0112300-1	2149	PF3D7_0112300
Pf3D7_01_v3	474652	T		914		0	0	0	3	2	8	1	1	1.07776	1.95804	rna_PF3D7_0112300-1	rna_PF3D7_0112300-1	Pf3D7_01_v3	473739	475887	PF3D7_0112300-1	18S+ribosomal+RNA	PF3D7_0112300-1	2149	PF3D7_0112300
Pf3D7_01_v3	474653	T		915		0	0	0	6	12	11	1	1	0.55532	0.908824	rna_PF3D7_0112300-1	rna_PF3D7_0112300-1	Pf3D7_01_v3	473739	475887	PF3D7_0112300-1	18S+ribosomal+RNA	PF3D7_0112300-1	2149	PF3D7_0112300
Pf3D7_01_v3	474654	T		916		0	1	0	3	8	4	0.741745	0.741745	0.535264	0.650655	rna_PF3D7_0112300-1	rna_PF3D7_0112300-1	Pf3D7_01_v3	473739	475887	PF3D7_0112300-1	18S+ribosomal+RNA	PF3D7_0112300-1	2149	PF3D7_0112300
Pf3D7_01_v3	474655	T		917		0	0	0	1	11	3	1	1	0.317702	0.455554	rna_PF3D7_0112300-1	rna_PF3D7_0112300-1	Pf3D7_01_v3	473739	475887	PF3D7_0112300-1	18S+ribosomal+RNA	PF3D7_0112300-1	2149	PF3D7_0112300
Pf3D7_01_v3	474656	T		918		0	0	0	2	4	13	1	1	0.70205	2.06899	rna_PF3D7_0112300-1	rna_PF3D7_0112300-1	Pf3D7_01_v3	473739	475887	PF3D7_0112300-1	18S+ribosomal+RNA	PF3D7_0112300-1	2149	PF3D7_0112300
Pf3D7_01_v3	474657	T		919		3	1	0	13	8	4	1.18679	0.741745	1.22328	0.650655	rna_PF3D7_0112300-1	rna_PF3D7_0112300-1	Pf3D7_01_v3	473739	475887	PF3D7_0112300-1	18S+ribosomal+RNA	PF3D7_0112300-1	2149	PF3D7_0112300
Pf3D7_01_v3	474658	T		920		0	0	0	1	8	3	1	1	0.397661	0.570206	rna_PF3D7_0112300-1	rna_PF3D7_0112300-1	Pf3D7_01_v3	473739	475887	PF3D7_0112300-1	18S+ribosomal+RNA	PF3D7_0112300-1	2149	PF3D7_0112300
Pf3D7_01_v3	474659	T		921		0	0	0	0	8	12	1	1	0.328859	1.29425	rna_PF3D7_0112300-1	rna_PF3D7_0112300-1	Pf3D7_01_v3	473739	475887	PF3D7_0112300-1	18S+ribosomal+RNA	PF3D7_0112300-1	2149	PF3D7_0112300
Pf3D7_01_v3	474660	T		922		1	0	1	5	3	14	1.2	1.2037	1.15904	2.50655	rna_PF3D7_0112300-1	rna_PF3D7_0112300-1	Pf3D7_01_v3	473739	475887	PF3D7_0112300-1	18S+ribosomal+RNA	PF3D7_0112300-1	2149	PF3D7_0112300
Pf3D7_01_v3	474661	T		923		8	0	3	28	14	14	2.6	1.61109	1.50018	0.967932	rna_PF3D7_0112300-1	rna_PF3D7_0112300-1	Pf3D7_01_v3	473739	475887	PF3D7_0112300-1	18S+ribosomal+RNA	PF3D7_0112300-1	2149	PF3D7_0112300
Pf3D7_01_v3	474662	T		924		0	0	0	8	6	0	1	1	1.05654	0.395162	rna_PF3D7_0112300-1	rna_PF3D7_0112300-1	Pf3D7_01_v3	473739	475887	PF3D7_0112300-1	18S+ribosomal+RNA	PF3D7_0112300-1	2149	PF3D7_0112300
Pf3D7_01_v3	474663	C		925		2	0	0	14	4	25	1.4	1	1.94465	3.52195	rna_PF3D7_0112300-1	rna_PF3D7_0112300-1	Pf3D7_01_v3	473739	475887	PF3D7_0112300-1	18S+ribosomal+RNA	PF3D7_0112300-1	2149	PF3D7_0112300
Pf3D7_01_v3	474664	A		926		0	0	1	9	5	15	1	1.2037	1.26693	2.05205	rna_PF3D7_0112300-1	rna_PF3D7_0112300-1	Pf3D7_01_v3	473739	475887	PF3D7_0112300-1	18S+ribosomal+RNA	PF3D7_0112300-1	2149	PF3D7_0112300
Pf3D7_01_v3	474665	T		927		4	0	2	11	3	21	1.8	1.40739	1.87013	3.47659	rna_PF3D7_0112300-1	rna_PF3D7_0112300-1	Pf3D7_01_v3	473739	475887	PF3D7_0112300-1	18S+ribosomal+RNA	PF3D7_0112300-1	2149	PF3D7_0112300
Pf3D7_01_v3	474666	A		928		0	1	10	14	16	19	0.741745	2.25264	0.773174	1.11145	rna_PF3D7_0112300-1	rna_PF3D7_0112300-1	Pf3D7_01_v3	473739	475887	PF3D7_0112300-1	18S+ribosomal+RNA	PF3D7_0112300-1	2149	PF3D7_0112300
Pf3D7_01_v3	474667	A		929		0	2	3	15	9	12	0.589503	0.949739	1.25555	1.19407	rna_PF3D7_0112300-1	rna_PF3D7_0112300-1	Pf3D7_01_v3	473739	475887	PF3D7_0112300-1	18S+ribosomal+RNA	PF3D7_0112300-1	2149	PF3D7_0112300
Pf3D7_01_v3	474668	T		930		0	4	0	7	9	0	0.41794	0.41794	0.747741	0.303406	rna_PF3D7_0112300-1	rna_PF3D7_0112300-1	Pf3D7_01_v3	473739	475887	PF3D7_0112300-1	18S+ribosomal+RNA	PF3D7_0112300-1	2149	PF3D7_0112300
Pf3D7_01_v3	474669	T		931		0	0	0	21	10	12	1	1	1.51885	1.10829	rna_PF3D7_0112300-1	rna_PF3D7_0112300-1	Pf3D7_01_v3	473739	475887	PF3D7_0112300-1	18S+ribosomal+RNA	PF3D7_0112300-1	2149	PF3D7_0112300
Pf3D7_01_v3	474670	T		932		2	0	1	8	16	10	1.4	1.2037	0.526151	0.678189	rna_PF3D7_0112300-1	rna_PF3D7_0112300-1	Pf3D7_01_v3	473739	475887	PF3D7_0112300-1	18S+ribosomal+RNA	PF3D7_0112300-1	2149	PF3D7_0112300
Pf3D7_01_v3	474671	T		933		0	0	0	0	13	5	1	1	0.231679	0.515057	rna_PF3D7_0112300-1	rna_PF3D7_0112300-1	Pf3D7_01_v3	473739	475887	PF3D7_0112300-1	18S+ribosomal+RNA	PF3D7_0112300-1	2149	PF3D7_0112300
Pf3D7_01_v3	474672	T		934		0	0	0	15	18	19	1	1	0.740043	1.01004	rna_PF3D7_0112300-1	rna_PF3D7_0112300-1	Pf3D7_01_v3	473739	475887	PF3D7_0112300-1	18S+ribosomal+RNA	PF3D7_0112300-1	2149	PF3D7_0112300
Pf3D7_01_v3	474673	T		935		0	1	0	5	16	14	0.741745	0.741745	0.40264	0.87075	rna_PF3D7_0112300-1	rna_PF3D7_0112300-1	Pf3D7_01_v3	473739	475887	PF3D7_0112300-1	18S+ribosomal+RNA	PF3D7_0112300-1	2149	PF3D7_0112300
Pf3D7_01_v3	474674	T		936		0	0	0	14	6	12	1	1	1.55258	1.55518	rna_PF3D7_0112300-1	rna_PF3D7_0112300-1	Pf3D7_01_v3	473739	475887	PF3D7_0112300-1	18S+ribosomal+RNA	PF3D7_0112300-1	2149	PF3D7_0112300
Pf3D7_01_v3	474675	T		937		0	0	0	8	5	1	1	1	1.17499	0.546968	rna_PF3D7_0112300-1	rna_PF3D7_0112300-1	Pf3D7_01_v3	473739	475887	PF3D7_0112300-1	18S+ribosomal+RNA	PF3D7_0112300-1	2149	PF3D7_0112300
Pf3D7_01_v3	474676	G		938		0	0	9	25	11	22	1	2.83326	1.63692	1.67674	rna_PF3D7_0112300-1	rna_PF3D7_0112300-1	Pf3D7_01_v3	473739	475887	PF3D7_0112300-1	18S+ribosomal+RNA	PF3D7_0112300-1	2149	PF3D7_0112300
Pf3D7_01_v3	474677	A		939		0	2	5	22	12	20	0.589503	1.1899	1.37956	1.45095	rna_PF3D7_0112300-1	rna_PF3D7_0112300-1	Pf3D7_01_v3	473739	475887	PF3D7_0112300-1	18S+ribosomal+RNA	PF3D7_0112300-1	2149	PF3D7_0112300
Pf3D7_01_v3	474678	T		940		0	0	4	22	10	21	1	1.81478	1.57777	1.72831	rna_PF3D7_0112300-1	rna_PF3D7_0112300-1	Pf3D7_01_v3	473739	475887	PF3D7_0112300-1	18S+ribosomal+RNA	PF3D7_0112300-1	2149	PF3D7_0112300
Pf3D7_01_v3	474679	A		941		1	1	2	9	9	19	0.890094	1.04392	0.874694	1.71363	rna_PF3D7_0112300-1	rna_PF3D7_0112300-1	Pf3D7_01_v3	473739	475887	PF3D7_0112300-1	18S+ribosomal+RNA	PF3D7_0112300-1	2149	PF3D7_0112300
Pf3D7_01_v3	474680	T		942		1	1	2	21	17	14	0.890094	1.04392	1.01063	0.829127	rna_PF3D7_0112300-1	rna_PF3D7_0112300-1	Pf3D7_01_v3	473739	475887	PF3D7_0112300-1	18S+ribosomal+RNA	PF3D7_0112300-1	2149	PF3D7_0112300
Pf3D7_01_v3	474681	T		943		0	0	0	16	4	3	1	1	2.15175	0.858189	rna_PF3D7_0112300-1	rna_PF3D7_0112300-1	Pf3D7_01_v3	473739	475887	PF3D7_0112300-1	18S+ribosomal+RNA	PF3D7_0112300-1	2149	PF3D7_0112300
Pf3D7_01_v3	474682	C		944		10	1	0	12	12	6	2.22523	0.741745	0.864409	0.607646	rna_PF3D7_0112300-1	rna_PF3D7_0112300-1	Pf3D7_01_v3	473739	475887	PF3D7_0112300-1	18S+ribosomal+RNA	PF3D7_0112300-1	2149	PF3D7_0112300
Pf3D7_01_v3	474683	T		945		3	1	0	10	12	9	1.18679	0.741745	0.761379	0.788353	rna_PF3D7_0112300-1	rna_PF3D7_0112300-1	Pf3D7_01_v3	473739	475887	PF3D7_0112300-1	18S+ribosomal+RNA	PF3D7_0112300-1	2149	PF3D7_0112300
Pf3D7_01_v3	474684	T		946		2	6	7	28	35	40	0.453216	0.785315	0.690731	1.08628	rna_PF3D7_0112300-1	rna_PF3D7_0112300-1	Pf3D7_01_v3	473739	475887	PF3D7_0112300-1	18S+ribosomal+RNA	PF3D7_0112300-1	2149	PF3D7_0112300
Pf3D7_01_v3	474685	A		947		3	3	0	15	21	7	0.782581	0.489113	0.650953	0.426672	rna_PF3D7_0112300-1	rna_PF3D7_0112300-1	Pf3D7_01_v3	473739	475887	PF3D7_0112300-1	18S+ribosomal+RNA	PF3D7_0112300-1	2149	PF3D7_0112300
Pf3D7_01_v3	474686	T		948		3	0	1	12	3	17	1.6	1.2037	1.98864	2.92228	rna_PF3D7_0112300-1	rna_PF3D7_0112300-1	Pf3D7_01_v3	473739	475887	PF3D7_0112300-1	18S+ribosomal+RNA	PF3D7_0112300-1	2149	PF3D7_0112300
Pf3D7_01_v3	474687	T		949		0	1	0	11	17	9	0.741745	0.741745	0.618608	0.599932	rna_PF3D7_0112300-1	rna_PF3D7_0112300-1	Pf3D7_01_v3	473739	475887	PF3D7_0112300-1	18S+ribosomal+RNA	PF3D7_0112300-1	2149	PF3D7_0112300
Pf3D7_01_v3	474688	A		950		4	2	4	21	7	14	1.06111	1.06982	1.93612	1.5884	rna_PF3D7_0112300-1	rna_PF3D7_0112300-1	Pf3D7_01_v3	473739	475887	PF3D7_0112300-1	18S+ribosomal+RNA	PF3D7_0112300-1	2149	PF3D7_0112300
Pf3D7_01_v3	474689	G		951		3	1	0	9	8	2	1.18679	0.741745	0.948074	0.489757	rna_PF3D7_0112300-1	rna_PF3D7_0112300-1	Pf3D7_01_v3	473739	475887	PF3D7_0112300-1	18S+ribosomal+RNA	PF3D7_0112300-1	2149	PF3D7_0112300
Pf3D7_01_v3	474690	C		952		0	0	0	11	5	3	1	1	1.45082	0.76198	rna_PF3D7_0112300-1	rna_PF3D7_0112300-1	Pf3D7_01_v3	473739	475887	PF3D7_0112300-1	18S+ribosomal+RNA	PF3D7_0112300-1	2149	PF3D7_0112300
Pf3D7_01_v3	474691	T		953		12	0	3	22	22	4	3.4	1.61109	0.84732	0.299221	rna_PF3D7_0112300-1	rna_PF3D7_0112300-1	Pf3D7_01_v3	473739	475887	PF3D7_0112300-1	18S+ribosomal+RNA	PF3D7_0112300-1	2149	PF3D7_0112300
Pf3D7_01_v3	474692	T		954		0	7	0	11	22	2	0.290934	0.290934	0.499278	0.225228	rna_PF3D7_0112300-1	rna_PF3D7_0112300-1	Pf3D7_01_v3	473739	475887	PF3D7_0112300-1	18S+ribosomal+RNA	PF3D7_0112300-1	2149	PF3D7_0112300
Pf3D7_01_v3	474693	A		955		0	1	4	11	12	3	0.741745	1.3461	0.812894	0.426938	rna_PF3D7_0112300-1	rna_PF3D7_0112300-1	Pf3D7_01_v3	473739	475887	PF3D7_0112300-1	18S+ribosomal+RNA	PF3D7_0112300-1	2149	PF3D7_0112300
Pf3D7_01_v3	474694	G		956		0	6	0	6	16	2	0.323726	0.323726	0.44381	0.293068	rna_PF3D7_0112300-1	rna_PF3D7_0112300-1	Pf3D7_01_v3	473739	475887	PF3D7_0112300-1	18S+ribosomal+RNA	PF3D7_0112300-1	2149	PF3D7_0112300
Pf3D7_01_v3	474695	T		957		0	0	4	19	0	7	1	1.81478	4.97505	2.71241	rna_PF3D7_0112300-1	rna_PF3D7_0112300-1	Pf3D7_01_v3	473739	475887	PF3D7_0112300-1	18S+ribosomal+RNA	PF3D7_0112300-1	2149	PF3D7_0112300
Pf3D7_01_v3	474696	T		958		0	0	3	27	26	41	1	1.61109	0.871094	1.44509	rna_PF3D7_0112300-1	rna_PF3D7_0112300-1	Pf3D7_01_v3	473739	475887	PF3D7_0112300-1	18S+ribosomal+RNA	PF3D7_0112300-1	2149	PF3D7_0112300
Pf3D7_01_v3	474697	A		959		0	0	0	7	4	5	1	1	1.2198	1.10035	rna_PF3D7_0112300-1	rna_PF3D7_0112300-1	Pf3D7_01_v3	473739	475887	PF3D7_0112300-1	18S+ribosomal+RNA	PF3D7_0112300-1	2149	PF3D7_0112300
Pf3D7_01_v3	474698	C		960		0	1	2	7	7	11	0.741745	1.04392	0.88469	1.32495	rna_PF3D7_0112300-1	rna_PF3D7_0112300-1	Pf3D7_01_v3	473739	475887	PF3D7_0112300-1	18S+ribosomal+RNA	PF3D7_0112300-1	2149	PF3D7_0112300
Pf3D7_01_v3	474699	G		961		3	2	3	23	22	4	0.943204	0.949739	0.878961	0.299221	rna_PF3D7_0112300-1	rna_PF3D7_0112300-1	Pf3D7_01_v3	473739	475887	PF3D7_0112300-1	18S+ribosomal+RNA	PF3D7_0112300-1	2149	PF3D7_0112300
Pf3D7_01_v3	474700	A		962		1	1	0	21	21	3	0.890094	0.741745	0.848412	0.272747	rna_PF3D7_0112300-1	rna_PF3D7_0112300-1	Pf3D7_01_v3	473739	475887	PF3D7_0112300-1	18S+ribosomal+RNA	PF3D7_0112300-1	2149	PF3D7_0112300
Pf3D7_01_v3	474701	T		963		1	1	0	23	24	2	0.890094	0.741745	0.815998	0.209094	rna_PF3D7_0112300-1	rna_PF3D7_0112300-1	Pf3D7_01_v3	473739	475887	PF3D7_0112300-1	18S+ribosomal+RNA	PF3D7_0112300-1	2149	PF3D7_0112300
Pf3D7_01_v3	474702	T		964		0	1	1	19	2	4	0.741745	0.892835	3.29429	1.3101	rna_PF3D7_0112300-1	rna_PF3D7_0112300-1	Pf3D7_01_v3	473739	475887	PF3D7_0112300-1	18S+ribosomal+RNA	PF3D7_0112300-1	2149	PF3D7_0112300
Pf3D7_01_v3	474703	A		965		3	5	0	54	29	20	0.583758	0.364849	1.46435	0.701672	rna_PF3D7_0112300-1	rna_PF3D7_0112300-1	Pf3D7_01_v3	473739	475887	PF3D7_0112300-1	18S+ribosomal+RNA	PF3D7_0112300-1	2149	PF3D7_0112300
Pf3D7_01_v3	474704	A		966		9	0	0	28	49	3	2.8	1	0.507998	0.128437	rna_PF3D7_0112300-1	rna_PF3D7_0112300-1	Pf3D7_01_v3	473739	475887	PF3D7_0112300-1	18S+ribosomal+RNA	PF3D7_0112300-1	2149	PF3D7_0112300
Pf3D7_01_v3	474705	T		967		0	0	0	26	11	7	1	1	1.69189	0.712646	rna_PF3D7_0112300-1	rna_PF3D7_0112300-1	Pf3D7_01_v3	473739	475887	PF3D7_0112300-1	18S+ribosomal+RNA	PF3D7_0112300-1	2149	PF3D7_0112300
Pf3D7_01_v3	474706	A		968		0	0	0	7	2	6	1	1	1.63189	1.63407	rna_PF3D7_0112300-1	rna_PF3D7_0112300-1	Pf3D7_01_v3	473739	475887	PF3D7_0112300-1	18S+ribosomal+RNA	PF3D7_0112300-1	2149	PF3D7_0112300
Pf3D7_01_v3	474707	G		969		0	0	0	8	0	0	1	1	2.6737	1	rna_PF3D7_0112300-1	rna_PF3D7_0112300-1	Pf3D7_01_v3	473739	475887	PF3D7_0112300-1	18S+ribosomal+RNA	PF3D7_0112300-1	2149	PF3D7_0112300
Pf3D7_01_v3	474708	G		970		1	2	0	11	5	1	0.707403	0.589503	1.45082	0.546968	rna_PF3D7_0112300-1	rna_PF3D7_0112300-1	Pf3D7_01_v3	473739	475887	PF3D7_0112300-1	18S+ribosomal+RNA	PF3D7_0112300-1	2149	PF3D7_0112300
Pf3D7_01_v3	474709	A		971		1	3	0	13	4	3	0.586936	0.489113	1.8411	0.858189	rna_PF3D7_0112300-1	rna_PF3D7_0112300-1	Pf3D7_01_v3	473739	475887	PF3D7_0112300-1	18S+ribosomal+RNA	PF3D7_0112300-1	2149	PF3D7_0112300
Pf3D7_01_v3	474710	G		972		0	1	0	21	2	1	0.741745	0.741745	3.57135	0.824148	rna_PF3D7_0112300-1	rna_PF3D7_0112300-1	Pf3D7_01_v3	473739	475887	PF3D7_0112300-1	18S+ribosomal+RNA	PF3D7_0112300-1	2149	PF3D7_0112300
Pf3D7_01_v3	474711	T		973		1	0	0	9	14	1	1.2	1	0.630639	0.272263	rna_PF3D7_0112300-1	rna_PF3D7_0112300-1	Pf3D7_01_v3	473739	475887	PF3D7_0112300-1	18S+ribosomal+RNA	PF3D7_0112300-1	2149	PF3D7_0112300
Pf3D7_01_v3	474712	A		974		0	0	0	12	8	1	1	1	1.15448	0.409308	rna_PF3D7_0112300-1	rna_PF3D7_0112300-1	Pf3D7_01_v3	473739	475887	PF3D7_0112300-1	18S+ribosomal+RNA	PF3D7_0112300-1	2149	PF3D7_0112300
Pf3D7_01_v3	474713	G		975		0	0	1	10	1	1	1	1.2037	2.46365	0.991657	rna_PF3D7_0112300-1	rna_PF3D7_0112300-1	Pf3D7_01_v3	473739	475887	PF3D7_0112300-1	18S+ribosomal+RNA	PF3D7_0112300-1	2149	PF3D7_0112300
Pf3D7_01_v3	474714	C		976		1	0	0	6	12	9	1.2	1	0.55532	0.788353	rna_PF3D7_0112300-1	rna_PF3D7_0112300-1	Pf3D7_01_v3	473739	475887	PF3D7_0112300-1	18S+ribosomal+RNA	PF3D7_0112300-1	2149	PF3D7_0112300
Pf3D7_01_v3	474715	T		977		1	1	0	14	24	19	0.890094	0.741745	0.551634	0.792984	rna_PF3D7_0112300-1	rna_PF3D7_0112300-1	Pf3D7_01_v3	473739	475887	PF3D7_0112300-1	18S+ribosomal+RNA	PF3D7_0112300-1	2149	PF3D7_0112300
Pf3D7_01_v3	474716	T		978		0	0	0	11	7	13	1	1	1.1851	1.50058	rna_PF3D7_0112300-1	rna_PF3D7_0112300-1	Pf3D7_01_v3	473739	475887	PF3D7_0112300-1	18S+ribosomal+RNA	PF3D7_0112300-1	2149	PF3D7_0112300
Pf3D7_01_v3	474717	T		979		2	0	0	5	1	6	1.4	1	1.6302	1.9662	rna_PF3D7_0112300-1	rna_PF3D7_0112300-1	Pf3D7_01_v3	473739	475887	PF3D7_0112300-1	18S+ribosomal+RNA	PF3D7_0112300-1	2149	PF3D7_0112300
Pf3D7_01_v3	474718	G		980		0	0	0	6	3	3	1	1	1.27756	0.982205	rna_PF3D7_0112300-1	rna_PF3D7_0112300-1	Pf3D7_01_v3	473739	475887	PF3D7_0112300-1	18S+ribosomal+RNA	PF3D7_0112300-1	2149	PF3D7_0112300
Pf3D7_01_v3	474720	G		982		0	1	0	2	1	1	0.741745	0.741745	1.13013	0.991657	rna_PF3D7_0112300-1	rna_PF3D7_0112300-1	Pf3D7_01_v3	473739	475887	PF3D7_0112300-1	18S+ribosomal+RNA	PF3D7_0112300-1	2149	PF3D7_0112300
Pf3D7_01_v3	474721	G		983		1	7	0	4	24	6	0.349121	0.290934	0.257896	0.34648	rna_PF3D7_0112300-1	rna_PF3D7_0112300-1	Pf3D7_01_v3	473739	475887	PF3D7_0112300-1	18S+ribosomal+RNA	PF3D7_0112300-1	2149	PF3D7_0112300
Pf3D7_01_v3	474722	G		984		56	33	20	80	87	29	0.976806	0.406247	0.76473	0.348984	rna_PF3D7_0112300-1	rna_PF3D7_0112300-1	Pf3D7_01_v3	473739	475887	PF3D7_0112300-1	18S+ribosomal+RNA	PF3D7_0112300-1	2149	PF3D7_0112300
Pf3D7_01_v3	474723	C		985		33	22	30	91	65	42	0.877619	0.821135	1.13973	0.641266	rna_PF3D7_0112300-1	rna_PF3D7_0112300-1	Pf3D7_01_v3	473739	475887	PF3D7_0112300-1	18S+ribosomal+RNA	PF3D7_0112300-1	2149	PF3D7_0112300
Pf3D7_01_v3	474724	A		986		50	7	25	92	16	34	3.20027	1.77248	3.98447	1.83355	rna_PF3D7_0112300-1	rna_PF3D7_0112300-1	Pf3D7_01_v3	473739	475887	PF3D7_0112300-1	18S+ribosomal+RNA	PF3D7_0112300-1	2149	PF3D7_0112300
Pf3D7_01_v3	474725	T		987		32	26	30	86	61	39	0.736137	0.707373	1.1468	0.636463	rna_PF3D7_0112300-1	rna_PF3D7_0112300-1	Pf3D7_01_v3	473739	475887	PF3D7_0112300-1	18S+ribosomal+RNA	PF3D7_0112300-1	2149	PF3D7_0112300
Pf3D7_01_v3	474726	T		988		27	18	4	41	41	6	0.880681	0.249725	0.835814	0.215354	rna_PF3D7_0112300-1	rna_PF3D7_0112300-1	Pf3D7_01_v3	473739	475887	PF3D7_0112300-1	18S+ribosomal+RNA	PF3D7_0112300-1	2149	PF3D7_0112300
Pf3D7_01_v3	474727	C		989		10	3	2	23	16	4	1.46734	0.688373	1.14371	0.389348	rna_PF3D7_0112300-1	rna_PF3D7_0112300-1	Pf3D7_01_v3	473739	475887	PF3D7_0112300-1	18S+ribosomal+RNA	PF3D7_0112300-1	2149	PF3D7_0112300
Pf3D7_01_v3	474728	G		990		0	0	0	8	11	4	1	1	0.702475	0.519827	rna_PF3D7_0112300-1	rna_PF3D7_0112300-1	Pf3D7_01_v3	473739	475887	PF3D7_0112300-1	18S+ribosomal+RNA	PF3D7_0112300-1	2149	PF3D7_0112300
Pf3D7_01_v3	474729	T		991		0	1	0	17	10	6	0.741745	0.741745	1.28319	0.694951	rna_PF3D7_0112300-1	rna_PF3D7_0112300-1	Pf3D7_01_v3	473739	475887	PF3D7_0112300-1	18S+ribosomal+RNA	PF3D7_0112300-1	2149	PF3D7_0112300
Pf3D7_01_v3	474730	A		992		0	0	0	13	7	5	1	1	1.3353	0.798055	rna_PF3D7_0112300-1	rna_PF3D7_0112300-1	Pf3D7_01_v3	473739	475887	PF3D7_0112300-1	18S+ribosomal+RNA	PF3D7_0112300-1	2149	PF3D7_0112300
Pf3D7_01_v3	474731	T		993		1	0	0	22	8	2	1.2	1	1.8425	0.489757	rna_PF3D7_0112300-1	rna_PF3D7_0112300-1	Pf3D7_01_v3	473739	475887	PF3D7_0112300-1	18S+ribosomal+RNA	PF3D7_0112300-1	2149	PF3D7_0112300
Pf3D7_01_v3	474732	T		994		0	0	0	3	1	1	1	1	1.29682	0.991657	rna_PF3D7_0112300-1	rna_PF3D7_0112300-1	Pf3D7_01_v3	473739	475887	PF3D7_0112300-1	18S+ribosomal+RNA	PF3D7_0112300-1	2149	PF3D7_0112300
Pf3D7_01_v3	474733	C		995		1	0	0	11	6	0	1.2	1	1.30456	0.395162	rna_PF3D7_0112300-1	rna_PF3D7_0112300-1	Pf3D7_01_v3	473739	475887	PF3D7_0112300-1	18S+ribosomal+RNA	PF3D7_0112300-1	2149	PF3D7_0112300
Pf3D7_01_v3	474734	A		996		0	0	0	6	0	0	1	1	2.25528	1	rna_PF3D7_0112300-1	rna_PF3D7_0112300-1	Pf3D7_01_v3	473739	475887	PF3D7_0112300-1	18S+ribosomal+RNA	PF3D7_0112300-1	2149	PF3D7_0112300
Pf3D7_01_v3	474735	G		997		1	0	0	11	10	3	1.2	1	0.929689	0.48828	rna_PF3D7_0112300-1	rna_PF3D7_0112300-1	Pf3D7_01_v3	473739	475887	PF3D7_0112300-1	18S+ribosomal+RNA	PF3D7_0112300-1	2149	PF3D7_0112300
Pf3D7_01_v3	474736	A		998		0	0	0	9	13	2	1	1	0.66791	0.34503	rna_PF3D7_0112300-1	rna_PF3D7_0112300-1	Pf3D7_01_v3	473739	475887	PF3D7_0112300-1	18S+ribosomal+RNA	PF3D7_0112300-1	2149	PF3D7_0112300
Pf3D7_01_v3	474737	T		999		1	0	0	7	1	1	1.2	1	1.96358	0.991657	rna_PF3D7_0112300-1	rna_PF3D7_0112300-1	Pf3D7_01_v3	473739	475887	PF3D7_0112300-1	18S+ribosomal+RNA	PF3D7_0112300-1	2149	PF3D7_0112300
Pf3D7_01_v3	474738	G		1000		0	0	0	14	4	3	1	1	1.94465	0.858189	rna_PF3D7_0112300-1	rna_PF3D7_0112300-1	Pf3D7_01_v3	473739	475887	PF3D7_0112300-1	18S+ribosomal+RNA	PF3D7_0112300-1	2149	PF3D7_0112300
Pf3D7_01_v3	474739	T		1001		0	0	0	7	4	2	1	1	1.2198	0.737109	rna_PF3D7_0112300-1	rna_PF3D7_0112300-1	Pf3D7_01_v3	473739	475887	PF3D7_0112300-1	18S+ribosomal+RNA	PF3D7_0112300-1	2149	PF3D7_0112300
Pf3D7_01_v3	474740	C		1002		0	0	0	4	7	0	1	1	0.659383	0.358975	rna_PF3D7_0112300-1	rna_PF3D7_0112300-1	Pf3D7_01_v3	473739	475887	PF3D7_0112300-1	18S+ribosomal+RNA	PF3D7_0112300-1	2149	PF3D7_0112300
Pf3D7_01_v3	474741	A		1003		0	0	0	8	4	4	1	1	1.32335	0.979269	rna_PF3D7_0112300-1	rna_PF3D7_0112300-1	Pf3D7_01_v3	473739	475887	PF3D7_0112300-1	18S+ribosomal+RNA	PF3D7_0112300-1	2149	PF3D7_0112300
Pf3D7_01_v3	474742	G		1004		0	0	0	5	4	13	1	1	1.0127	2.06899	rna_PF3D7_0112300-1	rna_PF3D7_0112300-1	Pf3D7_01_v3	473739	475887	PF3D7_0112300-1	18S+ribosomal+RNA	PF3D7_0112300-1	2149	PF3D7_0112300
Pf3D7_01_v3	474743	A		1005		0	0	0	6	1	3	1	1	1.79689	1.38148	rna_PF3D7_0112300-1	rna_PF3D7_0112300-1	Pf3D7_01_v3	473739	475887	PF3D7_0112300-1	18S+ribosomal+RNA	PF3D7_0112300-1	2149	PF3D7_0112300
Pf3D7_01_v3	474744	G		1006		0	0	0	2	0	4	1	1	1.41843	1.97852	rna_PF3D7_0112300-1	rna_PF3D7_0112300-1	Pf3D7_01_v3	473739	475887	PF3D7_0112300-1	18S+ribosomal+RNA	PF3D7_0112300-1	2149	PF3D7_0112300
Pf3D7_01_v3	474745	G		1007		0	0	0	7	2	8	1	1	1.63189	1.95804	rna_PF3D7_0112300-1	rna_PF3D7_0112300-1	Pf3D7_01_v3	473739	475887	PF3D7_0112300-1	18S+ribosomal+RNA	PF3D7_0112300-1	2149	PF3D7_0112300
Pf3D7_01_v3	474746	T		1008		0	0	0	3	2	2	1	1	1.07776	0.986133	rna_PF3D7_0112300-1	rna_PF3D7_0112300-1	Pf3D7_01_v3	473739	475887	PF3D7_0112300-1	18S+ribosomal+RNA	PF3D7_0112300-1	2149	PF3D7_0112300
Pf3D7_01_v3	474747	G		1009		1	0	0	9	13	16	1.2	1	0.66791	1.13849	rna_PF3D7_0112300-1	rna_PF3D7_0112300-1	Pf3D7_01_v3	473739	475887	PF3D7_0112300-1	18S+ribosomal+RNA	PF3D7_0112300-1	2149	PF3D7_0112300
Pf3D7_01_v3	474748	A		1010		0	0	0	4	7	17	1	1	0.659383	1.85185	rna_PF3D7_0112300-1	rna_PF3D7_0112300-1	Pf3D7_01_v3	473739	475887	PF3D7_0112300-1	18S+ribosomal+RNA	PF3D7_0112300-1	2149	PF3D7_0112300
Pf3D7_01_v3	474749	A		1011		3	1	2	14	5	44	1.18679	1.04392	1.72664	5.16972	rna_PF3D7_0112300-1	rna_PF3D7_0112300-1	Pf3D7_01_v3	473739	475887	PF3D7_0112300-1	18S+ribosomal+RNA	PF3D7_0112300-1	2149	PF3D7_0112300
Pf3D7_01_v3	474750	A		1012		0	0	0	18	16	15	1	1	0.937856	0.91889	rna_PF3D7_0112300-1	rna_PF3D7_0112300-1	Pf3D7_01_v3	473739	475887	PF3D7_0112300-1	18S+ribosomal+RNA	PF3D7_0112300-1	2149	PF3D7_0112300
Pf3D7_01_v3	474751	T		1013		0	2	0	15	10	22	0.589503	0.589503	1.16535	1.7972	rna_PF3D7_0112300-1	rna_PF3D7_0112300-1	Pf3D7_01_v3	473739	475887	PF3D7_0112300-1	18S+ribosomal+RNA	PF3D7_0112300-1	2149	PF3D7_0112300
Pf3D7_01_v3	474752	T		1014		0	0	0	3	6	7	1	1	0.64318	1.07184	rna_PF3D7_0112300-1	rna_PF3D7_0112300-1	Pf3D7_01_v3	473739	475887	PF3D7_0112300-1	18S+ribosomal+RNA	PF3D7_0112300-1	2149	PF3D7_0112300
Pf3D7_01_v3	474753	C		1015		0	0	0	18	10	2	1	1	1.3421	0.41939	rna_PF3D7_0112300-1	rna_PF3D7_0112300-1	Pf3D7_01_v3	473739	475887	PF3D7_0112300-1	18S+ribosomal+RNA	PF3D7_0112300-1	2149	PF3D7_0112300
Pf3D7_01_v3	474754	T		1016		0	0	0	10	3	9	1	1	1.75161	1.81367	rna_PF3D7_0112300-1	rna_PF3D7_0112300-1	Pf3D7_01_v3	473739	475887	PF3D7_0112300-1	18S+ribosomal+RNA	PF3D7_0112300-1	2149	PF3D7_0112300
Pf3D7_01_v3	474755	A		1017		2	0	0	15	14	10	1.4	1	0.905231	0.75388	rna_PF3D7_0112300-1	rna_PF3D7_0112300-1	Pf3D7_01_v3	473739	475887	PF3D7_0112300-1	18S+ribosomal+RNA	PF3D7_0112300-1	2149	PF3D7_0112300
Pf3D7_01_v3	474756	A		1018		0	0	0	2	3	8	1	1	0.803502	1.67509	rna_PF3D7_0112300-1	rna_PF3D7_0112300-1	Pf3D7_01_v3	473739	475887	PF3D7_0112300-1	18S+ribosomal+RNA	PF3D7_0112300-1	2149	PF3D7_0112300
Pf3D7_01_v3	474757	G		1019		1	2	0	15	18	9	0.707403	0.589503	0.740043	0.572563	rna_PF3D7_0112300-1	rna_PF3D7_0112300-1	Pf3D7_01_v3	473739	475887	PF3D7_0112300-1	18S+ribosomal+RNA	PF3D7_0112300-1	2149	PF3D7_0112300
Pf3D7_01_v3	474758	A		1020		0	0	0	6	6	2	1	1	0.891199	0.588499	rna_PF3D7_0112300-1	rna_PF3D7_0112300-1	Pf3D7_01_v3	473739	475887	PF3D7_0112300-1	18S+ribosomal+RNA	PF3D7_0112300-1	2149	PF3D7_0112300
Pf3D7_01_v3	474759	T		1021		0	0	0	6	1	6	1	1	1.79689	1.9662	rna_PF3D7_0112300-1	rna_PF3D7_0112300-1	Pf3D7_01_v3	473739	475887	PF3D7_0112300-1	18S+ribosomal+RNA	PF3D7_0112300-1	2149	PF3D7_0112300
Pf3D7_01_v3	474760	T		1022		0	0	2	12	16	16	1	1.40739	0.690833	0.96703	rna_PF3D7_0112300-1	rna_PF3D7_0112300-1	Pf3D7_01_v3	473739	475887	PF3D7_0112300-1	18S+ribosomal+RNA	PF3D7_0112300-1	2149	PF3D7_0112300
Pf3D7_01_v3	474761	T		1023		0	0	1	14	14	9	1	1.2037	0.859465	0.700367	rna_PF3D7_0112300-1	rna_PF3D7_0112300-1	Pf3D7_01_v3	473739	475887	PF3D7_0112300-1	18S+ribosomal+RNA	PF3D7_0112300-1	2149	PF3D7_0112300
Pf3D7_01_v3	474762	T		1024		0	0	0	3	7	2	1	1	0.584281	0.534607	rna_PF3D7_0112300-1	rna_PF3D7_0112300-1	Pf3D7_01_v3	473739	475887	PF3D7_0112300-1	18S+ribosomal+RNA	PF3D7_0112300-1	2149	PF3D7_0112300
Pf3D7_01_v3	474763	C		1025		0	0	1	10	8	2	1	1.2037	1.01688	0.489757	rna_PF3D7_0112300-1	rna_PF3D7_0112300-1	Pf3D7_01_v3	473739	475887	PF3D7_0112300-1	18S+ribosomal+RNA	PF3D7_0112300-1	2149	PF3D7_0112300
Pf3D7_01_v3	474764	T		1026		0	1	0	2	1	0	0.741745	0.741745	1.13013	0.796748	rna_PF3D7_0112300-1	rna_PF3D7_0112300-1	Pf3D7_01_v3	473739	475887	PF3D7_0112300-1	18S+ribosomal+RNA	PF3D7_0112300-1	2149	PF3D7_0112300
Pf3D7_01_v3	474765	G		1027		0	0	0	3	1	0	1	1	1.29682	0.796748	rna_PF3D7_0112300-1	rna_PF3D7_0112300-1	Pf3D7_01_v3	473739	475887	PF3D7_0112300-1	18S+ribosomal+RNA	PF3D7_0112300-1	2149	PF3D7_0112300
Pf3D7_01_v3	474766	G		1028		0	0	0	3	3	1	1	1	0.922016	0.705051	rna_PF3D7_0112300-1	rna_PF3D7_0112300-1	Pf3D7_01_v3	473739	475887	PF3D7_0112300-1	18S+ribosomal+RNA	PF3D7_0112300-1	2149	PF3D7_0112300
Pf3D7_01_v3	474767	A		1029		0	0	0	1	2	0	1	1	0.800695	0.662162	rna_PF3D7_0112300-1	rna_PF3D7_0112300-1	Pf3D7_01_v3	473739	475887	PF3D7_0112300-1	18S+ribosomal+RNA	PF3D7_0112300-1	2149	PF3D7_0112300
Pf3D7_01_v3	474768	G		1030		2	0	0	20	7	5	1.4	1	1.86102	0.798055	rna_PF3D7_0112300-1	rna_PF3D7_0112300-1	Pf3D7_01_v3	473739	475887	PF3D7_0112300-1	18S+ribosomal+RNA	PF3D7_0112300-1	2149	PF3D7_0112300
Pf3D7_01_v3	474769	A		1031		2	0	0	3	6	0	1.4	1	0.64318	0.395162	rna_PF3D7_0112300-1	rna_PF3D7_0112300-1	Pf3D7_01_v3	473739	475887	PF3D7_0112300-1	18S+ribosomal+RNA	PF3D7_0112300-1	2149	PF3D7_0112300
Pf3D7_01_v3	474770	C		1032		0	0	0	3	0	0	1	1	1.62764	1	rna_PF3D7_0112300-1	rna_PF3D7_0112300-1	Pf3D7_01_v3	473739	475887	PF3D7_0112300-1	18S+ribosomal+RNA	PF3D7_0112300-1	2149	PF3D7_0112300
Pf3D7_01_v3	474771	G		1033		0	0	0	2	2	3	1	1	0.939228	1.14812	rna_PF3D7_0112300-1	rna_PF3D7_0112300-1	Pf3D7_01_v3	473739	475887	PF3D7_0112300-1	18S+ribosomal+RNA	PF3D7_0112300-1	2149	PF3D7_0112300
Pf3D7_01_v3	474772	G		1034		0	1	0	11	5	5	0.741745	0.741745	1.45082	0.976992	rna_PF3D7_0112300-1	rna_PF3D7_0112300-1	Pf3D7_01_v3	473739	475887	PF3D7_0112300-1	18S+ribosomal+RNA	PF3D7_0112300-1	2149	PF3D7_0112300
Pf3D7_01_v3	474773	A		1035		0	0	0	5	1	2	1	1	1.6302	1.18657	rna_PF3D7_0112300-1	rna_PF3D7_0112300-1	Pf3D7_01_v3	473739	475887	PF3D7_0112300-1	18S+ribosomal+RNA	PF3D7_0112300-1	2149	PF3D7_0112300
Pf3D7_01_v3	474774	C		1036		0	0	0	8	4	12	1	1	1.32335	1.94791	rna_PF3D7_0112300-1	rna_PF3D7_0112300-1	Pf3D7_01_v3	473739	475887	PF3D7_0112300-1	18S+ribosomal+RNA	PF3D7_0112300-1	2149	PF3D7_0112300
Pf3D7_01_v3	474775	T		1037		3	4	0	4	13	6	0.668704	0.41794	0.425559	0.571733	rna_PF3D7_0112300-1	rna_PF3D7_0112300-1	Pf3D7_01_v3	473739	475887	PF3D7_0112300-1	18S+ribosomal+RNA	PF3D7_0112300-1	2149	PF3D7_0112300
Pf3D7_01_v3	474776	A		1038		0	2	0	6	2	2	0.589503	0.589503	1.49336	0.986133	rna_PF3D7_0112300-1	rna_PF3D7_0112300-1	Pf3D7_01_v3	473739	475887	PF3D7_0112300-1	18S+ribosomal+RNA	PF3D7_0112300-1	2149	PF3D7_0112300
Pf3D7_01_v3	474777	C		1039		1	0	0	5	0	3	1.2	1	2.04607	1.73389	rna_PF3D7_0112300-1	rna_PF3D7_0112300-1	Pf3D7_01_v3	473739	475887	PF3D7_0112300-1	18S+ribosomal+RNA	PF3D7_0112300-1	2149	PF3D7_0112300
Pf3D7_01_v3	474778	T		1040		0	0	0	10	7	1	1	1	1.11	0.446791	rna_PF3D7_0112300-1	rna_PF3D7_0112300-1	Pf3D7_01_v3	473739	475887	PF3D7_0112300-1	18S+ribosomal+RNA	PF3D7_0112300-1	2149	PF3D7_0112300
Pf3D7_01_v3	474779	G		1041		0	1	0	4	0	0	0.741745	0.741745	1.83685	1	rna_PF3D7_0112300-1	rna_PF3D7_0112300-1	Pf3D7_01_v3	473739	475887	PF3D7_0112300-1	18S+ribosomal+RNA	PF3D7_0112300-1	2149	PF3D7_0112300
Pf3D7_01_v3	474780	C		1042		0	2	0	1	3	1	0.589503	0.589503	0.684988	0.705051	rna_PF3D7_0112300-1	rna_PF3D7_0112300-1	Pf3D7_01_v3	473739	475887	PF3D7_0112300-1	18S+ribosomal+RNA	PF3D7_0112300-1	2149	PF3D7_0112300
Pf3D7_01_v3	474781	G		1043		0	0	0	1	1	0	1	1	0.963438	0.796748	rna_PF3D7_0112300-1	rna_PF3D7_0112300-1	Pf3D7_01_v3	473739	475887	PF3D7_0112300-1	18S+ribosomal+RNA	PF3D7_0112300-1	2149	PF3D7_0112300
Pf3D7_01_v3	474782	A		1044		0	0	1	4	6	21	1	1.2037	0.725853	2.4252	rna_PF3D7_0112300-1	rna_PF3D7_0112300-1	Pf3D7_01_v3	473739	475887	PF3D7_0112300-1	18S+ribosomal+RNA	PF3D7_0112300-1	2149	PF3D7_0112300
Pf3D7_01_v3	474783	A		1045		0	1	0	10	8	2	0.741745	0.741745	1.01688	0.489757	rna_PF3D7_0112300-1	rna_PF3D7_0112300-1	Pf3D7_01_v3	473739	475887	PF3D7_0112300-1	18S+ribosomal+RNA	PF3D7_0112300-1	2149	PF3D7_0112300
Pf3D7_01_v3	474784	A		1046		0	0	1	2	6	3	1	1.2037	0.560507	0.685167	rna_PF3D7_0112300-1	rna_PF3D7_0112300-1	Pf3D7_01_v3	473739	475887	PF3D7_0112300-1	18S+ribosomal+RNA	PF3D7_0112300-1	2149	PF3D7_0112300
Pf3D7_01_v3	474785	G		1047		0	0	0	1	6	5	1	1	0.477834	0.878505	rna_PF3D7_0112300-1	rna_PF3D7_0112300-1	Pf3D7_01_v3	473739	475887	PF3D7_0112300-1	18S+ribosomal+RNA	PF3D7_0112300-1	2149	PF3D7_0112300
Pf3D7_01_v3	474786	C		1048		0	0	2	9	14	5	1	1.40739	0.630639	0.486315	rna_PF3D7_0112300-1	rna_PF3D7_0112300-1	Pf3D7_01_v3	473739	475887	PF3D7_0112300-1	18S+ribosomal+RNA	PF3D7_0112300-1	2149	PF3D7_0112300
Pf3D7_01_v3	474787	A		1049		1	0	0	6	13	5	1.2	1	0.5225	0.515057	rna_PF3D7_0112300-1	rna_PF3D7_0112300-1	Pf3D7_01_v3	473739	475887	PF3D7_0112300-1	18S+ribosomal+RNA	PF3D7_0112300-1	2149	PF3D7_0112300
Pf3D7_01_v3	474788	T		1050		2	0	1	5	10	12	1.4	1.2037	0.576191	1.10829	rna_PF3D7_0112300-1	rna_PF3D7_0112300-1	Pf3D7_01_v3	473739	475887	PF3D7_0112300-1	18S+ribosomal+RNA	PF3D7_0112300-1	2149	PF3D7_0112300
Pf3D7_01_v3	474789	T		1051		0	0	1	0	1	3	1	1.2037	0.796748	1.38148	rna_PF3D7_0112300-1	rna_PF3D7_0112300-1	Pf3D7_01_v3	473739	475887	PF3D7_0112300-1	18S+ribosomal+RNA	PF3D7_0112300-1	2149	PF3D7_0112300
Pf3D7_01_v3	474790	T		1052		0	0	1	4	4	2	1	1.2037	0.909149	0.737109	rna_PF3D7_0112300-1	rna_PF3D7_0112300-1	Pf3D7_01_v3	473739	475887	PF3D7_0112300-1	18S+ribosomal+RNA	PF3D7_0112300-1	2149	PF3D7_0112300
Pf3D7_01_v3	474791	G		1053		0	1	0	1	2	7	0.741745	0.741745	0.800695	1.79606	rna_PF3D7_0112300-1	rna_PF3D7_0112300-1	Pf3D7_01_v3	473739	475887	PF3D7_0112300-1	18S+ribosomal+RNA	PF3D7_0112300-1	2149	PF3D7_0112300
Pf3D7_01_v3	474792	C		1054		2	0	0	3	2	1	1.4	1	1.07776	0.824148	rna_PF3D7_0112300-1	rna_PF3D7_0112300-1	Pf3D7_01_v3	473739	475887	PF3D7_0112300-1	18S+ribosomal+RNA	PF3D7_0112300-1	2149	PF3D7_0112300
Pf3D7_01_v3	474793	C		1055		0	1	0	4	6	1	0.741745	0.741745	0.725853	0.49183	rna_PF3D7_0112300-1	rna_PF3D7_0112300-1	Pf3D7_01_v3	473739	475887	PF3D7_0112300-1	18S+ribosomal+RNA	PF3D7_0112300-1	2149	PF3D7_0112300
Pf3D7_01_v3	474794	T		1056		0	0	0	1	2	6	1	1	0.800695	1.63407	rna_PF3D7_0112300-1	rna_PF3D7_0112300-1	Pf3D7_01_v3	473739	475887	PF3D7_0112300-1	18S+ribosomal+RNA	PF3D7_0112300-1	2149	PF3D7_0112300
Pf3D7_01_v3	474795	A		1057		0	0	0	11	7	6	1	1	1.1851	0.885872	rna_PF3D7_0112300-1	rna_PF3D7_0112300-1	Pf3D7_01_v3	473739	475887	PF3D7_0112300-1	18S+ribosomal+RNA	PF3D7_0112300-1	2149	PF3D7_0112300
Pf3D7_01_v3	474796	A		1058		1	0	0	7	5	3	1.2	1	1.08305	0.76198	rna_PF3D7_0112300-1	rna_PF3D7_0112300-1	Pf3D7_01_v3	473739	475887	PF3D7_0112300-1	18S+ribosomal+RNA	PF3D7_0112300-1	2149	PF3D7_0112300
Pf3D7_01_v3	474797	T		1059		0	0	0	5	5	3	1	1	0.899168	0.76198	rna_PF3D7_0112300-1	rna_PF3D7_0112300-1	Pf3D7_01_v3	473739	475887	PF3D7_0112300-1	18S+ribosomal+RNA	PF3D7_0112300-1	2149	PF3D7_0112300
Pf3D7_01_v3	474798	C		1060		0	1	0	7	7	3	0.741745	0.741745	0.88469	0.622423	rna_PF3D7_0112300-1	rna_PF3D7_0112300-1	Pf3D7_01_v3	473739	475887	PF3D7_0112300-1	18S+ribosomal+RNA	PF3D7_0112300-1	2149	PF3D7_0112300
Pf3D7_01_v3	474799	T		1061		3	6	1	20	15	8	0.517961	0.389667	1.07412	0.612665	rna_PF3D7_0112300-1	rna_PF3D7_0112300-1	Pf3D7_01_v3	473739	475887	PF3D7_0112300-1	18S+ribosomal+RNA	PF3D7_0112300-1	2149	PF3D7_0112300
Pf3D7_01_v3	474800	A		1062		92	747	24	156	1334	45	0.0743054	0.0225547	0.0985545	0.0351836	rna_PF3D7_0112300-1	rna_PF3D7_0112300-1	Pf3D7_01_v3	473739	475887	PF3D7_0112300-1	18S+ribosomal+RNA	PF3D7_0112300-1	2149	PF3D7_0112300
Pf3D7_01_v3	474801	T		1063		219	252	48	299	348	68	0.504849	0.12145	0.70793	0.196433	rna_PF3D7_0112300-1	rna_PF3D7_0112300-1	Pf3D7_01_v3	473739	475887	PF3D7_0112300-1	18S+ribosomal+RNA	PF3D7_0112300-1	2149	PF3D7_0112300
Pf3D7_01_v3	474802	T		1064		263	208	97	417	239	131	0.730048	0.282736	1.42396	0.533274	rna_PF3D7_0112300-1	rna_PF3D7_0112300-1	Pf3D7_01_v3	473739	475887	PF3D7_0112300-1	18S+ribosomal+RNA	PF3D7_0112300-1	2149	PF3D7_0112300
Pf3D7_01_v3	474803	T		1065		133	215	64	281	279	90	0.363842	0.185039	0.828406	0.318909	rna_PF3D7_0112300-1	rna_PF3D7_0112300-1	Pf3D7_01_v3	473739	475887	PF3D7_0112300-1	18S+ribosomal+RNA	PF3D7_0112300-1	2149	PF3D7_0112300
Pf3D7_01_v3	474804	C		1066		113	208	14	150	286	30	0.321439	0.0524617	0.437836	0.11275	rna_PF3D7_0112300-1	rna_PF3D7_0112300-1	Pf3D7_01_v3	473739	475887	PF3D7_0112300-1	18S+ribosomal+RNA	PF3D7_0112300-1	2149	PF3D7_0112300
Pf3D7_01_v3	474805	C		1067		238	409	56	396	567	77	0.338906	0.0865182	0.575713	0.1362	rna_PF3D7_0112300-1	rna_PF3D7_0112300-1	Pf3D7_01_v3	473739	475887	PF3D7_0112300-1	18S+ribosomal+RNA	PF3D7_0112300-1	2149	PF3D7_0112300
Pf3D7_01_v3	474806	A		1068		516	282	91	611	505	109	1.05057	0.196969	0.992318	0.21309	rna_PF3D7_0112300-1	rna_PF3D7_0112300-1	Pf3D7_01_v3	473739	475887	PF3D7_0112300-1	18S+ribosomal+RNA	PF3D7_0112300-1	2149	PF3D7_0112300
Pf3D7_01_v3	474807	T		1069		460	387	79	591	586	93	0.68512	0.125914	0.828262	0.157822	rna_PF3D7_0112300-1	rna_PF3D7_0112300-1	Pf3D7_01_v3	473739	475887	PF3D7_0112300-1	18S+ribosomal+RNA	PF3D7_0112300-1	2149	PF3D7_0112300
Pf3D7_01_v3	474808	T		1070		349	203	89	478	243	103	0.987737	0.266869	1.6035	0.415892	rna_PF3D7_0112300-1	rna_PF3D7_0112300-1	Pf3D7_01_v3	473739	475887	PF3D7_0112300-1	18S+ribosomal+RNA	PF3D7_0112300-1	2149	PF3D7_0112300
Pf3D7_01_v3	474809	A		1071		398	488	101	631	668	135	0.471598	0.126227	0.776005	0.198504	rna_PF3D7_0112300-1	rna_PF3D7_0112300-1	Pf3D7_01_v3	473739	475887	PF3D7_0112300-1	18S+ribosomal+RNA	PF3D7_0112300-1	2149	PF3D7_0112300
Pf3D7_01_v3	474810	A		1072		341	357	75	537	460	97	0.552285	0.129908	0.957756	0.208955	rna_PF3D7_0112300-1	rna_PF3D7_0112300-1	Pf3D7_01_v3	473739	475887	PF3D7_0112300-1	18S+ribosomal+RNA	PF3D7_0112300-1	2149	PF3D7_0112300
Pf3D7_01_v3	474811	T		1073		291	189	53	342	233	69	0.886167	0.176572	1.2004	0.295829	rna_PF3D7_0112300-1	rna_PF3D7_0112300-1	Pf3D7_01_v3	473739	475887	PF3D7_0112300-1	18S+ribosomal+RNA	PF3D7_0112300-1	2149	PF3D7_0112300
Pf3D7_01_v3	474812	C		1074		268	417	142	400	524	155	0.373492	0.2047	0.628819	0.288979	rna_PF3D7_0112300-1	rna_PF3D7_0112300-1	Pf3D7_01_v3	473739	475887	PF3D7_0112300-1	18S+ribosomal+RNA	PF3D7_0112300-1	2149	PF3D7_0112300
Pf3D7_01_v3	474813	A		1075		328	300	310	446	500	329	0.631569	0.608293	0.733632	0.633862	rna_PF3D7_0112300-1	rna_PF3D7_0112300-1	Pf3D7_01_v3	473739	475887	PF3D7_0112300-1	18S+ribosomal+RNA	PF3D7_0112300-1	2149	PF3D7_0112300
Pf3D7_01_v3	474814	A		1076		195	68	233	253	66	235	1.62103	1.96391	3.02359	3.27909	rna_PF3D7_0112300-1	rna_PF3D7_0112300-1	Pf3D7_01_v3	473739	475887	PF3D7_0112300-1	18S+ribosomal+RNA	PF3D7_0112300-1	2149	PF3D7_0112300
Pf3D7_01_v3	474815	G		1077		264	72	618	375	76	735	2.0638	4.86733	3.89719	8.86825	rna_PF3D7_0112300-1	rna_PF3D7_0112300-1	Pf3D7_01_v3	473739	475887	PF3D7_0112300-1	18S+ribosomal+RNA	PF3D7_0112300-1	2149	PF3D7_0112300
Pf3D7_01_v3	474816	A		1078		317	296	524	506	415	642	0.618879	1.03534	0.999949	1.47896	rna_PF3D7_0112300-1	rna_PF3D7_0112300-1	Pf3D7_01_v3	473739	475887	PF3D7_0112300-1	18S+ribosomal+RNA	PF3D7_0112300-1	2149	PF3D7_0112300
Pf3D7_01_v3	474817	A		1079		82	59	59	149	53	104	0.807718	0.604304	2.21569	1.821	rna_PF3D7_0112300-1	rna_PF3D7_0112300-1	Pf3D7_01_v3	473739	475887	PF3D7_0112300-1	18S+ribosomal+RNA	PF3D7_0112300-1	2149	PF3D7_0112300
Pf3D7_01_v3	474818	C		1080		119	96	133	154	123	160	0.720416	0.81603	1.02598	1.23978	rna_PF3D7_0112300-1	rna_PF3D7_0112300-1	Pf3D7_01_v3	473739	475887	PF3D7_0112300-1	18S+ribosomal+RNA	PF3D7_0112300-1	2149	PF3D7_0112300
Pf3D7_01_v3	474819	G		1081		178	46	351	248	46	448	2.15093	4.26054	4.15282	8.68451	rna_PF3D7_0112300-1	rna_PF3D7_0112300-1	Pf3D7_01_v3	473739	475887	PF3D7_0112300-1	18S+ribosomal+RNA	PF3D7_0112300-1	2149	PF3D7_0112300
Pf3D7_01_v3	474820	A		1082		235	173	474	358	282	553	0.78388	1.5931	1.04058	1.86843	rna_PF3D7_0112300-1	rna_PF3D7_0112300-1	Pf3D7_01_v3	473739	475887	PF3D7_0112300-1	18S+ribosomal+RNA	PF3D7_0112300-1	2149	PF3D7_0112300
Pf3D7_01_v3	474821	A		1083		252	133	384	238	265	401	1.08652	1.67457	0.740397	1.44452	rna_PF3D7_0112300-1	rna_PF3D7_0112300-1	Pf3D7_01_v3	473739	475887	PF3D7_0112300-1	18S+ribosomal+RNA	PF3D7_0112300-1	2149	PF3D7_0112300
Pf3D7_01_v3	474822	A		1084		179	122	225	242	183	262	0.846424	1.07715	1.08275	1.36511	rna_PF3D7_0112300-1	rna_PF3D7_0112300-1	Pf3D7_01_v3	473739	475887	PF3D7_0112300-1	18S+ribosomal+RNA	PF3D7_0112300-1	2149	PF3D7_0112300
Pf3D7_01_v3	474823	G		1085		199	136	157	265	215	155	0.843822	0.682092	1.01065	0.696865	rna_PF3D7_0112300-1	rna_PF3D7_0112300-1	Pf3D7_01_v3	473739	475887	PF3D7_0112300-1	18S+ribosomal+RNA	PF3D7_0112300-1	2149	PF3D7_0112300
Pf3D7_01_v3	474824	T		1086		206	51	140	315	63	173	2.24985	1.57369	3.91895	2.53764	rna_PF3D7_0112300-1	rna_PF3D7_0112300-1	Pf3D7_01_v3	473739	475887	PF3D7_0112300-1	18S+ribosomal+RNA	PF3D7_0112300-1	2149	PF3D7_0112300
Pf3D7_01_v3	474825	T		1087		231	137	216	371	206	253	0.969207	0.923994	1.4681	1.17442	rna_PF3D7_0112300-1	rna_PF3D7_0112300-1	Pf3D7_01_v3	473739	475887	PF3D7_0112300-1	18S+ribosomal+RNA	PF3D7_0112300-1	2149	PF3D7_0112300
Pf3D7_01_v3	474826	A		1088		234	102	157	317	178	186	1.3091	0.903229	1.45062	1.00201	rna_PF3D7_0112300-1	rna_PF3D7_0112300-1	Pf3D7_01_v3	473739	475887	PF3D7_0112300-1	18S+ribosomal+RNA	PF3D7_0112300-1	2149	PF3D7_0112300
Pf3D7_01_v3	474827	A		1089		113	17	73	158	34	77	3.41093	2.29367	3.52052	2.05062	rna_PF3D7_0112300-1	rna_PF3D7_0112300-1	Pf3D7_01_v3	473739	475887	PF3D7_0112300-1	18S+ribosomal+RNA	PF3D7_0112300-1	2149	PF3D7_0112300
Pf3D7_01_v3	474828	G		1090		103	14	41	136	20	58	3.67696	1.5919	4.82674	2.4891	rna_PF3D7_0112300-1	rna_PF3D7_0112300-1	Pf3D7_01_v3	473739	475887	PF3D7_0112300-1	18S+ribosomal+RNA	PF3D7_0112300-1	2149	PF3D7_0112300
Pf3D7_01_v3	474829	G		1091		84	21	80	118	28	71	2.14158	2.0809	3.15456	2.25582	rna_PF3D7_0112300-1	rna_PF3D7_0112300-1	Pf3D7_01_v3	473739	475887	PF3D7_0112300-1	18S+ribosomal+RNA	PF3D7_0112300-1	2149	PF3D7_0112300
Pf3D7_01_v3	474830	G		1092		116	50	178	178	83	187	1.3146	2.02393	1.72458	2.10819	rna_PF3D7_0112300-1	rna_PF3D7_0112300-1	Pf3D7_01_v3	473739	475887	PF3D7_0112300-1	18S+ribosomal+RNA	PF3D7_0112300-1	2149	PF3D7_0112300
Pf3D7_01_v3	474831	A		1093		124	46	204	154	67	163	1.51623	2.50082	1.83612	2.2593	rna_PF3D7_0112300-1	rna_PF3D7_0112300-1	Pf3D7_01_v3	473739	475887	PF3D7_0112300-1	18S+ribosomal+RNA	PF3D7_0112300-1	2149	PF3D7_0112300
Pf3D7_01_v3	474832	G		1094		108	46	239	165	90	262	1.32817	2.9198	1.48253	2.71684	rna_PF3D7_0112300-1	rna_PF3D7_0112300-1	Pf3D7_01_v3	473739	475887	PF3D7_0112300-1	18S+ribosomal+RNA	PF3D7_0112300-1	2149	PF3D7_0112300
Pf3D7_01_v3	474833	T		1095		93	18	136	126	36	213	2.69709	3.94965	2.68674	5.21485	rna_PF3D7_0112300-1	rna_PF3D7_0112300-1	Pf3D7_01_v3	473739	475887	PF3D7_0112300-1	18S+ribosomal+RNA	PF3D7_0112300-1	2149	PF3D7_0112300
Pf3D7_01_v3	474834	G		1096		136	77	307	224	115	323	1.01405	2.28465	1.57775	2.63759	rna_PF3D7_0112300-1	rna_PF3D7_0112300-1	Pf3D7_01_v3	473739	475887	PF3D7_0112300-1	18S+ribosomal+RNA	PF3D7_0112300-1	2149	PF3D7_0112300
Pf3D7_01_v3	474835	A		1097		108	28	219	169	60	210	2.10255	4.24318	2.22966	3.21183	rna_PF3D7_0112300-1	rna_PF3D7_0112300-1	Pf3D7_01_v3	473739	475887	PF3D7_0112300-1	18S+ribosomal+RNA	PF3D7_0112300-1	2149	PF3D7_0112300
Pf3D7_01_v3	474836	A		1098		66	19	95	112	31	119	1.86467	2.6724	2.74264	3.38017	rna_PF3D7_0112300-1	rna_PF3D7_0112300-1	Pf3D7_01_v3	473739	475887	PF3D7_0112300-1	18S+ribosomal+RNA	PF3D7_0112300-1	2149	PF3D7_0112300
Pf3D7_01_v3	474837	G		1099		70	44	41	154	80	63	0.919141	0.573023	1.55169	0.766611	rna_PF3D7_0112300-1	rna_PF3D7_0112300-1	Pf3D7_01_v3	473739	475887	PF3D7_0112300-1	18S+ribosomal+RNA	PF3D7_0112300-1	2149	PF3D7_0112300
Pf3D7_01_v3	474838	A		1100		63	22	18	82	60	19	1.57048	0.538871	1.11342	0.346372	rna_PF3D7_0112300-1	rna_PF3D7_0112300-1	Pf3D7_01_v3	473739	475887	PF3D7_0112300-1	18S+ribosomal+RNA	PF3D7_0112300-1	2149	PF3D7_0112300
Pf3D7_01_v3	474839	C		1101		53	7	11	35	6	19	3.37483	0.942814	3.28871	2.23186	rna_PF3D7_0112300-1	rna_PF3D7_0112300-1	Pf3D7_01_v3	473739	475887	PF3D7_0112300-1	18S+ribosomal+RNA	PF3D7_0112300-1	2149	PF3D7_0112300
Pf3D7_01_v3	474840	G		1102		65	18	33	98	56	44	1.92649	1.06259	1.40673	0.769592	rna_PF3D7_0112300-1	rna_PF3D7_0112300-1	Pf3D7_01_v3	473739	475887	PF3D7_0112300-1	18S+ribosomal+RNA	PF3D7_0112300-1	2149	PF3D7_0112300
Pf3D7_01_v3	474841	A		1103		68	30	43	97	65	58	1.27565	0.852665	1.21113	0.86389	rna_PF3D7_0112300-1	rna_PF3D7_0112300-1	Pf3D7_01_v3	473739	475887	PF3D7_0112300-1	18S+ribosomal+RNA	PF3D7_0112300-1	2149	PF3D7_0112300
Pf3D7_01_v3	474842	T		1104		41	14	35	74	41	63	1.56611	1.38385	1.4383	1.43219	rna_PF3D7_0112300-1	rna_PF3D7_0112300-1	Pf3D7_01_v3	473739	475887	PF3D7_0112300-1	18S+ribosomal+RNA	PF3D7_0112300-1	2149	PF3D7_0112300
Pf3D7_01_v3	474843	C		1105		25	17	80	48	22	91	0.867186	2.49975	1.66997	3.51793	rna_PF3D7_0112300-1	rna_PF3D7_0112300-1	Pf3D7_01_v3	473739	475887	PF3D7_0112300-1	18S+ribosomal+RNA	PF3D7_0112300-1	2149	PF3D7_0112300
Pf3D7_01_v3	474844	A		1106		22	7	34	52	24	61	1.57104	2.30584	1.66784	2.23553	rna_PF3D7_0112300-1	rna_PF3D7_0112300-1	Pf3D7_01_v3	473739	475887	PF3D7_0112300-1	18S+ribosomal+RNA	PF3D7_0112300-1	2149	PF3D7_0112300
Pf3D7_01_v3	474845	G		1107		18	1	76	45	9	87	3.41203	12.2246	3.15985	6.76075	rna_PF3D7_0112300-1	rna_PF3D7_0112300-1	Pf3D7_01_v3	473739	475887	PF3D7_0112300-1	18S+ribosomal+RNA	PF3D7_0112300-1	2149	PF3D7_0112300
Pf3D7_01_v3	474846	A		1108		14	3	33	24	6	41	1.85863	3.7769	2.37931	4.35857	rna_PF3D7_0112300-1	rna_PF3D7_0112300-1	Pf3D7_01_v3	473739	475887	PF3D7_0112300-1	18S+ribosomal+RNA	PF3D7_0112300-1	2149	PF3D7_0112300
Pf3D7_01_v3	474847	T		1109		3	0	19	12	15	33	1.6	4.87021	0.727346	1.87978	rna_PF3D7_0112300-1	rna_PF3D7_0112300-1	Pf3D7_01_v3	473739	475887	PF3D7_0112300-1	18S+ribosomal+RNA	PF3D7_0112300-1	2149	PF3D7_0112300
Pf3D7_01_v3	474848	A		1110		0	0	2	4	5	4	1	1.40739	0.807227	0.869486	rna_PF3D7_0112300-1	rna_PF3D7_0112300-1	Pf3D7_01_v3	473739	475887	PF3D7_0112300-1	18S+ribosomal+RNA	PF3D7_0112300-1	2149	PF3D7_0112300
Pf3D7_01_v3	474849	C		1111		0	0	1	2	2	3	1	1.2037	0.939228	1.14812	rna_PF3D7_0112300-1	rna_PF3D7_0112300-1	Pf3D7_01_v3	473739	475887	PF3D7_0112300-1	18S+ribosomal+RNA	PF3D7_0112300-1	2149	PF3D7_0112300
Pf3D7_01_v3	474850	C		1112		0	0	0	5	0	1	1	1	2.04607	1.24463	rna_PF3D7_0112300-1	rna_PF3D7_0112300-1	Pf3D7_01_v3	473739	475887	PF3D7_0112300-1	18S+ribosomal+RNA	PF3D7_0112300-1	2149	PF3D7_0112300
Pf3D7_01_v3	474851	G		1113		0	0	1	7	7	0	1	1.2037	0.88469	0.358975	rna_PF3D7_0112300-1	rna_PF3D7_0112300-1	Pf3D7_01_v3	473739	475887	PF3D7_0112300-1	18S+ribosomal+RNA	PF3D7_0112300-1	2149	PF3D7_0112300
Pf3D7_01_v3	474852	T		1114		0	0	0	1	0	0	1	1	1.20921	1	rna_PF3D7_0112300-1	rna_PF3D7_0112300-1	Pf3D7_01_v3	473739	475887	PF3D7_0112300-1	18S+ribosomal+RNA	PF3D7_0112300-1	2149	PF3D7_0112300
Pf3D7_01_v3	474853	C		1115		0	0	0	3	0	1	1	1	1.62764	1.24463	rna_PF3D7_0112300-1	rna_PF3D7_0112300-1	Pf3D7_01_v3	473739	475887	PF3D7_0112300-1	18S+ribosomal+RNA	PF3D7_0112300-1	2149	PF3D7_0112300
Pf3D7_01_v3	474854	G		1116		0	0	0	6	7	5	1	1	0.809587	0.798055	rna_PF3D7_0112300-1	rna_PF3D7_0112300-1	Pf3D7_01_v3	473739	475887	PF3D7_0112300-1	18S+ribosomal+RNA	PF3D7_0112300-1	2149	PF3D7_0112300
Pf3D7_01_v3	474855	T		1117		0	0	0	6	0	9	1	1	2.25528	3.20168	rna_PF3D7_0112300-1	rna_PF3D7_0112300-1	Pf3D7_01_v3	473739	475887	PF3D7_0112300-1	18S+ribosomal+RNA	PF3D7_0112300-1	2149	PF3D7_0112300
Pf3D7_01_v3	474856	A		1118		0	0	1	9	3	18	1	1.2037	1.6331	3.06086	rna_PF3D7_0112300-1	rna_PF3D7_0112300-1	Pf3D7_01_v3	473739	475887	PF3D7_0112300-1	18S+ribosomal+RNA	PF3D7_0112300-1	2149	PF3D7_0112300
Pf3D7_01_v3	474857	A		1119		0	0	0	8	6	4	1	1	1.05654	0.781836	rna_PF3D7_0112300-1	rna_PF3D7_0112300-1	Pf3D7_01_v3	473739	475887	PF3D7_0112300-1	18S+ribosomal+RNA	PF3D7_0112300-1	2149	PF3D7_0112300
Pf3D7_01_v3	474858	T		1120		0	0	0	5	3	1	1	1	1.15904	0.705051	rna_PF3D7_0112300-1	rna_PF3D7_0112300-1	Pf3D7_01_v3	473739	475887	PF3D7_0112300-1	18S+ribosomal+RNA	PF3D7_0112300-1	2149	PF3D7_0112300
Pf3D7_01_v3	474859	C		1121		1	0	0	2	11	6	1.2	1	0.37267	0.648373	rna_PF3D7_0112300-1	rna_PF3D7_0112300-1	Pf3D7_01_v3	473739	475887	PF3D7_0112300-1	18S+ribosomal+RNA	PF3D7_0112300-1	2149	PF3D7_0112300
Pf3D7_01_v3	474860	T		1122		0	0	1	4	3	12	1	1.2037	1.04053	2.2294	rna_PF3D7_0112300-1	rna_PF3D7_0112300-1	Pf3D7_01_v3	473739	475887	PF3D7_0112300-1	18S+ribosomal+RNA	PF3D7_0112300-1	2149	PF3D7_0112300
Pf3D7_01_v3	474861	T		1123		2	0	2	10	2	15	1.4	1.40739	2.04749	3.09194	rna_PF3D7_0112300-1	rna_PF3D7_0112300-1	Pf3D7_01_v3	473739	475887	PF3D7_0112300-1	18S+ribosomal+RNA	PF3D7_0112300-1	2149	PF3D7_0112300
Pf3D7_01_v3	474862	A		1124		0	1	0	6	6	9	0.741745	0.741745	0.891199	1.26518	rna_PF3D7_0112300-1	rna_PF3D7_0112300-1	Pf3D7_01_v3	473739	475887	PF3D7_0112300-1	18S+ribosomal+RNA	PF3D7_0112300-1	2149	PF3D7_0112300
Pf3D7_01_v3	474863	A		1125		0	2	1	5	5	3	0.589503	0.709582	0.899168	0.76198	rna_PF3D7_0112300-1	rna_PF3D7_0112300-1	Pf3D7_01_v3	473739	475887	PF3D7_0112300-1	18S+ribosomal+RNA	PF3D7_0112300-1	2149	PF3D7_0112300
Pf3D7_01_v3	474864	C		1126		1	0	0	1	2	2	1.2	1	0.800695	0.986133	rna_PF3D7_0112300-1	rna_PF3D7_0112300-1	Pf3D7_01_v3	473739	475887	PF3D7_0112300-1	18S+ribosomal+RNA	PF3D7_0112300-1	2149	PF3D7_0112300
Pf3D7_01_v3	474865	C		1127		0	1	1	9	5	10	0.741745	0.892835	1.26693	1.51452	rna_PF3D7_0112300-1	rna_PF3D7_0112300-1	Pf3D7_01_v3	473739	475887	PF3D7_0112300-1	18S+ribosomal+RNA	PF3D7_0112300-1	2149	PF3D7_0112300
Pf3D7_01_v3	474866	A		1128		0	0	1	8	8	12	1	1.2037	0.879272	1.29425	rna_PF3D7_0112300-1	rna_PF3D7_0112300-1	Pf3D7_01_v3	473739	475887	PF3D7_0112300-1	18S+ribosomal+RNA	PF3D7_0112300-1	2149	PF3D7_0112300
Pf3D7_01_v3	474867	T		1129		0	1	6	7	0	12	0.741745	1.64828	2.46449	3.93557	rna_PF3D7_0112300-1	rna_PF3D7_0112300-1	Pf3D7_01_v3	473739	475887	PF3D7_0112300-1	18S+ribosomal+RNA	PF3D7_0112300-1	2149	PF3D7_0112300
Pf3D7_01_v3	474868	A		1130		1	2	5	10	8	12	0.707403	1.1899	1.01688	1.29425	rna_PF3D7_0112300-1	rna_PF3D7_0112300-1	Pf3D7_01_v3	473739	475887	PF3D7_0112300-1	18S+ribosomal+RNA	PF3D7_0112300-1	2149	PF3D7_0112300
Pf3D7_01_v3	474869	A		1131		0	0	0	11	5	16	1	1	1.45082	2.15956	rna_PF3D7_0112300-1	rna_PF3D7_0112300-1	Pf3D7_01_v3	473739	475887	PF3D7_0112300-1	18S+ribosomal+RNA	PF3D7_0112300-1	2149	PF3D7_0112300
Pf3D7_01_v3	474870	A		1132		0	0	0	6	3	2	1	1	1.27756	0.843628	rna_PF3D7_0112300-1	rna_PF3D7_0112300-1	Pf3D7_01_v3	473739	475887	PF3D7_0112300-1	18S+ribosomal+RNA	PF3D7_0112300-1	2149	PF3D7_0112300
Pf3D7_01_v3	474871	C		1133		0	0	3	4	11	12	1	1.61109	0.482605	1.03401	rna_PF3D7_0112300-1	rna_PF3D7_0112300-1	Pf3D7_01_v3	473739	475887	PF3D7_0112300-1	18S+ribosomal+RNA	PF3D7_0112300-1	2149	PF3D7_0112300
Pf3D7_01_v3	474872	T		1134		1	2	2	9	6	16	0.707403	0.829661	1.13922	1.94186	rna_PF3D7_0112300-1	rna_PF3D7_0112300-1	Pf3D7_01_v3	473739	475887	PF3D7_0112300-1	18S+ribosomal+RNA	PF3D7_0112300-1	2149	PF3D7_0112300
Pf3D7_01_v3	474873	A		1135		3	0	1	8	0	8	1.6	1.2037	2.6737	2.95704	rna_PF3D7_0112300-1	rna_PF3D7_0112300-1	Pf3D7_01_v3	473739	475887	PF3D7_0112300-1	18S+ribosomal+RNA	PF3D7_0112300-1	2149	PF3D7_0112300
Pf3D7_01_v3	474874	T		1136		2	0	1	3	10	20	1.4	1.2037	0.458358	1.65941	rna_PF3D7_0112300-1	rna_PF3D7_0112300-1	Pf3D7_01_v3	473739	475887	PF3D7_0112300-1	18S+ribosomal+RNA	PF3D7_0112300-1	2149	PF3D7_0112300
Pf3D7_01_v3	474875	A		1137		0	0	0	4	1	6	1	1	1.46351	1.9662	rna_PF3D7_0112300-1	rna_PF3D7_0112300-1	Pf3D7_01_v3	473739	475887	PF3D7_0112300-1	18S+ribosomal+RNA	PF3D7_0112300-1	2149	PF3D7_0112300
Pf3D7_01_v3	474876	C		1138		0	0	0	4	0	0	1	1	1.83685	1	rna_PF3D7_0112300-1	rna_PF3D7_0112300-1	Pf3D7_01_v3	473739	475887	PF3D7_0112300-1	18S+ribosomal+RNA	PF3D7_0112300-1	2149	PF3D7_0112300
Pf3D7_01_v3	474877	C		1139		0	0	0	2	4	2	1	1	0.70205	0.737109	rna_PF3D7_0112300-1	rna_PF3D7_0112300-1	Pf3D7_01_v3	473739	475887	PF3D7_0112300-1	18S+ribosomal+RNA	PF3D7_0112300-1	2149	PF3D7_0112300
Pf3D7_01_v3	474878	G		1140		1	0	1	8	1	3	1.2	1.2037	2.13027	1.38148	rna_PF3D7_0112300-1	rna_PF3D7_0112300-1	Pf3D7_01_v3	473739	475887	PF3D7_0112300-1	18S+ribosomal+RNA	PF3D7_0112300-1	2149	PF3D7_0112300
Pf3D7_01_v3	474879	A		1141		0	0	1	3	1	3	1	1.2037	1.29682	1.38148	rna_PF3D7_0112300-1	rna_PF3D7_0112300-1	Pf3D7_01_v3	473739	475887	PF3D7_0112300-1	18S+ribosomal+RNA	PF3D7_0112300-1	2149	PF3D7_0112300
Pf3D7_01_v3	474880	C		1142		3	0	1	6	3	6	1.6	1.2037	1.27756	1.39794	rna_PF3D7_0112300-1	rna_PF3D7_0112300-1	Pf3D7_01_v3	473739	475887	PF3D7_0112300-1	18S+ribosomal+RNA	PF3D7_0112300-1	2149	PF3D7_0112300
Pf3D7_01_v3	474881	T		1143		0	0	2	5	2	4	1	1.40739	1.35483	1.3101	rna_PF3D7_0112300-1	rna_PF3D7_0112300-1	Pf3D7_01_v3	473739	475887	PF3D7_0112300-1	18S+ribosomal+RNA	PF3D7_0112300-1	2149	PF3D7_0112300
Pf3D7_01_v3	474882	A		1144		0	0	0	0	0	3	1	1	1	1.73389	rna_PF3D7_0112300-1	rna_PF3D7_0112300-1	Pf3D7_01_v3	473739	475887	PF3D7_0112300-1	18S+ribosomal+RNA	PF3D7_0112300-1	2149	PF3D7_0112300
Pf3D7_01_v3	474883	G		1145		2	0	2	5	0	12	1.4	1.40739	2.04607	3.93557	rna_PF3D7_0112300-1	rna_PF3D7_0112300-1	Pf3D7_01_v3	473739	475887	PF3D7_0112300-1	18S+ribosomal+RNA	PF3D7_0112300-1	2149	PF3D7_0112300
Pf3D7_01_v3	474884	G		1146		0	0	0	2	1	3	1	1	1.13013	1.38148	rna_PF3D7_0112300-1	rna_PF3D7_0112300-1	Pf3D7_01_v3	473739	475887	PF3D7_0112300-1	18S+ribosomal+RNA	PF3D7_0112300-1	2149	PF3D7_0112300
Pf3D7_01_v3	474885	T		1147		0	0	0	0	0	1	1	1	1	1.24463	rna_PF3D7_0112300-1	rna_PF3D7_0112300-1	Pf3D7_01_v3	473739	475887	PF3D7_0112300-1	18S+ribosomal+RNA	PF3D7_0112300-1	2149	PF3D7_0112300
Pf3D7_01_v3	474886	G		1148		1	1	0	4	0	2	0.890094	0.741745	1.83685	1.48926	rna_PF3D7_0112300-1	rna_PF3D7_0112300-1	Pf3D7_01_v3	473739	475887	PF3D7_0112300-1	18S+ribosomal+RNA	PF3D7_0112300-1	2149	PF3D7_0112300
Pf3D7_01_v3	474887	T		1149		0	0	1	2	3	0	1	1.2037	0.803502	0.566474	rna_PF3D7_0112300-1	rna_PF3D7_0112300-1	Pf3D7_01_v3	473739	475887	PF3D7_0112300-1	18S+ribosomal+RNA	PF3D7_0112300-1	2149	PF3D7_0112300
Pf3D7_01_v3	474888	T		1150		0	0	0	3	1	0	1	1	1.29682	0.796748	rna_PF3D7_0112300-1	rna_PF3D7_0112300-1	Pf3D7_01_v3	473739	475887	PF3D7_0112300-1	18S+ribosomal+RNA	PF3D7_0112300-1	2149	PF3D7_0112300
Pf3D7_01_v3	474889	G		1151		0	0	0	2	0	0	1	1	1.41843	1	rna_PF3D7_0112300-1	rna_PF3D7_0112300-1	Pf3D7_01_v3	473739	475887	PF3D7_0112300-1	18S+ribosomal+RNA	PF3D7_0112300-1	2149	PF3D7_0112300
Pf3D7_01_v3	474890	G		1152		0	0	1	4	3	9	1	1.2037	1.04053	1.81367	rna_PF3D7_0112300-1	rna_PF3D7_0112300-1	Pf3D7_01_v3	473739	475887	PF3D7_0112300-1	18S+ribosomal+RNA	PF3D7_0112300-1	2149	PF3D7_0112300
Pf3D7_01_v3	474891	A		1153		0	0	0	2	0	2	1	1	1.41843	1.48926	rna_PF3D7_0112300-1	rna_PF3D7_0112300-1	Pf3D7_01_v3	473739	475887	PF3D7_0112300-1	18S+ribosomal+RNA	PF3D7_0112300-1	2149	PF3D7_0112300
Pf3D7_01_v3	474892	T		1154		0	0	0	2	0	1	1	1	1.41843	1.24463	rna_PF3D7_0112300-1	rna_PF3D7_0112300-1	Pf3D7_01_v3	473739	475887	PF3D7_0112300-1	18S+ribosomal+RNA	PF3D7_0112300-1	2149	PF3D7_0112300
Pf3D7_01_v3	474893	G		1155		1	0	2	8	1	2	1.2	1.40739	2.13027	1.18657	rna_PF3D7_0112300-1	rna_PF3D7_0112300-1	Pf3D7_01_v3	473739	475887	PF3D7_0112300-1	18S+ribosomal+RNA	PF3D7_0112300-1	2149	PF3D7_0112300
Pf3D7_01_v3	474894	A		1156		0	0	3	7	3	12	1	1.61109	1.39607	2.2294	rna_PF3D7_0112300-1	rna_PF3D7_0112300-1	Pf3D7_01_v3	473739	475887	PF3D7_0112300-1	18S+ribosomal+RNA	PF3D7_0112300-1	2149	PF3D7_0112300
Pf3D7_01_v3	474895	A		1157		0	1	0	1	3	5	0.741745	0.741745	0.684988	1.25936	rna_PF3D7_0112300-1	rna_PF3D7_0112300-1	Pf3D7_01_v3	473739	475887	PF3D7_0112300-1	18S+ribosomal+RNA	PF3D7_0112300-1	2149	PF3D7_0112300
Pf3D7_01_v3	474896	T		1158		0	3	1	7	8	5	0.489113	0.588743	0.810471	0.731104	rna_PF3D7_0112300-1	rna_PF3D7_0112300-1	Pf3D7_01_v3	473739	475887	PF3D7_0112300-1	18S+ribosomal+RNA	PF3D7_0112300-1	2149	PF3D7_0112300
[truncated: 1,071 more rows]

## Sheet: PF3D7_0531600 .A2-18s
						raw read						icSHAPE scores
Chromsome	Pos	Base	5-UTR	ATG	3-UTR	SHLR-1	SHLR-2	SHLR-3	SHLR-4	SHLR-5	SHLR-6	late 37 in vivo	late 37 in vitro	late 26 in vivo	late 26 in vitro	Gene_t	Triscription_ID	Chr	Gene.sta	Gene.end	Name	Description	Description.1	Size	Parent_gene
Pf3D7_05_v3	1287603	G	-1998			0	0	0	0	0	0	1	1	1	1	NA	NA	NA	NA	NA	NA	NA	NA	NA	NA
Pf3D7_05_v3	1287607	A	-1994			0	0	0	0	0	0	1	1	1	1	NA	NA	NA	NA	NA	NA	NA	NA	NA	NA
Pf3D7_05_v3	1287611	T	-1990			0	0	0	0	0	0	1	1	1	1	NA	NA	NA	NA	NA	NA	NA	NA	NA	NA
Pf3D7_05_v3	1287614	T	-1987			0	0	0	0	0	0	1	1	1	1	NA	NA	NA	NA	NA	NA	NA	NA	NA	NA
Pf3D7_05_v3	1287617	A	-1984			0	0	0	0	0	0	1	1	1	1	NA	NA	NA	NA	NA	NA	NA	NA	NA	NA
Pf3D7_05_v3	1287619	G	-1982			0	0	0	0	0	0	1	1	1	1	NA	NA	NA	NA	NA	NA	NA	NA	NA	NA
Pf3D7_05_v3	1287625	T	-1976			0	0	0	0	0	0	1	1	1	1	NA	NA	NA	NA	NA	NA	NA	NA	NA	NA
Pf3D7_05_v3	1287627	A	-1974			0	0	0	0	0	0	1	1	1	1	NA	NA	NA	NA	NA	NA	NA	NA	NA	NA
Pf3D7_05_v3	1287628	T	-1973			0	0	0	0	0	0	1	1	1	1	NA	NA	NA	NA	NA	NA	NA	NA	NA	NA
Pf3D7_05_v3	1287634	A	-1967			0	0	0	0	0	0	1	1	1	1	NA	NA	NA	NA	NA	NA	NA	NA	NA	NA
Pf3D7_05_v3	1287637	G	-1964			0	0	0	0	0	0	1	1	1	1	NA	NA	NA	NA	NA	NA	NA	NA	NA	NA
Pf3D7_05_v3	1287638	G	-1963			0	0	0	0	0	0	1	1	1	1	NA	NA	NA	NA	NA	NA	NA	NA	NA	NA
Pf3D7_05_v3	1287640	A	-1961			0	0	0	0	0	0	1	1	1	1	NA	NA	NA	NA	NA	NA	NA	NA	NA	NA
Pf3D7_05_v3	1287651	A	-1950			0	0	0	0	0	0	1	1	1	1	NA	NA	NA	NA	NA	NA	NA	NA	NA	NA
Pf3D7_05_v3	1287653	A	-1948			0	0	0	0	0	0	1	1	1	1	NA	NA	NA	NA	NA	NA	NA	NA	NA	NA
Pf3D7_05_v3	1287664	A	-1937			0	0	0	0	0	0	1	1	1	1	NA	NA	NA	NA	NA	NA	NA	NA	NA	NA
Pf3D7_05_v3	1287667	A	-1934			0	0	0	0	0	0	1	1	1	1	NA	NA	NA	NA	NA	NA	NA	NA	NA	NA
Pf3D7_05_v3	1287676	A	-1925			0	0	0	0	0	0	1	1	1	1	NA	NA	NA	NA	NA	NA	NA	NA	NA	NA
Pf3D7_05_v3	1287679	A	-1922			0	0	0	0	0	0	1	1	1	1	NA	NA	NA	NA	NA	NA	NA	NA	NA	NA
Pf3D7_05_v3	1287681	A	-1920			0	0	0	0	0	0	1	1	1	1	NA	NA	NA	NA	NA	NA	NA	NA	NA	NA
Pf3D7_05_v3	1287683	A	-1918			0	0	0	0	0	0	1	1	1	1	NA	NA	NA	NA	NA	NA	NA	NA	NA	NA
Pf3D7_05_v3	1287685	A	-1916			0	0	0	0	0	0	1	1	1	1	NA	NA	NA	NA	NA	NA	NA	NA	NA	NA
Pf3D7_05_v3	1287686	T	-1915			0	0	0	0	0	0	1	1	1	1	NA	NA	NA	NA	NA	NA	NA	NA	NA	NA
Pf3D7_05_v3	1287689	T	-1912			0	0	0	0	0	0	1	1	1	1	NA	NA	NA	NA	NA	NA	NA	NA	NA	NA
Pf3D7_05_v3	1287690	T	-1911			0	0	0	0	0	0	1	1	1	1	NA	NA	NA	NA	NA	NA	NA	NA	NA	NA
Pf3D7_05_v3	1287692	T	-1909			0	0	0	0	0	0	1	1	1	1	NA	NA	NA	NA	NA	NA	NA	NA	NA	NA
Pf3D7_05_v3	1287694	T	-1907			0	0	0	0	0	0	1	1	1	1	NA	NA	NA	NA	NA	NA	NA	NA	NA	NA
Pf3D7_05_v3	1287695	A	-1906			0	0	0	0	0	0	1	1	1	1	NA	NA	NA	NA	NA	NA	NA	NA	NA	NA
Pf3D7_05_v3	1287696	T	-1905			0	0	0	0	0	0	1	1	1	1	NA	NA	NA	NA	NA	NA	NA	NA	NA	NA
Pf3D7_05_v3	1287697	T	-1904			0	0	0	0	0	0	1	1	1	1	NA	NA	NA	NA	NA	NA	NA	NA	NA	NA
Pf3D7_05_v3	1287698	T	-1903			0	0	0	0	0	0	1	1	1	1	NA	NA	NA	NA	NA	NA	NA	NA	NA	NA
Pf3D7_05_v3	1287700	A	-1901			0	0	0	0	0	0	1	1	1	1	NA	NA	NA	NA	NA	NA	NA	NA	NA	NA
Pf3D7_05_v3	1287701	T	-1900			0	0	0	0	0	0	1	1	1	1	NA	NA	NA	NA	NA	NA	NA	NA	NA	NA
Pf3D7_05_v3	1287702	T	-1899			0	0	0	0	0	0	1	1	1	1	NA	NA	NA	NA	NA	NA	NA	NA	NA	NA
Pf3D7_05_v3	1287712	T	-1889			0	0	0	0	0	0	1	1	1	1	NA	NA	NA	NA	NA	NA	NA	NA	NA	NA
Pf3D7_05_v3	1287717	T	-1884			0	0	0	0	0	0	1	1	1	1	NA	NA	NA	NA	NA	NA	NA	NA	NA	NA
Pf3D7_05_v3	1287720	T	-1881			0	0	0	0	0	0	1	1	1	1	NA	NA	NA	NA	NA	NA	NA	NA	NA	NA
Pf3D7_05_v3	1287721	T	-1880			0	0	0	0	0	0	1	1	1	1	NA	NA	NA	NA	NA	NA	NA	NA	NA	NA
Pf3D7_05_v3	1287723	A	-1878			0	0	0	0	0	0	1	1	1	1	NA	NA	NA	NA	NA	NA	NA	NA	NA	NA
Pf3D7_05_v3	1287724	T	-1877			0	0	0	0	0	0	1	1	1	1	NA	NA	NA	NA	NA	NA	NA	NA	NA	NA
Pf3D7_05_v3	1287726	T	-1875			0	0	0	0	0	0	1	1	1	1	NA	NA	NA	NA	NA	NA	NA	NA	NA	NA
Pf3D7_05_v3	1287730	G	-1871			0	0	0	0	0	0	1	1	1	1	NA	NA	NA	NA	NA	NA	NA	NA	NA	NA
Pf3D7_05_v3	1287735	A	-1866			0	0	0	0	0	0	1	1	1	1	NA	NA	NA	NA	NA	NA	NA	NA	NA	NA
Pf3D7_05_v3	1287736	T	-1865			0	0	0	0	0	0	1	1	1	1	NA	NA	NA	NA	NA	NA	NA	NA	NA	NA
Pf3D7_05_v3	1287738	A	-1863			0	0	0	0	0	0	1	1	1	1	NA	NA	NA	NA	NA	NA	NA	NA	NA	NA
Pf3D7_05_v3	1287744	T	-1857			0	0	0	0	0	0	1	1	1	1	NA	NA	NA	NA	NA	NA	NA	NA	NA	NA
Pf3D7_05_v3	1287745	A	-1856			0	0	0	0	0	0	1	1	1	1	NA	NA	NA	NA	NA	NA	NA	NA	NA	NA
Pf3D7_05_v3	1287747	G	-1854			0	0	0	0	0	0	1	1	1	1	NA	NA	NA	NA	NA	NA	NA	NA	NA	NA
Pf3D7_05_v3	1287749	A	-1852			0	0	0	0	0	0	1	1	1	1	NA	NA	NA	NA	NA	NA	NA	NA	NA	NA
Pf3D7_05_v3	1287751	T	-1850			0	0	0	0	0	0	1	1	1	1	NA	NA	NA	NA	NA	NA	NA	NA	NA	NA
Pf3D7_05_v3	1287754	A	-1847			0	0	0	0	0	0	1	1	1	1	NA	NA	NA	NA	NA	NA	NA	NA	NA	NA
Pf3D7_05_v3	1287762	T	-1839			0	0	0	0	0	0	1	1	1	1	NA	NA	NA	NA	NA	NA	NA	NA	NA	NA
Pf3D7_05_v3	1287763	T	-1838			0	0	0	0	0	0	1	1	1	1	NA	NA	NA	NA	NA	NA	NA	NA	NA	NA
Pf3D7_05_v3	1287764	T	-1837			0	0	0	0	0	0	1	1	1	1	NA	NA	NA	NA	NA	NA	NA	NA	NA	NA
Pf3D7_05_v3	1287766	T	-1835			0	0	0	0	0	0	1	1	1	1	NA	NA	NA	NA	NA	NA	NA	NA	NA	NA
Pf3D7_05_v3	1287769	A	-1832			0	0	0	0	0	0	1	1	1	1	NA	NA	NA	NA	NA	NA	NA	NA	NA	NA
Pf3D7_05_v3	1287772	A	-1829			0	0	0	0	0	0	1	1	1	1	NA	NA	NA	NA	NA	NA	NA	NA	NA	NA
Pf3D7_05_v3	1287773	C	-1828			0	0	0	0	0	0	1	1	1	1	NA	NA	NA	NA	NA	NA	NA	NA	NA	NA
Pf3D7_05_v3	1287775	A	-1826			0	0	0	0	0	0	1	1	1	1	NA	NA	NA	NA	NA	NA	NA	NA	NA	NA
Pf3D7_05_v3	1287779	A	-1822			0	0	0	0	0	0	1	1	1	1	NA	NA	NA	NA	NA	NA	NA	NA	NA	NA
Pf3D7_05_v3	1287780	T	-1821			0	0	0	0	0	0	1	1	1	1	NA	NA	NA	NA	NA	NA	NA	NA	NA	NA
Pf3D7_05_v3	1287783	A	-1818			0	0	0	0	0	0	1	1	1	1	NA	NA	NA	NA	NA	NA	NA	NA	NA	NA
Pf3D7_05_v3	1287785	A	-1816			0	0	0	0	0	0	1	1	1	1	NA	NA	NA	NA	NA	NA	NA	NA	NA	NA
Pf3D7_05_v3	1287791	T	-1810			0	0	0	0	0	0	1	1	1	1	NA	NA	NA	NA	NA	NA	NA	NA	NA	NA
Pf3D7_05_v3	1287792	A	-1809			0	0	0	0	0	0	1	1	1	1	NA	NA	NA	NA	NA	NA	NA	NA	NA	NA
Pf3D7_05_v3	1287795	A	-1806			0	0	0	0	0	0	1	1	1	1	NA	NA	NA	NA	NA	NA	NA	NA	NA	NA
Pf3D7_05_v3	1287796	A	-1805			0	0	0	0	0	0	1	1	1	1	NA	NA	NA	NA	NA	NA	NA	NA	NA	NA
Pf3D7_05_v3	1287797	T	-1804			0	0	0	0	0	0	1	1	1	1	NA	NA	NA	NA	NA	NA	NA	NA	NA	NA
Pf3D7_05_v3	1287798	A	-1803			0	0	0	0	0	0	1	1	1	1	NA	NA	NA	NA	NA	NA	NA	NA	NA	NA
Pf3D7_05_v3	1287800	A	-1801			0	0	0	0	0	0	1	1	1	1	NA	NA	NA	NA	NA	NA	NA	NA	NA	NA
Pf3D7_05_v3	1287802	T	-1799			0	0	0	0	0	0	1	1	1	1	NA	NA	NA	NA	NA	NA	NA	NA	NA	NA
Pf3D7_05_v3	1287803	A	-1798			0	0	0	0	0	0	1	1	1	1	NA	NA	NA	NA	NA	NA	NA	NA	NA	NA
Pf3D7_05_v3	1287806	A	-1795			0	0	0	0	0	0	1	1	1	1	NA	NA	NA	NA	NA	NA	NA	NA	NA	NA
Pf3D7_05_v3	1287810	G	-1791			0	0	0	0	0	0	1	1	1	1	NA	NA	NA	NA	NA	NA	NA	NA	NA	NA
Pf3D7_05_v3	1287813	A	-1788			0	0	0	0	0	0	1	1	1	1	NA	NA	NA	NA	NA	NA	NA	NA	NA	NA
Pf3D7_05_v3	1287814	T	-1787			0	0	0	0	0	0	1	1	1	1	NA	NA	NA	NA	NA	NA	NA	NA	NA	NA
Pf3D7_05_v3	1287822	T	-1779			0	0	0	0	0	0	1	1	1	1	NA	NA	NA	NA	NA	NA	NA	NA	NA	NA
Pf3D7_05_v3	1287824	T	-1777			0	0	0	0	0	0	1	1	1	1	NA	NA	NA	NA	NA	NA	NA	NA	NA	NA
Pf3D7_05_v3	1287826	T	-1775			0	0	0	0	0	0	1	1	1	1	NA	NA	NA	NA	NA	NA	NA	NA	NA	NA
Pf3D7_05_v3	1287831	T	-1770			0	0	0	0	0	0	1	1	1	1	NA	NA	NA	NA	NA	NA	NA	NA	NA	NA
Pf3D7_05_v3	1287832	A	-1769			0	0	0	0	0	0	1	1	1	1	NA	NA	NA	NA	NA	NA	NA	NA	NA	NA
Pf3D7_05_v3	1287834	T	-1767			0	0	0	0	0	0	1	1	1	1	NA	NA	NA	NA	NA	NA	NA	NA	NA	NA
Pf3D7_05_v3	1287836	A	-1765			0	0	0	0	0	0	1	1	1	1	NA	NA	NA	NA	NA	NA	NA	NA	NA	NA
Pf3D7_05_v3	1287841	A	-1760			0	0	0	1	0	0	1	1	1.20921	1	NA	NA	NA	NA	NA	NA	NA	NA	NA	NA
Pf3D7_05_v3	1287846	A	-1755			0	0	0	0	0	0	1	1	1	1	NA	NA	NA	NA	NA	NA	NA	NA	NA	NA
Pf3D7_05_v3	1287847	A	-1754			0	0	0	0	0	0	1	1	1	1	NA	NA	NA	NA	NA	NA	NA	NA	NA	NA
Pf3D7_05_v3	1287848	T	-1753			0	0	0	0	0	0	1	1	1	1	NA	NA	NA	NA	NA	NA	NA	NA	NA	NA
Pf3D7_05_v3	1287852	T	-1749			0	0	0	0	0	0	1	1	1	1	NA	NA	NA	NA	NA	NA	NA	NA	NA	NA
Pf3D7_05_v3	1287853	C	-1748			0	0	0	0	0	0	1	1	1	1	NA	NA	NA	NA	NA	NA	NA	NA	NA	NA
Pf3D7_05_v3	1287858	T	-1743			0	0	0	0	0	0	1	1	1	1	NA	NA	NA	NA	NA	NA	NA	NA	NA	NA
Pf3D7_05_v3	1287859	T	-1742			0	0	0	0	0	0	1	1	1	1	NA	NA	NA	NA	NA	NA	NA	NA	NA	NA
Pf3D7_05_v3	1287861	A	-1740			0	0	0	0	0	0	1	1	1	1	NA	NA	NA	NA	NA	NA	NA	NA	NA	NA
Pf3D7_05_v3	1287863	A	-1738			0	0	0	0	0	0	1	1	1	1	NA	NA	NA	NA	NA	NA	NA	NA	NA	NA
Pf3D7_05_v3	1287866	T	-1735			0	0	0	0	0	0	1	1	1	1	NA	NA	NA	NA	NA	NA	NA	NA	NA	NA
Pf3D7_05_v3	1287867	A	-1734			0	0	0	0	0	0	1	1	1	1	NA	NA	NA	NA	NA	NA	NA	NA	NA	NA
Pf3D7_05_v3	1287868	A	-1733			0	0	0	0	0	0	1	1	1	1	NA	NA	NA	NA	NA	NA	NA	NA	NA	NA
Pf3D7_05_v3	1287869	G	-1732			0	0	0	0	0	0	1	1	1	1	NA	NA	NA	NA	NA	NA	NA	NA	NA	NA
Pf3D7_05_v3	1287870	T	-1731			0	0	0	0	0	0	1	1	1	1	NA	NA	NA	NA	NA	NA	NA	NA	NA	NA
Pf3D7_05_v3	1287871	G	-1730			0	0	0	0	0	0	1	1	1	1	NA	NA	NA	NA	NA	NA	NA	NA	NA	NA
Pf3D7_05_v3	1287873	T	-1728			0	0	0	0	0	0	1	1	1	1	NA	NA	NA	NA	NA	NA	NA	NA	NA	NA
Pf3D7_05_v3	1287875	A	-1726			0	0	0	0	0	0	1	1	1	1	NA	NA	NA	NA	NA	NA	NA	NA	NA	NA
Pf3D7_05_v3	1287877	T	-1724			0	0	0	0	0	0	1	1	1	1	NA	NA	NA	NA	NA	NA	NA	NA	NA	NA
Pf3D7_05_v3	1287879	A	-1722			0	0	0	0	0	0	1	1	1	1	NA	NA	NA	NA	NA	NA	NA	NA	NA	NA
Pf3D7_05_v3	1287882	A	-1719			0	0	0	0	0	0	1	1	1	1	NA	NA	NA	NA	NA	NA	NA	NA	NA	NA
Pf3D7_05_v3	1287886	A	-1715			0	0	0	0	0	0	1	1	1	1	NA	NA	NA	NA	NA	NA	NA	NA	NA	NA
Pf3D7_05_v3	1287889	A	-1712			0	0	0	0	0	0	1	1	1	1	NA	NA	NA	NA	NA	NA	NA	NA	NA	NA
Pf3D7_05_v3	1287890	T	-1711			0	0	0	0	0	0	1	1	1	1	NA	NA	NA	NA	NA	NA	NA	NA	NA	NA
Pf3D7_05_v3	1287893	T	-1708			0	0	0	0	0	0	1	1	1	1	NA	NA	NA	NA	NA	NA	NA	NA	NA	NA
Pf3D7_05_v3	1287894	T	-1707			0	0	0	0	0	0	1	1	1	1	NA	NA	NA	NA	NA	NA	NA	NA	NA	NA
Pf3D7_05_v3	1287895	T	-1706			0	0	0	0	0	0	1	1	1	1	NA	NA	NA	NA	NA	NA	NA	NA	NA	NA
Pf3D7_05_v3	1287896	T	-1705			0	0	0	0	0	0	1	1	1	1	NA	NA	NA	NA	NA	NA	NA	NA	NA	NA
Pf3D7_05_v3	1287897	T	-1704			0	0	0	0	0	0	1	1	1	1	NA	NA	NA	NA	NA	NA	NA	NA	NA	NA
Pf3D7_05_v3	1287898	T	-1703			0	0	0	0	0	0	1	1	1	1	NA	NA	NA	NA	NA	NA	NA	NA	NA	NA
Pf3D7_05_v3	1287900	A	-1701			0	0	0	0	0	0	1	1	1	1	NA	NA	NA	NA	NA	NA	NA	NA	NA	NA
Pf3D7_05_v3	1287901	A	-1700			0	0	0	0	0	0	1	1	1	1	NA	NA	NA	NA	NA	NA	NA	NA	NA	NA
Pf3D7_05_v3	1287902	A	-1699			0	0	0	0	0	0	1	1	1	1	NA	NA	NA	NA	NA	NA	NA	NA	NA	NA
Pf3D7_05_v3	1287904	T	-1697			0	0	0	0	0	0	1	1	1	1	NA	NA	NA	NA	NA	NA	NA	NA	NA	NA
Pf3D7_05_v3	1287905	A	-1696			0	0	0	0	0	0	1	1	1	1	NA	NA	NA	NA	NA	NA	NA	NA	NA	NA
Pf3D7_05_v3	1287906	A	-1695			0	0	0	0	0	0	1	1	1	1	NA	NA	NA	NA	NA	NA	NA	NA	NA	NA
Pf3D7_05_v3	1287908	G	-1693			0	0	0	0	0	0	1	1	1	1	NA	NA	NA	NA	NA	NA	NA	NA	NA	NA
Pf3D7_05_v3	1287909	A	-1692			0	0	0	0	0	0	1	1	1	1	NA	NA	NA	NA	NA	NA	NA	NA	NA	NA
Pf3D7_05_v3	1287916	A	-1685			0	0	0	0	0	0	1	1	1	1	NA	NA	NA	NA	NA	NA	NA	NA	NA	NA
Pf3D7_05_v3	1287921	A	-1680			0	0	0	0	0	0	1	1	1	1	NA	NA	NA	NA	NA	NA	NA	NA	NA	NA
Pf3D7_05_v3	1287922	A	-1679			0	0	0	0	0	0	1	1	1	1	NA	NA	NA	NA	NA	NA	NA	NA	NA	NA
Pf3D7_05_v3	1287923	A	-1678			0	0	0	0	0	0	1	1	1	1	NA	NA	NA	NA	NA	NA	NA	NA	NA	NA
Pf3D7_05_v3	1287927	A	-1674			0	0	0	0	0	0	1	1	1	1	NA	NA	NA	NA	NA	NA	NA	NA	NA	NA
Pf3D7_05_v3	1287928	A	-1673			0	0	0	0	0	0	1	1	1	1	NA	NA	NA	NA	NA	NA	NA	NA	NA	NA
Pf3D7_05_v3	1287930	C	-1671			0	0	0	0	0	0	1	1	1	1	NA	NA	NA	NA	NA	NA	NA	NA	NA	NA
Pf3D7_05_v3	1287932	T	-1669			0	0	0	0	0	0	1	1	1	1	NA	NA	NA	NA	NA	NA	NA	NA	NA	NA
Pf3D7_05_v3	1287933	G	-1668			0	0	0	0	0	0	1	1	1	1	NA	NA	NA	NA	NA	NA	NA	NA	NA	NA
Pf3D7_05_v3	1287938	T	-1663			0	0	0	0	0	0	1	1	1	1	NA	NA	NA	NA	NA	NA	NA	NA	NA	NA
Pf3D7_05_v3	1287944	T	-1657			0	0	0	0	0	0	1	1	1	1	NA	NA	NA	NA	NA	NA	NA	NA	NA	NA
Pf3D7_05_v3	1287948	T	-1653			0	0	0	0	0	0	1	1	1	1	NA	NA	NA	NA	NA	NA	NA	NA	NA	NA
Pf3D7_05_v3	1287950	T	-1651			0	0	0	1	0	0	1	1	1.20921	1	NA	NA	NA	NA	NA	NA	NA	NA	NA	NA
Pf3D7_05_v3	1287955	T	-1646			0	0	0	0	0	0	1	1	1	1	NA	NA	NA	NA	NA	NA	NA	NA	NA	NA
Pf3D7_05_v3	1287959	G	-1642			0	0	0	0	0	0	1	1	1	1	NA	NA	NA	NA	NA	NA	NA	NA	NA	NA
Pf3D7_05_v3	1287961	A	-1640			0	0	0	0	0	0	1	1	1	1	NA	NA	NA	NA	NA	NA	NA	NA	NA	NA
Pf3D7_05_v3	1287965	A	-1636			0	0	0	0	0	0	1	1	1	1	NA	NA	NA	NA	NA	NA	NA	NA	NA	NA
Pf3D7_05_v3	1287968	T	-1633			0	0	0	0	0	0	1	1	1	1	NA	NA	NA	NA	NA	NA	NA	NA	NA	NA
Pf3D7_05_v3	1287976	T	-1625			0	0	0	0	0	0	1	1	1	1	NA	NA	NA	NA	NA	NA	NA	NA	NA	NA
Pf3D7_05_v3	1287977	A	-1624			0	0	0	0	0	0	1	1	1	1	NA	NA	NA	NA	NA	NA	NA	NA	NA	NA
Pf3D7_05_v3	1287980	T	-1621			0	0	0	0	0	0	1	1	1	1	NA	NA	NA	NA	NA	NA	NA	NA	NA	NA
Pf3D7_05_v3	1287983	A	-1618			0	0	0	0	0	0	1	1	1	1	NA	NA	NA	NA	NA	NA	NA	NA	NA	NA
Pf3D7_05_v3	1287984	T	-1617			0	0	0	0	0	0	1	1	1	1	NA	NA	NA	NA	NA	NA	NA	NA	NA	NA
Pf3D7_05_v3	1287985	A	-1616			0	0	0	0	0	0	1	1	1	1	NA	NA	NA	NA	NA	NA	NA	NA	NA	NA
Pf3D7_05_v3	1287989	G	-1612			0	0	0	0	0	0	1	1	1	1	NA	NA	NA	NA	NA	NA	NA	NA	NA	NA
Pf3D7_05_v3	1287996	A	-1605			0	0	0	0	0	0	1	1	1	1	NA	NA	NA	NA	NA	NA	NA	NA	NA	NA
Pf3D7_05_v3	1287998	T	-1603			0	0	0	0	0	0	1	1	1	1	NA	NA	NA	NA	NA	NA	NA	NA	NA	NA
Pf3D7_05_v3	1287999	A	-1602			0	0	0	0	0	0	1	1	1	1	NA	NA	NA	NA	NA	NA	NA	NA	NA	NA
Pf3D7_05_v3	1288000	A	-1601			0	0	0	0	0	0	1	1	1	1	NA	NA	NA	NA	NA	NA	NA	NA	NA	NA
Pf3D7_05_v3	1288003	T	-1598			0	0	0	0	0	0	1	1	1	1	NA	NA	NA	NA	NA	NA	NA	NA	NA	NA
Pf3D7_05_v3	1288007	T	-1594			0	0	0	0	0	0	1	1	1	1	NA	NA	NA	NA	NA	NA	NA	NA	NA	NA
Pf3D7_05_v3	1288014	T	-1587			0	0	0	0	0	0	1	1	1	1	NA	NA	NA	NA	NA	NA	NA	NA	NA	NA
Pf3D7_05_v3	1288022	A	-1579			0	0	0	0	0	0	1	1	1	1	NA	NA	NA	NA	NA	NA	NA	NA	NA	NA
Pf3D7_05_v3	1288023	T	-1578			0	0	0	0	0	0	1	1	1	1	NA	NA	NA	NA	NA	NA	NA	NA	NA	NA
Pf3D7_05_v3	1288026	T	-1575			0	0	0	0	0	0	1	1	1	1	NA	NA	NA	NA	NA	NA	NA	NA	NA	NA
Pf3D7_05_v3	1288029	T	-1572			0	0	0	0	0	0	1	1	1	1	NA	NA	NA	NA	NA	NA	NA	NA	NA	NA
Pf3D7_05_v3	1288034	T	-1567			0	0	0	0	0	0	1	1	1	1	NA	NA	NA	NA	NA	NA	NA	NA	NA	NA
Pf3D7_05_v3	1288038	T	-1563			0	0	0	0	0	0	1	1	1	1	NA	NA	NA	NA	NA	NA	NA	NA	NA	NA
Pf3D7_05_v3	1288039	T	-1562			0	0	0	0	0	0	1	1	1	1	NA	NA	NA	NA	NA	NA	NA	NA	NA	NA
Pf3D7_05_v3	1288040	T	-1561			0	0	0	0	0	0	1	1	1	1	NA	NA	NA	NA	NA	NA	NA	NA	NA	NA
Pf3D7_05_v3	1288043	T	-1558			0	0	0	0	0	0	1	1	1	1	NA	NA	NA	NA	NA	NA	NA	NA	NA	NA
Pf3D7_05_v3	1288048	T	-1553			0	0	0	0	0	0	1	1	1	1	NA	NA	NA	NA	NA	NA	NA	NA	NA	NA
Pf3D7_05_v3	1288050	T	-1551			0	0	0	0	0	0	1	1	1	1	NA	NA	NA	NA	NA	NA	NA	NA	NA	NA
Pf3D7_05_v3	1288053	T	-1548			0	0	0	0	0	0	1	1	1	1	NA	NA	NA	NA	NA	NA	NA	NA	NA	NA
Pf3D7_05_v3	1288055	A	-1546			0	0	0	0	0	0	1	1	1	1	NA	NA	NA	NA	NA	NA	NA	NA	NA	NA
Pf3D7_05_v3	1288056	A	-1545			0	0	0	0	0	0	1	1	1	1	NA	NA	NA	NA	NA	NA	NA	NA	NA	NA
Pf3D7_05_v3	1288058	A	-1543			0	0	0	0	0	0	1	1	1	1	NA	NA	NA	NA	NA	NA	NA	NA	NA	NA
Pf3D7_05_v3	1288063	T	-1538			0	0	0	0	0	0	1	1	1	1	NA	NA	NA	NA	NA	NA	NA	NA	NA	NA
Pf3D7_05_v3	1288067	A	-1534			0	0	0	0	0	0	1	1	1	1	NA	NA	NA	NA	NA	NA	NA	NA	NA	NA
Pf3D7_05_v3	1288068	A	-1533			0	0	0	0	0	0	1	1	1	1	NA	NA	NA	NA	NA	NA	NA	NA	NA	NA
Pf3D7_05_v3	1288069	T	-1532			0	0	0	0	0	0	1	1	1	1	NA	NA	NA	NA	NA	NA	NA	NA	NA	NA
Pf3D7_05_v3	1288073	A	-1528			0	0	0	0	0	0	1	1	1	1	NA	NA	NA	NA	NA	NA	NA	NA	NA	NA
Pf3D7_05_v3	1288074	T	-1527			0	0	0	0	0	0	1	1	1	1	NA	NA	NA	NA	NA	NA	NA	NA	NA	NA
Pf3D7_05_v3	1288075	T	-1526			0	0	0	0	0	0	1	1	1	1	NA	NA	NA	NA	NA	NA	NA	NA	NA	NA
Pf3D7_05_v3	1288077	A	-1524			0	0	0	0	0	0	1	1	1	1	NA	NA	NA	NA	NA	NA	NA	NA	NA	NA
Pf3D7_05_v3	1288078	A	-1523			0	0	0	0	0	0	1	1	1	1	NA	NA	NA	NA	NA	NA	NA	NA	NA	NA
Pf3D7_05_v3	1288079	A	-1522			0	0	0	0	0	0	1	1	1	1	NA	NA	NA	NA	NA	NA	NA	NA	NA	NA
Pf3D7_05_v3	1288080	T	-1521			0	0	0	0	0	0	1	1	1	1	NA	NA	NA	NA	NA	NA	NA	NA	NA	NA
Pf3D7_05_v3	1288082	A	-1519			0	0	0	0	0	0	1	1	1	1	NA	NA	NA	NA	NA	NA	NA	NA	NA	NA
Pf3D7_05_v3	1288083	T	-1518			0	0	0	0	0	0	1	1	1	1	NA	NA	NA	NA	NA	NA	NA	NA	NA	NA
Pf3D7_05_v3	1288086	T	-1515			0	0	0	0	0	0	1	1	1	1	NA	NA	NA	NA	NA	NA	NA	NA	NA	NA
Pf3D7_05_v3	1288087	A	-1514			0	0	0	0	0	0	1	1	1	1	NA	NA	NA	NA	NA	NA	NA	NA	NA	NA
Pf3D7_05_v3	1288088	A	-1513			0	0	0	0	0	0	1	1	1	1	NA	NA	NA	NA	NA	NA	NA	NA	NA	NA
Pf3D7_05_v3	1288089	T	-1512			0	0	0	0	0	0	1	1	1	1	NA	NA	NA	NA	NA	NA	NA	NA	NA	NA
Pf3D7_05_v3	1288091	T	-1510			0	0	0	1	0	0	1	1	1.20921	1	NA	NA	NA	NA	NA	NA	NA	NA	NA	NA
Pf3D7_05_v3	1288095	A	-1506			0	0	0	0	0	0	1	1	1	1	NA	NA	NA	NA	NA	NA	NA	NA	NA	NA
Pf3D7_05_v3	1288098	G	-1503			0	1	0	0	0	0	0.741745	0.741745	1	1	NA	NA	NA	NA	NA	NA	NA	NA	NA	NA
Pf3D7_05_v3	1288100	A	-1501			0	0	0	0	0	0	1	1	1	1	NA	NA	NA	NA	NA	NA	NA	NA	NA	NA
Pf3D7_05_v3	1288108	A	-1493			0	0	0	0	0	0	1	1	1	1	NA	NA	NA	NA	NA	NA	NA	NA	NA	NA
Pf3D7_05_v3	1288112	A	-1489			0	0	0	0	0	0	1	1	1	1	NA	NA	NA	NA	NA	NA	NA	NA	NA	NA
Pf3D7_05_v3	1288115	T	-1486			0	0	0	0	0	0	1	1	1	1	NA	NA	NA	NA	NA	NA	NA	NA	NA	NA
Pf3D7_05_v3	1288116	T	-1485			0	0	0	0	0	0	1	1	1	1	NA	NA	NA	NA	NA	NA	NA	NA	NA	NA
Pf3D7_05_v3	1288117	T	-1484			0	0	0	0	0	0	1	1	1	1	NA	NA	NA	NA	NA	NA	NA	NA	NA	NA
Pf3D7_05_v3	1288120	A	-1481			0	0	0	0	0	0	1	1	1	1	NA	NA	NA	NA	NA	NA	NA	NA	NA	NA
Pf3D7_05_v3	1288122	A	-1479			0	0	0	0	0	0	1	1	1	1	NA	NA	NA	NA	NA	NA	NA	NA	NA	NA
Pf3D7_05_v3	1288123	A	-1478			0	0	0	0	0	0	1	1	1	1	NA	NA	NA	NA	NA	NA	NA	NA	NA	NA
Pf3D7_05_v3	1288124	G	-1477			0	0	0	0	0	0	1	1	1	1	NA	NA	NA	NA	NA	NA	NA	NA	NA	NA
Pf3D7_05_v3	1288125	A	-1476			0	0	0	0	0	0	1	1	1	1	NA	NA	NA	NA	NA	NA	NA	NA	NA	NA
Pf3D7_05_v3	1288126	T	-1475			0	0	0	0	0	0	1	1	1	1	NA	NA	NA	NA	NA	NA	NA	NA	NA	NA
Pf3D7_05_v3	1288127	A	-1474			0	0	0	0	0	0	1	1	1	1	NA	NA	NA	NA	NA	NA	NA	NA	NA	NA
Pf3D7_05_v3	1288129	A	-1472			0	0	0	0	0	0	1	1	1	1	NA	NA	NA	NA	NA	NA	NA	NA	NA	NA
Pf3D7_05_v3	1288132	A	-1469			0	0	0	0	0	0	1	1	1	1	NA	NA	NA	NA	NA	NA	NA	NA	NA	NA
Pf3D7_05_v3	1288136	A	-1465			0	0	0	0	0	0	1	1	1	1	NA	NA	NA	NA	NA	NA	NA	NA	NA	NA
Pf3D7_05_v3	1288137	A	-1464			0	0	0	0	0	0	1	1	1	1	NA	NA	NA	NA	NA	NA	NA	NA	NA	NA
Pf3D7_05_v3	1288138	T	-1463			0	0	0	0	0	0	1	1	1	1	NA	NA	NA	NA	NA	NA	NA	NA	NA	NA
Pf3D7_05_v3	1288139	A	-1462			0	0	0	0	0	0	1	1	1	1	NA	NA	NA	NA	NA	NA	NA	NA	NA	NA
Pf3D7_05_v3	1288140	A	-1461			0	0	0	0	0	0	1	1	1	1	NA	NA	NA	NA	NA	NA	NA	NA	NA	NA
Pf3D7_05_v3	1288147	T	-1454			0	0	0	0	0	0	1	1	1	1	NA	NA	NA	NA	NA	NA	NA	NA	NA	NA
Pf3D7_05_v3	1288153	A	-1448			0	0	0	0	0	0	1	1	1	1	NA	NA	NA	NA	NA	NA	NA	NA	NA	NA
Pf3D7_05_v3	1288154	T	-1447			0	0	0	0	0	0	1	1	1	1	NA	NA	NA	NA	NA	NA	NA	NA	NA	NA
Pf3D7_05_v3	1288158	C	-1443			0	0	0	0	0	0	1	1	1	1	NA	NA	NA	NA	NA	NA	NA	NA	NA	NA
Pf3D7_05_v3	1288160	A	-1441			0	0	0	0	0	0	1	1	1	1	NA	NA	NA	NA	NA	NA	NA	NA	NA	NA
Pf3D7_05_v3	1288161	A	-1440			0	0	0	0	0	0	1	1	1	1	NA	NA	NA	NA	NA	NA	NA	NA	NA	NA
Pf3D7_05_v3	1288162	T	-1439			0	0	0	0	0	0	1	1	1	1	NA	NA	NA	NA	NA	NA	NA	NA	NA	NA
Pf3D7_05_v3	1288163	A	-1438			0	0	0	0	0	0	1	1	1	1	NA	NA	NA	NA	NA	NA	NA	NA	NA	NA
Pf3D7_05_v3	1288165	T	-1436			0	0	0	0	0	0	1	1	1	1	NA	NA	NA	NA	NA	NA	NA	NA	NA	NA
Pf3D7_05_v3	1288167	T	-1434			0	0	0	0	0	0	1	1	1	1	NA	NA	NA	NA	NA	NA	NA	NA	NA	NA
Pf3D7_05_v3	1288168	A	-1433			0	0	0	0	0	0	1	1	1	1	NA	NA	NA	NA	NA	NA	NA	NA	NA	NA
Pf3D7_05_v3	1288170	G	-1431			0	0	0	0	0	0	1	1	1	1	NA	NA	NA	NA	NA	NA	NA	NA	NA	NA
Pf3D7_05_v3	1288175	A	-1426			0	0	0	0	0	0	1	1	1	1	NA	NA	NA	NA	NA	NA	NA	NA	NA	NA
Pf3D7_05_v3	1288179	A	-1422			0	0	0	0	0	0	1	1	1	1	NA	NA	NA	NA	NA	NA	NA	NA	NA	NA
Pf3D7_05_v3	1288186	T	-1415			0	0	0	0	0	0	1	1	1	1	NA	NA	NA	NA	NA	NA	NA	NA	NA	NA
Pf3D7_05_v3	1288188	T	-1413			0	0	0	0	0	0	1	1	1	1	NA	NA	NA	NA	NA	NA	NA	NA	NA	NA
Pf3D7_05_v3	1288195	T	-1406			0	0	0	0	0	0	1	1	1	1	NA	NA	NA	NA	NA	NA	NA	NA	NA	NA
Pf3D7_05_v3	1288196	T	-1405			0	0	0	0	0	0	1	1	1	1	NA	NA	NA	NA	NA	NA	NA	NA	NA	NA
Pf3D7_05_v3	1288198	T	-1403			0	0	0	0	0	0	1	1	1	1	NA	NA	NA	NA	NA	NA	NA	NA	NA	NA
Pf3D7_05_v3	1288199	A	-1402			0	0	0	0	0	0	1	1	1	1	NA	NA	NA	NA	NA	NA	NA	NA	NA	NA
Pf3D7_05_v3	1288200	T	-1401			0	0	0	0	0	0	1	1	1	1	NA	NA	NA	NA	NA	NA	NA	NA	NA	NA
Pf3D7_05_v3	1288205	A	-1396			0	0	0	0	0	0	1	1	1	1	NA	NA	NA	NA	NA	NA	NA	NA	NA	NA
Pf3D7_05_v3	1288207	A	-1394			0	0	0	0	0	0	1	1	1	1	NA	NA	NA	NA	NA	NA	NA	NA	NA	NA
Pf3D7_05_v3	1288216	A	-1385			0	0	0	0	0	0	1	1	1	1	NA	NA	NA	NA	NA	NA	NA	NA	NA	NA
Pf3D7_05_v3	1288219	T	-1382			0	0	0	0	0	0	1	1	1	1	NA	NA	NA	NA	NA	NA	NA	NA	NA	NA
Pf3D7_05_v3	1288220	T	-1381			0	0	0	0	0	0	1	1	1	1	NA	NA	NA	NA	NA	NA	NA	NA	NA	NA
Pf3D7_05_v3	1288227	A	-1374			0	0	0	0	0	0	1	1	1	1	NA	NA	NA	NA	NA	NA	NA	NA	NA	NA
Pf3D7_05_v3	1288235	T	-1366			0	0	0	0	0	0	1	1	1	1	NA	NA	NA	NA	NA	NA	NA	NA	NA	NA
Pf3D7_05_v3	1288241	A	-1360			0	0	0	0	0	0	1	1	1	1	NA	NA	NA	NA	NA	NA	NA	NA	NA	NA
Pf3D7_05_v3	1288242	T	-1359			0	0	0	0	0	0	1	1	1	1	NA	NA	NA	NA	NA	NA	NA	NA	NA	NA
Pf3D7_05_v3	1288247	A	-1354			0	0	0	0	0	0	1	1	1	1	NA	NA	NA	NA	NA	NA	NA	NA	NA	NA
Pf3D7_05_v3	1288251	T	-1350			0	0	0	0	0	0	1	1	1	1	NA	NA	NA	NA	NA	NA	NA	NA	NA	NA
Pf3D7_05_v3	1288258	A	-1343			0	0	0	0	0	0	1	1	1	1	NA	NA	NA	NA	NA	NA	NA	NA	NA	NA
Pf3D7_05_v3	1288260	T	-1341			0	0	0	0	0	0	1	1	1	1	NA	NA	NA	NA	NA	NA	NA	NA	NA	NA
Pf3D7_05_v3	1288264	A	-1337			0	0	0	0	0	0	1	1	1	1	NA	NA	NA	NA	NA	NA	NA	NA	NA	NA
Pf3D7_05_v3	1288268	T	-1333			0	0	0	0	0	0	1	1	1	1	NA	NA	NA	NA	NA	NA	NA	NA	NA	NA
Pf3D7_05_v3	1288270	T	-1331			0	0	0	0	0	0	1	1	1	1	NA	NA	NA	NA	NA	NA	NA	NA	NA	NA
Pf3D7_05_v3	1288271	A	-1330			0	0	0	0	0	0	1	1	1	1	NA	NA	NA	NA	NA	NA	NA	NA	NA	NA
Pf3D7_05_v3	1288274	T	-1327			0	0	0	2	0	0	1	1	1.41843	1	NA	NA	NA	NA	NA	NA	NA	NA	NA	NA
Pf3D7_05_v3	1288277	T	-1324			0	0	0	0	0	0	1	1	1	1	NA	NA	NA	NA	NA	NA	NA	NA	NA	NA
Pf3D7_05_v3	1288280	A	-1321			0	0	0	0	0	0	1	1	1	1	NA	NA	NA	NA	NA	NA	NA	NA	NA	NA
Pf3D7_05_v3	1288286	A	-1315			0	0	0	0	0	0	1	1	1	1	NA	NA	NA	NA	NA	NA	NA	NA	NA	NA
Pf3D7_05_v3	1288295	C	-1306			0	0	0	0	0	0	1	1	1	1	NA	NA	NA	NA	NA	NA	NA	NA	NA	NA
Pf3D7_05_v3	1288296	A	-1305			0	0	0	0	0	0	1	1	1	1	NA	NA	NA	NA	NA	NA	NA	NA	NA	NA
Pf3D7_05_v3	1288298	T	-1303			0	0	0	0	0	0	1	1	1	1	NA	NA	NA	NA	NA	NA	NA	NA	NA	NA
Pf3D7_05_v3	1288300	T	-1301			0	0	0	0	0	0	1	1	1	1	NA	NA	NA	NA	NA	NA	NA	NA	NA	NA
Pf3D7_05_v3	1288301	A	-1300			0	0	0	0	0	0	1	1	1	1	NA	NA	NA	NA	NA	NA	NA	NA	NA	NA
Pf3D7_05_v3	1288303	A	-1298			0	0	0	0	0	0	1	1	1	1	NA	NA	NA	NA	NA	NA	NA	NA	NA	NA
Pf3D7_05_v3	1288305	T	-1296			0	0	0	0	0	0	1	1	1	1	NA	NA	NA	NA	NA	NA	NA	NA	NA	NA
Pf3D7_05_v3	1288306	T	-1295			0	0	0	0	0	0	1	1	1	1	NA	NA	NA	NA	NA	NA	NA	NA	NA	NA
Pf3D7_05_v3	1288309	A	-1292			0	0	0	0	0	0	1	1	1	1	NA	NA	NA	NA	NA	NA	NA	NA	NA	NA
Pf3D7_05_v3	1288310	T	-1291			0	0	0	0	0	0	1	1	1	1	NA	NA	NA	NA	NA	NA	NA	NA	NA	NA
Pf3D7_05_v3	1288311	C	-1290			0	0	0	0	0	0	1	1	1	1	NA	NA	NA	NA	NA	NA	NA	NA	NA	NA
Pf3D7_05_v3	1288312	T	-1289			0	0	0	0	0	0	1	1	1	1	NA	NA	NA	NA	NA	NA	NA	NA	NA	NA
Pf3D7_05_v3	1288319	T	-1282			0	0	0	0	0	0	1	1	1	1	NA	NA	NA	NA	NA	NA	NA	NA	NA	NA
Pf3D7_05_v3	1288322	T	-1279			0	0	0	0	0	0	1	1	1	1	NA	NA	NA	NA	NA	NA	NA	NA	NA	NA
Pf3D7_05_v3	1288324	G	-1277			0	0	0	0	0	0	1	1	1	1	NA	NA	NA	NA	NA	NA	NA	NA	NA	NA
Pf3D7_05_v3	1288326	C	-1275			0	0	0	0	0	0	1	1	1	1	NA	NA	NA	NA	NA	NA	NA	NA	NA	NA
Pf3D7_05_v3	1288330	T	-1271			0	0	0	0	0	0	1	1	1	1	NA	NA	NA	NA	NA	NA	NA	NA	NA	NA
Pf3D7_05_v3	1288331	A	-1270			0	0	0	0	0	0	1	1	1	1	NA	NA	NA	NA	NA	NA	NA	NA	NA	NA
Pf3D7_05_v3	1288332	T	-1269			0	0	0	0	0	0	1	1	1	1	NA	NA	NA	NA	NA	NA	NA	NA	NA	NA
Pf3D7_05_v3	1288333	A	-1268			0	0	0	0	0	0	1	1	1	1	NA	NA	NA	NA	NA	NA	NA	NA	NA	NA
Pf3D7_05_v3	1288339	A	-1262			0	0	0	0	0	0	1	1	1	1	NA	NA	NA	NA	NA	NA	NA	NA	NA	NA
Pf3D7_05_v3	1288341	A	-1260			0	0	0	0	0	0	1	1	1	1	NA	NA	NA	NA	NA	NA	NA	NA	NA	NA
Pf3D7_05_v3	1288342	T	-1259			0	0	0	0	0	0	1	1	1	1	NA	NA	NA	NA	NA	NA	NA	NA	NA	NA
Pf3D7_05_v3	1288345	A	-1256			0	0	0	0	0	0	1	1	1	1	NA	NA	NA	NA	NA	NA	NA	NA	NA	NA
Pf3D7_05_v3	1288346	G	-1255			0	0	0	0	0	0	1	1	1	1	NA	NA	NA	NA	NA	NA	NA	NA	NA	NA
Pf3D7_05_v3	1288348	A	-1253			0	0	0	0	0	0	1	1	1	1	NA	NA	NA	NA	NA	NA	NA	NA	NA	NA
Pf3D7_05_v3	1288349	T	-1252			0	0	0	0	0	0	1	1	1	1	NA	NA	NA	NA	NA	NA	NA	NA	NA	NA
Pf3D7_05_v3	1288350	G	-1251			0	0	0	0	0	0	1	1	1	1	NA	NA	NA	NA	NA	NA	NA	NA	NA	NA
Pf3D7_05_v3	1288351	T	-1250			0	0	0	0	0	0	1	1	1	1	NA	NA	NA	NA	NA	NA	NA	NA	NA	NA
Pf3D7_05_v3	1288352	T	-1249			0	0	0	0	0	0	1	1	1	1	NA	NA	NA	NA	NA	NA	NA	NA	NA	NA
Pf3D7_05_v3	1288354	A	-1247			0	0	0	0	0	0	1	1	1	1	NA	NA	NA	NA	NA	NA	NA	NA	NA	NA
Pf3D7_05_v3	1288356	A	-1245			0	0	0	0	0	0	1	1	1	1	NA	NA	NA	NA	NA	NA	NA	NA	NA	NA
Pf3D7_05_v3	1288359	T	-1242			0	0	0	0	0	0	1	1	1	1	NA	NA	NA	NA	NA	NA	NA	NA	NA	NA
Pf3D7_05_v3	1288360	A	-1241			0	0	0	0	0	0	1	1	1	1	NA	NA	NA	NA	NA	NA	NA	NA	NA	NA
Pf3D7_05_v3	1288361	T	-1240			0	0	0	0	0	0	1	1	1	1	NA	NA	NA	NA	NA	NA	NA	NA	NA	NA
Pf3D7_05_v3	1288366	A	-1235			0	0	0	0	0	0	1	1	1	1	NA	NA	NA	NA	NA	NA	NA	NA	NA	NA
Pf3D7_05_v3	1288367	A	-1234			0	0	0	0	0	0	1	1	1	1	NA	NA	NA	NA	NA	NA	NA	NA	NA	NA
Pf3D7_05_v3	1288369	A	-1232			0	0	0	0	0	0	1	1	1	1	NA	NA	NA	NA	NA	NA	NA	NA	NA	NA
Pf3D7_05_v3	1288371	T	-1230			0	0	0	0	0	0	1	1	1	1	NA	NA	NA	NA	NA	NA	NA	NA	NA	NA
Pf3D7_05_v3	1288372	T	-1229			0	0	0	0	0	0	1	1	1	1	NA	NA	NA	NA	NA	NA	NA	NA	NA	NA
Pf3D7_05_v3	1288374	C	-1227			0	0	0	0	0	0	1	1	1	1	NA	NA	NA	NA	NA	NA	NA	NA	NA	NA
Pf3D7_05_v3	1288375	A	-1226			0	0	0	0	0	0	1	1	1	1	NA	NA	NA	NA	NA	NA	NA	NA	NA	NA
Pf3D7_05_v3	1288377	A	-1224			0	0	0	0	0	0	1	1	1	1	NA	NA	NA	NA	NA	NA	NA	NA	NA	NA
Pf3D7_05_v3	1288378	A	-1223			0	0	0	0	0	0	1	1	1	1	NA	NA	NA	NA	NA	NA	NA	NA	NA	NA
Pf3D7_05_v3	1288382	A	-1219			0	0	0	0	0	0	1	1	1	1	NA	NA	NA	NA	NA	NA	NA	NA	NA	NA
Pf3D7_05_v3	1288383	A	-1218			0	0	1	0	0	0	1	1.2037	1	1	NA	NA	NA	NA	NA	NA	NA	NA	NA	NA
Pf3D7_05_v3	1288384	G	-1217			0	0	0	0	0	0	1	1	1	1	NA	NA	NA	NA	NA	NA	NA	NA	NA	NA
Pf3D7_05_v3	1288386	T	-1215			0	0	0	0	0	0	1	1	1	1	NA	NA	NA	NA	NA	NA	NA	NA	NA	NA
Pf3D7_05_v3	1288390	T	-1211			0	0	0	0	0	0	1	1	1	1	NA	NA	NA	NA	NA	NA	NA	NA	NA	NA
Pf3D7_05_v3	1288391	T	-1210			0	0	0	0	0	0	1	1	1	1	NA	NA	NA	NA	NA	NA	NA	NA	NA	NA
Pf3D7_05_v3	1288392	T	-1209			0	0	0	0	0	0	1	1	1	1	NA	NA	NA	NA	NA	NA	NA	NA	NA	NA
Pf3D7_05_v3	1288394	A	-1207			0	0	0	0	0	0	1	1	1	1	NA	NA	NA	NA	NA	NA	NA	NA	NA	NA
Pf3D7_05_v3	1288397	G	-1204			0	0	0	0	0	0	1	1	1	1	NA	NA	NA	NA	NA	NA	NA	NA	NA	NA
Pf3D7_05_v3	1288399	T	-1202			0	0	0	0	0	0	1	1	1	1	NA	NA	NA	NA	NA	NA	NA	NA	NA	NA
Pf3D7_05_v3	1288400	T	-1201			0	0	0	0	0	0	1	1	1	1	NA	NA	NA	NA	NA	NA	NA	NA	NA	NA
Pf3D7_05_v3	1288401	A	-1200			0	0	0	0	0	0	1	1	1	1	NA	NA	NA	NA	NA	NA	NA	NA	NA	NA
Pf3D7_05_v3	1288403	T	-1198			0	0	0	0	0	0	1	1	1	1	NA	NA	NA	NA	NA	NA	NA	NA	NA	NA
Pf3D7_05_v3	1288405	T	-1196			0	0	0	0	0	0	1	1	1	1	NA	NA	NA	NA	NA	NA	NA	NA	NA	NA
Pf3D7_05_v3	1288406	T	-1195			0	0	0	0	0	0	1	1	1	1	NA	NA	NA	NA	NA	NA	NA	NA	NA	NA
Pf3D7_05_v3	1288407	A	-1194			0	0	0	0	0	0	1	1	1	1	NA	NA	NA	NA	NA	NA	NA	NA	NA	NA
Pf3D7_05_v3	1288408	A	-1193			0	0	0	0	0	0	1	1	1	1	NA	NA	NA	NA	NA	NA	NA	NA	NA	NA
Pf3D7_05_v3	1288409	T	-1192			0	0	0	0	0	0	1	1	1	1	NA	NA	NA	NA	NA	NA	NA	NA	NA	NA
Pf3D7_05_v3	1288410	A	-1191			0	0	0	0	0	0	1	1	1	1	NA	NA	NA	NA	NA	NA	NA	NA	NA	NA
Pf3D7_05_v3	1288411	A	-1190			0	0	0	0	0	0	1	1	1	1	NA	NA	NA	NA	NA	NA	NA	NA	NA	NA
Pf3D7_05_v3	1288414	T	-1187			0	0	0	0	0	0	1	1	1	1	NA	NA	NA	NA	NA	NA	NA	NA	NA	NA
Pf3D7_05_v3	1288415	A	-1186			0	0	0	0	0	0	1	1	1	1	NA	NA	NA	NA	NA	NA	NA	NA	NA	NA
Pf3D7_05_v3	1288417	T	-1184			0	0	0	0	0	0	1	1	1	1	NA	NA	NA	NA	NA	NA	NA	NA	NA	NA
Pf3D7_05_v3	1288420	T	-1181			0	0	0	0	0	0	1	1	1	1	NA	NA	NA	NA	NA	NA	NA	NA	NA	NA
Pf3D7_05_v3	1288424	A	-1177			0	0	0	0	0	0	1	1	1	1	NA	NA	NA	NA	NA	NA	NA	NA	NA	NA
Pf3D7_05_v3	1288425	T	-1176			0	0	0	0	0	0	1	1	1	1	NA	NA	NA	NA	NA	NA	NA	NA	NA	NA
Pf3D7_05_v3	1288426	C	-1175			0	0	0	0	0	0	1	1	1	1	NA	NA	NA	NA	NA	NA	NA	NA	NA	NA
Pf3D7_05_v3	1288433	C	-1168			0	0	0	0	0	0	1	1	1	1	NA	NA	NA	NA	NA	NA	NA	NA	NA	NA
Pf3D7_05_v3	1288436	T	-1165			0	0	0	0	0	0	1	1	1	1	NA	NA	NA	NA	NA	NA	NA	NA	NA	NA
Pf3D7_05_v3	1288437	A	-1164			0	0	0	0	0	0	1	1	1	1	NA	NA	NA	NA	NA	NA	NA	NA	NA	NA
Pf3D7_05_v3	1288438	A	-1163			0	0	0	0	0	0	1	1	1	1	NA	NA	NA	NA	NA	NA	NA	NA	NA	NA
Pf3D7_05_v3	1288439	T	-1162			0	0	0	0	0	0	1	1	1	1	NA	NA	NA	NA	NA	NA	NA	NA	NA	NA
Pf3D7_05_v3	1288440	T	-1161			0	0	0	0	0	0	1	1	1	1	NA	NA	NA	NA	NA	NA	NA	NA	NA	NA
Pf3D7_05_v3	1288441	A	-1160			0	0	0	0	0	0	1	1	1	1	NA	NA	NA	NA	NA	NA	NA	NA	NA	NA
Pf3D7_05_v3	1288442	T	-1159			0	0	0	0	0	0	1	1	1	1	NA	NA	NA	NA	NA	NA	NA	NA	NA	NA
Pf3D7_05_v3	1288443	A	-1158			0	0	0	0	0	0	1	1	1	1	NA	NA	NA	NA	NA	NA	NA	NA	NA	NA
Pf3D7_05_v3	1288446	G	-1155			0	0	0	0	0	0	1	1	1	1	NA	NA	NA	NA	NA	NA	NA	NA	NA	NA
Pf3D7_05_v3	1288447	A	-1154			0	0	0	0	0	0	1	1	1	1	NA	NA	NA	NA	NA	NA	NA	NA	NA	NA
Pf3D7_05_v3	1288448	A	-1153			0	0	0	0	0	0	1	1	1	1	NA	NA	NA	NA	NA	NA	NA	NA	NA	NA
Pf3D7_05_v3	1288450	A	-1151			0	0	0	0	0	0	1	1	1	1	NA	NA	NA	NA	NA	NA	NA	NA	NA	NA
Pf3D7_05_v3	1288451	T	-1150			0	0	0	0	1	0	1	1	0.796748	0.796748	NA	NA	NA	NA	NA	NA	NA	NA	NA	NA
Pf3D7_05_v3	1288454	T	-1147			0	0	0	0	0	0	1	1	1	1	NA	NA	NA	NA	NA	NA	NA	NA	NA	NA
Pf3D7_05_v3	1288455	A	-1146			0	0	0	0	0	0	1	1	1	1	NA	NA	NA	NA	NA	NA	NA	NA	NA	NA
Pf3D7_05_v3	1288456	A	-1145			0	0	0	0	0	0	1	1	1	1	NA	NA	NA	NA	NA	NA	NA	NA	NA	NA
Pf3D7_05_v3	1288457	T	-1144			0	0	0	0	0	0	1	1	1	1	NA	NA	NA	NA	NA	NA	NA	NA	NA	NA
Pf3D7_05_v3	1288458	T	-1143			0	0	0	0	0	0	1	1	1	1	NA	NA	NA	NA	NA	NA	NA	NA	NA	NA
Pf3D7_05_v3	1288461	T	-1140			0	0	0	0	0	0	1	1	1	1	NA	NA	NA	NA	NA	NA	NA	NA	NA	NA
Pf3D7_05_v3	1288464	A	-1137			0	0	0	0	0	0	1	1	1	1	NA	NA	NA	NA	NA	NA	NA	NA	NA	NA
Pf3D7_05_v3	1288466	G	-1135			0	0	0	0	0	0	1	1	1	1	NA	NA	NA	NA	NA	NA	NA	NA	NA	NA
Pf3D7_05_v3	1288467	A	-1134			0	0	0	0	0	0	1	1	1	1	NA	NA	NA	NA	NA	NA	NA	NA	NA	NA
Pf3D7_05_v3	1288470	A	-1131			0	0	0	0	0	0	1	1	1	1	NA	NA	NA	NA	NA	NA	NA	NA	NA	NA
Pf3D7_05_v3	1288472	T	-1129			0	0	0	0	0	0	1	1	1	1	NA	NA	NA	NA	NA	NA	NA	NA	NA	NA
Pf3D7_05_v3	1288475	C	-1126			0	0	0	1	0	0	1	1	1.20921	1	NA	NA	NA	NA	NA	NA	NA	NA	NA	NA
Pf3D7_05_v3	1288477	C	-1124			0	0	0	0	0	0	1	1	1	1	NA	NA	NA	NA	NA	NA	NA	NA	NA	NA
Pf3D7_05_v3	1288485	A	-1116			0	0	0	0	0	0	1	1	1	1	NA	NA	NA	NA	NA	NA	NA	NA	NA	NA
Pf3D7_05_v3	1288487	A	-1114			0	0	0	0	0	0	1	1	1	1	NA	NA	NA	NA	NA	NA	NA	NA	NA	NA
Pf3D7_05_v3	1288488	A	-1113			0	0	0	0	0	0	1	1	1	1	NA	NA	NA	NA	NA	NA	NA	NA	NA	NA
Pf3D7_05_v3	1288490	A	-1111			0	0	0	0	0	0	1	1	1	1	NA	NA	NA	NA	NA	NA	NA	NA	NA	NA
Pf3D7_05_v3	1288498	T	-1103			0	0	0	0	0	0	1	1	1	1	NA	NA	NA	NA	NA	NA	NA	NA	NA	NA
Pf3D7_05_v3	1288500	A	-1101			0	0	0	0	0	0	1	1	1	1	NA	NA	NA	NA	NA	NA	NA	NA	NA	NA
Pf3D7_05_v3	1288501	A	-1100			0	0	0	0	0	0	1	1	1	1	NA	NA	NA	NA	NA	NA	NA	NA	NA	NA
Pf3D7_05_v3	1288503	A	-1098			0	0	0	0	0	0	1	1	1	1	NA	NA	NA	NA	NA	NA	NA	NA	NA	NA
Pf3D7_05_v3	1288509	A	-1092			0	0	0	0	0	0	1	1	1	1	NA	NA	NA	NA	NA	NA	NA	NA	NA	NA
Pf3D7_05_v3	1288510	A	-1091			0	0	0	0	0	0	1	1	1	1	NA	NA	NA	NA	NA	NA	NA	NA	NA	NA
Pf3D7_05_v3	1288512	A	-1089			0	0	0	0	0	0	1	1	1	1	NA	NA	NA	NA	NA	NA	NA	NA	NA	NA
Pf3D7_05_v3	1288517	A	-1084			0	0	0	0	0	0	1	1	1	1	NA	NA	NA	NA	NA	NA	NA	NA	NA	NA
Pf3D7_05_v3	1288519	T	-1082			0	0	0	0	0	0	1	1	1	1	NA	NA	NA	NA	NA	NA	NA	NA	NA	NA
Pf3D7_05_v3	1288521	A	-1080			0	0	0	0	0	0	1	1	1	1	NA	NA	NA	NA	NA	NA	NA	NA	NA	NA
Pf3D7_05_v3	1288522	A	-1079			0	0	0	0	0	0	1	1	1	1	NA	NA	NA	NA	NA	NA	NA	NA	NA	NA
Pf3D7_05_v3	1288523	A	-1078			0	0	0	0	0	0	1	1	1	1	NA	NA	NA	NA	NA	NA	NA	NA	NA	NA
Pf3D7_05_v3	1288524	T	-1077			0	0	0	0	0	0	1	1	1	1	NA	NA	NA	NA	NA	NA	NA	NA	NA	NA
Pf3D7_05_v3	1288525	A	-1076			0	0	0	0	0	0	1	1	1	1	NA	NA	NA	NA	NA	NA	NA	NA	NA	NA
Pf3D7_05_v3	1288526	A	-1075			0	0	0	0	0	0	1	1	1	1	NA	NA	NA	NA	NA	NA	NA	NA	NA	NA
Pf3D7_05_v3	1288527	A	-1074			0	0	0	0	0	0	1	1	1	1	NA	NA	NA	NA	NA	NA	NA	NA	NA	NA
Pf3D7_05_v3	1288528	T	-1073			0	0	0	0	0	0	1	1	1	1	NA	NA	NA	NA	NA	NA	NA	NA	NA	NA
Pf3D7_05_v3	1288530	A	-1071			0	0	0	0	0	0	1	1	1	1	NA	NA	NA	NA	NA	NA	NA	NA	NA	NA
Pf3D7_05_v3	1288532	C	-1069			0	0	0	0	0	0	1	1	1	1	NA	NA	NA	NA	NA	NA	NA	NA	NA	NA
Pf3D7_05_v3	1288534	T	-1067			0	0	0	0	0	0	1	1	1	1	NA	NA	NA	NA	NA	NA	NA	NA	NA	NA
Pf3D7_05_v3	1288536	A	-1065			0	0	0	0	0	0	1	1	1	1	NA	NA	NA	NA	NA	NA	NA	NA	NA	NA
Pf3D7_05_v3	1288537	T	-1064			0	0	0	0	0	0	1	1	1	1	NA	NA	NA	NA	NA	NA	NA	NA	NA	NA
Pf3D7_05_v3	1288538	T	-1063			0	0	0	0	0	0	1	1	1	1	NA	NA	NA	NA	NA	NA	NA	NA	NA	NA
Pf3D7_05_v3	1288539	G	-1062			0	0	0	0	0	0	1	1	1	1	NA	NA	NA	NA	NA	NA	NA	NA	NA	NA
Pf3D7_05_v3	1288540	A	-1061			0	0	0	0	0	0	1	1	1	1	NA	NA	NA	NA	NA	NA	NA	NA	NA	NA
Pf3D7_05_v3	1288542	T	-1059			0	0	0	0	0	0	1	1	1	1	NA	NA	NA	NA	NA	NA	NA	NA	NA	NA
Pf3D7_05_v3	1288546	G	-1055			0	0	0	0	0	0	1	1	1	1	NA	NA	NA	NA	NA	NA	NA	NA	NA	NA
Pf3D7_05_v3	1288548	A	-1053			0	0	0	0	0	0	1	1	1	1	NA	NA	NA	NA	NA	NA	NA	NA	NA	NA
Pf3D7_05_v3	1288549	G	-1052			0	0	0	0	0	0	1	1	1	1	NA	NA	NA	NA	NA	NA	NA	NA	NA	NA
Pf3D7_05_v3	1288554	C	-1047			0	0	0	0	0	0	1	1	1	1	NA	NA	NA	NA	NA	NA	NA	NA	NA	NA
Pf3D7_05_v3	1288555	C	-1046			0	0	0	0	0	0	1	1	1	1	NA	NA	NA	NA	NA	NA	NA	NA	NA	NA
Pf3D7_05_v3	1288556	T	-1045			0	0	0	0	0	0	1	1	1	1	NA	NA	NA	NA	NA	NA	NA	NA	NA	NA
Pf3D7_05_v3	1288557	C	-1044			0	0	0	0	0	0	1	1	1	1	NA	NA	NA	NA	NA	NA	NA	NA	NA	NA
Pf3D7_05_v3	1288558	G	-1043			0	0	0	0	0	0	1	1	1	1	NA	NA	NA	NA	NA	NA	NA	NA	NA	NA
Pf3D7_05_v3	1288559	A	-1042			0	0	0	0	0	0	1	1	1	1	rna_PF3D7_0531500-1	rna_PF3D7_0531500-1	Pf3D7_05_v3	1288559	1289308	PF3D7_0531500-1	unspecified+product	PF3D7_0531500-1	750	PF3D7_0531500
Pf3D7_05_v3	1288560	A	-1041			0	0	0	0	0	0	1	1	1	1	rna_PF3D7_0531500-1	rna_PF3D7_0531500-1	Pf3D7_05_v3	1288559	1289308	PF3D7_0531500-1	unspecified+product	PF3D7_0531500-1	750	PF3D7_0531500
Pf3D7_05_v3	1288561	A	-1040			0	0	0	0	0	0	1	1	1	1	rna_PF3D7_0531500-1	rna_PF3D7_0531500-1	Pf3D7_05_v3	1288559	1289308	PF3D7_0531500-1	unspecified+product	PF3D7_0531500-1	750	PF3D7_0531500
Pf3D7_05_v3	1288562	A	-1039			0	0	0	0	0	0	1	1	1	1	rna_PF3D7_0531500-1	rna_PF3D7_0531500-1	Pf3D7_05_v3	1288559	1289308	PF3D7_0531500-1	unspecified+product	PF3D7_0531500-1	750	PF3D7_0531500
Pf3D7_05_v3	1288563	A	-1038			0	0	0	0	0	0	1	1	1	1	rna_PF3D7_0531500-1	rna_PF3D7_0531500-1	Pf3D7_05_v3	1288559	1289308	PF3D7_0531500-1	unspecified+product	PF3D7_0531500-1	750	PF3D7_0531500
Pf3D7_05_v3	1288564	A	-1037			0	0	0	0	0	0	1	1	1	1	rna_PF3D7_0531500-1	rna_PF3D7_0531500-1	Pf3D7_05_v3	1288559	1289308	PF3D7_0531500-1	unspecified+product	PF3D7_0531500-1	750	PF3D7_0531500
Pf3D7_05_v3	1288565	A	-1036			0	0	0	0	1	0	1	1	0.796748	0.796748	rna_PF3D7_0531500-1	rna_PF3D7_0531500-1	Pf3D7_05_v3	1288559	1289308	PF3D7_0531500-1	unspecified+product	PF3D7_0531500-1	750	PF3D7_0531500
Pf3D7_05_v3	1288566	A	-1035			0	0	0	0	0	1	1	1	1	1.24463	rna_PF3D7_0531500-1	rna_PF3D7_0531500-1	Pf3D7_05_v3	1288559	1289308	PF3D7_0531500-1	unspecified+product	PF3D7_0531500-1	750	PF3D7_0531500
Pf3D7_05_v3	1288567	A	-1034			0	0	0	0	0	0	1	1	1	1	rna_PF3D7_0531500-1	rna_PF3D7_0531500-1	Pf3D7_05_v3	1288559	1289308	PF3D7_0531500-1	unspecified+product	PF3D7_0531500-1	750	PF3D7_0531500
Pf3D7_05_v3	1288568	A	-1033			0	0	0	0	1	0	1	1	0.796748	0.796748	rna_PF3D7_0531500-1	rna_PF3D7_0531500-1	Pf3D7_05_v3	1288559	1289308	PF3D7_0531500-1	unspecified+product	PF3D7_0531500-1	750	PF3D7_0531500
Pf3D7_05_v3	1288569	A	-1032			0	0	0	0	0	0	1	1	1	1	rna_PF3D7_0531500-1	rna_PF3D7_0531500-1	Pf3D7_05_v3	1288559	1289308	PF3D7_0531500-1	unspecified+product	PF3D7_0531500-1	750	PF3D7_0531500
Pf3D7_05_v3	1288570	A	-1031			0	0	0	0	0	0	1	1	1	1	rna_PF3D7_0531500-1	rna_PF3D7_0531500-1	Pf3D7_05_v3	1288559	1289308	PF3D7_0531500-1	unspecified+product	PF3D7_0531500-1	750	PF3D7_0531500
Pf3D7_05_v3	1288571	A	-1030			0	0	0	0	0	0	1	1	1	1	rna_PF3D7_0531500-1	rna_PF3D7_0531500-1	Pf3D7_05_v3	1288559	1289308	PF3D7_0531500-1	unspecified+product	PF3D7_0531500-1	750	PF3D7_0531500
Pf3D7_05_v3	1288572	A	-1029			0	0	0	0	0	0	1	1	1	1	rna_PF3D7_0531500-1	rna_PF3D7_0531500-1	Pf3D7_05_v3	1288559	1289308	PF3D7_0531500-1	unspecified+product	PF3D7_0531500-1	750	PF3D7_0531500
Pf3D7_05_v3	1288573	A	-1028			0	0	0	2	0	0	1	1	1.41843	1	rna_PF3D7_0531500-1	rna_PF3D7_0531500-1	Pf3D7_05_v3	1288559	1289308	PF3D7_0531500-1	unspecified+product	PF3D7_0531500-1	750	PF3D7_0531500
Pf3D7_05_v3	1288574	A	-1027			0	0	0	1	0	0	1	1	1.20921	1	rna_PF3D7_0531500-1	rna_PF3D7_0531500-1	Pf3D7_05_v3	1288559	1289308	PF3D7_0531500-1	unspecified+product	PF3D7_0531500-1	750	PF3D7_0531500
Pf3D7_05_v3	1288575	A	-1026			0	0	0	3	1	0	1	1	1.29682	0.796748	rna_PF3D7_0531500-1	rna_PF3D7_0531500-1	Pf3D7_05_v3	1288559	1289308	PF3D7_0531500-1	unspecified+product	PF3D7_0531500-1	750	PF3D7_0531500
Pf3D7_05_v3	1288576	T	-1025			0	0	0	2	0	0	1	1	1.41843	1	rna_PF3D7_0531500-1	rna_PF3D7_0531500-1	Pf3D7_05_v3	1288559	1289308	PF3D7_0531500-1	unspecified+product	PF3D7_0531500-1	750	PF3D7_0531500
Pf3D7_05_v3	1288577	T	-1024			0	2	0	0	0	0	0.589503	0.589503	1	1	rna_PF3D7_0531500-1	rna_PF3D7_0531500-1	Pf3D7_05_v3	1288559	1289308	PF3D7_0531500-1	unspecified+product	PF3D7_0531500-1	750	PF3D7_0531500
Pf3D7_05_v3	1288578	A	-1023			1	0	0	0	0	0	1.2	1	1	1	rna_PF3D7_0531500-1	rna_PF3D7_0531500-1	Pf3D7_05_v3	1288559	1289308	PF3D7_0531500-1	unspecified+product	PF3D7_0531500-1	750	PF3D7_0531500
Pf3D7_05_v3	1288579	G	-1022			0	0	0	0	0	0	1	1	1	1	rna_PF3D7_0531500-1	rna_PF3D7_0531500-1	Pf3D7_05_v3	1288559	1289308	PF3D7_0531500-1	unspecified+product	PF3D7_0531500-1	750	PF3D7_0531500
Pf3D7_05_v3	1288580	T	-1021			0	0	0	0	0	0	1	1	1	1	rna_PF3D7_0531500-1	rna_PF3D7_0531500-1	Pf3D7_05_v3	1288559	1289308	PF3D7_0531500-1	unspecified+product	PF3D7_0531500-1	750	PF3D7_0531500
Pf3D7_05_v3	1288581	T	-1020			0	0	0	0	0	0	1	1	1	1	rna_PF3D7_0531500-1	rna_PF3D7_0531500-1	Pf3D7_05_v3	1288559	1289308	PF3D7_0531500-1	unspecified+product	PF3D7_0531500-1	750	PF3D7_0531500
Pf3D7_05_v3	1288582	T	-1019			0	0	0	0	0	0	1	1	1	1	rna_PF3D7_0531500-1	rna_PF3D7_0531500-1	Pf3D7_05_v3	1288559	1289308	PF3D7_0531500-1	unspecified+product	PF3D7_0531500-1	750	PF3D7_0531500
Pf3D7_05_v3	1288583	T	-1018			0	0	0	0	0	0	1	1	1	1	rna_PF3D7_0531500-1	rna_PF3D7_0531500-1	Pf3D7_05_v3	1288559	1289308	PF3D7_0531500-1	unspecified+product	PF3D7_0531500-1	750	PF3D7_0531500
Pf3D7_05_v3	1288584	A	-1017			0	0	2	0	0	0	1	1.40739	1	1	rna_PF3D7_0531500-1	rna_PF3D7_0531500-1	Pf3D7_05_v3	1288559	1289308	PF3D7_0531500-1	unspecified+product	PF3D7_0531500-1	750	PF3D7_0531500
Pf3D7_05_v3	1288585	A	-1016			0	0	0	0	0	0	1	1	1	1	rna_PF3D7_0531500-1	rna_PF3D7_0531500-1	Pf3D7_05_v3	1288559	1289308	PF3D7_0531500-1	unspecified+product	PF3D7_0531500-1	750	PF3D7_0531500
Pf3D7_05_v3	1288586	T	-1015			0	0	0	0	0	0	1	1	1	1	rna_PF3D7_0531500-1	rna_PF3D7_0531500-1	Pf3D7_05_v3	1288559	1289308	PF3D7_0531500-1	unspecified+product	PF3D7_0531500-1	750	PF3D7_0531500
Pf3D7_05_v3	1288587	A	-1014			0	0	0	1	0	0	1	1	1.20921	1	rna_PF3D7_0531500-1	rna_PF3D7_0531500-1	Pf3D7_05_v3	1288559	1289308	PF3D7_0531500-1	unspecified+product	PF3D7_0531500-1	750	PF3D7_0531500
Pf3D7_05_v3	1288588	T	-1013			0	0	0	0	0	0	1	1	1	1	rna_PF3D7_0531500-1	rna_PF3D7_0531500-1	Pf3D7_05_v3	1288559	1289308	PF3D7_0531500-1	unspecified+product	PF3D7_0531500-1	750	PF3D7_0531500
Pf3D7_05_v3	1288589	G	-1012			0	0	0	2	0	0	1	1	1.41843	1	rna_PF3D7_0531500-1	rna_PF3D7_0531500-1	Pf3D7_05_v3	1288559	1289308	PF3D7_0531500-1	unspecified+product	PF3D7_0531500-1	750	PF3D7_0531500
Pf3D7_05_v3	1288590	A	-1011			1	0	0	2	0	0	1.2	1	1.41843	1	rna_PF3D7_0531500-1	rna_PF3D7_0531500-1	Pf3D7_05_v3	1288559	1289308	PF3D7_0531500-1	unspecified+product	PF3D7_0531500-1	750	PF3D7_0531500
Pf3D7_05_v3	1288591	A	-1010			0	0	0	0	0	0	1	1	1	1	rna_PF3D7_0531500-1	rna_PF3D7_0531500-1	Pf3D7_05_v3	1288559	1289308	PF3D7_0531500-1	unspecified+product	PF3D7_0531500-1	750	PF3D7_0531500
Pf3D7_05_v3	1288592	T	-1009			0	1	0	0	0	0	0.741745	0.741745	1	1	rna_PF3D7_0531500-1	rna_PF3D7_0531500-1	Pf3D7_05_v3	1288559	1289308	PF3D7_0531500-1	unspecified+product	PF3D7_0531500-1	750	PF3D7_0531500
Pf3D7_05_v3	1288593	T	-1008			0	0	0	0	0	0	1	1	1	1	rna_PF3D7_0531500-1	rna_PF3D7_0531500-1	Pf3D7_05_v3	1288559	1289308	PF3D7_0531500-1	unspecified+product	PF3D7_0531500-1	750	PF3D7_0531500
Pf3D7_05_v3	1288594	T	-1007			0	0	0	0	0	0	1	1	1	1	rna_PF3D7_0531500-1	rna_PF3D7_0531500-1	Pf3D7_05_v3	1288559	1289308	PF3D7_0531500-1	unspecified+product	PF3D7_0531500-1	750	PF3D7_0531500
Pf3D7_05_v3	1288595	A	-1006			0	0	0	0	0	0	1	1	1	1	rna_PF3D7_0531500-1	rna_PF3D7_0531500-1	Pf3D7_05_v3	1288559	1289308	PF3D7_0531500-1	unspecified+product	PF3D7_0531500-1	750	PF3D7_0531500
Pf3D7_05_v3	1288596	A	-1005			0	0	0	0	0	0	1	1	1	1	rna_PF3D7_0531500-1	rna_PF3D7_0531500-1	Pf3D7_05_v3	1288559	1289308	PF3D7_0531500-1	unspecified+product	PF3D7_0531500-1	750	PF3D7_0531500
Pf3D7_05_v3	1288597	A	-1004			0	0	0	1	0	0	1	1	1.20921	1	rna_PF3D7_0531500-1	rna_PF3D7_0531500-1	Pf3D7_05_v3	1288559	1289308	PF3D7_0531500-1	unspecified+product	PF3D7_0531500-1	750	PF3D7_0531500
Pf3D7_05_v3	1288598	A	-1003			0	0	0	0	0	0	1	1	1	1	rna_PF3D7_0531500-1	rna_PF3D7_0531500-1	Pf3D7_05_v3	1288559	1289308	PF3D7_0531500-1	unspecified+product	PF3D7_0531500-1	750	PF3D7_0531500
Pf3D7_05_v3	1288599	A	-1002			0	0	0	0	0	0	1	1	1	1	rna_PF3D7_0531500-1	rna_PF3D7_0531500-1	Pf3D7_05_v3	1288559	1289308	PF3D7_0531500-1	unspecified+product	PF3D7_0531500-1	750	PF3D7_0531500
Pf3D7_05_v3	1288600	A	-1001			0	0	0	0	0	0	1	1	1	1	rna_PF3D7_0531500-1	rna_PF3D7_0531500-1	Pf3D7_05_v3	1288559	1289308	PF3D7_0531500-1	unspecified+product	PF3D7_0531500-1	750	PF3D7_0531500
Pf3D7_05_v3	1288601	G	-1000			0	0	0	1	0	0	1	1	1.20921	1	rna_PF3D7_0531500-1	rna_PF3D7_0531500-1	Pf3D7_05_v3	1288559	1289308	PF3D7_0531500-1	unspecified+product	PF3D7_0531500-1	750	PF3D7_0531500
Pf3D7_05_v3	1288602	A	-999			1	0	0	1	0	0	1.2	1	1.20921	1	rna_PF3D7_0531500-1	rna_PF3D7_0531500-1	Pf3D7_05_v3	1288559	1289308	PF3D7_0531500-1	unspecified+product	PF3D7_0531500-1	750	PF3D7_0531500
Pf3D7_05_v3	1288603	A	-998			1	0	0	0	0	0	1.2	1	1	1	rna_PF3D7_0531500-1	rna_PF3D7_0531500-1	Pf3D7_05_v3	1288559	1289308	PF3D7_0531500-1	unspecified+product	PF3D7_0531500-1	750	PF3D7_0531500
Pf3D7_05_v3	1288604	A	-997			1	0	0	0	0	1	1.2	1	1	1.24463	rna_PF3D7_0531500-1	rna_PF3D7_0531500-1	Pf3D7_05_v3	1288559	1289308	PF3D7_0531500-1	unspecified+product	PF3D7_0531500-1	750	PF3D7_0531500
Pf3D7_05_v3	1288605	T	-996			1	0	0	0	0	0	1.2	1	1	1	rna_PF3D7_0531500-1	rna_PF3D7_0531500-1	Pf3D7_05_v3	1288559	1289308	PF3D7_0531500-1	unspecified+product	PF3D7_0531500-1	750	PF3D7_0531500
Pf3D7_05_v3	1288606	T	-995			1	0	0	0	0	1	1.2	1	1	1.24463	rna_PF3D7_0531500-1	rna_PF3D7_0531500-1	Pf3D7_05_v3	1288559	1289308	PF3D7_0531500-1	unspecified+product	PF3D7_0531500-1	750	PF3D7_0531500
Pf3D7_05_v3	1288607	A	-994			0	0	0	0	0	0	1	1	1	1	rna_PF3D7_0531500-1	rna_PF3D7_0531500-1	Pf3D7_05_v3	1288559	1289308	PF3D7_0531500-1	unspecified+product	PF3D7_0531500-1	750	PF3D7_0531500
Pf3D7_05_v3	1288608	A	-993			0	0	0	0	0	0	1	1	1	1	rna_PF3D7_0531500-1	rna_PF3D7_0531500-1	Pf3D7_05_v3	1288559	1289308	PF3D7_0531500-1	unspecified+product	PF3D7_0531500-1	750	PF3D7_0531500
Pf3D7_05_v3	1288609	G	-992			0	0	0	0	0	0	1	1	1	1	rna_PF3D7_0531500-1	rna_PF3D7_0531500-1	Pf3D7_05_v3	1288559	1289308	PF3D7_0531500-1	unspecified+product	PF3D7_0531500-1	750	PF3D7_0531500
Pf3D7_05_v3	1288610	G	-991			0	0	0	0	0	0	1	1	1	1	rna_PF3D7_0531500-1	rna_PF3D7_0531500-1	Pf3D7_05_v3	1288559	1289308	PF3D7_0531500-1	unspecified+product	PF3D7_0531500-1	750	PF3D7_0531500
Pf3D7_05_v3	1288611	T	-990			0	0	0	0	0	0	1	1	1	1	rna_PF3D7_0531500-1	rna_PF3D7_0531500-1	Pf3D7_05_v3	1288559	1289308	PF3D7_0531500-1	unspecified+product	PF3D7_0531500-1	750	PF3D7_0531500
Pf3D7_05_v3	1288612	T	-989			0	0	0	0	0	0	1	1	1	1	rna_PF3D7_0531500-1	rna_PF3D7_0531500-1	Pf3D7_05_v3	1288559	1289308	PF3D7_0531500-1	unspecified+product	PF3D7_0531500-1	750	PF3D7_0531500
Pf3D7_05_v3	1288613	A	-988			0	0	0	0	0	0	1	1	1	1	rna_PF3D7_0531500-1	rna_PF3D7_0531500-1	Pf3D7_05_v3	1288559	1289308	PF3D7_0531500-1	unspecified+product	PF3D7_0531500-1	750	PF3D7_0531500
Pf3D7_05_v3	1288614	G	-987			0	0	0	0	0	0	1	1	1	1	rna_PF3D7_0531500-1	rna_PF3D7_0531500-1	Pf3D7_05_v3	1288559	1289308	PF3D7_0531500-1	unspecified+product	PF3D7_0531500-1	750	PF3D7_0531500
Pf3D7_05_v3	1288615	A	-986			0	0	0	0	0	0	1	1	1	1	rna_PF3D7_0531500-1	rna_PF3D7_0531500-1	Pf3D7_05_v3	1288559	1289308	PF3D7_0531500-1	unspecified+product	PF3D7_0531500-1	750	PF3D7_0531500
Pf3D7_05_v3	1288616	A	-985			0	0	0	0	0	0	1	1	1	1	rna_PF3D7_0531500-1	rna_PF3D7_0531500-1	Pf3D7_05_v3	1288559	1289308	PF3D7_0531500-1	unspecified+product	PF3D7_0531500-1	750	PF3D7_0531500
Pf3D7_05_v3	1288617	A	-984			0	0	0	0	0	0	1	1	1	1	rna_PF3D7_0531500-1	rna_PF3D7_0531500-1	Pf3D7_05_v3	1288559	1289308	PF3D7_0531500-1	unspecified+product	PF3D7_0531500-1	750	PF3D7_0531500
Pf3D7_05_v3	1288618	A	-983			0	0	0	0	0	0	1	1	1	1	rna_PF3D7_0531500-1	rna_PF3D7_0531500-1	Pf3D7_05_v3	1288559	1289308	PF3D7_0531500-1	unspecified+product	PF3D7_0531500-1	750	PF3D7_0531500
Pf3D7_05_v3	1288619	A	-982			0	0	0	0	0	0	1	1	1	1	rna_PF3D7_0531500-1	rna_PF3D7_0531500-1	Pf3D7_05_v3	1288559	1289308	PF3D7_0531500-1	unspecified+product	PF3D7_0531500-1	750	PF3D7_0531500
Pf3D7_05_v3	1288620	A	-981			0	0	0	0	0	0	1	1	1	1	rna_PF3D7_0531500-1	rna_PF3D7_0531500-1	Pf3D7_05_v3	1288559	1289308	PF3D7_0531500-1	unspecified+product	PF3D7_0531500-1	750	PF3D7_0531500
Pf3D7_05_v3	1288621	A	-980			1	0	0	0	0	0	1.2	1	1	1	rna_PF3D7_0531500-1	rna_PF3D7_0531500-1	Pf3D7_05_v3	1288559	1289308	PF3D7_0531500-1	unspecified+product	PF3D7_0531500-1	750	PF3D7_0531500
Pf3D7_05_v3	1288622	A	-979			0	0	0	0	0	0	1	1	1	1	rna_PF3D7_0531500-1	rna_PF3D7_0531500-1	Pf3D7_05_v3	1288559	1289308	PF3D7_0531500-1	unspecified+product	PF3D7_0531500-1	750	PF3D7_0531500
Pf3D7_05_v3	1288623	A	-978			0	0	0	0	0	0	1	1	1	1	rna_PF3D7_0531500-1	rna_PF3D7_0531500-1	Pf3D7_05_v3	1288559	1289308	PF3D7_0531500-1	unspecified+product	PF3D7_0531500-1	750	PF3D7_0531500
Pf3D7_05_v3	1288624	T	-977			0	0	0	0	0	0	1	1	1	1	rna_PF3D7_0531500-1	rna_PF3D7_0531500-1	Pf3D7_05_v3	1288559	1289308	PF3D7_0531500-1	unspecified+product	PF3D7_0531500-1	750	PF3D7_0531500
Pf3D7_05_v3	1288625	T	-976			1	0	0	0	0	0	1.2	1	1	1	rna_PF3D7_0531500-1	rna_PF3D7_0531500-1	Pf3D7_05_v3	1288559	1289308	PF3D7_0531500-1	unspecified+product	PF3D7_0531500-1	750	PF3D7_0531500
Pf3D7_05_v3	1288626	C	-975			0	0	0	0	0	0	1	1	1	1	rna_PF3D7_0531500-1	rna_PF3D7_0531500-1	Pf3D7_05_v3	1288559	1289308	PF3D7_0531500-1	unspecified+product	PF3D7_0531500-1	750	PF3D7_0531500
Pf3D7_05_v3	1288627	T	-974			0	0	0	0	0	0	1	1	1	1	rna_PF3D7_0531500-1	rna_PF3D7_0531500-1	Pf3D7_05_v3	1288559	1289308	PF3D7_0531500-1	unspecified+product	PF3D7_0531500-1	750	PF3D7_0531500
Pf3D7_05_v3	1288628	A	-973			0	0	0	0	0	0	1	1	1	1	rna_PF3D7_0531500-1	rna_PF3D7_0531500-1	Pf3D7_05_v3	1288559	1289308	PF3D7_0531500-1	unspecified+product	PF3D7_0531500-1	750	PF3D7_0531500
Pf3D7_05_v3	1288629	A	-972			0	0	0	0	0	0	1	1	1	1	rna_PF3D7_0531500-1	rna_PF3D7_0531500-1	Pf3D7_05_v3	1288559	1289308	PF3D7_0531500-1	unspecified+product	PF3D7_0531500-1	750	PF3D7_0531500
Pf3D7_05_v3	1288630	T	-971			1	0	0	2	0	0	1.2	1	1.41843	1	rna_PF3D7_0531500-1	rna_PF3D7_0531500-1	Pf3D7_05_v3	1288559	1289308	PF3D7_0531500-1	unspecified+product	PF3D7_0531500-1	750	PF3D7_0531500
Pf3D7_05_v3	1288631	A	-970			0	0	0	0	0	0	1	1	1	1	rna_PF3D7_0531500-1	rna_PF3D7_0531500-1	Pf3D7_05_v3	1288559	1289308	PF3D7_0531500-1	unspecified+product	PF3D7_0531500-1	750	PF3D7_0531500
Pf3D7_05_v3	1288632	T	-969			0	0	0	0	0	0	1	1	1	1	rna_PF3D7_0531500-1	rna_PF3D7_0531500-1	Pf3D7_05_v3	1288559	1289308	PF3D7_0531500-1	unspecified+product	PF3D7_0531500-1	750	PF3D7_0531500
Pf3D7_05_v3	1288633	T	-968			0	0	0	1	0	0	1	1	1.20921	1	rna_PF3D7_0531500-1	rna_PF3D7_0531500-1	Pf3D7_05_v3	1288559	1289308	PF3D7_0531500-1	unspecified+product	PF3D7_0531500-1	750	PF3D7_0531500
Pf3D7_05_v3	1288634	A	-967			0	0	0	0	0	0	1	1	1	1	rna_PF3D7_0531500-1	rna_PF3D7_0531500-1	Pf3D7_05_v3	1288559	1289308	PF3D7_0531500-1	unspecified+product	PF3D7_0531500-1	750	PF3D7_0531500
Pf3D7_05_v3	1288635	A	-966			0	0	0	0	0	0	1	1	1	1	rna_PF3D7_0531500-1	rna_PF3D7_0531500-1	Pf3D7_05_v3	1288559	1289308	PF3D7_0531500-1	unspecified+product	PF3D7_0531500-1	750	PF3D7_0531500
Pf3D7_05_v3	1288636	A	-965			0	0	0	0	0	0	1	1	1	1	rna_PF3D7_0531500-1	rna_PF3D7_0531500-1	Pf3D7_05_v3	1288559	1289308	PF3D7_0531500-1	unspecified+product	PF3D7_0531500-1	750	PF3D7_0531500
Pf3D7_05_v3	1288637	A	-964			1	0	0	0	1	0	1.2	1	0.796748	0.796748	rna_PF3D7_0531500-1	rna_PF3D7_0531500-1	Pf3D7_05_v3	1288559	1289308	PF3D7_0531500-1	unspecified+product	PF3D7_0531500-1	750	PF3D7_0531500
Pf3D7_05_v3	1288638	T	-963			0	0	0	0	0	0	1	1	1	1	rna_PF3D7_0531500-1	rna_PF3D7_0531500-1	Pf3D7_05_v3	1288559	1289308	PF3D7_0531500-1	unspecified+product	PF3D7_0531500-1	750	PF3D7_0531500
Pf3D7_05_v3	1288639	A	-962			1	0	0	1	0	0	1.2	1	1.20921	1	rna_PF3D7_0531500-1	rna_PF3D7_0531500-1	Pf3D7_05_v3	1288559	1289308	PF3D7_0531500-1	unspecified+product	PF3D7_0531500-1	750	PF3D7_0531500
Pf3D7_05_v3	1288640	A	-961			0	0	0	0	0	0	1	1	1	1	rna_PF3D7_0531500-1	rna_PF3D7_0531500-1	Pf3D7_05_v3	1288559	1289308	PF3D7_0531500-1	unspecified+product	PF3D7_0531500-1	750	PF3D7_0531500
Pf3D7_05_v3	1288641	A	-960			0	0	0	0	0	0	1	1	1	1	rna_PF3D7_0531500-1	rna_PF3D7_0531500-1	Pf3D7_05_v3	1288559	1289308	PF3D7_0531500-1	unspecified+product	PF3D7_0531500-1	750	PF3D7_0531500
Pf3D7_05_v3	1288642	T	-959			0	0	1	0	0	0	1	1.2037	1	1	rna_PF3D7_0531500-1	rna_PF3D7_0531500-1	Pf3D7_05_v3	1288559	1289308	PF3D7_0531500-1	unspecified+product	PF3D7_0531500-1	750	PF3D7_0531500
Pf3D7_05_v3	1288643	T	-958			0	0	0	0	0	0	1	1	1	1	rna_PF3D7_0531500-1	rna_PF3D7_0531500-1	Pf3D7_05_v3	1288559	1289308	PF3D7_0531500-1	unspecified+product	PF3D7_0531500-1	750	PF3D7_0531500
Pf3D7_05_v3	1288644	T	-957			0	0	0	0	0	0	1	1	1	1	rna_PF3D7_0531500-1	rna_PF3D7_0531500-1	Pf3D7_05_v3	1288559	1289308	PF3D7_0531500-1	unspecified+product	PF3D7_0531500-1	750	PF3D7_0531500
Pf3D7_05_v3	1288645	A	-956			0	0	0	0	0	0	1	1	1	1	rna_PF3D7_0531500-1	rna_PF3D7_0531500-1	Pf3D7_05_v3	1288559	1289308	PF3D7_0531500-1	unspecified+product	PF3D7_0531500-1	750	PF3D7_0531500
Pf3D7_05_v3	1288646	T	-955			0	0	0	0	0	0	1	1	1	1	rna_PF3D7_0531500-1	rna_PF3D7_0531500-1	Pf3D7_05_v3	1288559	1289308	PF3D7_0531500-1	unspecified+product	PF3D7_0531500-1	750	PF3D7_0531500
Pf3D7_05_v3	1288647	T	-954			1	0	0	0	0	0	1.2	1	1	1	rna_PF3D7_0531500-1	rna_PF3D7_0531500-1	Pf3D7_05_v3	1288559	1289308	PF3D7_0531500-1	unspecified+product	PF3D7_0531500-1	750	PF3D7_0531500
Pf3D7_05_v3	1288648	T	-953			0	0	0	0	0	0	1	1	1	1	rna_PF3D7_0531500-1	rna_PF3D7_0531500-1	Pf3D7_05_v3	1288559	1289308	PF3D7_0531500-1	unspecified+product	PF3D7_0531500-1	750	PF3D7_0531500
Pf3D7_05_v3	1288649	A	-952			0	0	0	0	0	0	1	1	1	1	rna_PF3D7_0531500-1	rna_PF3D7_0531500-1	Pf3D7_05_v3	1288559	1289308	PF3D7_0531500-1	unspecified+product	PF3D7_0531500-1	750	PF3D7_0531500
Pf3D7_05_v3	1288650	T	-951			0	0	0	0	0	0	1	1	1	1	rna_PF3D7_0531500-1	rna_PF3D7_0531500-1	Pf3D7_05_v3	1288559	1289308	PF3D7_0531500-1	unspecified+product	PF3D7_0531500-1	750	PF3D7_0531500
Pf3D7_05_v3	1288651	A	-950			0	0	0	1	0	0	1	1	1.20921	1	rna_PF3D7_0531500-1	rna_PF3D7_0531500-1	Pf3D7_05_v3	1288559	1289308	PF3D7_0531500-1	unspecified+product	PF3D7_0531500-1	750	PF3D7_0531500
Pf3D7_05_v3	1288652	C	-949			0	0	0	0	0	0	1	1	1	1	rna_PF3D7_0531500-1	rna_PF3D7_0531500-1	Pf3D7_05_v3	1288559	1289308	PF3D7_0531500-1	unspecified+product	PF3D7_0531500-1	750	PF3D7_0531500
Pf3D7_05_v3	1288653	A	-948			2	0	0	0	0	0	1.4	1	1	1	rna_PF3D7_0531500-1	rna_PF3D7_0531500-1	Pf3D7_05_v3	1288559	1289308	PF3D7_0531500-1	unspecified+product	PF3D7_0531500-1	750	PF3D7_0531500
Pf3D7_05_v3	1288654	T	-947			0	0	0	0	0	0	1	1	1	1	rna_PF3D7_0531500-1	rna_PF3D7_0531500-1	Pf3D7_05_v3	1288559	1289308	PF3D7_0531500-1	unspecified+product	PF3D7_0531500-1	750	PF3D7_0531500
Pf3D7_05_v3	1288655	T	-946			0	0	0	0	0	0	1	1	1	1	rna_PF3D7_0531500-1	rna_PF3D7_0531500-1	Pf3D7_05_v3	1288559	1289308	PF3D7_0531500-1	unspecified+product	PF3D7_0531500-1	750	PF3D7_0531500
Pf3D7_05_v3	1288656	T	-945			0	0	0	0	0	0	1	1	1	1	rna_PF3D7_0531500-1	rna_PF3D7_0531500-1	Pf3D7_05_v3	1288559	1289308	PF3D7_0531500-1	unspecified+product	PF3D7_0531500-1	750	PF3D7_0531500
Pf3D7_05_v3	1288657	T	-944			0	0	0	0	0	0	1	1	1	1	rna_PF3D7_0531500-1	rna_PF3D7_0531500-1	Pf3D7_05_v3	1288559	1289308	PF3D7_0531500-1	unspecified+product	PF3D7_0531500-1	750	PF3D7_0531500
Pf3D7_05_v3	1288658	T	-943			0	0	0	1	0	0	1	1	1.20921	1	rna_PF3D7_0531500-1	rna_PF3D7_0531500-1	Pf3D7_05_v3	1288559	1289308	PF3D7_0531500-1	unspecified+product	PF3D7_0531500-1	750	PF3D7_0531500
Pf3D7_05_v3	1288659	T	-942			0	0	0	0	0	0	1	1	1	1	rna_PF3D7_0531500-1	rna_PF3D7_0531500-1	Pf3D7_05_v3	1288559	1289308	PF3D7_0531500-1	unspecified+product	PF3D7_0531500-1	750	PF3D7_0531500
Pf3D7_05_v3	1288660	T	-941			0	0	0	0	0	0	1	1	1	1	rna_PF3D7_0531500-1	rna_PF3D7_0531500-1	Pf3D7_05_v3	1288559	1289308	PF3D7_0531500-1	unspecified+product	PF3D7_0531500-1	750	PF3D7_0531500
Pf3D7_05_v3	1288661	T	-940			0	0	0	0	0	0	1	1	1	1	rna_PF3D7_0531500-1	rna_PF3D7_0531500-1	Pf3D7_05_v3	1288559	1289308	PF3D7_0531500-1	unspecified+product	PF3D7_0531500-1	750	PF3D7_0531500
Pf3D7_05_v3	1288662	T	-939			0	0	1	1	0	0	1	1.2037	1.20921	1	rna_PF3D7_0531500-1	rna_PF3D7_0531500-1	Pf3D7_05_v3	1288559	1289308	PF3D7_0531500-1	unspecified+product	PF3D7_0531500-1	750	PF3D7_0531500
Pf3D7_05_v3	1288663	A	-938			0	0	0	1	0	0	1	1	1.20921	1	rna_PF3D7_0531500-1	rna_PF3D7_0531500-1	Pf3D7_05_v3	1288559	1289308	PF3D7_0531500-1	unspecified+product	PF3D7_0531500-1	750	PF3D7_0531500
Pf3D7_05_v3	1288664	T	-937			0	0	0	0	0	0	1	1	1	1	rna_PF3D7_0531500-1	rna_PF3D7_0531500-1	Pf3D7_05_v3	1288559	1289308	PF3D7_0531500-1	unspecified+product	PF3D7_0531500-1	750	PF3D7_0531500
Pf3D7_05_v3	1288665	T	-936			0	0	0	2	0	0	1	1	1.41843	1	rna_PF3D7_0531500-1	rna_PF3D7_0531500-1	Pf3D7_05_v3	1288559	1289308	PF3D7_0531500-1	unspecified+product	PF3D7_0531500-1	750	PF3D7_0531500
Pf3D7_05_v3	1288666	A	-935			0	0	0	0	0	0	1	1	1	1	rna_PF3D7_0531500-1	rna_PF3D7_0531500-1	Pf3D7_05_v3	1288559	1289308	PF3D7_0531500-1	unspecified+product	PF3D7_0531500-1	750	PF3D7_0531500
Pf3D7_05_v3	1288667	T	-934			0	0	0	0	0	0	1	1	1	1	rna_PF3D7_0531500-1	rna_PF3D7_0531500-1	Pf3D7_05_v3	1288559	1289308	PF3D7_0531500-1	unspecified+product	PF3D7_0531500-1	750	PF3D7_0531500
Pf3D7_05_v3	1288668	G	-933			0	0	0	0	0	0	1	1	1	1	rna_PF3D7_0531500-1	rna_PF3D7_0531500-1	Pf3D7_05_v3	1288559	1289308	PF3D7_0531500-1	unspecified+product	PF3D7_0531500-1	750	PF3D7_0531500
Pf3D7_05_v3	1288669	A	-932			0	0	0	0	0	0	1	1	1	1	rna_PF3D7_0531500-1	rna_PF3D7_0531500-1	Pf3D7_05_v3	1288559	1289308	PF3D7_0531500-1	unspecified+product	PF3D7_0531500-1	750	PF3D7_0531500
Pf3D7_05_v3	1288670	A	-931			0	0	0	1	0	0	1	1	1.20921	1	rna_PF3D7_0531500-1	rna_PF3D7_0531500-1	Pf3D7_05_v3	1288559	1289308	PF3D7_0531500-1	unspecified+product	PF3D7_0531500-1	750	PF3D7_0531500
Pf3D7_05_v3	1288671	T	-930			0	0	0	0	0	0	1	1	1	1	rna_PF3D7_0531500-1	rna_PF3D7_0531500-1	Pf3D7_05_v3	1288559	1289308	PF3D7_0531500-1	unspecified+product	PF3D7_0531500-1	750	PF3D7_0531500
Pf3D7_05_v3	1288672	T	-929			0	0	0	0	0	0	1	1	1	1	rna_PF3D7_0531500-1	rna_PF3D7_0531500-1	Pf3D7_05_v3	1288559	1289308	PF3D7_0531500-1	unspecified+product	PF3D7_0531500-1	750	PF3D7_0531500
Pf3D7_05_v3	1288673	A	-928			0	0	0	0	0	1	1	1	1	1.24463	rna_PF3D7_0531500-1	rna_PF3D7_0531500-1	Pf3D7_05_v3	1288559	1289308	PF3D7_0531500-1	unspecified+product	PF3D7_0531500-1	750	PF3D7_0531500
Pf3D7_05_v3	1288674	T	-927			0	0	0	0	0	0	1	1	1	1	rna_PF3D7_0531500-1	rna_PF3D7_0531500-1	Pf3D7_05_v3	1288559	1289308	PF3D7_0531500-1	unspecified+product	PF3D7_0531500-1	750	PF3D7_0531500
Pf3D7_05_v3	1288675	T	-926			0	0	0	0	0	0	1	1	1	1	rna_PF3D7_0531500-1	rna_PF3D7_0531500-1	Pf3D7_05_v3	1288559	1289308	PF3D7_0531500-1	unspecified+product	PF3D7_0531500-1	750	PF3D7_0531500
Pf3D7_05_v3	1288676	T	-925			1	0	0	0	0	0	1.2	1	1	1	rna_PF3D7_0531500-1	rna_PF3D7_0531500-1	Pf3D7_05_v3	1288559	1289308	PF3D7_0531500-1	unspecified+product	PF3D7_0531500-1	750	PF3D7_0531500
Pf3D7_05_v3	1288677	A	-924			0	0	0	0	0	0	1	1	1	1	rna_PF3D7_0531500-1	rna_PF3D7_0531500-1	Pf3D7_05_v3	1288559	1289308	PF3D7_0531500-1	unspecified+product	PF3D7_0531500-1	750	PF3D7_0531500
Pf3D7_05_v3	1288678	T	-923			1	0	0	0	0	0	1.2	1	1	1	rna_PF3D7_0531500-1	rna_PF3D7_0531500-1	Pf3D7_05_v3	1288559	1289308	PF3D7_0531500-1	unspecified+product	PF3D7_0531500-1	750	PF3D7_0531500
Pf3D7_05_v3	1288679	T	-922			0	0	0	0	0	0	1	1	1	1	rna_PF3D7_0531500-1	rna_PF3D7_0531500-1	Pf3D7_05_v3	1288559	1289308	PF3D7_0531500-1	unspecified+product	PF3D7_0531500-1	750	PF3D7_0531500
Pf3D7_05_v3	1288680	T	-921			0	0	0	0	0	0	1	1	1	1	rna_PF3D7_0531500-1	rna_PF3D7_0531500-1	Pf3D7_05_v3	1288559	1289308	PF3D7_0531500-1	unspecified+product	PF3D7_0531500-1	750	PF3D7_0531500
Pf3D7_05_v3	1288681	T	-920			0	0	0	1	0	0	1	1	1.20921	1	rna_PF3D7_0531500-1	rna_PF3D7_0531500-1	Pf3D7_05_v3	1288559	1289308	PF3D7_0531500-1	unspecified+product	PF3D7_0531500-1	750	PF3D7_0531500
Pf3D7_05_v3	1288682	A	-919			0	0	0	0	0	0	1	1	1	1	rna_PF3D7_0531500-1	rna_PF3D7_0531500-1	Pf3D7_05_v3	1288559	1289308	PF3D7_0531500-1	unspecified+product	PF3D7_0531500-1	750	PF3D7_0531500
Pf3D7_05_v3	1288683	A	-918			0	0	0	0	0	0	1	1	1	1	rna_PF3D7_0531500-1	rna_PF3D7_0531500-1	Pf3D7_05_v3	1288559	1289308	PF3D7_0531500-1	unspecified+product	PF3D7_0531500-1	750	PF3D7_0531500
Pf3D7_05_v3	1288684	A	-917			0	0	0	0	0	0	1	1	1	1	rna_PF3D7_0531500-1	rna_PF3D7_0531500-1	Pf3D7_05_v3	1288559	1289308	PF3D7_0531500-1	unspecified+product	PF3D7_0531500-1	750	PF3D7_0531500
Pf3D7_05_v3	1288685	A	-916			0	0	0	0	0	0	1	1	1	1	rna_PF3D7_0531500-1	rna_PF3D7_0531500-1	Pf3D7_05_v3	1288559	1289308	PF3D7_0531500-1	unspecified+product	PF3D7_0531500-1	750	PF3D7_0531500
Pf3D7_05_v3	1288686	A	-915			0	0	1	0	0	0	1	1.2037	1	1	rna_PF3D7_0531500-1	rna_PF3D7_0531500-1	Pf3D7_05_v3	1288559	1289308	PF3D7_0531500-1	unspecified+product	PF3D7_0531500-1	750	PF3D7_0531500
Pf3D7_05_v3	1288687	T	-914			0	0	0	0	0	0	1	1	1	1	rna_PF3D7_0531500-1	rna_PF3D7_0531500-1	Pf3D7_05_v3	1288559	1289308	PF3D7_0531500-1	unspecified+product	PF3D7_0531500-1	750	PF3D7_0531500
Pf3D7_05_v3	1288688	A	-913			0	2	0	0	0	0	0.589503	0.589503	1	1	rna_PF3D7_0531500-1	rna_PF3D7_0531500-1	Pf3D7_05_v3	1288559	1289308	PF3D7_0531500-1	unspecified+product	PF3D7_0531500-1	750	PF3D7_0531500
Pf3D7_05_v3	1288689	A	-912			1	0	0	0	0	0	1.2	1	1	1	rna_PF3D7_0531500-1	rna_PF3D7_0531500-1	Pf3D7_05_v3	1288559	1289308	PF3D7_0531500-1	unspecified+product	PF3D7_0531500-1	750	PF3D7_0531500
Pf3D7_05_v3	1288690	G	-911			0	0	0	0	0	0	1	1	1	1	rna_PF3D7_0531500-1	rna_PF3D7_0531500-1	Pf3D7_05_v3	1288559	1289308	PF3D7_0531500-1	unspecified+product	PF3D7_0531500-1	750	PF3D7_0531500
Pf3D7_05_v3	1288691	T	-910			0	0	0	0	0	0	1	1	1	1	rna_PF3D7_0531500-1	rna_PF3D7_0531500-1	Pf3D7_05_v3	1288559	1289308	PF3D7_0531500-1	unspecified+product	PF3D7_0531500-1	750	PF3D7_0531500
Pf3D7_05_v3	1288692	T	-909			0	0	0	0	0	0	1	1	1	1	rna_PF3D7_0531500-1	rna_PF3D7_0531500-1	Pf3D7_05_v3	1288559	1289308	PF3D7_0531500-1	unspecified+product	PF3D7_0531500-1	750	PF3D7_0531500
Pf3D7_05_v3	1288693	T	-908			0	0	0	0	0	0	1	1	1	1	rna_PF3D7_0531500-1	rna_PF3D7_0531500-1	Pf3D7_05_v3	1288559	1289308	PF3D7_0531500-1	unspecified+product	PF3D7_0531500-1	750	PF3D7_0531500
Pf3D7_05_v3	1288694	G	-907			0	0	0	0	0	0	1	1	1	1	rna_PF3D7_0531500-1	rna_PF3D7_0531500-1	Pf3D7_05_v3	1288559	1289308	PF3D7_0531500-1	unspecified+product	PF3D7_0531500-1	750	PF3D7_0531500
Pf3D7_05_v3	1288695	A	-906			2	0	0	0	0	0	1.4	1	1	1	rna_PF3D7_0531500-1	rna_PF3D7_0531500-1	Pf3D7_05_v3	1288559	1289308	PF3D7_0531500-1	unspecified+product	PF3D7_0531500-1	750	PF3D7_0531500
Pf3D7_05_v3	1288697	T	-904			0	0	0	0	0	0	1	1	1	1	rna_PF3D7_0531500-1	rna_PF3D7_0531500-1	Pf3D7_05_v3	1288559	1289308	PF3D7_0531500-1	unspecified+product	PF3D7_0531500-1	750	PF3D7_0531500
Pf3D7_05_v3	1288698	A	-903			0	0	0	0	0	0	1	1	1	1	rna_PF3D7_0531500-1	rna_PF3D7_0531500-1	Pf3D7_05_v3	1288559	1289308	PF3D7_0531500-1	unspecified+product	PF3D7_0531500-1	750	PF3D7_0531500
Pf3D7_05_v3	1288699	A	-902			0	0	0	0	0	0	1	1	1	1	rna_PF3D7_0531500-1	rna_PF3D7_0531500-1	Pf3D7_05_v3	1288559	1289308	PF3D7_0531500-1	unspecified+product	PF3D7_0531500-1	750	PF3D7_0531500
Pf3D7_05_v3	1288700	G	-901			0	0	0	0	0	0	1	1	1	1	rna_PF3D7_0531500-1	rna_PF3D7_0531500-1	Pf3D7_05_v3	1288559	1289308	PF3D7_0531500-1	unspecified+product	PF3D7_0531500-1	750	PF3D7_0531500
Pf3D7_05_v3	1288701	T	-900			0	0	0	0	0	0	1	1	1	1	rna_PF3D7_0531500-1	rna_PF3D7_0531500-1	Pf3D7_05_v3	1288559	1289308	PF3D7_0531500-1	unspecified+product	PF3D7_0531500-1	750	PF3D7_0531500
Pf3D7_05_v3	1288702	T	-899			0	0	0	0	0	0	1	1	1	1	rna_PF3D7_0531500-1	rna_PF3D7_0531500-1	Pf3D7_05_v3	1288559	1289308	PF3D7_0531500-1	unspecified+product	PF3D7_0531500-1	750	PF3D7_0531500
Pf3D7_05_v3	1288703	T	-898			0	0	0	0	0	0	1	1	1	1	rna_PF3D7_0531500-1	rna_PF3D7_0531500-1	Pf3D7_05_v3	1288559	1289308	PF3D7_0531500-1	unspecified+product	PF3D7_0531500-1	750	PF3D7_0531500
Pf3D7_05_v3	1288704	T	-897			0	0	0	0	0	0	1	1	1	1	rna_PF3D7_0531500-1	rna_PF3D7_0531500-1	Pf3D7_05_v3	1288559	1289308	PF3D7_0531500-1	unspecified+product	PF3D7_0531500-1	750	PF3D7_0531500
Pf3D7_05_v3	1288705	T	-896			0	0	0	0	0	0	1	1	1	1	rna_PF3D7_0531500-1	rna_PF3D7_0531500-1	Pf3D7_05_v3	1288559	1289308	PF3D7_0531500-1	unspecified+product	PF3D7_0531500-1	750	PF3D7_0531500
Pf3D7_05_v3	1288706	T	-895			0	0	0	0	0	0	1	1	1	1	rna_PF3D7_0531500-1	rna_PF3D7_0531500-1	Pf3D7_05_v3	1288559	1289308	PF3D7_0531500-1	unspecified+product	PF3D7_0531500-1	750	PF3D7_0531500
Pf3D7_05_v3	1288707	A	-894			0	0	0	0	0	0	1	1	1	1	rna_PF3D7_0531500-1	rna_PF3D7_0531500-1	Pf3D7_05_v3	1288559	1289308	PF3D7_0531500-1	unspecified+product	PF3D7_0531500-1	750	PF3D7_0531500
Pf3D7_05_v3	1288708	T	-893			1	0	0	0	0	0	1.2	1	1	1	rna_PF3D7_0531500-1	rna_PF3D7_0531500-1	Pf3D7_05_v3	1288559	1289308	PF3D7_0531500-1	unspecified+product	PF3D7_0531500-1	750	PF3D7_0531500
Pf3D7_05_v3	1288709	T	-892			0	0	0	0	0	0	1	1	1	1	rna_PF3D7_0531500-1	rna_PF3D7_0531500-1	Pf3D7_05_v3	1288559	1289308	PF3D7_0531500-1	unspecified+product	PF3D7_0531500-1	750	PF3D7_0531500
Pf3D7_05_v3	1288710	T	-891			0	0	0	0	0	0	1	1	1	1	rna_PF3D7_0531500-1	rna_PF3D7_0531500-1	Pf3D7_05_v3	1288559	1289308	PF3D7_0531500-1	unspecified+product	PF3D7_0531500-1	750	PF3D7_0531500
Pf3D7_05_v3	1288711	A	-890			0	0	0	0	0	0	1	1	1	1	rna_PF3D7_0531500-1	rna_PF3D7_0531500-1	Pf3D7_05_v3	1288559	1289308	PF3D7_0531500-1	unspecified+product	PF3D7_0531500-1	750	PF3D7_0531500
Pf3D7_05_v3	1288712	T	-889			0	0	0	0	0	0	1	1	1	1	rna_PF3D7_0531500-1	rna_PF3D7_0531500-1	Pf3D7_05_v3	1288559	1289308	PF3D7_0531500-1	unspecified+product	PF3D7_0531500-1	750	PF3D7_0531500
Pf3D7_05_v3	1288713	A	-888			0	0	0	0	0	0	1	1	1	1	rna_PF3D7_0531500-1	rna_PF3D7_0531500-1	Pf3D7_05_v3	1288559	1289308	PF3D7_0531500-1	unspecified+product	PF3D7_0531500-1	750	PF3D7_0531500
Pf3D7_05_v3	1288714	T	-887			0	0	0	0	0	0	1	1	1	1	rna_PF3D7_0531500-1	rna_PF3D7_0531500-1	Pf3D7_05_v3	1288559	1289308	PF3D7_0531500-1	unspecified+product	PF3D7_0531500-1	750	PF3D7_0531500
Pf3D7_05_v3	1288715	A	-886			0	0	0	0	0	0	1	1	1	1	rna_PF3D7_0531500-1	rna_PF3D7_0531500-1	Pf3D7_05_v3	1288559	1289308	PF3D7_0531500-1	unspecified+product	PF3D7_0531500-1	750	PF3D7_0531500
Pf3D7_05_v3	1288716	T	-885			0	0	0	0	0	0	1	1	1	1	rna_PF3D7_0531500-1	rna_PF3D7_0531500-1	Pf3D7_05_v3	1288559	1289308	PF3D7_0531500-1	unspecified+product	PF3D7_0531500-1	750	PF3D7_0531500
Pf3D7_05_v3	1288717	A	-884			0	1	0	0	0	0	0.741745	0.741745	1	1	rna_PF3D7_0531500-1	rna_PF3D7_0531500-1	Pf3D7_05_v3	1288559	1289308	PF3D7_0531500-1	unspecified+product	PF3D7_0531500-1	750	PF3D7_0531500
Pf3D7_05_v3	1288718	T	-883			0	0	0	0	0	0	1	1	1	1	rna_PF3D7_0531500-1	rna_PF3D7_0531500-1	Pf3D7_05_v3	1288559	1289308	PF3D7_0531500-1	unspecified+product	PF3D7_0531500-1	750	PF3D7_0531500
Pf3D7_05_v3	1288719	A	-882			0	0	0	0	0	0	1	1	1	1	rna_PF3D7_0531500-1	rna_PF3D7_0531500-1	Pf3D7_05_v3	1288559	1289308	PF3D7_0531500-1	unspecified+product	PF3D7_0531500-1	750	PF3D7_0531500
Pf3D7_05_v3	1288720	T	-881			0	0	0	0	0	0	1	1	1	1	rna_PF3D7_0531500-1	rna_PF3D7_0531500-1	Pf3D7_05_v3	1288559	1289308	PF3D7_0531500-1	unspecified+product	PF3D7_0531500-1	750	PF3D7_0531500
Pf3D7_05_v3	1288721	T	-880			0	0	0	0	0	0	1	1	1	1	rna_PF3D7_0531500-1	rna_PF3D7_0531500-1	Pf3D7_05_v3	1288559	1289308	PF3D7_0531500-1	unspecified+product	PF3D7_0531500-1	750	PF3D7_0531500
Pf3D7_05_v3	1288722	A	-879			0	0	1	0	0	0	1	1.2037	1	1	rna_PF3D7_0531500-1	rna_PF3D7_0531500-1	Pf3D7_05_v3	1288559	1289308	PF3D7_0531500-1	unspecified+product	PF3D7_0531500-1	750	PF3D7_0531500
Pf3D7_05_v3	1288723	A	-878			0	0	1	0	0	0	1	1.2037	1	1	rna_PF3D7_0531500-1	rna_PF3D7_0531500-1	Pf3D7_05_v3	1288559	1289308	PF3D7_0531500-1	unspecified+product	PF3D7_0531500-1	750	PF3D7_0531500
Pf3D7_05_v3	1288724	G	-877			4	0	0	0	0	0	1.8	1	1	1	rna_PF3D7_0531500-1	rna_PF3D7_0531500-1	Pf3D7_05_v3	1288559	1289308	PF3D7_0531500-1	unspecified+product	PF3D7_0531500-1	750	PF3D7_0531500
Pf3D7_05_v3	1288725	A	-876			0	1	0	0	0	0	0.741745	0.741745	1	1	rna_PF3D7_0531500-1	rna_PF3D7_0531500-1	Pf3D7_05_v3	1288559	1289308	PF3D7_0531500-1	unspecified+product	PF3D7_0531500-1	750	PF3D7_0531500
Pf3D7_05_v3	1288726	A	-875			0	0	0	0	0	0	1	1	1	1	rna_PF3D7_0531500-1	rna_PF3D7_0531500-1	Pf3D7_05_v3	1288559	1289308	PF3D7_0531500-1	unspecified+product	PF3D7_0531500-1	750	PF3D7_0531500
Pf3D7_05_v3	1288727	T	-874			0	0	0	0	0	0	1	1	1	1	rna_PF3D7_0531500-1	rna_PF3D7_0531500-1	Pf3D7_05_v3	1288559	1289308	PF3D7_0531500-1	unspecified+product	PF3D7_0531500-1	750	PF3D7_0531500
Pf3D7_05_v3	1288728	A	-873			0	0	0	0	0	0	1	1	1	1	rna_PF3D7_0531500-1	rna_PF3D7_0531500-1	Pf3D7_05_v3	1288559	1289308	PF3D7_0531500-1	unspecified+product	PF3D7_0531500-1	750	PF3D7_0531500
Pf3D7_05_v3	1288729	T	-872			0	0	0	0	0	0	1	1	1	1	rna_PF3D7_0531500-1	rna_PF3D7_0531500-1	Pf3D7_05_v3	1288559	1289308	PF3D7_0531500-1	unspecified+product	PF3D7_0531500-1	750	PF3D7_0531500
Pf3D7_05_v3	1288730	A	-871			0	0	0	0	0	0	1	1	1	1	rna_PF3D7_0531500-1	rna_PF3D7_0531500-1	Pf3D7_05_v3	1288559	1289308	PF3D7_0531500-1	unspecified+product	PF3D7_0531500-1	750	PF3D7_0531500
Pf3D7_05_v3	1288731	T	-870			0	0	0	0	0	0	1	1	1	1	rna_PF3D7_0531500-1	rna_PF3D7_0531500-1	Pf3D7_05_v3	1288559	1289308	PF3D7_0531500-1	unspecified+product	PF3D7_0531500-1	750	PF3D7_0531500
Pf3D7_05_v3	1288732	A	-869			0	0	0	0	1	0	1	1	0.796748	0.796748	rna_PF3D7_0531500-1	rna_PF3D7_0531500-1	Pf3D7_05_v3	1288559	1289308	PF3D7_0531500-1	unspecified+product	PF3D7_0531500-1	750	PF3D7_0531500
Pf3D7_05_v3	1288733	T	-868			0	0	0	0	0	0	1	1	1	1	rna_PF3D7_0531500-1	rna_PF3D7_0531500-1	Pf3D7_05_v3	1288559	1289308	PF3D7_0531500-1	unspecified+product	PF3D7_0531500-1	750	PF3D7_0531500
Pf3D7_05_v3	1288734	A	-867			0	0	0	0	0	0	1	1	1	1	rna_PF3D7_0531500-1	rna_PF3D7_0531500-1	Pf3D7_05_v3	1288559	1289308	PF3D7_0531500-1	unspecified+product	PF3D7_0531500-1	750	PF3D7_0531500
Pf3D7_05_v3	1288735	T	-866			0	0	0	0	0	0	1	1	1	1	rna_PF3D7_0531500-1	rna_PF3D7_0531500-1	Pf3D7_05_v3	1288559	1289308	PF3D7_0531500-1	unspecified+product	PF3D7_0531500-1	750	PF3D7_0531500
Pf3D7_05_v3	1288736	A	-865			0	0	0	0	0	0	1	1	1	1	rna_PF3D7_0531500-1	rna_PF3D7_0531500-1	Pf3D7_05_v3	1288559	1289308	PF3D7_0531500-1	unspecified+product	PF3D7_0531500-1	750	PF3D7_0531500
Pf3D7_05_v3	1288737	T	-864			1	0	0	1	0	0	1.2	1	1.20921	1	rna_PF3D7_0531500-1	rna_PF3D7_0531500-1	Pf3D7_05_v3	1288559	1289308	PF3D7_0531500-1	unspecified+product	PF3D7_0531500-1	750	PF3D7_0531500
Pf3D7_05_v3	1288738	C	-863			0	0	0	0	0	0	1	1	1	1	rna_PF3D7_0531500-1	rna_PF3D7_0531500-1	Pf3D7_05_v3	1288559	1289308	PF3D7_0531500-1	unspecified+product	PF3D7_0531500-1	750	PF3D7_0531500
Pf3D7_05_v3	1288739	T	-862			1	0	0	0	0	0	1.2	1	1	1	rna_PF3D7_0531500-1	rna_PF3D7_0531500-1	Pf3D7_05_v3	1288559	1289308	PF3D7_0531500-1	unspecified+product	PF3D7_0531500-1	750	PF3D7_0531500
Pf3D7_05_v3	1288740	A	-861			0	0	0	1	0	0	1	1	1.20921	1	rna_PF3D7_0531500-1	rna_PF3D7_0531500-1	Pf3D7_05_v3	1288559	1289308	PF3D7_0531500-1	unspecified+product	PF3D7_0531500-1	750	PF3D7_0531500
Pf3D7_05_v3	1288741	T	-860			0	0	0	0	0	0	1	1	1	1	rna_PF3D7_0531500-1	rna_PF3D7_0531500-1	Pf3D7_05_v3	1288559	1289308	PF3D7_0531500-1	unspecified+product	PF3D7_0531500-1	750	PF3D7_0531500
Pf3D7_05_v3	1288742	T	-859			0	0	0	0	0	0	1	1	1	1	rna_PF3D7_0531500-1	rna_PF3D7_0531500-1	Pf3D7_05_v3	1288559	1289308	PF3D7_0531500-1	unspecified+product	PF3D7_0531500-1	750	PF3D7_0531500
Pf3D7_05_v3	1288743	A	-858			0	0	0	0	0	0	1	1	1	1	rna_PF3D7_0531500-1	rna_PF3D7_0531500-1	Pf3D7_05_v3	1288559	1289308	PF3D7_0531500-1	unspecified+product	PF3D7_0531500-1	750	PF3D7_0531500
Pf3D7_05_v3	1288744	A	-857			0	0	0	0	0	0	1	1	1	1	rna_PF3D7_0531500-1	rna_PF3D7_0531500-1	Pf3D7_05_v3	1288559	1289308	PF3D7_0531500-1	unspecified+product	PF3D7_0531500-1	750	PF3D7_0531500
Pf3D7_05_v3	1288745	A	-856			0	1	0	0	0	0	0.741745	0.741745	1	1	rna_PF3D7_0531500-1	rna_PF3D7_0531500-1	Pf3D7_05_v3	1288559	1289308	PF3D7_0531500-1	unspecified+product	PF3D7_0531500-1	750	PF3D7_0531500
Pf3D7_05_v3	1288746	C	-855			0	0	0	2	0	0	1	1	1.41843	1	rna_PF3D7_0531500-1	rna_PF3D7_0531500-1	Pf3D7_05_v3	1288559	1289308	PF3D7_0531500-1	unspecified+product	PF3D7_0531500-1	750	PF3D7_0531500
Pf3D7_05_v3	1288747	T	-854			0	0	0	0	0	0	1	1	1	1	rna_PF3D7_0531500-1	rna_PF3D7_0531500-1	Pf3D7_05_v3	1288559	1289308	PF3D7_0531500-1	unspecified+product	PF3D7_0531500-1	750	PF3D7_0531500
Pf3D7_05_v3	1288748	T	-853			1	0	0	0	0	0	1.2	1	1	1	rna_PF3D7_0531500-1	rna_PF3D7_0531500-1	Pf3D7_05_v3	1288559	1289308	PF3D7_0531500-1	unspecified+product	PF3D7_0531500-1	750	PF3D7_0531500
Pf3D7_05_v3	1288749	T	-852			0	0	0	0	0	0	1	1	1	1	rna_PF3D7_0531500-1	rna_PF3D7_0531500-1	Pf3D7_05_v3	1288559	1289308	PF3D7_0531500-1	unspecified+product	PF3D7_0531500-1	750	PF3D7_0531500
Pf3D7_05_v3	1288750	T	-851			1	0	0	0	0	0	1.2	1	1	1	rna_PF3D7_0531500-1	rna_PF3D7_0531500-1	Pf3D7_05_v3	1288559	1289308	PF3D7_0531500-1	unspecified+product	PF3D7_0531500-1	750	PF3D7_0531500
Pf3D7_05_v3	1288751	T	-850			0	0	0	0	0	0	1	1	1	1	rna_PF3D7_0531500-1	rna_PF3D7_0531500-1	Pf3D7_05_v3	1288559	1289308	PF3D7_0531500-1	unspecified+product	PF3D7_0531500-1	750	PF3D7_0531500
Pf3D7_05_v3	1288752	G	-849			0	0	0	1	0	0	1	1	1.20921	1	rna_PF3D7_0531500-1	rna_PF3D7_0531500-1	Pf3D7_05_v3	1288559	1289308	PF3D7_0531500-1	unspecified+product	PF3D7_0531500-1	750	PF3D7_0531500
Pf3D7_05_v3	1288753	A	-848			0	0	0	0	0	0	1	1	1	1	rna_PF3D7_0531500-1	rna_PF3D7_0531500-1	Pf3D7_05_v3	1288559	1289308	PF3D7_0531500-1	unspecified+product	PF3D7_0531500-1	750	PF3D7_0531500
Pf3D7_05_v3	1288754	A	-847			0	0	0	0	0	0	1	1	1	1	rna_PF3D7_0531500-1	rna_PF3D7_0531500-1	Pf3D7_05_v3	1288559	1289308	PF3D7_0531500-1	unspecified+product	PF3D7_0531500-1	750	PF3D7_0531500
Pf3D7_05_v3	1288755	C	-846			0	0	0	0	0	0	1	1	1	1	rna_PF3D7_0531500-1	rna_PF3D7_0531500-1	Pf3D7_05_v3	1288559	1289308	PF3D7_0531500-1	unspecified+product	PF3D7_0531500-1	750	PF3D7_0531500
Pf3D7_05_v3	1288756	T	-845			0	0	0	0	0	0	1	1	1	1	rna_PF3D7_0531500-1	rna_PF3D7_0531500-1	Pf3D7_05_v3	1288559	1289308	PF3D7_0531500-1	unspecified+product	PF3D7_0531500-1	750	PF3D7_0531500
Pf3D7_05_v3	1288757	T	-844			0	0	0	0	0	0	1	1	1	1	rna_PF3D7_0531500-1	rna_PF3D7_0531500-1	Pf3D7_05_v3	1288559	1289308	PF3D7_0531500-1	unspecified+product	PF3D7_0531500-1	750	PF3D7_0531500
Pf3D7_05_v3	1288758	A	-843			0	0	0	0	0	0	1	1	1	1	rna_PF3D7_0531500-1	rna_PF3D7_0531500-1	Pf3D7_05_v3	1288559	1289308	PF3D7_0531500-1	unspecified+product	PF3D7_0531500-1	750	PF3D7_0531500
Pf3D7_05_v3	1288759	G	-842			0	0	0	0	0	0	1	1	1	1	rna_PF3D7_0531500-1	rna_PF3D7_0531500-1	Pf3D7_05_v3	1288559	1289308	PF3D7_0531500-1	unspecified+product	PF3D7_0531500-1	750	PF3D7_0531500
Pf3D7_05_v3	1288760	T	-841			0	0	0	0	0	0	1	1	1	1	rna_PF3D7_0531500-1	rna_PF3D7_0531500-1	Pf3D7_05_v3	1288559	1289308	PF3D7_0531500-1	unspecified+product	PF3D7_0531500-1	750	PF3D7_0531500
Pf3D7_05_v3	1288761	T	-840			0	1	0	0	0	0	0.741745	0.741745	1	1	rna_PF3D7_0531500-1	rna_PF3D7_0531500-1	Pf3D7_05_v3	1288559	1289308	PF3D7_0531500-1	unspecified+product	PF3D7_0531500-1	750	PF3D7_0531500
Pf3D7_05_v3	1288762	T	-839			0	0	0	0	0	0	1	1	1	1	rna_PF3D7_0531500-1	rna_PF3D7_0531500-1	Pf3D7_05_v3	1288559	1289308	PF3D7_0531500-1	unspecified+product	PF3D7_0531500-1	750	PF3D7_0531500
Pf3D7_05_v3	1288763	A	-838			0	0	0	0	0	0	1	1	1	1	rna_PF3D7_0531500-1	rna_PF3D7_0531500-1	Pf3D7_05_v3	1288559	1289308	PF3D7_0531500-1	unspecified+product	PF3D7_0531500-1	750	PF3D7_0531500
Pf3D7_05_v3	1288764	T	-837			1	0	0	1	0	0	1.2	1	1.20921	1	rna_PF3D7_0531500-1	rna_PF3D7_0531500-1	Pf3D7_05_v3	1288559	1289308	PF3D7_0531500-1	unspecified+product	PF3D7_0531500-1	750	PF3D7_0531500
Pf3D7_05_v3	1288765	T	-836			0	0	0	0	0	0	1	1	1	1	rna_PF3D7_0531500-1	rna_PF3D7_0531500-1	Pf3D7_05_v3	1288559	1289308	PF3D7_0531500-1	unspecified+product	PF3D7_0531500-1	750	PF3D7_0531500
Pf3D7_05_v3	1288766	T	-835			0	0	0	1	0	0	1	1	1.20921	1	rna_PF3D7_0531500-1	rna_PF3D7_0531500-1	Pf3D7_05_v3	1288559	1289308	PF3D7_0531500-1	unspecified+product	PF3D7_0531500-1	750	PF3D7_0531500
Pf3D7_05_v3	1288767	T	-834			0	0	0	0	0	0	1	1	1	1	rna_PF3D7_0531500-1	rna_PF3D7_0531500-1	Pf3D7_05_v3	1288559	1289308	PF3D7_0531500-1	unspecified+product	PF3D7_0531500-1	750	PF3D7_0531500
Pf3D7_05_v3	1288768	A	-833			0	0	0	0	0	0	1	1	1	1	rna_PF3D7_0531500-1	rna_PF3D7_0531500-1	Pf3D7_05_v3	1288559	1289308	PF3D7_0531500-1	unspecified+product	PF3D7_0531500-1	750	PF3D7_0531500
Pf3D7_05_v3	1288769	A	-832			0	0	0	0	0	0	1	1	1	1	rna_PF3D7_0531500-1	rna_PF3D7_0531500-1	Pf3D7_05_v3	1288559	1289308	PF3D7_0531500-1	unspecified+product	PF3D7_0531500-1	750	PF3D7_0531500
Pf3D7_05_v3	1288770	C	-831			0	0	0	0	0	0	1	1	1	1	rna_PF3D7_0531500-1	rna_PF3D7_0531500-1	Pf3D7_05_v3	1288559	1289308	PF3D7_0531500-1	unspecified+product	PF3D7_0531500-1	750	PF3D7_0531500
Pf3D7_05_v3	1288771	A	-830			0	1	0	0	0	0	0.741745	0.741745	1	1	rna_PF3D7_0531500-1	rna_PF3D7_0531500-1	Pf3D7_05_v3	1288559	1289308	PF3D7_0531500-1	unspecified+product	PF3D7_0531500-1	750	PF3D7_0531500
Pf3D7_05_v3	1288772	T	-829			0	0	0	0	0	0	1	1	1	1	rna_PF3D7_0531500-1	rna_PF3D7_0531500-1	Pf3D7_05_v3	1288559	1289308	PF3D7_0531500-1	unspecified+product	PF3D7_0531500-1	750	PF3D7_0531500
Pf3D7_05_v3	1288773	T	-828			0	0	0	0	0	0	1	1	1	1	rna_PF3D7_0531500-1	rna_PF3D7_0531500-1	Pf3D7_05_v3	1288559	1289308	PF3D7_0531500-1	unspecified+product	PF3D7_0531500-1	750	PF3D7_0531500
Pf3D7_05_v3	1288774	T	-827			0	0	0	0	0	0	1	1	1	1	rna_PF3D7_0531500-1	rna_PF3D7_0531500-1	Pf3D7_05_v3	1288559	1289308	PF3D7_0531500-1	unspecified+product	PF3D7_0531500-1	750	PF3D7_0531500
Pf3D7_05_v3	1288775	T	-826			0	0	0	0	0	0	1	1	1	1	rna_PF3D7_0531500-1	rna_PF3D7_0531500-1	Pf3D7_05_v3	1288559	1289308	PF3D7_0531500-1	unspecified+product	PF3D7_0531500-1	750	PF3D7_0531500
Pf3D7_05_v3	1288776	T	-825			0	0	0	0	0	0	1	1	1	1	rna_PF3D7_0531500-1	rna_PF3D7_0531500-1	Pf3D7_05_v3	1288559	1289308	PF3D7_0531500-1	unspecified+product	PF3D7_0531500-1	750	PF3D7_0531500
Pf3D7_05_v3	1288777	A	-824			2	0	0	1	0	0	1.4	1	1.20921	1	rna_PF3D7_0531500-1	rna_PF3D7_0531500-1	Pf3D7_05_v3	1288559	1289308	PF3D7_0531500-1	unspecified+product	PF3D7_0531500-1	750	PF3D7_0531500
Pf3D7_05_v3	1288778	T	-823			0	0	0	0	0	0	1	1	1	1	rna_PF3D7_0531500-1	rna_PF3D7_0531500-1	Pf3D7_05_v3	1288559	1289308	PF3D7_0531500-1	unspecified+product	PF3D7_0531500-1	750	PF3D7_0531500
Pf3D7_05_v3	1288779	T	-822			0	0	0	0	0	0	1	1	1	1	rna_PF3D7_0531500-1	rna_PF3D7_0531500-1	Pf3D7_05_v3	1288559	1289308	PF3D7_0531500-1	unspecified+product	PF3D7_0531500-1	750	PF3D7_0531500
Pf3D7_05_v3	1288780	T	-821			0	0	0	0	0	0	1	1	1	1	rna_PF3D7_0531500-1	rna_PF3D7_0531500-1	Pf3D7_05_v3	1288559	1289308	PF3D7_0531500-1	unspecified+product	PF3D7_0531500-1	750	PF3D7_0531500
Pf3D7_05_v3	1288781	T	-820			0	0	0	0	0	0	1	1	1	1	rna_PF3D7_0531500-1	rna_PF3D7_0531500-1	Pf3D7_05_v3	1288559	1289308	PF3D7_0531500-1	unspecified+product	PF3D7_0531500-1	750	PF3D7_0531500
Pf3D7_05_v3	1288782	T	-819			2	0	0	1	0	0	1.4	1	1.20921	1	rna_PF3D7_0531500-1	rna_PF3D7_0531500-1	Pf3D7_05_v3	1288559	1289308	PF3D7_0531500-1	unspecified+product	PF3D7_0531500-1	750	PF3D7_0531500
Pf3D7_05_v3	1288783	A	-818			0	0	0	0	0	0	1	1	1	1	rna_PF3D7_0531500-1	rna_PF3D7_0531500-1	Pf3D7_05_v3	1288559	1289308	PF3D7_0531500-1	unspecified+product	PF3D7_0531500-1	750	PF3D7_0531500
Pf3D7_05_v3	1288784	T	-817			1	0	0	0	0	0	1.2	1	1	1	rna_PF3D7_0531500-1	rna_PF3D7_0531500-1	Pf3D7_05_v3	1288559	1289308	PF3D7_0531500-1	unspecified+product	PF3D7_0531500-1	750	PF3D7_0531500
Pf3D7_05_v3	1288785	A	-816			2	0	0	0	0	0	1.4	1	1	1	rna_PF3D7_0531500-1	rna_PF3D7_0531500-1	Pf3D7_05_v3	1288559	1289308	PF3D7_0531500-1	unspecified+product	PF3D7_0531500-1	750	PF3D7_0531500
Pf3D7_05_v3	1288786	T	-815			0	0	0	0	0	0	1	1	1	1	rna_PF3D7_0531500-1	rna_PF3D7_0531500-1	Pf3D7_05_v3	1288559	1289308	PF3D7_0531500-1	unspecified+product	PF3D7_0531500-1	750	PF3D7_0531500
Pf3D7_05_v3	1288787	T	-814			0	0	0	0	0	0	1	1	1	1	rna_PF3D7_0531500-1	rna_PF3D7_0531500-1	Pf3D7_05_v3	1288559	1289308	PF3D7_0531500-1	unspecified+product	PF3D7_0531500-1	750	PF3D7_0531500
Pf3D7_05_v3	1288788	A	-813			0	0	0	0	0	0	1	1	1	1	rna_PF3D7_0531500-1	rna_PF3D7_0531500-1	Pf3D7_05_v3	1288559	1289308	PF3D7_0531500-1	unspecified+product	PF3D7_0531500-1	750	PF3D7_0531500
Pf3D7_05_v3	1288789	A	-812			1	0	0	0	0	0	1.2	1	1	1	rna_PF3D7_0531500-1	rna_PF3D7_0531500-1	Pf3D7_05_v3	1288559	1289308	PF3D7_0531500-1	unspecified+product	PF3D7_0531500-1	750	PF3D7_0531500
Pf3D7_05_v3	1288790	A	-811			0	0	0	3	0	0	1	1	1.62764	1	rna_PF3D7_0531500-1	rna_PF3D7_0531500-1	Pf3D7_05_v3	1288559	1289308	PF3D7_0531500-1	unspecified+product	PF3D7_0531500-1	750	PF3D7_0531500
Pf3D7_05_v3	1288791	A	-810			0	0	0	0	0	0	1	1	1	1	rna_PF3D7_0531500-1	rna_PF3D7_0531500-1	Pf3D7_05_v3	1288559	1289308	PF3D7_0531500-1	unspecified+product	PF3D7_0531500-1	750	PF3D7_0531500
Pf3D7_05_v3	1288792	C	-809			0	0	0	0	0	0	1	1	1	1	rna_PF3D7_0531500-1	rna_PF3D7_0531500-1	Pf3D7_05_v3	1288559	1289308	PF3D7_0531500-1	unspecified+product	PF3D7_0531500-1	750	PF3D7_0531500
Pf3D7_05_v3	1288793	A	-808			0	0	0	0	0	0	1	1	1	1	rna_PF3D7_0531500-1	rna_PF3D7_0531500-1	Pf3D7_05_v3	1288559	1289308	PF3D7_0531500-1	unspecified+product	PF3D7_0531500-1	750	PF3D7_0531500
Pf3D7_05_v3	1288794	A	-807			0	0	0	0	0	0	1	1	1	1	rna_PF3D7_0531500-1	rna_PF3D7_0531500-1	Pf3D7_05_v3	1288559	1289308	PF3D7_0531500-1	unspecified+product	PF3D7_0531500-1	750	PF3D7_0531500
Pf3D7_05_v3	1288795	T	-806			2	0	0	0	0	0	1.4	1	1	1	rna_PF3D7_0531500-1	rna_PF3D7_0531500-1	Pf3D7_05_v3	1288559	1289308	PF3D7_0531500-1	unspecified+product	PF3D7_0531500-1	750	PF3D7_0531500
Pf3D7_05_v3	1288796	T	-805			1	0	0	2	0	0	1.2	1	1.41843	1	rna_PF3D7_0531500-1	rna_PF3D7_0531500-1	Pf3D7_05_v3	1288559	1289308	PF3D7_0531500-1	unspecified+product	PF3D7_0531500-1	750	PF3D7_0531500
Pf3D7_05_v3	1288797	A	-804			0	0	0	0	1	0	1	1	0.796748	0.796748	rna_PF3D7_0531500-1	rna_PF3D7_0531500-1	Pf3D7_05_v3	1288559	1289308	PF3D7_0531500-1	unspecified+product	PF3D7_0531500-1	750	PF3D7_0531500
Pf3D7_05_v3	1288798	T	-803			1	0	0	1	0	0	1.2	1	1.20921	1	rna_PF3D7_0531500-1	rna_PF3D7_0531500-1	Pf3D7_05_v3	1288559	1289308	PF3D7_0531500-1	unspecified+product	PF3D7_0531500-1	750	PF3D7_0531500
Pf3D7_05_v3	1288799	A	-802			0	0	0	0	0	0	1	1	1	1	rna_PF3D7_0531500-1	rna_PF3D7_0531500-1	Pf3D7_05_v3	1288559	1289308	PF3D7_0531500-1	unspecified+product	PF3D7_0531500-1	750	PF3D7_0531500
Pf3D7_05_v3	1288800	T	-801			0	0	0	0	0	0	1	1	1	1	rna_PF3D7_0531500-1	rna_PF3D7_0531500-1	Pf3D7_05_v3	1288559	1289308	PF3D7_0531500-1	unspecified+product	PF3D7_0531500-1	750	PF3D7_0531500
Pf3D7_05_v3	1288801	T	-800			0	0	0	0	0	0	1	1	1	1	rna_PF3D7_0531500-1	rna_PF3D7_0531500-1	Pf3D7_05_v3	1288559	1289308	PF3D7_0531500-1	unspecified+product	PF3D7_0531500-1	750	PF3D7_0531500
Pf3D7_05_v3	1288802	T	-799			0	0	0	0	0	0	1	1	1	1	rna_PF3D7_0531500-1	rna_PF3D7_0531500-1	Pf3D7_05_v3	1288559	1289308	PF3D7_0531500-1	unspecified+product	PF3D7_0531500-1	750	PF3D7_0531500
Pf3D7_05_v3	1288803	A	-798			0	0	0	0	0	0	1	1	1	1	rna_PF3D7_0531500-1	rna_PF3D7_0531500-1	Pf3D7_05_v3	1288559	1289308	PF3D7_0531500-1	unspecified+product	PF3D7_0531500-1	750	PF3D7_0531500
Pf3D7_05_v3	1288804	A	-797			1	0	0	2	0	0	1.2	1	1.41843	1	rna_PF3D7_0531500-1	rna_PF3D7_0531500-1	Pf3D7_05_v3	1288559	1289308	PF3D7_0531500-1	unspecified+product	PF3D7_0531500-1	750	PF3D7_0531500
Pf3D7_05_v3	1288805	G	-796			0	0	0	0	0	0	1	1	1	1	rna_PF3D7_0531500-1	rna_PF3D7_0531500-1	Pf3D7_05_v3	1288559	1289308	PF3D7_0531500-1	unspecified+product	PF3D7_0531500-1	750	PF3D7_0531500
Pf3D7_05_v3	1288806	T	-795			0	0	0	0	0	0	1	1	1	1	rna_PF3D7_0531500-1	rna_PF3D7_0531500-1	Pf3D7_05_v3	1288559	1289308	PF3D7_0531500-1	unspecified+product	PF3D7_0531500-1	750	PF3D7_0531500
Pf3D7_05_v3	1288807	T	-794			0	0	0	0	0	0	1	1	1	1	rna_PF3D7_0531500-1	rna_PF3D7_0531500-1	Pf3D7_05_v3	1288559	1289308	PF3D7_0531500-1	unspecified+product	PF3D7_0531500-1	750	PF3D7_0531500
Pf3D7_05_v3	1288808	A	-793			1	0	0	0	0	0	1.2	1	1	1	rna_PF3D7_0531500-1	rna_PF3D7_0531500-1	Pf3D7_05_v3	1288559	1289308	PF3D7_0531500-1	unspecified+product	PF3D7_0531500-1	750	PF3D7_0531500
Pf3D7_05_v3	1288809	A	-792			1	0	0	0	0	0	1.2	1	1	1	rna_PF3D7_0531500-1	rna_PF3D7_0531500-1	Pf3D7_05_v3	1288559	1289308	PF3D7_0531500-1	unspecified+product	PF3D7_0531500-1	750	PF3D7_0531500
Pf3D7_05_v3	1288810	A	-791			0	0	0	0	0	0	1	1	1	1	rna_PF3D7_0531500-1	rna_PF3D7_0531500-1	Pf3D7_05_v3	1288559	1289308	PF3D7_0531500-1	unspecified+product	PF3D7_0531500-1	750	PF3D7_0531500
Pf3D7_05_v3	1288811	T	-790			0	0	0	0	0	0	1	1	1	1	rna_PF3D7_0531500-1	rna_PF3D7_0531500-1	Pf3D7_05_v3	1288559	1289308	PF3D7_0531500-1	unspecified+product	PF3D7_0531500-1	750	PF3D7_0531500
Pf3D7_05_v3	1288812	A	-789			0	0	0	0	0	0	1	1	1	1	rna_PF3D7_0531500-1	rna_PF3D7_0531500-1	Pf3D7_05_v3	1288559	1289308	PF3D7_0531500-1	unspecified+product	PF3D7_0531500-1	750	PF3D7_0531500
Pf3D7_05_v3	1288813	A	-788			0	0	0	0	0	0	1	1	1	1	rna_PF3D7_0531500-1	rna_PF3D7_0531500-1	Pf3D7_05_v3	1288559	1289308	PF3D7_0531500-1	unspecified+product	PF3D7_0531500-1	750	PF3D7_0531500
Pf3D7_05_v3	1288814	T	-787			0	0	0	0	0	0	1	1	1	1	rna_PF3D7_0531500-1	rna_PF3D7_0531500-1	Pf3D7_05_v3	1288559	1289308	PF3D7_0531500-1	unspecified+product	PF3D7_0531500-1	750	PF3D7_0531500
Pf3D7_05_v3	1288815	T	-786			0	0	0	0	0	0	1	1	1	1	rna_PF3D7_0531500-1	rna_PF3D7_0531500-1	Pf3D7_05_v3	1288559	1289308	PF3D7_0531500-1	unspecified+product	PF3D7_0531500-1	750	PF3D7_0531500
Pf3D7_05_v3	1288816	T	-785			0	0	0	0	0	0	1	1	1	1	rna_PF3D7_0531500-1	rna_PF3D7_0531500-1	Pf3D7_05_v3	1288559	1289308	PF3D7_0531500-1	unspecified+product	PF3D7_0531500-1	750	PF3D7_0531500
Pf3D7_05_v3	1288817	T	-784			0	0	0	0	0	0	1	1	1	1	rna_PF3D7_0531500-1	rna_PF3D7_0531500-1	Pf3D7_05_v3	1288559	1289308	PF3D7_0531500-1	unspecified+product	PF3D7_0531500-1	750	PF3D7_0531500
Pf3D7_05_v3	1288818	A	-783			1	0	0	0	0	0	1.2	1	1	1	rna_PF3D7_0531500-1	rna_PF3D7_0531500-1	Pf3D7_05_v3	1288559	1289308	PF3D7_0531500-1	unspecified+product	PF3D7_0531500-1	750	PF3D7_0531500
Pf3D7_05_v3	1288819	A	-782			0	0	0	0	0	0	1	1	1	1	rna_PF3D7_0531500-1	rna_PF3D7_0531500-1	Pf3D7_05_v3	1288559	1289308	PF3D7_0531500-1	unspecified+product	PF3D7_0531500-1	750	PF3D7_0531500
Pf3D7_05_v3	1288820	A	-781			0	0	0	0	0	0	1	1	1	1	rna_PF3D7_0531500-1	rna_PF3D7_0531500-1	Pf3D7_05_v3	1288559	1289308	PF3D7_0531500-1	unspecified+product	PF3D7_0531500-1	750	PF3D7_0531500
Pf3D7_05_v3	1288821	T	-780			1	0	0	0	0	0	1.2	1	1	1	rna_PF3D7_0531500-1	rna_PF3D7_0531500-1	Pf3D7_05_v3	1288559	1289308	PF3D7_0531500-1	unspecified+product	PF3D7_0531500-1	750	PF3D7_0531500
Pf3D7_05_v3	1288822	A	-779			0	0	0	0	0	0	1	1	1	1	rna_PF3D7_0531500-1	rna_PF3D7_0531500-1	Pf3D7_05_v3	1288559	1289308	PF3D7_0531500-1	unspecified+product	PF3D7_0531500-1	750	PF3D7_0531500
Pf3D7_05_v3	1288823	A	-778			0	0	1	0	0	0	1	1.2037	1	1	rna_PF3D7_0531500-1	rna_PF3D7_0531500-1	Pf3D7_05_v3	1288559	1289308	PF3D7_0531500-1	unspecified+product	PF3D7_0531500-1	750	PF3D7_0531500
Pf3D7_05_v3	1288824	A	-777			2	0	0	0	0	0	1.4	1	1	1	rna_PF3D7_0531500-1	rna_PF3D7_0531500-1	Pf3D7_05_v3	1288559	1289308	PF3D7_0531500-1	unspecified+product	PF3D7_0531500-1	750	PF3D7_0531500
Pf3D7_05_v3	1288825	C	-776			0	0	0	0	0	0	1	1	1	1	rna_PF3D7_0531500-1	rna_PF3D7_0531500-1	Pf3D7_05_v3	1288559	1289308	PF3D7_0531500-1	unspecified+product	PF3D7_0531500-1	750	PF3D7_0531500
Pf3D7_05_v3	1288826	T	-775			0	0	0	0	0	0	1	1	1	1	rna_PF3D7_0531500-1	rna_PF3D7_0531500-1	Pf3D7_05_v3	1288559	1289308	PF3D7_0531500-1	unspecified+product	PF3D7_0531500-1	750	PF3D7_0531500
Pf3D7_05_v3	1288827	T	-774			0	0	0	0	0	0	1	1	1	1	rna_PF3D7_0531500-1	rna_PF3D7_0531500-1	Pf3D7_05_v3	1288559	1289308	PF3D7_0531500-1	unspecified+product	PF3D7_0531500-1	750	PF3D7_0531500
Pf3D7_05_v3	1288828	T	-773			0	0	0	0	0	0	1	1	1	1	rna_PF3D7_0531500-1	rna_PF3D7_0531500-1	Pf3D7_05_v3	1288559	1289308	PF3D7_0531500-1	unspecified+product	PF3D7_0531500-1	750	PF3D7_0531500
Pf3D7_05_v3	1288829	T	-772			0	0	0	0	0	0	1	1	1	1	rna_PF3D7_0531500-1	rna_PF3D7_0531500-1	Pf3D7_05_v3	1288559	1289308	PF3D7_0531500-1	unspecified+product	PF3D7_0531500-1	750	PF3D7_0531500
Pf3D7_05_v3	1288830	T	-771			0	0	0	0	0	0	1	1	1	1	rna_PF3D7_0531500-1	rna_PF3D7_0531500-1	Pf3D7_05_v3	1288559	1289308	PF3D7_0531500-1	unspecified+product	PF3D7_0531500-1	750	PF3D7_0531500
Pf3D7_05_v3	1288831	T	-770			1	0	0	0	0	0	1.2	1	1	1	rna_PF3D7_0531500-1	rna_PF3D7_0531500-1	Pf3D7_05_v3	1288559	1289308	PF3D7_0531500-1	unspecified+product	PF3D7_0531500-1	750	PF3D7_0531500
Pf3D7_05_v3	1288832	T	-769			0	0	0	0	0	0	1	1	1	1	rna_PF3D7_0531500-1	rna_PF3D7_0531500-1	Pf3D7_05_v3	1288559	1289308	PF3D7_0531500-1	unspecified+product	PF3D7_0531500-1	750	PF3D7_0531500
Pf3D7_05_v3	1288833	T	-768			0	0	0	0	0	0	1	1	1	1	rna_PF3D7_0531500-1	rna_PF3D7_0531500-1	Pf3D7_05_v3	1288559	1289308	PF3D7_0531500-1	unspecified+product	PF3D7_0531500-1	750	PF3D7_0531500
Pf3D7_05_v3	1288834	T	-767			0	0	0	0	0	0	1	1	1	1	rna_PF3D7_0531500-1	rna_PF3D7_0531500-1	Pf3D7_05_v3	1288559	1289308	PF3D7_0531500-1	unspecified+product	PF3D7_0531500-1	750	PF3D7_0531500
Pf3D7_05_v3	1288835	T	-766			0	0	0	0	0	0	1	1	1	1	rna_PF3D7_0531500-1	rna_PF3D7_0531500-1	Pf3D7_05_v3	1288559	1289308	PF3D7_0531500-1	unspecified+product	PF3D7_0531500-1	750	PF3D7_0531500
Pf3D7_05_v3	1288836	T	-765			0	0	0	0	0	0	1	1	1	1	rna_PF3D7_0531500-1	rna_PF3D7_0531500-1	Pf3D7_05_v3	1288559	1289308	PF3D7_0531500-1	unspecified+product	PF3D7_0531500-1	750	PF3D7_0531500
Pf3D7_05_v3	1288837	T	-764			0	0	0	0	0	0	1	1	1	1	rna_PF3D7_0531500-1	rna_PF3D7_0531500-1	Pf3D7_05_v3	1288559	1289308	PF3D7_0531500-1	unspecified+product	PF3D7_0531500-1	750	PF3D7_0531500
Pf3D7_05_v3	1288839	C	-762			2	0	0	0	0	0	1.4	1	1	1	rna_PF3D7_0531500-1	rna_PF3D7_0531500-1	Pf3D7_05_v3	1288559	1289308	PF3D7_0531500-1	unspecified+product	PF3D7_0531500-1	750	PF3D7_0531500
Pf3D7_05_v3	1288840	T	-761			0	0	0	0	0	0	1	1	1	1	rna_PF3D7_0531500-1	rna_PF3D7_0531500-1	Pf3D7_05_v3	1288559	1289308	PF3D7_0531500-1	unspecified+product	PF3D7_0531500-1	750	PF3D7_0531500
Pf3D7_05_v3	1288841	T	-760			0	0	0	0	0	0	1	1	1	1	rna_PF3D7_0531500-1	rna_PF3D7_0531500-1	Pf3D7_05_v3	1288559	1289308	PF3D7_0531500-1	unspecified+product	PF3D7_0531500-1	750	PF3D7_0531500
Pf3D7_05_v3	1288842	T	-759			0	0	0	0	0	0	1	1	1	1	rna_PF3D7_0531500-1	rna_PF3D7_0531500-1	Pf3D7_05_v3	1288559	1289308	PF3D7_0531500-1	unspecified+product	PF3D7_0531500-1	750	PF3D7_0531500
Pf3D7_05_v3	1288843	T	-758			1	0	0	0	0	0	1.2	1	1	1	rna_PF3D7_0531500-1	rna_PF3D7_0531500-1	Pf3D7_05_v3	1288559	1289308	PF3D7_0531500-1	unspecified+product	PF3D7_0531500-1	750	PF3D7_0531500
Pf3D7_05_v3	1288844	T	-757			0	0	0	0	0	0	1	1	1	1	rna_PF3D7_0531500-1	rna_PF3D7_0531500-1	Pf3D7_05_v3	1288559	1289308	PF3D7_0531500-1	unspecified+product	PF3D7_0531500-1	750	PF3D7_0531500
Pf3D7_05_v3	1288845	T	-756			0	0	0	0	0	0	1	1	1	1	rna_PF3D7_0531500-1	rna_PF3D7_0531500-1	Pf3D7_05_v3	1288559	1289308	PF3D7_0531500-1	unspecified+product	PF3D7_0531500-1	750	PF3D7_0531500
Pf3D7_05_v3	1288846	G	-755			0	0	0	0	0	0	1	1	1	1	rna_PF3D7_0531500-1	rna_PF3D7_0531500-1	Pf3D7_05_v3	1288559	1289308	PF3D7_0531500-1	unspecified+product	PF3D7_0531500-1	750	PF3D7_0531500
Pf3D7_05_v3	1288847	A	-754			0	0	0	0	0	0	1	1	1	1	rna_PF3D7_0531500-1	rna_PF3D7_0531500-1	Pf3D7_05_v3	1288559	1289308	PF3D7_0531500-1	unspecified+product	PF3D7_0531500-1	750	PF3D7_0531500
Pf3D7_05_v3	1288848	T	-753			0	0	0	0	0	0	1	1	1	1	rna_PF3D7_0531500-1	rna_PF3D7_0531500-1	Pf3D7_05_v3	1288559	1289308	PF3D7_0531500-1	unspecified+product	PF3D7_0531500-1	750	PF3D7_0531500
Pf3D7_05_v3	1288849	A	-752			0	0	0	0	0	0	1	1	1	1	rna_PF3D7_0531500-1	rna_PF3D7_0531500-1	Pf3D7_05_v3	1288559	1289308	PF3D7_0531500-1	unspecified+product	PF3D7_0531500-1	750	PF3D7_0531500
Pf3D7_05_v3	1288850	A	-751			0	0	0	0	0	0	1	1	1	1	rna_PF3D7_0531500-1	rna_PF3D7_0531500-1	Pf3D7_05_v3	1288559	1289308	PF3D7_0531500-1	unspecified+product	PF3D7_0531500-1	750	PF3D7_0531500
Pf3D7_05_v3	1288851	T	-750			0	0	0	0	0	0	1	1	1	1	rna_PF3D7_0531500-1	rna_PF3D7_0531500-1	Pf3D7_05_v3	1288559	1289308	PF3D7_0531500-1	unspecified+product	PF3D7_0531500-1	750	PF3D7_0531500
Pf3D7_05_v3	1288852	A	-749			2	0	0	0	0	0	1.4	1	1	1	rna_PF3D7_0531500-1	rna_PF3D7_0531500-1	Pf3D7_05_v3	1288559	1289308	PF3D7_0531500-1	unspecified+product	PF3D7_0531500-1	750	PF3D7_0531500
Pf3D7_05_v3	1288853	T	-748			0	0	0	0	0	0	1	1	1	1	rna_PF3D7_0531500-1	rna_PF3D7_0531500-1	Pf3D7_05_v3	1288559	1289308	PF3D7_0531500-1	unspecified+product	PF3D7_0531500-1	750	PF3D7_0531500
Pf3D7_05_v3	1288854	A	-747			2	0	0	0	0	0	1.4	1	1	1	rna_PF3D7_0531500-1	rna_PF3D7_0531500-1	Pf3D7_05_v3	1288559	1289308	PF3D7_0531500-1	unspecified+product	PF3D7_0531500-1	750	PF3D7_0531500
Pf3D7_05_v3	1288855	T	-746			0	0	0	0	0	0	1	1	1	1	rna_PF3D7_0531500-1	rna_PF3D7_0531500-1	Pf3D7_05_v3	1288559	1289308	PF3D7_0531500-1	unspecified+product	PF3D7_0531500-1	750	PF3D7_0531500
Pf3D7_05_v3	1288856	T	-745			1	0	0	0	0	0	1.2	1	1	1	rna_PF3D7_0531500-1	rna_PF3D7_0531500-1	Pf3D7_05_v3	1288559	1289308	PF3D7_0531500-1	unspecified+product	PF3D7_0531500-1	750	PF3D7_0531500
Pf3D7_05_v3	1288857	T	-744			0	0	0	0	0	0	1	1	1	1	rna_PF3D7_0531500-1	rna_PF3D7_0531500-1	Pf3D7_05_v3	1288559	1289308	PF3D7_0531500-1	unspecified+product	PF3D7_0531500-1	750	PF3D7_0531500
Pf3D7_05_v3	1288858	T	-743			0	0	0	0	0	0	1	1	1	1	rna_PF3D7_0531500-1	rna_PF3D7_0531500-1	Pf3D7_05_v3	1288559	1289308	PF3D7_0531500-1	unspecified+product	PF3D7_0531500-1	750	PF3D7_0531500
Pf3D7_05_v3	1288859	T	-742			0	0	0	1	0	0	1	1	1.20921	1	rna_PF3D7_0531500-1	rna_PF3D7_0531500-1	Pf3D7_05_v3	1288559	1289308	PF3D7_0531500-1	unspecified+product	PF3D7_0531500-1	750	PF3D7_0531500
Pf3D7_05_v3	1288860	A	-741			1	0	0	2	0	0	1.2	1	1.41843	1	rna_PF3D7_0531500-1	rna_PF3D7_0531500-1	Pf3D7_05_v3	1288559	1289308	PF3D7_0531500-1	unspecified+product	PF3D7_0531500-1	750	PF3D7_0531500
Pf3D7_05_v3	1288861	A	-740			3	0	0	0	0	0	1.6	1	1	1	rna_PF3D7_0531500-1	rna_PF3D7_0531500-1	Pf3D7_05_v3	1288559	1289308	PF3D7_0531500-1	unspecified+product	PF3D7_0531500-1	750	PF3D7_0531500
Pf3D7_05_v3	1288862	A	-739			0	0	1	0	0	0	1	1.2037	1	1	rna_PF3D7_0531500-1	rna_PF3D7_0531500-1	Pf3D7_05_v3	1288559	1289308	PF3D7_0531500-1	unspecified+product	PF3D7_0531500-1	750	PF3D7_0531500
Pf3D7_05_v3	1288863	T	-738			0	3	0	1	0	0	0.489113	0.489113	1.20921	1	rna_PF3D7_0531500-1	rna_PF3D7_0531500-1	Pf3D7_05_v3	1288559	1289308	PF3D7_0531500-1	unspecified+product	PF3D7_0531500-1	750	PF3D7_0531500
Pf3D7_05_v3	1288864	A	-737			0	0	0	0	0	1	1	1	1	1.24463	rna_PF3D7_0531500-1	rna_PF3D7_0531500-1	Pf3D7_05_v3	1288559	1289308	PF3D7_0531500-1	unspecified+product	PF3D7_0531500-1	750	PF3D7_0531500
Pf3D7_05_v3	1288865	T	-736			1	0	0	3	0	1	1.2	1	1.62764	1.24463	rna_PF3D7_0531500-1	rna_PF3D7_0531500-1	Pf3D7_05_v3	1288559	1289308	PF3D7_0531500-1	unspecified+product	PF3D7_0531500-1	750	PF3D7_0531500
Pf3D7_05_v3	1288866	T	-735			0	0	0	0	0	0	1	1	1	1	rna_PF3D7_0531500-1	rna_PF3D7_0531500-1	Pf3D7_05_v3	1288559	1289308	PF3D7_0531500-1	unspecified+product	PF3D7_0531500-1	750	PF3D7_0531500
Pf3D7_05_v3	1288867	A	-734			1	0	0	3	0	0	1.2	1	1.62764	1	rna_PF3D7_0531500-1	rna_PF3D7_0531500-1	Pf3D7_05_v3	1288559	1289308	PF3D7_0531500-1	unspecified+product	PF3D7_0531500-1	750	PF3D7_0531500
Pf3D7_05_v3	1288868	A	-733			0	0	0	1	0	0	1	1	1.20921	1	rna_PF3D7_0531500-1	rna_PF3D7_0531500-1	Pf3D7_05_v3	1288559	1289308	PF3D7_0531500-1	unspecified+product	PF3D7_0531500-1	750	PF3D7_0531500
Pf3D7_05_v3	1288869	T	-732			7	0	0	0	0	0	2.4	1	1	1	rna_PF3D7_0531500-1	rna_PF3D7_0531500-1	Pf3D7_05_v3	1288559	1289308	PF3D7_0531500-1	unspecified+product	PF3D7_0531500-1	750	PF3D7_0531500
[truncated: 3,019 more rows]

## Sheet: PF3D7_0725600. A1-18s
						raw read						icSHAPE scores
[truncated: 6,253 more rows]

## Sheet: PF3D7_1148600. S2-18s
						raw read						icSHAPE scores
[truncated: 420 more rows]

## Sheet: PF3D7_1371000. S2-18s
						raw read						icSHAPE scores
[truncated: 3,561 more rows]
